# Supplementary material for: Molecular evolutionary patterns of NAD+/Sirtuin aging signaling pathway across taxa
Source: PubMed Central journal article supplement (PMC5540417; doi:10.1371/journal.pone.0182306), 2017-08-02
Supplement: pone.0182306.s001.pdf [file pone.0182306.s001.pdf]

>platypus\_PARP1

ATGTTTCGATGGGAAGGTCCCACACTGGCACCATTTTACTTGTCTTCTGGAAGCGGGCACGG  
GTCATCTCCCATGCCGAGGTGGATGGTTTCCCCGAATTGCGGTGGGATGACCAGGAGAAG  
ATCAAGAAAGCCATAGAGACTGGAGGAGCCGCCACAGGTAAGGTGGAGACCAGGATGGC  
GGAGGAGGCAAGGGGGAGAAGACCCTGAATGACTTTGCAGCTGAATATGCCAAGTCTAAC  
AGGAGCACGTGCAAGGGATGTGACCAGAAAATCGAAAAGGGCCAGGTACGGCTCTCCAAG  
AAGATGGTGGATCCAGTGAAGCCACAGTTGGGGATGATTGACCGCTGGTACCATCCGGAC  
TGCTTCGTCAGCCGCCGAGTTGAGCTTGGCTTTCTCCCGCAGTATAACGCCAGCCAGCTC  
AAAGGGTTTGGTATCCTGAAGCCAGAGGACAAGGAAACCCTGAAGAAGCAGCTCCCTGCC  
GTCAAGAGCGAAGGGAAGAGGAAAGGAGATGAGGTGGATGGAGGTGGCGTGGTGGCCAAG  
AAGAAACAGAAAAAGGAAAAAGACAAGGAAACCAAGCAGGAGAAGCTGCTCAAGGAGCAG  
ACAGAGTTGATCTGGAACATCAAAGATGAGCTGAAGAAAGCCTGCTCCACGAACGACTTG  
AAAGAGCTGCTTATAGCCAACAAGCAAGCCGTGCCTTCTGGGGAGACGGCGATTTTGGAT  
AGAGTGGCCGATGGAATGGCCTTTGGAGCACTTCTTCCCTGCGAGGAGTGCAAAGGGCAG  
TTCGTCTTCAAGAGCGATGCCTACTATTGCTCCGGGGACATCACGGCCTGGACCAAATGT  
GTGGCCAAGACCCAGACGCCAACAGGAAGGAATGGACCATCCCGAAGGAGTTCAAGGAA  
ATCCCGTACCTAAAGAAATTTAAGTGCAAAAAGCAGGACCGAGCCTTACCCCAGAGGCC  
AGCACCCCTGTGATCGTGCTTTGCCCTCAACGACCCCTGCTCCCCCACGCTGAACTCG  
ACTGTGCCGGCAGATAAGCCGTTGTCCAACATGAAGATACTGACTCTTGGGAAGCTTTCC  
AGAAACAAAGAAGAGATGAAGGCCACGATTGAGGAGCTCGGGGGGAAATTGACGGGTTCC  
GCCAACAAAGCCTCCCTGTGCATCAGTACTCAAAGGAAGTGGAGAAGATGAACAAGAAA  
ATGGAGGAGGTGAAGGAGGCTGGAGTGCGGGTGGTTTCTGAGGAGTTCCTCAAGGATGT  
GCCGCTCGGGCAAGAGGCTCCAGGAGCTGCTGACCCTGCACGCCTTGTACCCTGGGGG  
GCTGAGGTGAAGCAAGAGCACCCGAGGTGCCACTGAGCGGGAAGTCAGGCGGCCCTGTCT  
TCCACCAAGAGTGCGGGCAAGATCAAGGAGGAGGAAGGAGCCAGCAAGTCCGAAAAGAAG  
ATGAAGTTAACCGTAAAAGGAGGCGCAGCTGTGCATCCGGATTCTGGCTTGGAGGACTCG  
GCTCACGTCTTTGAAAAGGGCGGGAAAATCTTACGCGCCACCCTCGGCCTGGTGGACATC  
GTCCGAGGAACCAATTCATATTATAAACTGCAGCTCCTGGAGGATGACCGAGAAATCAGC  
AGGTACTGGGTGTTTAGATCCTGGGGCCGCGTGGGCACTGAGATTGGCAGTAACAAGCTG  
GAGCAGATGCCATCCAAAGAAGATGCCATTGAACACTTTCTGAACTTGATGAAGAGAAA  
ACCGGCAACTCCTGGCATTCCAAGAACTTTACTAAATATCCCAAAAATTCTATCCTCTA  
GAAATCGATTATGGCAGGATGAGGAGGCAGTGAAGAACTGACTGTCAGCGCCGGCACC  
AAGTCCAAGCTCCCTAAGCCGTTTCAGAACCTCATCAAGATGATCTTTGACGTGGAGAGC  
ATGAAGAAGGCCATGGTGAATTCGAGATTGACCTCCAGAAGATGCCACTGGGAAAGCTA  
AGTAAGAGGCAGATCCAGAACGCTTACTCTATCCTGAACGAGGTCCAGCAGGCCGTGTCT  
GAGGGAGGCAGCGACTCTCAGATCCTGGACCTGTCCAACCGCTTCTACACACTGATCCCC  
CACGACTTTGGGATGAAAAAGCCTCCGCTTCTGAACAACATGGACTGTGTGCAGGCCAAG  
GTAGAGATGTTGGACAACCTGCTGGACATCGAGGTGGCCTATAGCCTGCTCCGGGGTGGC  
TCTGAAGATGGTGACAAGGACCCATCGATGTCAACTATGAGAAGCTCAAAACGGACATC  
AAGGTGGTTGACAAAGACTCAGAAGAAGCCAGAATCATTAGGGAGTACGTCAAGAACACT  
CATGCCACAACACAATGCTTATGACCTGCAAGTTGTTGATATCTTCAAATTGAGCGG  
GAAGGAGAGAGTCAGCGCTATAAGCCATTCAAGCAGCTTCACAACCGGCAGCTGCTCTGG  
CACGGTCCCGGGCTACAACTTTGCTGGTATCCTGTCCAAGGCCTGCGAATCGCCCC  
CCTGAGGCTCCCGTGACCGGCTACATGTTTGGAAAAGGCATCTACTTCGCGGACATGGTC

TCCAAGAGTGCCAACACTACTGCCACACATCTCAGGGAGATCCTATCGGCTTGATCCTGCTG  
GGAGAAGTGGCCCTCGGAAACATGTATGAGCTGAAGAACGCATCCCATATCAGCAAGCTG  
CCCAAAGGGAAGCACAGCGTCAAAGTTTTGGGCAAACTGCCCTGATCCCAGTGCCAGC  
ATCACCTCGATGGGGTGGAGTTCCCTGGGACTGGGATTCGTGCGGGGTCAGCGAC  
ACTTGCCTACTGTATAACGAATACATCGTCTATGATATTGCTCAGGTAAATCTGAAGTAT  
CTGCTGAAACTGAAGTTCAACTTTAAGACGTCGCTGTGG

>rabbit\_PARP1

ATGGCGGAGTCTTCGGACAAGCTCTACCGAGTGGAATACGCCAAGAGCGGGCGCGCCTCC  
TGCAAGAAATGCAGCGAGAGCATCCCCAAGGACTCGCTCCGGATGGCCATCATGGTGCAG  
TCGCCATGTTTCGATGGGAAGGTCCCACACTGGTACCACTTCTCCTGCTTCTGGAAGGTG  
GGCCACTCCATCCGGCAGCCCGACAGCGAGGTGGATGGCTTCTCTGAGCTGCGGTGGGAT  
GACCAGCAGAAAGTCAAGAAGACGGCGGAGGCCGGCGGGGTGACTGGCAAAGGCCAGGAT  
GGAACCGGCAGCAAACAGAGAAGACGCTGGGTGACTTTGCAGCCGAGTACGCCAAGTCC  
AACAGAAGCACGTGCAAGGGGTGCATGGAGAAGATAGAAAAGGGTCAGGTGCGCCTTTCC  
AAGAAGATGCTGGACCCAGAGAAGCCACAGCTGGGCATGATCGACCGCTGGTACCACCCG  
AACTGCTTTGTCAAGAACAGGGAGGAGCTGGGTTTCCGGCCCGAGTACAGTGCAAGTCAG  
CTCAAGGGCTTCAGCCTTCTCTCTGCAGAGGATAAAGAGGCCCTGAAGAAGCAGCTCCCG  
GGGGTCAAGAGTGAAGGAAAAAGGAAAGGGATGAGGTGGATGGAATGGATGAAGTGGCC  
AAGAAAAATCTAAAAAAGAAAAAGACAAGGAGAGTAAGCTTGAAAAGGCCCTCAAGGCC  
CAGAACGACCTGATCTGGAACATCAAGGATGAACTAAAGAAAGTATGTTTCGACCAATGAC  
CTGAAAGAGCTGCTCATCTTCAACAAGCAGCAAGTGCCTTCCGGGGAGTCGGCGATCTTG  
GACCGGGTAGCTGATGGCATGGTGTTCGGTGCCTCCTTCCCTGCGAGGAGTGCTCGGGC  
CAGCTGGTCTTCAAGAGCGATGCTTACTACTGTACCGGGGACGTCACTGCCTGGACCAAG  
TGTATGGTCAAGACACAGACACCCAACCGAAGGAATGGGTGACCCCAAAGGAATTCCGG  
GAAATCTTTACCTCAAGAAATTGAAGATCAAAAAGCAGGACCGCATATTCACCCAGAG  
AGCAGCGCCCCGGCAGCAGCGGCACCCCTCCCTCCACAGCCTCGGCCCCCGCTTCTGTG  
ACTCCCTCCGCTCCAGCAGATAAGCCACTGTCCAACATGAAGATCCTGACCCTTGGGAAA  
CTGTCCCGGAACAAGGACGAAGTGAAGGCCGCCGTCGAGAACTCGGGGGGAAGGTGACG  
GGGACAGCCAGCAAGGCCTCGCTGTGCATCAGCACCCAGAAGGAAGTGGAAAAGATGAAT  
AAGAAAATGGAGGAAGTCAGAGAAGCCAACGTCCGCGTCGTGGCTGAGGACTTCTCCAG  
GATGTCTCCAGTCCGCCAAGAGCCTGCAGGAGTTGCTCTCAGCGCACATCTTATCCCC  
TGGGGGGCCGAGGTGAAGGCAGAGCCTGTTGAAGCAGTGGCCCCAAAACCAAAGTCAGGG  
GCTGCTGTGCCAAGAAGAGCAAGGGACCAGTGGAGGAAGTCCAAGGTATGAACAAATCT  
GAAAAGAGGATGAAATTAAGTCTCAAAGGAGGTGCAGCCGTCGATCCTGATTCTGGTCTG  
GAGCACTCGGCACACGCTCTGGAGAAAGGCGGGAAGGTGTTACAGCGCCACCCTTGGCCTG  
GTGGACATCGTTAAGGGAACCAACTCTATTACAAGCTGCAGCTGCTCGAGGATGACAAG  
GAAAGCAGGTAAGTATTGAGTTCATGGGGTTCGCGTGGGAACCGTGATTGGTAGTAAC  
AAACTGGAGCAGATGCCATCTAAGGAGGATGCCATTGAGCACTTTATGAAATTATATGAA  
GAAAAGACTGGGAACGCCTGGCACTCCAAAACTTCACAAAGTATCCAAAAAGTTCTAT  
CCTCTGGAAGACTATGGCCAGGATGAAGAGGCGGTGAAGAAGCTGACGGTGAGCCCTGGC  
ACCAAGTCGAAGCTCCCCAAGCCGTTCAAGAACTTATTAAGATGATCTTTGACGTGGAA  
AGTATGAAGAAGGCCATGGTGGAGTATGAGATTGACCTTCAGAAGATGCCTCTGGGGAAG  
CTGAGCAAAAAGGCAGATCCAGGCCGCTACTCTATTCTCAACGAGGTCCAGCAGGCGGTG  
TCCAGGGCAGCAGTGAATCTCAGATCCTGGACCTCTCAAACCGCTTCTACACCCTGATC

CCCCGACTTCGGGATGAAGAAGCCCCGCTCCTGAACAACACAGACAGCGTGCAGGCC  
AAGGTGGAAATGCTGGACAACCTCCTGGACATTGAGGTGGCCTACAGTCTGCTCAGGGGT  
GGATCTGATGATAGCAGCAAGGACCCCATCGATGTCAACTATGAGAAGCTCAAAACTGAC  
ATTAAGGTGGTTGACAAAGATTCCGAAGAAGCTGAGGTCATCAGGAAATACGTTAAGAAC  
ACACATGCGACCACGCACAATGCATATGACTTGGAAGTTGTTGATATCTTTAAGATAGAG  
CGTGACGGAGAAAAGCCAACGCTATAAGCCCTCAAGCAGCTTCATAACCGACGGTTGCTG  
TGGCATGGGTCCAGGACCACCAACTTTGCTGGGATCCTGTCCCAGGGGCTGCGGATAGCC  
CCACCTGAAGCGCCTGTGACGGGCTACATGTTTGGTAAAGGGATCTATTTGCGCGACATG  
GTCTCCAAGAGTGCCAACTACTGCCACACGTCTCAGGGAGACCCCATCGGTTTGATCCTG  
TTGGGAGAAGTTGCCCTTGAAACATGTATGAACTGAAGCAAGCTTCGCATATCAGCAAG  
TTACCCAAGGGCAAGCACAGTGTGAAAGGTTTGGGCAAACCACTCCTGACCCTTCTGCT  
AGTATTACTCTGGATGGTGTGGAGGTTCTCTGGGGACCGGTATCTCGTCTGGTGTTAAC  
GACACCTGTCTGCTGTATAACGAGTACATTGTCTACGATATTGCTCAGGTAAATCTGAAG  
TATCTGCTGAAACTGAAGTTAACTTCAAGACATCGCTGTGG

>tilapia\_PARP1

ATGGCAGACTCACAAGAGGACAAGCTGTACAGGGTGAATACGCCAAAAGTGGCCGCGCG  
TCGTGCAAAAATGCAAAGAAAACATAGCTAAAGACTCGCTGAGGATGGCTATCATGGTG  
CAGTCTCCCATGTTTATGAGGGAAGGTCCCCACTGGCACCCTTCTCCTGCTTCTGGCAG  
CGAGCATCAGCTCAGTCCACCGCTGATATCGCTGGGTTTTCTGATCTCCGCTGGGATGAC  
CAACAGAAGGTGAAAAAGGCCATTGAAAGCGGTGGCGCCGCAGGAGGGAAAGGTGACCAG  
AAGGGTGGCGCTAAAGGCGAGAAGACGCTGAATGACTTTGCTGTGGAATATGCCAAGTCA  
AACCGCAGCACATGCAAAGGCTGTGAGCAGAAAATAGAAAAGGATCAGATTCGTGTGTCC  
AAGAAAATGTGGACCCCGAGAAGCCACAGCTGGGTCTTATTGACCGCTGGTACCACACG  
GCGTGTTCGTGAGCCGAGGGAGGAGCTGGTTTTCAAGCCGAGTACAGCGCCGCTCAG  
CTGAAGGGATTCAATGCACTGCGGGCAGAGGACAAAGAAGAGCTCAAGAAGAGGCTCCCT  
GCTGTCAAATCTGAGGGGAAGCGGAAAATGATGATGTTGATGGAGCGTCAAAGAAACAG  
AAGACAGAAGAAGACGACAAGAAGAAAAGCTAGAAGAACAGTTAAAGAATCAAAGTCAG  
CTTATTTGGGAATTAAGGACAAGCTGCGAAAATATTGTTCAAGCAATGATATGAAGGAA  
CTGCTGATTGCAAATGGCCAGGAAGTCCCTCTGGAGAGACCAATCTGGTTGACAGCCTG  
GCCGATGGTATGGCCTTTGGTGCTCTCGAGGCCTGTAAGGAGTGCCAGGGCCAGCTGGTG  
TTTAAGGGTGACGCCTATTACTGCACAGGAAACATTTCTGCCTGGACAAAGTGTGTGTT  
AAAACCACAACACCCTACGCAAAGACTGGGTCAATCCAAGGAATTCCACGAAGTTTCT  
TTTCTGAAAAAATTCAAATCAAGCGGCAGGACAGGGTTTACCCCAAAGAGGCTCCCACG  
AAAACCCTGGCAGCGGCCAAATCAGAACCACTACCGAGTGCATCCAGCGCTCCGACCGAG  
ACCCTGCCACAGGGAGCACCTTCAAGACAAGCCTTACTGGCATGAAGCTGCTGACTGTG  
GGCAAGCTGACTAAGAACAAGGATGATCTGAAAATGCTGTGGAAGAGCTTGGTGGAAAG  
ATTACCGCACAGTCAACAAGGCCTCTTTGTGTATAAGCACAAGAAGGAGGTGGAGAAG  
ATGAGTAAGAAGATGGAGGAAGTAAGGGACGCTGGCGTGCCTGTTGTTGAGGATTC  
CTCACTGACATCAAGTCATCGGGCAAAGCCCTCCAGGAGCTGGTCTCCCTGCACGCCATC  
TCCCCCTGGGGGGCAGAGGTTAAAGTCAAGCTCAGGCTCCATCTGTGGCCTCCAAGTCT  
GGAACACAGGCTACTAAGAGCACAGGGAGGGTAAAGAGGAGGAAGGTGGTAGCAAATCC  
AAGAAGATGAACTCACAGTTAAAGGTGGAGCTGCTGTGGATCCAGACTCAGGGCTGGAG  
AACAGTGCCCATGTCTTGAGCAGAATGGGAAGATGTACAGTGCTACACTCGGTCTTGTG  
GATATTATCAGAGGAACTAACTTACTATAAACTGCAGCTGCTTGAGGATGATGTACAG

AAACGGTACTGGGTGTTTCAGGTCATGGGGCAGAGTGGGTACCACTATCGGAGGAAACAAG  
TTGGACAAATCCATGACAAGAACTCTGCTGTGGATAATTTCTGGGTGTGTACAAGGAG  
AAGACTGGCAATGATTGGGGCTCGTCCAATTCACCAAATATCCCAATAAGTTCTACCCG  
CTGGAGATTGACTACGGACAGGATGAGGAGGCAGTGAAGAGGCTGACAGCCACGGCTGGC  
ACCAAGTCAAAGCTGGCCAAACCTGTCCAGGAGCTAATCAAGATGATCTTTGATGTAGAA  
AGCATGAAGAAGGCCATGGTCGAGTTTGAGATTGACCTCCAGAAGATGCCACTTGGTAAG  
CTGAGCAAGAGGCCAAATCCAGAGTGCCTATGCTCTCCTCACTGAAGTACAGCAGGCTGTG  
TCAGAGTGTGTGTCTGAGGCGCAGATACTGGATCTCTCCAATCGCTTTTATACTCTAATA  
CCTCATGACTTTGGCATGAAGAAGCCTCCACTGCTCAACAACCTGGACTACATTCAAGCT  
AAAGTTCAGATGTTGGACAACCTGTTGGATATTGAAGTGGCTTACAGCTTACTGAGAGGA  
GGAGCCCAGGACAATGAGAAAAGACCCCATCGACATAAACTATGAGAACCTCAAGACAAAAG  
ATTGAGGTTGTTGACAAGACCACAAGTGAAGCTGAGATCATCTTGCAATACGTTAAGAAC  
ACCCACGCTGCTACACACAACACGTACACACTGGAAGTACAAGAGATATTTAAAATTGTC  
AGAGAGGGGAGAGCACCAGCGATATCGTCCATTCGAGGAGCTTACAATCGCCAGCTATTG  
TGGCACGGCTCTCGCACCACTACGCCGGTATTCTGTCTCAGGGTCTCCGCATTGCC  
CCTCCAGAGGCCCCAGTGACTGGTTACATGTTGGCAAAGGTGTGTACTTTGCTGACATG  
GTGTCCAAGAGTGCAAATACTGCCACACCTCCAGTCAGATCCTGTAGGCCTCATTCTG  
CTCGGCGAGGTTGCTCTAGGAAACATGCATGAACTGAAGAAGGCTTCTCATATTACAAAA  
TTACCTAAGGGCAAGCACAGTGTTAAAGGTTTGGGTAGAACTGCTCCCGATCCAAATGCC  
ACTGTCACTTTAAATGGAGTGCAAGTGCCTCTGGGAAAAGGAGTCCACACTAATATTGAT  
GACACAAGTCTGCTGTACAACGAGTACATCGTGTATGATGTAGCACAGGTAAATCTGAAG  
TATCTTCTGAAGATCAAGTTTAACTACCAGACATCCCTGTGG

>worm\_PARP1

ATGATTCATTCCAACGAGCCACTGCCCTACGCTATCGAATATGCAAAGTCTGGCCGGTGC  
AATTGTAAAACATGCAAAAAGAATATCGCGTTGGATCAATTGAGAATGTCAATGAATCGC  
CCGTCAACATTCTTCGATGGAAACATGGATTCGTGGTTTTCACTACAATTGCTTCTGGATA  
AAAATGATTCGCGGCCGAGATGACATCAATATAAGCTCAATCCGAGGAGTGCATTGGCTT  
CGCTGGGAAGATCAGGAAAAGCTTCGCCAGGAAATTCAACACTTTAAAACCGCATCGCCA  
CCGACTCTGACACCCCTGTGCTCTACCACTACCGTCATTTTGTCCACAATAAAAACCGAA  
AAATCGTTGTCAAATCGTGGGAAATGTGGAAAATGCGGCCAAAATTCGAGCGCGGGCGAA  
ATCAAGGCTCATAACAAGGGAAAAGCCAACCATTTCAAGTGTCTTCTGCAGGAATTTGAT  
AAAATTTCCGGCACCGTTGAGGATATTCTGGCTGGGCGGATTATGAGGAGAACTTTAAA  
ATTAAGGCGGTTGGGGAGTATGTGGAGGCTTTAGCTGCGAAAAGGCGATCCACGGAGCCA  
GCTACCCCGGCTTCTGCCTCTCCAACACCACAGAAGCTGAAACTCCAGTTTTATCTGCA  
GAAGGATCCCCGAAAAGCTCCAATAAACGTCCGGCAAGCTCTGAAATCATTGAAATCGAC  
GGTGAAGGGAATCCAGATGAGAATGATTTTGCGAAGAAAAGACGAATGAAGAAGGAAGCA  
AGATTGATGGAGGTTCAGAAGAAGCGAATGAAGAAACAATCCGATCTTCTCTGGGAATAC  
CGCCAGATCTTCGAAAGAATGCCGTACACCGACAAAATCTCTATATTACGAGAAAACGAG  
CAAGACATTCCAGAAGGACACGATCCGACTGCACAAGTAATCGAACGCCTAGTGGATAAT  
GCCCTATTCGGATGCCCAATCATTTGCCAAACATGTTCAAATGGAAAAATTGTCTATAAT  
TCATCATGCCGCACATATGTCTGCACTGGATATGCTACAGAATACTCGAAATGTACTTAT  
GAATCAAAGAATCCAATTCGAACTCCATTGAAAGTTTCTCACCGATTAAGTAAAAGCAT  
AAGCTTCAAGATATTGATTCAATCAAATGAGTGAACGACTTTATATAGGAGAAGAGGAT  
GGAGAATCTGTAGTGAATAATGATAAAAAGAAAGTCGAAAGGTGGTACTCGTGGTGAACAA

TTCATTTATGCGGCTGAAGCATTTCGATTTCGACTAACAATGTTCCGATAAAAAGTCGGCGAT  
CTCACATCAACCAATACTCATATTATAAAAAAGGAACAGTTGTTGATGCGAAATTCGCA  
CTGGCCGATCGTTGTCATGTATTCAAAAATGAGATTGATGGAAGTCTCTATCAGGCGACA  
CTCTCGTTTACTGATCTTACACAGAATAAGAATTCGTATTATAAGATTCAACTGTTGAAG  
GATGATCAGAGAGAAAATACTACTACGTCTTCCGTTCTTGGGGTCGAGTTGGCACAGAAGTC  
GGCGGAAATAAGCATGAATCATAACAGTAATCAAATGAAGCGATTCTCAAATCCAGGAT  
GTTTTCCACGAAAAAACGAAGAACGATTGGATTATAGAAAACATTTCCGCAAAATGCC  
GGAATGTTTCAGCTACGTGGAGACGGATTACTCGGAATTTGCACAAATAACGGACACAGAA  
ATCACTCCAGGATCAAAAATCTACTTCCAAAATCTGTAAAAGAAGTTGTAATGTCAATT  
TTCCGACGTTGAAAACATGAAATCTGCATTAATAATCGTTTGAAATGGATGTGAATAAATG  
CCGCTTGGAAGATTATCACATAATCAAATCAATTTGGCTTTTGAAGTTCTCAATGATATT  
AGTGATTTGCTTGCAAGCTGCCATTGATGCTTCGAGAATTTTGGATTTTAGTAACAAG  
TTCTACACGATTATTCGCATAATTTTGAATGCGGGTGCCCGAGCCGATTGATAGTTTT  
CATAAAATTAAGGAGAAAAACAACATGCTCAACGCCCTTCTCGACATCAAATTCGCGTAT  
GATCAAATCAGCGGTGGAGATGTTCCAGCATCAACGTCATTGGGTATTGATCCAGTTGAT  
ATTAATTATCAAAAATTGAAATGTATTATGGAACCACTACAACAAGGCTGTGATGATTGG  
AATATGATTCATCAATATTTGAAGAATACTACGGAGCCACTCATGATTTGAAAGTCGAG  
CTGATTGATATTCTAAAATGAACCGAGACAATGAATCGTCGAAATTCAAACGACACATC  
GGAAATCGACGTCTTTTGTGGCACGGATCAGGAAAAATGAATTCGCCGGAATTTGGGT  
CAAGGACTTCGAATTGCGCCACCGGAGGCTCCAGTTTCTGGATATATGTTCCGAAAGGGC  
GTCTATTTTGTGATATGTTTCAGCAAAAGTTTCTTCTATTGCAGGGCCAACGCCAAAGAA  
GAAGCATATCTTCTGCTCTGTGACGTGGCACTCGGCAACGTGCAACAGTTGATGGCTTCG  
AAGAATGTTTCGAGACAAACTCTGCCAGCAGGCTTCCAGTCTGTGCAGGGACTAGGCCG  
CAATGTCCACGAGAAATTGGAAGTTACAATCATCCGGATGGTTATACCATTCCACTGGGC  
CTCACTTACATGCAACTTCAAGGAAAACAGGATGTGATTATCACTTGCTTTATAATGAA  
TTCATTGTGTATGATGTCGATCAAATTCAGCTCAAGTATCTCGTCCGTGTCAAAATGCAC  
CATGCTCGTCATCTT

>zebra fish\_PARP1

ATGGCCGACTCACAGGACGACAAGCTGTACAAAGCCGAATATGCAAAAAGCGGACGCGCC  
TCATGCAAGAAATGCAAAGACAACATTGCTAAGGACTCGCTGAGGATGGCCATCATGGTG  
CAGTCTCCCATGTTTATGATGGCAAAGTCCCTCACTGGCACCATTTTTCTTGCTTTTGGCTC  
CGGGCCGAGTTTCACTCTCCTTCTGATATATCTGGATTTACTGACCTCCGCTGGGATGAC  
CAAGAGAAAAGTGAAGACAGCCATTGAGAGTGGAGGTGCTACAGGAGGGAAAGGAGGACAG  
AAGGGAGCGGCTAAAGGAGAGAAGACGCTGAATGACTTTGCAGTGGAGTATGCTAAATCC  
AACAGAAGCACCTGCAAGGGCTGCGATCAGAAAATTGAAAAGGACCAGATCCGTGTGTGCG  
AAGAAGACTGTGGACCCAGAGAAACCTCAGCTTGGTCTAATCGATCGCTGGTACCACACC  
GGCTGCTTTGTGAGTCGTCGGGAGGAAGTATTTAAACCAGAGTACAGCGCTGCCAG  
CTCAAAGGATTCGAGTTTCTACGAGATGAAGACAAAGAGGAGCTGAAGAAACGGCTTCTCT  
GCTGTGAAGAGCGAAGGAAAGAGAAAAGCTGATGAAGTAGATGGAGGAGTCTCTAAAAAA  
CAGAAGAAAAGAAGATGAAAAACTAGAGCAGAATCTGAAGGATCAAAGCCAGCTGATCTGG  
GGAATTAAGGACAAGCTGAAGAAGTTCTGCTCCATCAATGACATGAAGGAACTGCTAATT  
GCTAACAGTCAGGAAGTTCTTCTGGGAGTCAAATATTGTGGATCGACTATCAGACTGC  
ATGGCATTGGGTCCCTGAAGCCTTGTGAGACTTGCAAAGGGCAGCTTGTGTTTAAAAGT  
GATGCGTATTACTGTACTGGAGACATCTCTCGTGGACTAAATGTGTATTCAAGACTCAG

ACGCCTGATCGCAAAGACTGGGTCACCCCTAAGGAGTTCAGTGAGATCCCGTTCCTGAAG  
AAGTTTAAGTTCAAGCGACAGGACCGTGTGTTTCTAAAGACGCTCCTCCCGTGTGCC  
ACTCCATCATCTGGTTCTACCACTTCAGCTGCCACAAGTGTGTCCAGCGCCAGTAAAAAC  
CTCACTGAGGCACCTGCAGATAAGCCTCTGACTGGAATGAAGCTCCTGGCTGTGGGAAAG  
CTCAGTAAGAACAAAGATGATCTGAAGAAATTTGTGGAAGATCTGGGAGGAAAAATCACA  
GGCACGGCCAGCAAAGCTGCTCTCTGCATCAGCAGCAAGAAGGAGATTGAGAAGATGAGT  
AAGAAAATGGAGGAGGTGAGAGACGCAGGTGTCCGCGTGGTGGCTGATGATTTCTTACT  
GACATCAAGGAGTCCGGCAAGGCCCTTCAGGAGCTCATCTCTCTGCATGCCATTTCCCCC  
TGGGGCGCTGAAGTTAAAGTCGAGGCCCGGCTGCAGCCGCGGCCACCAAATCCACCGGA  
GCTCATTCTCAAAGAGCACCGGCAAAGTCAAAGAGGAGGAAGGTGGAAGCAAATCAAAG  
AAAATGAAGCTGACAGTGAAAGGAGGAGCTGCAGTAGATCCAGATTCAGGTCTGAAAAAC  
TGTGCTCATGTTCTGGAACAGAATGGAAAGATTTACAGCGCCACACTGGGTCTCGTGGAC  
ATCGTCAGAGGGACAAACTCATACTACAACTACAGCTGCTGGAGGATGACGTTCAAAG  
CGGTAAGTGGGTGTTTAGATCGTGGGGTCGAGTCGGGACCACCATTGGAGGAAACAAATTG  
GACAAGTTTTACGATAAGAACTCTGCTATGGACAATTTCTGTGGTGTGTATGAGGAAAAG  
ACAGGGAATGCTTGGGCCTCCAGCAACTTCACAAAGTACCCCAATAAGTTTTACCCTCTG  
GAGATTGACTACGGACAGGATGAGGAGGCTGTGAAGAAGTTGACTCAAAGTGCAGGTGCC  
AAATCTCAGCTGGAAAAACCTGTGCAAGACCTCATCCGAATGATCTTCGATGTGGAGAGC  
ATGAAGAAAGCCATGGTGGAGTTTGAGATTGACTTGCAGAAGATGCCTTTGGGAAAATA  
AGCAAGCGACAGATCCAGAGTGCTTATTCCTTCTAAGCGAAGTTCAGCAGGCTGTGGCA  
GATAGCTCCTCAGAATCACTGATCCTAGATCTGTCTAATCGCTTCTACACACTGATACCG  
CACGACTTCGGCATGAAGAAACCACCACTATTGAGTAATGTGGATTACATCCAGCAAAAG  
GTGCAGATGCTGGACAACCTTTTGGACATCGAGGTGGCCTACAGCCTGCTTCGGGGAGGA  
GTGGAGAACAACGAAAAAGATCCATTGACATCAACTATGAGAACTCAAACCAAAT  
GAGGTCGTCGACAAGTCTTCACATGAGGCTCAGCTTATCCTTCAATATGTGAAGAACACA  
CATGCTGCTACTCACAACACCTACACACTGGATGTTGAGGAGATCTTTAAGATTGAGAGG  
GAGGGCGAGTATCAGCGTTATCGCCCCTTCAAAGAGTTACCCAACCGCCAGCTGCTGTGG  
CACGGCTCGCGCACCACCAACTATGCTGGTATTCTGTCTCAGGGTCTCCGCATCGCTCCT  
CCGGAGGCCCCAGTGACGGGTTACATGTTTGGCAAAGGTGTTTACTTTGCTGATATGGTG  
TCGAAGAGTGCCAACACTACTGCCACACGTCTCAGGCTGATCCTGTGGGCCTATTCTGTTA  
GGAGAGGTTGCATTAGGGAACATGCATGAACTGAAGAAAGCCTCACACATTACAAAGCTA  
CCAAAGGGTAAACACAGTGAAAAGGTTTGGGAAGAAGTGCTCCAGACCCAAGAGCTACA  
GTATCTCTCAATGGAGTGACATTCCTCTGGGCAAAGGCATGAACACAAATATTGATGAC  
ACAAGTCTGCTCTACAACGAGTACATCGTTTATGATGTTTCTCAGGTTAACCTGAAATAC  
CTGCTGAAGATCCGCTTCAACTATCAGACGTCTCTGTGG

>panda\_PARP1

ATGGCAGGGCAGGATCTGCGCATGCGCCTGTGCGCCATGTTTGTGGAAGTCCCACAC  
TGGTACCACTTCTCCTGCTTCTGGAAGGTGGCCACTGCATCCGACACCCCGACGTAGAG  
GTGGACGGCTTCTCTGAGCTCAGGTGGGATGACCAGCAGAAAGTCAAGAAGACCGCGGAG  
GCTGGAGGCGTCAAGGCAAAGGCCAGGATGGAGGCGGCGCAAGACGGACAAGACGCTG  
GCGGACTTCGCGGCCGAGTATGCAAGTCCAACAGAAGCACCTGCAAGGGCTGCATGGAG  
AAGATAGAGAAGGGCCAGATACGCCTGTCCAAGAAGATGCTGGACCCAGAGAAGCCCCAG  
CTGGGCATGATCGACCGTGGTACCACCCGAACTGCTTTGTGAAGAACAGGGAGGAGCTG  
GGCTTCCGGCCCGAGTACAGCGCCAGCCAGCTCAAGGGCTTTGGCCTCCTCACCGCCGAA

GATAAGGAAACCTGAAGAAGCAGCTCCCGGGAGTCAAGAGTGAAGGAAAGAGGAAGGGC  
GACGAGGTGGATGGGATGGATGAAGTGGCCAAGAAGAAATCTAAAAAAGAAAAGGACAAA  
GATAGTAAGCTTGAGAGGGCCCTCAAGGCCAGAACGAGCTGATCTGGAACATCAAGGAC  
GAGCTAAAGAAAGCGTGTTCACAAACGACCTGAAAGAGCTGCTCATCTTCAACAAGCAG  
CAAGTGCCCTCCGGGGAGTCGGCGATCTTGACCCTGGCGGACGGCATGGTGTTCGGT  
GCCCTCTCCCTGTGAGGAGTGTCTGGGCCAGCTGGTCTTCAAGAGCGACGCTACTAC  
TGTACGGGCGACGTCCTGACCAAGTGTATGATCAAGACCCAGACCCCGAGCCGG  
AAGGACTGGGTGACCCCAAAGGAGTTCGAGAAATTTCTACCTCAAAAAATTGAAGATC  
AAAAGGCAGGACCGAATATTTCCCCCGAGACCAGTGGCCAGTGGCCGCGGTGGCCCTG  
CCGTCCACAGCCTCGGCGCCCGCTGTGTGAACAGCTCCACTCCGCCAGATAAGCCGTTG  
TCCAGCATGAAGATCTGACTCTCGGGAAACTCTCCCGGAACAAGGATGAGGTGAAGGCC  
ATGATCGAGAAACTCGGGGGGAAGTTGACGGGCACAGCCAACAAGGCCTCCCTGTGCATC  
AGTACCAAAAAGGAGGTGGAGAAGATGAGCAAGAAGATGGAGGAGGTGCGAGAGGCTGGC  
ATCCGCGTGGTGTCCGAGGACTTCTCCGGGACTTGTCCGACTCCACCGGGAGCCTCCAG  
GACTTGCTTGGCGCCACGTCCTGGCCCCCTGGGGCGCTGAGGTGAAGGCCGAGCCGGTG  
GAGCCACGGAGCCCGCGGCCCGAAAGCAAAGTCGGGGGCTGCGCTTCCAAGAAGAGC  
AAGGGCCCCGCAAGGAGGAAGGCATCAACAAATCTGAGAAGAGAATGAAATTAACTCTC  
AAAGGTGGAGCTGCTGTTGATCCGGACTCGGGTCTGGAACACTCCGCGCACGTCCTGGAG  
AAAGGTGGGAAGGTGTTACGCGCCACCCTCGGCCTGGTGGACATCGTGAAGGGAACCAAC  
TCCTATTACAAGCTGCAGCTCCTGGAGGATGACAAAGAAAGCCGGTACTGGATCTTCAGG  
TCGTGGGGCCGCTGGGCACAGTGATCGGCAGTAACAAGCTGGAACGGGTGCCGTCCAAG  
GAGGATGCCATCGAGCACTTCATGAAACTGTATGAAGAGAAAACCGGGAACGCCTGGCAC  
TCCAAGAACTTCACGAAGTATCCAAAAAGTTCTACCCCTGGAGATTGACTACGGTCAG  
GACGAGGAGGCGGTAAAGAAGCTGACGGTGAACCCCGGCACCAAGTCCAAGTCCCAAG  
CCAGTGCAGGAGCTCATTAAAGATGATCTTCGACGTGGAGAGTATGAAGAAAGCCATGGTG  
GAATACGAGATTGACCTTCAGAAGATGCCCTTGGGAAAGCTGAGCAAGAGGCAGATCCAG  
GCGGCGTACTCCATCTTAGTGAGGTGCAGCAGGCGGTGTCCAGGGCAGCAGTGACTCC  
CAGATCCTGGATCTCTCAAATCGCTTACACCCTGATCCCCACGACTTTGGGATGAGG  
AAGCCCCACTCCTGAATAACGCGGACTGTGTGCAGGCCAAGGTGGAGATGCTGGACAAC  
CTGCTGGACATCGAGGTGGCCTACAGTCTGCTCAGGGGAGGCTCTGATGACAGCAGCAAG  
GACCCCATCGACGTCAACTATGAGAAGCTGAAGACTGACATTAAGGTGGTGGACAGGGAT  
TCGGAGGAAGCGGAGACCATCAGGAAGTACGTTAAGAACACTCACGCGACCACACACAAC  
GCGTACGACCTGGAAGTCGTTGACATTTTAAAGATCGAGCGCGAAGGCGAGAGCCAGCGC  
TACAAGCCGTTCCGGCAGCTGCATAACCGCAGGCTGCTGTGGCACGGGTCCAGGACCACC  
AACTTCGCCGGGATCCTGTCCAGGGCCTCCGGATAGCCCCGCTGAGGCGCCCGTGACA  
GGCTACATGTTTGGGAAAGGGATCTATTTCCGCCGACATGGTCTCCAAGAGCGCCAACACTAC  
TGCCACACATCCAGGCCGACCCATCGGCCTGATCCTGCTGGGAGAAGTTGCCCTCGGA  
AACATGTACGAACTAAAGCACGCTTACACATCAGCAAGCTACCCAAGGGCAAGCACAGC  
GTCAAAGGTTTGGGCAAGACGACCCCTGACCCTCAGCCAGCATCACTATGGACGGCGTG  
GAAGTCCCCCTGGGGACCGGGATTTCTCCGGCGTTAACGACACCTGCCTGCTCTATAAC  
GAGTACATCGTCTACGACATCGCTCAGGTAAATCTGAGATACCTGCTGAAGCTCAGGTT  
AACTTCAAGACGTCCCTGTGG

>Elephant\_PARP1

ATGAGAGGGGAAACCACCTTTTGTTCCTACGTGGTGGGCTTCCAAGTACCTCCACCTGGG

AAGTGGTGCTTCATCGAGTCACCCATATTCGACGGGAGAGTCCCACACTGGTACCACTTC  
TCCTGCTTCTGGAAGGTTGGCCATACCCTCCCGCACCTGACGTGGATGTGGACGGGTTT  
TCCGAGCTGCGTTGGGATGACCAGCAGAAAAGTCAAGAAGACTGCAGAAGCTGGCGGAGTG  
GCAGGCAAAGGCCAGGATGGAAGTGACAGCAAGCTAGACAAGACACTGGGTGACTTCACC  
GCCGAGTACGCCAAGTCCAACAGAAGCACATGCAAGGGGTGTATGGAGAAGATAGAAAAG  
GGTCACATGCGCCTGTCCAAGAAGATGCTGGACCCGGAGAAGCCACAGATGGGTGTGATC  
GACCGCTGGTACCACCCAACTGCTTCGTCAGAACAGGGAGAAGCTGGGTTTCCGGCCT  
GAGTACAGCGCAAGCCAGATCGCGGGCTTCTCCATCCTCACTCCAGAGGACAGAGAATTC  
CTGAAGAAGCTGTTCCAAAAGTCAAGAGTGAAGGAAAGAGAAGAGGTGATGAAGTGGAT  
GGCAGAGATGAAGGGGGCAAGAAGAAATTTAAAAAAGAAAAAGACAAGGATAGTAAGCTT  
GAAAAGGCCCTCAAGGCTCAGAACGACCTAATCTGGAATATCAAGGACGAGCTAAAGAAG  
GTGTGTTGACGAATGACCTGAAGGAGCTCCTCATCTTCAACAAGCAGCAAGTGCCTTCC  
GGGGAGTCGGCGATCTTGGACCGAGTAGCTGATGGGATAGTGTGGTGGCCCTCCTTCCC  
TGTGAGGAATGCTCAGGCCAGCTGGTCTTCAAGAGCGATGCCTATTACTGTACTGGGGAC  
GTCACTGCCTGGACCAAGTGTATGGTCAGGACACAGACACCCAACCGCAAAGAATGGGTG  
ACCCCAAAGGAATTCGGGAAATCTTTACCTCAAGAACTGAAAATCAAAAAGCAGGAC  
CGCCTGTTCCCCCTGAGGCCAGCGCCCAAGTGGTGGCAGCACCCCCACCGTCCAAAGCC  
ACACCGCCCCCACTGAGAACTCTTCTGCTCCAGCAGATAAACCATGTCCAACATGAAG  
ATCCTCACTCTGGGGAAGCTGTCCCGGAACAAGGAGGAAGTGAAGGCCATGATCGAGAAG  
CTTGGGGGCAAGCTGACAGGAACAGCCAACAAGGCTTCCGTGTGCATCAGCACCAAGAAG  
GAGGTGGAGAAGATGACGAAGAAGATGGAGGAAGTAAAAGAAGCCAACGTTTCGAGTTGTG  
TCTGAGGACTTCTCCAGGATGTCTCAGGCTCCACCAAGAGCCTTCAGGAGCTGCTGTCA  
GTGCACGTCTTGTATCCTGGGGGGCTGCGGTGAAGGTGGAGCCTGCCGAAGTAGTGGCC  
CCAAAAGCAAAGTCTGGGGCTGCGGTCCCCAAGAAGAGCAAGGGCCCCGTCAAGGAGGAA  
GGTGTCAACAAATCTGAAAAGAGAATGAAGTTGACTCTCAAAGGAGGAGCAGCTGTGGAT  
CCTGAGTCTGGTCTGGAACATTCTGCACATGTCTGGAGAAAAGCGGGAAGGTCTTCAGT  
GCCACCCTGGGCTGGTGGACATCGTCAAAGGAACCAACTCTATTACAAGCTACAACCT  
CTGGAGGACGATAAAGAAAAGCAGGTAAGTACTGATATTCAGGTCCTGGGGCCGCGTGGGCACA  
GTGATCGGGAGTAACAACTGGAGCAGATGCCGTCCAAGGAGGATGCCATTGAGCACTTC  
ATGAAATTATATGAAGAAAAAACCGGGAATGCCTGGAATCCAAGAACTTCACGAAGTAT  
CCCAAAAATTCTACCCTCTGGAGATTGACTACGGCCAGGATGAAGAGGCAGTGAAGAAG  
CTGACAGTAAACCCTGGCACCAAGTCCAAGCTTCCAAGCCAGTTCAGGAACTCATTAAAG  
ATGATCTTCGATGTGGAAAGTATGAAGAAGGCCATGGTGGAGTACGAGATTGACCTTCAG  
AAGATGCCCTTGGGGAAGCTGAGCAAACGGCAGATCCAGGCAGCATACTCCATCCTCAGT  
GAGGTCCAGCAGGCGTTGTCCAGGGCAGCAGCGACTCCCAGATCCTGGACCTCTCAAAT  
CGCTTCTACACCCTGATCCCCATGACTTTGGGATGAAGAAGCCTCCACTCCTGAACAAT  
GCAGACAGCGTGCAGGCCAAGGTGAAATGCTGGACAACCTGCTAGACATCGAGGTGGCC  
TACAGTCTGCTCAGGGGTGGCTCTGAGGACAGCAGCAAGGACCCCATCGATGTCAACTAT  
GAGAAGCTCAAACTGAGATTAAGGTGGTTGACAGAGATTCTGAAGAAGCCGAGATCATC  
AGGAAGTACGTTAAGAACAACCTCACGCCACCACACAATGCCTATGACTTGGAAAGTCGTT  
GATATCTTAAAGATAGAGCGTGAAGGGGAGAACCAGCGTTACAAGCCCTTCAGGCAGCTT  
CACAACCGGCAGCTGCTGTGGCACGGCTCCAGGACCACCAACTTTGCTGGAATCCTGTCC  
CAGGGTCTCCGATTGCGCCCCGGAAGCGCCTGTGACAGGCTACATGTTGGTAAAGGA  
ATCTATTCGCCGACATGGTCTCCAAGAGTGCCAACTACTGCCACACATCTCAGGGAGAC



CCAATAGGATTGATCCTCTTGGGAGAAGTTGCTCTTGAAATATGTATGAACTGAAGCAT  
GCGTCACATATCAGCAAGTTACCCAAGGGCAAGCACAGTGTCAAAGGTTTGGGCAAAACG  
ACCCCTGACCCTCAGCTAGTACTCTGGATGGTGTGGAGGTTCTCTTGGGACCGGC  
ATTCATCTGGTGTAAATGACACTAGTCTACTGTATAATGAGTACATCGTCTACGATATT  
GCTCAGGTAAATCTGAAGTATCTGCTAAAACGAAATTCAATTTAAGACGTCCCTCTGG  
>turkey\_PARP1  
ATGTTTGATGGCAAAGTCCCTCACTGGCACCCTACAGCTGCTTCTGGAAGCGGGCGCGG  
ATCGTGTCCACACGGACATCGATGGCTTCCCTGAGCTCCGCTGGGAGGACCAGGAGAAA  
ATCAAGAAGGCCATTGAACTGGAGGCCCTGGAGGAGGAAAAGGAGGGGACCAGGAAGGA  
GGTGGCAAGGCTGAGAAGAGCCTAACTGACTTTGCTGCAGAGTATGCCAAGTCTAACAGG  
AGTACTTGCAAAGGTTGTGAGCAGAAAATAGAAAAGGGCCAGATTCGGATTTCCAAGAAG  
ATGGTGCATCCCGAAAAACCACAGCTGGGGATGATCGATAACTGGTACCACCCGACTGC  
TTTGTGAGCCGCGGGCAGAGCTGGGCTTCTCCAGCATATGGGGCCACCCAGCTCCTG  
GGTTTCAGCATCTTAAAAGCTGAAGATAAAGAACTCTGAAGAAGCAACTACCGGCTGCC  
AAGACTGAAGGAAAGAGAAAAGGAGAAGAGGTAGATGGAAATGTGATTGCAAAAAGAAA  
TCAAAAAGAAAAGAAAAGAATCAAAGCAGGAAAAACAGCTGAAGGAGCAGACAGAG  
CTGATCTGGGGCATCAAGGATGAGCTGAGGAAGGTCTGCTCCACCAATGACCTGAAAGAG  
CTGCTGATTGCCAACAAGCAGGAGGTGCCTTCAGGGGAGAATGCAATTTTGGACCGAGTG  
GCAGATGGGATGGCGTTTGGAGCTCTGCTTCCCTGCGAGGAATGTAAGGGGCAGTTTGTG  
TTCAAGAGCGATGCATACTACTGTTTCAGGGGACATTACTGCCTGGACTAAGTGTGTGGCT  
AAAACACAGACTCCCAACAGGAAAGACTGGGTAATCCCAAAGGAATTCGTGAAATTCCT  
TATCTCAAAAAGTTAAGTGAAGAAGCAGGACAGGATATCCCTCCTGAGGCTGCAACT  
GTGAACTCTGTGCCACCTCCATCTGTATCTGCTCCTTTGACAGAGACTGTCTCTACACC  
CAAGACAAACCACTGACCAACATGAAGATCCTGACCCTTGAAAGCTGTCCAAGAACAAG  
GAGGAAGTGAAGAATATTGTGGAGGAGTTGGGAGGAAAATGACAACAACAGCTAACAAG  
GCCACCCTGTGCATCAGCACACAGAAGGAGGTGGAGAAAATGAGCAAGAAGATGGAAGAA  
GTGAAGGATGCCAAAGTTCGTGTGGTCTCAGAGGAGTTTCTTAAGGATGTGAAATCTTGC  
AGCAAGAGCTTTCAGGAGCTTCTCTCTCCATGCAATTTACCTTGGGGTGCAGAGGTG  
AAAACGGAGCACCAGGAGGTGGCGGTGGATGGGAAGTGCAGCAAGCCCCAAATATGAAG  
AGTGCTGGGAAGGTCAAAGAAGAACAAGGACCTAGCAAGTCTGAAAAGAAAATGAAGCTA  
ACAGTTAAAGGTGGAGCAGCAGTAGATCCTGACTCTGGCTTGGAGGATTCTGCTCACGTC  
TTTGAAAAGGTGGAAAGATTTTCAGTGCAACTCTTGGCCTAGTAGATATTGTGAAAGGA  
ACAAATTCCTATTACAACTGCAGCTGCTAGAGGATGACAGAGAGAGCAGGACTGGGTG  
TTCAGATCCTGGGGTCGTGTGGGCACTGTCATTGGGAGTAACAAGCTGGAGCAGATGCCA  
TCAAAGAAGATGCTGTTGAACACTTCTAAATTTGTATGAAGAGAAAACGCAATTCT  
TGGCATTCAAAGAACTTCACTAAATATCAAAAAAATCTACCCACTGGAAATAGATTAT  
GGACAGGATGAAGAAGCTGTCAAGAACTGACAGTGGGTGCTGGGACTAAATCAAAGCTT  
GCTAAGCCAATCCAAGACCTTATTAAGATGATTTTTGATGTGGAGAGCATGAAGAAAGCT  
ATGGTGAATTTGAGATCGACCTGCAGAAGATGCCACTGGGGAACTGAGCAAGCGACAG  
ATCAAAGTGCATACTCCATCCTAATGAAGTTCAGCAGGCAGTTTCTGATGGTGGTTCT  
GAATCCCAGATCTTGGACCTCTCAAACCGTTTCTATACTCTGATCCCTCATGACTTTGGG  
ATGAAGAAACCACCTTCTCAGTAACCTAGAATATATCCAGGCTAAAGTGCAGATGTTG  
GACAACTTGCTTGATATTGAGGTTGCCTACAGTCTTCTCAGAGGTGGAAATGAAGATGGA  
GATAAAGACCAATTGATATCAATTATGAAAAGCTTCAACTGATATTAAGGTAGTTGAC

AAAGATTCAGAAGAAGCCAAGATTATTAACAATATGTGAAAAATACTCATGCTGCTACT  
CACAATGCATATGACCTCAAAGTTGTGGAATCTTCAGGATTGAACGTGAAGGAGAGAGT  
CAGCGTTACAAGCCATTTAAGCAGCTTCATAATCGCCAGCTGCTGTGGCACGGTTCGCCG  
ACCACCAACTTCGCTGGTATCCTCTCGCAGGGTCTCCGATAGCTCCCCCTGAAGCTCCT  
GTGACTGGCTACATGTTTGGGAAAGGCATCTACTTTGCAGACATGGTGTCCAAGAGTGCC  
AACTACTGTCACACATCTCAAGCTGATCCAATTGGGTTAATACTACTGGGAGAAGTTGCC  
CTTGGAAATATGTATGAGCTAAAGAATGCTTCTCACATAACAAAATTGCCAAAGGAAAG  
CATAGTGTGAAAGGCTTGGGTAATACTGCACCTGATCCACAGCCACTACAACCTTGAT  
GGTGTAGAAGTTCCCTTAGGGAATGGGATCTCAACAGGAATTAATGATACCTGTCTTCTG  
TACAATGAATATATTGTGTATGATGTTGCTCAGGTAAATCTGAAGTACCTGCTGAAACTG  
AAATTCAACTATAAGACATCACTCTGG

>zebra finch\_PARP1

ATGGCGGCGCGCAGAGGGCCGTTCTTCTCCCGGACCTGCACCACCACCCCGCTGGACGGG  
GCCGTGCCGCTCCGGCCGGGCTCGGCGGCCGCGCTCTCGCCGCTTTGGGCGAGGGC  
TCCATGGCCGTGCCCCGGCGGGACCGCAGCTCCCGCCGCGAGCGCGCTCCCGCCGCCG  
GCGCGCCCCGCTGCGCGCCCCCGCGCCGACCCCTCCCGCCCTCCGCCCCGCCCTCG  
CGGCGCCGCATCCCGCCCGCATCCCGCCGAGCCCGCCCGCATCCCGCCGGAGCCCCGCC  
GCATCCCGCCGGGAGCCGAGCCCCGAGCCCCCGCCTCGTCCCGCCTGGGCAGCCAGAG  
CCAGGGCGAGGGTGGGACCAAAGTATCTGTCTCTGAACCACTGGTGTCTGGGCCAGGAA  
CTCCTGGAAGGAGTGATCAGCAAGAGCGAAGATTCTGCTGTGTGGAGCACCCGGCTGTCT  
GTGTGCTCGCAGCACCATCTATCTAGTGTTTACGGCCATCGCTCCTCGTCTGTGCTGG  
GCACCACCGAACGCCCGCCTGGAAATGGCATCACGAGGCCAGTATTTGTCTGCGGGAGA  
GCTGCTGAGTTCAGGCTCTCCAAGAGGGCGGGAGCCCGCTCTGTGTGCTCGGGGGCGGG  
ACAGGGGCGCGGGTGGCGGGCGGGACCCGAACCGCGCCCTGAGGGCGCAGCACGGGACG  
CGCCGCCGCGCCCGCCTCCATTGATACACAAGAGGAACCTCCAGACATGTGCAATCGAT  
GCCCCGAGCGACGATCCGCCCGCCGGCGAGGCATAGTGCGGGCTCGGCGTTCCGGCTGGC  
GCTGCCGCGGGCGGGTTCGCGGGCGGGCGCGGGGCGGGTTCGCGGGGGCGCGGGCGC  
GGCGCGGGCGGGGGCGGGCGGGCAGCGGGAGCGGGAGAGGGCGGATGGGAGCCGGCG  
GAGAAGCTGTACCGGGCCGAGTATGCCAAGAGCGGCCGCGCCTCCTGCAAGAAGTGCGGC  
GAGAGCATCGCAAGGACTCGCTGCGCCTGGCGCTCATGGTGCAGGGCCAGATTCGGATT  
TCCAAGAAGATGGTGCATCCTGAAAAGCCTCAGCTGGGAATGATAGATAACTGGTACCAC  
CCGGACTGCTTTGTGAGCCCGAGCCGAGCTGGGCTTCTCCCGCCTACGGGGCCACC  
CAGCTCCTGGGCTTACGATCCTGAAAGCTGAAGATAAAGAACTCTGAAAAGCAGCTC  
CCAGCTACCAAGAGTGAAGGAAAGAGAAAAGGAGAAGAGGTAGATGGAAATGTGACTGCA  
AAAAAGAAGCAGAAAAAAGAAAAAGAGAAAAGAAAACAAAGCAGCAGAAACAGCTGAAGGAG  
CAGACAGAGCTGATCTGGGGCATCAAGGATGAGCTGAGGAAGGTCTGCTCCACCAATGAC  
CTGAAAGAGCTGCTGATTGCCAACAAGCAGGAGGTCCCCTCAGGGGAGAATGCTATCTTG  
GACCGAGTAGCAGATGGGATGGCCTTCGGCGCTCTGCTGCCGTGTGAGGAGTCAAGGGG  
CAGTTTGTGTTCAAGAGTGACGCTTATTACTGTTTCAGGGGATATCACTGCCTGGACCAAG  
TGCGTGGCTAAAACACAGACTCCCAACAGGAAAGACTGGGTAATCCCAAAGGAGTTCTGG  
GAAATTCCTTACCTGAAGAAATTTAAATGTAAGAAGCAGGACAGGGTGTTCCTCCAGAT  
GCTGCGACTGTGAACTCGGCACCTCCTCCCTCTGCATCTGCTCCTTTGTCAGAGACTGTG  
TCTGCACCCCGAGACAAACCACTGACCAACATGAAGATCTTGGTTGTTGGGAAGCTGTCA  
AAGAACAAGGAGGAGGTGAAAAGCATCGTGGAGGACCTAGGAGGAAAGATGACCACAACA

GCTAACAAGGCAACCCTGTGCATCAGCACCCAGAAGGATGTGGAGAAAATGAGCAAGAAG  
ATGGAAGAAGTGAAGGAGGCCAAAGTCCGTGTGGTCTCAGAGGCATTTCTCAGGATGTG  
AAGTCTTCCAGCAAGGACTTCCAGGAGCTTGTGTCTCTCCATGCCCTTTCACCTTGGGGT  
GCAGAGGTGAAAATGGAGCACGAGGAAATGGCTGTGGATGGGAAGAGCAGCAAGCCCCCA  
AGTACAAAGAGTGCTGGGAAGGTCAAAGAAGAACAAGGACCTAGCAAGTCTGAAAAGAAA  
ATGAAGTTAACAGTGAAGGGTGGAGCAGCAGTAGATCCTGATTCTGGTTTGGAGGATTCT  
GCTCATGTCTTTGAAAAAGGTGGGAAAATTTTGTAGTGCAGCCCTGGGACTGGTAGATATT  
GTGAAAGGAACAAATTCCTATTATAAGCTGCAGCTGCTAGAGGATGACAGGGAGAACAGA  
TACTGGGTGTCCGATCCTGGGGCCGTGTGGGCACTGTAATCGGCAGTAACAAGCTGGAG  
AAGATGCCATCAAAGAAGATGCCATTGAGCACTTCTGAATTTGTATGAAGAGAAAAT  
GGCAATTCTTGGCATTGGAAGAATTCATAAATATCCAAAAAATTCTACCCACTGGAA  
ATAGATTACGGACAGGATGAAGAAGCTGTCAGGAACTGACAGTAGGTGCCGGGACAAAA  
TCAAACTCGCTAAGCCAATCCAGGATCTTATTAAGATGATCTTTGATGTGGAGAGCATG  
AAGAAAGCAATGGTGAATTTGAGATTGACTTGCAGAAGATGCCGTTGGGAAAATGAGC  
AAGCGACAGATCCAGAGTGCATACTCCATCCTGAATGAGGTCCAACAGGCAGTTTCTGAC  
AATGGTTCAGAATCCCAGATTTTGGATCTCTCAACCGCTTCTATACACTGATTCCTCAT  
GACTTTGGGATGAAGAAGCCACCTCTCTAAATAACTTGAATACATTGAGGCTAAAGTG  
CAGATGTTGGACAACCTGCTTGATATTGAGGTTGCTTACAGCCTTCTCAGAGGTGGAAT  
GAAGATGGAGATAAAGACCCAATTGACATCAACTATGAAAACTTAAACAGATATTAAG  
GTTGTTGACAAAGATTCAGAAGAAGCCAAGATTATCAAACAATATGTGAAAAACACTCAT  
GCGGCTACGCACAACGCATATGACCTCAAAGTTGTGGATATCTCAGGATTGAGCGTGAG  
GGGAGAGCCAGCGTTACAAGCCCTCAGGCAGCTCCACAACCGCCAGCTGCTGTGGCAC  
GGCTCCCGCACCACCAACTTCGCTGGGATACTCTCGCAGGGTCTGCGGATAGCTCCTCCT  
GAAGCTCCTGTGACCGGCTACATGTTTGGGAAGGGCATCTATTTGCAGACATGGTATCC  
AAGAGTGCAAACTACTGTACACATCTCAAGCTGATCCCATAGGTTTAGTACTACTGGGA  
GAAGTCGCCCTTGAAATATGTATGAACTAAAGAATGCTTCCACATCACAAAATTGCC  
AAGGGAAAACACAGTGTCAAAGGCTTGGGCAAACTGCGCCTGATCCACAGCCACGACC  
ACCCTTGGTGGTGTGGAGGTTCCCTTAGGGAATGGGATCTCCACAGGAATTAATGATACC  
TGTCTTCTGTATAATGAATATATTGTGTATGATGTTGCTCAGGTGAATCTGAAGTACCTG  
TTGAAACTGAAATCAACTATAAGACATCACTCTGG

>American\_alligator\_PARP1

ATGGCGGAGCCGGCGGACAAGCTGTATCGGGCCGAGTACGCCAAGAGCGGGCGGGCCTCG  
TGCAAGAAATGCGGGGAGAGCATCGCCAAGGACTCGCTGCGCCTGGCTATCATGGTGCAG  
TCACCCATGTTGATGGCAAAGTCCCTCACTGGCATCATTACACTTGTTTTTGGAAGCGG  
GCTCGGATCACGTCTCATGCAGATATTGATGGCTTCCCTGAGCTGCGATGGGAAGATCAA  
GAGAAAATAAAAAAACCATTGAAGCAGGGGGACCTGCCACAGGTAAAGGTGGTGACCAG  
GAAGGAGGTGGCAAGGCTGAGAAAAGTTTACATGACTTTGCAGTAGAATATGCCAAGTCT  
AACAGAAGTACCTGCAAAGGCTGTGAACTGAAAATAGAAAAGAGTCAGATCAGAATTTCT  
AAGAAGATGGTGCATCCAGAAAAGCCCCAGCTGGGAATGATAGATAACTGGTACCATCCA  
GACTGCTTTGTGAGCCGCCGAGCAGAGCTGGGCTTTCTCCCTGCGTTTTGGTGCCAGTCAG  
CTCCAGGGCTTTGGCATTGTTGGTAGCTGAGGATAAAGAATCCCTGAAGAAGCAGCTGCCT  
GCCGTCAAGAGTGAAGGAAAAAGAAAAGCAGATGAGATGGATGGGACTGTGACTACAAAA  
AAGAAAACAAAAAAGAAAAGGATAAAGAATCCAAACAGGAGAAGCTGCTGAAGGAACAG  
ACGGAATTGATTTGGAACATCAAAGACGAGCTGAGGAAAGCCTGCTCCACCAACGACCTG

AAAGAGCTGCTGATGGCCAACAAACAGGAAGTGCCTTCTGGGGAATCTGCTATCTTGGAC  
AGAGTGGCAGATGGGATGGCATTGGAGCTCTGCTCCCTGTGAAGAGTGCAAGGGGCAG  
TTTATGTTCAAGAGTGACGCGTACTACTGCTCAGGAGACATTACTGCCTGGACTAAATGT  
GTTGCCAAAACACAGTCTCCCAACAGGAAAGAATGGGTATCCCAAAGGAATTCCGGGAA  
ATCCCTTACCTTAAGAAATCAAGTGTA AAAAGCAGGACAGAGTATTCCCTCAAGAGGCT  
GCTGCTGTGAACACTGTGCTTCCAAGTGCAGCTTCTGCTCCTTTGACAGAGGAGGCATCT  
GCACCCACAGATAAGCCATTATCCAACATGAAGATTTTGATACTTGAAAAATTATCCAGG  
AACAAAGAAGAAATGAAGACCAGAGTTGAGGAGCTTGAGGAAAAGTGACAGGAACTGCG  
AATAAGGCCAACCTGTGCATCAGCACACAAAAGGAAGTTGAGAAAATGAACAAGAAGATG  
GAAGAAGTGAAGGAGGCAAAGTCCGAGTGGTTTCAGAAGAATTTCTCAAGGATGTGAAA  
TCTCCAGCAAAGGCTTTCGGGAACTGCTGTGAGTACATGAGCTCTCATCCTGGGGTGCA  
GAGGTGAAGCAGGAGAACATGGAGACA ACTGTGGGAGGAAAAGTCCAGTGGGCCCCCAAAT  
ATGAAGAGTGTGAAAAGTCAAGGAAGAGCAAGGGACCTGCAAGTCTGAAAAGAAAATG  
AAATTGACAGTTAAAGGAGGAGCGGCCGTAGATCCTGATTCTGGTTTGGAGGACTCTGCT  
CACGTCTTTGAAAAGGTGGTAAAATCTACAGCGCCACTCTTGGCCTGGTAGATATTGTC  
AAAGGAACCAATTCCTATTACAACTGCAGCTGCTGGAGGATGACCGAGAAATCAGGTAC  
TGGGTGTTTAGGTCATGGGGTCGCGTTGGCACTGTGATTGGGAGTAACAAGCTGGAGCAG  
ATGCCATCTAAAGAAGATGCCATTGAGCACTTTTTAAATCTGTATGAAGAGAAAACGGGC  
AATTCCTGGCATTCCAAGAACTTACGAAATATCCAAAGAAATTCTACCCTCTAGAAATA  
GATTATGGACAGGATGAAGAAGCTGTGAAGAACTGACAGTAGGTGCCGGCACAAAGTCA  
AAGCTTCTAAATCAGTCCAGGACCTTATTAAGATGATCTTTGATGTGGAGAGCATGAAG  
AAAGCCATGGTGAATTTGAGATTGACCTCCAGAAGATGCCATTGGGAAAGCTGAGCAAG  
AGACAGATCCAGAGTGCCTATTCCATCCTTAATGATGTTACAGCAGGCAGTTTCTGGTGGC  
GGCACTGATTCTCAGATACTGGACCTCTCCAATCGCTTCTACACGTTGATACCTCATGAC  
TTTGGGATGAAAAGCCACCTCTTTTAAATAACCTAGAATATATTCAGGCCAAAAGTGCAG  
ATGTTGGACAACCTGCTTGATATTGAGGTTGCTTACAGCCTTCTCAGAGGTGGAACGAG  
GATGGGGATAAAGACCCAATTGATGTCAACTATGAAAAGTCAAACTGAAATTAAGGTG  
GTTGATAAAGATTGAGAAGAAGCCAAGATCATAAAGCAATATGTGAAGAATACCATGCT  
GCTACCCACAATGCATATGATCTGAAAGTTGTGGATATCTTCAAATGAGCGTGAAGGG  
GAGAGTCAGCGTTACAAGCCATTGACAGCTTACAATCGCCAGCTGCTCTGGCATGGC  
TCACGTAACCACTTTGCTGGTATTCTCTCACAGGGTCTCCGAATAGCTCCGCCTGAA  
GCTCCTGTGACTGGTTACATGTTTCGGAAAAGGTGTCTATTTGCAGACATGGTTTCCAAG  
AGCGCAACTACTGTCACACATCTCAGGCTGATCCAGTAGGCTTAATCTTATTGGGAGAG  
GTTGCCCTTGGAACATGTATGAGCTAAAGAATGCTTCTCACATAACTAAGTGCCGAAG  
GGGAAACATAGCGTCAAAGGTTTAGGCAAAGTGCCTGATCCACAGCCACCATCAGT  
TATGAGGGTGTAGAAGTTCTTTGGGGAATGGAATGTCAACAGGAATTAATGATACTTGT  
CTTCTGTATAATGAATATATTGTCTACGATGTTGCTCAGGTAACTTGAAGTACCTGCTG  
AAACTGAAATCAACTACAAGACATCACTCTGG

>Armadillo\_PARP1

ATGGCTCTGGCGGGTGAGGCGCGGGCAGCTCCGCCAGGCGACTCCTGTCTCCTCTCGC  
CGGACATTGGGGTGTGCGGACGGCACGGCGGAGACCCCGACTCAGCCAGCGGGGCGCCC  
CACCCCGGGCTTCGCGTCTCGTCACTGGCGTTCAGCGGCGTTGCTTTGGGCCCGCGCCC  
GCGACGGCCCTCCCGGGGAGCCGGGCGCGCAAGCCGCGCAGGTGCTTACCTTCTGGAG  
GGTCCAGGTGGGGACAAAGGCTGGTTCCATGGTTTACGAGGTGGGGGCCAACAGCCCC

ATCGAAGAGGGAACGTCCCTCCATCAAGCAAACGGCGGGGACTGTGGCTTCCTTAACGTT  
GGGCGCCTGGAGCCGCAGCCGCCGCTGAGCCTCCAGCCAACTGGGAACGGGTGGGCCCC  
TGGGTGCAGGTCAGCGGCCCGGCTGAGGTCCCCATGTTTGATGGGAAGGTCCCACAC  
TGGTACCACTTTTCTGCTTCTGGAAGGTCGGCCACTCCATCCGGCACCTGACGTGAA  
GTGGATGGGTTCTCCGAGATTCGGTGGGATGACCAGCAGAAAATCAAGAAGACGGCAGAG  
GCCGGGGGCGTGACGGGCAAAGGCCAGGATGGAGGTGGCAGCAAGACGGAGAAGACTG  
GGTGACTTTGCAGCAGAGTATGCCAAGTCCAACAGAAGCACCTGCAAGGGCTGTATGGAG  
AAGATAGAAAAGGGCCAGGTACGCCTGTCCAAGAAGATGCTAGACCCAGAGAAGCCACAG  
CTGGGCATGATCGACCGCTGGTACCATCCACACTGCTTCGTGAGCAGCAGGGCGGAGCTG  
GGCTTCCGGCCCGAGTACAGCGCCAGCCAGCTCAAGGGCTTCAGCCTCCTCACTCCAGAG  
GACAAAGAAGCCCTGAAGAAGCAGCTCCAGGAGTCAAGAGTGAAGGAAAGAGAAAAGGT  
GATGAGGTAGATGGAATTGATGAAGTGGCCAAGAAGAAATCCAAAAAGAAAAAGACAAG  
GATAGTAAGCTAGAAAAGGCCCTCAAGGCCAGAATGACCTGATCTGGAACATCAAGGAT  
GAGCTGAAGAAAGTGTGTTCAACCAACGACCTGAAGGAGCTCCTCATCTTCAACAAGCAG  
CAAGTGCCCTCCGGGGAGTCAGCGATCTTGACCGCGTTGCTGACGGGATGGCGTTTGGG  
GCCCTCCTCCCTGTGGGGAGTGTCTGGGCCAGCTGGTCTTCAAGAGCGACGTTACTAC  
TGTACCGCGATGTCACTGCCTGGACCAAGGTACAGTGAAGACACAGACACCCGGTCCG  
AAGGAATGGGTGACCCCAAAGGAATTCCGGGAAATCTTACCTCAAGAAATTGAAAATC  
AAGAAGCAGGACCGTTTATTTGCCCCAGAGACCAGTGTCCCAGCAGCAGCACCCCCGCTG  
CCCCTGCCTCAGCGCCCGCTGCCCTGAACTCCTCCGCTCCAGCAGATAAACCACTCTCC  
AACATGAAGATCCTGACTCTCGGGAAGCTCTCGCGGAGCAGGGATGAGGTGAAGGCCACC  
GTGGAGAAGCTCGGCGGAAGCTGACGGGGACGGCCGCAAGGCCTCGCTGTGCGTCAGC  
ACTCGGAAGGAGGTGGAGAAGATGAATAAGAAGATGGAGGAAGTAAAAGAAGCCAATATT  
CGCGTTGTGTCTGAGGATTTCTGCAGGACGTCTCTACCTCAACTAAGAGCCTTCAGGAG  
CTGTTCTCAGCACACGTCTTGTCCCCCTGGGGGGCCGAGGTGAAGACGGAGCCTGGAGAA  
GCAGTGGCCCCGAGAGGGAAGTCGGCTGTCCCTCCAAGAAGAGCAAGGGCCCCGTAAG  
GAGGAAGGTATCAACAAATCTGAAAAGAGAATGAAGCTAACTTTAAGGGAGGAGCAGCA  
GTGCATCCTGATTCTGGCCTGGAGCACTCTGCGCACGTCTGGAGAAGGGCGGGAAGGTC  
TTCAGTGCCACCCTCGGCCTGGTGGACATCGTGAAAGGAACCAACTCCTACTACAAGCTG  
CAGCTTCTGGAGGACGACAAGGAAAGCAGGTACTGGATATTCAGGTCTGGGGCCGTGTG  
GGCACAGTGATTGGTAGCAACAAGCTGGAGCAGATGTCATCCAGGGAAGATGCCGTTGAG  
CACTTCATGAAATTATATGAAGAAAAAACCGGAATGCCTGGGACTCCAAAAATTTCACT  
AAGTATCCCAAAAAGTTTACCCGCTGGAGATTGACTATGGCCAGGATGAAGAGGCAGTG  
AAGAAGCTGACGGTAAACCCTGGCACCAAGTCCAAGCTCCCAAGCCGTTTCAGGATCTC  
ATCAAGATGATCTTTGATGTGGAAAGTATGAAGAAAGCCATGGTGGAGTACGAGATTGAC  
CTTCAGAAGATGCCCTTGGGGAAGCTGAGCAGAAGGCAGATCCAGGCCGCTACTCCATC  
CTCAGCGAGGTCCAGCAGGCAGTGTGCGAGGGCAGCAGCGACTCGCAGGTCTGGACCTC  
TCGAACCGCTTCTACACCCTGATCCCCACGACTTTGGGATGAAGAAGCCTCCGCTGCTC  
AACAGTGCCGACAGCGTGCAGGCCAAGGTGGAGATGCTGGACAACCTGCTGGACATCGAG  
GTGGCCTACAGCCTGCTCAGGGGGGGCTCTGACGATGGCAGCAGAGACCCCTCGACGTC  
AACTACGACAAGCTCAAACCAACATTGAGGTGGTGGACAGGGCTTCTGAAGAGGCCGAG  
ATCATCAGGAAGTACGTCCGGAACACGCACGCGGCCACGCACAACGCCTACGACCTGGAG  
GTGGAGGATATCTTAGGATAGAGCGTGAAGGGGAGGGCCAGCGCTACAAGCCCTCAGG  
CAGCTGCACAACCGAAGGCTGCTGTGGCACGGGTCCCGGGCCACCAACTTTGCCGGCATC

CTGTCCCAGGGTCTCCGGATCGCTCCACCTGAGGCACCCGTGACGGGCTACATGTTTGGG  
AAAGGAATCTATTTCCGCCGACATGGTCTCCAAGAGCGCCAACTACTGCCACACGTCCCAG  
GGAGACCCACGGGCTTGGTCCTGCTGGGCGAGGTCGCTCTTGGGAACATGTACGAGCTG  
AAGCACGCGTCACATATCAGCAAGTTACCCAAGGGCAAGCACAGTGTCAAAGGTTTGGGC  
AAAACCACCCCTGACCCTCAGCAAGCATTACTCTGGATGGGGTCGAGGTGCCTCTCGGG  
CCGGGGGTGTCGTCTGGTGTGAATGACACCTGTCTGCTGTATAACGAGTACATTGTCTAT  
GATGTTGCTCAGGTAAATCTGAAGTATCTGCTGAAACTGAAATTCAATTTCAAGACGACC  
TTGTGG

>Chicken\_PARP1

ATGGCGGAGACGGGGGACAAGCCGTACCGCGCGGAGTACGCCAAGAGCGGGCGGGCGTGC  
TGCAAGAAGTGCGGCGAGAGCATCGCCAAGGACTCGCTGCGCCTGGCCCTCATGGTGCAG  
TCGCCCATGTTTCGATGGCAAAGTCCCTCACTGGCACCACTACAGCTGCTTCTGGAAGCGG  
GCGCGGATCGTGTCCACACAGACATCGATGGCTTCCCTGAGCTCCGCTGGGAGGACCAG  
GAGAAAATCAAGAAGGCTATTGAAACCGGAGGCCCTGCAGGAGGAAAAGGGGGGACCAG  
GAAGGAGGTGGCAAGGCTGAGAAGAGCCTAACTGACTTTGCTGCAGAGTATGCCAAGTCT  
AACAGGAGTACTTGCAAAGGCTGTGAGCAGAAAATAGAAAAGGGCCAGATTCGATTCC  
AAGAAGATGGTGCATCCTGAGAAACCACAGCTGGGGATGATCGATAACTGGTACCACCCG  
GACTGCTTCGTAGCCGCCGGGAGAGCTGGGCTTCTCCAGCATATGGGGCCACACAG  
CTCCTGGGTTTCAGCATCTTGAAGCTGAAGATAAAGAACTCTGAAGAAACAGCTACCA  
GCTACTAAGACTGAAGGAAAGAGAAAAGGAGAAGAGGTAGATGAAAATGTGGTTGCAAAA  
AAGAAATCAAGAAAAGAAAAAGAAAAGAATCAAAGCAGGAAAAACAGCTGAAGGAGCAG  
ACAGAGCTGATCTGGGGCATCAAGGATGAGCTGAGGAAGGTCTGCTCCACGAATGACCTG  
AAAGAGCTGCTGATCGCCAACAAGCAGGAGGTGCCTTCAGGGGAGAATGCAATCTTGAC  
AGAGTGGCAGACGGGATGGCGTTTGGAGCTCTGCTTCTTGTGAGGAGTGTAAGGGCAG  
TTTGTGTTCAAGAGCGATGCATACTACTGCTCAGGGGACATTAAGTGCCTGGACTAAGTGT  
GTGGCTAAAACACAGACTCCCAATAGGAAAGACTGGGTAATCCCGAAGGAATTTCTGTAG  
ATTCCTTATCTCAAAAAATTTAAGTGAAGAAGCAGGATAGGATATTCCTCCTGAGGCT  
GCAACTGTGAAGTCTGCACCGCCTCCATCTGCATCCGCTCCATTGACAGAGACTGTCACT  
GCACCCCAAGAGAAACCACTGACCAACATGAAGATCCTGACTCTTGGAAAGCTGTCCAAG  
ACAAGGAGGAAGTGAAGAATATTGTGGAGGAGCTGGGAGGAAAGATGACAACAACAGCT  
ACAAGGCCACCCTGTGCATCAGCACACAAAAGGAGGTGGAGAAAATGAGCAAGAAGATG  
GAAGAAGTGAAGGATGCCAAAGTTCGTGTGGTCTCAGAGGAGTTTCTTAAGGATGTGAAA  
TCTTCCAGCAAGGGCTTTCAGGAGCTTCTCTCTCCATGCAATTTACCTTGGGGTGCA  
GAGGTGAAAACGGAGCACCAGGAGGTGGCGGTGGATGGGAAGTGCAGCAAGCCTGCAAAT  
ATGAAGAGTGTGGGAAGGTCAAAGAAGAACAAGGACCTAGCAAGTCTGAGAAGAAAATG  
AAGCTAACAGTTAAAGGTGGAGCAGCAGTAGATCCTGATTCCGGCTTGGAGGATTCTGCT  
CATGTCTTTGAAAAGGTGGGAAGATTTTCAAGTGCAACTCTTGGCCTAGTGGATATTGTG  
AAAGGAACAATTCCTATTACAAACTGCAGCTGCTGGAGGATGACAGAGAGAGCAGGTAC  
TGGGTGTTTCAGATCCTGGGGTCGTGTGGGCACTGTCATTGGGAGTAACAAGCTGGAGCAG  
ATGCCATCAAAGAAGATGCTGTTGAACTTCTAAATTTGTACGAAGAGAAAACCTGGC  
AATTCTTGGCATTCAAAGAAGTCTCACTAAATATCCAAAAAATTCTACCCACTGGAATA  
GATTATGGACAGGATGAAGAAGCTGTCAGGAACTGACAGTGAGTGCTGGGACTAAATCG  
AAGCTTGCTAAGCCAATCCAAGACCTTATTAAGATGATTTTTGATGTGGAGAGCATGAAG  
AAAGCCATGGTGAATTTGAGATTGACCTGCAGAAGATGCCACTGGGGAACTGAGCAAG

CGACAGATCCAAAGTGCATACTCCATCCTTAACGAGGTTTCAGCAGGCGGTTTCTGACGGT  
GGTTCTGAATCCCAGATCTTGGACCTCTCAAACCGCTTCTATACTCTGATCCCTCATGAC  
TTTGGGATGAAGAAACCACCTTCTCAGTAACCTGGAATACATTAGGCTAAAGTGCAG  
ATGTTGGACAACCTGCTCGATATTGAGGTTGCTTACAGTCTTCTCAGAGGTGGAATGAA  
GATGGAGACAAAGACCCAATTGATATCAATTATGAAAAGCTCCGAACTGATATTAAGGTG  
GTTGACAAAGATTGAGAAGAAGCCAAGATTATTAACAATACGTGAAAAATACTCATGCT  
GCTACTACAATGCATATGACCTCAAAGTTGTGGAAATCTTCAGGATTGAACGTGAAGGA  
GAGAGTCAGCGTTACAAGCCATTTAAGCAGCTTCATAATCGCCAGCTGCTGTGGCACGGT  
TCCCGCACCACCAACTTCGCTGGTATCCTCTCACAGGGTCTCCGGATAGCTCCCCCTGAA  
GCTCCTGTGACCGGCTACATGTTTGGGAAGGGCATCTACTTTCAGATATGGTTTCCAAG  
AGTGCCAACACTGTGCACACATCTCAAGCTGATCCAATTGGGTTAATACTACTGGGAGAA  
GTTGCCCTCGGAAATATGTATGAGCTAAAGAATGCTTCTCACATAACAAAATTGCCAAG  
GGAAAACATAGTGTGAAAGGCTTGGGCAAAAAGTGCACCTGATCCCACAGCCACTACAACC  
CTTGATGGTGTAGAAGTCCCTTAGGGAATGGGATCTCAACAGGAATTAATGATACTTGT  
CTGCTGTACAATGAATATATTGTGTATGATGTTGCTCAGGTAAATCTGAAGTACCTGCTG  
AAACTGAAATCAACTATAAGACATCACTCTGG

>Chinese softshell turtle\_PARP1

ATGGAGGAGGAGGATGGTATGACAATGAGGAGGCAGAGGAGAAGGCCAGTCTGGACACC  
ATGCCACCAGCTGGGAGCTTGCTATCTGCATGGAGCCGGTATCCTCCTCCAGGATGTC  
TCCCAGGGCTTGGACAATCCAGGGAAGGCACGTCAGACTCTGGGCTGGAGACACCTGTC  
ATCAGCCTCCCGGAGGGTGTAGTTGAGGAGGAGGAAGTGCAGGAGGGGGTGGAGGTCAGC  
ATCGACACCATGCCCGCCAGTCAGGAGTTCATCATGTCCCTGGAGCCATCCCCCTCCAG  
GATGTCACCCAAGGGTCAGACGAAGCAGGGGAAGGCCTATCAGAGGCTGGAGTTGTGGAA  
GACACGGGCGTCATGTGGCTTCCCCAACACCTGACATTGATGTCGGTGAACCTGGCCTTG  
GTGGTGCAAGATGGCTTATGGGACCATGGAAAAGTACCAGATGGTCCAGTTGATACAATC  
AGAAGCTTGGTGGTCTGGGGCCCAGATGGGGATGTGGGTGCTGTCAATGGCCTCCCTGCA  
TTTGGGGAAGCCTATGGCGGCAAAGCCAAAACAATGGGGGCCATCTCGCCCCGCCGAC  
GAGCCCTCACCATGTTTGTATGGTAAAGTCCCCACTGGCATCATTATGCTTGTCTG  
AAGCGGGCCCGACTTGTGTCTCATGCAGATGTTGATGGCTTCCCCGAGCTCAGATGGGAA  
GACCAGGAGAAAATCAAAAAAGCAATTGAAACTGGAGGAGCTGGAGCAGGTAAAGGCGGT  
GACCAGGATGGAGGTGGCAAGGCTGAGAAGAGCTTACATGATTTTGTGTCAGAATATGCC  
AAGTCTAACAGAAGTACCTGCAAAGTTGTGAACAGAAAATAGAAAAGGGCCAGATCAGA  
ATTTCCAAGAAGATGGTGATCCTGAAAAGCCCCAGCTGGGAATGATAGATAATTGGTAC  
CATCTGGACTGTTTTGTGAGCCACCGAGCAGAATTGGGCTTTCTCCCTGCATTTGGTGCC  
AGTCAGCTCCAGGGCTTTGGGATGTTGAAAGCAGAAGATAAAGAAGCTCTGAAGAAGCAA  
CTGCCTGCTGTGAAGAGTGAAGGAAAGAGAAAAGGTGATGAAATGGATGGAAATGTGATC  
TCAAAAAGAAACAAAAAAGAAAAAGAGAAAGAATCCAAGCAGGAGAAGCTATTGAAG  
GAGCAGACAGAGCTGATCTGGAGCATCAAAGATGAGCTGAAGAAAGTCTGTTCCACTAAC  
GACCTGAAAGAGCTGCTGATAGCCAACAACAAGAAGTGCCTTCTGGGGAATCTGCTATC  
TTGGACCGAGTAGCAGATGGGATGGCATTGAGGCTCTGCTTCCCTGTGAAGAGTGAAG  
GGACAGTTTGTGTTCAAGAGTGTGCATACTACTGCACAGGGGACATCACTGCTTGGACT  
AAATGTGTTGCCAAAACGCAGATCCCCAACAGGAAGGAATGGATAATCCCAAAGGAATTC  
CGGGAAATCTCCTATCTGAAGAAATTTAAGTGTAAAAAGCAGGACAGAGCATTCCCTCCA  
GAGGCTGTGGCGGGGAACACTGCACTTCCAGCAACAGCTTCTGCTCCTTTGACAGAGAAA

GCATCTGTGCCATCAGATAAACCGTTATCGGGCATGAAGATTTGACCCTTGAAAAATTA  
TCCAGGAACAAAGAAGAAGTGAAGGCAATAATTGAGGGCCTGGGTGAAAGGTGACAGGA  
ACAGCAAACAAGGCTACCCTGTGCATCAGCACACAAAAGGAAGTTGAGAAAATGACCAAG  
AAGATGGAAGAAGTGAAAGAAGCCAAAGTCCGAGTGGTCTCTGAGGAGTTCTTGCAGGAT  
GTGAAATCCTCCAGCAAGGGCTTCCAGGAGCTCCTGTCTTTGCATGCAGTCTCCCCTTGG  
GGTGCAGAGGTGAAGCATGAGCATAACAGAGATGTCCCTGGGAGGAAAGTCCAGCAGGCTC  
CCAAATATGAAGAGTGTGAAAGATCAAGGAAGAACAAGGAAGTCAAGTCTGAAAAG  
AAAATGAAGTTAACGGTTAAAGGAGGAGCAGCAGTGGATCCTGATTCAGTCTTGGAGGAC  
TCTGCTCATGTCTTTGAAAAGAGTGGTAAAATCTTCAGTGTACACTTGGCCTGGTAGAT  
ATCATCAAAGGAACCAATTCCTATTACAACTGCAGCTACTGGAGGATGACAGAGAAATC  
AGGTAAGGTTTTCAGATCTTGGGGTCGTGTTGGCACCGTAATTGGGAGTAACAACTG  
GAGCAGATGCCATCTAAAGATGATGCCATTGAGCATTCTTGAATTTGTATGAAGAGAAA  
ACAGGCAACTCCTGGCATTCCAAGAACTTCACTAAATATCCAAAAAATTCTACCCTCTG  
GAAATAGACTATGGACAGGATGAAGAAGCTGTGAGGAAATTGACAGTGTGAGGGACC  
AAGTCAAAGCTTCCAAAACAGTCCAGGACCTTATTAAGATGATATTTGATGTGGAGAGC  
ATGAAGAAAGCCATGGTGAATTTGAGATTGACCTCCAGAAGATGCCCTGGGAAAGCTG  
AGCAAGAGGCAGATCCAGAGTGCATACNNNNNNNNNNNNNNNNNNNNNNNAGGCAGTTTCT  
GATGGTGGCAGTGATTCTCAGATACTGGATCTCTCAATCGCTTCTATACTGATACCC  
CATGATTTTGAATGAAGAAACCACTCTCCTAAATAACCTAGAACATATCCAGGCCAAA  
GTGCAGATGTTAGACAACCTGCTTGATATCGAGGTTGCTTACAGCCTGCTCAGAGGTGGA  
AATGAAGATGGGGATAAAGACCCCATGATGTCAACTACGAAAAGCTCAAACTAACATT  
AAGGTTCTTGATAAAGATTCCGAAGAAGCCAAGATCATAAAGCAGTATGTGAAGAATACA  
CATGCCTCTACCCACAATGCATATGATCTGAAAGTTGTGGATATCTCAAGATTGAACGT  
GAAGGGGAAAGTCAGCGTTACAAACCACTTCAAACAGCTTCATAATCGCCAAGTCTCTGG  
CATGGCTCCCGCACTACCAACTTTGCTGGCATCTTCTCACAGGGTCTCCGAATAGCTCCA  
CCTGAAGCACCTGTGACTGGTTACATGTTTGGTAAAGGTGTCTATTTGCCGACATGGTG  
TCCAAGAGTGCCAAGTACTGTACACATCTCAGACTGACCCAATAGGCTTAATCTTACTG  
GGAGAGGTTGCCCTTGAAACATGCATGAACTAAAGAATGCTTCTCACATATCTAAGTTG  
CCCAAGGGAAAACACAGTGTCAAAGGTTTAGGCAAGACTGCACCTGATCCTTCAGCCACT  
ATCACTCTAGATGGTGTGGATATTCCTTTAGGGAATGGAATCCATCTGGAATTAGTGAT  
ACCTGTCTTCTATATAATGAATACATTGTCTATGATGTTGCTCAGGTAAATCTGAAGTAT  
CTACTGAACTGAAGTTCAACTACAAGACATCACTCTGG

>Cod\_PARP1

GGAGACTCAAACGAAGACAAGCTTTACAAAGCCGAATATGCTAAAAGTGGCCGTGCGTGG  
TGCAAGAAATGCAAGGAGAACATTGCTAAAGATTCGCTCCGAATGGCCATCATGGTGACG  
TCGCCATGTTTGACGGGAAGGTCCCCACTGGCACCACTTCTCTGCTTCTGGCAGCGG  
GCAGCGGCCAGTCCACCGCGGACATCGCTGGCTTCTCGGACCTCCGCTGGGAGGACCAG  
GAGAAAGTCAAAAAGGCCATCGAGACCGGAGGAGTGACCGGAGGCAAAGCAGACCAAAAA  
GGCGGAGCCAAAGGAGAGAAGACGCTCAATGACTTTGCTGTGGAATATGCCAAGTCTAAC  
CGCAGCACCTGCAAAGGCTGCGAGCAGAAAATAGAAAAGGATCAGATCCGCGTGTCCAAG  
AAGTCAGTGGATGCGGAGAAGCCCAGCTGGGTCTGATCGACCGCTGGTACCACACAGCC  
TGCTTCGTCAGCCGCCGAGGAGCTGGTGTCAAGTCCGAGTACAGCGGCGCCAGCTC  
AAGGGCTTCAACGACTGCGGGCTGAGGACAAGGAGGACCTGAAGAAGAGGCTGCCCGG  
GTGAAGTCTGAAGGAAAGAGAAAACGGTGACGAGTTGGACGGGGTGTCAAAGAAAGTGAAG



AAGGAGAAAGAAGACGAAGATAAAAAGCTTGAGGACCAACTAAAGGTGCAGAGTCAGCTG  
ATATGGGGCATCAAGGACAAGCTGAAGAAGAACTGCTCCTCCAACGACATGAAGGAGCTG  
CTGATTGCAAACCTCCAGGAGGTGCCATCTGGAGAGTCCAACCTGGTGGACTGCCTGGCG  
GACGGCATGGCGTTTCGGCTCCCTCCAGCCCTGTGCGGAGTGCAAGGGGCAGCTGGTGTTC  
AAGGGCAACGCCTACTACTGCAGCGGGGACATCTCTGCCTGGACCAAGTGTGTGTTACC  
ACCAAGTCGCCCCGTCCGCACAGACTGGGTCAATCCAAAGGAATCCACGAGGTTCCCTTC  
CTCAAGAAGTTCAAGTGTAAAGAACAGGACCGGATCTTCCCAAGGTTGAGCAACGCCAC  
CCTGTCGTCGCCACCGCTGCCTCCAGTGGGTGCGACTAAACCTTTCCAGAAGGGGGCCCCA  
GCTGGCAAGCCTCTGACGGGCATGAAGCTGCTTGCTGTGGGTAAACTGAAGAAGAACAAG  
GATGAGATCAAGGCTGTCGTGGAGGAGATGGGCGGAAGATAACCCCTCAGCCAATAAG  
GCGGACCTCTGCCTCAGCAACGCAAAGGAGCTGGAGAAGATGACCAAGAAGATGGAGGAG  
GTGAAGGAGGCCGGGTGCGAGTGGTCGCCGAGGAGTTCCTCACGGACGTCAAGGCGTCG  
GGCAAGTCTCTCAGGAGCTGGTCTCCGTGCACGCCATCTCTCCCTGGGGGGCGGAGGTC  
AAGGTGGAGGTCAAAGTGGAGCCCAAGGCTGCTGCCGTGCCCTCAAAGTCCGGGGCCATG  
GCCGCCAAGAGCACCGGCCCGTGAAGGAGGAGGAAGGGGGCAGCAAGTCTAAGAAGATG  
AAGCTAACTGTGAAAGGAGGAGCTGCCGTGGACCCTGATTCGGGCCTGGAGAACAGCGCC  
CATGTCCTGGAGCAGAGTGGGAAGATGTACAGCGCCACCCTGGGTCTGGTGGACATCGTC  
CGCGGAACCAACTCTACTACAAGCTGCAGCTCCTGGAGGACGACGTCCAGAAGCGGTAC  
TGGGTGTTCAAGTCTGGGGCCCGTGGGCACCACCATCGGGGGCCACAAGCTGGACAAG  
TTTAGTGACAAGCTCGCAGCCATGGACAACCTTCTGGGCGTCTACACGGATAAGACTGGC  
AACACCTGGAAGTGCACCAACTTACCAAGTATCCCAATAAGTTCTACCCGCTGGAGATC  
GACTACGGACAGGACGAGGAGGCTGTGAAGAGGCTCACGGAGAGTGCTGGCACCAAGTCT  
GAGCTGGCCAAGCCCGTCCAGGAGCTCATCAGGATGATCTTTGACGTGGAGAGCATGAAG  
AAGGCCATGGTGGAGTTTGGATTGACCTCCAGAAGATGCCCTGGGAAAGCTGAGTAAG  
AGGCAGATCCAGAGCGCCTACGCCCTCCTCAGTGAGGTGCAGCAGGCTGTGACAGACAGT  
TCGGCCGAGTCCCAGATCCTAGACCTGTCCAACCGCTTCTACACGCTCATCCCCACGAC  
TTCGGCATGAAGAAACCCCTCTGCTGAGCAACCTGGACTACGTTTCTCAGTCCAAGTCCAG  
ATGTTGGACAACCTGTTGGACATTGAGGTGGCCTACAGCCTGCTGAGAGGAGGGGCAGAG  
GACAACGGGAAGGATCCCATCGATATCAACTATGAGAACTCAAACCAAGATTGAAGTG  
GTTGACAAGAACAGCGAGGAGGCCGAGATCATTATGCAATATGTCAAGAACACACACGCT  
GCTACACACAACACCTACACTGGAAGTAGACGAGATCTTCAAATAGTTCGCGAGGGC  
GAGTACCAAAGGTTCCGGCCCTTCAAGGACCTGCACAACCGGCAGCTGCTGTGGCACGGC  
TCGCGCACCAACTACGCCGGCATCCTGTCTCAGGGTCTGCGCATCGCCCCCAGAG  
GCCCTGTGACTGGTTACATGTTCCGGCAAGGGTGTGTACTTTGCCGACATGGTGTCCAAG  
AGTGCAAACACTACTGCCACGTGTACAGTTGGATCCCGTAGGCCTTTTACTTCTGGGAGAG  
GTCGCCCTTGGCAACGTGCATGAACTGAAGAAGGCTGCGCACATTACCAAACCTACCTAAG  
GGAAAACACAGTGTTAAAGGTGTGGGCAGAACCGCCCCTGATCCCGGTTCCACTGCCACT  
CTAGATGGGGTGCAGGTGCCGCTAGGAAAGGGCTGCAATACCAACATCGACGACACCAGT  
CTTCTCTACAACGAGTACATCGTTTACGACGTTGCACAGGTGAACCTGAAGTACCTGCTG  
AAGACCAAGTTCAACTACCAGACGTCTCTTTGG

>Cow\_PARP1

ATGGCGGAGTCTTCAGACAAGCTCTACCGGGTCGAGTACGCCAAGAGCGGGCGCGCTCT  
TGCAAGAAATGCAAAGAGAGCATCCCCAAGGACTCGATCCGGATGGCCTTCATGGTGCAG  
TCGCCATGTTGCATGGGAAAATCCCGCACTGGTACCACCTCTCTGCTTCTGGAAGGTC

GGCTTCTCCATCTGGCACCCCTGATGTGCGAGGTGGAGGGTTCTCTGAGCTCCGCTGGGAT  
GACCAGCAGACGATCAAGAAGATGGCCGAGACTGGCGGAGCGACAGATGTTTCAGGCAAA  
GGCCAAGATGGAGTTGGCAGCAAGACCCGAGAAGACGCTGATTGACTTCGGGGCAGGGTAC  
GCCAAGTCCAACAGAAGCACGTGCAAGAGCTGCATGGAGAAGATAGACAAGGGCCAGGTG  
CGCCTGTCTAAGAAGGTGGTGTACCCCGATAAGCCCCAGCTGGGCATGGTTGACTGCTGG  
TACCACCCAAAGTGTGTTTGTTCAGAAACGGGAGGAGCTGGGCTTCCGTCCCGAGTTCAGC  
GCAAGCCAGCTCATGGGCTTACGCGTCTCACCGCAGAGGACCAAGAAACCTCAAGAAG  
CAGCTCCCGGCCATCAAGGGTGAAGAAAGAGAAAAGGTGATGAGGTGGATGGAATAGAT  
GAAGTGACCAAGAAGAAATCTAAAAAGAAAAAGACAAGGAGATTAACTTGAAAAGGCC  
CTTAAGGCCCAGAACGACCTGATCTGGAATGTCAAGGACGAGCTAAAGAAAGCGTGCTCT  
ACGAACGACCTGAAAGAAGTCTCATCTTCAACAAGCAGGAAGTGCCCTCCGGGGAGTCG  
GCGATCTTGACCGCGTGGCCGACGGTATGGTGTGTTGGCGCCCTCCTCCCTGCGAGGAA  
TGCTCGGGCCAGCTGGTCTTCAAGGGCGACGCTTACTGTACCGGGGATGTGACTGCC  
TGGACCAAGTGTATGGTCAAGACACAGACGCCAACCGGAAGGAGTGGGTGACCCCAAAG  
GAATTCCGAGAAATCTTACTTCAAGAACTGAAGATCAAAAAGCAGGACCGTATATTC  
CCCCAGAGAGCAGCACCCCGTGGGGCAGCAGCCCCACCCTCTGCAGCTTACGCGCT  
GCCGCTGTGCACTCTGGCCCCAGACAAGCCATTATCCAACATGAAGATCCTGACTCTC  
GGGAACTCTCCAGAACAAGGATGAAGTGAAGGCCACGATTGAGAACTCGGGGGGAA  
TTGACAGGGACGGCCAACAAGGCCTCCCTGTGTATCAGCACAAAAAGGAGGTGGACAAG  
ATGAATAAAAAGATGGAGGAAGTAAAGAAGCCAACATCCGTGTCGTGTCTGAGGACTTC  
CTCCAAGACATCTCCGCTCCACCAAGAGCCTCAGGAGTTGCTCTCCACCCACCTCTTG  
TCCCCCTGGGGAGCCGAGGTGAAGGTGGAGCCTGTTGAAGCAGTGCCCCAAAGGGGAAG  
TCGGGGGCCGCGCCCTCCAAGAAGAGCAAGGGTCCCGTCAAGGAGGAAGGTACCAACAA  
TCTGAAAAGAGGATGAAATTAATCTTAAAGGAGGAGCAGCTGTCGACCCTGATTCAGGT  
CTGGAACACAATGCACACGTCCTCGAGAAAGCGGGAAGGTCTTACGCGCCACCCTCGGG  
CTTGTGGACATCGTCAAAGGGACCAACTCCTATTACAAGCTGCAGCTCCTGGAGGATGAC  
AAAGAGAGCAGGTACTGGATATTCAGGTCTGGGGCCGTGTGGGCACGGTATTGGTAGT  
AACAACTGGAGCAGATGCCATCCAAGGAGGATGCCATTGAGCATTATGAAATTATAT  
GAAGAGAAAACCGAAACGCCTGGCACTCTAAAACTTTACGAAGCATCCCCAAAAGTTC  
TACCCTCTGGAGATTGACTATGGCCAGGATGAAGAGGCGGTGAAGAAGTTGACAGTAAAC  
CCTGGCACCAAGTCCAAGCTCCCCAAGCCAGTGCAGAACCTCATTAAAGATGATCTTTGAT  
GTAGAGAGTATGAAGAAAGCCATGGTGGAGTATGAGATTGACCTTCAAGATGCCCTTG  
GGGAAGCTGAGCAAAGGCAGATCCAGGCTGCATACTCCATCCTCAGTGAGGTCCAGCAG  
GCACTGTCCCAGGGCAGCAGTACTCTCACATCCTGGATCTCTCCAACCGCTTCTACACC  
CTGATCCCCACGACTTCGGGATGAAGAAGCCCCGCTGCTGAACAACGCAAACAGCGTG  
CAGGCCAAGGTGGAAATGCTAGACAACCTGCTGGATATTGAGGTGGCTACAGTCTACTC  
AGGGGTGGTTCTGATGACAGCAGCAAGGACCCCATGATGTCAACTATGAGAAGCTCAA  
ACTGACATTAAGGTTGTGGACAAAGATTCCGAAGAAGCCGAGATCATTAGGAAGTATGTG  
AAGAACACTCACGCGACCACACAACGCGTACGACTTAGAAGTCGTCGACATCTTCAAG  
ATAGAGCGCGAAGGGGAAAGCCAGCGTTACAAGCCGTTAAGCAGCTGCATAACCGGAGG  
CTGCTGTGGCACGGGTCCAGGACCACCAACTTCGCGGGCATCCTGTCCAGGGTCTCCGG  
ATAGCCCCACCTGAAGCACCTGTGACGGGCTACATGTTGGTAAGGGAATCTATTTGCC  
GACATGGTCTCCAAGAGTGCCAACTACTGCCACACGTCACAGGGAGACCAATAGGCTTG  
ATCCTGTTGGGAGAAGTTGCCCTTGAAACATGTATGAACTGAAACATGCTTCGCATATC

AGCAAGTTACCCAAGGGCAAGCACAGTGTCAAAGGTTTAGGCAAACACTACCCCTGACCCA  
TCGGCTAGTATTACTGTGGATGGTGTGGAGGTGCCTCTCGGGACAGGGATTTCATCTGGT  
GTTAATGACACCTGTCTGCTGTATAACGAGTACATCGTCTACGACATTGCTCAGGTCCAC  
CTGAAGTACCTGCTGAAGCTGAAGTTCAACTTTAAGACATCCCTGTGG

>Dog\_PARP1

ATGCTCAAGGCCAGTCCAACCTTTCTTCTCTATGCTGGCGTGCTTCAGCAGCTTCATTGAT  
CCTCCCGCCCGAGAGCCGGGGAGGGCGGCCCGAGCGGTGCTGCGGGGTGGGGGGCTC  
CTCCTGCCTGTCCCGGCCGAAGTCTGAGGACGAGGCGAGCCTGGGCTTCTGAAGCCCGC  
CGCTTCTGCCCTCCCTCGTGCTGGAAGTCACCCATGTTTCGATGGAAAAGTCCCACACTGG  
TACCACTTTTCTGCTTCTGGAAGGTCGGCCACTCCATCCGGCACCCCTGACGTGGAGGTG  
GACGGTTTCTGAACTCAGGTGGGATGACCAGCAGAAAGTCAAAAAGACTGCGGAGGCT  
GGAGGCGTGACAGGCAAAGGCCAGGATGGAGGAGGTGGCAAGACAGACAAGACACTGGCT  
GACTTCGCAGCTGAATATGCCAAGTCCAACAGGAGCACGTGCAAGGGCTGCCTGGAGAAG  
ATAGAAAAGGGCCAAATACGCCTGTCCAAGAAGATGCTGGATCCAGAGAAGCCCCAACTG  
GGCATGATTGACCGCTGGTACCACCCGAAGTCTTTGTTAAGAACAGGGAGGAGCTGGGG  
TTCCGGCCCGAGTACAGCGCCAGTCAGTTCAAGGGCTTTGGCCTCCTCACTCCAGAAGAT  
AAAGAAGCCCTGAAGAAGCAGCTCCAGGAGTCAAGAGTGAAGGGAAGAGGAAAGGAGAT  
GAGGTGGATGGATGGATGAAGTGGCCAAGAAGAAATCTAAAAAAGAAAAGGATAAGGAC  
AGTAGGCTTGAGAAGGCCCTGAAGGCCAGAACGAGCTGATCTGGAACATCAAGGACGAG  
CTAAAGAAAGTGTGTTCTACAAATGACCTGAAAGAGCTGCTCATCTTCAACAAGCAGCAA  
GTGCCATCTGGGGAGTCAGCGATCTTGACCGAGTGGCTGATGGCATGGTGTTCGGTGCC  
CTCCTTCCCTGTGAGGAATGCTCAGGCCAGCTGGTCTTCAAGAGTGATGCCTACTACTGT  
ACCGGGGATGCTACTGCCTGGACCAAGTGTATGGTCAAGACACAGACACCCAGCCGGAAG  
GAGTGGGTGACCCGAAGGAATTCGAGAAATCTTTATCTCAAGAAATTGAAGATCAAA  
AAGCAGGACCGGATATTTCCCCTGAGACCAGTGCCCCAGTGGCAGCGGCACCTCCGCCC  
TCCACTGCCTTGGCGCTGTAGTGTAACAGCTCAACTCCGCCAGGTAAGCCATTGTCC  
AACATGAAGATCCTGACTCTTGGGAACTCTCGCGGAACAAGGATGAAGTGAAGGCCATG  
ATTGAGAAGCTCGGGGAAAGTTGACAGGCACAGCCAATAAGGCCTCCCTGTGCATCAGT  
ACCAAAAAGGAGGTGGAGAAGATGAACAAGAAGATGGAGGAGGTGAGAGAGGCCAGCATC  
CGAGTGGTATCTGAGGATTTTCTCCGGGACGTGTCTGATTCCACCAGGAGCCTTCAGGAT  
TTGCTCTCCGCCATGTGCTGGCTCCCTGGGGGGCTGAGGTGAAGGCAGAGCCAGCAGAG  
CCTGCAGCCCCTAAAGCCAAATCAGGAGCTGCGCTCTCAAGAAGAGCAAGGGCCCGTTC  
AAGGAGGAAGGCGTCAACAAATCTGAGAAGAGAATGAAATTAAGTCTGAAAGGTGGTGCT  
GCTGTTGATCCAGATTCAGGTCTGGAACACTCTGCACATGTTCTGGAGAAAGGTGGTAAA  
GTGTTTCAGCGCCACCCTAGGCCTGGTAGACATCGTGAAGGGAACCAACTCCTACTACAAG  
CTGCAGCTCCTGGAGGATGACAAAGAAAGCAGGTAAGTGGATCTTTCGGTCTGGGGCCGT  
GTGGGCACCGTGATTGGCAGCAACAACTGGAGCAGGTGCCGTCCAAGGAGGAAGCCATC  
GAGCACTTTATGAAATTGTATGAAGAGAAAAGTGGGAATGCCTGGCACGCCAAGAAGTTC  
ACGAAGCATCCCAAAAATTCTACCCTCTGGAGATTGACTATGGCCAGGACGAAGAGGCG  
GTGAAGAAGCTGACAGTGAAGCCTGGCACCAAGTCCAAGTCCCAAGCCCGTACAGGAC  
CTCATTAAAGATGATCTTTGACGTGGAAAGTATGAAGAAAGCCATGGTGAATATGAGATT  
GACCTTCAGAAGATGCCCTTGGGGAAGCTGAGCAAACGGCAGATTGAGGCCGCGTACTCC  
ATCCTCAGTGAAGTGCAGCAGGCAGTGTCCAGGGCAGCAGTACTCCAGATCCTGGAT  
CTCTCGAATCGTTCTACACCCTGATCCCCACGACTTTGGGATGAAGAAGCCCCCACTC



NNGTATTGGATATTCAGGTCCTGGGGCCGCGTGGGCACGGTAATTGGTAGTAACAACTG  
GAGCAGATGCCATCCAAGGAGGAGGCCATTGAGCATTTCGAAATTATATGAAGAGAAA  
ACCGGGAATGCCTGGCACTCCAAAACTTCACAAAACACCCCAAAAAGTTCTACCCTCTG  
GAGATTGACTATGGCCAGGATGAAGAGGCAGTAAAGAAGCTGACGGTAAACCCTGGCACC  
AAGTCCAAGCTCCCAAGCCAGTGCAGGACCTCATTAAAGATGATCTTTGATGTGGAAAGT  
ATGAAGAAAGCCATGGTGGAGTATGAGATTGACCTTCAGAAGATGCCCTTGGGGAAGCTG  
AGCAAAAGGCAGATCCAGGCTGCGTACTCCATCCTTAGTGAGGTCCAGCAGGTACTGTCC  
CAGGGCAGCAGCGACTCCCAGATCCTGGACCTCTCAAATCGCTTCTACACCCTGATCCCC  
CACGACTTCGGGATGAAGAAGCCTCCGCTCCTGAGCAACTCAGACAGCGTGCAGGCCAAG  
GTGGAAATGCTCGACAACCTGCTGGACATCGAGGTGGCCTACAGTCTGCTCAGGGGTGGT  
TCTGATGACAGCAGCAAGGACCCCATCGATGTCAACTATGAGAAGCTCAGAAGTACATT  
ATGGTGGTGGACAAAGATTCTGAAGAGGCTGAGATCATTAGGAAGTATGTTAAGAACACT  
CACGCGACCACACACAACGCATATGACTTGGAAAGTCGTGGATATTCTTAGAATAGAGCGT  
GAAGAGAGCCAGCGTTACAAGCCGTTCAAGCAGCTGCATAACCGAAGGTTGCTGTGGCAC  
GGGTCCAGGACCACCAACTTCGCCGGGATCCTGTCCCAGAGCCTCCGGATAGCCCCAGAA  
GCACCGGTGACGGGTACATGTTTGGTAAGGGGATCTATTCGCCGACATGGTCTCTAAG  
AGTGCCAACACTGCCACACATCCAGGGAGACCCAATAGGCTTAATCCTGTTGGGAGAA  
GTTGCCCTTGGAAACATGTATGAACTGAAGCATGCTTCGCATATCAGCAAGTTACCCAAG  
GGCAAGCCCAGTGTCAAAGGTTTAGGCCAAAACCTACCCTGACCCTTCAGCTAGTATTACT  
ATGGATGGTGTAGAGGTTCTCTTGGGACCGGGATTCATCTGGTGTAAACGACACCTGT  
CTACTGTATAACGAGTACATTGTCTATGATATTGCTCAGGTGAGTCTGAAGTATCTGCTG  
AAGCTGAAGTTCAACTTCAAGACCTCCCTGTGG

>Duck\_PARP1

ATGGTACATCCTGAAAAACCCAGCTGGGAATGATTGATAACTGGTACCACCCAGACTGC  
TTTGTGAGCCGCCGAGCGGAGCTGGGTTTCTCCAGCGTACGGGGCCGCCAGCTCCTT  
GGCTTCAGCATCCTGAAAGCTGAAGATAAAGAAACTCTGAAGAAGCAGCTCCAGCTACC  
AAAAGCGAAGGGAAGAGAAAAGGAGAGGAGGTAGATGGAAATGCGACTGTGAAAAAGAAG  
CAGAAAAAAGAGAAAGAGAAGGAATCAAAGCAGGAAAAACAGCTGAAGGAACAGACAGAG  
CTGATCTGGGGCATCAAGGACGAGCTGAGGAAGGTCTGCTCCACTAATGACCTGAAAGAG  
CTGCTGATTGCCAACAAAGCAGGAAGTGCCTTCAGGGGAGAACGCCATCTTGACCGAGTG  
GCAGATGGGATGGCATTGGAGCTCTGCTTCCCTGTGAGGAGTGAAAGGGCAGTTTGTG  
TTCAAGAGCGATGCATATTACTGTTTCAGGGGACATCACTGCCTGGACTAAGTGCCTTCT  
AAAACACAGACTCCCAACAGGAAAGACTGGGTAATCCCGAAGGAGTTTCGTGAAATTCCT  
TACCTCAAGAAATTAAGTGAAGAAACAGGATAGGATATCCCTCCAGAGGCTGCAACT  
GTGAACTCTGCGCTTCTCCACATGCATCTGCTCCTTTGACAGAGACCGTTTCTGCACCC  
CAAGACAAACCACTGGCCAACATGAAGATCCTGGCTCTTGAAAGCTGTCCAAGAACAAG  
GAGGAAGTGAAGAACATCGTGGAGGAGCTGGGAGGAAAGATGACGACGACAGCTAACAAG  
GCCACGCTGTGCATCAGCACACAGAAGGATTTGGAGAAAATGAGCAAGAAGATGGAAGAA  
GTGAAGGAGGCCAAAGTCCGTGTGGTCTCAGAGGCATTTCTCAGNNGCTGAAATCCTCC  
AGCAAGAGCTTTCAGGAGCTTCTTTCTGTCCATGCAATTCACCTTGGGGTGCAGAGATA  
AAAATGGAGCACCATGAGGTGGCCGTGGATGGGAAATGCAGCAAGCCCCAGCATAACGAAG  
AGTGCTGGGAAGGTCAAAGAACAAGGACCTAGCAAGTCTGAAAAGAAAATGAAGCTA  
ACAGTTAAAGGTGGAGCAGCAGTAGATCCTGATTCTGGTTTGGAGGATTCTGCTCATGTG  
TTTGAAAAAGGTGGAAAGATCTTCAGTGAACCTTGGTCTAGTAGATATTGTGAAAGGA

ACGAATTCCTATTACAAACTGCAGCTCCTAGAGGATGATAGAGAGAGCAGGTAAGTGGGTG  
TTTAGATCCTGGGGTCGTGTGGGCACTGTAATTGGGAGTAACAAGCTGGAGCAGATGCCA  
TCAAAAAGAAGATGCTGTTGAACACTTCTTAACCTGTATGAAGAGAAAACCGGCAATTCG  
TGGCATTGGAAGAACTTCACTAAATATCCCAAAAAGTTCTACCCACTGGAAATAGATTAT  
GGACAGGATGAAGAAGCTGTCAAGAACTCACAGTGGGTGCTGGGACTAAATCAAACTT  
GCTAAGCCAATCCAAGACCTTATTAAGATGATCTTTGATGTGGAGAGCATGAAGAAAGCA  
ATGGTGAATTTGAGATTGACCTGCAGAAGATGCCACTGGGAAAAGTGGAGCAAGCGACAG  
ATCCAGAGTGCATACTCCATCCTTAATGAGGTTGAGCAGGCAGTTTCTGACAATGGTTCT  
GAATCTCAGATCTTGGATCTCTCAACCGCTTCTATACTCTGATTCCTCATGACTTCGGA  
ATGAAGAAACCACCTCTCTAAATAACTTAGAATACATTCAGGCTAAAGTGCAGATGTTG  
GACAACCTGCTTGATATTGAGGTTGCTTACAGCCTTCTAAGAGGTGGGAATGAAGATGGA  
GATAAAGACCCAATTGACATCAACTACGAAAAGCTCCGAACTGATATTAAGTTGTTGAC  
AAAGATTCAGAGGAAGCCAAGATTATTAACAATATGTGAAAAATACCCATGCTGCTACT  
CACAATGCATATGACCTCAAAGTTGTGGATATCTTCAGGATTGAGCGTGAAGGAGAGAGT  
CAGCGCTACAAGCCCTTAAGCAGCTTATAACCGCCAGCTGCTGTGGCATGGCTCCCGC  
ACCACCAACTTTGCTGGTATCCTCTCGCAGGGTCTCCGGATAGCTCCCCCTGAAGCTCCT  
GTGACTGGCTACATGTTTGGGAAAGGCATCTATTTTGCAGACATGGTGTCCAAGAGTGT  
AACTACTGTCACACATCTCAAGCTGATCCCATCGGGTTAATACTACTGGGAGAAGTTGCA  
CTTGGAAACATGTATGAGCTAAAGAATGCTTCTCACATAACAAAATTGCCAAGGGAAAA  
CACAGTGTGAAAGGCTTGGGCAAAACTGCACCTGATCCACAGCTACTACCAGCCTTGAT  
GGTGTGGAGTTCCCTTAGGGAATGGAATCTCAACAGGAATTAATGATACCTGTCTTCTA  
TATAACGAATACATTGTGTATGATGTTGCTCAGGTAAATCTGAAGTACCTGCTGAAACTG  
AAATCAACTATAAGACATCACTCTGG

>Flycatcher\_PARP1

ATGAAATCACCCATGTTTGTATGGCAAAGTCCCTCACTGGCACCCTACAGCTGCTTCTGG  
AAGCGGGCTCGAATTGTGTCCACACAGACATTGATGGCTTCTCTGAGCTTCGGTGGGAA  
GATCAGGAGAAAATCAAGAAAGCCATTGAAACTGGAGGCCCTGGAGGAGAAAAGGAGGG  
GAGCAGGAAGGAGGTGTAAGGCTGAGAAGAGCCTAAATGACTTTGCTGCAGAATATGCC  
AAGTCTAACAGAAGTACTTGCAAAGGCTGTGAGCAGAAAATAGAAAAGGGCCAGATCCGG  
ATTTCCAAGAAGATGGTGCATCCTGAGAAGCCACAGCTGGGAATGATAGATAACTGGTAC  
CACCCGAGTGCTTTGTGAGCCGCCGAGCAGAGCTGGGCTTCTCCCGCCTACGGGGCC  
ACCCAGCTCCTGGGCTTCAAGCTGAGGATAAAGAACTCTGAAAAGCAG  
CTCCAGCTACCAAAAAGTGAAGGAAAGAGAAAAGGAGAGGAGGTAGATGGAATGCGACA  
GCGAAAAAGAAAGCCGAAAAAAGAAAAAGAGAAAGAATCAAAGCATCAAAAACAGCTGAAG  
GAGCAGACAGAGCTGATCTGGGGCATCAAGGATGAGCTGAGGAAGTCTGCTCCACCAAT  
GACCTGAAAGAGCTGCTGATTGCCAACAAGCAGGAGGTCCCCTCAGGGGAGAATGCCATC  
TTGGACCGAGTAGCAGATGGGATGGCATTGAGGCTCTGCTGCCCTGCCAGGAGTGCAAG  
GGGCAGTTTGTGTTCAAGAGTGACGCTTACTGTTTCAAGGGATATCACTGCCTGGACC  
AAGTGCCTGGCTAAAACACAGACTCCCAACAGGAAAGACTGGATAATCCCAAAGGAGTTC  
CGGGAAATTCCTTACCTGAAGAAATTCAAATGTAAGAAGCAGGACAGAGTGTTCCTCCA  
GATGCTGCAACTGTGAACTCGGCCCTCCTCTTCTGCATCTGCTCCTTTGTCAGAGACT  
GTGTCTGCACCCAGAGACAAACCACTGACCAACATGAAGATCCTGGTTGTCGGGAAGCTG  
TCAAAGAACAAGAGGAGGTGAAAAACATTGTGGAGGACCTGGGAGGAAAGATGACAACA  
ACAGCTAACAAGGCCACCCTGTGCATCAGCACCCAGAAGGATGTGGAGAAAATGAGCAAG

AAGATGGAAGAAGTGAAGGAGGCCAAAGTCCGTGTGGTCTCAGAGGCATTTCTTCAGGAT  
GTGAAATCTTCCAGCAAGGACTTCCAGGAGCTTGTGTCTCTCCATGCCCTGTCACCTTGG  
GGTGCAGAGGTGAAAATGGAGATTGAGGAAATGGCTGTGGATGGAAAAGAGCAGCAAGCCC  
CCAAGCACAAAAGCACTGGGAAGGTCAAAGAACAAGGACCTAGCAAGTCTGAAAAG  
AAAATGAAGTTAACAGTGAAGGGTGGAGCAGCAGTAGACCCTGATTCTGGTTTGGAGGAT  
TCTGCTCATGTCTTTGAAAAGGTGGGAAAATTTTCAGTGCAACCCTGGGACTAGTAGAT  
ATTGTGAAAGGAACAAATTCCTATTATAAACTGCAGCTGCTAGAGGATGACAGAGAGAAC  
AGATACTGGGTGTTCCGATCCTGGGGCCGTGTGGGCACTGTGATCGGCAGTAACAAGCTG  
GAGCAGATGCCATCAAAGAAGATGCCATTGAACACTTCTGAATTTGTATGAAGAGAAA  
ACTGGCAATTCTTGGCATTCAAAGAACTTCACTAAATATCCAAAAAATTTTACCCACTG  
GAAATAGATTATGGACAGGATGAAGAAGCTGTCAGGAACTGACAGTAGGTGCTGGGACA  
AAATCAAACTCGCTAAGCCAATCCAAGATCTTATTAAGATGATCTTTGATGTGGAGAGC  
ATGAAGAAAGCAATGGTGAATTTGAGATTGACTTGCAGAAGATGCCATTGGGAAAACCTG  
AGCAAGAGACAGATCCAGAGTGCATACTCCATCCTGAATGAGGTTCCAGCAGGCAGTTTCT  
GACAGTGGTTCAGAATCTCAGATTTTGGACCTCTCCAACCGCTTTTATACACTGATTCT  
CATGACTTTGGGATGAAGAAGCCACCTCTCCTGAATAACTTGAATACATTCAGGCTAAA  
GTGCAGATGTTGGACAACCTGCTTGATATTGAGGTTGCTTACAGCCTTCTCAGAGGTGGA  
AATGAAGATGGAGATAAAGACCCAATTGACATCAACTATGAAAACTTAAAAACAGATATT  
AAGGTTGTTGACAAAGATTCAGAAGAAGCCAAGATTATCAAACAATATGTGAAGAACACT  
CATGCTGCTACACACAATGCATATGACCTCAAAGTCGTGGAAATCTTCAGGATTGAGCGT  
GAGGGGGAGAGCCAGCGTTACAAGCCCTTCAAGCAGCTCCACAACCGCCAGCTGCTGTGG  
CACGGCTCCCGCACCACCAACTTCGCCGGGATCCTCTCGCAGGGTCTGCGGATAGCTCCG  
CCTGAAGCTCCTGTGACCGGTACATGTTTGGGAAGGGCATCTATTTTGAGACATGGTA  
TCCAAGAGTGCGAACACTGTACACATCTCAAGCTGATCCCATAGGTTTAGTTCTTCTG  
GGAGAAGTTGCCCTTGGAAATATGTATGAATTAAGAATGTTCCACATCACAAAATTG  
CCCAAGGGAAAAACACAGTGTAAGGCTTGGGCAAAACCGCACCTGATCCCACAGCCACT  
ACCACCCTTGGTGTAGTAGAGGTTCCCTTAGGGAATGGGATCTCCACAGGAATCAATGAT  
ACCTGTCTTCTGTATAATGAATATATTGTGTATGACGTTGCTCAGGTAAATCTGAAGTAC  
CTGTTGAAACTGAAATCAACTATAAGACGTCACCTCTGG

>Fruitfly\_PARP1

ATGGATATTGAATTACCTTATCTTGCTGAGTATGCAAGAAGTGGACGAGCCACTTGCAA  
GGATGTAAAAGTACTATATCTAAAGATACTCTTCGGATTGCTGTCATGGTTCAATCTGCA  
TTTCATGATGCCAAAGTCCGAATTGGTTTCATAAAACCTGCTTTTTTAAAACAGCGT  
CCCAGCTCAGTAGGAGACATACAAAACATTGGAAATCTCCGATTTGCCGATCAAAGGAA  
TTAACGGATCTTGTGGAAAATATACAAGAAGTTATAAGCGCACAAATTAGGAAAAAAGCGA  
TCGAAGGCTTTTAACTTAGCATTAAAAGACTTTGGGATTGAATATGCAAATCTAGTCGA  
TCGACGTGTCGTGGATGTGAACAAAAATAAACAAGGATCTAGTTCGCTTACGTAAAAC  
GTTTATGATACTGAAGTTGGTATGAAGTACGGAGGCCAACCTTTGTGGCATCATTTGGAA  
TGCTTCGCCAATTGCGCTCTGAGCTTGGCTGGTTTGCCTCAGGTGAAGATATGCCAGGA  
TTTCAGAGCTTAGCAGATGATGATCAAGCGAAAGTTAAAACGCCATACCACCAATAAAA  
TCTGAAGAACTACCAGATACAAAAGAGCTAAGATGGAATTATCAGATACAAATGAAGAA  
GGAGAAAAGAAACAACGCTTAAAAGATCAAATGATGCCTACTTCAGGTTTCGCGATGAC  
ATAAAAATAAAATGAAGAAGAAAGACATTGATATACTTCTAAAGTTAATAATCAACAA  
CCTGTAAGTGGTGACACAGAAAAGTTATTTGATCAAACCTGCCGATTTACTGACATTCGGA

GCTATTGAATCATGTTCTGAATGCAACAGCTGTCAGTTTATTGTTAATAAATCTGGATAT  
ATATGTAATGGAAATCATTCTGAGTGGACCAAATGTAACAAGCTGCTAAAAGAGCCAACA  
AGATCGGCATGCATAGTGCCAAAAGAAGCTTAAAGCATTATATAATTTTTTGAATACCGTG  
AAAGAAATCCATCTACACGGATCTTTAATAACTTTCTCCCAATAAAAGTACCTTTTCT  
AGAAGTCTTTTGAACGAATAAAAACAATGATGTTTTGGTTAGCCAACAATACCTCGT  
ATAAGTCCGCCATTATACAATTTAAAGTTTTCAATTATAGGCTTAAAGAACCAGCATAAA  
GAGCTAAGAAAGCGAATAGAAAATTTGGGCGGTAAATTTGAAGTTAAAATATCGGAAAAC  
ACGATAGCAATAATATCAACAGAATTAGAAATACAAAAAAATCCACCCGTATGAAGTTT  
GCAGAAGAGCTCGGAATTCATATTGTGCCATTGAATTTTTAGATTTTGTGAAGCCGAT  
ACAGAAGGAGCTATTAATATATAAATAGCACATGATTTGTAGTTGGGGAACAGATCCA  
AAATCCAGAATCCAAAGGAAACAACAAAAAGTTTAAATTCGAACAGTATATACAAAA  
TCCATGCCAGTATCACGGACATTTAAAGTAAAGATGGCCTAGCTGTTGATCCGGACAGT  
GGGCTCGAGGACATCGCCCATGTTACGTGGACAGTAACAATAAATACAGTGTGTTCTT  
GGCTTAACTGACATTCAGAGAAATAAGAAGTCTACTACAAAGTTCAGCTTTTAAAGCG  
GATAAAAAGGAGAAATATTGGATTTTTCGTTCATGGGGTGAATTGGAACAAATATTGGA  
AACTCAAACTTGAAGAGTTCGACACGAGCGAGTCTGCAAAAAGAAATTTTAAAGAAATA  
TATGCAGATAAACTGGAAATGAATACGAGCAACGAGATAACTTTGTTAAAAGAACAGGT  
CGAATGTACCCAATCGAAATTCATATGATGATGACCAAAAGTTGGTAAAACACGAAAGC  
CATTTCTTACTTCCAAATTAGAGATTTCTGTGCAAAATTTAATAAAGCTGATTTTTGAT  
ATTGACTCAATGAATAAAACATTGATGGAATTCATATCGACATGGATAAAATGCCGCTG  
GGCAAGCTCAGTGCTCATCAAATCCAATCTGCTTACAGAGTAGTGAAGGAAATTTATAAT  
GTACTAGAATGTGGTTCCAATACTGCAAACTTATTGATGCAACAAATAGTTTTTATACG  
TTAATTCCTCATAATTTTGAGTTCAATTACCAACATTAATTGAAACACATCAACAAAT  
GAAGATTTGCGACAAATGCTTGATTCATTAGCTGAGATAGAGGTTGCGTACAGTATAATC  
AAAAGCGAAGATGTATCTGATGCTTGAATCCTTTAGATAATCATTACGCACAGATTA  
ACTCAGTTGGTGGCATTAGACAAAAATAGTGAAGAATTTTCGATTCTTAGCCAGTACGTA  
AAAAACACTCATGCATCTACCCACAAATCTTATGATTTAAAATTTGTTGATGATTTAA  
GTATCTCGCCAAGGAGAAGCAAGGCGCTTTAAACCATTTAAGAAGCTACATAACAGAAAA  
TTATTATGGCACGGATCACGTTTAACTAATTTGTTGGTATATTATCGCATGGTTTAAAG  
ATTGCTCCCCAGAAGCGCCACCAACAGGTTATATGTTTCGGAAAAGGCATTTATTTTGGC  
GATATGGTTTCAAATCCGCAAATTTGTTGCACAAGTCAACAAAATCTACTGGATTA  
ATGCTTCTATCTGAAGTTGCTTTGGGCGATATGATGGAATGCACTTCAGCGAAATACATT  
AATAAACTATCAATAATAACATAGTTGTTTCGGTTCGTGGTTCGACCATGCCAGATCCT  
ACTAAGAGCTATATAAGAAGTATGGGGTTGAAATTCCTTACGGAGAAACCATTACTGAC  
GAACATTTAAAGTCATCGTTATTATATAACGAGTATATAGTATATGATGTTGCGCAGGTC  
AATATTCAATATTTGTTTCGTATGGAATTCAGTATTCTTAT

>Fugu\_PARP1

ATGTCGGAATCTCAGAACGACAAGCTCTACAAAGCGGAATATGCCAAGAGCGGCCGCGCC  
TCGTGTAATAAATGCAAAGAAAACATAGCCAAAGACTCGCTGAGGATGGCCATCATGGTG  
CAGTCCCCCATGTTTATGTTGGGAAAGTCCCGCACTGGCACCCTTCTCGTGCTTCTGGCAG  
CGAGCAGCAGCTCAATCGACTTCCGACATTGATGGGTTTTCCGGCCTGCGTGGGAGGAC  
CAGGAGAAGATCAAGAAGGCCGTCGAAAGCGGGGGCGCGACGGGAGCAGGAGGAACGGAC  
TCAAAGAGTGGAGCGAAAGAAGAGAAGACATTAACGAATTTGCGGTGCAATATGCCAAA  
TCGAACCGAAGCACATGCAAAGGTTGTGAGCAGAAAATAGAAAAGGATCAGATTCGGGTG



TCAAAGAAATCCGTTGACCCGGAGAAACCGCAGCTCGGCCTGATTGACCGCTGGTACCAC  
ACAGCGTGCTTCGTGAGCTGGAGGGAGGAACTGGTCTTCAAACCCGAGTACAACGCCTCC  
CAGCTGAAGGGATTACAGCAATCTACGGGCAGAAGACAAGGAGGAACTTAAGAGGAAGCTC  
CCATCAATCAAAACGGAAGGGAAGCGCAAATCCGATGAGGTGGACGGCGTCTCAAAGAAA  
AAGAAGAAGGAGGAGGAGGAAGAGAGGAAGAAGCTGGAGGAGCAGCTGAAGACTCAAAGT  
CAGCTCATTTGGGGAATTAAGGACAAGTTGAACAGATTCTGTTCCATTAATGACATGAAA  
GAGCTGCTGATTGCAAATGGCCAGGATGTTCCCTTCAGGAGAGTCCAATGTGTTGGACTGC  
CTGGCTGATGGCATGTCTTTGGTGCCCTTGAGCCCTGCAGTGAGTGTACTGGCCAGTTG  
GTGTTCAAGGGCGATGCTTATTACTGTACAGGCAACATCTCAGCCTGGACAAAGTGCCTT  
AACAGACCACCACACCCAAACGCAAAGACTGGGTGACCCCAAGGAATTCCATGAAATT  
TCCTTCCTGAAGAAATTAAGTTCAAGAGACAGAACAGGATTTACCCCAAAGAAGCTCCG  
CCCCAAACAGTCAGTGCGGTCAAACCTGAATCCTTAGCCAGTGCATCCAGCGTCCCGATG  
AGTCTGCCAGAGGGAGCGCCTCCAGACAAGCCTCTCACTGGCATGAAGCTGGTGGCTGTG  
GGCAAGCTGAGCAAGAACAAGGATGACATTAAGGCTGCTGTGGAGGAGCTGGGTGGGAAAG  
ATCACTGGAACAGCCAACAAGGCCTCGCTCTGCTCAGCTCTAAGAAGGAGCTGGAGAAG  
ATGACAAAGAAAATGGAAGAAGTGAAAGATGCAGGGGTGCGCGTGGTCTCCGAAGACTTC  
CTCACAGATATCAAGTCGTCGGGTAAAGACCTTCAGGAGCTGGTGTCCCTGCACACCATC  
TCTCCCTGGGGGGCAGAGGTCAAAGTGAGAGTCAAGGCACAGCCCGTGGCTTCAAAGTCA  
GGGGCAATGGCCGCAAGAGCACGGGCAAGGTCAAAGAAGAAGAAGGTGGAAGCAAAAGC  
AAGAAGATGAAACTAACTGTGAAAGGTGGAGCTGCTGTGGATCCAGATTCAGGTCTGGAA  
AACAGTGACATGTCTTGAGCAGGGCGGAAAGATGTACAGCGCCACACTGGGTTTGGTG  
GACATCGTCAGAGGAACCAACTCTACTACAACTACAGCTGCTGGAGGACGATGTTTCAAG  
AAGAGGTACTGGGTGTTTCAAGTCTGGGGCAGAGTGGGCACCACCATCGGAGGCAACAAG  
CTGGACAAGTTCAGTGACAAGAACTCTGCCATGAACAACCTTCTGACCGTCTACAAAGAG  
AAGACTGGTAACGAGTGGAGCTGCTCCAATTTACCAAATATCCCAACAAGTTCTACCCC  
CTGGAGATCGACTATGGACAGGATGAGGAAGCAGTGAAGAGGTTGACGGCCACAGCAGGG  
ACCAAGTCCAAGCTGGCCAAACCCATACAGGAGCTGATCAAGATGATCTTCGATGTGGAG  
AGCATGAAGAAGGCCATGGTGGAGTTTGAAGTACCTCCAGAAGATGCCGCTGGGGAAG  
CTGAGTAAGAGGCAGATCCAGAGCGCGTATGCTCTCCTCACTGAAGTCCATCAGGCTGTG  
TCAGACTCACTGCCGAGGCCAGATATTGGATCTGTCCAATCGTTTCTACACCTTGATC  
CCTCACGACTTCGGTATGAAGAAACCACCGCTGCTCAACAATCTGAACTACATTCAGGCG  
AAGGTTTCAAGTGTGGACAACCTGCTGGACATCGAGGTGGCGTACAGCCTACTGAGAGGA  
GGGGCCCAGGACAACGAGAATGACCCCATCGACATCAACTATGAGAACTCAAAACAAA  
ATCGAGGTGCTTGACAAGTCTGCCAAGGAGGCTGATATTATCCTGCAGTATGTCAAGAAC  
ACCCACGCTGCCACACACAACACCTACACACTGGAAGTGCAAGAAATCTTCAAAATACGG  
CGAGAGGGGGAGCACCAGCGTTACCGTCCATTGAAGAGTTGCACAACCGGCAGCTCCTG  
TGGCAGGCTCTCGCGCCACCAACTACGCAGGTATAATGTCTCAGGGTCTCCGCATCGCC  
CCGCCAGAGGCTCCAGTGACGGGTACATGTTCCGGCAAAGGTGTGTAAGTTTGGCCGACATG  
GTGTCCAAGAGTGCAAACACTGTACACTTCCCAGTCAAGAACCCGTAGGTTTCTGCTG  
CTGGCTGAGGTGCGCCCTCGGCAACATGCACGAACTGAAAAAGGCCTCACACATTACAAA  
CTACCCAAAGGAAAACACAGCGTTAAAGGTTTGGGAAGAACCGCCCTGATCCAAGTGCC  
ACTGTCACTCTGGACGAGTGCAAGTGCCTCTGGGAAATGGAGTCAACACAAACATAGAT  
GACACCAGTCTGTTGTACAACGAGTATATCGTGTATGATGTCGCACAGATAAACTTAAAG  
TATCTCCTGAAGGTCAGATTTAATTATCAGACGTCCCTGTGG

>Horse\_PARP1

ATGTTTCGATGGAAAAAGTCCCACACTGGTACCACTTCTCCTGCTTCTGGAAGGTCGGCCAC  
TCCATCCGGCACCCTGACGTTGAGGTGGATGGGTTCTCGGAGCTGAGGTGGGACGACCAG  
CAGAAGGTGAAGAAAAGTGCAGAGGCCGGAGGCGTGGCAGGCAAAGGCCAAGGTGGGTCT  
GGCAGCAAGGCGGAGAAGACGCTGGGCGACTTTGCGGCTGAGTACGCCAAGTCCAACAGG  
AGCACGTGCAAGGGCTGCATGGAGAAGATAGAAAAGGGCCAGATGCGCCTGTCCAAGAAG  
ATGCTGGACCCAGAGAAGCCCCAGCTGGGCATGATCGACCGCTGGTACCACCCAAACTGC  
TTCGTGAAGAACC GGAGGAGCTGGGGTTCCGGCCCGAGTACAGCGGAGCCAGCTCAAG  
GGCTTCAGCCTCCTGTCTCCGGAGGATAAAGAAGCCCTGAAGAAGCAGCTCCCGGGAGTC  
AAGACTGAAGGAAAGAGAAAAGGCGATGAGGTGGATGGAGTAGACGAAGTGGCCAAGAAG  
AAATCTAAGAAAGAGAAGGACAAGGACAGTAAGCTGGAAAAGGCCCTCAAGGCCCAGAAT  
GACCTGATCTGGAACATCAAGGACGAGCTAAAGAAAGCGTGTTCACCAACGACCTGAAA  
GAGCTGCTCATTTCAACAAGCAGCAAGTGCCATCCGGGGAGTCAGCGATCTTGACCCGC  
GTGGCTGATGGCATGGTGTGGTGGTCCCTCCTTTCCTTGCAGGAATGCTCAGGCCAGCTG  
GTCTTCAAGAGCGATGCGTATTACTGCACTGGGGACGTCCTGCCTGGACCAAGTGTATG  
GTCAAGACACAGACACCCAACCGGAAGGAATGGGTCACCCCAAAGGAATTCCGAGAAATC  
TCTTACCTCAAGAACTGAAGATCAAAAAGCAGGACCGGATATTCACCCAGAGACCAGC  
GCCCCAGCGCAGCAGCACCCCCGCCCTCCGCGGTCTCAGCACCCGCCACTGTGAACGCC  
TCTGCTCTGCCAGACAAGCCGTTATCCAACATGAAGATCCTGACTCTTGGGAAGCTCTCC  
CGGAACAAGGATGAAGTGAAGGCCATGATCGAGAAACTGGGGGAAAGTTGACAGGCACA  
ACCAGCAAGGCCTCCCTGTGCATCAGTACCCAAAAGGAGGTGGAAAAGATGAATAAAAAG  
ATGGAGGAAGTGAAGAGGCCAACCTCCGCGTTGTGTCTGAGGATTCCTGCAGGACGTC  
TCCACCTCCACCAAGAGCCTTCAGGAGTTGCTCTCAGCCACATCTTGTCACCCCTGGGGG  
GCCGAGGTGAAAGCGGAGCCTGTGGAAGTAGCGGCCCAAGAGGGAAGTCAGGGGCAGCG  
CTCCCAAGAAGAGCAAGGGCCCTGTCAAGGAGGAAGGAAGCAACAAATCTGAAAAGAGA  
ATGAAATTAACCCTTAAAGGAGGAGCAGCTGTGATCCTGATTCTGGTCTGGAACATTCT  
GCACACGTCTGGAGAAGGGTGGGAAGGTCTTCAGTGCCACCCTCGGCCTGGTGGACATC  
GTGAAAGGAACCAACTCCTATTACAAGCTGCAGCTGCTGGAGGATGACAAAGAAAGCAGG  
TACTGGATATTCAGGTCTGGGGCCGTGTGGGCACAGTGATTGGTAGTAACAAGCGGGAG  
CAGATGCCGTCCAAGGAGGATGCCATTGAGCACTTTATGAAATTATACGAAGAGAAAAGT  
GGGAATGCCTGGCACTCCAAAAGTTCACAAAAGTATCCAAAAGTTCTACCCCTGGAG  
ATTGACTACGCCAGGATGAAGAGGCGGTGAAGAAGCTGACGCTAAACCCTGGCACCAAG  
TCCAAGCTCCCAAGCCGGTGCAGGAGCTCATTAAAGATGATCTTTGATGTGGAAAAGTATG  
AAGAAAGCCATGGTGGAGTATGAGATTGACCTTCAGAAGATGCCCTTGGGGAAGCTGAGC  
AAGAGGCAGATCCAGGCCGCTACTCCATCCTCAGTGAGGTCCAGCAGGCGCTGTCCCAG  
GGCAGCGGCGACTCCAGATCCTGGATCTCTCAAACCGCTTCTACACCCTGATCCCCAC  
GACTTTGGGATGAAGAAGCCTCCGCTCCTGAACAACACAGACAGTGTGCAGGCCAAGGTG  
GAAATGCTGGACAACCTGCTGGACATCGAAGTGGCCTACAGCCTGCTCAGGGGTGGGTCT  
GATGATAGCAGCAAGGACCAATTGACGTCAACTATGAGAAGCTCAAAAAGTACATTAAG  
GTGGTGGACAAAGATTCCGAGGAAGCCGAGACCATCAGGAAGTACGTAAAGAACACGCAC  
GCAACCACACACAATGCGTATGACCTGGAAGTCGTTGATATCTTTAAGATAGAGCGCGAA  
GGGAGAGCCAGCGTTACAAGCCCTTAAGCAGCTGCATAACCGGAGGCTGCTGTGGCAC  
GGCTCCAGGACCACCAACTTTGCTGGGATCCTGTCCAGGGTCTCCGGATAGCCCCACCT  
GAAGCGCCTGTGACAGGCTACATGTTGGTAAAGGGATCTATTCGCTGACATGGTCTCC

AAGAGCGCCAACTACTGCCACACGTCTCAGGGAGACCCGATAGGCTTAATCTTGCTGGGG  
GAAGTTGCCCTTGGGAACATGTATGAACTGAAGCATGCGTCGCACATCAGCAAGTTACCC  
AAGGGCAAGCACAGCGTCAAAGGTTTGGGCAAACCACCCCTGACCCCTCAGCCAGTGTT  
ACTATGGATGGCGTGGAGGTGCCCTGGGGACTGGGATTCGTCGGGGGTGAGCGACACC  
TGCCTGCTGTATAATGAGTACATTGTCTATGATATTGCTCAGGTAAATCTGAAGTATCTG  
CTGAAGCTGAAGTTCAATTTAAGACGTCCCTCTGG

>Human\_PARP1

ATGGCGGAGTCTTCGGATAAGCTCTATCGAGTCGAGTACGCCAAGAGCGGGCGGCCTCT  
TGCAAGAAATGCAGCGAGAGCATCCCCAAGGACTCGCTCCGGATGGCCATCATGGTGCAG  
TCGCCATGTTTGTATGGAAAAGTCCCACACTGGTACCACTTCTCCTGCTTCTGGAAGGTG  
GGCCACTCCATCCGGCACCCCTGACGTTGAGGTGGATGGGTTCTCTGAGCTTCGGTGGGAT  
GACCAGCAGAAAGTCAAGAAGACAGCGGAAGCTGGAGGAGTGACAGGCAAAGGCCAGGAT  
GGAATTGGTAGCAAGGCAGAGAAGACTCTGGGTGACTTTCAGCAGAGATGCCAAGTCC  
AACAGAAGTACGTGCAAGGGGTGTATGGAGAAGATAGAAAAGGGCCAGGTGCGCTGTCC  
AAGAAGATGGTGGACCCGGAGAAGCCACAGCTAGGCATGATTGACCGCTGGTACCATCCA  
GGCTGCTTTGTCAAGAACAGGGAGGAGCTGGGTTTCCGGCCGAGTACAGTGCGAGTCAG  
CTCAAGGGCTTCAGCCTCCTTGCTACAGAGGATAAAGAAGCCCTGAAGAAGCAGCTCCCA  
GGAGTCAAGAGTGAAGGAAAGAGAAAAGGCGATGAGGTGGATGGAGTGGATGAAGTGGCG  
AAGAAGAAATCTAAAAAAGAAAAAGACAAGGATAGTAAGCTTGAAAAAGCCCTAAAGGCT  
CAGAACGACCTGATCTGGAACATCAAGGACGAGCTAAAGAAAGTGTGTTCAACTAATGAC  
CTGAAGGAGCTACTCATCTTCAACAAGCAGCAAGTGCCTTCTGGGGAGTCGGCGATCTTG  
GACCGAGTAGCTGATGGCATGGTGTTCGGTGCCCTCCTCCCTGCGAGGAATGCTCGGGT  
CAGCTGGTCTTCAAGAGCGATGCCTATTACTGCACTGGGGACGTCCTGCTGGACCAAG  
TGTATGGTCAAGACACAGACACCCAACCGAAGGAGTGGGTAACCCCAAAGGAATCCGA  
GAAATCTTACCTCAAGAAATTGAAGGTTAAAAACAGGACCGTATATTCCCCCAGAA  
ACCAGCGCTCCGTGGCGGCCACGCCTCCGCCCTCCACAGCCTCGGCTCCTGCTGCTGTG  
AACTCCTCTGCTTCAGCAGATAAGCCATTATCCAACATGAAGATCCTGACTCTCGGGAAG  
CTGTCCCGGAACAAGGATGAAGTGAAGGCCATGATTGAGAAACTCGGGGGGAAGTTGACG  
GGGACGGCCAACAAGGCTTCCTGTGCATCAGCACCAAAAAGGAGGTGGAAAAGATGAAT  
AAGAAGATGGAGGAAGTAAAGGAAGCCAACATCCGAGTTGTGTCTGAGGACTTCTCCAG  
GACGTCTCCGCCTCCACCAAGAGCCTCAGGAGTTGTTCTTAGCGCACATCTGTCCCCT  
TGGGGGGCAGAGGTGAAGGCAGAGCCTGTTGAAGTTGTGGCCCAAGAGGGAAGTCAGGG  
GCTGCGCTCTCAAAAAAAGCAAGGGCCAGGTCAAGGAGGAAGGTATCAACAAATCTGAA  
AAGAGAATGAAATTAACCTCTAAAGGAGGAGCAGCTGTGGATCCTGATTCTGGACTGGAA  
CACTCTGCGCATGTCTTGAGAAAAGGTGGGAAGGTCTCAGTGCCACCCTTGGCCTGGTG  
GACATCGTTAAAGGAACCAACTCTACTACAAGCTGCAGCTTCTGGAGGACGACAAGGAA  
AACAGGTATTGGATATTCAGGTCCTGGGGCCGTGTGGGTACGGTGATCGGTAGCAACAAA  
CTGGAACAGATGCCGTCCAAGGAGGATGCCATTGAGCACTTCATGAAATTATATGAAGAA  
AAAACCGGGAACGCTTGGCACTCCAAAAATTCACGAAGTATCCAAAAAGTTCTACCCC  
CTGGAGATTGACTATGGCCAGGATGAAGAGGCAGTGAAGAAGCTGACAGTAAATCCTGGC  
ACCAAGTCCAAGCTCCCCAAGCCAGTTCAGGACCTCATCAAGATGATCTTTGATGTGGAA  
AGTATGAAGAAAGCCATGGTGGAGTATGAGATCGACCTTCAGAAGATGCCCTTGGGGAAG  
CTGAGCAAAAAGGCAGATCCAGGCCGATACTCCATCCTCAGTGAGGTCCAGCAGGCGGTG  
TCTCAGGGCAGCAGCGACTCTCAGATCCTGGATCTCTCAAATCGTTTTACACCCTGATC

CCCCACGACTTTGGGATGAAGAAGCCTCCGCTCCTGAACAATGCAGACAGTGTGCAGGCC  
AAGGTGGAAATGCTTGACAACCTGCTGGACATCGAGGTGGCCTACAGTCTGCTCAGGGGA  
GGGTCTGATGATAGCAGCAAGGATCCCATCGATGTCAACTATGAGAAGCTCAAAACTGAC  
ATTAAGGTGGTTGACAGAGATTCTGAAGAAGCCGAGATCATCAGGAAGTATGTTAAGAAC  
ACTCATGCAACCACACACAATGCGTATGACTTGGAAGTCATCGATATCTTTAAGATAGAG  
CGTGAAGGCGAATGCCAGCGTTACAAGCCCTTAAAGCAGCTTCATAACCGAAGATTGCTG  
TGCCACGGGTCCAGGACCACCAACTTTGCTGGGATCCTGTCCAGGGTCTTCGGATAGCC  
CCGCTGAAGCGCCCCTGACAGGCTACATGTTTGGTAAAGGGATCTATTTGCTGACATG  
GTCTCCAAGAGTGCCAACTACTGCCATACGTCTCAGGGAGACCCAATAGGCTTAATCCTG  
TTGGGAGAAGTTGCCCTTGAAACATGTATGAACTGAAGCACGCTTCACATATCAGCAAG  
TTACCCAAGGGCAAGCACAGTGTCAAAGGTTTGGGCAAACTACCCCTGATCCTCAGCT  
AACATTAGTCTGGATGGTGTAGACGTTCTCTTGGGACCGGGATTTCATCTGGTGTGAAT  
GACACCTCTACTATATAACGAGTACATTGTCTATGATATTGCTCAGGTAAATCTGAAG  
TATCTGCTGAAACTGAAATTCATTTTAAAGACCTCCCTGTGG

>Macaque\_PARP1

ATGGCGGAGTCTTCGGATAAGCTCTACCGAGTCGAGTACGCCAAGAGCGGGCGGCCTCT  
TGCAAGAAATGCAGCGAGAGCATCCCCAAGGACTCGCTCCGGATGGCCATCATGGTGCAG  
TCGCCATGTTTGATGAAAAGTCCACACTGGTACCCTTCTCTGCTTCTGGAAGGTG  
GGCATTCCATCCGGCACCCCTGACGTGGAGGTGGATGGGTTCTCTGAGCTTCGGTGGGAT  
GACCAGCAGAAAGTCAAGAAGACAGCGGAAGCTGGAGGAGTGACAGGCAAAGGCCAGGCT  
GGAATTGGTAGCAAGGCAGAGAAGACGCTGGGTGACTTTGCAGCAGAGTATGCCAAGTCC  
AACAGAAGCACATGCAAGGGGTGTATGGAGAAGATAGAAAAGGGCCAGGTGCGCCTGTCC  
AAGAAGATGCTGGACCCGGAGAAGCCACAGCTAGGCATGATTGACCGCTGGTACCACCCA  
CACTGCTTTGTCAAGAACAGGGAGGAGCTGGGTTTCCGGCCCGAGTACAGTGCAGTCAAG  
CTCAAGGGCTTCAGCCTCCTTGCTGCAGAGGATAAAGAAGCCCTGAAGAAGCAGCTCCCA  
GGAGTCAAGAGCGAAGGAAAGAGAAAAGGCGATGAGGTGGATGGAGTAGATGAAGTGGCC  
AAGAAGAAATCTAAAAAAGAAAAAGACAAAGATAGTAAGCTTAAAAAGCTCTAAAGGCT  
CAGAACGACCTGATCTGGAACATCAAGGATGAGCTAAAGAAAGTGTGTTGACTAATGAC  
CTGAAGGAGCTACTCATCTTCAACAAGCAGCAAGTGCCTTCTGGGGAGTCGGCGATCTTG  
GACCGAGTAGCCGATGGCATGGCGTTCCGGTGCCTCCTTCCCTGCAAGGAATGCTCGGGT  
CAGCTGGTCTTCAAGAGTGTGCTTATTACTGCACTGGGGACGTCCTGCTGGACCAAG  
TGTATGGTCAAGACACAGACACCCAACCGAAGGAGTGGGTAACCCCAAAGGAATTCCGA  
GAAATCTCTTACCTCAAGAAATTGAAGGTTAAAAAGCAGGACCGTATATCCCCCAGAA  
ACCAGCGCCCCAGTGGTGGCCACGCCCCACCCTCCACAGCCTCGGCGCCTGCTGCTGGG  
AACTCCTCTGCTTACAGCAGATAAGCCATTATCCAACATGAAGATCCTGACTCTTGGGAAG  
CTCTCCCGGAACAAGGATGAAGTGAAGGCTATGATTGAGAACTCGGGGGGAAGTTGACA  
GGGACAGCCAATAAGGCTTCCCTGTGCATCAGCACCAAAAAGGAGGTGAAAAGATGAAT  
AAGAAGATGGAGGAAGTAAAGGAAGCCAACATCCGAGTTGTGTCTGAGGACTTCTCCAG  
GACGTCTCCGCCTCCACCAAGAGCCTCAGGAGTTGTTCTTAGCACACATCTTGTCCCCT  
TGGGGGGCAGAGGTGAAGGCAGAGCCTGTGCAAGTTGTGGCCCCAAAAGGGGAAGTCAGGG  
GCTGCACTCTCAAAAAAAGCAAGGGCCAGGTCAAGGAGGAAGGTATCAACAAATCTGAA  
AAGAGAATGAAATTAAGTCTTAAAGGAGGAGCAGCTGTGGATCCTGATTCTGGACTGGAA  
CACTCTGCGCATGTCTGGAGAAAGTGGGAAGGTCTCAGTGCCACCCTCGGCCTGGTG  
GACATCGTTAAAGGAACCAACTCTATTACAAGCTGCAGCTTCTGGAGGACGACAAGGAA

AGCAGGTATTGGATATTCAGGTCCTGGGGCCGTGTGGGGACGGTGATCGGTAGCAACAAA  
CTGGAACAGATGCCGTCCAAGGAGGATGCCATTGAGCACTTCATGAAATTATATGAAGAA  
AAAACCGGGAACGCTTGGCACTCCAAAAATTTCAAAAAGTATCCAAAAAGTTCTACCCC  
CTGGAGATTGACTACGGCCAGGATGAAGAGGCAGTGAAGAAGCTGACAGTAAATCCTGGC  
ACCAAGTCCAAGCTCCCCAAGCCAGTTCAGGACCTCATCAAGCTGATCTTTGATGTGGAA  
AGTATGAAGAAAGCCATGGTGGAAATATGAGATCGACCTCAGAAGATGCCCTTGGGGAAG  
CTGAGCAAAAAGGCAGATCCAGGCCGCGTATTCCATCCTCAGTGAGGTACAGCAGGCAGTG  
TCTCAGGGCAGCAGCGACTCTCAGATCCTGGATCTCTCAAATCGTTTTACACCCTGATC  
CCCCATGACTTTGGGATGAAGAAGCCTCCGCTCCTGAACAGTGCAGACAGTGTGCAGGCC  
AAGGTGGAAATGCTTGACAACCTGCTGGACATCGAGGTGGCCTACAGTCTGCTCAGGGGA  
GGGTCTGATGATAGCAGCAAGGACCCCATCGATGTCAACTATGAGAAGCTCAAACTGAC  
ATTAAGGTGGTTGGCAGAGATTCTGAAGAAGCCGAGATCATCAGGAAGTATGTTAAGAAC  
ACTCATGCAACCACACAATGCGTATGACTTGGAAAGTCATCGATATCTTTAAGATAGAG  
CGTGAAGGCGAATGCCAGCGCTACAAGCCCTTAAGCAGCTTCATAACCGAAGATTGCTG  
TGGCACGGGTCCAGGACCACCAACTTTGCCGGGATCCTGTCCCAGGGTCTTCGGATAGCC  
CCGCTGAAGCACCTGTGACAGGCTACATGTTTGGTAAAGGGATCTATTTGCTGACATG  
GTCTCTAAGAGTGCCAACTACTGCCATACGTCTCAGGGAGACCAATAGGCTTAATCGTG  
TTGGGAGAAGTTGCCCTTGAAACATGTATGAACTGAAGCACGCTTCACATATCAGCAAG  
TTACCCAAGGGGAAGCACAGTGTCAAAGGTTTGGGCAAACTACCCCTGACCCTCAGCT  
AGTATTAGTCTGGATGGTGTAGAGTTTCTCTTGGGACCGGGATTCATCTGGTGTGAAT  
GACACCTGTCTACTATATAACGAGTACATTGTCTACGATATTGCTCAGGTAAATCTGAAG  
TATCTGCTGAAACTGAAATTCATTTTAAGACCTCCCTGTGG

>Medaka\_PARP1

ATGGCCGACTCCCAGAATGACAAGCTGTTCCGAGCAGAGTACGCCAAAAGCGGCCAGGCT  
TCGTGCAAGAAATGCAAGGAGAAAATCGCGAAGGACTCGCTGAGGATGGCCATCGTGGTG  
CAGTCCCCATGTTGACGGGAAGGTCCCTCACTGGCATCACTTCTCCTGCTTCTGGCAG  
CGAGCCTCGGTGCAGTCCACGGCCGATGTCGGCGGGTTTTCGGATCTCCGCTGGGCGGAC  
CAGGAAGCTGTCAAAAAAGCCATAGAAAAGTGGTGGAGTGGCCGGAACAGGAAAGGAAAC  
TCTGGTGGTGCGGCTAAAGGAGAAAAGACGCTGAACGACTTTGCGGTGGAGTACGCCAAA  
TCAAACCGCAGCACGTGCAAAGGATGTCAGCAGAAAATAGAAAAGGATCAGATTCGTGTG  
TCTAAGAAAGTGGTGGATGCAGAGAAGCCTCAGCTGGGCCTGATCGACCGCTGGTACCAC  
ACTGCATGTTTTGTGAGCCGACAGAGAGGAGCTGGCTTCAAACCTGATTACAGCGCTGCT  
CAGCTGAAGGGATTCAATGTGCTGCGGGCAGAAGACAAGGAGGAGCTGAAGAAGAGGCTT  
CCTGCTGTAAAACTGAGGGAAAACGTCCAGGCGACGAGTTGGACGGAGTTTCAAAGAAG  
CTGAAGCAAGAAGAGGAGGAAGAGAATAAACAGTTGGTGGAGAATTTAAAGAATCAAAGT  
CAGCTAATTTGGGGGATTAAGGACAACTCAGGAAATACTGTTCAACCAACGACATGAAG  
GAGCTGCTGATTGCAAACGGTCAGGAAGTTCCTTCTGGGGAGTCCAACGTGGTGCACAGA  
GTGGCTGACGGTATGGCCTTCGGGGCTCTGGAGGCCTGTAACGAGTGCCAAGGTCAACTG  
GTGTTTAAAGGGGATGCGTATTACTGCACAGGAGACATCTCAGCCTGGACTAAGTGCCTG  
TTCAAACCTGCAACACCCCTGCGCAAAGACTGGATCATCCGAAGGAATCCATGAAGTT  
CCATTTTTGAAAAAGTTCAAGTTCAAGCGTCAAGACCGAGTTTATCCCAAAGAAGCTCCG  
ACCCAAACATTGACAACAGCTAAAGCTGAACCTCTGGCGAGTGGATCTGGAGCCCTGAAG  
GAGCAGCTGCCAGAAGGAGCACCTGCAGATAAACCTCTGACTGGAATGAAGCTGCTGGCT  
GTTGGAAAACCTGTCCAAGAACAAGGAGGAGCTGAAGGCTGAAGTGGAGGAGATGGGTGGA

AAGATCACCGGCTCAGCCAACAAGGCGTCTCTGTCTCAGCACCAAGAAAATGGGAAA  
AAGATGGAGGAAGTTCGGGACCCGGAGTGC GCGTGGTCTCTGAGGATTCCTCCTAGAC  
ATAAAGTCTTCAGGCAAAGCTCTTCAGGAGCTGGTCTCTGACGCCATCTCAACATGG  
GGCGTGGAGGTTAAAGTAGAGCCACAGGCTCCAGCTGCAGCCTCAAAGTCTGGAGCTCT  
GCTGCAAAGAGCAGCGGCAAGGTGAAGGAGGAAGAAGGTGGCAGCAAATCCAAGAAAATG  
AAGCTCACGGTCAAAGGTGGAGCTGCCGTGGATCCAGACTCAGGTCTTGAAAACAGCGCC  
CATGTCCTGGAACAGAGCGGGAAGATGTACAGTGCCACTCTGGGCTGGTGGACATCGTG  
AGAGGGACCAACTCTACTACAACTGCAGCTGCTGGAGGACGATCTGCAGAAAAGGTAC  
TGGGTGTTTCTAGATCATGGGGCAGAGTGGGTACCACCATCGGAGGAAACAACTGGACAAA  
TTCCATGACAAGAACTCGGCTTTGGATAATTTCTTAGTGTATAAAGAAAAGACGGGA  
AACGAATGGGGCTCGTCTAACTTTATCAAATATCCCACTAAGTTCTACCCACTGGAGATT  
GATTATGGACAGCAGGATGAGGAAGCCGTGAAGAGGCTGACGGCCTCTGCTGGCACCAAG  
TCCAAGCTTCCCAAACCCGTTTTCAGGAGCTGATTAAGATGATTTTTGATGTGGAGAGCATG  
AAGAAGGCCATGGTGGAGTTTGAATCGACCTCCAGAAGATGCCTCTGGGCAAGCTGAGT  
AAAAGACAAATTCAGAGCGCCTACGCTCTCCTCACTGAAGTCCAGCAGGCGGTGTCAGAC  
TGTGTGCCGAAGCACAGATACTGGATCTCTTAACCGCTTCTACACACTCATACTCAT  
GACTTTGGCATGAAAAAGCCTCCACTACTCAACAGCTTGGATTACATTCAAGCTAAAGTT  
GAGATGTTGGACAACCTGTTGGACATTGAAGTGGCTTACAGTCTGCTAAGAGGAGGAGCT  
CAGGACAATGAACACGATCCCATCGATATCAACTACGAGAACTCAAAACCAAGATTGAG  
GTTGTTGACAAGTCAACCCAGGAGGCTGAGGTCATTACCCAGTATGTGAAGAACCCCAT  
GCTGCTACGCACAACACATACTCTGGAAGTACAAGAAATCTTCAAATTTGGCCGAGAA  
GGAGAGCGCAACGCTTCCGTCCCTTCGAGGAGCTTCAACAGACAGTTGTTGTGGCAC  
GGCTCTCGCGCAACAACTACGCCGGCATCATGTCTCAGGGTCTCCGCATCGCTCCTCT  
GAAGCCCCAGTGACCGGTTACATGTTGGTAAAGGTGTATACTTTGCTGACATGGTGTCC  
AAGAGTGCAAACACTACTGTCATACCTCGCAGTCAGACCCCGTTGGCCTCATACTGCTGGCA  
GAGGTGGCGTTAGGAAAACATGCATGAACTGAAGAAGGCCAGTCACATCACGAAATTGCCA  
AAGGGAAAGCACAGTGTCAAAGGTCTGGGTAGAACCGCTCCTGATCCAAGTGCTACTGTC  
ACTTTGGACGGAGTGCAAGTGCTCTGGGAAAAGGAGTCAAACAAACATAGACGATACA  
AGCCTACTCTACAACGAATACATTGTGTATGATGTAGCCCAGATCAACTTGAAGTATCTT  
CTGAAGATCAAGTTTAACTACCAGACATCCTTGTGG

>Naked\_mole\_rat\_PARP1

ATGGCCGAGGCAGCGGACAAGCTCTACCGCGCCGAGTACGCCAAGAGCGGGCGCGCATCG  
TGCAAGAAATGCGGCGAGAGCATCCCCAAGGACTCGCTGCGCATGGCGCTCATGGTGCAG  
TCACCCATGTTTCGATGGCAAAGTCCCACACTGGTACCCTTCTCCTGCTTCTGGAAAATG  
GGCCACACCATCCGGCACCTGACGTGGAGGTGGACGGCTTCTCGGAGCTGCGGTGGGAT  
GACCAACAGAAAGTGAAGAAGACTGCGGAGGCCGGAGGAGTGACGGGCAAAGGCCAGGAT  
GGAGTTGGCGCAAGGCCGAGAAAACCTTGGGTGACTTCGCTGCAGAGTACGCCAGGTCC  
AACCGAAGCACGTGCAAGGGGTGCATGGAGAAGATCGAGAAGGGCCAGATGCGCCTGTCC  
AAGAAGATGCTAGACCCAGAGAAGCCGAGCTAGGCATGATCGACCGTTGGTACCACCCA  
GACTGCTTTGTCAAGAACAGGGAGGAGCTGGGCTTCCAGCCTGAGTACAATGCCAGCCAG  
CTCAAGGGCTTCAACCTCCTCTCTGCAGAGGATAAAGAAGCCCTGAAGAAGCAGCTCCCG  
GGGTCAAGAGTGAAGGAAAGAGGAAAGGCGATGAGGTGGATGGGACAGATGAAGTGGCC  
AAGAAGAAATCTAAGAAAGAAAAGGACAAGGACAGCAAGCTGGAAAAGGCCCTCAAGGCC  
CAGAATGACCTGATCTGGAACATCAAGGACGAGCTGAAGAAAGCATGTTTCGACAAATGAC

CTGAAAGAGCTGCTCATCTTCAACAAGCAGCAAGTGCCATCTGGGGAGTCGGCGATCTTG  
GACCGAGTCGCCGACGGCGTAGCATTGGGGCCCTCCTCCCTGTGAGCAGTGCTCAGGC  
CAGCTGGTCTTCAGGAGCGATGCTTATTACTGTACAGGGGACGTCACGGCCTGGACTAAG  
TGCATGGTCAAGACACAGACACCCAGTCGAAAGGAATGGGTGACTCCCAAGGAATTCCGA  
GAAATCTCTTACCTGAAGAAATTGAAGGTCAAAAAGCAAGACCGAATATTTCCCCCTGAG  
GCCATGGCACCCCGCCACCCCTGGCCTTGACGCCGGCTGCTGTGAACTGCGCTGCCCCG  
GCAGATAAGCCCCTGTCCAACATGAAGATCTTGCTGCTTGAAAGCTCTCCCGGAACAAG  
GATGAAGTGAAGGCTGCCGTGAGAAAGCTTGGGGGCAAGCTAACGGGATCAGCCAGCAAG  
GCCGGCCTGTGCATCAGCACCAAGAAGGAGGTAGAAAAGATGAATAAGAAGATGGAGGAA  
GTAAAAGAAGCCAACATCCGTGTTGTGTCTGAGGATTTCCCTCCAGCATGTGTCCACCTCA  
ACCAAGGCCCTACAGGAGCTGTTATTAGCGCACATCTTGTCCTTGGGGGGCAGAGGTG  
AAGGCAGAGCCTGTTGAAGCAGAGCCCCAAGGGCGAAGTCGGGGGCTCTGGTCCCAAG  
AAGAGCAAGGGCAGTACCAAGGAAGAAGGTATCAAGTCTGAAAAGAGAATGAAGTTAACT  
CTTAAAGGAGGAGCAGCTGTGGATCCTGACTCTGGTCTGGAACACTCAGCACATGTCCTG  
GAGAAGGGCGGAAGGTCTTCAGTGCAACCCTTGGCCTGGTGGACATTGTGAAAGGGACC  
AACTCCTACTACAAGCTGCAGCTTCTGGAGGATGACAAGGAGAGCAGGTACTGGACATTC  
AGGTCCTGGGGCCGTGTGGGCACTGAGATTGGTAGCAACAAGCTGGAGCAGATGCCATCT  
AAGGAAGATGCTATTGAGCACTTTATGAAATTATGAAGACAAAAGTGGAAATGCTTGG  
CACTCCAAAACCTTACAAAGTATCCAAAAGTTCTACCCTCTGGAGATTGACTATGGC  
CAGGATGAGGAGGCAGTGAAGAACTGACAGTAAACCCTGGCTCCAAATCCACACTCCCC  
AAGCCGGTGAGGAGCTCATTAGGATGATCTTTGATGTGGAAGTATGAAGAAAGCCATG  
GTGGAGTACGAGATCGACCTTCAGAAGATGCCCTTGGGGAAGCTGAGCACAAGGCAGATC  
CAGGCTGCATACGCCATCCTCAGCGAGGTCCAGCAGGCCCTGTCCCAAGGCAGCAGTGAC  
TCCAGATCCTGGATCTCTCAAATCGTTCTATACCCTGATCCCCATGACTTTGGGATG  
AAGAAGCCCCCGCTGCTGAACAGCGCAGACAGTGTGCAGGCCAAGGTGGAAATGCTGGAC  
AACCTCCTGGACATCGAGGTGGCCTACAGTCTGCTGAGGGGTGGGTCTGATGACAGCAGC  
AAGGACCCCATCGATGTCAACTATGAGAAGCTCAGAAGTACATAAAGGTGGTTGACAAA  
GATTCTGAAGAAGCGGAGATCATCAGGAAATATGTGAAGAACACGCACGCAACCACACAC  
AATGCATATGACTTGGAGGTCATCGACATCTCAAGATAGCGCGGAAGGCGAGAGCCAG  
CGTTACAAGCCCTCAAGCAGCTCCACAACCGGAAGTTGCTGTGGCACGGGTCCCGGACC  
ACCAACTTCGCCGGGATCCTGTCCAGGGCCTGCGGATAGCGCCGCTGAAGCTCCTGTG  
ACAGGCTACATGTTTGGAAAGGCATCTATTTGCTGACATGGTCTCCAAGAGTGCCAAC  
TACTGCCACACATCTCAGGGAGACCCAATAGGCCTAATCCTGTTGGGAGAAGTCGCCCTT  
GGAAACATGTACGAACTGAAGCATGCTTACACATCAGCAAGTTACCCAAGGGCAAGCAC  
AGCGTCAAAGGTTTGGGAAAAACGACCCCTGACCCCTCGGCTAGCATCGCTGTGCAGGGG  
GTCGAGGTGCCCTGGGCCCGGGATCTCCTCTGGTGTGAACGACACCTGCCTGCTGTAC  
AATGAGTACATCGTCTATGACATTGCTCAGGTGAATCTGAAGTATCTGCTGAAACTGAAG  
TTCAATTTAAGTCCCTCCCTGTGG

>Opossum\_PARP1

ATGGCGGAGTCGGCGGACAAGCCCTACCGGGCTGAGTACGCGAAGAGCGGACGCGCCTCT  
TGCAAGAAATGTGGCGAGAGCATAGCCAAGGACTCGCTCCGCCTGGCCATCATGGTGCAG  
TCACCCATGTTTGTGGAAGATCCCAAAGTGGCATCACTATGCTTCTGGAAGCGT  
GGGCTCGTCATCTCAGGCTGAGCTTGAAGTGGATGGGTTCTTGGAGCTGCGATGGGAC  
GACCAGCAGAAAATTAAGAAGACCATCGAAACTGGAGGGCTGACAGGAGGCAAAGGTGGG

AGTCAAGATGGTGGTGGTAAAGGGGAGAAAACCTAATCAACTTTGCAGCAGAGTATGCC  
AAGTCCAATAGGAGCGCTTGCAAAGGGTGTGAGCAGAAAATAGAAAAGGGCCAGGTACGG  
TTGTCCAAGAAAATGATTGATCCAGAGAAGCCACAACCTGGGGATGATTGACCGCTGGTAC  
CACCCAGACTGCTTCGTCAAATGCCGAGATGAGCTGGGATTCTGCCTCAATACAGTGCT  
AGCCAGTTCAAAGGTTTCAGTATTCTGCAGCCAGAGGACAAGGAGACCCTCAAGAAACAG  
CTCCCAGCAGTCAAGACTGAAGGGAAAAGAAAAGGAGATGAGGTGGATGGAGATGATTTA  
GCCAAGAAGAAAACCAAGAAAAGAAAAGAAAAGAAAACGAAGATAGAGAAACTCTTCAAG  
ACACAAAACAGAGCTCATCTGGAACATCAAAGACGAACTCAAGAAAAGTCTGTTCTACCAAT  
GATCTGAAAGAGCTGCTGATAGCCAACAAGCAGGAAGTGCCTTCTGGGGACTCAGCTATA  
TTGGACAGAGTAGCAGATGGGATGGCTTTTGGAGCTCTTCTCCCTGTGAAGAGTGCAA  
GGACAGTTTGTCTTCAAGAGTGATGCATACTACTGTTCTGGAGACATAACTGCTTGGACC  
AAGTGTGTGGCCAAAACACAGACTCCCAACAGGAAGGAATGGATCATCCCCAAGAGTTC  
CGTGAAATCTCTTACCTCAAAAAATTTAAGTGCAAAAAACAGGACCGAGCATTCCCCCA  
GAAGCTAATGCCCCACCTTCAAAGCCCCTCCCCTCATCAGTGGCAGCCCCTCCCACCGTG  
AACTCCTCTGCCAGCCAGATAAGCCATTGTCCAACATGAAGATTTTACTCTAGGGAAG  
CTTTCCAGAAAACAAGGATGAAATGAAAGCCACAATAGAGGAACTTGGGGGGAAGCTGACA  
GGGACAGCTAACAAAGCTTCCCTCTGCATCAGTACAAAAAAGGAGGTTGAGAAGATGAAT  
AAGAAGATGGAAGAGGTCAAAGAAGCCAATGTGCGTGTAGTATCAGAGGATTCCTCAAG  
GATATATCTGCTTCTGGCAAGAGCCTCCAAGAGCTGCTGTCTCTGCATATCTTATCTTCC  
TGGGGCACTGAAGTGAAGCAGGAACCTGTGGAAGTGAAGGCAGGGGGGAAGTCAGGCCCT  
TCTTCCAAGAAGAGCAAGGGCCAAGTCAAGGAGGAGGAAGGGACCAGCAAATCGGAAAAAG  
AAAATGAAATTAACACTAAAAGGTGGAGCAGCTGTGGATCCTGACTCTGGGCTAGAGGAT  
TCAGCTACGTACTTGAAAAAATGGAAAAATCTTCAAGTGCTACCCCTGGCCTTGTGAC  
ATTGTTAAAGGGACCAACTCATATTATAAGCTGCAGCTCCTAGAAGATGATAGAGAAATT  
AGGTAAGTGGATATTTAGATCTTGGGGCCGAGTGGGCACTGTGATTGGCAGCAATAAACTG  
GAACAGATGTCATCCAGGGAAGATGCTATTGATCACTTTTGTAAAGTTATATGAGGAGAAA  
ACTGGCAACTCTTGGCATTCTACCAACTTCACTAAATATCCCAAGAAATTCTATCCACTG  
GAGATCGACTATGGGCAGGATGAAGAAGCTGTGAAGAAGCTGACTGTCAGTGCTGGTACC  
AAGTCAAAACTCCCATACCAGTTCAAAACCTCATCAAGATGATTTTTGATGTGGAGAGC  
ATGAAAAAGGCCATGGTGGAAATTTGAGATTGACCTTCAGAAGATGCCATTGGGAAAGCTG  
AGCAAGAGACAGATCCAGAATGCATACTCAATCCTCAGTGAGGTACAGCAGGTGGTTTCC  
CAGGGTGGCAGTGACTCTCAGATTCTGGATCTCTCCAATCGCTTCTATACCCTGATTCCC  
CATGACTTTGGAATGAAGAAGCCTCCACTCCTGAACAATATTGATTGTGTGCAGGCCAAA  
GTAGAGATGCTTGACAATCTACTGGACATTGAGGTAGCATATAGTCTACTCCGTGGTGGG  
TCTGAAGATGGCAGCAAGGATCCCATTGATGTCAACTATGAGAAGCTTAAAACTGATATT  
AAGGTGGTTGACCAGAATTCAGAAGAAGCTGACATCATTAGGCAATATGTTAAGAACACA  
CATGCTACTACTACAATGCCTACGACTTGGAAATTATAGATATCTTTAAGATTGAACGT  
GATGGAGAAAAGCCAACGTTATAAGCCCTTTAAACAGCTTATAACCGGCGTTTGTGTGG  
CACGGGTCCAGGGCTACCAACTATGCTGGAATCCTTTCTCAGGGTCTGCGAATTGCCCA  
CCTGAAGCCCCTGTGACTGGTTACATGTTTGGTAAAGGAATCTACTTTGCTGACATGGTT  
TCCAAGAGTGCCAATTACTGCCACACATCTCAGGGAGACCCAATAGGATTAATCCTCCTG  
GGAGAAGTTGCCCTTGGAAACATGTATGAGCTGAAGCACGCCTCCACATCAGCAAGTTA  
CCCAAGGGCAAGCACAGCGTCAAAGGTTTGGGCAAACTACACCTGATCCAACGGCCAGC  
ATCACTCTTGATGGTGTAGAAATCCCTTGGGGACTGGGGTTTCATCCGGCGTTAGTGAC



ACCTGTCTGCTCTATAACGAATACATTATCTATGACATTGCTCAGGTCAATCTGAAGTAT  
CTGCTGAAACTGAAGTTCAACTTCAAGAGCTCTCTGTGG

>Orangutan\_PARP1

ATGTTTGTGAAAAAGTCCCACTGGTACCATTCTCTGCTTCTGGAAGGTGGGCCAC  
TCCATCCGGCACCTGACGTTGAGGTGGATGGGTTCTCTGAGCTTCGGTGGGATGACCAG  
CAGAAAGTCAAGAAGACAGCGGAAGCCGGAGGAGTGACAGGCAAAGGCCAGGATGGAATT  
GGTAGCAAGGCAGAGAAGACTCTGGGTGACTTTGCAGCAGAGTATGCCAAGTCCAACAGA  
AGTACGTGCAAGGGCTGTATGGAGAAGATAGAAAAGGGCCAGGTGCGCCTGTCCAAGAAG  
ATGCTGGACCCGGAGAAGCCACAGCTAGGCATGATTGACCGCTGGTACCATCCAGGCTGC  
TTTGTCAAGAACAGGGAGGAGCTGGGTTTCCGGCCCGAGTACAGTGCGAGTCAGCTCAAG  
GGCTTCAGCCTCTTGCTACAGAGGATAAAGAAGCCCTGAAGAAGCAGCTCCAGGAGTC  
AAGAGTGAAGGAAAGAGAAAAGGCGATGAGGTGGATGGAGTGGATGAAGTGGCCAAGAAG  
AAATCTAAAAAAGAAAAGACAAAGATAGTAAGCTTGAAAAAGCCCTAAAGGCTCAGAAC  
GACCTGATCTGGAACATCAAGGACGAGCTAAAGAAAGTGTGTTGACTAATGACCTGAAG  
GAGCTACTCATCTTCAACAAGCAGCAAGTGCCTTCTGGGGAGTCGGCGATCTTGACCGA  
GTAGCTGATGGCATGGTGTTCGGTGCCCTCCTCCCTGTGAGGAATGCTCGGGTCAGCTG  
GTCTTCAAGAGCGATGCTTATTACTGCACTGGGGACGTCACTGCCTGGACCAAGTGATG  
GTCAAGACACAGACACCCAACCGGAAGGAGTGGGTAACCCCAAAGGAATTCCGAGAAATC  
TCTTACCTCAAGAAATTGAAGGTTAAAAAGCAGGACCGTATATCCCCCAGAAACCAGC  
GCCCCGTGGCAGCCACGCCCCCGCCCTCCACAGCCTCGGCGCCTGCTGCTGTGAACTCC  
TCTGCTTCAGCAGATAAGCCATTATCCAACATGAAGATCCTGACTCTCGGGAAGCTGTCC  
CGGAACAAGGATGAAGTGAAGGCTATGATTGAGAACTCGGGGGGAAGTTGACGGGGACG  
GCCAACAAAGGCTTCCCTGTGCATCAGCACCAAAAAGGAAGTGGAAAAGATGAATAAGAAG  
ATGGAGGAAGTAAAGGAAGCCAACATCCGAGTTGTGTCTGAGGACTTCTCCAGGACGTC  
TCCGCCTCCACCAAGAGCCTTCAAGGAGTTGTTCTTAGCGCACATCTTGTCCCCTTGGGGG  
GCAGAGGTGAAGGCAGAGCCTGTTGAAGTTGTGGCCCCAAGAGGGAAGTCAGGGGCTGCG  
CTCTCCAAAAAAGCAAGGGCCAGGTCAAGGAGGAAGGTATCAACAAATCTGAAAAGAGA  
ATGAAATTAACTCTTAAAGGAGGAGCAGCTGTGGATCCTGATTCTGGACTGGAACACTCT  
GCGCATGTCCTGGAGAAAGGTGGGAAGGTCTTCAAGTCCACCCTTGGCCTGGTGGACATC  
GTTAAAGGAACCAACTCCTATTACAAGCTGCAGCTTCTGGAGGACGACAAGGAAAACAGG  
TATTGGATATTCAGGTCCTGGGGCCGTGTGGGTACGGTGATCGGTAGCAACAACTGGAA  
CAGATGCCGTCCAAGGAGGATGCCATTGAGCACTTCATGAAATTATATGAAGAAAAAACC  
GGGAATGCTTGGCACTCCAAAAATTTACGAAGTATCCAAAAAGTTCTACCCCCTGGAG  
ATTGACTATGGCCAGGATGAAGAGGCAGTGAAGAAGCTGACAGTAAATCCTGGCACCAAG  
TCCAAGCTCCCCAAGCCAGTTCAGGACCTCATCAAGATGATCTTTGATGTGGAAAGTATG  
AAGAAAGCCATGGTGGAGTATGAGATCGACCTTCAGAAGATGCCCTTGGGGAAGCTGAGC  
AAAAGGCAGATCCAGGCCGATACTCCATCCTCAGTGAGGTCCAGCAGGCAGTGTCTCAG  
GGCAGCAGCGACTCTCAGATCCTGGATCTCTCAAATCGCTTTTACACCCTGATCCCCAC  
GACTTTGGGATGAGGAAGCCTCCGCTTCTGAACAATGCAGACAGTGTGCAGGCCAAGGTG  
GAAATGCTTGACAACCTGCTGGACATCGAGGTGGCCTACAGTCTGCTCAGGGGAGGGTCT  
GATGATAGCAGCAAGGACCCCATCGATGCAACTATGAGAAGCTCAAACTGACATTAAG  
GTGGTTGACAGAGATTCTGAAGAAGCCGAGATCATCAGGAAGTATGTTAAGAACAATCAT  
GCAACCACACAAATGCGTATGACTTGGAAAGTCATCGATATCTTTAAGATAGAGCGTGAA  
GGCGAATGCCAGCGTTACAAGCCCTTAAAGCAGCTTCATAACCGAAGATTGCTGTGGCAC

GGGTCCAGGACCACCAACTTCGCTGGGATCCTGTCCCAGGGTCTTCGGATAGCCCCGCCT  
GAAGCGCCCGTGACGGGCTACATGTTTGGTAAAGGGATCTATTCGCTGACATGGTCTCC  
AAGAGTGCCAACTACTGCCATACATCTCAGGGAGACCCAATAGGCTTAATCCTGTTGGGA  
GAAGTTGCCCTTGAAACATGTATGAACTGAAGCACGCTTCACATATCAGCAAGTTACCC  
AAGGGCAAGCACAGTGTCAAAGGTTTGGGCAAACTACCCCTGACCCTCAGCTAGCATT  
AGTCTGGATGGTGTAGAGGTTCTCTTGGGACCGGGATTTCATCTGGTGTGAATGACACC  
TGTCTACTATATAACGAGTACATTGTCTACGATATTGCTCAGGTAATCTGAAGTATCTG  
CTGAAACTGAAATCAATTTAAGACCTCCCTGTGG

>western\_painted\_turtle\_PARP1

ATGTTTCGATGGTAAAGTCCCCACTGGCATCATTATACTGTTTCTGGAAGCGGGCCCGA  
CTCGTGTCCCATGCAGATGTTGATGGCTTCCCTGAGCTCCGATGGGAAGATCAGGAGAAA  
ATCAAAAAGCAATTGAACTGGAGGAGTCGCAGCAGGTAAAGGGACTGACCAGGAGGGA  
GGTGGCAAGGCTGAGAAGAGTTTAAATGACTTCGCTGCAGAATATGCCAAGTCTAACAGA  
AGTACCTGCAAAGGTTGTGAACAGAAAATAGAAAAGGGCCAGATCAGAATTTCAAGAAG  
ATGGTGCATCCTGAAAAGCCCCAGCTGGGAATGATAGATAATTGGTACCATCCTGACTGC  
TTTGTGAGCCACCGAGCAGAAGTGGGCTTCTCCCTGCATTTGGAGCCAGTCAGCTCCAG  
GGCTTTGGGATGTTGAAAGCAGAAGATAAAGAAGCTCTGAAAAGCAGCTGCCTGCCATG  
AAGAGTGAAGGAAAGAGAAAAGGAGATGAGGTGGATGGAAATGTGACCTCAAAAAGAAA  
CAGAAAAAGAAAAAGACAGAGAATCCAAGCAGGAGAAGCTGTTGAAGGAGCAGACAGAA  
TTGATTTGGAGCATCAAAGATGAGCTGAGGAAAGTCTGTTCCACTAACGACCTGAAAGAG  
CTGCTGATAGCCAACAAACAGGAAGTGCCTTCTGGGAATCTGCTATCTTGACCGAGTA  
GCAGATGGGATGGCCTTCGGAGCTCTGCTTCCCTGTGAGGAGTGCAAGGGGCAGTTTGTG  
TTCAAGAGTGATGCATACTACTGCTCAGGGGACATCACTGCCTGGACTAAATGTGTTGCC  
AAAACACAGACCCCAACAGGAAGGAATGGATAATCCCAAAGGAGTCCGGGAAATCTCC  
TACCTGAAGAAGTTTAAAGTGTA AAAAGCAAGACAGAGCATTCCCTCCAGAGGCTGTGGCT  
GTGAACGCAGTGCTTCCAGCAGCAGCTTCTGCTCCTTTGACAGAGAAGGCGTCTGTGCCA  
GCAGATAAGCCATTATCCAGCATGAAGATTTTGACCCTTGGAAAATTATCCAGGAACAAG  
GAAGAAGTGAAGGCTATGATTGAGGACCTGGGCGGAAAGGTGACAGGGACAGCGAACAAG  
GCTACCCTGTGCATCAGCACACAAAAGGAAGTTGAGAAAATGACCAAGAAGATGGAAGAA  
GTGAAGGAGGCCAAAGTCCGGGTGGTCTCAGAGGAGTTTCTGCAGGATGTGAAATCCTCC  
CGCAAGGGCTTCCAGGAGCTCCTGTCGCTGCATGCGCTCTCGCTTGGGGTGCAGAGGTG  
AAGCAGGAGCACACGGAGACGTCCCTGGGAGGAAAGTCCAGCGGGCTCCCAAATATGAAG  
AGTGCTGGGAAGGTCAAGGAAGAACAAGGAACCAGCAAGTCTGAAAAGAAAATGAAGTTA  
ACAGTTAAAGGAGGAGCAGCAGTGGATCCTGATTGAGTTTGGAGGACTCTGCTCATGTC  
TTTAAAAGAGTGGTAAATCTTCAGTGCCACGCTCGGCCTGGTAGATATCGTCAGAGGA  
ACCAATTCCTATTACAACTGCAGCTACTGGAGGATGACAGAGAGATCAGGTAAGGTT  
TTCAGATCTTGGGGTCGTGTTGGCACTGCGATTGGGAGTAACAACTGGAGCAGATGCCA  
TCTAAAGATGATGCCATTGAGCACTTCTTGAATTTGTATGAAGAGAAAACGGGCAACTCC  
TGGCATTCCAAGAACTTCACTAAATATCCAAAAAATTCTACCCCTGGAAATAGACTAT  
GGACAGGATGAAGAAGCTGTGAGGAACTGACAGTGAGTGCTGGGACCAAGTCAAAGCTT  
CCTAAGCCAGTCCAGGACCTTATTAAGATGATCTTTGATGTGGAGAGCATGAAGAAAGCC  
ATGGTGAATTTGAGATTGACCTCCAGAAGATGCCACTGGGAAAGCTGAGCAAGAGGCAG  
ATCCAGAGTGCATACTCCATCCTAACGAAGTTCAGCAGGCAGTTTCTGATGGTGGCAGT  
GATTCTCAGATACTGGATCTCTCAATCGCTTCTATACCCTGATACCTCATGACTTTGGG

ATGAAGAAACCACCTCTCTTAAATAACCTAGATCATATCCAGGCCAAAGTGGAGATGTTA  
GACAACCTGCTTGATATTGAGGTGCTTACAGCCTTCTCAGAGGTGGAAATGAAGATGGG  
GATAAAGACCCAATTGACATCAACTACGAAAAGCTCAAACTAACATTAAGTTATTGAT  
AAAGATTCAGAAGAAGCCAAGATCATAAAGCAGTATGTGAAGAATACACATGCCTCTACC  
CACAATGCATATGATCTAAAAGTTGTGGATATCTCAAGATTGAACGTGAAGGAGAAAAT  
CAGCGTTACAAACCGTTCAGACAGCTTCATAATCGCCAGCTGCTCTGGCATGGCTCCCGC  
GCTACCAACTTTGCTGGCATCTTCTCACAGGTCTCCGAATAGCTCCACCTGAAGCTCT  
GTGACTGGTTACATGTTTCGGTAAAGGAATCTATTTTTCGGACATGGTATCCAAGAGTGCC  
AACTACTGTCACACGTCTCAGACTGACCCAATAGGCTTAATCTTACTGGGAGAGGTTGCC  
CTTGGAACATGCATGAGCTAAAGAATGCTTCCCACATAACTAAGTTGCCAAGGGAAAA  
CACAGTGTCAAAGTTTGGGCAAACTGCACCGGATCTACAGCCACTATCACTCTAGAT  
GGTGTAGATATTCCTTTAGGGAATGGGATTCCATCTGGAGTTAGCGATACCTGTCTTCTA  
TATAATGAATATATTGTCTATGATGTTGCTCAGGTAAATTTGAAGTACCTGCTGAAACTG  
AAGTTCAACTATAAGACATCACTCTGG

>Tetraodon\_PARP1

ATGGCGGAATCTCAGAATGACAAGCTCTACAAAGCGGAATATGCCAAGAGCGGCCGCGCT  
TCGTGTAATAAATGCAAAGAAAACATAGCCAAAGACTCTCTAAGAATGGCCATCATGGTG  
CAGTCCCCCATGTTTATGAGGAAAGTCCCCACTGGCACCCTTCTCCTGCTTCTGGCAG  
CGGGCAGCGGCTCAGTCCACTTCGGACATTGATGGGTTTTCCAGCCTGCGCTGGGAGGAC  
CAGGAGAAGGTCAAGAAGGCCATCGAAAGTGGCGGCGGACGGGAGGAGGAACACACTCA  
AAGGGTGGAGCGAAGGCGGAGAAAACACTGAGCGAATTTGCGGTGGAATACGCCAAATCG  
AACCGAAGCACGTGCAAAGGTTGCGAGCAGAAAATAGAAAAGGATCAGATTCGTGTTTCA  
AAGAAAACCATCGACCCCGAGAAGCCTCAGCTGGGCCTGATTGACCGCTGGTACCACACA  
GCGTGCTTCGTGAGCCGGAGAGAAGAGCTGCTCTTCAAACCGGAGTACAGCGCCTCCCAG  
CTGAAGGGCTTCAACACACTGCGGGCAGAAGACAAGGAGGAACTTAAGAAAAGGCTCCCA  
GAAGTCAAAACAGAAGGGAAGCGCAAAGCCGACCAGGTGGACGGCGTCTCCTCTTTTGCC  
TTTTCAACTCAACTACTCTTTGTTTTTAAGCGTAACATGAAAAATATGGTGTGTTCTCT  
GTGCTTTTGCAGAACCAAAGTCAGCTTATCTGGGGAATAAAAGACAAGTTGAACAAGTTC  
TGTTCTGTTAATGACATGAAAGAGTTGCTGATTGCAAATGGCCAGGAGGTTCCCTCAGGA  
GAGTCCAACGTGTTGGACTGCCTGGCCGACGGCATGGCTTTTGGAGCACTGGAGCCCTGT  
GGCGAGTGTAGGGGCCAGCTGGTGTCAAGGGCGACGCTTATTACTGCACAGGCGACATC  
TCCGCCTGGACGAAGTGTGTGTACAAGACCACCACCCCAACGCAAAGACTGGGTCACC  
CCCAAGGAGTTCATGAAATTTCTTCTGAAGAAATTAAGTTCAAGGGACAGAACAGG  
ATTTACCCCAAAGAAGCTGCGCCCAAACTGTGAGTGCAGTCAAAGCCGAACCCTTAGCC  
AGCGCGTCCAGTGTCCCGTGGGTCTGCCGGAGGGAGCTCCTCCAGACAAACCTCTCACT  
GGCATGAAACTGGTGGCTGTGGGCAAGCTGAGCAAGAACAAGGATGATCTGAAGGCTGCC  
GTGGAGGAGCTGGGTGGAAGATCACCGGCGCAGCCAACAAGGCCTCGCTCTGCCTCAGC  
TCTAAGAAGGAGTTGGAGAAGATGACCAAAAAAATGGAGGAAGTGAAGGAGGCAGGGGTG  
CGCGTGGTCTCCGAGGACTTCTCACGGATATAAAGTCATCGGGAAAAGCCCTCAGGAG  
CTGGTGTCCCTGCATGCCATCTCTCCCTGGGGGGCAGAGGTCAAAGTGGAGACTCAGGCA  
CAGCCCATGGCCTCAAAGTCTGGAGCAATGGCTGCCAAGAGCACCGGCAGGGTGAAGGAA  
CAAGAGGGTGGGGGCAAAGCAAGAAGATGAAGCTGACTGTGAAAGGTGGAGCTGCTGTG  
GATCCGGATTAGGTCTGGAACAGCGCCATGTTCTGGAGCAGGGTGGGAAGATGTAC  
AGCGCCCACTGGGTTTGGTGGACATCGTCAGGGGGACTAACTCCTACTACAAACTGCAG

CTGCTGGAGGATGATGTTCAAAGAGGTTACTGGGTGTTCAAGTCATGGGGCAGAGTGGGC  
ACCACCATCGGAGGCAACAAGCTGGACAAGTTCACTGACAGGAACTCTGCCATGGACAAC  
TTCTGACTGTCTACAAGGAGAAGACTGGTAATGACTGGAGCTCCTCCAATTCACCAAG  
TATCCAAATAAGTTCTACCCCTGGAGATCGACTACGGACAGGACGAGGAAGCAGTGAAG  
AAGTTGACGGCCACAGCAGGCACCAAGTCCAAGCTGGCCAAACCCGTGCAAGAGCTGATT  
AAGATGATCTTCGACGTGGAGAGCATGAAGAAGGCCATGGTGGAGTTTGAGATTGACCTC  
CAGAAGATGCCACTGGGGAAGCTGAGTAAGAGGCAGATCCAGAGCGCGTACGCTCTCCTT  
ACTGAAGTCCACCAGGCGGTGTCAGACTCTCTGCCCCAGGCCAGATCTTGATCTCTCC  
AATCGTTTCTACTCTGATCCCTCACGACTTCGGTATGAAGAAGCCACCGCTGCTCAGC  
AACCTGGACTACATTCAGGCCAAGGTCCAGATGCTGGACAACCTGCTGGACATTGAGGTG  
GCGTACAGCCTGCTGAGGGGAGGGGCTCAGGACAACGAGAACGACCCCATCGACATCAAC  
TACGAAAACTCAAACCAAGATTGAGGTCATTGACAAGTCTGCCAAGGAGGCTGACATT  
ATTCTGCAGTATGTCAAGAACACCCACGCTGCCACGCACAACCTACACTCTGGAAGTG  
CAAGAGATCTTCAAATATGCAGAGAGGGGGAGCACCAGCGTTACCGTCTTTTCGAGGAG  
CTGCACAACCGCCAGCTGCTGTGGCACGGCTCTCGCACCACCAACTACGCGGGTATTATG  
TCTCAGGGTCTCCGCATCGCCCCGCCGAGGCTCCAGTGACCGGTTACATGTTTGCAAA  
GGCGTGTACTTTGCCGACATGGTGTCCAAGAGTGCAAATACTGCCACACCTCCAGTCG  
GAACCAGTGGGGCTCCTTCTGCTGGCTGAGGTGCGCCCTCGGCAACATGCATGAACTGAAA  
AAGGCCTCACACATTACAAAACCTACCCAAAGGAAAACACAGCGTTAAAGGTTTGGGCCGA  
ACTGCTCCGGATCCAAATGCTACTGTGACTCTGGACGGAGTACAAGTGCCTCTGGGAAGA  
GGAGTCAACACAAACATCGACGACACCAGCCTCCTGTACAACGAGTACATCGTGTATGAC  
GTGGCGCAGATCAACCTAAAGTATCTCCTGAAGGTCAGATTTAACTATCAGACATCCCTG  
TGG

>African\_ostrich\_PARP1

ATGTTTGATGGCAAAGTCCCTCACTGGCATCACTACAGCTGCTTCTGGAAGCGGGCTCGA  
ATTGTGTCCCATACGGACATCGATGGCTTCCCTGAGCTCCGATGGGAAGATCAGGAGAAA  
ATCAAGAAAGCCATTGAAACTGGAGGACCTGGAGGAGGAAAAGGAGGGGACCAGGAAGTA  
GGTGGCAAGGCTGAGAAAAGCCTAAACGACTTTGCTGCAGAATATGCCAAGTCTAACAGA  
AGTACTTGCAAAGGCTGCGAACAGAAAATAGAAAAGGGCCAGATCCGAATTTCCAAGAAG  
ATGGTGCATCCTGAAAAGCCGACGCTGGGAATGATAGATAACTGGTACCACCCGACTGT  
TTTGTGAGCCGCCGAGCAGAGTTGGGCTTCCCTCCGACGTACGGGGCCGCTCAGCTCTTG  
GGCTTCGGGATCTTGAAAGCTGAAGATAAAGAACTCTGAAGAAGCAGCTTCCAGCTACC  
AAGAGCGAAGGAAAGAGAAAAGGAGAAGAGGTAGATGGAAATGCAACTGCGAAAAAGAAA  
CAGAAAAAGAAAAAGAGAAAGAATCAAAGCAGGAGAACTGCTGAAGGAGCAGACGGAG  
CTGATCTGGGGCATCAAGGATGAGCTGAGGAAGGTCTGCTCCACTAACGACCTGAAAGAG  
CTGCTGATCGCCAACAAGCAGGAAGTGCCGTCTGGGGAGAATGCTATTTGGACCGAGTA  
GCAGATGGGATGGCATTGAGGCTCTGCTTCCCTGCGAAGAGTGTAAGGGGCAGTTTGT  
TTCAAGAGTGATGCATATTACTGTTCAAGGGATATTACTGCCTGGACTAAGTGTGTTGCT  
AAAACACAGACACCCAACAGGAAAGACTGGATAATCCCAAAGGAGTTCCGGGAAATCCCC  
TATCTCAAGAAATTTAAGTGTAAGGAGCAGGACAGGGTATTCCCTCCAGAGGCTGCAACT  
ATGAACTCTGTGCCCTCCTCGTCTGCTCTCTTTGACAGAAACCGTGTCCACACCC  
AGAGATAAACCACTGACCAACATGAAGATCTTGTTCTCGGAAAGCTGTCCAAAAACAAG  
GAGGAGGTGAAGAGCATTGTGGAGGACCTGGGAGGAAAGATGACGGGAAGCGCTAACAAAG  
GCCACCCTGTGCATCAGCACACCAAAAGATATAGAGAAAATGAACAAGAAGATGGAAGAA

GTGAAGGAAGCCAAAGTCCGCGTGGTCTCAGAGGAGTTTCTTCAGGATGTGAAATCTTCC  
AGCAAGGGCTTTCAGGAGCTTCTCTCTCCATGCGCTTTCGCCCTGGGGTGCAGAGGTG  
AAAATGGAGCACCAGGAGGTCTCTGTAGATGGGAGGTGCAGCAAACCCCTCAAATACAAAG  
AGTGCTGGGAAAGTCAAAGAAGAACAAGTCCCAGCAAGTCTGAAAAGAAAATGAAGCTA  
ACGGTTAAAGGCGGAGCGGCAGTAGATCCTGATTCTGGTTTGGAGGATTCTGCTCATGTC  
TTTGAAAAGGTGGAAAGATTTTCAGTGCAACCCCTGGGCTAGTAGATATTGTGAAAAGGA  
ACAAATTCCTATTATAAACTTCAACTGCTAGAGGATGACAGGGAGAGCAGATACTGGGTG  
TTCAGATCTTGGGGTTCGCGTGGGCACCTGTGATCGGGAGTAACAAGCTGGAGCAGATGCCA  
TCAAAGAGGAGCGCTGTTGAGCACTTCTGAATTTGTACGAAGAGAAAAGTGGCAATTCT  
TGGCATTCAAAGAACTTCACTAAATATCCAAAAAATTTTACCCACTGGAAAATTGATTAT  
GGACAGGACGAAGAAGCTGTGAGGAACTGACAGTGGGTGCTGGGACTAAATCCAAACTT  
GCTAAGCCGATCCAGGAGCTTATTAAGATGATCTTTGATGTGGAGAGCATGAAGAAAGCG  
ATGGTGAATTTGAGATTGACCTCCAAAAGATGCCGCTGGGGAAAAGTGGAGCAAGCGACAG  
ATTCAGAGCGCGTACTCCATCCTTAATGAGGTTTACAGGCGAGTTTCTGACAGTGGTTCT  
GAATCCAGATCTTGGACCTCTCAACCGCTTCTATACACTGATTCCTCATGACTTTGGG  
ATGAAGAAACCACCTCTCCTAAATAATTTAGAATACATTCAGGCTAAAAGTGCAGATGCTG  
GACAACCTGCTTGATATTGAGGTTGCCTACAGCCTTCTCAGAGGTGGAAATGAAGATGGA  
GATAAAGACCAATTGACATCAACTACGAAAAGCTCCGAAGTATTAAGTTGTTGAC  
AAAGATTCAGAAGAAGCCAAGATTATAAAACAATATGTGAAAATACTCATGCTGCTACT  
CACAATGCATATGACCTCAAAGTTGTGGATATCTTCAGGATTGAGCGTGAAGGAGAGAGT  
CAGCGGTACAAGCCATTTAAGCAGCTTCATAATCGCCAAGTCTGTGGCACGGTTCCCGA  
ACTACCAACTTTGCTGGTATCCTCTCGCAGGGTCTCCGGATAGCTCCCCCTGAAGCTCCT  
GTGACCGGTACATGTTTGGAAAGGGCATATTTTGCAGACATGGTATCCAAGAGTGCC  
AATTACTGTACACATCTCAAGCTGATCCATAGGCCTAATACTACTGGGAGAAGTTGCC  
CTTGGAAATATGTACGAGCTAAAGAATGCTTCTCACATAACGAAGTTGCCGAAGGGAAAA  
CACAGTGTGAAAGGCTTGGGCAAAAGTGCACCTGATCCTACAGCCACTACCACCTTGAT  
GGTGTAGACGTTCCCTTAGGGAACGGGATTTCCACTGGAATTAATGATACCTGTCTTCTG  
TATAACGAATATATCGTGTATGATGTTGCTCAGGTAAATCTGAAGTACCTGCTGAAAAGT  
AAATTCAACTATAAGACATCACTCTGG

>Adelie\_penguin\_PARP1

ATGTTTGTATGGCAAAGTCCCTCACTGGCACCCTACAGCTGCTTCTGGAAGAGGGCTCGA  
ATCGTGTCCACACGGACATCGATGGCTTCCCTGAACTCCGGTGGGAAGATCAGGAAAAA  
ATCAAGAAAGCCATTGAAACTGGAGGCCCTGGAGGAGGAAAAGGAGGGGAACAGGAAGGA  
GGTGGCAAGGCTGAGAAGAGCCTAAATGACTTTGCTGCAGAATACGCCAAGTCTAACAGA  
AGTACTTGCAAAGGCTGTGAACAGAAAATAGAAAAGGGCCAGATCCGGATTTCCAAGAAG  
ATGGTGCATCCTGAAAAGCCACAGCTGGGAATGATAGATAACTGGTACCACCCGGACTGC  
TTTGTGAGCCGCCGAGCAGAGCTGGGCTTCTCCAGCGTATGGGGCTGCCAGCTCCTG  
GGCTTCAGCATCTTGAAGCTGAAGATAAAGAAAATTTGAAGAAGCAGCTCCAGCTACC  
AAAAGTGACGGAAAGAGAAAAGGAGAAGAGGTAGATGGAAATGTGACTGCAAAAAGAAA  
CAGAAAAAGAAAAAGAGAAAGAATCAAAGCAGGAAAAACAGCTGAAGGAGCAGACAGAG  
CTGATCTGGGCATCAAGGATGAGCTGAGGAAGGTCTGCTCCACTAACGACCTGAAAGAG  
CTGCTGATCGCCAACAAGCAGGAAGTGCCTCAGGGGAGAATGCCATTTTGGACCGAGTA  
GCAGATGGGATGGCATTGAGGCTCTGCTTCCCTGCGAGGAGTGAAGGGGCAGTTTGTG  
TTCAAGAGTGATGCATATTACTGTTCAAGGGATATTACTGCCTGGACTAAGTGTGTTGCT

AAAACGCAGACTCCCAACAGGAAAGACTGGGTAATCCCAAAGGAGTTTCGGGAAATCCT  
TACCTGAAGAAATTTAAATGTAAGAAGCAAGACAGGGTATTCCCTCCAGATGCTGCGACT  
GTGAACTCTGTGCCTCCTCCCTCCGCATCTGCTCCTTTGACAGAGACCGTGTCTGCACCC  
AGAGACAAACCACTGACCAACATGAAGATCCTGGTTCTTGAAAGCTGTCAAAGAACAAG  
GAGGAGGTGAAGAGCATTGTGGAGGAGCTGGGAGGAAAGATGACAACAACAGCTAACAAAG  
GCCACCCTGTGCATCAGCACACAGAAGGATGTGGAGAAGATGAGCAAGAAGATGGAAGAA  
GTGAAGGAGGCCAAAGTCCGTGTGGTCTCAGAGGAGTTTCTCAGGATGTGAAATCCTCC  
AGCAAGGACTTTTCAGGAGCTTGTGTCTCTCCATGCACCTTCGCCTTGGGGTGCGGAGGTG  
AAAATGGAGCACGAGGAAATGGCCGTGGATGGGAAATGCAGCAAGCCCCAAGTATGAAG  
AGTGCTGGGAAGGTCAAAGAAGAACAAGGACCTAGCAAGTCTGAAAAGAAAATGAAGCTA  
ACAGTTAAAGGTGGAGCAGCAGTAGATCCTGATTCTGGTTTGAGGATTCTGCTCACGTC  
TTTGAAAAAGGTGGAAAGATTTTCAGTGCAACCCTGGGCCTAGTAGATATTGTGAAAGGA  
ACAAATTCCTATTACAACTGCAGCTGCTAGAGGATGACAGAGAGAACAGATACTGGGTG  
TTCAGATCTTGGGGTCGCGTGGGCACTGTAATTGGGAGTAACAAGCTGGAGCAGATGCC  
TCAAAGAAGATGCTGTTGAACACTTCTGAATTTGTATGAAGAGAAAAGTGGCAATTCT  
TGGCATTCAAAGAAGTCACTAAATATCCCAAAAATCTACCCGCTGGAAATAGATTAT  
GGGCAGGATGAAGAAGCTGTGAGGAACTGACAGTGGGTGCCGGGACTAAGTCAAAGTCC  
GCTAAGCCAATCCAAGACCTGATTAAGATGATCTTTGATGTGGAGAGCATGAAGAAAGCG  
ATGGTGAATTTGAGATTGACCTGCAGAAGATGCCATTGGGAAAAGTGGCAAGCGACAG  
ATCCAGAGCGCATACTNNNNNNNNNNNNNNNNNNNNNAGGCAGTTTCTGACAGTGGTTCA  
GAATCCCAGATCTTGGACCTCTCCAACCGCTTCTATACTCTGATTCTCATGACTTTGGG  
ATGAAGAAACCACCTCTCCTAAATAACTTGAATACATTCAGGCTAAAGTGCAAATGTTG  
GACAACTTGCTTGATATTGAGGTTGCTTACAGCCTTCTCAGAGGTGGAAATGAAGATGGA  
GATAAAGACCAATTGACATCAACTATGAAAACTTCGAACTGATATTAAGTTGTTGAC  
AAAGATTCAGAAGAAGCCAAGATTATTAACAATATGTGAAAAATACTCATGCCGCTACT  
CACAACGCATATGATCTCAAAGTCGTGGATATCTCAGAATTGAGCGTGAAGGAGAGAGT  
CAGCGTTACAAGCCATTTAAGCAGCTTATAATCGCCAGCTGCTGTGGCACGGTCCCGC  
ACCACCAACTTTGCTGGTATCCTCTCGCAGGGTCTCCGGATAGCTCCCCCTGAAGCTCCT  
GTGACCGCTACATGTTTGGGAAGGGCATCTATTTTGCAGACATGGTATCCAAGAGTGCC  
AACTACTGTCACACATCTCAAGCTGATCCCATAGGCTTAATACTACTGGGAGAAGTTGCC  
CTTGGAAATATGATGAGCTAAAGAATGCTTCTCACATAACAAAATTGCCTAAGGGAAAA  
CACAGTGTGAAAGGCTTGGGCAAACTGCACCTGATCCACAGCCACTACCACCCTTGGT  
GGTGTAGAGATTCCCTTAGGGAATGGGATCTCAACAGGAATTAATGATACCTGTCTCCTG  
TATAATGAATATATTGTGTATGATTTGCTCAGGTAAATCTGAAGTACCTGCTGAAACTG  
AAATTCAACTATAAGACATCACTCTGG

>Gecko\_PARP1

ATGGCGGAGCCTGCTGAGAAGCTGTACCGGGCCGAGTATGCTAAGAGCGGCCGGGCTTCC  
TGCAAGAAATGTGGAGACAACATCGCCAAGGATTCGCTGCGCCTGGCCATCATGGTGCAG  
TCCCCATGTTTGTGTCGAAAGTACCCCACTGGCACCATTACTCCTGCTTCTGGAAGCGG  
GCACGACTTGTGTCTCACACTGATGTAGATGGCTTCTCTGAACTGCGATGGGACGATCAA  
GAGAAAATTAATAAACCATAGAGACTGGTGGCGCTGCAACAGGTAAAGGTGGTGACCAA  
GAGGGAGGCAGCAAAGCTGAAAAAAGTTAAATGATTTTGCAGCAGAATATGCAAAGTCC  
AACAGAAGTACCTGCAAAGGCTGTGAACAGAAAATAGAAAAGGGCCAGATTAGAATTTCA  
AAGAAAATGGTGCACCCTGAAAAGCCCCAACTGGGAATGATAGACAATTGGTACCACCCA

GCCTGTTTTGTCAGTCGCAGAGCAGATCTGGGTTTTCTCCCTACTTTTAGCGCTTCCCAG  
CTACTAGGCTTTGGGTCGCTGAGTGCTGAAGATAAAGAGACTCTGAAGAAGCAGCTGCCA  
GCTGTCAAGAATGATGGAAGAGAAAAGGAGATGAGGTGGATAGCAATGAGATCTCAAAA  
AAGAAGCCAAAAAAGGAAAAAGAAAAACAGTCCAAGCAGGAGAAGCTGCTGAAGGAACAG  
ACAGAGTTGATTTGGAACATCAAAGATGAATTGAAGAAAGCCTGCTCCATTAATGACCTG  
AAAGAGCTCCTGATAGCAAACAACAAGAAGTTCCTTCTGGGGAATCAGCCATCCTGGAC  
CGTGTTCGGATGGGATGGCCTTTGGGGCTCTGCTGCCATGTGAGGAATGCAAAGGGCAG  
CTTGTGTTCCGGAGTGATGCATACTACTGTACAGGGGATATTACAGCTTGGACTAAATGT  
GTTGCCAAGACGCAGACTCCCGACAGGAAAGAATGGATAATCCCAAAGGAGTTCGGGGAA  
ATCACATATCTAAAGAAATTTAAATTTAAAGGCAGGACAGAGTATTTGCCCCAGAGGCT  
GCCTCTGCAAACCTCAGTACCTCCTCCAAAAGTTTCTGTTCCAGTTACAGAAAACCTGCT  
GCTCCAGCAGATAAACCTTTATGTAACATGAAGGTCGTGACCCTTGGGAAATTGTCGAAG  
AATAAAGATGAAATCAAGTCTACTATTGAAGAGCTCGGAGGAAAGGTGACAGCTTCTGTG  
AATAAAGCTAACCTGTGCGTCAGCTCACAAAAGGAAGTTGAGAAAATGAGCAAGAAAATG  
GAAGAAGTGAAGGAGGCACAAGTGCCTGTGGTGTGAGGAGTTTCTCCAGGACATAAAG  
TCCTCCAGCAAGAGCCTTGAGGAGCTCCTGTCACTTCATGCTCTTTCCCCTGGGGCACA  
GAAGTAAAAACAAGATCACAAAGAAGTGTCCATAGGAGGAAAATCCAGTGGGCATTCAAAC  
ACAAAAAGCACTGGGAAAAGCAAGGAAGAGCAAGGAACCAGCAAGTCAGAAAAGAAAATG  
AAGCTGACAGTGAAGGAGGTGCTGCTGTGGACCCTGACTCAGGCTTAGAAGATTCTGCT  
CACGTCTTTGAAAAGGTGGCAAGATCTTCAGCGCCACTCTAGGCCTGGTAGATATTGTT  
AAAGGAACCAACTCCTATTACAACTTCAGCTGTTGGAAGATGACAGGGAAATCAGATAC  
TGGGTGTTCCGTTCTGGGGCCGTGTTGGCACAGTAATTGGAAGCAACAAGCTAGAGCAG  
ATGCCATCTAAAGAGGAAGCCATTGAACACTTTCTGAATCTGTATGAAGACAAGACTGGC  
AACTCCTGGCATTCTACAAATTTACCAAATATCCAAAAAATTCTACCCTCTGGAAATA  
GACTATGGACAGGATGAAGAAGCGGTAAAGAAAAGTACAGTTAGTGCAGGAACCAAATCA  
AAGCTTCAAAGCCAGTCCAGGATCTCATTAAAGATGATCTTTGATGTGGAAAGCATGAAG  
AAAGCCATGGTGAATTTGAGATTGATCTCCAGAAGATGCCTTTGGGGAAACTAAGCAAG  
AGGCAGATCCAGAGTGCATACTCCATCCTTAACGATGTGCAGCAGGCAGTTTCTAATGGT  
GGAACAGATTACAGATACTGGATCTCTCCAATCGCTTTTACACACTGATTCTCATGAC  
TTTGGGATGAAGAAGCCTCCTCTTTAAACAACCTAGAATACATTACGTCCAAAGTGGAG  
ATGCTGGACAACCTGCTTGACATTGAAGTTGCCTACAGCCTACTCAGAAGTGGAGGTCAG  
GATGGGGATAAAGATCCAATAGATGTGAACTATGAAAACTTAAAACCGATATCAAGGTA  
GTAGACAAAAATTCAGAAGAAGCCAAGATCATAAAGCAATATGTTAAGAATACTCATGCC  
AGTACTACAATGCTTATGACTTGAAGTTGTGGAGATTTTCAAGATTGAACGTGAAGGA  
GAATATCAGCGTTATAACCATTCAAAGAGCTACACAACCGGCAGCTACTCTGGCATGGT  
TCTCGCACTACCAATTTGCTGGTATCTTGTACAGGGTCTCCGAATAGCTCCACCTGAG  
GCCCTGTGACTGGCTACATGTTTGGTAAAGGCATCTATTTGCGGATATGGTGTCCAAG  
AGTGCCAATATTGTACACCTCTCAAATGACCCAGTAGGCTTAATCTTGCTGGGAGAA  
GTTGCCCTTGGAATATGTATGAAATGAAGAATGCTTCCCATATCACCAAGGTGCCGAAA  
GGAAAACACAGTGTGAAAGGCTTGGGCAAACTGCACCAGATCCCTCAGCCACTATCTCT  
CTCGATGGCATAGACGTTCTTTAGGCAAAGGAATACCATCAGGAATTAGTGACACCTGT  
CTTCTATATAATGAATATATTGTCTATGATATTGCTCAGGTAAACTTGAAGTACCTGCTG  
AAGTTGAAATCAACTATAAGACATCTCTCTGG

>green\_sea\_turtle\_PARP1

ATGTATGGCATCAAGAAGGCGGAGGTGTTAATACCTATTTACTTCAGTCTTCACTGAA  
AAGTCACCCATGTTTGATGGTAAAGTCCCCATTGGCATCATTATACTTGTCTGGAAG  
CGGGCCCCGACTCGTGTCCCATGCAGATGTTGATGGCTCCCTGAGCTCCGATGGGAAGAT  
CAGGAGAAAATCAAAAAGCAATTGAACTGGGGGAGCCGAGCAGGTAAAGGCATTGAC  
CAGGAGGGAGGTGGCAAGGCTGAGAAGAGTTTAAATGACTTCGCTGCAGAATATGCCAAG  
TCTAACAGAAGTACCTGCAAAGTTGTGACAGAAAATAGAAAAGGGGCAGATCAGAATT  
TCCAAGAAGATGGTGCATCCCGAAAAGCCCCAACTGGGAATGATAGATAATTGGTACCAT  
CCAAACTGCTTTGTGAGCCACCGAGCAGAACTGGGCTTTCTCCCTGCATTTGGAGCCAGT  
CAGCTCCAGGGCTTTGGGATGTTGAAAGCAGAGGATAAAGAAGATTTGAAAAAGCAGCTG  
CCTGCCATGAAGAGTGAAGGAAAGAGAAAAGGAGATGAAGTGGACGGAAATGTGACCTCA  
AAAAAGAAAACAGAAAAAAGAAAAAGACAGAGAATCCAAGCAGGAGAAGCTGTTAAAGGAG  
CAGACAGAGTTGATTTGGAGCATCAAAGACGAGCTGAGAAAAGTCTGTTCCACTAATGAC  
CTGAAAGAGCTGCTGATAGCCAACAAACAGGAAGTGCCTTCTGGGGAATCTGCTCTCTTG  
GACCGAGTAGCAGATGGGATGGCATTCCGGAGCTCTGCTCCCTGTGAGGAGTGCAAGGGG  
CAGTTTGTGTTCAAGAGTGTGCATACTACTGCTCAGGGGATATCACTGCCTGGACGAAA  
TGTGTTGCCAAAACACAGACTCCCAACAGGAAGGAATGGATAATCCCAAAGGAGTTCGG  
GAAATCTCCTACCTGAAGAAATTTAAGTGTAAAAAGCAAGACAGAGCATTCCCTCCAGAG  
TCTGTGGCTGTGAATGCAGTGCTTCCAGCAACAGCTTCTGCTCCTTTGACAGAGAAGGCG  
TCTGTGCCAGCAGATAAGCCATTATCCAGCATGAAGATTTTGACCCTTGAAAATTATCC  
AGGAACAAGGAAGAAGTGAAGGCTATAATTGAGGACCTGGGCGAAAGGTGACAGGGACA  
GCAACAAGGCTACCCTGTGCATCAGCACACAAAAGGAAATTGAGAAAATGACCAAGAAG  
ATGGAAGAAGTGAAGGAGGCCAAAGTCCGAGTGGTCTCAGAACAGTTTCTGCAGGATGTG  
AAATCCTCCAGCAAGGGCTTCCAGGAGCTCCTGTGCTGCATGCGCTCTCGCCTTGGGGT  
GCAGAGGTGAAGCAGGAGCACACGGAGACGTCCCTGGGAGGAAAGTCCAGTGGGCTCCCA  
AACATGAAGAGTGTGTTGGAAGGTCAAGGAAGAGCAAGGAACCAGCAAGTCTGAAAAGAAA  
ATGAAGTTAACAGTTAAAGGAGGAGCAGCAGTGGATCCTGATTCAGGTTTGGAGGACTCT  
GCTCATGTCTTTGAAAAGAGTGGTAAATATTCAGTGCCACGCTCGGCTTGGTAGATATT  
GTCAGAGGAACCAATTCTATTATAAACTGCAGCTACTGGAGGATGACAGAGAGATCAGG  
TACTGGGTTTTAGATCTTGGGGTCGTGTTGGCACTGTGATTGGGAGTAACAACTGGAG  
CAGATGCCGTCTAAAGATGATGCCATTGAGCACTTCTGAATTTGTATGAAGAGAAAACG  
GGCAACTCGTGGCATTCCAAGAATCTACTAAATATCAAAAAAATTCTACCCTCTGGAA  
ATAGACTATGGACAGGATGAAGAAGCTGTGAGGAACTGACCGTTAGTGTGGGACCAAG  
TCAAAGCTTCTTAAGCCAGTCCAGGACCTTATTAAGATGATCTTTGATGTGGAGAGCATG  
AAGAAAGCCATGGTGAATTTGAGATTGACCTCCAGAAGATGCCACTGGGAAAGCTGAGC  
AAGAGGCAAATCCAGAGTGCATACTCCATCCTTCATGACAAGAGACAGGCAGTGTCTGAT  
GGTGGCAGTGATTCTCAGATACTGGATCTCTCCAATCGCTTCTATACCCTGATACCTCAT  
GACTTTGGGATGAAGAAACCACCTCTCTAAATAACCTAGAACATATCCAGGCCAAAGTG  
CAGATGTTAGACAACCTGCTTATGATTGAGTGTGCTTACAGCCTTCTCAGAGGTGGAAT  
GAAGATGGGGATAAAGACCCAATTGACATCAACTACGAAAAGCTCAAACTAACATTAAG  
GTTATTGATAAAGATTGAGAAGAAGCCAAGATCATAAAGCAGTATGTGAAGAATACACAT  
GCCTTACCATAATGCATATGATCTGAAAGTTGTGGATATCTTCAAGATTGAACGTGAA  
GGAGAAAATCAGCGTTACAAACCGTTCAGGCAGCTTATAATCGCCAGCTGCTCTGGCAT  
GGCTCCCGCGCTACCAACTTTGCTGGCATCTTCTCGCAGGGTCTCCGAATAGCTCCACCT  
GAAGCTCCTGTGACTGGTTACATGTTCCGTAAGGTATCTATTTGCGGACATGGTGTCC



AAGAGTGCCAACTACTGTCACACATCTCAGACTGATCCAATAGGCTTAATTTTACTGGGA  
GAGGTTGCCCTTGAAACATGCATGAGCTAAAGAATGCTTCCCACATAACTAAGTTGCC  
AAGGGAAAACACAGTGTCAAAGGTTTGGGCAAACTGCACCTGATCCTTCAGCCACCAT  
ACTCTAGATGGTGTAGATATTCCTTTAGGGAATGGGATTCCATCTGGAATTAGTGATACC  
TGTCTTCTATATAATGAATATATTGTCTATGATGTTGCTCAGGTAAATCTGAAGTACCTG  
CTGAAACTGAAGTTCAACTATAAAACATCACTCTGG

>Chinese alligator\_PARP1

ATGGACACTCTCAAAAACATTGGAAAACAGCAGCCTCAAGAGCAGCTGTGAGGGGAACACC  
AGAGCAGTTTCACTATCGTACTTCTGGTTTGGGACGGAGTGTGAGCGGGGGCGAGGCGGG  
TGGGCGGAGCCGCGGACAAGCTGTACCGGGCCGAGTACGCCAAGAGTGGGCGGGCCTCG  
TGCAAGAAATGCGGGGAGAGCATCGCCAAGGACTCGTGCCTGGCCATCATGGTGACAG  
TCACCCATGTTTCGATGGCAAAGTCCCTCACTGGCATCATTACACTGTTTTTGAAGCGG  
GCTCGGATCACGTCTCATGCAGATATTGATGGCTTCCCTGAGCTGCGATGGGAAGATCAG  
GAGAAAATTAATAAACCATTGAAGCAGGGGGACCTGCCACAGGTAAAGGTGGTGACCAG  
GAAGGAGGTGGCAAGGCTGAGAAAAGCTTACATGACTTTGCAGTAGAATATGCCAAGTCT  
AACAGAAGTACCTGCAAAGGCTGTGAACTGAAAATAGAAAAGAGTCAGATCAGAATTTCT  
AAGAAGATGGTGCATCCGAAAAGCCCCAGCTGGGAATGATAGATAACTGGTACCATCCA  
GACTGCTTTGTGAGCCGCCGAGCAGAGCTGGGCTTTCTCCCTGCATTTGGTGCCAGTCAG  
CTCCAGGGCTTTGGCATTGTTGGTAGCTGAGGATAAAGAATCCCTGAAGAAGCAGCTGCCT  
GCCGTCAAGAGTGAAGGAAAAAGAAAAGCCGATGAGATGGATGGGACTGTGACTACAAAA  
AAGAAAACAAAAAAGAAAAGGATAAAGAATCCAAACAGGAGAAGCTGCTGAAGGAACAG  
ACAGAATTGATTTGAAGATCAAAGACGAGCTGAGGAAAGCCTGCTCCACCAACGACCTG  
AAAGAGCTGCTGATAGCCAACAACAGGAAGTGCCTTCTGGGGAATCTGCTATCTTGGAC  
AGAGTGCCAGACGGGATGGCATTGAGACTCTGCTTCCCTGTGAAGAGTGCAAGGGGCAG  
TTTATGTTCAAGAGTGACCGTACTACTGCTCAGGAGACATTACTGCCTGGACTAAATGT  
GTTGCCAAAACACAGTCTCCAAAAGGAAAGAATGGGTTATCCCAAAGGAATCCGGGAA  
ATCCCTTACCTAAAGAAATCAAGTGTAAAAAGCAGGACAGAGTATCCCTCGAGAGGCT  
GCTGCTGTGAACACTGTGCTTCCAAGTGCAGCTTCTGCTCCTTTGACAGAGGAGGCATCT  
GCACCCACAGATAAGCCATTATCCAACATGAAGATTTTGATACTTGAAAAATTATCCAGG  
AACAAAGAAGAAATGAAGACCACAGTTGAGGAGCTTGGAGGAAAAGTGACAGGAACCGCC  
AATAAGGCCAACCTGTGCATCAGCACACAAAAGGAGTTGAGAAAATGAACAAGAAGATG  
GAAGAAGTGAAGGAGGCAAAAGTCCGAGTGGTTTCAGAAGAGTTTCTCAAGGATGTGAAA  
TCCTCCAGCAAAGGCTTTCGGGAACTGCTGTGAGTACATGAGCTCTCATCCTGGGGTGCA  
GAGGTGAAGCAGGAGAACATGGAGACAACCTGTGGGAGGAAAAGTCCAGTGGGCCCCAAAT  
ATGAAGAGTGTGAAAAAGTCAAGGAAGAACAAGGGACCTGCAAGTCTGAAAAGAAAATG  
AAATTGACAGTTAAAGGAGGAGCAGCCGTAGATCCTGATTCTGGTTTGGAGGACTCCGCT  
CACGTCTTTGAAAAGGTGGTAAAATCTACAGTGCCACTTTGGCCTGGTAGATATTGTC  
AAAGGAACCAATTCCTATTACAACTGCAGCTGCTGGAGGATGACCGAGAAATCAGGTAC  
TGGGTGTTTAGGTCATGGGGTCGCTTGGCACTGTGATTGGGAGTAACAACTGGAGCAG  
ATGCCATCTAAAGAAGATGCCATTGAGCACTTTTTGAATCTGTATGAAGAGAAAACGGGC  
AATTCCTGGCATTCCAAGAACTTCAAAAATATCCAAAGAAATTCTACCCTCTAGAAATA  
GATTATGGACAGGATGAAGAAGCTGTGAAGAACTGACAGTAGGTGCCGGCACAAAGTCA  
AAGCTTCTAAATCAGTCCAGGACCTTATTAAGATGATCTTTGATGTGGAGAGCATGAAG  
AAAGCCATGGTGAATTTGAGATTGACCTCCAGAAGATGCCATTGGGAAAGCTGAGCAAG

AGACAGATCCAGAGTGCCTATTCCATCCTTAATGATGTTTCAGCAGGCAGTTTCTGGTGGC  
GGCACTGATTCTCAGATACTGGACCTCTCCAATCGCTTCTACACATTGATACCTCATGAC  
TTTGGGATGAAAAAGCCACCTCTTTAAATAACCTAGAATATATTCAGGCCAAAAGTGCAG  
ATGTTGGACAACCTGCTTGATATTGAGGTTGCTTACAGCCTTCTCAGAGGTGGAAATGAG  
GATGGGGATAAAGACCCAATTGATGTCAACTATGAAAAGCTCAAACTGAAATTAAGGTG  
GTTGATAAAGATTTCAGAAGAAGCCAAGATCATAAAGCAATATGTGAAGAATACCCATGCT  
GCTACCCACAATGCATATGATCTGAAAAGTTGTGGATATCTTCAAAATTGAGCGTGAAGGG  
GAGAGTCAGCGTTACAAGCCATTCAGACAGCTTCACAATCGCCAGCTGCTCTGGCATGGC  
TCACGTAACCAACTTTGCTGGTATTCTCTCACAGGGTCTCCGAATAGCTCCGCTGAA  
GCTCCTGTGACTGGTTACATGTTCCGAAAAGGTGTCTATTTGCAGACATGGTTTCCAAG  
AGGCCAACTACTGTCACACATCTCAGGCTGATCCAGTAGGCTTAATCTTATTGGGAGAG  
GTTGCCCTTGAAAACATGTATGAGCTAAAGAATGCTTCTCACATAACTAAGCTGCCGAAG  
GGGAAACATAGCGTCAAAGGTTTGGGCAAACTGCACCTGATCCACAGCCACCATCAGT  
TATGAGGGTGTAGAAGTTCCTTTGGGGAATGGAATGTCAACAGGAATTAATGATACTTGT  
CTTCTGTATAATGAATATATTGTCTACGATGTTGCTCAGGTAAACCTGAAGTACCTGCTG  
AAACTGAAATTCAACTACAAGACATCACTCTGG

>Mouse\_PARP1

ATGGCGGAGGCCTCGGAGAGGCTTTATCGAGTGGAGTACGCGAAGAGCGGGCGCGCTCT  
TGCAAGAAATGCAGCGAGAGTATCCCAAGGACTCCCTCCGCATGGCCATCATGGTGCAG  
TCACCCATGTTTCGATGGGAAAGTCCCACACTGGTACCCTTCTCCTGCTTCTGGAAGGTG  
GGCCACTCCATCCGGCAGCCTGATGTTGAGGTGGATGGCTTCTCTGAGCTGCGCTGGGAT  
GATCAGCAGAAGGTCAAGAAGACGGCCGAGGCTGGAGGCGTGGCAGGCAAAGGCCAGGAT  
GGAAGTGGCGGCAAGGCGGAGAAGACATTGGGTGACTTTTTAGCGGAGTACGCCAAGTCC  
AACAGGAGCATGTGCAAGGGCTGCCTGGAGAAGATAGAGAAGGGCCAGATGCGCCTGTCC  
AAGAAGATGGTGGATCCAGAGAAGCCACAGCTGGGTATGATTGACCGCTGGTACCATCCA  
ACTTGCTTTGTCAAGAAGCGGGACGAGCTGGGCTTCCGGCCTGAGTACAGTGCCAGTCAG  
CTCAAGGGCTTTAGCCTCCTCTCTGCAGAAGACAAAGAAGCTCTGAAGAAGCAGCTCCCG  
GCCATCAAGAATGAAGGAAAGAGAAAAGGTGACGAGGTGGATGGAACAGATGAAGTGGCC  
AAAAAGAAATCTAAGAAAGGGAAGGACAAGGATAGTAGTAAGCTGGAGAAGGCCCTCAAG  
GCTCAGAATGAGCTGATCTGGAATATCAAAGACGAGCTGAAGAAAGCGTGTTCACCAAC  
GACCTGAAGGAGCTGCTCATCTTCAACCAGCAGCAGGTGCCGTCAGGAGAGTCAGCGATC  
TTGGACAGAGTTGCTGACGGCATGGCGTTTGGGGCCCTTCTGCCCTGCAAGGAGTGTTC  
GGCCAGCTGGTCTTTAAGAGCGACGCTTATTACTGTACTGGGGATGTCACTGCCTGGACC  
AAGTGCATGGTCAAGACACAGAATCCTAGCCGAAAGGAATGGGTAACTCAAAGGAATTC  
CGAGAAATATCCTACCTCAAGAAGTTAAAGGTCAAAAAACAGGACCGAATATTCCCTCCA  
GAAAGCAGCGCCCCAGCACCCTGGCACTGCCCTCTCTGTACCTCAGCACCCACAGCT  
GTGAACTCCTCTGCTCCAGCAGACAAGCCCTGTCTAACATGAAGATCCTGACTCTTGGG  
AAGCTCTCCAGAACAAGGACGAAGCAAAAGCTGTGATTGAGAACTCGGAGGCAAGTTG  
ACAGGATCTGCCAACAAGGCCTCCTTGTGTATCAGCACTAAAAAGGAGGTGGAGAAGATG  
AGTAAGAAGATGGAGGAAGTGAAAGCGGCCAACGTTTCGAGTTGTGTGTGAGGACTTCCT  
CAGGACGTGTCTGCCTCCAATAAAGCCTCCAAGAGCTGCTCTCGGCCACAGCTTGTC  
TCGTGGGGGGCTGAGGTGAAGGCAGAGCCTGGTGAAGTGGTGGCCCCAAGGGGAAGTCA  
GCTGCACCCTCAAAGAAGAGCAAGGGTGTGTCAAGGAGGAAGGTGTCAACAAATCTGAA  
AAGAGGATGAAATTAATCTGAAGGGAGGAGCAGCCGTTGATCCTGACTCTGGTCTGGAA

CACTCTGCACACGTCCTGGAGAAAGGTGGGAAGGTGTTTCAGCGCCACACTTGGCCTGGTG  
GACATTGTGAAAGGGACGAACTCCTATTACAAACTGCAGCTTCTGGAGGACGACAAGGAG  
AGCAGGTACTGGATCTCCGGTCTGGGGCCGGGTGGGCACAGTTATCGGCAGTAACAAA  
CTTGAGCAGATGCCCTCAAAGAGGACGCTGTTGAGCACTTCATGAAGCTGTATGAAGAG  
AAGACTGGGAATGCCTGGCACTCGAAAACTTCACAAAGTATCCCAAGAAGTTCTACCCT  
CTGGAGATTGACTATGGCCAGGACGAAGAGGCAGTAAAGAAGCTGACGGTGAAGCCTGGC  
ACCAAGTCGAAGCTGCCGAAGCCAGTGCAGGAGCTCGTGGGGATGATCTTCGACGTGGAG  
AGCATGAAAAAGGCCCTTGGTGGAGTACGAGATTGACCTCCAGAAGATGCCCTTGGGGAAG  
CTGAGCAGAAGGCAGATCCAGGCCGCTACTCTATCCTCAGCGAGGTCCAGCAGGCAGTG  
TCTCAAGGCAGCAGTGAATCCCAGATCCTAGATCTCTCCAATCGTTCTACACTCTGATC  
CCCCATGACTTTGGAATGAAGAAGCCCCACTCCTGAACAACGCAGACAGCGTGCAGGCC  
AAGGTGGAGATGCTAGACAACCTCCTGGACATCGAGGTGGCCTATAGTCTTCTCAGGGGT  
GGCTCTGACGACAGCAGCAAGGATCCCATCGACGTCAACTACGAGAACTCAAACTGAC  
ATTAAGGTGGTTGACAGAGATTCTGAAGAGGCCGAGGTCATCAGGAAGTACGTGAAGAAC  
ACTCATGCTACCACGCACAACGCCTATGACCTGGAAGTGATCGATATCTTCAAGATAGAG  
CGCGAGGGGGAGAGCCAGCGCTACAAGCCCTCAGGCAGCTTACAACCGGAGGCTGCTG  
TGGCACGGCTCCAGGACCACCAACTTGTGTCATCCTGTGCGAGGGTCTGCGGATAGCC  
CCACCTGAAGCGCCTGTGACAGGCTACATGTTGGGAAAGGGATCTACTTTGCCGACATG  
GTGTCCAAAAGTGCAAATACTGCCACACATCTCAGGGAGACCCGATTGGCTTAATACTG  
CTGGGAGAGGTTGCCCTTGGAAACATGTATGAACTCAAGCATGTTTACATATCAGCAAG  
TTACCCAAGGGCAAGCACAGTGTCAAAGGTTTGGGAAAACCACCCCTGACCCTTCGGCC  
AGCATCACCTGGAGGGTGTAGAGGTTCCACTGGGAACAGGGATCCCATCTGGTGTCAAC  
GACACCTGCCTGCTGTATAATGAGTACATTGTCTACGACATTGCTCAGGTGAATCTCAA  
TACCTGCTGAACTCAAGTTCAATTTAAGACATCCCTGTGG

>common\_starling\_PARP1

ATGGCGGAGGAGCGGAGAAGCTGTACCGGGCCGAGTATGCCAAGAGCGGCCGCGCCTCC  
TGCAAGAAATGCGGCGAGAGCATCGCCAAGGACTCGTGTGCGCTGGCGCTCATGGTGCAG  
TCACCCATGTTTGTAGGCAAAGTCCCTCACTGGCACCACTACAGCTGCTTCTGGAAGCGG  
GCTCGAATTTGTCCACACAGACATTGATGGCTTCCCGGAGCTTCGGTGGGAAGATCAG  
GAGAAGATCAAGAAAGCCATTGAACTGGAGGCGCTGGAGGAGGAAAAGGAGGGGAGCAG  
GAAGGAGGTGGTAAGGCTGAGAAGAGCCTACATGACTTTGCTGCAGAATATGCCAAGTCT  
AACAGAAGTACTTGCAAAGGCTGTGAGCAGAAAATAGAAAAGGGCCAGATCCGGATTTC  
AAGAAAATGGTGCATCCTGAAAAGCCACAGCTGGGAATGATTGATAACTGGTACCACCCA  
GACTGCTTCGTGAGCCGCCGAGCAGAGCTCGGCTTCCCTCCGGCCTACGGGGCCACTCAG  
CTCCTGGGCTTCAGCATCTTGAAGCTGAAGATAAAGAACTCTGAAGAAGCAGCTCCCA  
GCTACCAAAGCGAAGGAAAGAGAAAAGGAGAAGAGGTAGATGGAAATGCAACAGCGAAA  
AAGAAGCCAAAAAAGAAAAGGAGAAAGAATCAAAGCAGCAAAAACAGCTGAAGGAGCAG  
ACAGAGCTGATCTGGGGCATCAAGGATGAGCTGAGGAAGGTCTGCTCCACCAATGACCTG  
AAAGAGCTGCTGATTGCCAACAAGCAGGAGGTCCCCTCAGGGGAGAATGCCATCTTGAC  
CGAGTAGCAGATGGGATGGCATTGGAGCTCTGCTGCCCTGCGAGGAGTGCAAGGGGCAG  
TTTGTGTTCAAGAGTGACGCTTACTACTGTTCAAGGGATATCACTGCCTGGACCAAGTGC  
GTGGCTAAAACACAGACTCCCAACAGGAAAGATTGGGTAATCCCAAAGGAGTTCCGGGAA  
ATTCCTTACCTGAAGAAATTTAAATGTAAGAAGCAGGACAGAGTGTCCCTCCAGAGGCT  
GCAAGTGTGAACTCGGCACCTCCTCCTCTGCATCTGCTCCTTTGTGAGAGACTGTGTCT

ACACCCAGAGACAAACCACTGACCAACATGAAGATCCTGGTTGTCGGGAAGTTGTCAAAG  
AACAAAGAGGAGGTGAAAAGCATTGTGGAGGACCTGGGAGGAAAGATGACCACCACAGT  
AACAAAGGCCACCCTGTGCATCAGCACCCAGAAGGATGTGGAGAAAATGAGCAAGAAGATG  
GAAGAAGTGAAGGAGGCCAAAGTCCGTGTGGTCTCAGAGGCATTTCTCAGGATGTGAAA  
TCTCCAGCAAGGACTTCCAGGAGCTTGTATCTCTCCATGCCCTTTCACCTTGGGGTGCA  
GAGGTGAAAATGGAGCATGAGGAAATGGCTGTGGATGGGAAGAGCAGCAAGCCTCCAAGT  
ACAAAAAGCACTGGGAAGGTCAAAGAAGAACAAGGACCTAGCAAGTCTGAAAAGAAAATG  
AAGTTAACAGTGAAGGGTGGAGCAGCAGTAGACCCTGATTCTGGTTTGGAGGATTCTGCT  
CATGTCTTTGAAAAAGGTGGGAAAATTTTTCAGTGCAACCCTGGGACTAGTAGATATTGTG  
AAAGGAACAAATTCCTATTATAAACTGCAGCTGCTAGAGGATGACAGAGAGAACAGGTAC  
TGGGTGTTCCGATCCTGGGGCCGTGTGGGCACGGTAATCGGCAGTAACAAGCTGGAGCAG  
ATGCCATCAAAGAAGATGCCATTGAACACTTCTGAATTTGTATGAAGAGAAAATGCGC  
AATTCTTGGCATTCAAAGAACTTACTAAATATCCAAAAAATTTTACCCACTGGAAATA  
GATTACGGACAGGATGAAGAAGCTGTCAGGAACTGACAGTAGGTGCTGGGACAAAATCA  
AAACTCGCTAAGCCAATCCAAGATCTTATTAAGATGATCTTTGATGTGGAGAGCATGAAG  
AAAGCAATGGTGAATTTGAGATTGACTTGCAGAAGATGCCATTGGGAAAATGAGCAAG  
CGACAGATCCAGAGTGCATACTCCATCCTGAATGAGGTTTCAGCAGGCAGTTTCTGACAGT  
GGTTCAGAATCTCAGATTTTGGACCTCTCCAACCGCTTTTACACACTGATTCCTCATGAC  
TTTGGGATGAAGAAGCCACCTCTCCTAAATAACTTGAATACATTCAGGCTAAAGTGCAG  
ATGTTGGACAACCTGCTTGATATCGAGGTTGCTTACAGCCTTCTCAGAGGTGGAAATGAA  
GATGGAGATAAAGACCCAATTGACATCAACTATGAAAACTCAAGACGGATATTAAGGTT  
GTTGACAAAGATTCAGAAGAAGCCAAGATTATCAAACAATATGTGAAGAACAACACTCACGCT  
GCTACGCACAACGCATATGACCTCAAAGTCGTGGATATCTTTAGGATTGAGCGTGAGGGG  
GAGAGCCAGCGTTTCAAGCCCTTCAAGCAGCTCCACAACCGCCAGCTGCTGTGGCACGGC  
TCCCGCACCACTTCCGCGGGATCCTCTCGCAGGGTCTGCGGATAGCTCCGCCTGAA  
GCTCCTGTGACCGGCTACATGTTCCGGGAAGGGCATCTATTTGAGACATGGTATCCAAG  
AGTGCAAACACTGTACACATCTCAAGCTGATCCCATAGGTTTAGTACTACTGGGAGAA  
GTTGCCCTTGGAAATATGTATGAACTAAAGAATGCTTCCACATCACAAAATTGCCAAG  
GGAAAACACAGTGTCAAAGGCTTGGGCAAAACGGCGCCTGATCCCACAGCCACTACCACC  
CTTGGTGATGTAGAGGTTCCCTTAGGGAATGGGATCTCCACAGGAATTAATGATACCTGT  
CTTCTGTATAATGAATATATTGTGTATGACGTTGCTCAGGTAAATTTGAAGTACCTGTTG  
AAACTGAAATTCAACTACAAGACATCACTCTGG

>central\_bearded\_dragon\_PARP1

ATGGCCGAGCCTGCGGAGAAGTTGTACCGGGCCGAGTACGCCAAGAGCGGCCGGGCTTCG  
TGCAAGAAATGCGGGGACAGCATCGCCAAGGACTCGCTCCGCCTGGCCATCATGGTGCAG  
TCTCCCATGTTTGTATGGTAAAGTACCCCACTGGCACCCTTTTCTGTTTCTGGAAGCGA  
GCTCGACTGGTGTCCCACTCTGATATAGATGGCTTCTCGGAAGTGCCTTGGGAAGATCAA  
GAGAAAATTAATAATCCATAGAAAGTGGTGGTGTAGCACAGGCAAAGGTGGTGACCAA  
GAAGGAGGTGGCAAAAATGAGAAGAGTTTAAATGATTTTGCAGCAGAATATGCAAAGTCG  
AACAGAAGTACTTGCAAAGGCTGTGAACAGAAGATAGAAAAGGGTCAAATTAGAATTTCA  
AAGAAAATGGTGCATCCTGAAAAGCCCCAGCTGGGGATGATAGACAACTGGTATCACCCA  
GCATGCTTCATCAGCCGAGAGCAGCTCTGGGGTTTCTTGCTACCTTCAGTGCTTCTCAG  
CTCTTAGGCTTTGGGCTCCTGAGCGCAGAAGATAAGGAGACTCTGAAGAAGCAGCTGCCT  
GCTCTTAAAAATGAGGGAAAGAGAAAAGGGGATGAGATGGATGCCAATGTGATTTCAA

AAGAAACCGAAAAAGAGAAAGAAAAACAGTCCAAACAGGAGAAGCTGCTCAAGGAACAG  
ACAGAATTGATTTGGCACATCAAAGATGAGTTAAAGAAAGCCTGTTCCACCAATGATCTG  
AAAGAGCTCCTCATAGCCAACAAGCAGGAAGTTCCTTCTGGGGAATCTGCTATCGTGGAC  
CGTGTTCAGATGGGATGGCCTTTGGGGCCCTTCTGCCTTGTGAGGAGTGCAAAGGGCAG  
TTTGTATTCAAGGGTGATGCTTACTACTGCACTGGGGACATCACGGCTTGGACCAAGTGT  
GTTGCCAAGACACAACTCCCAACAGAAAAGAGTGGGTAATCCCTAAGGCATTCCGAGAA  
ATTACATATTTGAAGAAATCAAGTTTAAGAGGCAGGATAGAGCATTCCCTCCAGAAGTG  
GCTTCGACAACTCAGCACTTCTCCAAAAGTATCTGCTCCTATTACAGAGAATTCAGCT  
GCTCCACCAGATAAACCATTAAATAATATGAAAATTCTGATCCTTGGGAAATTGTCAAAA  
ACCAAAGATGAAATCAAGTCTGCCATTGAAGAACTTGGGGGAAGATGACAACACTACTGTG  
AATAAAGCTGACCTGTGCATCAGCTCACAAAAGGAAGTTGAGAAAATGAACAAGAAAATG  
GAAGAAGTGAAGGAGGCCAGGTGCGGGTAATCTCGGACACCTTCTGCAGGATGTGAAG  
TCCTCCAGCAAGGGTTTCCAGGAACTTCTGTCCCTTACGCTCTCTCTCCCTGGGGTGCA  
GAAGTCAAGCAGGAGCACAAAGAGGTGTTTGTTGGAAGAAAAACCCAGTGGGCATTCAAAC  
ATGAAGAGCACTGGGAAGAATAAGGATGAACAAGGCACAAGCAAGTCTGAAAAGAAAATG  
AAGCTGACAGTCAAAGGAGGTGCTGCTGTAGACCCCGATTCAAGGCTTGGGAAGATACTGCT  
CATGTCTTTGAAAAAGGTGGCAAAATCTTCAGTGCCACTTGGCCTCGTAGATATTGTC  
AGAGGAACAAATTCATATTACAAGCTTCAAGCTGCTAGAAGATGACAGAGAACTCAGATAC  
TGGGTTTTCCGCTCTTGGGGTCGTGTTGGAACAATTATTGGAAGCAACAAATTAGAGCAG  
ATGTCTCTAAAGAGGAAGCTACTGAACACTTCTGAATTTGTACGAAGAGAAGACAGGC  
AATTCCTGGCATTCAAAAAATTTCACTAAATATCCCAAAAAATTTCTACCCTCTGGAAATA  
GACTATGGACAGGATGAAGAAGCAGTGAAGAACTGAAAGTGAGTGCAGGCACAAAATCA  
AAGCTTCAAAGCCAGTTCAGGACCTTATAAGATGATCTTTGATGTGGAAAGCATGAAG  
AAAGCGATGGTGGAAATTTGAGATTGACCTCCAAAAGATGCCTTTGGGAAAGCTAAGCAAG  
AGGCAGATCCAGAGTGCATATTCCATTCTTAATGAGGTGCAGCAGGCAGTTTCCAATGGT  
GGCACAGAGTACAGATACTGGATCTCTCAAATCGCTTTTACACTCTCATCCCTCATGAT  
TTTGGGATGAAAAAGCCTCCTCTTTTAAACAACCTGGACTATATTAAGTCCAAAGTGGAG  
ATGCTCGACAATCTGCTTGATATTGAAGTTGCTACAGCCTGCTCAGAAGTGGTGGTCAA  
GATGGGGATAAAGATCCAATAGATGTGAACTATGAAAAGCTCAAGACAGACATAAAGGTA  
TTAGACAAAGACTCAGAAGAAGCCAGGATCATAAAGCAGTATGTGAAGAATACCCATGCA  
AGCACCCACAATGCTTATGATTTGAAAGTACGGAGATTTTCAAGATTGGGCGTGAAGGA  
GAAAGCCAGCGTTACAAGCCATTCCAAGAATTACACAATCGCCAGTTGCTCTGGCATGGC  
TCTCGTACTACCAATTTGCTGGTATTTTGTCCCAGGGTCTCCGAATTGCTCCCCCTGAA  
GCTCCCGTACTGGCTATATGTTTGGTAAGGGTATCTATTTGCGGATATGGTATCCAAG  
AGTGCCAACACTACTGCATACCTCTCAGACTGACCCAGTCGGCTTAATCTTGCTTGGAGAA  
GTTGCCCTTGGAAATATGTATGAACTTAAAAATGCTTCCCACATAACCAAGCTCCCGAAA  
GGAAAACACAGTGTCAAAGGTTTGGGCAAAAACAGCACCAGATCCTTACGCCACTATATCA  
CTTGATGGTGTGGATGTTCTTTAGGCCCTGGAATTCCCTCTGGAGTTAGTAACACTTGT  
CTTCTGTATAATGAATATATTGTTTACGATGTTGCTCAAGTAAATCTGAAGTACCTGCTA  
AAACTGGATTTCAATTATAAGACATCACTCTGG

>spotted\_gar\_PARP1

ATGGCGGATTCACAAGAGGAGAAGCTGTACAAAGCCGAATACGCTAAAAGTGGTCGAGCT  
TCTTGCAAGAAATGCAAAGACAATATCGAAAAGATTCTCTCCGGATGGCTATAATGGTG  
CAGTCTCCCATGTTGATGGCAAAGTCCCCATTGGCATCACTTCTCTGCTTCTGGCAA

AGAGTATCAGTCCAGTCCCCAGGGGATATTTGGGGTTCACAGACCTCAGATGGGAAGAC  
CAGGAGAAGGTGAAGAAAGCCATTGAGACAGGAGGTGCAAGTTCTGGAGGAAAGGGTGAC  
GCAAAGGGTGGTGCCAAAGGAGAGAAGACATTGAATGATTTTGCAGTGGAATATGCAAAG  
TCCAACAGGAGCACCTGCAAGGGATGCAATGAGAAAATAGAGAAGGATCAAATCAGGGTG  
TCTAAGAAGACAATTGACCCAGAGAAGCCTCAGTTGGGCTTAATTGACCGCTGGTACCAC  
ACAGGCTGCTTTGTAAGCAGAAGGGAGGAACTGGATTTCAAACCTGCCTACTGCGCCTCG  
CAGCTTAAAGGATTGCGCGCTTTAAGAGCAGAGGATAAAGAAGAGCTGAAGAAAAGGCTG  
CCAGTTGTCAAGACTGAAGGAAAAAGGAAGGGAGATGAAGTAGACGGAGATGCCACGGCC  
AAAAAGAAGCAGAAGAAAGAAGAAAAGGAAGAGAAGCAGCGTGAGAAGCAGCTTAAGGAA  
CAGAACCAGCTCATCTGGAACATCAAAGATGAGTTGAAGAAGTCTGCTCCACCAATGAC  
ATGAAGGAGCTTCTATTGCAAATGGTCAGGAAGTGCCTTCAGGAGAATCCAACATCCTG  
GACAGCCTCTGACTGCATGGCGTTTGGTGCCTGAAACCCTGTGAAGAATGCCAAGGC  
CAGCTGGTCTTCAAGAGTGATGCTTATTACTGTACCGGAAACATCTCGGCCTGGACCAAG  
TGTGTCTCCAAAACGCAGACGCCCAACCGAAGGACTGGGTCACTCCTAAGGAATTCAT  
GAGATCCCCTACTTGAAGAAGTTCAAGTTCAAACGCCAGGACAGAGTGTTCGCCGAATA  
GAGGCCACATCTGCGCCAGTTCACCAGTACCAGTGCAGCTGGTGTGACAGAGTCTGCT  
CCAGTTCCAGCAGATAAACCCCTGACAGGCATGAAGATCCTGTGCATCGGGAAGCTGGTG  
AAGAACAAGGACGAGCTCAAAGTTACTGTGGAGGAACTGGGAGGGAAGATCACTGGGACG  
GCCAACAAAGCCAATCTGTGTATCAGCACAAAGAAGGAGGTAGAGAAGCTAAGCAAGAAG  
ATGGAGGAAGTGAAGGAGGCAGGTGTCCGGGTGGTGGCAGAGAACTTCTGTCCGATATC  
AAGTCTTCGGACAAGGCCTTCAGGAGCTGGTGTCCCTTACGGCCTTTGCGCGTGGGGC  
GCGGAGATCAAGCAGGAGAATCCTGCTCCGGCTGCCAAGTCCAGCGGTGCTCCTGCCAGC  
AAGAGCTCGGGGAAAGTGAAGAAGAAGAAGGTTCCAGTAAATCCAAGAAGATGAAATTA  
ACAGTAAAAGGAGGAGCTGCAGTGGATCCAGACTCAGGTCTGGAGGACCGTGCGCATGTT  
CTTGATCAAATGGTAAAATCTTCAAGTGCACACTTGGTCTGGTGGATATTGTCAGAGGA  
ACAAATTCGTACTACAAGCTGCAGCTGCTGGAAGACGATGTCAAAAAGCGGTACTGGGTG  
TTCAGGTCTTGGGGCCGTGTGGGCACAACCTATTGGTGGCAATAAATTGGATAAATTTCT  
GACAAGAACTCCGCTATTGAAAATTTCTAAGTCTTTATGAAGAAAAAACTGGAAATTC  
TGGAATCCACCAACTTCACAAAATACCCAAACAAATTTTACCCTCTGGAGATCGACTAT  
GGACAGGATGAAGAAGCAGTGAAGAAGCTGACAGCCAGTGCAGGCACTAAGTCCAAGCTG  
GAGAAACCTGTTTCAAGGAGCTCATTAGGATGATCTTTGATGTGGAGAGCATGAAGAAGGCC  
ATGGTGGAGTTTGGAGATTGACCTGCAGAAGATGCCCTGGGCAAGCTGAGCAAGAGGCAG  
ATTCAGAGCGCGTACTCCATCCTCAGTGAGGTGCAGCAGGCTGTGTCTGACAATGCCTCT  
GATTCACATATATTGGATCTGTCCAATCGGTTTTATACACTTATACCGCATGACTTTGGG  
ATGAAGAAACCACCCCTCTGAATAATCTGGATTATGTTCAAGGCAAAGTCCAGATGTTG  
GATAATCTTCTGGATATTGAGGTGGCATAACAGCCTTCTCTGTGGTGGAACAGAAGATGAT  
AAAAAAGATCCATTGACATCAACTATGAGAAGCTCAAACCTGAGATTCAGTTGTTGAT  
CTGACGTCAAAGGAAGCTGAGGTCATTCTGGAGTACGTCAAGAACAACCTCATGCTGCTACA  
CATAATACCTACACGCTTGGAGTGGAGGAGGTTTTCAAGATAGCCCGGAGGGCGAGTAC  
CAGCGCTACAAGCCCTTCAAAGACTTGCCCAACCGTCAGCTGCTGTGGCATGGCTCTCGT  
GCCACAACTACGCTGGTATCCTGTCTCAGGGCCTGCGCATCGCGCTCCTGAGGCCCT  
GTGACAGGTTACATGTTTGGTAAAGGTATCTACTTTGCTGACATGGTGTGGAAGAGTGCT  
AATTAAGTCCACACTCAACAACCTGATCCAGTGGGTCTGATTCTGCTGGCAGAGGTTGCT  
TTAGGAAATATGCATGAATTGAAGAGGGCTTCGCATATTACAAAATTACCTAAGGGTAAA

CATAGTGTTAAAGGTGTGGGTAAAACTGCTCCAGATCCAAGTAGCACTGTGACTTTGGAT  
GGCATGCAAGTTCCACTGGGAAAAGGCATCAACACTAATATTCAGGACACCAGCCTGCTG  
TACAATGAATACATTGTGTATGATGTGGCACAGGTGAATCTGAAGTACCTGTAAAGATC  
AAGTTTAACTACCAGAGCTCTCTGTGG

>guppy\_PARP1

ATGGCGGACAACCAGGAGGAGAAGCTGTACAAGGCCGAGTACGCTAAAAGCGGCCGCGCC  
TCTTGCAAGAAATGCAAAGATAGCATCGCTAAAGACTCGCTGAGGATGGCCATCATGGTG  
CAGTCGCCCATGTTTGACGGGAAGGTCCCCACTGGCACCACTTCTCCTGCTTCTGGCTG  
CGAGCGGCGCCTCAGTCCACGGCTGATATCGCTGGGTTTTCCGATCTGCGCTGGGATGAC  
CAGGAGAAGGTGAAAAAGGCCATCGAGAGCGGCGGAGCAGTCCGAATAGGAAAGGGTAGC  
CAGAAGAGTGCAGCTAAAGGAGAAAAGACTCTGAACGATTTTGCGGTGAATATGCCAAG  
TCGAACCGCAGCACGTGCAAAGGCTGCGAGCAGAAAATAGAAAAGGACCAGATTCGTGTG  
TCCAAGAAGACGGTGGATCCGGAGAAGCCTCAGCTGGGCCTGATCGACCGCTGGTACCAC  
ACGGCGTGCTTCGTGTCCCGCAGGGAGGAGCTGGTGTGTTAGGCCTGAATACGGCGCCGCC  
CAGCTGAAGGGATTCAACGCGCTGCGTGCGGAAGACCAGGAGGAGCTGAAGAAGAGGCTG  
CCTGCTGTCAAATCTGAAGGGAAGCGTAAATCCGACGAGGTGGACGGAGCATCAAAGAAG  
CAAAAGAAAGAGGAAGAGGAGGAGAAGAAGAAGCTCGAGGAGCAATTGAAGAATCAAAGC  
CAGCTGATTTGGGGTATTAAAGACAAGCTGAAGAAACATTGTTTCAGTCAACGACATGAAG  
GAGCTGCTGATTGCAAACGGCCAGGATGTTCCGTCCGGAGAGTCCAACGTGCTGGACAGC  
CTGGCTGACGGCATGGCCTTCGGTGCTCTGGACTCCTGTAACGAGTGCAAGGGCCAGCTG  
GTGTTTAAAGGAGACTTGATTACTGTTCTGGAGACATTTACGCTGGACAAAGTGTGTG  
TTCAAACCAAATTCCTTACGCAAAGACTTTGTCGTCCCTAAGGAATTCCACGAAGTT  
TCTTTTCTAAAGAAATTTAAATTCAGAGGCAGGACAGGGTTTACCCCAAGGAGGCTCCC  
GCTCAAACCTCTGAAACCAGCAAAGCCGAAACCCTGGCGAGCGCTCCAGTGCTCCAGT  
GAGCGACTGCTGGAAGCAGCACCTTCAGACAAACCTCTAACTGGTATGAAGCTGCTGGCT  
GTCGGCAAGTTATCTAAAAACAAAGATGATCTGAAGGCAGCCGTGGAGGAACTGGGTGGA  
AAAATTACGGCACTGCCAATAAGGCCTCTCTCTGCTCAGCTCCAAGAAGGAGGTGGAG  
AAGATGGGTAAGAAGATGGAGGAAGTGAGAGACGCAGGCGTGCGAGTCGTCTCGGAGGAT  
TTCCTCTCGGACATCAAGTCATCGGGTAAAGCTCTGCAGGAGCTGGTGTCTTTCAGCC  
ATCTCACCTGGGGCGCAGAAGTTAAGGCTGAACCTCAGGCTCCAGCTGCAACCTCCAAA  
TCTGGAGCTCTGTCTTCAAGAGCACCGGCAGGGTAAAGGAGGAAGAAGGTGGTAGTAAG  
GCCAAGAAGATGAAGCTGACAGTCAAAGGCGGAGCTGCTGTGGATCCAGACTCGGGTCTT  
GAAAACAGTGCCCATGTCTGGAGCAGAATGGGAAGATGTACAGTGCTACTTTGGGTCTT  
GTGGACATCGTCAGAGGAACAAACTCTATTATAAGCTGCAGCTGCTGGAGGATGACGTA  
CAAAAAAGATACTGGGTTTTTCAGGTCTTGGGGCAGAGTGGGCACCACCATTGGAGGCAAC  
AAGCTGGACAAATTCATGACAAGAACTCTGCGCTGGATAATTCCTTGGTGTGTTATAAG  
GAAAAGACTGGAAATGACTGGGGTACCTCCAACCTCACTAAATATCCAACAAGTTCTAC  
CCTCTGGAGATTGACTATGGACAGGACGAGGAAGCGGTGAAACGGCTGACGGCCTCTGCT  
GGCACCAGTCTAAGCTGGACAAACCAGTTCAGGATCTGATTAAGATGATCTTTGACGTA  
GAGAGCATGAAGAAGGCCATGGTTGAGTTGAGATTGATCTGCAGAAGATGCCGCTTGGC  
AAACTGAGTAAGAGACAAATCCAGAGTGCCTACGCTCTTCTGACTGAAGTACAACAGGCT  
GTGTCCGACAGCGTACCTGAGGCACAGATACTGGATCTCTCCAATCGCTTCTACACCCTC  
ATTCCTCATGACTTCGGCATGAAGAAACCTCTCTCTCAACAACCTGGATTACATTGAG  
GCTAAAGTTGAGATGCTGGACAACCTGCTGGACATCGAGGTCGCTACAGCTTGCTGAGA

GGAGGAGCTCAGGACAACGAGCACGATCCTATTGACATCAACTACGAGAAGCTCAAAA  
AAGATCGAGGTCGTTGACAAGACCACGCAGGAGGCTGAGATCATCATGCAATACGTTAAA  
AACACCCACGCGGCTACACACAACACCTACACCCTGGAAGTGCAAGACATCTTCAAAGTC  
GCACGAGAAGGAGAGCAACAACGCTACCGTCCGTTTGAGGAGCTACACAATCAACAGCTA  
CTGTGGCACGGCTCTCGCGCCACAACTACGCTGGTATTCTGTCTCAGGGTCTTCGCATT  
GCACCTCCAGAGGCCCTGTGACTGGCTACATGTTCCGGCAAAGGTGTGTACTTTGCCGAC  
ATGGTGTCCAAGAGTGCAAACACTGCCACACCTCTCAGTCGGACCCTGTGGGACTCATT  
CTGCTGGCAGAGGTGCTCTAGGCAACATGCATGAACTGAAGAAAGCCTCTCACATTCA  
AAATTACCAAAGGGAAAGCACAGTGTTAAAGGTTTGGGTAGAACCGCTCCTGATCCAAAT  
GCATCTGCCACTTTGAACGGGGTGCAAGTGCCTCTGGGAAAAGGAGTCAATACTAACATT  
GATGACACAAGTCTACTGTACAACGAGTACATTGTATATGATGTGGCTCAGATAAACTTG  
AAGTATCTCCTGAAGATCAGGTTTAACTACCAGACATCTCTGTGG

>Anole\_lizard\_PARP1

ATGGCGGAGTCTGCGGAGAAGCCGTACCGCGCCGAATACGCCAAGAGCGGCCGGGCTTCG  
TGCAAGAAATGCGGCGACAACATCGCCAAGGACTCGCTCCGCCTGGCCATCATGGTGCAG  
TCTCCCATGTTTGATGGCAAAGTACCCATTGGCATCACTTTTCTTGCTTCTGGAAACGC  
GCTCGACTGATATCCCATGCTGATGTGGATGGCTTCTCAGAAGTGCCTGGGAGGATCAG  
GAGAAGATTAATAAATCTATTGAAGCTGGTGGTGCTGGAACAGGGAAGGCGGGGAAAAC  
GAAAAGAATTTAAATGATTTTGCAGTAGGATATGCAAAGTCCAACAGAAGTACCTGCAAA  
GGCTGTGAACAGAAGATAGAAAAGGGTCAATTAGAAATTTCAAAGAAAATGGTGAACCT  
GAGAAGCCCCAGTTGGGGATGATAGACAAGTGGTACCATACTTCTGTTTCATCAACTGC  
AGAGGAGATCTGGGTTTCTTACTACCTTTAGTGCCTCTCAGCTCTTAGGATTTGGGATC  
CTGAATGAAGAAGATAAAGAGGCTCTGAAAAGGAGCTGCCTGCTCTTAAGAATGAAGGA  
AAGAGAAAAGGAGATGAAGTAGATGGTGTGTAGTATCTAAAAAGAAACAAAAAGGAG  
AAAGAAAAACAGTCCAAACAGGAGAACTGCTAAAGGAGCAGACAGAGCTGATTTGGAAC  
ATTAAGATGAACTAAAGAAAGCATGTTCCACCAATGACCTCAAAGAGCTCCTGATTGCC  
AACAAACAGGAAGTTCCTTCTGGGGAATCTGCTATCTTGACCAAGTTGCAGATGGGATG  
GCTTTTGGGGCTTTGCTGCCCTGTGAGGAGTGCAAAGGCCAGTTTGTGTTCAAATGTGAT  
GCTTACTACTGCACTGGGGATATTACGGCTTGACAAAATGTGTTGCCAAGACACAGTCT  
CCCAACAGGAAAGAATGGATCATCCCAAAGGCCTTTCGGGAAATCACATATCTGAAGAAA  
TTCAAGTTTAAAAAGCAGGAAAGAGTGTCCCTCCAGAGGCTGCTTGTAACACCCTGTA  
CCACCTCCAGCAGTTTCTCCACTCCCGTTATAGAAAACCTCCACCACCCAGCAGATAAA  
CCATTAATAGCATGAAGATTTAGTCCTTGGGAAATTGTCAAAAAACAAGGATGAAATC  
AAATCTGCCATTGAAGAACTTGGAGGAAAAGTGACAGCTACTGTGAATAGAGCAAACCTG  
TGCATAAGCTCACAAAAGGAAATTGACAAGATGAATAAGAAGATGGAGGAGGTGAAACAG  
GGCCAGGTGCGAGTTGTCTCAGAAGAGTTCCTCCAGGACGCAAAGGCCTCCAGCAAGGGC  
TTACAGGAGCTTTTGTCACTCCATGCGCTCTCTCCGTGGGGCACAGAGGTCAAGCAGGAA  
CACAAAGAGGTGTTTGTGGCAGAAAAATCCAGTGGACACTCGAACATGAAAAGCACTGGA  
AAAAACAAGGAAGAACAAGGAACCAGCAAGTCTGAAAAGAAAATGAAGCTGACAGTGAAA  
GGAGGTGCTGCTGTAGATCCTGATTGAGGCTTGAAGATTCTGCTCACGCTTTGAAAAA  
GGTGCTAAAATCTCAGTGTACTCTTGGTCTGTTGATATTGTCAGGGGAACAAATTCA  
TATTATAAGCTTCAGTTACTGGAAGATGACAGAGAACTCAGATACTGGGTTTTCCGTTC  
TGGGGTCTGTTGGCACAAGCATTGGGAGCAATAAACTAGAACAGATGCCATCTAAAGAA  
GAAGCCATTGAACATTTCTGAATCTGTATGAGGAAAAGACAGGGAACCTCCTGGCATTCC



AAAAATTTCACTAAGTATCCCAAGAAATTCTACCCTCTGGAAATAGACTATGGACAGGAT  
GAAGAAGCGGTGAAGAACTGACAGTGAGTGCAGGAACCAAATCAAAGCTTCCCAAGCCA  
GTCCAAGACCTTATTAAGATGATCTTTGATGTGGAAAGCATGAAGAAGGCCATGGTGGAA  
TTTGAGATTGACCTCCAGAAAATGCCTTTGGGGAAGCTAAGTAAGAGGCAGATTCAGAGT  
GCGTACTCCATCCTTAATGAGGTTGAGCAGGCTGTTTCTGATGGTGGCACAGAATCACAG  
ATACTGGATCTCCAATCGCTTTTACACTCTAATCCCTCATGACTTTGGGATGAAAAAA  
CCTCCCCTTTTAAACAGTCTGGACTACATTAAGTCCAAAGTGGAGATGCTGGACAATCTG  
CTTGACATTGAGGTGGCCTACAGCCTACTCAGGAGCGGTGCTCAGGATGGGGATAAAGAT  
CCAATAGATGTGAACTATGAAAACTGAAGACAGATATTAAGGTAGTAGACAAAGACACA  
GACGAAGCCAAGATCATAAAGCAGTATGTTAAGAATACCCATGCAAGTACCCACAATGCA  
TATGACTTGGAAGTTGTGGAGATTTTCAAGATTGAACGTGAAGGAGAATATCAGCGTTAT  
AAGCCATTCCGAGAATTGCACAATCGTCAGTTACTCTGGCATGGTTCTCGCGCTACCAAC  
TTTGCTGGTATTTTGTACAAGGTCTCCGAATAGCTCCCCCTGAAGCGCCAGTGACTGGC  
TACATGTTTGGGAAAGGTATCTACTTTGCAGATATGGTGTCTAAGAGTGCCAACTACTGT  
CATACTTCTCAGACTGATTAGTAGGCTTAATCTTGCTGGGAGAAGTTGCCCTTGAAAT  
ATGTATGAACTGAAAAATGCTTCTCACATAACTAAGCTACCAAAGGAAAACACAGCGTC  
AAAGGTTTGGGCAAAACAGCACCAGATCCTTCAGCCACAGTGTCTTAATGGCGTGGAC  
GTTCTTTAGGCTCTGGCATCCCATCTGGAGTTAGCAATACCTGTCTTTTATATAACGAA  
TATATCGTCTATGATATTGCTCAGGTAAATCTGAAGTACTTGCTGAAGCTGGATTTCAAG  
TATAAACTTCCCTCTGG

>Rock\_pigeon\_PARP1

ATGTTTGATGGCAAAGTCCCTCACTGGCACCCTACAGCTGCTTCTGGAAGCGAGCTCGA  
ATCTTGTCCCATGCAGACATTGACGGCTTCCCTGAGCTCCGGTGGGAAAGACCAGGAGAAG  
ATCAAGAAAGCCATTGAACTGGAGGCCCTGGAGGAGAAAAGGAGGGGAACAGGAAGGA  
GGTGGCAAGGCTGAAAAGAGCCTGAATGACTTTGCTGCAGAATATGCCAAGTCTAACAGA  
AGTACTTGCAAAGGCTGCGAACAGAAAATAGAAAAGGGCCAGATCCGGATTTCCAAGAAG  
ATGGTGCATCCTGAGAAGCCGAGCTGGGAATGATAGATAACTGGTACCACCCGACTGC  
TTCGTGAGCCGCCGAGCGGAGCTGGGCTTCTCCCGGTGTACGGGGCCACCCAGCTCCTG  
GGCTTCAGCATCTTGAAAGCTGAAGATAAAGAACTCTGAAGAAGCAGCTCCCGGTACC  
AAGAGTGAAGGAAAGAGAAAAGGAGAAGAGGTAGACGGAAATGTGACTGTGAAAAAGAAG  
CCGAAAAGGAAAAAGAGAAAGAATCAAAGCAGGAAAAGCAGCTGAAGGAGCAGACACAG  
CTGATCTGGAGCATCAAGGATGAGCTGAGGAAGGTCTGTTCCACTAACGACCTGAAAGAG  
CTGCTGATCGCCAACAAGCAGGAAGTTCCCTCAGGGGAGAATGCTATTTTGGACCGAGTA  
GCAGATGGGATGGCATTGAGGCCCTGCTCCCGTGCAGGAGTGTAAGGGGCAGTTTGTG  
TTCAAGAGCGACGCATATTAAGTGTGCGGGGATATCACTGCCTGGACTAAGTGTGTTGCT  
AAAACACAGACTCCCAACAGGAAAGACTGGGTGATCCCAAAGGAGTTTCGGGAAATCCCT  
TATCTGAAGAAATTAAGTGAAGAAGCAGGACAGGGTGTTCCTCCAGATGCTGGGACT  
GGGAACTCTGTGCCTCCTCCCTCCGCATCTGCTCCTCCGACAGAGACGGTGTCCGACCC  
AGAGACAAACCGCTGACCAATATGAAGATCCTGGTTCTTGAAAAGTGTCAAAGAACAAG  
GAGGAGGTGAAGAGCATTGTGGAGGACCTGGGGGAAAGATGACGACGACAGCTAACAAG  
GCCACTCTGTGCATCAGCACACAGAAGGATGTGGAGAAAATGAGCAAGAAGATGGAAGAA  
GTGAAGGCGGCCAAAGTCCGTGTAGTCTCAGAGGAGTTTCTCAGGATGTGAAATCCTCC  
AGCAAGGACTTTCAGGAGCTTGTCTCTCCATGCATTTACCTTGGGGTGCAGAGGTG  
AAAATGGAGCACGAGGAAATGGCCGTGGATGGGAAGTGCAGCAAGCCCCGAGTATGAAG

AGTGCTGGGAAGGTCAAAGAAGAACAAGGACCTAGCAAGTCTGAAAAGAAAATGAAGCTA  
ACAGTGAAGGGTGGAGCGGCAGTAGATCCTGATTGGGTTTGGAGGATTCTGCTCATGTC  
TTTAAAAAGGTGGAAAGATTTTCAGTGCAACCTGGGCCTAGTAGATATTGTGAAAAGGA  
ACAAATTCCTATTACAACTGCAGCTGCTAGAGGATGACAGAGAGAACAGATACTGGGTG  
TTCAGATCTTGGGGTCGTGTGGGCACTGTAATTGGGAGTAACAAGCTGGAGCAGATGCCA  
TCAAAGAAGATGCCATTGAACACTTCTTGAATTTGTATGAAGAGAAAAGTGGAAATTCA  
TGGCATTCAAAGAACTTCACTAAATATCCAAAAAATTCTACCCGCTGGAAATAGATTAT  
GGGCAGGATGAAGAAGCTGTCAAGAACTGACAGTGGGTGCTGGGACTAAGTCAAAAATT  
CCTAAGCCAATCCAAGACCTTATTAAGATGATCTTTGATGTGGAGAGCATGAAGAAAGCG  
ATGGTGAATTTGAGATTGACCTACAGAAGATGCCATTGGGAAAAGTGGAGCAAGCGACAG  
ATCCAGAGTGCCTACTCCNNNNNNNNNNNNNNNNNNNNCATGAAAGAAATGCAGTTTCTGACAAT  
GGTTCAGAATCCCAGATCTTGGACCTCTCAACCGCTTCTATACTCTGATTCTCATGAC  
TTCGGGATGAAGAAACCACCTCTCCTAAATAACCTGGAATACATTCAAGGCTAAAGTGCAG  
ATGTTGGACAACCTTGCTTGATATTGAGGTTGCTTACAGCCTTCTCAGAGGTGGAATGAA  
GATGGAGATAAAGACCCAATTGACATCAACTATGAAAAGCTTAAAAGTATTAAGGTT  
GTTGACAAAGATTCCGAAGAAGCCAAGATTATTAAGCAATATGTGAAAAATACTCACGCT  
GCTACTCATAACGCATATGATCTCAAAGTCGTGGATATATTCAAGATTGAGCGTGAAGGA  
GAGAGCCAGCGTTACAAGCCGTTCAAGCAGCTTCACAATCGCCAGCTGCTGTGGCACGGA  
TCCCGCACCAACTTTGCCGGGATCCTCTCACAGGGTCTCCGGATAGCTCCCCCTGAA  
GCTCCTGTGACTGGCTACATGTTTGGGAAAGGCATCTATTTGCAGACATGGTATCCAAG  
AGTGCCAATACTGCCACACATCTCAAGCTGATCCCATAGGCTTAGTACTACTGGGAGAA  
GTTGCCCTTGAAATATGTATGAGCTAAAGAACGCTTCTCACATAACAAAATTGCCAAG  
GGAAAACACAGTGTGAAAGGCTTAGGCAAAAAGTGCACCTGATCCCACAGCCACTACCACT  
CTTGGTGGGGTGGAGGTTCCCTTAGGGAATGGGATCTCGACGGGAATTAATGATACCTGT  
CTTCTGTATAATGAATATATTGTGTATGACGTTGCTCAGGTAAATCTGAAGTACCTGCTG  
AAACTGAAATCAACTATAAGACATCACTCTGG

>Great\_tit\_PARP1

ATGGCGGAGCCGGCGGAGAAGCTGTACCGGGCCGAGTATGCCAAGAGCGGCCGCGCCTCC  
TGCAAGAAGTGCGGCGAGAGCATCGCCAAGGACTCGCTGCGCCTGGCGCTCATGGTGCAG  
TCACCCATGTTTGTATGGCAAAGTCCCTCACTGGCACCACTACAGCTGCTTCTGGAAGCGG  
GCTCGAATTGTGCCATACAGACATTGATGGCTTCCCTGAGCTTCGGTGGGAAGATCAG  
GAGAAAATCAAGAAATCCATTGAACTGGAGGCCCTGGAGGAGGAAAAGGAGGGGAACAG  
GAAGGAGGTGGTAAGGCTGAGAAGAGTCTAAATGACTTTGCTGCTGAATATGCCAAGTCT  
AACAGAAGTACTTGCAAAGGCTGTGAGCAGAAAATAGAAAAGGGCCAGATCCGAATTTCC  
AAGAAGATGGTGCATCCTGAAAAGCCGAGCTGGGAATGATAGATAACTGGTACCACCCG  
GACTGCTTTGTGAGCCCGGAGCAGAGCTGGGCTTTCTCCAGCCTACGGGGCCACCCAG  
CTCCTGGGTTTCAGCATCTTGAAAGCTGAAGATAAAGAACTCTGAAGAAGCAGCTCCCA  
GCTACCAAGAGTGAAGGAAAGAGAAAAGGAGAAGAGGTAGATGGAAACGTGACTGCAAAA  
AAGAAGCAGAAAAAAGAAAAAGAGAAAGAGTCAAAGCAGCAAAAACAGCTGAAGGAGCAG  
ACAGAGCTGATCTGGGGCATCAAAGATGAGCTGAGGAAGGTCTGCTCCACCAATGACCTG  
AAAGAGCTGCTGATTGCCAACAAGCAGGAGGTCCCCTCAGGGGAGAATGCTATCTTGAC  
CGAGTAGCAGATGGGATGGCGTTTGGAGCTCTGCTGCCCTGCGAGGAGTGCAAGGGACAG  
TTTGTGTTCAAGAGTATGCTTATTAAGTTCAGGAGATATCACTGCCTGGACCAAGTGT  
GTTGCTAAAACACAGACTCCCAACAGAAAAGACTGGGTAATCCCAAAGGAGTTCCGGGAA

ATTCCTTACCTGAAGAAATTTAAATGTAAGAAGCAGGACAGGGTGTCCCTCCGGATGCT  
GCAACTGTGAACTCGGCACCTCCTCCCTCTGCATCTGCTCCTTTGTCAGAGACCATGTCT  
GCACCCAGAGACAAACCACTGACCAACATGAAGATCCTGGTTGTTGGGAAGCTGTCAAAG  
AACAAAGGAGGAGGTGAAAGGCATTGTGGAGGACCTGGGAGGAAAGATGACGACAACAGCT  
AACAAAGCCACCCTGTGCATCAGCACCCAGAAGGATGTGGAGAAAATGAGCAAGAAGATG  
GAAGAAGTGAAGGAGGCCAAAGTCCGTGTGGTCTCAGAGGCATTTCTTCAGGATGTGAAA  
TCTTCCAGCAAGGACTTCCAGGATCTGGTGTCTCTCCATGCTCTTTCACCTTGGGGTGCA  
GAGGTGAAAATGGAGCACGAGGAAATGGCTGTGGATGGGAAGATCAGCAAGCCCCCAAGT  
ACAAAGAGCGCTGGGAAGGTCAAAGAAGAACAAGGACCTAGCAAATCTGAAAAGAAAATG  
AAGTTAACAGTGAAGGGTGGAGCAGCAGTAGACCCTGATTCTGGTTTGGAGGATTCTGCT  
CATGTTTTTGA AAAAGGTGGGAAAATTTTCAGTGCAACCCTGGGACTAGTAGATATTGTG  
AAAGGAACAAATTCCTATTATAAACTGCAGCTGCTAGAGGATGACAGAGAGAACAGATAC  
TGGGTGTTCCGATCCTGGGGCCGTGTAGGCACTGTAATTGGCAGTAACAAGCTGGAGCAG  
ATGCCATCAAAGAAGATGCCATTGAACACTTCTGAATTTGTATGAAGAGAAAATGCG  
AATTCTTGGCATTCAAAGAACTTCACTAAATATCCAAAAAATTCTACCCACTGGAAATA  
GATTACGGACAGGATGAAGAAGCTGTCAGGAACTGACAGTAGGTGCCGGGACAAAATCA  
AACTTGCTAAGCCAATCCAAGATCTTATTAAGATGATCTTTGATGTGGAGAGCATGAAG  
AAAGCAATGGTGAATTTGAGATTGACTTGCAGAAGATGCCATTGGGAAAATGAGCAAG  
CGACAGATCCAGAGTGCATATTCCATCCTGAATGAGGTTTCAGCAGGCAGTTTCTGACAGT  
GGTTCAGAATCCCAGATTTTGGACCTCTCCAACCGCTTCTATACACTGATTCTCATGAC  
TTTGGGATGAAGAAACCACCTCTCCTAAATAACTTGAATAACATTGAGGCTAAAGTGCAG  
ATGCTGGACAACCTGCTTGATATTGAGGTTGCTTACAGCCTTCTCAGAGGTGGAAATGAA  
GATGGAGATAAAGACCCAATTGACATCAACTATGAAAACTTAAAACAGATATTAAGGTT  
GTTGACAAAGATTGAGAAGAAGCTAAGATTATCAAACAATATGTGAAGAACACTCACGCT  
GCTACGCACAACGCATATGACCTCAAAGTCGTGGATATCTTCAGGATTGAGCGTGAGGGG  
GAGAGCCAGCGTTACAAGCCCTTCAAGCAGCTCCACAACCGCCAGCTGCTGTGGCACGGC  
TCCCGCACCACCAACTTCGCCGGGATCCTCTCGCAGGGTCTGCGGATAGCTCCGCCTGAA  
GCTCCTGTGACCGGCTACATGTTTCGAAAGGGCATCTATTTGAGACATGGTATCCAAG  
AGTGCAAACACTGTACACATCTCAAGCTGATCCCATAGGTTTAGTACTACTGGGAGAA  
GTTGCCCTTGGAAATATGTATGAACTAAAGAATGCTTCCACATCACAAAATTGCCAAG  
GGAAAACACAGTGTCAAAGGCTTGGGCAAACTGCGCCTGATCCCACAGCCACTACCACC  
CTTGGTGGTGTAGAGGTTCCCTTAGGGAATGGGATCTCCACAGGAATTAATGATACCTGT  
CTTCTGTATAATGAATATATTGTGTATGATGTTGCTCAGGTAATCTGAAGTACCTGTTG  
AAACTGAAATCAACTATAAGACATCACTCTGG

>pig\_PARP1

ATGGCGGAGTCATCGGACAAGCTCTATCGGGTCGAGTATGCTAAGAGTGGGCGCGCCTCC  
TGCAAGAAATGCAGCGAGAGCATCCCCAAGGACTCGCTCCGATGGCCATCATGGTGCAG  
TCGCCATGTTTCGATGGGAAAGTCCCGCACTGGTACCACTTCTCCTGCTTCTGGAAGGTC  
GGCCACGCCATCCGGCACCCCTGACATCGAGGTGGACGGGTTCTCCGAGCTCCGGTGGGAC  
GACCAGCAGAAAGTCAAGAAGACGGCGGAGGCTGGAGGAGTGACAGGCAAAGGCCAAGAT  
GGGGTTGGCAGCAAGGCGGAGAAGACGCTGGGTGACTTCGCGGCCGAGTATGCCAAGTCC  
AACAGAAGCACGTGCAAGGGCTGCATGGAGAAGATCGAGAAGGGCCACGTGCGCCTGTCC  
AAGAAGATGCTGGACCCCGAGAAGCCCCAGCTGGGCATGATCGACCGCTGGTACCACCCA  
AACTGCTTTGTTGAGAACCGGGAGGAGCTGGGCTTCCGGCCCGAGTACAGCGCCAGCCAG

CTTAAGGGCTTCAGCCTGCTCACCGCAGAGGACAAAGAAGCGCTGAAGAAGCAGCTCCCG  
GGCATCAAGAGTGAAGGAAAGAGAAAAGGTGACGAGGTAGATGGAGTGGATGGAGTGGCC  
AAGAAGAAATCTAAAAAGAAAAGGACAAGGAGAGTAAGCTCGAAAAGGCCCTCAAGGCC  
CAGAACGACCTGATCTGGAATATCAAGGACGAGCTAAAGAAAGTGTGTTCAACCAATGAC  
CTGAAAGAGCTGCTCATCTTCAACAAGCAGCAAGTGCCTCCGGGGAGTCGGCGATCTTG  
GACCGAGTGGCCGACGGCATGGTGTTCGGCGCCCTTCTCCCTGTGAGGAATGCTCAGGC  
CAGCTGGTCTTCAAGAGCGATGCCTACTACTGTACTGGGGACGTCCTGCTGGACCAAG  
TGCATGGTCAAGACACAGACGCCTAACCGGAAGGAGTGGGTGACCCCAAAGGAATTCCGA  
GAAATCACTTACCTCAAGAAATTGAAGATCAAAAAACAGGACCGTATATCCCCCCCAG  
GCCAGCACCCCTGTGGCCACAGCACCCCAACCCCGCAGCCTCTGCACCCACCGCCGTG  
AACTCCTCGGCCCCACCAGACAAGCCGTATCCAACATGAAGATCCTGACTCTTGGGAAA  
CTCTCCCGAACAAGGATGAAGTGAAGGCCGCGATCGAGAACTCGGGGGGAAGTTGACA  
GGGACGGCCAGCAAGGCCTCCCTGTGCGTCAGCACCAAGAAGGAGGTGGACAAGATGAGT  
AAGAAGATGGAGGAAGTGAAGAAGCGAATGTCCGAGTGGTGTCCGAGGATTTCTCCAG  
GACGTCTCGGCCTCGACCAAGAGCCTTCAGGAGCTGCTCTGCACCCACATCCTGTCCCC  
TGGGGGGCCGAAATGAAGGCTGAGGTGAAGGCCGAACCTGTGGAAGCCGTGGCCCCAGA  
GGGAAGTCAGGGGTGCACTCCCAAGAAGAGCAAGGGCCCATCAGGGAGGAAGGTGCC  
AACAAATCTGAAAAAGAATGAAATTAACTCTTAAAGGAGGAGCAGCCGTGGACCCCGAT  
TCTGGTCTGGAACACTCGGCCACGTCTGGAGAAAGGCGGGAAGGTCTTCAGTGCCACA  
CTCGGCCTGGTGGATATTGTCAAGGGAACCAACTCTATTATAAGCTGCAGCTCCTGGAG  
GATGACAAGGAGAGCAGGTACTGGATATTCAGGTCTGGGGCCGTGTGGGCACCGTAATT  
GGTAGTAACAACTGGAGCAGATGCCATCCAAGGAGGATGCCATTGATCATTTTATGAAA  
TTATATGAAGAGAAAAGTGGGAATGCCTGGCACTCCAAAAGTTCACAAAGTATCCCAAG  
AAGTTCTACCTCTGGAGATTGACTATGGCCAGGATGAAGAGGCAGTGAAGAAGCTGACA  
GTGAACCCTGGCACCAATCCAAGCTCCCAAATCGGTGCAGGAACTCATCAAGATGATC  
TTTGATGTGGAAAGTATGAAGAAAGCCATGGTGGAGTACGAGATTGACCTTCAGAAGATG  
CCGTTGGGGAAGCTGAGCAAAAGGCAGATCCAGGCCGCTACGCCATCCTCAGTGAGGTC  
CAGCAGGCCGTGTCCAGGGCAGCAGGACTCCAGATCCTGGATCTCTCAAATCGATT  
TACACCTTGATCCCCATGACTTTGGGATGAAGAAGCCTCCACTGCTGAACAATGCGGAC  
AGCGTGCAGGCCAAGGTGGAAATGCTAGACAACCTATTGGACATCGAGGTGGCTACAGT  
CTGCTCAGGGGTGTTCTGATGACAGCAGCAAGGACCCATTGATGTCAACTATGAGAAG  
CTCAAACTGATATTAAGGTGGTGGACAGGATTCTGAAGAAGCCGAGACCATCAGGAAG  
TACGTTAAGAACAACCTACGCAACCACACAATGCATATGACTTGAAGTTATCGATATC  
TTTAAGATCGAGCGTGAAGGGGAGAGTCAGCGTTACAAGCCATTTAAACAGCTGCATAAC  
CGGAGTTGCTGTGGCACGGGTCCAGGACCACCAACTTCGCCGGGATCTTGTCCCAGGGT  
CTCCGGATAGCCCCACCTGAAGCACCTGTGACGGGCTACATGTTTGGGAAGGGGATCTAT  
TTCGCCGACATGGTCTCCAAGAGTGCCAACACTGCCACACGTCCAGGGAGACCCATA  
GGCTTGATCCTGTTGGGAGAAGTTGCCCTTGGAAACATGTATGAGCTGAAGCACGCTTCG  
CACATCAGCAAGTTACCAAGGGCAAGCACAGTGTCAAAGGCTTAGGCCAAAACGACCCCT  
GACCCCGCAGCCAGTATTACTATGGATGGTGTGGAGGTTCTCTTGGGACCGGGATCCCA  
TCTGGTGTGAACGATACTGTCTGTGATAACGAGTACATTGTCTACGATATCGCTCAG  
GTCAATCTCAAGTATCTACTGAAGCTGAAATTAACCTTTAAGACGTCCCTGTGG

>Taiwan\_habu\_PARP1

ATGGCCGAGCCCGCGGAGAAGCTTTACCGGGCCGAGTACGCCAAGAGCGGGCGGGCTTCC

TGCAAGAAATGCAAGGAAAACATCGCCAAGGACTCGCTCCGCCTCGCCATCATGGTGCAG  
TCCCCTATGTTTGTATGGCAAAGTACCTCACTGGCACCCTATTCTTGTCTGGAAACGA  
ACTCAGCTGCTGTCCCATGCTGATCTGGATGGCTTCTCAGAACTGCGTTGGGAAGACCAG  
GAAAAAATTAACAAACACATAGAAAGTGGAGGAGCTGCAGCAGGCAAAGGTGGCCAAGAG  
GGAGGTGGCAAACGTGAAAAAAGTTTAAATGATTTGCAGCAGAATATGCAAAGTCCAAT  
AGAAGTACTTGCAAAGATTGTGAACGAAAGATAGAAAAGGTCAGATCAGAATCTCAAAG  
AAAATGGTGCTCGCTGAAAAGCCACAGCTGGGGATGATAGACAATTGGTACCATCTTGAC  
TGTTTTAGTAGCCGCAGAACAAATCTGGGTTTTCTCCTACTTTTAAATGCCTCTCAGATC  
CAGGGCTTTGAGCTCCTAAAGGCAGAAGACAAAGAAATTCTAAAGAAGCAGCTACCATCT  
GTCAAGAATGAAGGAAAGAGAAAAGGGAGATGAGGTGGATGCAAATGTGATCTCAAAAAAG  
AGACCCAAGAAAGAGAAAGAAAAATTATTGAAACAAGAAAAGCTGTAAAGGATCAGACA  
GAACTGATTTGGAATATCAAAGATGAGTTGAAGAGATCCTGTTCTACCAATGACTTAAAG  
GAGCTCCTGATAGCCAACAAGCAAGAAGTTCCTTCTGGGGAACTGCTATCTTGACCGT  
GTTGCAGATGGGATGGCTTTTGGAGCTCTGCTTCCCTGTGAAGAGTGCAAAGGGCAATTT  
GTGTTCAAGAGCAATACGTATTACTGCACAGGGGATATCACAGCTTGGACCAAATGTGTT  
TCCAAGACACAAACCCAGCAGGAAAGAATGGACAATCCCAAAGGAATTCCGGGAGATC  
CCTTACCTAAAGAAATTCAAATTTAAAAAGCAAACAGAGCATTCTTGCCAGAGGCTGCT  
TCTACAAATTCTGTACCTCCTCAGCAGTTTCTGATCCTATTACAGAGAATTTCGGCTGCA  
CCGGCAGATAAACCATTAACAACATGACGGTATTAGTCGTTGGAAAATTGTCAAAGACC  
AAGGATGAAATTAATCTGTTGTTGAAGAAGTCCGGGGAAAGGTGACAGCGACTGTGAAT  
AAAGCTGACTTGTGCATCAGCTCTCAAAGGAAGTTGACAAAATGAACAAAAAATGGAA  
GAAGTAAAGAAAGCCCACTTGTGTGTGGTGTGCGGAGAACTCCTCCAGGATATAAAAAGC  
TCCAGCAAGGGTTTTAGGAGCTTCACTTTCATGCGGTGTCTCCCTGGGGTGCAGAA  
GTAAAGCAGGAACACAAAAAGTGTCTGTGAGTGGAAAATCCAGCGGACACCCAAACGTG  
AAAAATTCTGGGAAGAACAAGGAAGAGCAAGGAACAAGTAAATCTGAGAAGAAAATGAAG  
TTAACAGTTAAAGGAGGGGCTGCTGTGACCCCTGATTGAGGTCTGGAAGATTCTGCGCAT  
GTTTTTGA AAAAAGTGGTAAAATCTTCACTGCCACTTTAGGTCTAGTTGATATTGTCAA  
GGAACAAATTCTTATTACAACTTCAGCTGCTGGAGGATGACCGAGAGACCAGGTAAGTGG  
GTTTTTCGCTCATGGGGTCGTGTTGGAACATCAATTGGAAGTAACAACTAGAGAAGATG  
CCTTCTAAAGAAGAAGCCATTGAACATTTCTAGATCTATATGAAGAGAAAACAGGCAAT  
TCCTGGCATTCCAAAAATTTACCAAATATCCAAAAAATTTTACCCTTTGGAGATAGAC  
TATGGGCAGGATGAAGAAGCGGTCAAGAACTGACAGTGAGTGCAGGAACCAAGTCAAAG  
CTTCTAAGGCTGTCCAAGATCTTATTAAGATGATTTTTGATGTAGAAAAGTATGAAGAAA  
GCCATGGTGGAGTTTGGAGATTGATCTCCAGAAGATGCCTTTGGGGAAGTTAAGTGAAGAG  
CAGATCCAGAGCGCTACTCCATTCTGAATGAAGTGCAGCAGGCAGTTTCTGATGGTGGC  
ACAGATCCCAGATATTGGATCTCTCAATCGCTTCTACACTCTAATCCCCATGACTTT  
GGGATGAAGAAGCCTCCACTTCTAAACAACCTTGACTACATTAAGACTAAAGTGGAAATG  
CTGGATAATCTGCTTGACATAGAGGTCGCTTATAGCCTTCTAAGAAGTGGCGGTCAGGAT  
GGGGATAAGGATCCAATAGATGTGAACTATGAGAAGCTCAAACCATTATCCAGGTAGTA  
GATAAAGATTGAGAAGAAGCCAAGATTATAAACAATATGTTAAGAACAATCATGCAAGT  
ACCCACAATGCATATGATTTGAAAGTTGCGGAGATTTTCAAGATTGAACGTGAAGGGGAA  
TATCAACGTTATGAACCATTCCGAGACCTACATAATCGCCAATTGCTCTGGCATGGTTCT  
CGCACTACCAATTTTGGTGGTATCTTGTACAGGGTCTCCGAATAGCTCCACCTGAAGCC  
CCAGTGAAGTGGCTATATGTTTGGCAAAGGTATCTACTTCGAGACATGGTGTCCAAAAGT

GCAAATATTGTCATACCTCTCAAATTGATCCTGTTGGCCTAATCTTGCTGGGAGAAGTT  
GCTCTTGAAACATGTATGAATTGAAAAATGCTTCCCATATAACAAAGCTACCAAAAGGC  
AAACACAGTGTCAAAGGTTTGGGTAAAACAGCCCCAGATCCCTCAGCCACTGTTTCTCTT  
GAAGGTGCAGATGTTCTTTAGGAAAAGGAATTGCATCTGGAATTAGCAGTACTTCTCTT  
ATGTATAATGAATACATTGTCTATGATATTGCTCAGGTAAAACCTGAAGTATCTGCTGAAA  
TTAAAGTTCAACTATAAGACAACCTCTCTGG

>Gharial\_PARP1

ATGGCGGAGCCAGCGGACAAGCTGTACCGAGCCGAGTACGCCAAGAGCGGGCGGGCCTCG  
TGCAAGAAATGCGGAGAGAGCATCGCCAAGGACTCGCTGCGCCTGGCCATCATGGTGCAG  
TCACCCATGTTTGTATGGCAAAGTCCCTCACTGGCATCATTACACTTGCTTTTGAAGCGG  
GCTCGGATCACGTCTCATGCGGATATTGATGGCTTCCCTGAGCTGCGATGGGAAGATCAG  
GAGAAAATAAAAAAACCAATTGAAGCGGGGGACCTGCCACAGGTAAAGGTGGTGACCAG  
GAAGGAGGTGGCAAGGCTGATAAAAGCTTACATGACTTTGCAGTAGAATATGCCAAGTCT  
AACAGAAGTACCTGCAAAGGCTGTGAACTGAAAATAGAAAAGAGTCAGATCAGAATTTCT  
AAGAAGATGGTGCATCCGAAAAGCCCCAGCTGGGAATGATAGATAACTGGTACCATCCA  
GACTGCTTTGTGAGCCGCCGAGCAGAGCTGGGCTTTCTTCTGCATTTGGTGCCAGTCAG  
CTCCAGGGCTTTGGCATTTTGGTAGCTGAGGATAAAGAATCTCTGAAGAAGCAGCTGCCT  
GCCGTCAAGAGTGAAGGAAAAAGAAAAGCAGATGAGGTGGATGGGACTGTGACTACAAAA  
AAGAAACAAAAAAGAAAAGGATAAAGAATCCAAACAGGAGAAGCTGCTGAAGGAACAG  
ACAGAATTGATTTGGAACATCAAAGATGAACTGAGGAAAGCCTGCTCCACCAATGACCTG  
AAAGAGCTGCTGATAGCCAACAACAGGAAGTGCCTTCCGGGGAGTCTGCTATCTTGGAC  
AGAGTGGCAGATGGGATGGCATTGGAGCTCTGCTTCCCTGTGAAGAGTGCAAGGGGCAG  
TTCATGTTCAAGAGTGATGCGTATTACTGTTCAAGGAGACATTACTGCCTGGACTAAATGT  
GTTGCCAAAACACAGTCTCCCAACAGGAAAGAATGGGTTATCCCAAAGGAATCCGGGAA  
ATCCCTTACCTAAAGAAATTCAAGTGTAAGAAAGCAGGACAGAGTATTCCCTCCAGAGGCT  
GCTGTTGTGAACACTGTGCTTCCATCTGCAGCTTCTGCTCCTTTGACAGAGGAGGCATCT  
GCACCCACAGATAAGCCATTATCCAACATGAAGATTTTGATACTTGAAAAATTATCCAGG  
AACAAAGAAGAAATGAAGACCACAGTTGAGGAGCTTGAGGAAAAGTGACAGGAACTGCC  
AATAAGGCCAACCTGTGTATCAGCACACAAAAGGAAGTTGAGAAAATGAACAAGAAGATG  
GAAGAAGTGAAAGAGGCAAAGTCCGAGTGGTTTCAGAAGAGTTTCTCAAGGATGTGAAA  
TCCTCTAGCAAAGGCTTTCCGGAACTGCTGTCCGTACATGGGCTCTCATCTGGGGTGCA  
GAGGTGAAGCAGGAGAACATGGAGACAACCTGTGGGAGGAAAAGTCCAGTGGACCCCAAAT  
ATGAAGAGTGCTGGAAAAGTCAAGGAAGAACAAGGGACCTGCAAGTCTGAAAAGAAAATG  
AAATTGACAGTTAAAGGAGGAGCAGCCGTAGATCCTGATTCTGGTTTGGAGGACTCTGCT  
CACGTCTTTGAAAAAGGTGGTAAAATCTACAGCGCCACTCTTGGCTTGGTGGATATTGTC  
AAAGGAACCAATTCCTATTACAAGCTGCAGCTGCTAGAGGATGACCGAGAAATCAGGTAC  
TGGGTGTTTAGGTCATGGGGTCGCGTTGGCACTGTGATTGGGAGTAACAAGCTGGAGCAG  
ATGCCATCTAAAGAAGATGCCATTGAGCACTTTTTGAATCTTTATGAAGAGAAAACGGGC  
AATTCCTGGCATTCAAAGAACTTACGAAATATCCAAAGAAATTCACCCGCTAGAAATA  
GATTATGGACAGGATGAAGAAGCTGTGAAGAACTGACAGTAGGTGCCGGCACAAAGTCA  
AAGCTTCTAAATCAGTCCAGGACCTTATCAAGATGATCTTTGATGTGGAGAGCATGAAG  
AAAGCCATGGTGAATTTGAGATTGACCTCCAGAAGATGCCATTGGGAAAGCTGAGCAAG  
AGACAGATCCAGAGTGCATATTCCATCCTTAATGATGTTCCAGCAGGCAGTTTCTGGTGGC  
GGCACTGATTCTCAGATACTGGATCTCTCAATCGTTTCTACACATTGATACCTCATGAC

TTCGGGATGAAGAAGCCACCTCTTTTAAATAACCTAGAATATATTCAGGCCAAAAGTGCAG  
ATGTTGGACAACCTGCTTGATATTGAGGTTGCTTACAGCCTTCTCAGAGGTGGAAACGAG  
GATGGGGATAAAGACCCAATTGATGTCAACTATGAAAAGCTCAAACTGAAATTAAGGTG  
GTTGATAAAGATTGAGAAGAAGCCAAGATCATAAAGCAATATGTGAAGAATACCCATGCT  
GCTACCCACAATGCATATGATCTGAAAAGTTGTGGATATCTCAAGATTGAGCGCGAAGGG  
GAGAGTCAGCGTTACAAGCCATTCAGACAGCTTACAATCGCCAGCTGCTCTGGCATGGC  
TCACGTACTACCAACTTTGCTGGTATTCTCTCGCAAGGTCTCCGAATAGCTCCACCTGAA  
GCTCTGTGACTGGCTACATGTTTCGGAAAAGGTGTCTATTTTGAGACATGGTTTCCAAG  
AGCGCCAACACTGTGCACACATCTCAGGCTGATCCAGTAGGCTTAATCTTATTGGGAGAG  
GTTGCCCTTGAAAATATGTATGAGCTAAAGAATGCTTCTCACATAACTAAGTTGCCGAAG  
GGGAAACATAGCGTCAAAGTTTGGGCAAACTGCACCTGATCCACAGCCACCATCAGT  
TATGAGGGTGTAGAAGTTTCTTTGGGAATGGAATGTCAACAGGAATTAATGATACTTGT  
CTTCTGTATAATGAATACATTGTCTACGATGTTGCTCAGGTAAACCTGAAGTACTTGCTG  
AAACTGAAATCAACTACAAGACATCACTCTGG

>tropical\_clawed\_frog\_PARP1

ATGGCCGAGGCCTCGGAGAACTTTATCGGGCTGAGTACGCCAAGAGCGGCCGCGCCTCC  
TGTAAGAAATGCGGAGACAACATCGCCAAGGAGTCCCTGCGGCTTGCCCTCATGGTGCAG  
TCCCAATGTTGATGGCAAAGTGCCACACTGGCACCCTACTCTGTTTCTGGAAACGC  
GCCCCGGTCTTATCCCATGGGGATATCGATGGTTTCACTGAGCTCCGATGGGACGATCAG  
GAAAAAATCAAGAAAGCCGTTGAAACCGGAGGGGCTTCTGCAGGGCCGGAGGGGATGCC  
AAGGGAGGCAAAGGGGAGATGACGCTGAATGATTTTGAGTAGAATATGCAAAGTCTAAC  
AGAAGCACCTGCAAAGGCTGTGAGAAGAAAATAGAAAAGGGGCAGATCAGAATATCCAAG  
AAGATGGTGGATGTGGAGCGGCCCCAGCTGGGAATGATCGACCGGTGGTATCACTCAGAC  
TGCTTTGTGAGCTGCAGGGAGGAGCTGGGCTTTCTCCCTCCTACAGCGCCAGCCAGCTC  
AAGGCTTTCTCATTCTAAAAGCTGAGGACAAAGATGCCCTGAAGGCAATGCTTCCCGCT  
GTAAAGAATGAAGGGAAGAGGAAGGCAGATGAGGTGGATGCAAGTTCCGCTGGAACCAAA  
AAGAAATTAAGAAAGAGAAGGAAAAAGAGTCAAAGCTGAAAAAGTTGTAAGGAGCAG  
ACAGAGCTTATTGGCACATTAAGGATGAGCTGAAAAAAGTTTGAGCACCAACGATTTG  
AAGGAGCTTCTCATCGCCAACAAACAGCAAGTGCCGTCCGGTGAGACCAACATTTGGAC  
CGGGTATCAGATGGCATGGCATTGGAGCACTGCTTCCGTGCGAGGAGTGCAGCGGGCAG  
TTTGTTCAGAGCGACGCTTATTATTGACCCGGGACCTCAGCGCCTGGACAAAATGT  
GTTGCTAAAACACAGACTCCCAACAGAAAGGATTGGGTGACACCTAAGGAGTTCCATGAA  
GTCCCTTATTGAAGAAATTAAGTTCAAAGACAAGACAGAGCTTCCCGCCTGTGTC  
GCTCCAACACCTATCAGCCCCCGGCTGCCCTAAACCAGCGCCGACTGTGGAGGAAACT  
GTTCTGAAGGGAAACCTTTAACCAATGCAAAGGTGCTTGTATTGGGAAGCTGTCCAAA  
AACAAGGATGAGGTAAAGGCGTTGATTGAAGGACTGGGCGGCAAAGTCACCGGCTCTGCA  
CACAAGGCCACGCTGTGCATCAGCACTAAAAAGGAAGTTGAGAAGATGAGTAAGAAGATG  
GAGGATGTGAAAGCAGCCAATGTGCGTGTAGTAAGTGACGACTTCTGAAGGAAGTGAG  
TCGGGGAAGAGCGTGCAGGAATTGTTGTCCAATACGAATATCCTCATGGGGTGCTGAG  
GTCAAGCAAGAGGCCGTGCAGCCAACGGAGAAGCAGCCGTCCAGCGCCCCCGGCTGGG  
AAGAGTTCGGGCAAAGTGAAAAGAAGAGAAGGGAGCAACAAGTCTGAAAAGAAAATGAAA  
TTAACTGTTAAAGGGGAGCAGCCATTGACCCGATTCTGGGCTGGAAGATTCATGTCAC  
GTCTTGAAAAAGGAGGGAAGATTTTAGTGCAACTCTGGGCTGGTGGATATAACCAGA  
GGGACAAATCTTATTATAAGCTGCAACTTATAGAGCACGACAGAAATCCAGGTACTGG

GTGTTCCGATCCTGGGGTCGAGTGGGCACTGTAATAGGCAGTAACAAGCTAGAAGAGATG  
TCTTCCAAGGAAGATGCCATTGACCATTTCTCAACCTGTATCAGGAGAAAACCGGCAAT  
GCATGGCACTCCCCAATTTACCAAATATCCCAACAAGTTCTATCCTCTGGAAATAGAC  
TATGGGCAGGAAGAAGATGTGGTGAAGAACTCTCGGTTGGGGCCGGCACAATAATCCAAG  
CTTGCCCAGCCTGTCCAGGAACTGATCAAGTTAATATTTGATGTGGAGAGCATGAAGAAG  
GCCATGGTGGAGTTTGAGATCGATCTCCAGAAGATGCCTTTGGGGAAGCTCAGCAAGCGG  
CAGATTCAGAGTGCATACTCAATACTCAATCAAGTGCAGCAGGCCGTCTCGGAATCCTCA  
AGCGAAGCTCGGTTATTGGATCTCTCCAATCAGTTTTACACACTCATACTCATGATTTT  
GGAATGAAGAAGCCCCGCTGCTAAATAATCTAGAGTACATACAGGCTAAAGTGCAGATG  
CTGGATAATCTGCTTGACATTGAAGTTGCATACAGCCTGTTGAGAGGCGGCGCCGATGAT  
GGAGAAAAAGATCCATTGATGTGAAATATGAAAAGATTAAGACTGACATTAAGGTTGTC  
GATAAAGAATCGGAAGAATCTAGAATAATACGTGACTATGTGAAGAACACGCACGCCGAG  
ACGCACAATGCCTACGATCTTGAGGTCCTCGAGATATTCAAATCGAGCGTGAAGGTGAA  
TATCAGCGGTATAAGCCATTCAAACAGCTACACAACCGCCAGCTGCTTTGGCACGGATCC  
CGAACCACAAATTTTGAGGGATATTGTCTCAGGGTCTCCGAATTGCTCCACCGGAAGCT  
CCCCTTACTGGCTATATGTTTGGCAAAGGTATCTATTTGCCGATATGGTATCCAAAAGT  
GCAAATATTGTAATGCAATGCCGGTAATCCATTGGGCTGATCTTACTGGGAGAGGTG  
GCCCTTGGTAACATGCATGAGCTGAGAGCAGCATCACACATTACGAAACTACCCAAGGGC  
AAACACAGTGTCAAAGGTTTGGGTCGAACCGCGCCTGATCCCTCAGCTACTGTAAAAGT  
GATGGAGTGGACGTTCTCTTGGGAAAGGAAGTGTACAAATATCACTGACGCCAGTCTG  
TTATATAACGAATACATTGTGTATGATGTTGCTCAGGTTAACCTGAAGTACCTGCTGAAG  
CTGAAGTTCAACTACAAAGACAAAGGAGGGTTGCTTTGG

>African\_clawed\_frog\_PARP1

ATGGCCGAGGCTCCGACAACTTTACCGGGCTGAGTACGCTAAGAGCGGTGCGCCTCT  
TGCAAGAAATGCGGCGACAACATCGCCAAGGAGTCTCTGCGTCTCGCCATCATGGTGCAG  
TCCCAATGTTTCGATGGCAAAGTTCGCACTGGCATTCACTACTCGTGTCTTCTGGAAGCGT  
GCCCGAGTCTTATCCCAAGGGGATATTTATGTTACACAGAGCTCCGATGGGAAGATCAG  
GAAATGATTAAGAAAGCCATTGAAACTGGAGGGGCTGCTGCAGGAGCTGGAGGAGATTCC  
AAGGGGGGCAAAGGGGAGATGACTCTGAATGATTTTGCAGCCGAATATGCAAAGTCAAAC  
AGAAGCGCCTGCAAAGGCTGTGAGCAGAAAATAGAAAAGGGGCGAGATCAGAATATCCAAA  
AAGAGTGTGGATGTGGAGCGGCCCCAGCTGGGGATGATTGATCGGTGGTACCACCCAGAC  
TGCTTTGTGAGCAGCAGAGAGGAACTGGGCTTTCTCCCTCCTACAGCGCCAGCCAGCTT  
AAGGGCTTACCATCTAAGTGCAGAAGACAAAGACTCCTTAAAGAAAAAGCTTCCAGCT  
GTAAAGAATGAAGGGAAGAGGAAGGCAGATGAAGTGGACGGACATTCCGCTGCAACCAAA  
AAGAAAATAAAGAAAGAGAAGGAGAAAGAGTCAAAGCTGGAAAAGCTGCTAAAGGAGCAA  
ACGGAGCTGATTTGGCATATTAAGGATGAACTGAAAAAGTTTGCAGCACCAATGATTTG  
AAGGAGCTTCTCATAGCCAACAAACAGCAGGTGCCGTCCGGTGAGACCAACATTGTGGAC  
CGGGTATCGGATGGCATGGCATTGGAGCGCTGCTTCCATGCGAGGAATGCAGTGGGCAA  
TTTGTTCCTAAGGGCGACGCTTATTATTGCACTGGGGACCTCAGTGCCTGGACAAAATGT  
GTTGCTAAAACACAAACTCCCAACAGAAAGGATTGGGTGACACCAAAAGGAGTTCCATGAA  
ATTCCTTATTTGAAGAAATTAAGTTCAAAGACATGACCGAGCTTTCCCTCATGTGCT  
GCTCCTACACCTATCAGCCCACCAGCTGCCCTGAACCGAAACCGACTGTGGAGGAAACT  
TTTCCTGAAGGGAAACCTTTAACCAATACGAAGGTTCTTCTTATTGGAAAGCTGTCAAAA  
AACAAAGATGAAGTAAAGACGTTGATTGAGGGACTGGGCGGCAAGGTCGCTGGTTCTGCA



CACAAGGCCAATCTGTGCATCAGCACTAACAAGGAAGTTGAGAAGATGAGTAAAAAGATG  
GAGGAAGTGAAAGCAGCCAATGTGCGTGTAGTAAGTGACGACTTCCTAAAGGAAGTGGAG  
TCGGGGAAGAGCGTGCAGGAATTGTTATCCCAGTTTGGAAATATCTTCATGGGGGGCTGAA  
ATCAAGCAGGAGGCTGTGCAGCCAACAGAAAAGCAGCCCTCCAGTGGGCCCGTGGCTGGG  
AAGAGTTCGGGCAAAGTAAAAGAAGAGAAAAGGGAGCAACAAGTCTGAGAAGAAAATGAAA  
TTGACTGTAAAGGGGGAGCAGCCATTGACCCTGATTCTGAGCTGGAAGATTCATGTCAT  
GTCTTGAAACGGGAGGAAAGATTTTCAGTGCAACTCTGGGACTGGTGGATATAACCAGA  
GGGACAACTCCTATTATAAGCTGCAACTTATAGAGCACGACAGATTCCAGGTACTGG  
GTGTTCCGATCCTGGGGTCGGGTGGGCACAGTAATAGGCAGTAAAAAGCTAGAAGAGATG  
TCTCCAAGGAAGATGCCATTGAACATTTCTCAACCTGTATCAGGACAAAAGTGGCAAT  
GCATGGCACTCGCCCAATTTACCAAATACCCCAAAAATTCTATCCCCTGGAAATAGAC  
TATGGACAGGAAGAAGATGTGGTGAAGAAGCTCTCAGTGGGGGCCGGCACAAAATCCAAG  
CTCGCTAAGCCTGTCCAGGAAGTATCAATTAATTTTTGATGTGGAGAGCATGAAAAG  
GCCATGGTGGAGTTTGGAGATCGATCTCCAGAAGATGCCTTTGGGGAAACTCAGCAAGCGG  
CAGATTCAGAGTGCCTACTCTATTCTTAGCCAAGTGCAGCAGGCCGTGTCTGAATCCTTA  
AGCGAAGCCCGATTACTGGATCTCCAATCAGTTTTACACACTCATACTCATGATTTT  
GGAATGAAGAAGCCCCCGCTGCTAAATAACCTAGAGTACATACAGGCTAAAGTGCAGATG  
CTGGATAATCTGCTCGACATTGAAGTTGCTTACAGCCTGTTGAGAGGTGGCGCCGATGAT  
GGTGAAGGATCCCATTGATGTGAAATATGAAAAGATTAAGACTGACATTAAGGTTGTT  
GCTAAAGATTGAGAAGAATCCAGAATTATATGCGATTATGTCAAGAACACGCACGCAGAT  
ACGCACAATGCATATGATCTTGAGTCTCGAGATATTCAAATCGACCGTGAAGGTGAA  
TATCAGCGGTATAAACCATTTAAACAGCTACACAACCGCCAGCTGCTTTGGCACGGCTCC  
CGCACCACAAATTTGCGAGGAATATTGTCTCAGGGTCTCCGAATTGCTCCGCCAGAAGCT  
CCTGTTACCGGGTATATGTTTGGCAAAGGTATCTATTTGCCGACATGGTATCCAAAAGT  
GCAAACTACTGTCATGCAATGCCGGGTAGCCCATAGGGCTGATCTTACTGGGGGAGGTG  
GCCCTCGAAACATGCATGAGCTGAAAGCAGCATCACAAATTACAAAAGTCCCAAGGGC  
AAACACAGTGTAAGGGTTTGGGTAGAAGTGCACCAGATCCCTCAGCTACTGTACAGCTG  
GATGGAGTGGATGTTCTCTCGGAAAAGGAACTTCTGCAAATATCAGTGACACCAGCCTG  
TTGTATAATGAATATATTGTGTATGATATTGCTCAGGTCAACCTGAAGTACCTGCTGAAG  
CTCAAGTTCAACTACAAAGGAGGGATGATGTGG

>Tibetan\_frog\_PARP1

ATGGCCGAGTCCGCCGACAAGCTCTACCGGGCCGAATACGCCAAGAGCGGCCGCGCCTCC  
TGCAAGAAGTGCGGCGACAACATCGCCAAGGAGTCGCTGCGGCTGGCCATTATGGTGCAG  
TCGCCTATGTTTGTGGGAAAGTACCACACTGGCACCATTATTCCTGTTTCTGGAAGCGT  
GCTCGGGTCATATCCCACGGGGATATTGATGGCTTACAGAGCTTCGATGGGAGGATCAG  
GAAAAGATTAAGAAGGCCATCGAAACTGGTGGTGCCTCAGCAGGAGGGGACGCCAAAGGA  
GGCAAAGCAGACATGACTGAATGATTTGCGAGCTGAATATGCAAAGTCCAACAGAAGC  
ACATGCAAAGGCTGTGAGCAGAAAATTGAGAAGGGTACAGATAAGATTGTCTAAGAAAAGC  
TTGGATGTGGAGCGACCTCAGCTTGGCATGATCGATCGCTGGTACCACCCAGACTGCTTT  
GTAAGCCGCCGGAAGAGCTTGGCTTCTATCAATGTACAGTGCCAGCCAGATGAAGGGC  
TTTAGCATTCTGAAAGCTGAAGACAAGGAGGCTCTGAAAGCCAAGCTCCAGCAGTGAAG  
AATGAGGGGAAGAGAAAAGCGGATGAGATTGATGGATCTGCTGCGTCCAAAAAGAACTA  
AAAAAGAGAAGGAAAAGGAATCCAACTTGAGAAGCTGCTGAAGGAACAGACAGAGCTC  
ATCTGGAGTATAAAGATGAACTGAAGAAAGTTTGCAGCACCAACGACCTGAAAGAGCTG

CTTATAGCCAACAAACAGCAGGTGCCTTCCGGAGAAACCAATATCCTGGACAGAGTATCA  
GACGGCATGGCTTTTGGGGCTCTCCTTCCTTGGCAGGAATGTCAGGGACAGTTAGTGTT  
AAGACTGATGCTTATTACTGTACAGGGGACATCAGTGCCTGGACCAAATGTGTTGTCTTA  
TATTATCTATTTTTGCTATGTTTTTTTTCTTGTTTTTCATGCATGTGTTAATCCAGGAG  
TTCCATGAAGTTCCATATTTGAAAAAGTTCAAGTTTAAGAGGCAGGACAGAGCGTTCCT  
CCAGCTGTAGCTCCAGCACCGGCTACCGCTCCAGTTGCCACTAAGCCTGTGATTAAAGAG  
GAAGCAGTTCCTGATGGTAAGCCACTGACCAATATGACCGTTATGACCATTGGCAAAGT  
TCGAAGAACAAAGATGAAGTTAAAGCGATGGTTGAAGAAGTGGTGGAAAGACGACTGGG  
TCCGTCAGCAAACACAGTATGCGTCAGCACTCAAAGGAGGTGGAGAAGATGAGTAAG  
AAAATGGAGGATCTAAAAGCGCCAATATTCGAGTGGTCAGCGAGGACTTCTGAATGAG  
CTGCAGTCTGGCAAGAGCTTACAGGACCTGCTTACCCAGCATGGCATCTCTGCTTGGGGT  
GCAGAAATAAACAGGAGGCACAACAGGAGCCCCAGGCTAAAACAAAGTCCGGGAAGAGT  
ACTGGCAAAGTGAAAGAGGAGCAGGGTAACAAATCTGAGAAAAAATGAAGTTGACTGTT  
AAAGGTGGAGCAGCTGTTGATCCAGACTCTGGGCTTGAATAATCAGGTCATGTGTTGGAG  
AAAAGCAGCCAGATCTTCAGCGCCACCCTGGGCCTGGTAGATATATCTCGAGGGACAAAC  
TCCTACTATAAACTGCAGCTGATCGAACATGACAGAGATGCCAGGTAAGTCTTCCGG  
TCCTGGGGCCGAGTCGGAACAGTTATAGGCAGTAACAACTGGAGGAAATGTCTTCAA  
GAGGAAGCCATTGACCATTTCCTTAACCTGTATCAAGAGAAGACTGGCAATGCCTGGCAC  
TCCACCAACTTACCAAATATCCCAATAAGTTCTACCCACTGGAAATAGACTACGGCCAG  
GAAGAGGATGTGGTGAAGAAGCTTTCAGCTGGAGCGGGAACAAAGTCCAAACTTGCAAAG  
CCAATACAAGAAGTCAATAAATGATATTTGATGTGGAGAGCATGAAAAAGCCATGGTG  
GAGTTTGAGATTGATCTACAGAAGATGCCTCTAGGCAAACCTAGTAAGCGACAGATTCAG  
AGTGCATACTCTATCCTGAATGAGGTACAGCAGGCTGTATCTGATAGCTCTCCTGAAGT  
CGCTTGCTGGATCTGTCCAATCGCTTCTACACGTTAATACCTCATGATTTTGAATGAAG  
AAGCCCCGTCTCTTGGATAACGTAGAATACATCCAGGCAAAGGTGCAGATGCTGGATAAT  
CTGCTAGATATAGAGGTCGTTACAGTCTTCTGAGGGGTGGTACAGAAGATTCAGAGAAG  
GATCCCATTGATGTCAAGTATGAGAAGATTAAGACTGTTATTAACGTTGTAGATAAGGAC  
TCTGAAGAAGCCAAGATAATCCATCAATATGTTAAGAACACACATGCGGATACACACAAT  
GCCTATGATCTTGAGATCCTTGATATCTCAAGATTGAGAGAGAAGGGGAGAAACAGAGG  
TATAAGCCATTCAAACAGCTAAACAACCGTCAGCTGCTCTGGCACGGATCCCGAACACAA  
AACTTTGCTGGAATCTGTCTCAAGGTCTGCGGATTGCCCTCCTGAAGCACCTGTTACC  
GGATACATGTTCCGTAAGGCGTCTATTTGCGGACATGGTGTCTAAAAGTGCAAACCTAC  
TGTCACACAACGCCGAGTAACCCACAGGTTTGTCTCTACTGGGAGAAGTCGCTCTCGGA  
AACATGTGTGAGTTGAAAGCTGCTTCTACATAACAAAATTACCTAAGGGTAAACATAGT  
GTGAAAGGTTTGGCAGAAGTGCACCTGATCCTGCTGCTACTGTACAACCTTGATGGAGTG  
GACGTTCTCTGGGGAAAGGCGTTAATACCAACATTAGTGACACCGGTCTACTGTATAAT  
GAATATATTGTGATGACATTGCCAGGTGAACCTGAAGTACCTCTGAAGCTCAAGTTC  
AACTACAAAGGCGGACTCATGTGG

>southern\_platyfish\_PARP1

GTTGTTGACAAGACCACGCAGGAGGCTGAGATCATAATGCAATACGTTAAGAACCCAC  
GCGGCTACACACAACACCTACACCCTGGAAGTGCAAGACATCTTCAAAGTTGCACGAGAA  
GGAGAGCACCAACGCTACCGTCCATTGAGGAGCTACACAATCGACAGCTACTGTGGCAC  
GGCTCTCGCGCCACAACTATGCTGGTATTATGTCTCAGGGTCTTCGCATTGCACCTCCA  
GAGGCCCCAGTGACTGGTTACATGTTCCGCAAAGGTGTGTACTTTGCTGACATGGTGTC

AAGAGTGCAAACACTGTACACCTCTCAGTCAGACCCTGTGGGACTCATTCTGCTGGCA  
GAGGTCGCTCTAGGCAACATGCATGAACTGAAGAAAGCCTCTCACATTACAAAATTACCA  
AAGGGAAAGCACAGTGTAAAGGTTTGGGTAGAACCGCTCCTGATCCAAATGCTTCTACC  
ACTTTGAATGGGGTGCAAGTGCCTCTGGGAAAAGGAGTCAATACTAACATTGATGACACA  
AGTCTACTGTACAACGAGTACATTGTATATGATGTGGCTCAGATAAACTTGAAGTATCTC  
CTGAAGATCAGGTTTAACTACCAGACATCTCTGTGG

>Cod\_PARP2

ATGTTCAAATTAACCCCGCCACCAAGTACAAAAGAAAATACGCTCTCAGATGGTGAAA  
TCAGAGGTGGTAAAGACCGTGATCATGAAGGGGAAGGCTCCAGTGGACTCTGAGTGTAAG  
GCCAAGCTGGGCAAGGCCCATGTTTACAGTGAAGGGGAGGACGTCTATGACGTCATGCTA  
AATCAGACAAACCTGCAGTTCAACAACAACAAGTACTACCTGCTCCAGCTGCTAGAAGAC  
GACAGCTCCAAGAGCTATAGCGTGTGGCTGAGATGGGGCAGAGTTGGTAAATCGGGCCAG  
AGCAGCTTGACAGCCTGCGGAGGAGACCTGAACAAGGCCAAAGACTTCTTCAAGAAAAA  
TTGAGGAAAAGACAAAGAATAACTGGGAACACCGGCTTAACTTTGAGAAAGTCCCTGGA  
AAATATGACATGGTGTTCATGGACTACAGTACCTCTTCAAAGGAGGAGCCCACGCTGGAG  
GTGGACGCCGCGCCCAAGAAGTGGACCTCAAGCTGGATGAGAAGGTCCAGTCCCTGCTG  
GAGCTCATCTGTGACATCAAGGCCATGGAGGAGTGTGTGCTGGAGATGAAGTTTGACACT  
CGCAAAGCCCCCTGGGCAAGCTGACGTGCGAGCAGATCCGAGCGGGCTACGCCGCCCTG  
AAGCGGATCGAAGAGTGCCTGAAGAAGAAGGACAGCCGCAAAGACCTGTTGGAGGCCTGC  
AACCAGTTTACTACTCGCATCCCCACGACTTTGGGCTGAAGACACCCCCCATGATCAGC  
TCTGAGGACGACCTGAAGGAAAAGATAGCTCTGTTGGAGGCCCTCAGTGACATCCAGATC  
GCCGTGAAGATGGTCCAGGCCAGTGCCAACGCGGAGGAGCATCCCCTGGACCGCCAGTAC  
CACTCCCTCCAGTGCCAGCTGCAGCCCCTGGACGCCGCGAGCGACGCATACCAGTACCTG  
CAGAGCACCCACGCCCCACCCACAGCGAGTACACCATGAGCGTCTTGACATCTTCTCC  
GTGGACCGCCAGGGCGAGTCGGAGAAGTTCCTCTCCGGGATGCACAACAAGACTCTGCTG  
TGGCACGGATCCCGTCTGTCCAACACTACGTGGGCATCCTGAGTCAGGGGCTCCGCGTGGCC  
CCCCCGAGGCCCCCGTACCAGGATACATGTTCCGGTAAAGGGATCTACTTCGCCGACATG  
TCGTGAAGAGCGCAACTACTGTTCAACCAACCAGCGCAACAACATAGGCCTGCTGCTG  
CTGGTGGCGCTGGGGGACTGCAACGAGCTCCTGGACGCAGACTACGAGGCGCAGAAACTC  
CCCAGGGCAAACACAGCACCAAGGGCATGGGCCAGACCGGCCCGGACCCCAAGAACGCC  
GTCACCCTGGACGGCTTCTCGGTGCCATTGGCCCGCGGTGAAGACGGGTGTGGGCCGG  
GCGGGTCTACTCCCTCCTTACAACGAGTTCATCGTGTACAACCCCGCCAGGTCCGC  
ATGCGCTACCTGCTCAGAGTCCAGTTCAACTACCCCTCCCTGTGG

>African\_clawed\_frog\_PARP2

ATGTCGGGGCGCAGTGCGAATGTCCAAGGGTGGGTGAGAAAGACCCGGTTCCTCAGAAG  
AGAAAAGCAGATTCTGATCCAGAACCAGAACTTGTGGTGAAAATAGAACCAGAAGAGGAG  
AATAATGTTGCTACAGATGTTTGTAAATGGAGAGGCAAACACTAATATAAAAAGAGAGCTA  
AACTATTGCTGGGAATGGGAAGGAGATGGTGGCATTGGATCCCATTTTCCCTGAGCTC  
AACACGCAGATTAATTTGTCATTAGTACAGGGAAACGATCTGTGACGGTCTCACCAGCT  
GCAGGGGTGTCTCTACAGGTGGATGTACAGAAAATGGTTCAGAAAAACACACAGAGTGGG  
TTCCAGAGATCGGTCCGACTGGCAGTGAAGATCGTGACAAATATTTTGTGTGGCAGTGG  
TGGTCTGATGAGGGGGCTTGGATTCATATGATGCTTGCACATGTGTAGCTCTGGAGGAA  
GGTTTTCAATCAGAAGCTAAGGTGGTGCCTGTAAGCTTGGGAGGTGTCATACATCATA  
GATCTAGAAGCGATGGTGCAAAAAGAAATAGCCAAACCAATATGAAAGACAGATTCAACGC

AGCTTATCTGTTCTAACAGTGCTCCTCAGCAAAAAGAGCATCATTAGTGCACCTGCAAAG  
AGAGCCCGTGGAAGCAACAGTGTAAGAAATGTAGAAAATGAATCAGAGGAGAATAAAGAA  
CAGGTTAGGACTCTGATAATGAAAGGTAAAGCTCCAGTAGATCCTGAATGCTCCATAAAG  
CTTGGGAAGGCTCATGTTTTCTGTGAGGGAGATGATGTGTATGATGTCATGTTGAACCAG  
ACCAACCTTCAGTTCAATAACAATAAGTACTACCTTATCCAATTGCTGGAAGATGATGGT  
GTGAAAAATTTCTGTGTTGGATGCGTTGGGGAAGAGTTGGCAAAGTTGGACAGCACTCT  
CTGGTATCCTGTGGAAGCGATCTACAAAAATCAAAGACATTTTCAAAAAAAGTTTTAT  
GAGAAGACTAAAACTTATGGACTGAACGAGCACAGTTTGAAAAATGTGCTGGAAAAATAT  
GATATGCTGCAGATGGACTATAATGCAACCGAGGAGGAAAAAGAGACAACAGTGAAGGAA  
GAGAGCATGGCTGACGTTCCCAAACCGAATCCCAATTGGATGACAGTATCCAGGAGTTA  
ATTGAGCTGATTTGTAATTTAAAGCCATGGAGGAACTGTACTTGAGATGAAATTCGAC  
ACAAAGAAAGCTCCCCTAGGGAAACTGACAGTCGAACAGATCCGTGCTGGCTACTGCTCT  
CTGCAGCAAATTGAAAAGTGTATTAAGAAACAAAAGTTTGGCAGAGATCTCCTTGAGGCA  
TGCAATGAGTTTTACCCCGCATTCCCATGATTTTGGGCTACGAACACCTCCTCTTATT  
AGGACGCTAGAAGACCTGACAGTAAAAGTTCCGGCTACTAGAGGCATTGGGTGATATTCAG  
ATTGCAGTGAAGTTGGCAAGCCTGGAGCTCAGCTCTCTGGAACACCCCTTCGACAGACAG  
TATCGGCAGTTAAATTGTTCTATGCAGCCCTTGACCAAACATCCAGCACCTTCCAGCTT  
ATTGAGGGCTATCTGCAAAGCACCCATGCACCTACACACAATGATTATACCATGACACTC  
CTGCGGGTCTTTGAGTTACAAAGAGTGGGAGAAGAGTGCAACTTCAGAGAAGACCTTCCT  
AACAGGATGCTGCTGTGGCATGGATCTCGGCTAACTAACTGGGTTGGGATCCTTAGCCAG  
GGATTAAGGGTGGCCCTCCAGAGGCTCCAGTAACTGGCTATATGTTTGGAAAAGGAATA  
TATTTTGTGACGTCTCGTCAAAAAGTGCAAATTAAGTCTCTCATCCCGGGACAAAAT  
GTGGGGGTTCTCCTACTGTCTGAGGTGGCTCTTGGTGAATGCAATGAGCTTCTTGCTGCA  
GATTGTGATGCCAAAAGAAGATAAAGTCAAAGCACAGTACAAAAGGATTGGGAAGGAGC  
ATCCAGACCCCAAAAAGAGCATAATTCATGAAGGAGCAGTGGTTCCATTGGGTCCACTA  
ATGGACTGGACTGACAAATGACGGCGGCTACACATTAAATTACAACGAGTACATTGTT  
TATGATCCTCATCAGGTTCCGATGAAGTATCTGCTACAGGTCGGCTTAACTACAGTTCC  
TTATGG

>American\_alligator\_PARP2

ATGGGCCGCAAGCGGGCAGCGCCAGAGGCGGGCGACGCGGACCCGGAGCTGCGCTGGGAG  
TGGCAGGATGCTGCGGGCACTTGGCACCAGTACTCCCCGGAGCAGAGCAGGGTGCTCACG  
CAGGCGGCCAGGGCAGGGAAGCCAGCGTGGAGGTCGGGGCCTGCGTGGACCTGAGAAGG  
ATGGTGCAAAGGACACGCGGACGGGGCAGGACAGACCCGTGGCAGCTGCGGTCCGGGAC  
CAGGACTCCTACTTCATCTGGCAGTGGCAGGGCGATGGGGAGGAGGACTGGCTCCCCTAC  
CCTGCTGACACCTGCTTAGCTCTGGAGCGGGTGCATGTGGGAAGGGGGGGCCAACCTTG  
CAGATGACTGTTGGCCGACCCGCTACACGCTGGACCCAGCCAGATGATCCAGACCAAC  
TCGAGAACCAGGTATCAACGCAAGATGGACCGCAGGGAGTCAAGTGCAGTAGTTGATAGT  
AAGGAATCTCAAGCGAGCAAACTCCAGCTCCACAGCCCTCAAGAGGCTCAAGCACTG  
AAGAGGTCCCGGAGTAGGGGGTCCCTCCTAGACCCAGTGGCTAAAGAAGTCGGTGGGGGA  
GAGGGCAAAGAGGCTGTTAAGACCTAGTAATGAAGGGGAAAGCACCAGTGGATCCCGAG  
TGCTCTGCTAAGCTTGGGAAGGCTCATGTGTAAGTGTGAGGGGGACGATGTCTACGATGTG  
ATGCTGAACCAGACGAACCTCCAGTTCAACAACAACAATTCTACATCATCCAGCTCCTG  
GAGGATGATGGGCAGCGGAGCTACAGTGTCTGGATGCGGTGGGGGCGCGTGGGGCGTCCA  
GCCAGCACACGCTGGTATCCTGTGCTGGGGATCTTGCCAAAGCCAAGGATGTCTTACC

AAGAAGTTTCTGGATAAGACCAAGAACAGCTGGCCCAGTCGGGGCAGCTTCCAGAAGGTG  
CCAGGCAAATACGACCTGCTGCATATGGACTACCAGGCCCATGGTCCAGATGAGGAAAGC  
CGCCCTGAGAAAGTCATGCCCAACTCAAACCAGCTCCCGGCTTGAGCCCCGCGTGCAA  
GCACTGGTGGAGCTCATCTGTGACATCCAGACCATGGAGGAGATGGTGATGGAGATGAAG  
TATGACACCAAGAAGGCCCCATTGGGGAAGCTGACGGCCGAGCAGATCCGGGCTGGGTAC  
TGCTCGCTGCAGAAGGTGGAGGCGTGTCTGCAAGAGGGAAGCGCTGGCCAGGCCCTGCTG  
GACGCCTGCAATGAATTCTACACCCGCATCCCGCACGACTTCGGGCTGCGAACACCCCA  
ATGATCCGGACAAAGCAGGAGCTGCAGGAAAAGATGCAGTTGCTGGAGGCCCTGGGCGAG  
ATTGAAATCGCTATCAAACCTGGTGCCTCAGAGAGGCAGGACCACGAGCACCCGCTGGAC  
CAGCACTACCGCAGACTGGGCTGCGAGTTGTGTGCCCTGGACAGGGACACCCACGATTTT  
CAGGTGCTGGAGCAGTACCTGCTGACCACCCATGACCCACCCACCGCGACTACTCCATG  
GAACTGCTGGAGGCCTTTGCCCTGCGCCGCCGTCTGAGGAGACGGCTTTCCGTGCTGAC  
CTTCCAACAGGGTGTGCTGTGGCACGGCTCCCGGCTGGGCAACTGGATGGGCATCCTG  
AGCCAGGGGCTGCGGATCGACCCCCGAGGCTCCTGTGACTGGCTATATGTTGGGAGA  
GGCATCTACTTTGCTGACATGCTCTCAAGAGTGCCAACTACTGCTTTGCTTCCCGTCAG  
AAGGATGTGGGGCTCCTGCTGCTATCAGAGGTGGCCTTGGGTGAGTGCAACGAGCTGTTG  
GAGGCTAACGCTGATGCCAGAAGCTCTTGAACGGGAAGCACAGCACCAAGGGGATGGGG  
AAGATGGCTCCTGCTAACCGCACCAAGCTGGATGGCACCGTGGTCCCGCTAGGACCACCT  
GTGGAGACCGGAGTGGTGAACCCCATGGCTACACCCTGAACTACAATGAATTCATCATC  
TATGACCCATGCCAGGTGCGCATGCGCTACCTGCTCAAGGTGCGCTTCAACTTCACGCAA  
CTGTGG

>armadillo\_PARP2

ATGGCTACTCGGCGGAGGAGAGCTGTCAGCAACCGCGCGCCAGCTTCTGGACCATTAAT  
GAAACTGAGGAAGTTAATGTTGGGACCACAGCTGCAGAAGATCCTCCTCCTGCCAGAAAA  
AATCGCAGATGCCAGAGGCAGAGGTTGAAAAATGAGCCTGCGGCTGGAATGAAGGCTGAT  
AGTAATGACAAGATAGAAGGCAAGCAAGAATCTGTGAAGACATTGCTTTTAAAAGGCAA  
GTTCTGTGGACCCAGAGTGCACAGTCAAGGTGGGAAAGGCCCATGTGTACTGTGAAGGG  
AGTGATGTCTATGATGTCATGCTAAATCAGACTAATCTCCAGTTCAACAACAATAAGTAC  
TATTTGATTAGCTATTAGAAGACGATGCCAGAGGAACTTCAGTGTGGATGAGATGG  
GGTCGAGTTGAAAAACGGGGCAGCACAGCTTGGCAGCTTGTTCAGGGGACCTTAACAAG  
GCCAAGGAAATCTTTCAGAAGAAATTCCTTGATAAACGAAAAACAATTGGGAGGATCGT  
GAGAAGTTTAAGAAGGTGCCTGGAAAATATGATATGCTACAGATGGACTATAACCAAG  
ACTCAGGGTAAAGAGGAAACCAACAAGAGGATTCTCTTAAATCCTTTTTGAAACAGAG  
TCACGACTAGATCTTCGGGTACAAGAGCTGATAAAGTTGATTTGTAATGTCCAGGCCATG  
GAAGAGATGGTGGTAGAAATGAAGTATGATCTCAAGAAAGCCCCACTTGGGAAGCTGACA  
GTGGCGCAAATCAAGGCAGGTTACCAGTCTCTTAAGAAGATTGAGGATTGTATTCCGGCT  
GGCCGGCATGGACGAGCTCTCATGGAAGCATGCAATGAATTCTATACCAGGATCCACAT  
GACTTTGGACTCCATGTCCCTCCATTAATCCGAACAGAGAAAGAACTGTCAGACAAAGTG  
CAGCTGCTAGAGGCACTGGGAGACATTGAAATTGCCATTAAGCTGGTGACAACAGAAGTG  
CAAAGCTCAGAACACCCCTTTGGACCAACACTATAGAAATCTACATTGTGCCTTGACCCCT  
CTAGACCATGCAAGTCATGAGTTCAAAGTGATTTACAGTACCTACAGTCTACCCATGCT  
CCCACTACAATGACTATAACCATGACCTTGCTGGATGTTTTTGAAGTAGAGAAGGAGGGT  
GAGAAAGAAGCCTTCAGAGAGGACCTTCATAACAGGATGCTGCTATGGCATGGTTCCAGG  
CTGAGTAACTGGGTGGGAATCCTGAGCCATGGACTTCGAATTGCCCCACCTGAGGCCCC

ATAACAGGCTACATGTTTGGAAAAGGAATCTACTTTGCTGACATGTCTTCCAAGAGTGCT  
AATTACTGCTTTGCCTCTCACTTAAAGAATACTGGACTGCTGCTTTTATCAGAGGTGGCT  
CTAGGTCAAGTGAATGAACTACTAGAGGCCAATCCTGAGGCAGAAGGATTACTTCAGGGC  
AAACACAGCACCAAGGGGCTGGGCAAGATGGCTCCAGCTCTGCCTGTTTCATCACCTG  
AATGGGAGTACAGTGCCCTTAGGACCAGCAAGTGACACAGGAGTTCTGAATCCGGAGGGT  
TACACCCTCAACTACAATGAATTTATTGTCTACAACCCCAACCAAGTCCGCATGCGATAT  
CTTCTAAAGGTTCAATTTAATTTCTGCAATTGTGG

>Chinese\_alligator\_PARP2

ATGGGCCGCAAGCGGGCGGCGCCGGAGGCGGGCGACGCGGACCCGGAGCTGCGCTGGGAG  
TGCCAGGATGCTGCGGGCACTTGGCACCAGTACTCCCCGGAGCAGAGCAGGGTGTCTCAGC  
CAGGCAGCCAGGGCAGGGAAGCCCAGCACGGAGGTCGGGGCTGCGTGGACCTGAGAAGG  
ATGGTGCAAAACGACACGCAGACGGGGCAGGACAGACCCGTGGCAGCTGCCGTCCGGGAC  
CAGGACTCTACTTTCATCTGGCAGTGGCAGGGCGATGGGGAGGAGGACTGGCTCCCCTAC  
CCTGTTGACACCTGCTTAGCTCTGGAGCGGGTGCAGCTGGGGAGGGGGGGCCAACTTG  
CAGATGACTGTTGGCCGGACCCGCTACACGCTGGACCCAGCCCAGATGACCCAGACCAAC  
TCGAGAACCAGGTATCAACGCAAGATGGACCGCAGGGAGTCAGATGCAGTGGTTGATAGT  
AAGGAATCTCAAGCGAGCTACACTCCAGCTCCACAGCCCTCCAAGAGGCTCAAGCACTG  
AAGAGGTCCCGGAGTGGGGGGTCCCTCCAGACCTAGTAGCTAAAGAAGTCAGTGGGGGA  
GAGGGCAAAGAGGCTGTTAAGACCCTAGTAATGAAGGGGAAAGCACCAGTGGATCCCGAG  
TGCTCTGCTAAGCTTGGGAAGGCTCATGTGTACTGTGAGGGGGACGATGTCTATGATGTG  
ATGCTGAACCAGACGAACCTCCAGTTCAACAACAACAAGTTCTACATCATCCAGCTCCTG  
CAGGATGATGGGCAGCGGAGCTACAGTGTCTGGATGCGGTGGGGGCGCGTGGGGCGTCCA  
GGCCAGCACACGCTGGTATCCTGTGCTGGGGATCTTGCCAAAGCCAAGGATGTCTTCACC  
AAGAAGTTTCTGGATAAGACCAAGAAGAGCTGGCCCAGTCGGGGCAGCTTCCAGAAGGTG  
CCAGGCAAATACGACCTGCTGCATATGGACTACCAGGCCACGGTCCAGATGAGGAAAGC  
CGCCCTGAAAAGTCATGCCCAACTCAAACCAGCCTCCCGACTTGACCCCGTGTGCAA  
GCACTGGTGGAGCTCATCTGTGACATCCAGACCATGGAGGAGATGGTGATGGAGATGAAG  
TATGACACCAAGAAGGCCCATTTGGGGAAGCTGACGGCCGAGCAGATCCGGGCTGGATAC  
CTCTCGCTGCAGAAGGTGGAGGCGTGTCTGCAAGAGGGAAGCGCTGGCCAGGCCCTGCTG  
GACGCCTGCAATGAATTTTACACCCGCATCCCGCACGACTTTGGGCTGCGAACACCCCA  
ATGATCCGGACAAAGCAGGAGCTGCAGGAAAAGATGCAGCTGCTGGAGGCCTTGGGGCAG  
ATTGAAATCGCTATCAAACCTGGTGCCTCAGAGAGGCAGGACCACGAGCACCCGCTGGAC  
CAGCACTACCGCAGACTGGGCTGCGAGTTGTGTGCCCTGGACAGGGACACCCACGATTT  
CAGGTGCTGGAGCAGTACCTGCTGACCACCATGCACCCACCCACCGGACTACTCCATG  
GAGCTGCTGGAGGCCTTTGCCCTGCGCCGCCCTGCTGAGGAGACGGCTTTCCGTGCTGAC  
CTTCCCAACAGGGTGTGCTGTGGCACGGCTCCCGGCTGGGCAACTGGATGGGCATCCTG  
AGCCAGGGGCTGCGATCGCACCCCGGAGGCTCCTGTGACTGGCTATATGTTCCGGGAGA  
GGCATCTACTTTGCTGACATGCTCTCAAGAGTGCCAACTACTGCTTTGCTTCCCGTACG  
AAGGATGTGGGGCTCCTGCTGCTGTCAGAGGTGGCCTTGGGTGAGTGCAACGAGCTGTTG  
GAGGCTAATGCTGATGCCAGAAGCTCTTGAACGGGAAGCACAGCACCAAGGGGATGGGG  
AAGATGGCTCCTGCTAACCGCACCAAGCTGGATGGCACCGTGGTCCCGCTAGGACCACCT  
GTGGAGACCGGAGTGGTGAACCCCATGGCTACACCCTGAACTACAATGAATTCATCATC  
TATGACCCATGTCAGGTGCGCATGCGCTACCTGCTCAAGGTGCGCTTCAACTTCACGCAA  
CTGTGG

>Dog\_PARP2

ATGGCGGCGCGTCGGCAGGGGACACGCGGGCGCAGCGGGGCGAGAGCATTGACAAAAGCT  
GGAAGAGTTCATAATGGCAACACGGCTGGAGAAGACCCTCCTCCTGCAAAGAAAACCTCGG  
AGATGCCAGAGGCAGGGGGTAAAAGGGGGCCTTTGACTGCAGGAGGGGCCGTAATGGC  
AGCACGGAAGACAAGCCAGCAGAGTCTGTGAAGACCCTGCTGTAAAAGGCAGAGCTCCC  
GTGGACCCCGAGTGCAGCAAGGTGGGGAAGGCCACGTGTACTGTGAAGGGAGCGAT  
GTCTATGATGTCATGCTAAACCAGACCAATCTTCAGTTCAACAACAATAAGTACTATTTG  
ATTCAGCTGTTGGAAGATGATGCCAGAGGCACTTCAGTGTCTGGATGAGATGGGGCCGA  
GTTGGGAAAATGGGGCAGCACAGCTTGGTGGCTTGCTCGGGGGACCTCAACAAAGCCAAG  
GAAATCTTCCAGAAGAAATTCCTTGACAAAACAAAAACAATTGGGAGGATCGTGAGAAG  
TTTGAGAAGGTGCCTGGAAAATATGATATGCTAGAAATGGACTATGCTACCAATACTCAG  
AGTGAAGAGGAAACAAAAAAGGAGTCTCTTAAACTCCCCTTCAAACCAGAATCACAGCTA  
GATCTTCGAGTGCAGGAGCTGATAGAGTTGATCTGTAATGTCCAGGCCATGGAAGAGACG  
ATGGTAGAAATGAAATACGACACCAAGAAAAGCCCACTTGGGAAGCTGACAGTGGCACAA  
ATCAAGGCAGGCTACCAGTCTCTCAAGAAGATTGAGGACTGTATTCGGGCTGGCCAGCAT  
GGACGAGCTCTTGGAAGCTTGCAATGAATTCTACACCAGGATCCCACATGACTTTGGG  
CTCCGCACCCCTCCTTTAATCCGGACAGAGAAAGAGCTGTCAGACAAAGTACAGCTACTG  
GAGGCTTTAGGAGACATTGAAATCGCCATTAAGCTGGTGAAGACCGCGCTGCAAAGCCCA  
GAACACCCACTGGACCAACACTATAGAAAACACTACTGTGCCTTGCATCCTCTAGACCAT  
GAAAGTCACGAGTTCAAAGTGATTTCCAGTACCTACAGTCTACTCATGCTCCACACAC  
AAGGACTACCCATGACCTTGCTGGACGTTTTTGAAGTGGAGAAGGAGGGTAAAAAGAA  
GCCTTCAGAGAGGACCTTCATAACAGGATGCTGCTGTGGCACGGCTCCAGGCTTAGTAAT  
TGGGTGGGAATCCTGAGCCACGGCCTTCGAATTGCCCCCCTGAAGCTCCCGTCACAGGT  
TACATGTTTGGAAAGGAATCTACTTTGCTGACATGTCTTCTAAGAGCGCCAATTAAGTGC  
TTCCGTTCTCGCGTGAAGGACATTGGGCTGCTGCTTCTATCAGAGGTCGCTCTGGGTCAG  
TGTAATGAGCTGCTAGAGGCCAATCCTGAGGCGGAAAAGATTACTTCAGGGCAAACACAGC  
ACCAAGGGACTGGCAAGACGGCTCCAGTCCCGCCTCCTTCATCACCTGAATGGGAGT  
ACGTTTCTTTAGGACCAGCAAGTGACACAGGAATTCTGAATCCAGATGGTTATACTCTC  
AACTACAATGAATTTATTGTCTATAGCCCCAACCAAGTCCGTATGCGGTACCTTCTGAAG  
GTTGATTTAATTTCTGCAGCTGTGG

>Cow\_PARP2

ATGGCAGCTCGGCGGCGGGGACTGCGGGGGGCGAGCGCGAGCTATTCTGAATGAAGCT  
GAAAGAGTTAATAATGGCAAAACAGTTGCAGAAGACCCTCCTCCTGCAAAGAAAATTCGA  
AAATGTCACAGGCTGAAAAGGAGCCTGTGGCTGAAGGAAAGACAGATAGTGACAGGACT  
GAAGACAAGCAAGATACACCAAGGAGAATGTGGACCAGCAAGAGGGTCCCTGAGTCTGTG  
AAGACCTTGCTGTTAAAGGGCAAAGCTCCAGTGGACCCAGAGTGCACAACCAAGGTGGGG  
AAGGCCCATGTGACTTTGAAGGAAATGATGTCTATGATGTCATGCTAAATCAGACCAAT  
CTCCAGTTCAACAACAACAAGTATTACCTGATTGAGCTGTTAGAAGATGATGCCAGAGA  
AACTTCAGTGTGGATGAGATGGGGCCGAGTTGGGAAGACAGGGCAGCACAGCTTGGTG  
GCTTGTTCCGGGGACCTCAACAAGGCCAAGGAAATCTTTCAAAGAAATTCCTTGACAAA  
ACAAAAATAATTGGGAGGATCGTGAGAAGTTTGAGAAGGTGCCTGGAAAATATGATATG  
CTACAAATGGACTATGCCAGCAATACACAGAATGAAGAGGAAACAAGAAAGAGGAATCT  
CTTAAATCCCCTTGAAACTAGAGTACAGCTAGATCTTCGTGTACAGGAGCTGATAAAG  
TTGATCTGTAATGTCCAGGCCATGGAAGAAATGATGGTAGAAATGAAATATGATACCAAG

AAAGCTCCACTTGGGAAGCTGACAGTAGCACAATCAAGGCAGGTTACCAGTCTCTTAAG  
AAGATTGAGGATTGTATTGCGGCTGGCCAGCATGGACGAGCTCTCATGGAAGCATGCAAT  
GAATTCTACACCAGAATCCCACATGACTTTGGACTCCGTACCCCTCCATTAATCCGGACA  
GAGAAAGAACTGTCAGATAAAGTACAATACTGGAGGCTTTGGGAGACATTGAAATTGCA  
ATTAAGCTGGTGAAGACAGAAGTCAAAGCCCGGAACACCCATTGGACCAACAGTATAGA  
AAACTACGGTGTGCCTTGACCCTTTACACCATGAGAGTTATGAGTTCAAAGTGATTTC  
CAGTACCTACAGTCTACCCATGCTCCACACACAGTGACTATAACCATGACCTTGCTGGAT  
GTCTTTGAAGTTGAGAAGGAGGGTGAAAAAGAAGCCTTCAGAGAGGACCTTCATAACAGG  
ATGCTACTCTGGCATGGCTCCAGGCTGAGTAACTGGGTAGGAATCCTAAGCCATGGGCTT  
CGAATCGCCCCACCTGAGGCTCCCATCACAGGTTACATGTTGCGAAAAGGAATCTATTTT  
GCTGACATGTCTTCAAGAGTGCCAATTACTGCTTTGCCACTCGCCTAAAGGATACTGGG  
CTGCTGCTCTTATCAGAGGTAGCTCTGGGTCAGTGAATGAGCTGCTCGGGCCAATCCA  
GAGGCAGAGGGATTACTTCAAGGCAAACACAGCACCAAGGGGCTGGGCAAGATGGCTCCC  
AGTCTGCGTGCGCCATCACCTTGAATGGGAGTACAGTGCCATTAGGACCAGCAAGTGAC  
ACAGGAATTCTGAATCCGGAGGGCTATACCCTCAACTACAATGAATTTATCGTCTATAAC  
CCTAACCAGTCCGTATGCGATACCTTCTAAAGGTTCAAGTTAATTTCTGCAGCTGTGG  
>Dolphin\_PARP2

ATGGCAGCTCGGCGGCGGCGGGGACAGGCGGCGAGCCGGGCGGAGCACTGAATGAAGCT  
GAAAGAGTTAATAATGGCAAACAGCTACAGAAGACCCTCCACCTGCAAAGAAAATTCGA  
AAATGCCAGAAGATGAAAAGGAGCCTGTGGCTGGAGGAAAGGCTGATAATGACAGGACG  
GAAAAAAGCAAGGTCAGTCTCTGGACATACATAGGCCAGGGAGCTCCTGGGCCAGCGGG  
GTCTCTGAGTCTGTAAAGACCTTGCTGTTAAAGGGCAAAGCTCCAGTGGACCCAGAGTGC  
ACAGCCAAGGTGGGGAAGGCCATGTATACTGTGAAGGAAATGATATCTATGATGTCATG  
CTAATCAGACCAATCTCCAGTTCAACAACAACAAGTATTATCTGATCCAGCTGTTAGAA  
GATGATGCACAGAGGAACCTTCTGTGTTTGGATGAGATGGGGCCGAGTTGGAAAATGGGG  
CAGCACAGCTTGGTGGCTTGTCTGGGGACCTCAACAAGGCCAAGGAAATCTTTCAAAG  
AAATTCCTTGACAAAAAATAATTGGGAGGATCGTGAGAAGTTTGAGAAGGTGCCT  
GGAAAATATGATATGCTACAAATGGACTATACCACCAATACTCAGAGTGAAGAGGAAACA  
AATAAAGGTGAATCTCTCAAATCCCAGTTGAAACCAGAGTCACAGCTAGATCTTCGTGTA  
CAGGAGCTGATAAAGTTGATCTGTAATGTCCAGGCCATGGAAGAGATGATGGTAGAAATG  
AAATATGATACCAAGAAAGCCCCACTTGGGAAGCTGACAGTGGCACAATCAAGGCAGGT  
TACCAGTCTCTTAAGAAGATTGAGGATTGTATTGCGGCTGGCCAGCATGGACGAGCTCTC  
ATGGAAGCATGCAATGAATTCTACACCAGAATACCACATGACTTTGGCCGTACCCCTCCA  
TTAATCCGGACAGAGAAAGAGTTGTCAGACAAAGTACAGCTACTAGAGGCTTTGGGAGAC  
ATTGAAATTGCCATTAACCTGGTGAGGACAGAAGTGCAGAGCCCAGAACACCCACTGGAC  
CAACACTATAGAAAATACATTGTGCTTTGCACCCTTTAGACCATGAGAGTTATGAGTTC  
AAAGTGATTTCCAGTACCTGCAGTCTACGCATGCTCCACACACAGTGACTATAACCATG  
ACCTTGCTGGATGTATTTGAAGTAGAGAAGGAGGGTGAGAAAGAAGCCTTCAGAGAGGAC  
CTTCATAACAGGATGCTGCTATGGCATGGTCCAGGCTGAGTAACTGGGTGGGAATCCTG  
AGCCACGGGCTTCAATCGCCCCACCTGAGGCTCCCATCACAGGTTACATGTTTGGAAAA  
GGAATCTACTTTGCTGACATGTCTTCAAAGAGTGCCAATTACTGCTTTGCCACTCGCCTA  
AAGGATACTGGACTGCTGCTCTGTGAGAGGTAGCTCTAGGTCAGTGAATGAGCTACTA  
GGGGCCAATCCAGAGGCAGAAGGATTACTTCAAGGGCAAACACAGCACCAAGGGGCTAGGC  
AAGATGGCTCCCAGTCTACGTGCGCCATCACCTTGAATGGGAGTACAGTGCCCTTAGGA



CCAGCAAGTGACACAGGAATTCTGAATCCAGAGGGTTATACCCTCAACTACAACGAATTT  
ATTGTCTATAACCCCAACCAGGTCCATATGCGATACCTTCTAAAGGTTGATTAAATTC  
CTGCAGCTGTGG

>Elephant\_PARP2

ATGGCGGCTCGGCGGCGGGGACGGTCCGCGGCCGCGCGAGCATTAAATGAACTAAG  
AGAGTTAATAATGGCAACACAGCTACAGAAGACTCCCCTCCTGCAAAGAAAACCTGAAGA  
TGCCATAATCAGGGGGTAAAAAGGAACCTGTGGCTGAAGGCAAGGCTGAAAATTATGAC  
AAGACAGAAGACAAGCAAGAATCTGTGAAGACTTTACTGTAAAAAGCAAAGCTCCTGTA  
GACCCAGAGTGCACAGTCAAAGTGGGGAAGGCCATGTATATTGTGAAGGGAATGATGTC  
TACGATGTTATGTTGAATCAGACCAATCTCCAGTTCAACAACAACAAGTACTATCTGATT  
CAGTTGTTAGAAGATGATGCCAGAGAACTTCAGTGTGGATGAGATGGGGCCGAGTT  
GGGAAAACAGGGCAGCACAGCTTGGTGGCTTGTTCAGGGGACCTACCAAGGCCAAGGAA  
ATCTTTCAGAAAAAATTCCTTGACAAAACGAAAAATAATTGGGAGGATCGTGAAAAGTTT  
GAGAAGGTACTGGAAAATATGATATGCTACAGATGGACTACGCTACCAACACACAGGGT  
GAAGAGGAAACAAAAGAAGAGGAATCTCTTAAATCCCCCTTGAAACCAGAGTCGAAGCTA  
GATCTTCGGGTACAAGAGCTGATAAAGCTGATTTGTAATGTCCAGGCCATGGAAGAGATG  
ATGTTGAGATGAAGTATGACACCAAGAAAGCCCCACTTGAAAGCTGACAGTAGCACAA  
ATCAAGGCAGGTTACCAGTCTCTTAAGAAGATTGAGGATTGTATTGCGGGCTGGCCGGCTC  
GGACGAGCTCTCACGGAAGCATGCAACGAATTCTATAACCAGAATCCCACATGACTTTGGA  
CTCCGTACCCCTCCACTAATCCGAACAGAGAAAGAAGTGTGCGAAAAAGTCCAACATTA  
GAGGCATTGGGAGACATTGAAATTGCCATTAAGCTGGTGAACAGAGCTGCAAAGCCCA  
GAACACCCATTGGACCAACACTATAGAAACCTACATTGTGCCTTGCGCCCTTAGACCAT  
GCGAGTTATGAGTTCAAGGTGATTTCCAGTATCTACAGTCTACCCATGCTCCCACACAC  
ACTGACTACACCATGACCCTGCTGGATGTTTTGAAGTAGAGAAGGAGGGTGAGAAAGCA  
GCCTTCAGGGAGGACCTTCCTAACAGGATGCTGCTCTGGCATGGCTCCAGGCTGAGTAAC  
TGGGTAGGAATCCTGAGCCATGGGCTTCGAATTGCCCCAGCTGAGGCTCCCATCACAGGT  
TACATGTTTGAAAAGGAATCTACTTTGCCGACATGTCTTCCAAGAGTGCCAATTAAGTGC  
TTTGCCTCCCGCTAAAGGACACAGGACTGCTGCTTATCAGAGGTAGCTCTGGGTCAG  
TGTAATGAGCTACTGGGGCCAATCCTGAGGCAGAAGGATTACTTCAGGGCAAACACAGC  
ACCAAGGGGCTGGGCAAGATGGCTCCAGTCTTACACTTCATCACCCCTGAATGGAAGT  
ACAGTGCCCTTAGGACCAGCTGGTGACACCGGAGTTCTGAATCCAGAGGGTTATACCCTC  
AACTACAACGAATTCATCGTCTATAACCCCAACCAGGTCCGTATGCGATACCTTCTGAAG  
GTTCAATTAATTCCTGCAGCTCTGG

>tropical\_clawed\_frog\_PARP2

ATGTCAGGGCGCAGCGGAAAGGTCCAAGGGCGGGCGAGAAAGACCCGGGTTTCCCAGAAG  
AGAAAAGCAGAGTCTGATCCAGAGCCAGACTTTGTGGTGAATAAGAACCCGGATGAGGAG  
AATAATGTTGCTGCAGATGTTTGTGATGGAGAGGCAAGGACCAGTATGAAAACAGAGCTA  
GACTCCCCTGGGAATGGGAAGGAGATGGTGGCATTGGATTCTTTTTCCCTGAGCTC  
AGCACTCAGATTAATTTGGCATTAGTTCAGGGAAACGATTTGTGACAGTCTCACCAGCT  
GCAGGGGTGTCGATAAAGGTAGATATGCAGAAAATGGTTCAGAAAAACACACAGACTGGG  
TACCAGAGATTTGTCCGACTGGCAGTTCAAGATTGTGACAAATATTTGTGTGGCAGTGG  
TGGTCTGATGAGGGAGACTGGATTCCTATGATGCTTGACGTGTGTGGCTCTGGAGGCT  
GGATTTCAATCAGAAGCTAAGATGGTGTCTGTAAGCTTGGGGGGTCCGCATACATCATC  
GATTTAGAAACAATGGTGCAAAAAACAGTCAAACCTGAACATGAAAGACAGATTCAACGC

TGTTTATCTGGTCCTAGTAGTGCTCCTCAGCAAAAGAGCACCATTAGTGCACCTGCAAAG  
AGATCCCGTGGGAAGCAAGAGTGTTATAAATGTAGAAGATGAATCAGAGGAGAATAAAGAA  
CAGGTTAGGACTCTGGTAATGAAAGGCAAAGCTCCAGTAGATCCAGAATGCTCCACGAAG  
CTGGGGAGGGCTCATGTGTTCTGTGAGGGAGATGATGTGTATGATGTCATGTTAAACCAG  
ACCAACCTTCAGTTCAATAACAATAAGTACTACCTAATCCAGCTGCTGGAAGATGATGGT  
GTGAGAAATTTCTGTGTTGGATGCGTTGGGAAGAGTTGGCAAAGTTGGGCAGAACTCT  
CTGGTATGTTGTGGAGGAGACCTACAAAAAGCAAAGATATTTTTCAGAAAAAGTTTCTT  
GATAAACGAAGAAGCTTATGGACTGAGCGAGCACAGTTTGAAAAATGCCCGGTAAATAT  
GATATGCTGCAGATGGACTATAATGCAACTGAGCAGGAAGAAGAGAGAGCAGTGAAGGAA  
GAGAGCCTGGCTGACCTTCCCAAAGTAAAGTCCAGTTAGACCTCAGTATCCAAGAGTTG  
ATTCAGCTGATTTGCAATTTAAAGCCATGGAGGAGACTGTACTTGAGATGAAATTTGAT  
ACAAAGAAAGCTCCCCTAGGGAAACTGACAGTCGATCAGATACGTGCTGGCTACTGCTCC  
CTTCAACGTATTGAAAAGTATTAAGAAGCAAAGTTTGGCCGGGATCTTCTTGAGGCA  
TGCAATGAGTTTACACACGCATTCCCATGACTTTGGGCTACGAACACCTCCTCTTATT  
AGGACATTAGAAGACCTGACAGTAAAAGTTCGGCTATTGGAAGCGCTGGGTGATATTCAG  
ATTGCAGTGAAGTTAGCAAGCATGGATCTCAACTCTCTGGAGCACCTATCGACCGACAG  
TATCGGCAGTAAATTGTTCTATTAGCCCTAGACAAAACATCCAGTACTTTCCAGCTT  
ATTGATGGTTATCTGCAGAGCACCCATGCTCCAACGCACAATGATTACACCATGACACTG  
CTGCAGGTCTTTGAGTTACAGCGAATGGGAGAAGAATGCAGCTTTAGAGCAGACCTCCCT  
AACAGGATGCTGCTGTGGCATGGCTCTCGGCTAACTAACTGGGTCCGAATACTTAGCCAG  
GGACTAAGAGTGGCCCTCCAGAGGCTCCAGTAACTGGGTACATGTTTGAAAAGGGATA  
TATTTTGCTGATGTCTCATCAAAAAGTGCAAATTACTGCTTCTCATCCCGGACAAAAAT  
GTTGGAGTTCTCTACTGTCTGAGGTGGCTCTCGGGGAAAGTAATGAGCTTCTTGCTGCA  
GATTATGATGCCAAAAGAAGCTGAAGTCAAAGCACAGCACAAAAGGATTGGGAAGGAGC  
ATCCAGACCCCAAGAATAGCATCACCCATGACGGAGCTGTGGTTCCATTGGGTCCACTA  
ATAGACACAGGCATGACGAATGACAGCGACTACACGCTAAATTACAACGAGTACATTGTT  
TATGACCCTCATCAGGTTGCGATGAAGTACCTGCTACAGGTCCACTTAACTATAGTTCC  
TTATGG

>Fugu\_PARP2

ATGAGGCGCCAAAGAACCGCAAGAAATAAAAATCAAGCTGTGGAAGAAAGTCCGAGTTCC  
GACACAGTGTGGCAGTGGCAGGGAGACGAAGGACAGTGGGAACCATACTCGCCCTGTGCT  
TGCACCTTACTGAACTCAGCAGTTGCGTCTGGGAACTCTGTCCATCTCTTTGGACTCT  
GGGCAATCCTATGAAGTTGACCTGAAGAAAATGCTTCAGATTAACCCTGTGACCAAGTAC  
AAGAGGAAGATTGTTGTCAGACAGTAAAACCAGAAACCATGGCCAATGCTATTGAGGAA  
AGCCAACAGAGCAGTACTCGAGTTCAAATTAAGAGGAAGAGGAGGAAGAAGATACAAAC  
AAGCAGCCTGCTACTAAGAGGATGAGAGGACAACTAACTATGAAGGAAGTCCCAAAGAG  
AATCCAAAATTGAAGAGGTGGTAAAGACGGTGGTCTGAAAGGAAAAGCTCCAGTGGAC  
TCTGAGTGTAAAGCAAAGCTCAGAAAGGCTCATGTTTACTGAAGGAAATAATGTTTAT  
GATGTCATGTTAAATCAGACAAATCTCAGTTTAATAATAACAAATACTACCTGATGCAG  
CTGTTGGAGGATGATAAATCCAAATTTTACAGTGTGTGGTTAGGTGGGGAAGAGTGGGA  
AAAGTGGGTCAAACAATCTGATCGAATGTGGTGCAGACCTGAACCAAGCCAAAGATATC  
TTCAAGAAGAAGTTCTTTGACAAGACTAAAAATGAGTGGGAGCACAGAGAAAACCTTTATG  
AAAGTAGCAGGAAAATATGACATTGTGCTTATGGACTACAGCGCAGATGAAAAGGAGAAG  
AAAAACGCCATGGTAGATACCAAAAAACAGGCCTCCATGCTGGATGTGAAAATCCAGGAA

CTATTGGAGCTAATCTGTGATCTTAAAGCCATGGAGGAATGTGTGCTGGAGATGAAGTTT  
GATACCCAAAAAGCTCCACTTGGTAAATTGACCTCAGAACAGATCCGTGCAGGCTATGTG  
GCTCTAAGGAAAATTGAGGACTGTTTAAAAAGAAGAGCAGCCGCAATGAGCTGTTGAAA  
GCATGCAACCAGTTCTACTCGCATCCCTCACAACCTTGGGTTGAAAACCTCCAATC  
ATTCATACAGAACAAGAGCTAAAGGAAAAGATTGCACTTTTAGAGGCACTGAGTGATATT  
CAGATTGCTGTGAAAATGGTTAAATCTAATGAAGACGGTGATGAAAATCCACTAGACAGG  
CAGTATCGCTCCCTCCATTGCAGCTTGCAGCCTCTGGACTCCAGCTCCCATGAGTACAGG  
GTAATTGAAAAGTATCTCCAGTCTACTCATGCTCCACCCATTGAGACTACACCATGACC  
GTCATTGACATTTTACCATTGACAGAGAAGGAGAGAGTAACAATTCCTGTACACTTT  
CACAACAGGACTTTGTTGTGGCATGGTTCCCGTCTTCTAACTGGGTTAGCATCCTGAGT  
CAGGGGCTCAGAGTAGCTCCACCTGAGGCTCCAGTCACTGGATACATGTTTGGAAAGGGT  
ATCTACTTTGCTGACATGTCATCAAAAAGTGCTAACTACTGTTTCGCCAATCAGAGTAAC  
CACATTGGACTGCTACTACTGTGTGAGGTACGTTCACTTATTTTCTTGATGGTTCTGTGT  
TGTATCTTCTTAATTAAGATCTGCATTCTTTGCTGTTGATTGAAAATACTCTGGCA  
CTACGA

>Gecko\_PARP2

ATGGGTTCGGAACGGAAGGCCTCCAAAGCCCTGGATGGGGAACCCAGCGATGGAGGGGCG  
GAGTTGGAGCTACGCTGGGAGTGGGAGGCCTCCGACGGCAGGTGGCAGCAGTTCCACCG  
GAGCAGAGTGAGGCCCTCAGCCAGGCGGCCAGGGCAGGAAAGCTTTCTGTGGACCTCGGC  
GAGTCTCCGTCGACCTATGTGGGATGGTGCAGCGGAAGAAGCAGACGGGGCAGGAGACA  
CACGTGGCTGCAGCAGTCCGGGCACAGGACTCTTATTTTGTGTGGCAGTGGCAAGGGGAC  
CAAGAAGGGGATTGGCTTCCGTACCCGGCCAATACCTGCCTGGCCTTGCAGGCAGCCAAG  
AACGGCCACGGGGAGCCACGGTGGAAATGATGGCTGGCCGGACCCGCTACAAGCTGGAC  
ACGACCCGCATGGCGCAGATCAACACCCGTACCGGATTTGAACGCGAGATGGAATGCCGG  
CCGTCTGATGCCGCTGTGCCCGAGGAAGGAAGATCTCAAGGCGGCGACAGCGTCTCCGAT  
CCCAGAGGCCCTGCGGCCACAAAGAAGGCCCGAACGGAGCAGAGGCGGCAGCATCTCCG  
GGAGAGGGGGATGGCAAGGGAGAGGCTGTGAAGACGTTGATCGTGAAGGGGAAAAGTCTCT  
GTGGACCCAGAATGACTGCAAAGATAGACAAAGCTCACGTTTATTGTGAGGGAGAGGAC  
GTTTACGATGTGATGTTAAATCAGACAAATCTTCAGTTCAACAACAACAAGTACTACCTC  
ATCCAGTTGTTGGAGGACGATGGAGCACGAAGCTACAGTGTCTGGATGCGCTGGGGGCGC  
GTGGGTAAACCGGGTCAGCACACCCTCGTGAGTTGCGCTGGAGACTTGAGTAAGGCCAAA  
GCCGTTTTACCAAGAAATCTTGGATAAACTAAGAATGAGTGGCCAAGCGGGGTAAC  
TTCCAGAAGGTTCCGGGCAAATACGACCTTCTCCACATGGACTATGAAGCCCATGATGCA  
GGTGAAGAGGAAGCCACTTCGCAGAAGACAATCTCGTCTCCAAGCCAGCATCACAGCTG  
GATCCACGGGTGCAGGCCTTGGTGGAACTGATCTGCAGCATCCGCACCATGGAAGAGATG  
GTTGTGGAGATGAAGTATGACACCAAGAAGGCCCTCTAGGAAAAGCTGACAGCTGAACAG  
ATCCGGGCGGTTACCAGTCGCTGCAAAAGGTGGAGGCCTGTCTGAAGAGGAAGCAGACT  
GGCCGCGCCCTGCTGGAGGCCTGCAACGAGTTCTACTCTCGGATCCCCACGATTTTGGG  
CTGAAGACTCCCCATTGATAAAGTCAGAAGAGGAGTTGCAAGAGAAAAGCGCAGCTCTTA  
GAGGCCCTGGGCGAGATCCGCATCGCCATCAAGCTGGTGCAGTCAGAGCAACTGGCCCTG  
GAGACCCGCTGGACCGGAGCTACCGCGGACTGAGCTGCCAACTGCAGCCCTTGGAGAGG  
GATACCCCGGACTTCCAGGTATTAGAGCGATACCTGCTGTCCACCCATGCCCGACCCAC  
ATGGATTACAATGACCCCTCTGGAGGCCTTCGTGCTGGACAAGGGCAGTTCCGCCTTC  
CGCTCTGACCTGCCAACCGGATGCTGCTGTGGCACGGATCCCGCCTGGGAAACTGGGCC

GGGATTTT GAGCCAGGGTTGCGAGTGGCACCCGAGGCTCCCGTCACAGGCTACATG  
TTTGGGAAAGGGATCTATTTGCTGACATGTCCTCTAAGAGCGCAATTACTGTTTCGCC  
ACCCGTGAGAGAGACATTGGCCTACTCTTGCTTTCAGAGGTGGCTCTGGGCGAATGCAAC  
GAACTGCTGGAGGCAAATCCCGAAGCCGTGAATTTGCCGCCCCACAAGCACAGCACAAA  
GGGCTCGGCAAGCTGGCCCCGGCCAACAGCACCACTCTGCATGAGGCTGTTGTTCTATG  
GGTCCAGTCGGGGAGACAGGTGTGGTAAACCCCCACGGCTACACCCTGAACTACAATGAA  
TTCATCGTCTATGACCCGAGCAGGTGCGGATGAGGTATCTCTCAAGGTGCACTTCAAT  
TTTACTCAGCTCTGG

>Gharial\_PARP2

ATGTCCCTCCGTCTTGTGCCTGTCCAGGGATGGGCCGCAAGCGGGCGGCACCGGAGGCG  
GGTGACCGGGAGCTGGAGCTGCGCTGGGAGTGGCAGGATGCTGCGGGCACTTGGCATTGG  
TACTCCCCGAGCAGAGCAGGGTGTCTACGCAGGCGGCCAGGGCCAGGAAGCCCAGCGTG  
GATGTTGGGGCCTGCGTGGACCTGAGAAGGATGGTGCAACAGGACACACAGACGGGGCAG  
GACAGACCCGTGGCAGCTGCTGTCCGGGACCAGGACTCGTACTTCATCTGGCAGTGGCAG  
GGCGATGAGGAGGGGGACTGGCTCCCCTACCCTGCTGATACCTGCTTAGCTCTGGAGCGG  
GTGCGACGTGGGGAGGGGGAGCCAACCTTGAGATGACTGTTGGCCGGACCCGCTACGCG  
CTGGACACAGCCCAGATGACCCAGACCAACTGAGAACCAGGTATCAACGCAAGATGGAC  
CGCAGGGAGTCAGATGCAGTGGTTGATAGTAAGGAATCTCAAGCGAGCTACACTCCCAGC  
TCCACAGCCCTCCAAGAGGCTCAAGCACTGAAGAGGTCCCGCGGTGGGGGGTCCATCCCA  
GACCCAGTGGCTAAAGAAGTTGATGGGGGAGAGGTCAAAGAGGCCGTTAAGACCCTAGTA  
GTGAAGGGGAAAGCACCAGTGGATCCCGAGTGTCTGCTAAGCTTGGGAAGGCTCATGTG  
TACTGTGAGGGGGACGACGTCTATGATGTGATGCTGAACCAGACGAATCTCCAGTTCAAC  
AACAACAAGTTCTACATCATCCAGCTCCTGGAGGATGATGGGCAGCGGAGCTACAGTGTC  
TGGATGCGGTGGGGGCGCGTGGGGCGTCCAGGCCAGCACACTGGTATCCTGCGCTGGG  
GATCTTGACAAAGCCAAGGAAGTCTTACCAAGAAGTTTCTGGATAAGACGAAGAACAGC  
TGGCCCAGTCGGGGCAGCTTCCAGAAGGTGCCAGGCAAATACGACCTGCTGCATATGGAC  
TACCAGGCCACGGTCCAGATAAGGAAAGCCGCCCTGAGAAGGTAATGTCCCAACCCAAA  
CCAGCCTCCCGACTTGACCCCCGCGTGCAGGCACTGGTGGAGCTCATCTGTAACATCCAG  
ACCATGGAGGAGATGGTGATTGAGATGAAGTATGACACTAGGAAGGCCCCATTGGGGAAG  
TTGACAGCAGAGCAGATCCGGGCTGGGTACCGCTCGCTGCAGAAGGTGGAGGCGTGTCTG  
CAAGAGGGAAGCGCTGGCCGGGCCCTGCTGGACGCCTGCAACGAATTCTACACCCGAATC  
CCGCACGACTTTGGGCTCCGAACGCCCCAATGATCCGGACGAAGCAGGAGCTGCAGGAA  
AAGATGCAGCTGCTGGAGGCCCTGGGCGAGATTGAAATTGCTATCAAAGTAGTGTGCTCA  
GAGAGGCAGGACCATGAGCACCCACTGGACCAGCACTACCACCAACTGGGCTGCGAGTTG  
TGTGCCCTGGACAGGGACACCCATGATTTCCAGGTGCTGGAGCAGTACCTGCTGACCACC  
CATGCACCCACCCACCGGACTACTCCATGGAGCTGCTGGAGGCCTTTGCCCTGCGCCGC  
CCGTCTGAGGAGACGACTTTCCGCACTGACCTTCCCAACAGGGTGTGCTGTGGCATGGC  
TCCCGGCTGGGCAACTGGATGGGCATCCTGAGCCAGGGGCTGCGAATCGCACCCCCAGAG  
GCTCCTATGACTGGCTACATGTTCCGGGAGAGGCATCTACTTTGCTGACATGTCCTCCAAG  
AGTGCCAATACTGCTTTGCTTCCCGTCAGAAGGATGTGGGGCTCCTGCTGCTGTCAGAG  
GTGGCCTTGGGTGAGTGCAATGAGCTGTTGGAGGCTAATGCTGATGCCAGAAGCTCTTG  
AACGGGAAACACAGCACCAAGGGGATGGGGAAGATGGCTCCTGCTAACCTACCAAGCTG  
GATGGACCGTGGTCCCTTAGGACCCGCTGTGGACACCGGAGTGGTGAACCCCATGGC  
TACACCCTGAACTACAATGAATTCATCATCTATGACCCGTGCCAGGTGCGCATGCGCTAC

CTGCTCAAGGTGCGCTTCAACTTCACGCAGCTGTGG

>Anole\_lizard\_PARP2

ATGGGGAGGAAACGAAAGGCCCGGAGTCTCAGAACGGAGAGCCAGTTCCTCTGGGGTT  
GATCTAGAACTGCGCTGGGAATGGGAGAGCTGTGATAACCGATGGCAGCAGTTTCCACCT  
GGAGAGAACGAAGCTTTGAGCCAAGCCGCCAGGGCTGGGAAGCTGTCCTCAGATATTGGG  
GAGTCCTGTATTGATTTGCGCAGGATGGTGCAGCAGGATAAACAGACCGGGGAGGAAACC  
CGTGTGGCTGCGGCTGTCCGGGATCAGGATTCCTACTTTGTCTGGCAATGGCAAGGAGAC  
CCAGAAGGCACCTGTTTTGCGTACCCTGCGGACACTTGCTGGCTTTGGAGGCTGCCAGG  
AAGAGTCATGGGGAGCCACTGTCAAGGTGACAGTCGGCAGGACACACTACAAGCTTGAC  
ACGACTCGCATGGTACAGATCAACACCCGGACTGCGTTTGAGCGCCAGATGGAACGTAGA  
GAGTCAGATGTCACCGAGGTTCCAGGATGAAGGGTCCAGCTGAGCAACAGTGCTGTGAAT  
ACTACTACCACCCCGTTCTGCCAAGAAGGCTCGGAATAGAGGAGGCGCTTCAGCATCT  
CAGGGGGAGGGGGATAGCACAGAAGCTGTAAAGACGCTGATAGTGAAGGGAAAAGCCCTT  
GTGGATCCAGAATGCACTGTAAGCTGGGGAAGGCTCACGTTTATTGTGAAGGAGATGAT  
GTTTATGATGTGATGTTAAATCAGACGAATGTCCAGTTCAACAATAACAAGTACTACCTC  
ATCCAGCTGTTGGAAGATGATGCCTCAAGGAACTACAGTGTGGATGCGCTGGGGACGA  
GTGGGTAAACCGGGTCAACCTTACTGTGAGCTTTGCTGGAGCCTTAGCTAAAGCTAAA  
GACCTCTTACCAAAAAATTCTGGACAAAACCAAGAACGAGTGGACCAAGCGGCAGAAC  
TTCACAAAGGTTCTGGAAAATATGATCTCCTCCACTTGACTACGAAGCCAATGACACA  
AGTGAGGAAGAAGCTGCCTCTGAGAAAACCAATTCTGTGTCGGACACCAGTGTACAGACTG  
GAGCCACGAGTTCCAGGCTTGGTGCAGCTGATCTGTAATATCCGCACCATGGAGGAGATG  
GTGATGGAGATGAAATACGATACTAAGAAGGCCCTTTAGGAAAGCTGACAGCTGAGCAG  
ATCCGGGCAGGATACCAGTCCCTGCAGAAAGTGGAGGCGTGCCTTAAACGGAAGCAAACC  
GGTCGGACTTTGCTGGAGGCTTGAATGAATTCTACACAAGGATTCCCCACGATTTTGGG  
TTGAAAACCTCCTCATTGATTCACACAGAAAAGGAACTGAAAGAGAAGGTGCAGCTGCTG  
GAGGCCCTTAGTGAGATTCGGATCGGTATCAAAGCGGTGCGGTCAGAGCAGCTGGACCAG  
GAGCACCCGCTTGACCGCAATTACCGTGGATTAATTGTGACCTCCAGCCCTTGAGAGAAG  
GAGAGTCTGACTTCCAGGTCCTTGAGCGTACCTGTCTCCACGCATGCCCCGACCCAC  
CAGGACTACCCATGACCCTACTGGAGGTCTTTGTCTGAAGAAGGAGAATGCTGATTCC  
GACTCAGTCTTCTGTTCTGACCTTCCCAACCGGATGCTACTTTGGCACGGATCCCGCTTG  
GGCAACTGGGCAGGGATCTGAGCCAGGGTTGCGGGTGGCACCCCCAGAGGCGCCTGTG  
ACTGGCTACATGTTTGAAAAGGGATCTATTTGTCAGACATGTCTTCTAAGAGTGCCAAT  
TACTGCTTTGCAACCCGGGAAAAAGACATTGGCCTGCTGCTGCTTTCAGAGGTGGCTCTG  
GGCGAATGCAATGAATTGCTAGAAGCAAATCACGAAGCAGAGAAATTGCTGGCTGGCAAA  
CATAGTACTAAAGCCCTCGGAAAGTTAGCTCCATCCCCAGCCAACAGTGTCACTGCAT  
GGAGCTGTGGTTCCCTTGGGGCCTGCGATAGACACTGGAGTAACGAACCCTCACGGCTAT  
ACCCTGAACTACAATGAGTTCATTGTCTATGATCCGCGACAGGTGCGCATGAAGTACCTC  
CTCAAGGTGCGCTTCAATTTTACCCAGCTCTGG

>green\_sea\_turtle\_PARP2

ATGACCCAGACCAACGTGCAAGCCGATACCAGCGCCGGATGGAACGGAGGGAGTCAGGT  
ACGAACTCGTCCCCACAACGGCCCTCAGCACAAAGAGACCCCGGGATGGTGGGGCCAGC  
CCCAACCCCGGAGCCGGGGGAGAGAGCACAGAGGTCATCAAGACCCTGATTGTGAAGGGG  
AAGGCGCCGGTGGATCCCGAGTGCTTGCTAAACTGGGGAAGGCCATGTTTACTGCGAA  
GGGACGATGTCTATGACGTGATGCTGAACCAGACCAACCTCCAGTTCAACAACAACAAG

TTCTACGTCCTACAGCTGCTGGAGAACGATGGGTCGCGGAGCTACAGTGTCTGGATGCGC  
TGGGGCGTGTGGGGCGGCCAGGCCAGCACATGCTGGTGTCTGCGCTGGGGACCTCGTC  
CAGGCCAAGGAGATCTTCACTAAGAAGTTCCTCGACAAGACCAAAAACCACTGGGCCGAG  
CGGGGCAACTTCCAGAAAGTGATGGGCAAGTACGACCTGCTGCACATGGACAGCCAACCC  
CCCGTCCAGGCCAAGGAGATCTTCACTAAGAAGTAAGCCACAGAGCTGAGCTGCGCGGGG  
GCCCCCGGCCCCAGCTGGCCTCACAGCTAGACCCCCGAGTGCAGGCGCTGCTGGGGCTG  
GTCTGTGACCTGCAGGCCATGGAGGAGATGGTGTCTGGAGATGAAGTATGACACCAAGAAG  
GCCCTCTTGGGAAGCTGACGGTGGAGCAGATCCGTGCCGGGTTCCAGTCACTGCAGAAG  
GTGGAGGCGTTCGCGAGCCGGGGACACCGGGCGGGCCCTGCTGGAGGCCTGCAACGAG  
TTCTACACCCGCGTGGCCCATGACTTTGGGCTCCGGACCCCCATTGATCCGGACACGG  
CAGGAGCTTCAGGAGAAGGTGCAGCTGCTGGAGGCCCTGGGTGAGATCCAGATTGCCATC  
AGGCTGGCACACTTGGAGCTGCACGGCCAGGAGCATCCCCTGGACCAAAGCTACCGCAAG  
CTGGGCTGCGAGCTCCGCCCCCTGGACCGGGACTCCGCCCACTTCCAGGTGCTGGAGCGG  
TACCTGCTCTCACCCATGCGCCCACCCACCGTACTACTCCATGGAGCTGCTGGAGGCC  
TTCGCCCTGCGCCGGGCTGGCGAGCCCCCTTCTGCACCAGCCTGCCAACCGGTTTGGG  
GGCTGGGAATGGATGTTGCTGGGGCACGGCTCCAGGCTGGGCAACTGGGTGGGGATCCTG  
AGCCAGGGGCTGAGAGTGGCGCCCCCTGAGGCCCTGTACCGGCTACATGTTCCGGGAAG  
GGCATCTACTTCGACAGCATGTCATCCAAGAGCGCAACTACTGCTTCGCCTCACGCCAG  
CGCGACGTGGGCTGCTGCTGTGCGAGGTGGCCCTGGGCGAGTGCCAGGAGCTGCTG  
GAGGCAAATGCTGAGGCCAGGAAGTGCCACCTGGGAAGCACAGTACCAAGGGGCTGGGG  
AAGCTAGCGCCCCGCCAACAGCGTCATGCTGGATGGGGCTGCAGTGCCCCTGGGC  
CCAGCGGTGGAGACGGGCGTGACGAACCCCATGGCTACACCCTCAACTACAACGAGTTT  
GTCGTCTACGACCCGGGCCAGGTGCGGATGCGCTACCTGCTCCAAGTGCCTTCACTTT  
GTGCAGCTGTGG

>Horse\_PARP2

ATGCTGAATCAGACCAATCTTCAGTTCAACAACAACAAGTACTATGTGATTCAACTGTTA  
GAAGATGATGCCAGAGGAACCTTCAGTGTGGATGAGATGGGGCCGAGTTGGGAAAGTG  
GGGCAGCACAGCTTGGTGGCTTGTTCAGGGGACCTCAACAAGGCCAAGGAAATCTTTCAG  
AAGAAATTCCTTGACAAAACAAAAACAATTGGGAGGGTCGTGAGAAGTTTGAGAAGGTG  
CCTGGCAAATATGATATGCTGCAGATGGACTATTCCACCACTACTCAGAGTGAAGAGGAA  
ACTAAAAAGAGGAATCTCTTAAATCCTCTTGAACACAGAGTACAGCTAGATCTTCGT  
GTCCAGGAGCTGATAAAGTTGATCTGTAATGTCCAGGCCATGGAAGAGATGATGGTAGAA  
ATGAAATATGATACCAAGAAAGCCCCACTTGGAAAGCTGACAGTGGCACAATCAAGGCA  
GGTTACCAGTCGCTTAAAGAAATTGAGGATTGTATTCGAGCTGGCCAGCATGGACGAGCT  
CTCACAGAAGCATGCAATGAATTCTATACTAGGATCCACATGACTTTGGACTCCGTACC  
CCTCCTTAATCCGGACAGAGAAAGAACTATCAGAAAAAGTACAGCTGCTAGAGGCTTTG  
GGAGACATTGAAATTGCCATGAAGCTGGTGAAGACAGAGCTGCAAAGCCCAGAACACCCA  
TTGGACCAACACTATAGAAGATTACATTGTGCCCTTGCGCCCTTAGACCGTGACAGTTAT  
GAGTTCAAAGTGATTTCCAGTACCTACAGTCTACTCATGCTCCACACACAGTACTAT  
ACCATGACCTTGCTGGATGTTTTTGAAGTAGAGAAGGAGGGTGAGAAAGAAGCCTTCAGA  
GAGGACCTTCATAACAGGATGCTGCTATGGCATGGTTCCAGGTTGAGTAACTGGGTGGGA  
ATCCTGAGCCATGGGCTTCGAATTGCCCCACCTGAAGCTCCCATCACAGGTTACATGTTT  
GGAAAAGGAATCTACTTTGCTGACATGTCTTCCAAGAGTGCCAATTAAGTCTTGCCTCT  
CACCTAAAGGATACTGGGCTGCTGCTTATCAGAGGTCGCTCTAGGTCAGTGAATGAG

CTACTAGAGGCCAATCCTGAGGCCGAAGGGTTACTTCAAGGAAAAACAGCACCAAAGGA  
TTGGGCAAGATGGCTCCCAGTCTGCCTGCTTACCACCCTGAATGGAAGTACAGTGCCC  
TTAGGACCAGCAAGTGAAACAGGAATTCTGAATCCAGAGGGTTATACCCTCAATTACAAT  
GAATTTATTGTCTACAGCCCCAACAGGTCCGTATGCGATACCTTCTAAAGATTGATTT  
AATTTCTTGCAGTTGTGG

>Human\_PARP2

ATGGCGGCGCGGCGGCGACGGAGCACCGGCGGCGCAGGGCGAGAGCATTAAATGAAAGC  
AAAAGAGTTAATAATGGCAACACGGCTCCAGAAGACTCTTCCCCTGCCAAGAAAACCTCGT  
AGATGCCAGAGACAGGAGTCGAAAAAGATGCCTGTGGCTGGAGGAAAAGCTAATAAGGAC  
AGGACAGAAGACAAGCAAGATGAATCTGTGAAGGCCTTGCTGTTAAAGGGCAAAGCTCCT  
GTGGACCCAGAGTGTACAGCCAAGGTGGGGAAGGCTCATGTGTATTGTGAAGGAAATGAT  
GTCTATGATGTCATGCTAAATCAGACCAATCTCCAGTTCAACAACAACAAGTACTATCTG  
ATTCAGCTATTAGAAGATGATGCCAGAGGAACCTCAGTGTTTGGATGAGATGGGGCCGA  
GTTGGGAAAATGGGACAGCACAGCCTGGTGGCTTGTTCAGGCAATCTCAACAAGGCCAAG  
GAAATCTTTCAGAAGAAATTCCTTGACAAAACGAAAAACAATTGGGAAGATCGAGAAAAG  
TTTGAGAAGGTGCCTGGAAAATATGATATGCTACAGATGGACTATGCCACCAATACTCAG  
GATGAAGAGGAAAACAAGAAAGAGGAATCTCTAAATCTCCCTTGAAGCCAGAGTCACAG  
CTAGATCTTCGGGTACAGGAGTTAATAAAGTTGATCTGTAATGTTTCAGGCCATGGAAGAA  
ATGATGATGGAAATGAAGTATAATACCAAGAAAGCCCCACTTGGGAAGCTGACAGTGGCA  
CAAATCAAGGCAGGTTACCAGTCTCTTAAGAAGATTGAGGATTGTATTTCGGGCTGGCCAG  
CATGGACGAGCTCTCATGGAAGCATGCAATGAATTCTACACCAGGATTCCGCATGACTTT  
GGACTCCGTACTCCTCCACTAATCCGGACACAGAAGGAACTGTCAGAAAAAATACAATTA  
CTAGAGGCTTTGGGAGACATTGAAATTGCTATTAAGCTGGTGA AACAGAGCTACAAAGC  
CCAGAACACCCATTGGACCAACACTATAGAAACCTACATTGTGCCTTGCGCCCCCTTGAC  
CATGAAAGTTATGAGTTCAAAGTGATTTCCAGTACCTACAATCTACCCATGCTCCCACA  
CACAGCGACTATACCATGACCTTGCTGGATTTGTTTGAAGTGGAGAAGGATGGTGAGAAA  
GAAGCCTTCAGAGAGGACCTTCATAACAGGATGCTTCTATGGCATGGTTCCAGGATGAGT  
AACTGGGTGGGAATCTTGAGCCATGGGCTTGAATTGCCCCACCTGAAGCTCCCATCACA  
GGTTACATGTTTGGGAAAGGAATCTACTTTGCTGACATGTCTTCCAAGAGTGCCAATTAC  
TGCTTTGCCTCTCGCCTAAAGAATACAGGACTGCTGCTTATCAGAGGTAGCTCTAGGT  
CAGTGTAATGAACTACTAGAGGCCAATCCTAAGGCCGAAGGATTGCTTCAAGGTAAACAT  
AGCACCAAGGGGCTGGGCAAGATGGCTCCAGTTCTGCCACTTCGTCACCCTGAATGGG  
AGTACAGTGCCATTAGGACCAGCAAGTGACACAGGAATTCTGAATCCAGATGGTTATACC  
CTCAACTACAATGAATATATTGTATATAACCCCAACCAGGTCCGTATGCGGTACCTTTTA  
AAGTTTCAGTTAATTTCTTCAGCTGTGG

>Macaque\_PARP2

ATGCCTGTGACTGGAGGAAATGCTAATGAGGACAGGACAGAAGACAAGCAAGATGGTACG  
CCAGGGAGGTCATGGCCAGCAAGAGGGTTTCTGAATCTGTGAAGGCCTTGCTGTTAAAG  
GGCAAAGTTCTGTGGACCCAGAATGTACAGCCAAGGTGGGGAAGGCTCATGTGTATTGT  
GAAGGAAGTAATGTCTATGATGTCATGCTAAATCAGACCAATCTCCAGTTCAACAACAAC  
AAGTACTATCTGATTAGCTATTAGAAGATGATGCCAGAGGAACTTCAGTGTGGATG  
AGATGGGGCCGAGTTGGGAAAATGGGACAGCACAGCCTGGTGGCTTGTTCAGGCAATCTC  
AACAAAGGCCAAGGAAATCTTTGAGAAGAAATTCCTTGACAAAACAAAAACAATTGGGAA  
GATCGAGAAAAGTTTGAAGGATGCCTGGAAAATATGATATGCTACAGATGGACTATGCC

ACCAATACTCAGGATGAAGAGGAAACAAAGAAAGAGGAATCTCTTAAATCTCCCTTGAAG  
CCAGAGTCACAGCTAGATCTTCGGGTACAGGAGTTAATAAAGTTAATCTGTAATGTTTCAG  
GCCATGGAAGAAATGATGATGGAAATGAAGTATAATACCAAGAAAGCCCCACTTGGGAAAG  
CTGACAGTGGCACAAATCAAGGCAGGTTACCAGTCTCTTAAGAAGATTGAGGATTGTATT  
CGGGCTGGCCAGCATGGACGACCTCTCATGGAAGCATGCAATGAATTCTACACCAGGATT  
CCGCATGACTTTGGACTCCGTACTCCTCCACTAATCCGGACACAGAAGGAACTGTCAGAA  
AAAATACAATTAAGAGGCTTTGGGAGACATTGAAATTGCTATTAAGCTGGTGAACA  
GAGCTACAAAGCCAGAACACCCATTGGACCAACTATAGAAACCTACATTGTGCCTTG  
CGCCCTTTGACCATGAAAGTTATGAGTTCAAAGTTATTTCCAGTACCTACAATCTACC  
CATGCTCCCACACACAGCGACTATACCATGACCTTGCTGGATTTGTTTGAAGTAGAGAAG  
GAGGGTGAGAAAGAAGCCTTCAGAGAGGACCTTCATAACAGGATGCTTCTATGGCATGGT  
TCCAGGCTGAGTAACTGGGTGGGAATCTTGAGCCATGGGCTTCGAATTGCCCCACCTGAA  
GCTCCCATCACAGGTTACATGTTTGGGAAAGGAATCTACTTTGCTGACATGTCTCCAAG  
AGTGCCAATTACTGCTTTGCCTCTCACCTAAAGAATATAGGACTGTGCTTATCAGAG  
GTAGCTCTAGGTCAGTGAATGAACTACTAGAGGCCAATCCTAAGGCCGAAGGATTGCTT  
CAAGGTAAACACAGCACAAAGGGCTGGGCAAGATGGCTCCCAGTTCTGCCACTTCGTC  
ACCCTGAATGGGAGTACAGTGCCATTAGGACCAGCAAGTGACACAGGAATTCTGAATCCA  
GATGGTTATACCCTCAACTACAATGAATATATTGTCTATAACCCCAACCAGGTCCGTATG  
CGGTACCTGTTAAAGGTTTCAGTTTAAATTCCTGCAGCTGTGG

>Medaka\_PARP2

ATGAGGCGAACTAGGGGTTCAATGAATAAAAACCAAAGTTTGCCAAAAACGAAGACATG  
GAGTCAATAACAGAATGGCAGTGGCAGGGGACGGAGGCCGGTGGGAGTCATACCCGCCG  
GCGGCGTGTGCCCTGCTGGATTCCGGCTGTGTGCGGGAACACCGGCCGCTCACTCTGAAC  
GCGGGTCCGGCACCGCATAACGAGGTGGATCTGAAGAACATGGTCCAGATCAATCCTGTC  
ACAAAGTACCGAAGGAAAATTCGCAGTCAGACTGTGAAACCAGACAGTTTAAATGAAGCT  
GAACCACAACCTGTCCAGGTTAAAGAGGAAGAGGAGGAGACAGAGGAGCAACCTGTGACG  
AAGAAAAGAAGAGGACGAAGCAAGAGTCAGGCAAAAAGCCAAGAAGGAAACAGTGAAGTT  
GTGAAGACGGTGGTGATGAAGGGCAGAGCTCCAGTGGACCCTGAATGCAACGCCAAACTC  
GGAAAGGCTCATGTTTACAGTGAAGGAAGCATCGTCTATGATGTGATGCTGAACCAGACA  
AACCTTCAGTTCAACAACAATAAGTTCTACCTGATCCAGCTTCTGCAGGACGACAGCTCC  
AAGTCCTCAGCGTGTGGATGCGATGGGGCAGAGTGGGCAAAGTGGGCCAGAACAGCCTC  
ACGGCGTGTGGTGGAGATCTGCTGAAGGCCAAGGACATCTTCAAGAAGAAGTTCTTTGAT  
AAAACCAGGAATGAGTGGGAACAGCGGGGGAGTTTTGTGAAAGTGGCTGGGAAGTATGAC  
ATGGTGTATGACTACAGCACCAATGAGAAGGAGGAGAACACCACAGTGGTGGATGCT  
GCTACCAACAAGAGGAGCTGCAAGTTGGATCCAAGGTTTCAGTCTCTCCTGGAGCTGATC  
TGTGACCTCAAAGCCATGGAGGAGTGTGTGCTGGAGATGAAGTTCGACACACGGAAAGCT  
CCTCTGGCAAGCTGACTTCGGAACAGATCCGTGCGGGCTATGCAGCGCTGAAGAAGATC  
GAGGAGTGCTTAAAGAGGAAGGGCAGCAGTCGGGACCTGCTGGAAGCATGCAACCAGTTT  
TACACACGCATCCACATGACTTTGGATTGAGACCTCCTCCGGTCATCCATACAGATGCT  
GAGCTGAAGGAGAAGATTTCCCTGCTGGAGGCGCTGAGTGACATCCAGATCGCAGTGAAG  
ATGGTCCAGTCCAGCGCAGACAGTGAGGAGCATCCTCTGGACCGACATTACCACTCTCTG  
AAGTGTAACCTGCAGCCGCTGGACTCCACCAGCTCTGAGTTCAAGGTGATAGAGAAGTAC  
CTGCAGTCCACTCATGCCCCACCCACGGGACTACGGCATGACGGTGTGGACATCTTC  
TCAGTGGACAGAGACGGGAGAGTGAGAGCTTCTCTCAGATCTGCACAACAGGACTCTG



CTGTGGCACGGCTCCCGGCTCTCAAAGTGGGTGGGCATCCTCAGCAAGGGCCTCCGAGTG  
GCCCCGCTGAGGCCCTGTACAGGGTATATGTTTGGTAAAGGAATCTACTTTGCTGAC  
ATGTCATCAAAAAGTGCCAACTACTGCTTCGCCAACAGAGCAACCATGTGGGCCTGCTG  
CTTCTATGTGAGGTTGCTCTGGGAGACTGCAACGAGCTGCTGGATGCAGACTATGAAGCC  
AATAATCTCCCTGCAGGAAAACACAGCACCAAGGGCCTGGGACAGACGGCGCCTGACCCC  
AAAAACTCTGTCACTCTGGATGGCGTGACGGTGCCGATGGGTCCAGGAGTGAAAACGGGA  
GCGGCTAACAGCAGCGGTTACTCCCTCTCTACAACGAGTTCATCGTTTACAGTCCAGCT  
CAGACTCGCATGAGGTACCTGCTGCGCATCCAGTTCAACTATTCGTCTCTGTGG

>Mouse\_PARP2

ATGGCGCCGCGGCGGCAGAGATCAGGCTCTGGAAGGCGAGTGCTAAATGAAGCCAAGAAA  
GTTGATAATGGCAACAAAGCAACAGAAGACGACTCTCCTCTGGCAAGAAGATGCGCACG  
TGCCAGAGAAAAGGGCCTATGGCTGGAGGGAAGGACGCAGACAGGACAAAAGACAATCGA  
GACTCTGTGAAGACCTTGCTGTTAAAGGGCAAAGCCCCTGTGGACCCAGAGTGTGCAGCC  
AAGGTGGGAAAGGCTCATGTGTATTGTGAAGGAGATGATGTCTATGATGTCATGCTAAAT  
CAAACCAATCTCCAGTTCAACAACAACAAGTACTACCTTATTTCAGCTGTTAGAAGATGAT  
GCCCAGAGGAACTTCAGTGTGGGATGAGGTGGGGCCGAGTTGGAAAGACGGGGCAGCAC  
AGCTTGGTGACTTGTCTGGTGACCTCAACAAAGCAAAGAAATATTTTCAGAAAAAATTC  
CTTGACAAAATAAAAACAATTGGGAGGATCGTGAGAACTTTGAAAAAATACCTGGAAAA  
TACGACATGTTACAGATGGACTATGCTGCCAGCACGCAGGATGAAAGTAAAACAAAAGAA  
GAGGAACTTTGAAGCCTGAGTCTCAGCTGGATCTTCGAGTCCAGGAGCTGCTAAAGTTG  
ATCTGTAACGTGCAGACCATGGAAGAAATGATGATTGAGATGAAGTATGACACCAAGAGA  
GCCCCGCTTGGAAAGCTGACAGTGGCGCAAATCAAGGCCGTTACCAGTCTCTCAAGAAG  
ATTGAGGACTGCATCCGCGCTGGCCAGCATGGGCGAGCGCTTGTGAAGCGTGCAATGAA  
TTCTACACCAGGATCCCTCATGACTTTGGACTCTCCATCCCTCCAGTAATCCGGACAGAG  
AAGGAACTGTCAGACAAAGTAAAAGTACTGCTAGAGGCATTGGGAGACATTGAAATTGCCCTT  
AAACTGGTGAAGTCAGAGCGCCAAGGCCTAGAACACCCACTGGACCAACACTATAGAAAC  
CTACACTGTGCTTTGCGTCTCTGGACCATGAAAGTAATGAGTTTAAAGGTGATTTCTCAG  
TACCTACAGTCTACGCATGCTCTACACACAAGGACTATACTATGACCTTGCTGGATGTT  
TTCGAAGTAGAGAAGGAAGGGGAGAAAGAGGCCTTCAGGGAGGACCTTCCTAACAGGATG  
CTGCTCTGGCATGGATCCAGGCTGAGTAACTGGGTGGGGATCCTGAGCCACGGGCTTAGA  
GTTGCCACCTGAGGCTCCCATCACAGGTTATATGTTTGGAAAAGGAATCTACTTTGCT  
GACATGCTCTCAAGAGTGCCAATTACTGCTTTGCCTCTCGCCTAAAGAATACAGGATTG  
CTTCTTCTGTGAGAGGTAGCTCTAGGTGAGTGAATGAACTACTGGAGGCCAATCCTAAA  
GCACAAGGATTGCTTCAGGGCAAGCATAGCACCAAGGGGATGGGAAAGATGGCTCCCAGC  
CCTGCCACTTCATCACCTGAATGGGAGTACAGTGCCCTTAGGACCAGCAAGTGACACA  
GGAATTCTCAATCCAGAGGGGTACACCCTCAACTACAATGAGTTTATTGTTTATAGCCCC  
AACCAGGTCCGATGCGATACCTTCTAAAGATTCAATTTAACTTCTGCAGCTATGG

>Naked\_mole\_rat\_PARP2

ATGGCGGCGAGACGGCGTGCCAGGAGCGGCCGCGGAAGCTGGCTTCTACAGTATTAAT  
GAAACCAAGAGAGATAATAATGGCACTCCAGTACAGAAGACTCACCTCCTGCCAAGAAA  
ACTCGAAAATGCCAGAGACAGAGAGTGAAAAGGAGCCTGTGGCTGGAGGAAAGGCTGAT  
AAGGGCAGGACAGAAGACACACAAGAACCAGTGAAGTCATTGCTGTTAAAGGGCAAAGCT  
CCTGTGGACCCAGAGTGTACAGCCAAGGTGGGAAAGGCTCATGTGTATTGCGAAGGAGAT  
GATGTCTACGATGTCATGCTAAATCAAACCAATCTCCAGTTCAACAACAACAAGTACTAC

CTTATTCAGCTGTTAGAAGATGATGCCCGGAGAACTTCAGTGTTTGGATGAGATGGGGT  
CGAGTTGGGAAAATGGGCCAGCACAGCTTGGTGACTTGTTTCAGCTGACCTCACCAAGGCC  
AAGGAAATCTTTCAAAGAAATCCTTGACAAGACAAAAAATAATTGGGAGGATCGTGAG  
AAGTTTGAAAGGTCCCTGGAAAATATGATATCCTGCAGATGGACTACGCTACCAACT  
CAGGATGATAATAAAACAAAACAGGAGGACTCCCTTAAGTCCCCCTTGAAACCAGAGTCA  
CAGCTAGATCTTCGGGTCCAGGAGCTGATAAAGTTGATCTGTAATGTCCAGACCATGGAG  
GAGATGATGATTGAAATGAAGTATGACACCAAGAAGGCCCACTTGAAAGCTGACAGCA  
GCGCAAATCAAGGCAGGTTACCAGTCTCTTAAGAAGATTGAAGATTGCATTCGGGGCCGGC  
CAGCATGGACGAGCTCTCCTGGAAGCATGCAACGAGTTCTACACCAGGATCCCACATGAC  
TTTGGACTCCGTACCCCTCCATTAATCCACACCGAGAAAGAACTGTCAGACAAAGTACAA  
CTGCTAGAGGCTTTGGGAGACATTGAAATTGCCATTAAGCTGGTGAAGACAGAACTCCAA  
AGCCCAGAACACCCATTGGACCAATGCTATAGGAACCTGCACTGTACCTTGACCCTCTA  
GACCATGAAAGTCATGAGTTCACAGTGATTTCCAGTACCTACAGTCTACACATGCTCCT  
ACACACCGTGACTACTCCATGACCTTGCTGGAGGCCTTTGAAGTAGAAAAAGAGGGTGAG  
AAAGAAGCCTTCAGAGAGGATCTTCTAACAGGATGCTGCTATGGCACGGTTCAGGCTG  
AGTAACTGGGTAGGAATCCTGAGCCATGGGCTTGAATTGCCCGCCAGAGGCTCCCATC  
ACAGGTTACATGTTTGGAAAGGAATCTACTTTGCTGATATGTCTTCTAAGAGTGCCAAT  
TACTGCTTTGCTCCAGAGTAAAGAATACAGGACTGTTGCTTTTATCAGAGGTAGCTCTG  
GGTCAGTGTAATGAGCTACTTGAGGCCAATCCTAAGGCAGAAGGATTACTTCAGGGCAAA  
CACAGCACAAGGGCCTGGGCAAGATGGCTCCCAGTCTGCCCACTTCATCACCCCTGAAT  
GGGAGTACAGTGCCCTTGGGGCCAGCAAGTGACACAGAAATTCTAAACCCAGGGGGTTAT  
ACCCTCAACTACAATGAGTTTATTGTCTATAACCCAAACCAGGTCCGTATGCGATACCTT  
CTAAAGATTCAATTTAATTTTCTGCAGCTGTGG

>Opossum\_PARP2

ATGGCTTCGCGCAGGAGCGGTAGAAGCACTAGCCATGCCCGAGGTACAAGGATAAAACTT  
CAGTCCCCAGGGTCAGAGTCTGAAAAGAGTGAGGCAGCTTCATCTACAGTTGAATTTTAT  
TGGCAATGGGAGGACTCAGAGGGTATCTGGCATTGGTATCCTTCTACTCAGGATATGGAG  
ATCACAGAGGCTTTCAGGAACGGAAATGCTTTGGTAAATATCTCATCAGATAGTGGAAC  
ATGAAGCTCCAGGTGGACTTCAAGAAAATGGTCCAGAGGACTACAAAGACAAGGACTGAG  
AGGAGAATTGCTGTTGCCGTCAAGGACCAGGGCTCCTATTTTATCTGGCAGTGGCAGGGT  
GATGAGGAAGATGGCTGGATCCCATATGATGCTAAGACTTGCCTGGCTCTGGAGAGAACA  
CTAGCAGAAAGCAATGAGCTGAAGATAGATGTGATGTTTGGCCGAACACGTTATACTCTG  
GATGTAGGCAGCATGGTACAAACCAATTGCAAAAGTGGATACCAACGCAGAATAGAGCGC  
CAGCCTTCAGCTGCTGTGGAGTTGACTGAAGCTAATGGAGGCAGTACGAGAAACATATCT  
AGTGTTTTATCTATGGAATGCCCTTCTAAAGCCAAGAAAGCCCGAGGTGAATTCGTGGTA  
GAAGGAGTGAAACAAGAACTTGTGACAGAAGATGCTGAGAGGAATGGCAAGGCCAAAGAT  
AATGAAGTTTCTGTGAAGACCTTATTAAGGAGGCAAAACTCCAGTGGACCCAGAATGT  
ACAATTAAGTGGGAAAGGCTCATGTACTGTGAAGGGGATGATGTGTATGACGTTATG  
TTGAACCAGACCAATCTCCAGTTCAACAATAACAAGTATTATATCATCCAGCTGCTAGAA  
GATGATGGACAGAGAACCTTCAGTGTCTGGACAAGATGGGGCCGAGTTGGGAAGGTTGGA  
CAGCACAATTTGGTGACCTGTTCTGGGGACCTCAACAAAGCCAAGGAGATATTTCAGAAG  
AAATTTTTGACAAAACAAAAAATAGTTGGGAAGATCGTGGCAGCTTTAAGAAAGTACCA  
GGGAAATATGATATGCTACAACCTGGATTATACAAGCAATATTGAGGGTGAAGAGTCAAAG  
GATGAGGCACCTGTTCTATTTACCTCCAAACTAGAGTCTCAGCTGGAGCGTCCAGTC

CAAGAGCTGATAGAGTTGATTTGTAACATTCAGAACATGGAAGAAATGATGGTGGAGATG  
AAGTATGACATCAAAAAAGCCCCATTAGGGAAGCTGACAGTGGCACAATCAAGGCAGGT  
TACGAGTCACTTAAGAAGATAGAAGATTGTATTGGTCTGGTCAAAGCGGGCGGATCCTG  
GTGGAGGCATGTAATGAATTCTATACTAGGATCCACATGACTTTGGGCTCCGCACGCCA  
CCACTAATCCGAACAGAGCAAGAATTGACAGATAAGATTCAGCTCTTAGAGGCACTGGGA  
GACATTGAAATCGCTATCAAGCTGGTGAAGACAGAGCTTAGGAACCCAGAACACCCACTG  
GACCAGCATTATAGAAACCTACATTGTGTTCTTCGACCCCTGGACCATTCTGTGCATGAA  
TTCAAAGTGATCTCCAGTATCTACATTCTACCCATGCCCTACTCACAATGATTATACG  
ATGACCTTGCTTGATGTCTTTGAAGTGGAGAAAGAGGGTGAGAATGAAGCCTTCAGGAAG  
GATCTTCCAATAGGATGCTGCTGTGGCATGGTTCGACTGGGTAATTGGGTGGGGATC  
CTAAGCCATGGACTTCGCATTGCCCGCCTGAAGCTCCAGTCACAGGCTACATGTTTGGGA  
AAAGGAATATATTTGCTGACATGTCCTCAAGAGTGCCAATTACTGCTTTGCCTCACGA  
CTGAAGGACACGGCCTGTTGCTGCTCTCAGAGGTAGCTTTGGGAGAATGTAATGAGTTG  
CTGGAGGCCAATCCTGAGGCAGCAGGACTACTTCAGGGCAAACACAGCACCAAGGGAATG  
GGCAAGATGGCTCCAATCCCTCCATTATGTTTCTTTGAATGGAACCACAGTGCCTCTA  
GGACCAGTGAGTGGCACAGGAATTCTGAACCCACAGGGCTATACCCTCAATTATAATGAA  
TTCATTGTCTATAACTAGCCAGGTTTCGTATGCGATACCTGCTGAAAATCAGATTCAAT  
TTCACCCAGCTCTGG

>Orangutan\_PARP2

ATGGCGGCGCGGCGGCGACGGAGCGCCGGCGGGCGGTAGGGCGAGAGCATTAAATGAAAGT  
AAAAGAGTTAATAATGGCAACACGGCTCCAGAAGACTCTTCCCCTGCCAAGAAAACCTCGC  
AGATGCCAGAGACAGGAGTCGAAAAAGATGCCTGTGGCTGGAGGAAAATCTAATAAGGAC  
AGGACAGAAGACAAGCAAGATGAATCTGTGAAGGCCTTGCTGTTAAAGGGCAAAGCTCCT  
GTGGACCCAGAGTGTACAGCCAAGGTGGGGAAGGCTCATGTGTATTGTGAAGGAAATGAT  
GTCTATGATGTCATGCTAAATCAGACCAATCTCCAGTTCAACAACAACAAGTACTATCTG  
ATTCAGCTGTTAGAAGATGATGCCAGAGGAACCTCAGTGTTTGGATGAGATGGGGCCGA  
GTTGGGAAAATGGGACAGCACAGCCTGGTGGCTTGTTCAGGCAATCTCAACAAGGCCAAG  
GAAATCTTTCAGAAGAAATTCCTTGACAAAACGAAAAACAATTGGGAAGATCGAGAAAAG  
TTTGAGAAGGTGCCTGGAAAATATGACATGCTACAGATGGACTATGCCACCAATACTCAG  
GATGAAGAGGAAAACAAGAAAAGAGGAATCTCTTAAATCTCCCTTGAAGCCAGAGTCACAG  
CTAGATCTTCGGGTACAGGAGTTAATAAAGTTGATCTGTAATGTTTCAGGCCATGGAAGAA  
ATGATGATGGAATGAAGTATAATACCAAGAAAGCCCCACTTGGGAAGCTGACAGTGGCA  
CAAATCAAGGCAGGTTACCAGTCTCTTAAGAAGATTGAAGATTGTATTGGGCTGGCCAG  
CATGGACGAGCTCTACGGAAGCATGCAATGAATTCTACACCAGGATTCCGCATGACTTT  
GGGCTCCGTACGCCTCCACTAATCCGGACACAGAAGGAACTGTCAGAAAAAATACAATTA  
CTAGAGGCTTTGGGAGACATTGAAATTGCTATTAAGCTGGTGAAAACAGAGCTACAAAGC  
CCAGAACACCCATTGGACCAACACTATAGAAACCTACATTGTGCCTTGCACCCTGTTGAC  
CATGAAAGTTATGAGTTCAAAGTGATTTCCAGTACCTACAGTCTACCCATGCTCCACA  
CACAGTGAATACCATGACCTTGCTGGATTGTTTGAAGTGGAGAAGGAGGGTGAGAAA  
GAAGCCTTCAGAGAGGACCTTCATAACAGGATGCTTCTATGGCATGGTTCCAGGCTGAGT  
AACTGGGTGGGAATCTTGAGCCATGGGCTTCGGATTGCCCCACCTGAAGCTCCCATCACA  
GGTTACATGTTTGGGAAAGGAATCTACTTTGCTGACATGCTTCCAAGAGTGCCAATTAC  
TGCTTTGCCTCTCGCTAAAGAATACAGGACTGCTGCTGTTATCAGAGGTAGCTTAGGT  
CAGTGTAATGAACTACTAGAGGCCAATCCTAAGGCCGAAGGATTGCTTCAAGGTAAACAC

AGCACCAAGGGGCTGGGCAAGATGGCTCCCAGTTCTGCCACTTCGTCACCCTGAATGGG  
AGTACAGTGCCATTAGGACCAGCAAGTGACACAGGAATTCTGAATCCAGATGGTTATAACC  
CTCAACTACAATGAATATATTGTCTATAACCCCAATCAGGTCCGTATGCGGTACCTTTTA  
AAGGTTCAAGTTTAATTTCTTCAGCTGTGG

>Western\_painted\_turtle\_PARP2

ATGAGGCGGAAGCAGAGGGCAGCCGAGGCGGGGGTGCGGGCCTGGCACTGGAGCTGCGC  
TGGGAGTGCCAGGACTCCGGCGGCACCTGGCATCGCTTCGTGCCTGAGCAGAGCGAGGTG  
CTGACACAGGCAGCCAGGGCAGGGAAGCCCAGCGTGGCTGTGGGTCCCGCTGGATCTG  
CGGCGGATGGTGCAGCGGGATGGACAGACGGGGCAGGACAGATGTGTGGCAGCCGCTGTC  
CAGGACCAGGACTCCTGGGGACGAAGAGGGGCAGTGGCTGCCCTGCCGATACCTGCCTGG  
TGCTGGAGCGAGCGCAGCGTGGCGACGGGGGCCGAGAGCCGAGCTGCGCGGGGGCCTCC  
CAGCCCAAACCAGCCTCACGACTGGACCCCGAGTGCAAGCGCTGCTGGGGCTGATCTGC  
GACCTGCAGGCCATGGAGGAGATGGTGCTGGAGATGAAGGATGACACCAAGAAGGCTCCT  
CTCGGGAAGCTGACGGTGGAGCAGATCCGTGCTGGATTCCAGTCACTGCAGAAGGTGGAG  
GCGGCCCTGGGCGAGATCCAGATCGCCGCCACGCTGGAGCGCTTAGAGCTGCATGGCCAG  
GAGACCCGCTGGACCGGAGTACCGCACGCTGGGCTGTGAGCTCCACCCCTGAAGCAG  
AATGGGGCTCCAGTGTCTGCTGGGCCAGCCGTGGAGACGGGCGTGACGAACCCCATGGC  
TACACCCTCAACTACAACGAGTTCGTCTACGAGCCAGGCCAGGTGCGGATGCACTAC  
CTGCTCCAAGTGCCTTCAGCTTCGCCCCGCTGTGG

>Panda\_PARP2

ATGGCTGCCCGACGGCGGGGACGCGCAGCGGGGGCCCGAGCATCAAATGAAGCTGGA  
AGAGTTCATAATGGCAACACAGCCATAGAAGACCCTCCTCCTGCAAAGAAAACCTGAAGA  
TGCCAGAGGCAGGGGGTGA AAAAGGAGCCTGTGACTGGAGGAGAGGCCAATAATGACAGG  
ACAGAAGACAAGCAAGAGTCTGTGAAGACCTTGCTGTTAAAGGGCAAAGCTCCTGTGGAC  
CCTGAGTGCACAGCCAAGGTGGGAAAGGCCCATGTGTACTGTGAAGGGAATGATGTCTAT  
GATGTCATGCTAAATCAGACCAATCTTCAGTTCAACAACAACAAGTACTACTTGATTGAG  
CTGTTAGAAGATGATGCCAGAGACTTCAGTGTGGATGAGATGGGGCCGAGTTGGG  
AAAATGGGGCAGCACAGCTTGGTGGCTGTTCCAGGGGACCTCAACAAAGCCAAGGAAATC  
TTTCAGAAGAAATTCCTTGACAAAACAAAAATAATTGGGAGGATCGTGAGAAGTTCGAG  
AAGGTGCCTGGAAAATATGATATGCTAGAAATGGACTATAACCAATACTCAGAGTGAA  
GAGGAATCAAAAAGGAATCTCTCAATCCCTTTGAAACCAGAATCACAGCTAGATCTT  
CGTGTGCAGGAGCTGATAGAGTTGATCTGTAATGTCCAGGCCATGGAAGAGATGATGGTA  
GAAATGAAATACGACACCAAGAAAGCCCACTTGGGAAGCTGACAGTGGCACAATCAAG  
GCAGGCTACCAATCTCTTAAGAAGATTGAGGACTGTATTGGGGCGGGTCAGCATGGACGA  
GCTCTCATGGAAGCTTGCAATGAGTTCTACACCAGGATCCACATGACTTTGGACTCCGT  
ACCCCTCCATTAATCCGGACCGAGAAAGAACTGTCAGACAAAGTACAATACTAGAGACT  
TTGGGGGACATTGAAATTGCCATCAAGCTGGTGAAGACAGAGCTGCAAAGCCGAGAACAC  
CCATTGGACCAACTATAGAAAATACTATTGTGCCTTGCGCCCTCTAGACTATGAAAGT  
TATGAGTTCAAAGTGATTTCCAGTACCTGCAGTCTACTCATGCTCCACACACAGGGAC  
TATACCATGACCTTGCTGGATGTTTTTGAAGTGAGAAAGGAGGGTGA AAAAGAAGCCTTC  
AGAGAGGACCTCATAACAGGATGCTGCTGTGGCATGGTTCCAGGCTTAGTAAGTGGGTG  
GGAATCCTGAGCCATGGGCTTCGAATTGCCCCACCTGACGCTCCCATCACAGGTTACATG  
TTCGGTAAAGGAATCTACTTTGCCGACATGTCTTCTAAGAGTGCCAATTAAGTCTTTGCT  
TCTCGAGTAAAGGATACCGACTATTGCTTTTATCAGAGGTCGCTCTAGGTCAGTGTAAAT

GAGCTACTAGAGGCCAATCCCGAGGCAGAAGAATTACTTCGGGGCAAACATAGCACTAAG  
GGCCTGGGCAAGATGGCTCCCAGTCTGCCTCCTTTATCACCTGAACGGGAGTACGGTA  
CCCTTAGGACCAGCAAGTGACACAGGAATTCTGAATCCAGAAGGTTATACCCTCAACTAC  
AATGAATTTATTGTCTATAGCCCCAACAGGTCCGTATGCGGTATCTTCTAAAGGTTCGG  
TTTAATTTCTGCAGCTGTGG

>Pig\_PARP2

ATGGCTGCGCGGGAGAGGGACCTGCAGCCGCCGACGCGAGCATTAAATGAAGCTGCA  
AAAATTAATGGCAAACAGCTACAGAAGACTCCTCCTGCAAAGAAAATTCGAAGATGT  
CAGAGGCAGCAGGTGAAAAGGGAGCCTGTGGCTGGAGGAAAGGCTGACAATGACAGGACA  
GAAGACAAGCAAGAGTCTGTGAAGACCTTGCTGTAAAGGGCAAAGCTCCAGTGGACCCA  
GAGTGACAGCCAAGGTGGGAAAGGCCATGTATACTGTGAGGGGAATGATGTCTATGAT  
GTCATGCTAAATCAGACCAATCTCCAGTTCAACAACAACAAGTATTATCTGATTCAGCTG  
TTAGAAGATGATGCCAGAGGAACCTCAGTGTGGATGAGATGGGGCCGAGTTGGGAAA  
ATGGGGCAGCATAGCTTGGTGGCTTGTTCAGGGGACCTCAACAAGGCCAAGGAAATCTTT  
CAAAAAAATTCCTTGACAAAACAAAAATAATTGGGAGGATCGTGAGAAGTTTGAAAAG  
GTGCTGAAAATATGATATGCTACATATGGACTATACCACCAATGAACAGAGTGAAGAG  
GAAACAAAAAAGAAGAATCTCTAAATCTCCCTGAAACCAGAGTCACAGCTAGATCTT  
CGTGTACAGGAGCTGATAAAGTTGATCTGTAACGTCCAGGCCATGGAAGAGATGATGGTA  
GAAATGAAATACGATACCAAGAAAGCCCCACTTGGGAAGCTGACAGTGGCACAATCAAG  
GCAGGTTACCAGTCTCTTAAGAAGATTGAGGATTGTATTCGGGCTGGCCAGCATGGACGA  
GCTCTTGTGGACGCGTGCAATGAATTTACACCAGAATCCACATGACTTTGGACTCCGT  
ACTCCTCCATTAATCCGGACAGAGCAAGAACTCTTAGACAAATTACAGCTACTAGAGGCT  
TTGGGAGACATTGAAATTGCCATTAAGCTGGTGAACAGAACTGCAAAGCCCAGAACAC  
CCATTGGACCAGCACTATAAAAACTACATTGTGCTTTGCACCCTTAGACCATGAGAGT  
AACGAATTCAAAGTGATTTCCAGTACCTACAGTCTACCCATGCTCCACACACAGTGAC  
TATACCATGACCTTGCTGGATGTTTTGAAGTAGAGAAGGAGGGGGAGAAAGAAGCCTTC  
AGAGAGGACCTACCTAACAGGATGCTGCTATGGCATGGTTCCAGGCTGAGTAACTGGGTG  
GGAATCCTGAGCCACGGGCTTCAATTGCCACCTGAAGCTCCATAACAGGTTACATG  
TTTGAAAAGGAATCTACTTTGCTGACATGTCTCCAAGAGTGCTAATTACTGCTTTGCC  
ACTCGCCTAAAGGATACTGGACTGCTGCTCTTATCAGAGGTAGCTCTAGGTCAGTGTAA  
GAGCTATTAGGGGCCAATCCAGAGGCAGAAGGATTACTTCAGGACAAGCATAGCACCAAG  
GGGCTGGGCAAGATGGCTCCCAGTCTTACGTGCCATCACCTTGAATGGGAGTACGGTG  
CCCTTGGGACCAGCAAGTGACACAGGAATTCTGAATCCAGAGGGTTATACCCTCAACTAC  
AATGAGTTTGTGTCTATAACCCCAATCAGGTCCGTATGCGATACCTCCTAAAGGTTCAA  
TTTAATTTTCTGCAGCTGTGG

>Platypus\_PARP2

ATGGCGGCTCGCCGCCGACCGGGAGGAACGGGGCCCTCGAAGGGCGGAATTAGAGGTG  
TCCCCGTGCCCGCAGGGCGGCCAGGGTCGCACGACGGGCTGCGCTGGGAATGGCAGGAC  
CGAGGGGGCTCCTGGCGCCTCTACGCCCCGCGCTGGACATGGACATCTCCCGAGCTTTC  
AGGGCAGGAGACAGTCTGGTGAGCATCTCACCCGATGGGGGAGACACAGAAGTGAAGTG  
GACCTGAAGAGGATGGTCCAAAGAAACGTGCAGACCGGAATGGAGCAGCGGATCGCCGT  
GCAGTAGGAGGGCCCGCTCCTATTACATCTGGCAGTGGCAGGAAGAGGAGGAGTGGGTC  
CCATACCTCCCGAAACCTGCCTGGCTCTGGAAGCAGCCCGGGAGGGAGGGGGCGGCAGC  
AAACCGAAGGTGGACCTAGCAGTCGGCCGACCCGCTACACCCTGGACCCAGGCAACATG

CTGCAAACCAACCGCAGGAGTGGCTTCCAGCGCCAGATGGAGCGTCGGCCCTCGGTTGCT  
GTGGAATTAAGTGGAGCCGGAGGTTCCAGTGACATCTCATTGGCGGACGGGCCCCCTGTG  
GTCAAGAAAAGCCCGTGGGCGCCAGCAGCCAGGAAGGCCCGCGGATGCCAGCGGTAGGAAA  
CAAAGGCAGTGGCAGGAGCAGATGCAAAGGAGATGCCAGAGAAGGAGAGAGCAGTGAG  
GCTGTGAAGACCTTGCTTTTGAAGGGGAAGGCTCCAGTGGATCCAGAGTGCACAGCCAAA  
CTGGGCAGGGCCCATGTGTACTGTGAAGGGGACGACGTGTATGACGTCATGCTGAGCCAG  
ATCCAGCTGGCTGGCCGGCCGGCCGGCCTGCCTGCGCCCCACCTCCATCCAGAGAAACCC  
TGCCCTTTGCCCTCTCCTCGCATTGTTCTCTGCTGCGGCAATGGGCGGGGGGCCAGGCC  
GCACAGACCAAAGGTGGAGGGAAGAATTGCCTGGCGGTGACCCTGAAGCCTGGGCAGATT  
GAC

>Rabbit\_PARP2

ATGACGTTAGATCTCCATGGCGGCGCGGCGGCGGGCGGCTTCCAGCCGCGGCGCTCG  
AGGGTCTTTATTGTTCACTCTTGTCTTAGCTTCTGTAGCAGTAAATGAAACCAATTCA  
GTCACCGAAGACTCTCCCCGTCAAGAAAACCTGAAGATGCCAGAACTAGAGATGAAA  
AAGGAACCTTCGGCTGGAAAAAGGCTGATAAGGAGGGGACAGAAGACAAGCAAGGTGAA  
TCTGTGAAGGCCTTGCTGATAAAGGGCAAAGCTCCTGTGGACCCGGAGTGACAGCCAAA  
GTGGGAAAGGCTCATGTGTATAGTGAAGGAAATGAGGTCTATGATGTCATGCTGAATCAG  
ACCAATCTCCAATTCAACAACAACAAGTACTATCTGATTCAGCTATTAGAAGATGATGCC  
CAGAGGAACTTCAGTGTGGATGAGATGGGGCCGAGTTGGGAAAATGGGGCAACACAGC  
TTGGTGGCTTGTTCAGGTGACCTCAGCAAGGCCAAGGAAATCTTTCAGAAGAAATCTTT  
GACAAAACAAAATAATTGGGAGGACCGGAAAAGTTTGAGAAGGTACCTGGAAAATAT  
GATATGCTACAGATGGACTATGCCCCAATACTCAGGGTGAAGATGAAACAAAAAAGAG  
GAGGCTCTTAAATCTTTGAAACCAGAGTCACGGCTGGATATTCGGGTGCAGGAGCTGATC  
CAGCTGATCTGTAACGTCCAGGCCATGGAAGAGACGATGATAGAAATGAAGTATGATACC  
AAGAAAGCCCCCTTGGGAAACTGACAATGGCACAATCAAGGCAGGTTACCAGTCTCTT  
AAGAAGATTGAGGATTGTATTCCGGCTGGCCAGCATGGGCGAGTTCTCTTGGAAGCTTGC  
AATGAATTCTATACCAGGATCCACATGACTTTGGACTCCGTACCCCTCCATTAATCCGG  
ACAGAGAAAAGAATTATCAGATAAAGTACAGCTACTGGAGACTTTGGGAGACATTGAAATT  
GCCATTAAGTGGTGAAGACAGAGCTACAAAGCCCAGAACACCCATTGGACCAACACTAT  
AGAAACCTACACTGTTCTTGCACCCTCTAGACCATGAAAGTCATGAGTTCAAAGTGATT  
TCTCAGTACCTACAGTCTACCCATGCTCCTACACACAATGACTATACCATGACCTTGCTG  
GATGTTTTTGAAGTAGAGAAGGAGGGTGAGAAAGAAGCCTTCAGAGAGGACCTTCATAAC  
AGGATGCTGCTGTGGCATGGATCCAGGCTGAGTAACTGGGTAGGAATCCTGAGCCATGGG  
CTTCGAATTGCCCTCCTGAAGCTCCCATCACAGGTTACATGTTTGGAAAAGGAATCTAC  
TTTGCTGACATGTCTTCCAAAAGTGCCAATTACTGCTTTGCCTCTCGCCTAAAGAATATA  
GGACTGCTGCTTATCAGAGGTAGCTCTCGGGCACTGTAATGAATTACTAGAGGCCAAT  
CCTAAAGCAGAAGGATTACTTCAGGGCAAACACAGCACCAAGGGACTAGGCAAGATGGCT  
CCCAATCCCACCTCCTCCATCACCTGAATGGGAGTACAGTGCCATTAGGACCAGCAAGT  
GACACAGGAATTCTGAATCCAGAGGGTTATACTCTCAACTACAATGAGTTTATTGTCTAT  
AATCCCAACCAGGTCCGTATGCGGTACCTTCTAAAGTTCAAGTTAATTTCTACAGCTC  
TGG

>southern\_platyfish\_PARP2

ATGAGGAGAACCAGGGGTTCCAGAAATAAAAGCCAGAGTACCGTAGAAAACGAGGAAGTC  
CCGACAAAGACAGTGTGGCAGTGGAAAGGAGATGACGGGCAGTGGGAACCGTACCCAGAT

GAAGCGGGCTCCATGCTGGACTCAGCTTCCTCATCAGGAAAGACATCGGTCACTCTGACT  
CTTGGCGCAGGGAAGAAATATGAAGTTGATCTGAAGAAAATGGTCCAGATTAATCCTACG  
ACAAAGTACAAGAGAAAAGATTCGCTCTCAGATAGTAAAACTGAGAGTTTAAATGAAGCC  
GGTGACGTGGCGGCTGAAAATGGAGATTCAAGTCAAAGAGGAAGAGGAAGAGGAG  
GAGACAGCGGAGCAGCCGGCAGCTAAGAGGAGAAGAGGACAGAGGAAGAGTGCAGCAAAA  
ACCAAAGAAATGCCTAAAGAGGATATAAAAACTGAAGAGGTGGTGAGGACGGTGGTGATG  
AAGGGCAAAGCTCCAGTGGACTCTGAATGCAAAGCTAACTGGGAAAGGCTCATGTTTAC  
AGTGAAGGAAATGATGTTTACGATGTGATGCTGAACCGACCAACCTGCAGTTCAACAAC  
AATAAATATTACCTGATCCAGCTGCTGGAGGACGGCGGCCAAGGCTTACAGCGTCTGG  
ATGAGATGGGGCCGAGTGGGTAAAGTGGGTGAGAACAGCCTCACACCCTGCGGGGCGAGAT  
CTGCTGAAAGCCAAAGACATCTTCAAGAAAAAGTTCTTGATAAGACAAAGAACGAGTGG  
GATCACAGGGAATGTTTTGAGAAAGTAGCCGAAAATATGACCTGGTGTTTCATGGACTAC  
GCCGCTAACGAGAAGGAGGAGAACATCACACAGTCGACGTCGCGCCAGAAAACAGCCC  
TCCAAGCTGGAAGCGAAGCTCCAGTCGCTCCTCGAACTCATCTGTGACCTCAGAGCCATG  
GAGGAGTGTGTGCTGGAGATGAAGTTCGACACCAGAAAAGCTCCTCTTGAAAGCTGACC  
TCGGAGCAGATCCGCGCCGATACGAAGCCCTGAAGAGAATCGAGTCGTGCTTGAAGAAG  
AAGGGAAGCAATAAGGAGCTGCTGGAAGCCTGCAACCAGTTTTACACCCGTATCCCGCAT  
GACTTTGGGTAAAAACGCCTCCAGTGATTCGCTCAGAAGAAGAACTGAAGGAAAAAATT  
GCTCTGTTGGAGGCGCTGAGTGACATCCAGATAGCAGTGAAAATGGCCGAGTCCAATGCA  
GACAGTGACGAGCATCCTTTGGACAGACAGTATCACGCCCTGCAGTGCCAACCTGGAGCCT  
TTGGACCAGAGCAGCCATGAGTTCAAGGTGATAGAACGGTACCTGCAGTCCACTCACGCT  
CCCACTACTCCGACTACACCATGAAGGTCTGGACGTCTTCTCAGTGGACCGGGGCGGC  
GAGAGCGACAACCTTCTGTCTCATTTACACAACAGGACTCTGCTGTGGCACGGCTCCCGT  
CTGTCTAACTGGGTGCGGATCCTCAGTAAGGGCTCCGAGTGGCGCCGCTGAGGCCCC  
GTCACCGGCTACATGTTTGGTAAAGGGATTTACTTCGCAGACATGTCGTCAAAAAGTGCC  
AACTACTGTTTCGCAACCAGAGCCACCATGTTGGATTGCTGCTGCTGAGTGAGGTGGCT  
TTAGGGGACAGTAACGAGCTGCTGGACGCCGACTATGAGGCCATAAGTTGCCTGCAGGA  
AAACACAGCACCAAGGGCTGGGTGTGACCGGACCCGACCCAAAAAACGCCGTACGCTC  
AACGGAGCGACGGTCCGATGGGTCCCGCGTTAAAACGGGGGTTTCTAACTCCAACGGC  
TACTCTGCTCTACAACGAGTTCATCGTTTACAACCCGGCTCAGACCCGGATGAGGTAC  
CTGCTGCGGATCCAGTTAACTACTCCTCTCTCTGG

>Taiwan\_habu\_PARP2

ATGAAAAGGAAACGAAAAGGCTCCCAAAGTCCAGCCTGCCGATGCAGGGACCCAGCCTGCA  
CTGCGCTGGGAGCGCGAGATCAGTGACAACAAATGGCAGATCTCCACCTGGACAGAGT  
GAGGCCCTGAGCCAAGCCACTCGGGTGCAGAAAAGTACAGAAGATTTGGGGAAGACATT  
GTGGACCTGTGCAAGATGGTGGAGTGAACAAGCAGAGCGGTGAGGAGAACCGTGTCCGT  
GTGGCTGTCTGGGATCAGAAATCTATTTGGTCTGGCAATGGGAAGGAGACCAAGAAAAC  
GGCTGGATCCCATACCCCGCTGCTACCTGCTTGGATTTACAGGCAGCCAAGAACGGTAC  
CGGGAGCCCATAGTGGACTTGACAGTTGGTTCGGACCCGCTACAAGCTGGACACGGACCGC  
ATGGTGCAGAGAAACCAGCGGACTAAATTTGAACGTGAGATGGAATGCAGGGAATCAGAT  
GCAACAGAGGCTGCGGGCGGATCCAGCTGAACAGCCGTGACTTGGACGCCAGTACGGCG  
GTTCTCCTAAGAAAGTCCCAGACCGAATTAGATGCCCCAGCATCGCATGGGGAAGGAGAT  
GGGCTGGGAGACGACATTTACGACGTGATGTTAAATCAGACAAACCTTCAATTCAACAAC  
AATAAATACTACCTCATACAACCTGTTGGAAGAAGACAATGCACAGAACTACAGCGTCTGG

ATGCGCTGGGGGCGCGGAAAGCCAAAGACATCTTCACCAAAAAGTTCCTAGACAAAACC  
AAAAACGAATGGGACAAACGGAACAGCTTCCAGAAAGTCTCAGGCAAATACGATCTCCTT  
CATCTGGACTACGAAGCCAGAGATGCTAAGAATTCAGCAGAAGCTGCCCTGAGAAGACA  
ATCTCTAAGCCCAAGCCAGTTTCCAGCTGGAGCCACGGGTGCAGGCTTTGCTAGAGCTG  
ATATGTAATATTCGACGATGGAGGAGATGGTGATCGAGATGAAGTACGACACCCGGAAA  
GCTCCACTAGGAAAGCTGACAGCTGAGCAGATCCAGGCAGGGTACCGGTCATTACAGAAA  
GTGGAAGCATGTCTGAAGCGGAGTCAGACTGGTGCTGCCCTGCTGGAAGCTTGCAATGAA  
TTCTACACACGGATCCCCATGACTTCGGGGCTGAAAACACCACCACTAATAAAAATCTTTA  
AGGGAACTCCAAGAAAAGGCACAGCTGCTGGAGGCTCTCAGTGAGATCCGTATTGGCATC  
AAACATGTGCAGTCAGAACAGTTGGATCTGGAGCATCCTTTGGACCGGAGCTACAGGAGT  
CTCGACTGTGAACTCCAGCCCTTGAAAAGGCCAGTGATGTTTTCCAGGCTCATGTTTAT  
TGTGAAGGAGACGACATTTACGACGTGATGTAAATCAGACAAAACCTTCAATTCAACAAC  
AATAAGTACTACCTCATACAACTGTTGGAAGAAGACAATGCACAGAACTACAGCATCTGG  
ATGCGCTGGGGGCGCGTGGTAAGCCTGGCCAGCACTCCCTCGTGCCTTGCTCTGGAGAT  
TTAGCGAAAGCCAAAGACATCTTCACCAAAAAGTTCCTAGACAAAACCAAAAACGAATGG  
GACAAACGGAACAGCTTCCAGAAAGTCTCAGGCAAATACGATCTCCTTCATCTGGACTAC  
GAAGCCAGAGATGCTAATTCAGCAGAAGCTGCCCTGAGAAGACAATCTTAAGCCCAAG  
CCAGTTTCCAGCTGGAGCCACGGGTGCAGGCTTTGCTAGAGCTGATATGTAATATTCGG  
ACGATGGAGGAGATGGTGATCGAGATGAAGTACGACACCCGGAAGGCTCCACTAGGAAAG  
CTGACAGCTGAGCAGATCCAGGCAGGGTACCGGTCATTACAGAAAGTGGAAGCATGTCTG  
AAGCGGAGTCAGACTGGTGCTGCCCTGCTGGAAGCTTGCAATGAATTCTACACACGGATC  
CCCCATGACTTCGGGGCTGAAAACACCACCACTAATAAAAATCTTTAAGGGAACTCCAAGAA  
AAGGCACAGCTGCTGGAGGCTCTCAGTGAGATCCGTATTGGCATCAAACATGTGCAGTCA  
GAACAGTTGGATCTGGAGCATCCTTTGGACCGGAGCTACAGGAGTCTCGACTGTGAACTC  
CAGCCCTTGAAAAGGCCAGTGATGTTTTCCAGTACTGGAGCGCTATTTGCTCTCCACC  
CATGCTCCCACCAAGGATTACACAATGACTCTGGTCGAGGCCTTTGAAGTGAACAAG  
AAAAGCTCAGAAGCCACTTTCCGTTTTGACCTGTCCAACAGGATGCTGCTGTGGCACGGA  
TCTCGCTGGGGAAGTGGGCGGGGATTTGAGCCAGGGGTTGCGTGTGGCACCACCAGAA  
GCACCCATCACGGGCTATATGTTTGAAAAGGCATTTACTTCGCGGACATGTCCTCTAAG  
AGTGCCAATTAAGTGTGTTTCCACTCGCGAGAAAGACATCGGCCTCCTCTGCTGTGAGAG  
GTTGCGCTAGGAGAGTGCAATGAACTGTTGGAGGCCGATCCAGAAGCAGAACGACTGCCA  
GCCAGCAAACACAGTACCAAAGGCTTAGGCAAATGCTCCAGCCAGTTGTGTTTCTCTG  
CATGATGCAACTGTTCCCTGGGCCAGCTGTAGAAACTGGGATAGCAAACCTCGTGGC  
TATACCCTGAATTACAATGAATTCATTGTCTATGACCCCTGCCAGGTGCGTATGAAATAC  
CTTCTGAAGGTGCGCTTCAATTTGTACAGCTGTGG

>Tetradon\_PARP2

ATGCTTCAGATTAATCCTGTGACCAAGTACAAGAGGAAGATTCGTTCACAAATCAAGGAG  
GAAGAGGAGGAAGAAGATACAAATAAGCAACCTGCTGCTAAGAGGAGGAGAGGACAGAGT  
AAGAGTCAAACAAAATGTGAAGAAATGCCTAAAGAGGAGATAAAAAGCAAAGAGGTGGTA  
AAGACATTGGTCTGAAGGGAAAAGCTCCAGTGGACTCTGAATGCAAAGCCAAGCTCGGA  
AAGGCTCATGTTTACAGTGAAGGAAATGATGTGTATGATGTCATGTTAAACCAGACAAAC  
CTTCAGTTAATAATAACAAATACTACCTGATGCAGCTGCTGGAAGATGATGGATCTAAA  
CTTTACAGTGTGTGGTTTAGGTGGGGGAGAGGGCATTAGTGGGGAAAAGTGGGTCAAAC  
AGTCTGACAGAATGTACTACAGACCTGAACAAAGCCAAAGATATCTTCAAGAAAAAGTTC



TTTGACAAGACTAAAAATGAGTGGGAACGTAAAGACCAGTTTGAAAAAGTAGCTGGAAAA  
TACGACATGGTGTATTATGGACTACAGCACAGAGGAAAAGGAAAAGAAACACTCTGTGGTG  
GAGACTAAAAAACAGGCCTCCAAGCTGGATGTGAAGATACAGTCGCTATTGGAGCTAATC  
TGTGACCTTAAAGCCATGGAGGAATGTGTGCTGGAAATGAAGTTTGATACGAGAAAAGCT  
CCACTTGGTAAATTGACGCCGGAGCAGATTCGTGCAGGTTACGTGGCTCTGAGGAAAATT  
GAGGACTGTTTGAAAAAAAAGGCCAGCCATCGTCAGCTGTTGGAAGCATGCAACCAAGTTC  
TACACTCGTATCCCTCATGACTTTGGGTTGAAAACCTCCTCAATTATTCAAACGGAACAA  
GAGCTAAAGGACAAGATTGCACTTTTGGAGGGCGCTGAGTGATATACAGATTGCCGTCAA  
ATGGTAAAAGCCAACGAAGACAGTGATGAAAATCCTCTGGACAGACAGTATCGCGCCCTC  
CAGTGACAGACTGCAGCCCCTGGACGCCGGCTGCCACGAGTACGAGGTGATTGAAAAGTAC  
CTCCAGTCTACTCATGCTCCACCCATTAGACTACACCATGAGCGTGCTGGACATCTTC  
GGAGTTGACAGGGAAGGAGAGAGTGACAGCTTCTCTCAGACTTACCAACAGCCTACCA  
AGGACCTTGTGTGGCATGGGTCCCGTCTGTCTAACTGGGTTGGCATCCTGAGTCAGGGC  
CTCAGAGTAGCTCCACCTGAAGCTCTGTACCCGTTACATGTTTGGAAAAGGCATCTAC  
TTCGCTGACATGTCATCCAAAAGTGCCAACACTACTGTTTTGCCAACAGAGTAACCAAGTC  
GGATTGCTGCTGCTGTGTGAGGTTGCCCTGGGTGACAGCAACGAGTTGTTGGATGCAGAC  
TATGAGGCCAACAAATCTGCCTAATGGGAAACACAGCACCAAGGGCCTTGGACGGACTGGA  
CCTGACCCCAAAAACGCTCTCACTCTAGAGGGTGTGACTGTACCAATGGGTCTGGAGTA  
AACACGGGGGTGGGTAAACATAAAAGTTATACCCTTCTTTACAACGAGTTTGTAAATTAC  
AACCTGCCCAAATTCGAATGAGGTATCTGCTGCGGATCAAGTTCAACTACTCCTCACTG  
TGG

>Tibetan\_frog\_PARP2

ATGTCTGGGCGCAGGGGCTCAGGCAGGGAGCGCAGGCCCGCGCAGTGTCAGGAAAGAGG  
AAAGCTGAGGCAGATTCTGAGCCAGAAGTTGTTATAAAGACTGAACTTGAAGATGTGAGT  
GTTGCATCTGCCAATCTGGAAAAGTCATAGCTAAATCTGCTGTAAAGTCTGAGCTAGTG  
ACCCGCTGGGAATGGCTGAATGATGGAGACATGTGGATGGTTTATGCTGCTGAGCTTAAC  
AGACAAATTAACCAAGCACTCGGCAATGGGAAACAAAGCTTAACACTCTCACCAGCCGTA  
GGCGTGTCTCTGCAAGTGGATTTAGGAAGATGATCCAAAAAATACAAAGAGTGGTTAC  
CAAAGACAAATACGTCTTGCAGTCAAGGAACAGGACCAATATTTTGTATGGCAGTGGAAG  
TCAGATGATGATTACTGGGTCTCCTATGATGCCAAAACCTGCGTCTTGCTGGAGTCTGCA  
CTGCAGGATGATGAAAAGCATGTGTCCTAAGTTTGGGTGGCAGACCTTACACAGTTGAT  
CTTGGAGCTATGGTGCAGAAAAATACCCAGACTCAGCATGAGCGAGAGATTGAGCGTTGT  
TTATCTGTTGCTGTAGATCAAGGAAGTGACGAGCCAAAACAAAGTGTCCCTAATGGACCA  
ACTTCTCAAACGTCCTCCGAAGGAACAAAAGTGTAGAAATCGTGGAAACTGAAGAGGAC  
AGCAAAGAACAAGTGAAAACCTCTGGTTTTAAAAGGTAAAGCTCCGATTGATCCAGAATGT  
TCCAGCAAATTTGAAAGGCTCATGTGTTCTGTGAAGAAGATGATGTATATGATGTTATG  
TTAAACCAGACTAACCTGCAGTTTAATAACAATAAGTACTACCTGATCCAGCTGCTTGAA  
GATGACGGCGCTAAACGTTTCTCTGTCTGGATGCGCTGGGGACGAGTGGGAAAGGTGGGT  
CAAAATTCTCTGTTTTATATGGAGGAGACCTTCAAAAAGCAAAGGACGTATTTGAGAAG  
AAGTTTTTCGATAAGACCAAGAATGTTTGGTCAGAGCGTGGAAATTTGAAAAGGTTTCT  
GGTAAATATGACATGTTGCATTTGGATTATAACACAACCACGGAGGAAGAGAAAAATGTT  
GTGGAAGTTGACAAGCTATCTGACATTCCAAACCTGAATGCAAACCTGGACAACCTGGTT  
CAGGCCTTGATCCAATTATCTGTAACATGCAGAACATGGAAGATACTGTGCTAGAGATG  
AAGTATGACACAAAGAAGGCACCTCTGGGAAAGCTCACTGTGGATCAGATCCATGCGGGG

TACAGCTCCCTGCAACGTATTGAGAACTGTATTAACAACAAAAGTTTGGCAAACATCTT  
CTTGAAGCCTGCAATGAATTTTACACCAGAATTCCACATGATTTCCGACTAAAGACACCC  
CCATTAATCAGGACAGTAGAGGAGCTGGCTTTGAAAAGTGCGACTACTAGAAGCTTTGGGT  
GACATTCAAATTGCAGTGAAGCTGGCAAGTATGGATCTCGGCTCCCATGAGCACCCACTG  
GACAGGCATTATCGGCAGTTACAATGCTCACTGGAGCCTTTGGGTAAAACATCAGATGAA  
TTCCAGCTTATTGAGTGTACTTGGAAAACAACGCATGCCTCTACTCATAATGATTACACT  
ATGACCTTAATGAATGTTTTCCGGCTAAAAAAGAAGGTGAGGAGAGCAACTTCCGAGCA  
GAACTCCCAACAGAATGCTTCTGTCATGGATCTCGTCTGTCTAACTGGGTTGGCCTC  
CTTAGCCAAGGTCTGCGTGTGGCTCCCCAGAAGCCCCAGTAACAGGGTATATGTTTGGC  
AAAGGAATTTATTTTGGCTGATGTCTCTCAAAGAGTGCAAATGACTGCTTACCTCTCGT  
GATAAGAATGTGGGAATTCTTCTACTTTGTGAGGTGGCCCTTGGTAACTGTAATGAGCTT  
ATAGCTGCAGATTATGATGCTCAGAAACAATTGAAGGGAAAACACAGCACAAAAGGTGTT  
GGCCGTAGTATCCAGACCCACAGAAGTCTATCAAACATGAAGGAGCAATGGTTCCGATG  
GGGCCCTGATCGACACAGGACTACAGAATAATGATGGCTATACACTAAATTACAATGAG  
TACATTGTGTATGACTCTTGTGTCAGGTACAAATGAAGTATTTGCTGCAAGTAAATTTCAAC  
TATGAATCTCTGTGGTAA

>Tilapia\_PARP2

ATGAGGCGAGCGAGAAGTTCGCGAAATAAATGTGAGAGTGCACCAGAAAATGGAGAAGCC  
CAGTCAAAAACAGTGTGGCAGTGGATGGGAGATAAAAGACAGTGGGAACCATACTCTCCA  
TCAGCCTGTGCCGTCTTGGACTCGGCCGTCTTTCGGGAAAACATCTGTCACTCTCTCT  
CTGGGCTCGGGGACAGCCTATGAAGTTGATCTGAAGAAGATGGTTCAGATCAATCCTGTC  
ACAAAGTACAAACGGAAAATTCGCTGTCAGACTGTAAAAACAGAAAGTCAGAATGAAGCT  
GGTGACGTTGCTGCTCATAATGAGAAACCAGCTCAAGTTAAAGAGGAAGAGGAGGACACA  
GAAGAGCAGCCTGCAGCTAAGAAGAGGAGAGGACAAAGCAAGAGCCAGACAAAAACTGAA  
GAAATGCCCAAAAAGCCAAAGAAGAAGTAAAAAGTGAAGAAGTTGTGAAGACAGTGGTC  
ATGAAGGGAAAAGCACCAGTAGACTCTGAATGTAAGCCAAACTAGGAAAAGGCTCATGTT  
TATAATGAAGGAAATGATGTTTACGACGTGATGCTAAACCAGACAAATCTTCAGTTTAAAC  
AAACAACAATATTACCTGATCCAGCTGCTGGAGGACGACAACCTCAAGGTTTACAGTGTG  
TGGATGAGATGGGGCAGGGTGGGTAAAGTAGGTCAAAACAGCCTTACGGCCTGTGGTGGAA  
GACCTGCTGAAGGCCAAGGACGTCTTTAAGAAAAGTTCTTTGAGAAGACCAAGAACGAG  
TGGGAGCATCGAGATAGTTTGGAGAAAGTAGCTGGAAAATATGACATGGTGTATGAGAC  
TACAGCACGAATGAAAAGGAGGAGAATCAGACCACAGTGGATACTAAACAAAAAAGAAG  
ACCTCTAAGCTGGATTTAAGGATTCAGTCTCTCCTGGAGCTCATCTGTGATCTGAAAGCC  
ATGGAGGAGTGTGTGCTGGAGATGAAGTTTGACACCAAGAAAGCTCCTCTTGGCAAGCTG  
ACCCAGAGCAGATCCGAGCAGGTTACTCAGCACTGAAGAAGATCGAGGATTGCTTGAAG  
AAGAAGAAAAGGGAGCAATCGTGACCTTTTAGAAGCATGCAATCAATTTTACACCCGCATC  
CCACATGACTTTGGGTTGAAAACCTCCACCACTTATCCAAACAGAAGAAGAGCTGAAAGCC  
AAAATTGCCCTTTTGGAGGCACTGAGTGACATCCAGATAGCAGTAAAAATGGTCAAGTCC  
AGTGAAGACAGCGATGAACATCCTCTGGACAGACAGTATCACTCCCTCCAGTGCAAACCTG  
CAGCCTCTGGACTCCAGCAGCAACGAGTACAAGGTGATAGAGAAGTATCTGCACACCACT  
CACGCCCCCACCCTGCGACTACACCATGACTGTGCTTGACATTTTCTCAGTGGACAGA  
GGCGGGGAGAGCAACAGTTTCTGTGACAGTTAAGTAACAGGACTCTGCTGTGGCACGGT  
TCACGTCTGTCTAACTGGGTCAGCATCCTCAGTCAGGGACTTCGAGTGGCCCCCCTGAA  
GCTCCTGTACTGGTTACATGTTTGGTAAAGGTATCTACTTTGCTGACATGTCATCCAAA

AGTGCCAACTACTGCTTTGCCAACCAAGCAACAACGTTGGACTGCTGCTACTGTGTGAA  
GTCGCTCTGGGAGAATCTAATGAGCTGCTGGATGCGGACTATGAAGCAAACAATCTGCCT  
GCTGGAAAGCACAGCACCAAGGGGCTGGGACAGACTGGACCTGACCCAAAACTCTGTG  
ACACTGGACGGTGTGACTGTGCCGATGGGGCCTGGCGTGAAGACGGGAGTGGGTAAATGT  
AACGCTTACTCCCTCCTCTACAACGAGTTCATCGTTTACAATCCTGCACAGACTCGCATG  
AGTTTCACCTCCTCCCCAGGATGTAGAGGAAAATTAGGACTACATCTAGGTAGATTC

>Worm\_PARP2

ATGTCTATAATCAACGACGAAAATGGAAGAGGCTATAAAGTACATCTTTGCAAGACGAAT  
ATTGCACAGAACAACAATAAATTTTACGATATGGAATTGTTGGATGAGGGAGGTGATTC  
ATTGTGAAGCTTATCAATGGACGTATTGGATATCGTGGTGTACACAATTAAGATTTT  
GATGACCTCGACAGAGCCAAGAAGTTCTTCGAAAGCAAATTCTACGAGAAAATCATCTT  
CATTGGGAAGAAAGAGACGATGAACCGGTTCCAATAAATATGCAGTCGTTGAGTTGGCT  
ACTAACGCAAGACAGACTGAAAAGAAGTTAAAAGGAGGAACCGAACCTGAGCCGAAA  
GTTGATGAGAAAATACACGTGGAAGGAAGAAAAGAGGAATTGTTAAAGAAAAGAAAGAA  
ATCAAGAAAGAAGAGGAACCAAGTTGAAGAAGTTAATGAAAAGCTGAAGGAATTGATGAAA  
TGCATCTGCGACGAAGATGTTTCATCTGGGACTCTTGAAACAATGAAATTTAACGAAGCT  
TTTGAAGACCAATTGATTGCCTCTCACTTGCCCACTCACCCTGGATATGAAATTTT  
AGTAAGATTGAGGAATCGATTGGAGGAAAATCAGCTCGAAGATCTACTCGTGCCGCGCA  
CGAGTAGCTGACCGTGTCTTGCTGTTAAATCCGATGGTCCATCTCTTACGACATCAAC  
AAATATTATTCTCTCATCCCTCATTGTTGGTTTCTGTGTTCTCCAAAAATTGATTCT  
CATGCTAAAATTCAAGCTGAACGAGAGCTTCTGGATGCACTGAAAGGATCAATTGAAGCA  
TCACTGGAAGTGAAGGATTTGAAAAGACAGCATCGTCGAAGGATTTTATCAAAGACTT  
TATGAGCGCCTCCCGTGCCATTTGGAGCCAGTTTCGGAAGAAATTGCAGGAAAATTGGA  
GACTGCTTGGCTATGCGTGGACCCACTCATTGTTACAAGCTTCACTCATTGATGCATT  
GAGTTAAAGGATCCAAATGAAATTCCAAGTCCAGTTGAAGTTCAGGAAGTTCCG  
AAGAAGAGAGGACGAAAGAGCACAAGACCGCTGCTCCAAGTGTCCACCACCACTACA  
AAACGCCTTCTTTGGCACGGTACTCGTGTGACAAATGTCTTCTCAATCCTCATGAATGGA  
CTTCAGTTCCAGTTGGAGATCGCTGTGGTCTGATGTTTCGGAATGGAGTTTATTTGCA  
AATGTTCCAATAAATCCGCGAATTACTGTTGCCAGAGGCTTCAAAGAGAGTTTTCATG  
CTTCTTTGCGAGGTTGAACTGCGAACCCATTAGTTCTCTACGAGTCAGAAATTGACGCG  
GATGAGAAAATGGAAGGACGAAAAGACGTGCGTTTATGCAGCTGGAAAGCACACTCCA  
AGAGACTGTTGAAATCAATGGAATCCCGCATTCAAGTCAAATCTTGAGACAATCGAA  
GAAGAAACTCGTCTTCTACGATGAATATGTGATGTTCAACAAGGAACACTTCAAATA  
AAATATGTTGTCGAAGTGAAGTGGATCGTCTTACCGCTAAGGAAATGATGGCT

>Zebrafish\_PARP2

ATGCGACGAACAAGGAGTTGCAGGGACAAGTCTGTGGCAGATTCAGGCAGTGAAGCTTCA  
GAGGCGAAGACGGTTTGGCAGTGGAAGGGGATGAAGATGAATGGGAACCGTATCCTTCA  
GAGGTCTGCAACAGCTGGATGCAGCAAAGCAGGCTGGTGAAGTCTGTTTCGCTTGC  
CTCGGACCTGGTTACGTAGTGGATCTTGTGAAAATGACTCAGACTAATACTGTCAGCAAG  
TACAAACGAAAATACGCCTTCAGAAAAGTGAAGTCAAGTCAATGAAGGGAATGCTTTG  
AATGGTAATAAAAAAGCAACAGGTGTTGTTTCAGATTAAGAAGAAAAGAGGAGGAAGAG  
GAGCAGCCCGTTTCCAAGAAGAGACGCAATGAAGGGAGGAGTCAGAAAGCGAACAAAGAC  
AAACCTGTGGTAAAAGAAGAATGTGAAGTTGTGAAGACTGTTTATGAAGGGCAAAGCC  
CCTGTTGATCCAGAATGCAAGGCTAAATTGGGAAAGGCACATGTCTACAACGAGGGTGTCT

GATGTGTATGATGTTATGCTTAATCAGACTAATCTCCAGTTCAACAATAACAAATATTAT  
CTGATCCAACCTCTTGAAGATGACAGTGCAAAAGCCTACAGTGTGTGGTTGAGGTGGGGA  
CGAGTGGGCAAAGTAGGACAGAACAAATCTGGTTAGCTGTGGGGCAAATCTAGCTCAGGCC  
AAAGACACCTTCAAAAAGAAATTTTTGACAAGACCAAGAACGAGTGGGAGCATCGAGCA  
AGTTTTGAGAAAGTTGCAGGAAAATATGACATGGTATTTATGGACTACAGCACTGAAGAC  
AAGGGAGAGGAGAAAGCTGTGGTCCCTCTGCTACTCAAAAAAGCCTTGCCAACTGAAC  
AGCAAGGTCCAGTCTCTCCTAGAGCTCATTTGTGATCTCAAAGCCATGGAGGAGTGTGTG  
CTGGAGATGAAGTTTGACACCAAAAAAGCCCCACTCGGAAAATAACAGCAGAGCAAATT  
CGTGCTGGCTATGCCTACTGAAAAGAATTGAGGAGTGTAAAGAAGAAAGGGAGTAAC  
AAGGAGCTTTTGGATGCATGCAACCAGTTTACACCCGCATCCCTCATGATTTTGGGTTG  
CGGACACCCCAATAATTCGCTCAGAGGAGGAGCTGAAGGAGAAAATTACTTTGCTCGAG  
ACTCTAAGTGACATTCAGATAGCGTTAAAATGGTTCAGTCTAATGTTAAGAGTGACGAG  
CATCCTTAGACAGACAGTATCACTCTTAACTGCCAACTGCAACCACTGGATACTGAC  
AGCAATGAATACAAGTTATAGAGAAATATCTCAAGTCCACCCATGCACCCACCCATACT  
GACTACACAATGACTCTTCTGGATGTCTTTGCTGTGGAACGAGAGGTCGAGAAGGACAAC  
TTCAACTCTGAGCTGCAAAACAGGATGCTCCTGTGGCACGGCTCTCGTCTGTCAAAGTGG  
GTGGGGATCCTGAGTCAGGGTCTGCGAGTGGCCCTGCAGAGGCTCCTGTGACTGGATACT  
ATGTTTGGTAAGGGGATCTATTTGCGAGACATGTCATCCAAAAGTGCCAATTACTGCTTT  
GCCAGTCAGAAGAACAACCAGGGACTCTTGTGCTGAGCGAGGTTGCCCTGGAGATAGT  
AATGAACCTTTGGACGCAGATTACAATGCCGACCAACTGCCTTCTGGGAAGCATAGCACA  
AAAGGTCTGGGTCAAAGTGCACAGACCCCAAAAATCAGTTTCATTGAATGGTGTGACT  
GTGCCCTGGGACCCTCTGTGAAGACCGGTGTTGCCAGAAAGGAGGATACTCTCTTCTT  
TATAATGAGTACATTGTTTATAACCCTGCTCAGATTCAGATGAAGTACCTCCTTAGAGTT  
CAGTTAACTTCTCATCACTTTGG

>central\_bearded\_dragon\_PARP2

ATGGGACGGAAACGCAAGGGCTCCGAAGCCCAGACTGGGGAGCCCACTGCTGCGGGGGCT  
GATCTGGAAGTGCCTGGGAGTGGGAGACCGGAGGCAACCGGTGGCAGCAGTTTACGCCCT  
GCGCAGAGTGAGGTCCTGAGCCAGGCAGCTCGAGCGGGGAAGGTTTCGGCAGACCTCGAG  
GATGCCTGCGTGGACCTCCGAGGATGCTGCGGAGGACAAACAGACTGGGGAGGAAACC  
CGCGTGGCCACCGCTGTCCGAGAGCAGGATTCCTACTTTGTCTGGCAGTGGCAAGGGGAT  
CAAGAAGGCGACTGGGTTGCTACCCGGCGGACACGTGCCTGGCCTTGCAGGCCGCCAGG  
AATGGTCAGGGGGAGCCTACGATCCACATGACCGTCGGCCGGACACGCTACAAGCTAGAC  
ACGACCCGCATGGTGCAGATCAACAGCCGGACTGGCTTCGAGCGCCAGATGGAAATCAGA  
GAGTCAGATGCTGCAGAGGCTGAGGAGGAAGGATCCAGCGGGGTGACAGTGTCTTGAGT  
GCGGAAGCTGCTGTTCTACGAAGAAGATTGAAGCAGAGTCGATGCCCCAGTGCCTCAG  
GGAGACGGGGATAGCACAGAGACTGTGAAGACGCTGATCGTGAAAGGGAAGGTACCTGTG  
GACCCAGAATGCACTGCTAAGCTGGGAAAGGCTCATGTTTATTGTGAAGGAGATGACATT  
TATGATGTGATGCTGAATCAGACGAACTTGCAAGTTCAACAACAACAAGTACTATCTCATC  
CAGTTGCTCGAGGATGATGGAGCACCAAACACTACAGCGTATGGATGCGCTGGGGGCGCGTG  
GGTAAGCCCGGTCAGCATTCACTCGTGGTTTGTGCTGGAGATTTGGCTAAAGCCAAAGAT  
GTCTTACCAAAAAGTTCTGGATAAAACCAAGAATGAGTGGCTGAAGCGTGCTAACTTC  
CAAAAGGTCCCAGGGAAATACGATATCCTTCATCTGACTACGAAGCCAATGACGCAGGC  
AAGGAAGAAGGTGCGTCCCAGAAGGCAGTCTGTTCCAAGCGGGTGTCACTGCTGGAGCCT  
CAGGTGCAGGCCTTGGTGGAGCTGATCTGCAGTATTCGCACCATGGAAGAGATGGTGATG

GAGATGAAGTACGATACCAAGAAGGCCCTTTAGGGAAGCTGACGGCCGAACAGATCCGC  
GCCGGCTACCAGTCTCTGCAAAAGGTGGAGGCGTGTCTCAAGCAGAAGCAGACGGGCCGC  
CCCTTGGTAGACGCTTGAATGAATTCTACACTCGGATCCCCACGATTTTGGGCTGAAA  
ACTCCCCACTGATCAACACGGATCAGGCGTTGCGAGAGAAGACGCAGCTGCTAGAGGCC  
CTCAGCGAGATTGCGATTGGGATCAAAGCAGTGCAGTCAGAACAGCTGGACCAGGAACAT  
CCACTTGACCGGAGCTACCGTGGGCTGGGCTGCGAGATCCAACCCTTGAAAAGGACAGT  
CCAGACTTCCAGGTCCTAGAACGCTACCTGTCGTCCACTCATGCTCCCACTACCGGGAT  
TACACAATGACCCTGCTGGAAGTCTTCGTGTTGAACAAACAGAGTGCCAGTCCGGGGCTCC  
GTCTCCGCTCCGACCTGCCAACAGGATGCTGCTATGGCACGGGTCCCGTCTGGGCAAC  
TGGGCGGGGATTCTGAGTCAGGGTTGCGGGTGGCGCCGCCGAGGCCCCCGTACGGGA  
TACATGTTTGGAAAGGAATCTATTTGCCGACATGCTCTCAAGAGCGCAACTACTGC  
TTCGCGACCCGTGAGAAAGACGTCGGCCTGCTGTTGGTCTCGGAGGTGGCTCTGGGGCG  
TGCAATGAACTGCTGGAGGGGACTCCCGAGGCAGAGACTTTGCCGCCTGGCAAAAACAGT  
ACCAAGGGGCTCGGCAAATGGGCTCCATCGCCCGCAACAGCGTCACACTGCATGGAGCA  
GTGGTTCCATGGGCCCTGCTGTGAAACTGGGGCGGTGAACCCCATGGTTACACACTG  
AACTACAATGAGTTCATCGTCTATGACCCTTGCCAGGTGCGGATGAAATACCTCCTCAAG  
GTGCGCTTCAATTTTACACCGCTCTGG

>spotted\_gar\_PARP2

ATGGACGTCGGGCGTGTGTGCGGGAGGGGGGCGTGTGCTGTTAAGAATCACTCTGCTCAT  
TGCCCTGCTGTGTGCTCTGTGCCCCAGAGGTGGTGAAGAGGGTGGTGTTCAGGGGAGG  
GCTCCCGTCGACGCTGAGTGCAAGGCCAAACTGGGCAAGGCCATGTGTACTGCGAGGGA  
GAGGATGTCTATGACGTCATGCTGAACCAGACAAACGTCCAGTTCAACAACAACAAGTAC  
TACCTGATCCAGCTGCTCCAGGATGACGGGCCGAGGTCTACAGCGTGTGGATGAGATGG  
GGCAGAGGTACTAGCCTGTTCTTCGACAAGACGAAGAACGAGTGGGAGGACCGCTCCCG  
TTTGAGAAAGTGGCGGGAAATACGACATCGTGACATGGACTACAGCACCGAGGAGAAG  
TTTGTGTTGAGAGCAGCAGGAAAAGCTACATCTTGATCTCTCATCACATCTTGCTCTGC  
TCACTGTCCCTCTCCTTGTCTGTGTTTAGGTTACGCACCCACCCCTCATTGCTCTGAG  
CAGGAGCTGAAGGAGAAGATCGCTCTGCTGGAGGCCCTCAGTGATATCCAGATTGCGGTG  
AAGATGGTCCAGTCCAGTGCAGTGGTGTGATGAACACCCCTGGACAGGCAGTACCACACT  
CTGTGCTGTGAGCTGGAGCCCATGGAGCCAGTCCAGGAATACCAGCTGCTGGAGCGC  
TACCTGCAGTCCACCCACGCTCCACTCACAGCGACTACACCATGACCGTGTGGACATC  
TTCACCGTGAACAGGAAGGGGGAGGAAGAGGCCTTCTGCTCACACCTGCACAACAGGACT  
CTGCTGTGGCATGGCTCCCGTCTCTCAAACCTGGGTGCGGATTCTGAATAAGGGGCTGAGA  
GTGGCTCCACCAGAGGCACAGTCACTGGGTACATGTTTGGAAAAGGAATCTACTTTGCG  
GACATGTCATCTAAAAGTGCGAACACTGTTTTGCCAACAGAAGAACAGCACAGGACTG  
CTGCTGCTCAGTGAGTGCCTGGGGGACTGTAACGAGCTGCTCCATGCCGATTACAAC  
GCGGACAAGCTGCCGCCCGGAAAGCACAGTACCAAGGGCTTGGGCCAGACCGCGCCGGAC  
CCCAGGAACCGGTGGCGCTCGACGGGGTGGCGTGGCCCTGGGCCCGCCGTCCGGACT  
GGGGTGGCCAACGAGCAGGGCTACACCCTGCTCTACAACGAGTTCGTCTGCTACGACCC  
AACCAGGTGCGCATGAGGTTCTCCTCCGGGTGCGCTTCAACTACCCCTCGCCGTGG

>guppy\_PARP2

ATGAGGAGAACCAGAGGTTCCAGAAATAAAGCCAGAGCGCCGTAGAAAACGAGGAAGTC  
CCGACAAAGACAGTGTGGCAGTGGCAAGGAGATGACGGGCAGTGGGAACCGTACCCAGAT  
GAAGCGGCTCCATGCTGGATTGAGTTCCTCATCAGGGAAGACGTCGGTCACTCTGACT

CTTGGCGCAGGGAAGAAATATGAAGTTGATCTGAAGAAAATGGTCCAGGTTAATCCTACG  
ACAAAGTACAAGAGAAAGATTCGCTCTCAGATAGTAAAAGAAGAGAGTTTAAATGAAGCC  
GGTGTATGTGGCGGCTGAAAATGGAGATTCAAGTCAAGAGGAAGAGGAAGAGGAG  
GAGACAGCGGAGCAGCCGGCAGCTAAGAGGAGAAGAGGACAGAGCAAGAGTGCAGCAAAA  
ACCAAAGAAATGCCTAAAGAGGAAATAAAAACTGAAGAGGTGGTGCAGGACGGTGGTGATG  
AAGGGCAAAGCTCCAGTGGACTCCGAATGCAGAGCTAACTGGGAAAGGCTCATGTTTAC  
AGTGAAGGGAATGATGTTTACGATGTGATGCTGAACCAGACCAACCTGCAGTTCAACAAC  
AATAAATATTACCTGATCCAGCTGCTGGAGGACGACGGCGCCAAGGCTTACAGCGTCTGG  
ATGAGATGGGGCCGGGTGGGTAAAGTGGGTGAGAACAGCCTCACAGTCTGCGGGGAGAT  
CTGCTGAAGGCCAAAGACGTCTTCAAGAAAAGTTCTTGATAAGACAAAAGAACGAGTGG  
GATCGCAGGGAAAAGTTTTGAGAAAAGTAGCCGGAAAATATGACCTGGTGTTTATGGACTAC  
GCCGCTAACGAGAAGGAGGAGAACATGACCACGGTGGACGCCGCCAGAAAAGCAGCCC  
TCCAAGCTGGACGCGAAGCTCCAGTCGCTCCTCGAACTCATCTGTGACCTCAGAGCCATG  
GAGGAGTGTGTGCTGGAGATGAAGTTTCGACACCAGAAAAGCTCCTCTTGAAAGCTGACC  
TCGGAGCAGATCCGTGCAGGATACGAAGCCCTGAAGAGGATCGAGTCATGCTTGAAGAAA  
AAGGGAAGCAGTAAGGAGTTGCTGGACGCCTGCAACCAGTTTTACACCCGGATCCCGCAT  
GACTTTGGGTAAAAACGCCTCCAATGATTCGCACAGAAGAAGAACTGAAGGAAAAAATT  
TCTCTGTTGGAGGCGCTGAGCGACATCCAGATTGCGGTGAAAATGGCCGAGTCCAATGCA  
GACAGTGACGAGCATCCTTTGGACAGACAGTATCACGCCCTGCAGTGCCAACTGGAGCCT  
GTGGACCAGAGCAGCCACGAGTTCAAGGTGATAGAACGGTACCTGCAGTCCACTCACGCT  
CCCACTACTCTGACTACCCATGAAGGTCCTGGACGTCTTCTCAGTGGACCGGAGCGGC  
GAGAGCGACAACCTTCTGTCTCATTTACACAACAGGACTCTGCTGTGGCACGGCTCCCGT  
CTGTCCAACCTGGGTGGGATCCTCAGTAAGGGCTCCGAGTGGCGCCGCTGAGGCCCCC  
GTCACCGGTACATGTTTGGTAAAGGTATTTACTTCGCAGACATGTCGTCAAAAAGTGCC  
AACTACTGTTTTGCCAACCAGAGCCACCATGTTGGACTGCTGCTGCTGAGTGAGTGGCT  
TTAGGGGACAGTAACGAGCTGCTGGACGCCGACTATGAGGCCCAAGCTGCCTGCAGAA  
AAACACAGCACCAAGGGCCTGGGCTGACCGGACCCGACCCAAAAAACGCCGTACGCTG  
AACGGAGCGACGGTTCGATGGGTCCCGCGTTAAACGGGGGTTTCTAACCCCAATGGC  
TACTCTGCTCTACAACGAGTTCATCGTTTACAACCCGGCTCAGACCCGGATGAGGTAC  
CTGCTGCGGATCCAGTTAACTTCTCCTCTCTCTGG

>common\_starling\_SIRT1

ATGTTAGGTACAGACCCACGGACGATTCTGAAGGACCTGCTGCCAGAAACCATCCCCC  
CCTGAACCTGGATGACATGACTCTGTGGCAAATCGTGATAAACATCCTTTCAGAGCCACCA  
AAAAGGAAGAAAAGGAAAGATATCAACACCATTGATGATGCTGTGAAACTTTTGCAGGAG  
TGCAAGAAGATCATGGTGTGACTGGAGCTGGGGTGTGAGTGTCTTGTGGAATACCTGAC  
TTAGATCCAGAGATGGCATCTATGCACGCCCTGCTGTAGACTTCCCAGACCTTCCAGAT  
CCTCAAGCAATGTTTATGATTTGAATACTTCAGGAAGGATCCCAGGCCGTTTTTAAAGTTT  
GCAAAGGAAATCTACCCGGGACAGTTCCAGCCGTCTCTGTGCAAGTTCATCGCTTTG  
ATGGATAAAGAGGGCAAACCTTCGCAACTCACTCAGAACATAGACACACTGGAGCAG  
GTGGCAGGAATCAAAGGATAATCCAGTGTGATGTTTCTTGGCAACAGCTTCTGCCTG  
ATCTGTAAATACAAAGTTGATTGTGAAGTTGTCGAGGAGATATTTTCAATCAGGTGGTG  
CCCCGCTGTCCCGCTGTCCCCCGAGGAGCCCTGGCTATCATGAAGCCCGACATTGTG  
TTCTTTGGGGAGAACCTGCCGAGCAGTTCCACCGTGCCATGAAGTACGACAAAATGAA  
GTGGATCTCCTCATTGTCATTGGGTCTTCGCTCAAAGTAAGACCAGTAGCATTGATCCCA

AGTTCATCCCCATGAAGTGCCTCAGATCTTAATTAATAGGGAACCTTTGCCTCATCTA  
CACTTTGACGTGGAGCTTCTCGGAGACTGTGACGTTATAATTAATGAATTGTGTCAGAGG  
TTGGGTAATGAATACACAAAACTTTGCTACAACCTCGGTGAACTTTTCGGAAATCACAGAA  
AAGCTCCACGGCCGACAAGGAGCTCGAAGCGCTCTCGGCTGAGCTCCCACCAACCCCT  
CTGAACATTTCAGAAGGCTCCAGTTCACCAGAAAGGATGAGCCACCTGATCCTGCAGTG  
GTGGCACAACCCACCTGAATGTAAGGTAGAAAAGTGTGAGCCTGCCTCGGAAACTAAA  
GGGACCTGCTCCGAGGAGACCCTTCAGGACACGCAGGTGTCATCAGAAAACCTGAAAAT  
CCTGCTAGTGAGCTAATGAACTCTGAAACAATGAAGGAAAATGGATCTAATGATGGAGAA  
AATAAAGAAAAGAGTGAAATACTGAAGAAGTGTGGGTAACAGATCTGCAAAGAACAG  
ATTAGCAAAGGCTGGATGGTACTCAGTATCTGTTTCTGCCACCCAGTCGCTATATCTC  
CATGGTGCTGAGGTGTAAGGATGACATCATATCTCCAGCTCTTGTTGGC  
AGCAGCAGTGAGAGCGGCTCGTGCCGAGTCAGAGCTTAGATGTGGAGGATGAGAGTGAG  
ATGGAGGAGTTCTACAATGGCTTAGAGGATGAGGATGCTCCCGAGAGGGAAGAGGAGGAT  
GGAGCCGAACAGGAGGAATTGGCAGCTGAGGAAGGAGCTGACACAAACGAAGCTGCAGGG  
ACGGAAGAGCCGAGCAAGGCGCTG

>central\_bearded\_dragon\_SIRT1

ATGGCGGATGAGGAGACGCCACTCTCCAGTCCCGCAGCGGCGGCCGCGGCAGCAGCAAC  
GGCAGTGTGGCGGCCCGGTCGCAGAGAGCCCAGAGCCAGCTCTCAAGCGGCCGCGCCGG  
GGCCCGACTGACAGCCCCGGGCCGACTGTGAGACCGCGAGAGGAGCCCGCCGGAGAGGCA  
GAGACGGCGCTCCCGCAGGAAGCACCCGCGAGGAGGAGGAGGAAGAGGCCCGGAAG  
GTGGAGGAGGTTGCTGCCGCCCGCCGCTGTTGTTGCCGCCCGCTGCGGAGTCGGGA  
GAGGTTTCAGCGGCACCCGGGAGACAAAGCGGCGGCGAAGGCTGGGACTGCGCAGAGAGT  
GGGATGTATGTTGACTGTGATAATATATTTTTAGTGATGAAATCATTGCAAACGGCTTC  
CATTCTTGAGAGTGATGAAGATGACAGAGCTTCTCATGCAAGCTCTAGTGACTGGACT  
CCACGGCCACGTATAGGTCCATATACTTTTGTCCAACAGCATCTCATGATAGGCACAGAT  
CCCCGTGCAATTCTGAAAAGATTTGTTACCAGAAACAGTTCCTCCCCCTGAACTGGATGAT  
ATGACATTATGGCAAATCGTTATTAATATTCTGTGAGAACCACCTAAAAGAAAAAAGAGG  
AAAGATATTAATACGTTAGAGGATGCTGTGAAACTCTACATGAATGCAAAAAAATAATT  
GTCTTGACTGGAGCTGGGGTGTCTGTGTCTTGTTGGAATTCCTGACTTCCGGTCAAGAGAT  
GGTATCTATGCACGCCTTGCTGTGGATTTCCAGATCTCCTGATCCTCAAGCAATGTTT  
GATATTGAATACTTCAGGAAAGATCCAAGGCCATTTTTTAAATTTGCAAAGGAAATATAT  
CCTGGACAGTTTCAACCATCTCTGTGCATAAATGTATGGCTTTGCTGGATAAAGAAAAA  
AAACTGCTTCATAATTACACAGAACATAGATACAATGGAACAAGTTGCAGGAATTCAA  
AGGATAATCCAGTGTATGGTTCATTTGCAACTGCTTCTTGCCCTATTTGAAATACAAA  
GTTGATTGTGAAGTTGTTGAGCAGATATTTTTAATCAGGTTGTTCTAGATGTCCAGA  
TGTCCACCTGATGAACCACTTGCCATCATAAAGCCAGAAATAGTGTCTTTGGTGAAAAT  
CTGCCTGAGCAGTTTCATAGGGCCATGAAATATGACAAAGATGAGGTTGATCTTCTTATT  
GTTATTGGGTCTTCACTTAAAGTAAGACCGGTAGCATTAAATCCAAGTTCCATCCCACAT  
GAAGTGCCTCAGATTTAATTAATAGGGAACCCTTGCCCTCATCTACACTTCGATGTGGAG  
CTTCTTGTTGACTGTGATGTTATTATCAATGAGTTGTGTCATAGATTAGGTGGTGCATAT  
GCAAACTTTGTAACAGTTCAGTCAAACCTTTCAGAAATTGCAGAGAAACCTCCACGACCA  
CTCAAAGAATTTGAAATACATTGAGTTGAGTTACCACCTACTCCGCTAAACGTTTCTGAA  
TATTCTAGTTCACCTGAGAGAATTATCCCACAAGATTCTCAGGTAGTACGTTCCAGAGCAT  
TCTTCCGAATTTAAAGTAGGAGATTGAGAAGTTGCCTTGAATCTAAAGAGTACTGTATG

GAGGAAAAGTCACATGAGGTACAAAAGTGTGGTTAGAAAACACTGACAGTCTTCCTGGCCAG  
TTAGAAGACCCAGAACATGTGAAGGAACATGGATCTAACCAAGGAGAAAATAAAGATAAA  
AGTGAAAAAACATCTGTTGAAGCACTGAGAAAATGTTGGGTTAACAAATGTCCAAAAGAG  
CAGATCAGCAAGCGTCTTGATGGTACCCAATACTGTTTGTACCACCAAATCGGTATATA  
TTCCATGGTGCTGAAGTATTCTCGGACTCAGAAGATGATGTCATATCCTCCAGCTCTTGT  
GGAAGTAGTAGCGATAGTGGGTCCTGTCATAGTCCAAGTTTAGACATAGAAGATGAGAGT  
GAAATTGAAGAATTATATAACGGCATAGAAGAAGATGCACCTGATAGGGAAGATGAGAAT  
GGATTTGGGGAAGATGGAATCAAGACTCTGTGGATGTGTCAGTTCTGTAAATGAGTCT  
GCAGGATTTGACCATTGCGCAGACAAAAGT

>Gecko\_SIRT1

ATGGCGGACGAGGAGACGCCACTCCTCCAGCCCCGGAGCGGGGGCCGCGGCGGCACCAGC  
TGCGTCGCGGCCGCGCCTCCAAGAGCCCTGAGCCGCCTCTCAAGCGCCAGCGGCGGGAC  
AACATATTTCTTAGTGATGAAATTATTGCAAATGGTTTCCATTCTGTGAGAGTGATGAA  
GATGACAGAGCCTCTCATGCAAGCTCTAGCGACTGGACTCCAAGGCCACGTATAGGGCCC  
TACACTTTTGTTCACAACATCTCATGATAGGCACAGATCCACGTGCGATTCTGAAAGAC  
TTGTTGCCAGAACTATTCTCCCCCTGAACTGGATGATATGACACTGTGGCAAATAGTT  
ATAACATTCTGTCTGAACCACCTAAAAGAAAAAGCGGAAGGATATTAATACTATAGAG  
GATGCTGTGAAACTCTGCAAGAATGCAAAAAAATTATTGTTTTAACTGGAGCTGGGGTA  
TCTGTTTCTTGTGGAATTCCTGACTCCGATCTAGAGATGGTATCTACGCACGCCTTGCA  
GTGGATTTCCAGATCTTCCGGATCTCAAGCCATGTTTGACATTGAATATTTCCGAAAA  
GACCCAAGGCCATTTTTAAGTTTGCAAAGGAAATATATCCTGGACAGTTTCAACCATCT  
CTCTGTCATAAATTTATAGCGCTGATGGACAAAGAAAGAAAAGTCTTCGCAATTATACT  
CAGAATATAGATACTGGAACAAGTTGCAGGAATCAAGGATAATCCAATGTCACGGT  
TCCTTTGCAACAGCTTCATGCCTAATCTGTAAATACAAGGTTGATTGTGAAGTTGTTCTG  
GAAGACATTTTTAATCAGGTTGTTCTAGGTGCCCCAGGTGTCACCTGACGAACCCCTT  
GCCATCATGAAGCCAGAAATAGTATTCTTTGGTGAAAATCTACCTGAGCAGTTTCATAGG  
GCCATGAAATATGACAAAGACGAAGTTGATCTTCTTATTGTTATTGGGTCTCTCTCAA  
GTAAGACCAGTAGCATTGATTCCAAGTTCCATCCCCATGAAGTGCCTCAGATTCTAATT  
AATAGGGAACCGTTGCCTCATCTACACTTTGATGTGGAGCTTCTTGGTGACTGTGATGTG  
ATTATAATGAATTATGTCATAGGCTGGGTGGCGAATACACAAAACCTTGTAAACAGCTTG  
GTCAAACCTTTCAGAAATAACAGAGAAACCTCCACGAGTGCACAAGGAACTTGAATACAC  
TCTGCTGAGTTACCACCAACTCCTCTAAACATTTCTGAATATTCTAGTTCACCTGACAGA  
ATGGTGCCACAAGATTCTCGGGTGGTACTCAGAGCCTTCTTTTGAATATAAAGCAGGA  
AATTCTGATGCTGCCTTGGTGTCTAAAGAGAAGTGTCTAGAAGGGAAAGAATGACATT  
CAAAATTCTCTAGAAAATGCAGAAGGTTACTGACCAGTTAGAAAACCCAGAACATGTA  
AAAGAAAATGGATCTAACCAAGGTGAAAACAAAGAAAGAATTTATCTGTTGAAACACTG  
AGAAAAAGTTGGATCAACCGATGTGCAAAGAGCAGATTAGCAAGCGACTTGATGGTACT  
CAATACTGTTTTTACCCCCAAATCGCTATATCTCCATGGTGCTGAGGTATACTCAGAC  
TCTGAAGATGATGTCATATCCTCCAGCTCTTGTGGAAGCAGCAGCGATAGTGGGTCCTGT  
CATAGTCCAAGCTTAGACATAGAAGATGAAAGTGAATGAAGAATTCTATAATGGCATA  
GAAGATGATGATGCTCCTGACAGAGAAGAGGAGAATGGGGAAGATGGAACCTGACCTTCAA  
GAATCTGTTGATGAGTCAGCTTCTGTAAATGAGGCTGTAGGACCTGATCATCAAACAGAC  
AAGCTG

>Taiwan\_habu\_SIRT1



ATGCCACTCCTCATTGCGGAGCGGGCGGCCGCCGCGGCAACAACAGCAACGGCGCCGTG  
GCGGCCGCTGACACCGAGAGCCCCGAGCCCGCTCTCAAGCGCCAGCGCCAGGCTTCGGCT  
GAGCAGAGCTGCGCGGCGGGCGGGCGGGGGGAAGCGGCGAAGCGGCGGACGCGGGCG  
CCTCTCCGAGGAAGGGCTGTCTGAAGAGGCCCTGGAGGCGGACAGGGCGGTCCCCGCCCG  
TGTGTCAGCGGCGAGCCGGGCGAGGTGCCGCGCCGCGGGGGCAGGAGAGGGCTGGAAC  
TGCGCGGAAAGCGGGGGCCGGTGGTGGGGCCTGGCCGAGAGGAGCCGCCCGCCGCTCG  
CCGCACCAACAGCAGCAGCTGCCGCCGCGGGGGCAGAGCCAAGAGGAGGGCGCGGAGGCG  
GCGCCCGCCGAGAGCCAGCGGAGACGGCCATTGGCTGCGGGCCGGCGCAGTCTTCGAAC  
GGCGCGGCTGAGGCGGAGAGGGCGCCGAAACCGATAATATATTTTTAATGATGAAATT  
ATTGCAAATGGCTTCCACTCTTGTGACAGTGATGAAGATGATAGAGCCTCTCATGCAAGT  
TCCAGTGATTGGACTCCAAGGCCACGGATAGGTCCATACACTTTTGTCCAACAACATCTC  
ATGATAGGCACAGATCCACGGGCAATTCTGAAAGACCTATTACCAGAAACCATTCTCCT  
CCTGAAGTGGATAATATGACGTTATGGCAAATTGTCGTTAATATTCTCTCAGAACCACCA  
AAAAGGAAAAAAGAGAAAAGATATTAATACTATAGAGGATGCTGTGAAACTCCTGCAAGAA  
TGCAAAAAAATAATTGTGTTGACTGGAGCTGGGGTATCTGTTTCTTGCGGTATTCTGAC  
TTCCGATCAAGAGATGGTATATATGCACGCCTAGCAGTTGATTTCCAGATCTTCCTGAT  
CCTCAAGCAATGTTTGACATAGAATACTTCAGAAAAGATCCAAGGCCATTTTTCAAATTT  
GCAAAGGAAATATATCCTGGACAGTTTCAGCCATCTCTTGTGATAAATTTATGCTTTA  
ATGGATAAAGAAAGAAAACCTTCGCAATTATACTCAGAATATAGATACTGGAGCAA  
GTTGCAGGAATTCAAAGAATAATCCAGTGCCATGGTTCCTTTGCAACTGCTTCTTGCCCTC  
ATCTGTAAATACAAGGTTGATTGTGAAGTTGTACGAGGAGATATTTTTAATCAGGTTGTT  
CCTAGATGTCCAGATGTTACCTGATGAACCCCTTGCTATCATGAAGCCAGAAATAGTG  
TTCTTTGGTGAAAATCTACCGGAGCAGTTTCACAGGGCCATGAAATATGACAAAAGATGAA  
GTTGATCTTCTATTGTTATTGGGTCTTCACTTAAAGTAAGACCAGTAGCATTGATTCCA  
AGTTCCATCCCACATGATGTGCCTCAGATTTTGATTAATAGGGAACCGTTGCCTCATCTA  
CACTTTGATGTGGAGCTTCTTGGTGATTGTGATGTTATTATCAATGAATTATGTCATAGA  
TTGGGTGGAGAATATTCAAAACCTTTGTAGTAGTTCGTTTCAGCTTTTCAGAAATAACAGAG  
AAACCTCCACGGCCTCACAGAGAGTTTGAAAAACATTTAACAGAGTTACCACCCACTCCT  
TTAAACATTTCTGAATCTTCTAGTTCATCTGACAGAATTCATCACAAGATTCTCAGATG  
ATACATTCAGAGCATTCTGGTCAATATAAAGCAGGAAATTCTGATGTTGCTTTGGAATCT  
AAAGAAAACCTCTATAGAAGAAAACCACTAGAAAGTTCACAACTCTTTAGAAAATTCAGAA  
AGTACTCATGGTCAGTTAGAAACTACAGAACACATGAAGGAACCTGGATCTCATCAAGAA  
GAAAACAAAGAACGAAGTGAAAAACCTCTGTTGAAACAGTGAGAAAATATTGCTGGAAT  
AGATGTGCAAAAGAGCAAGTTAGCAAGCGCTTGATGGTACTCAATATTTGTTTTCCCA  
CCAAATCGCTATATTTCCATGGGGCTGAAGTTTATTCAGACTCTGACGACGATGTCATC  
TCCTCCAGCTCTTGTGGAAGTAGCAGCGGTAGTGGGTCATGTCTGAGCCGAAGCTTAGAC  
GTAGAAGAGGAGAGTGAATTGGAAGACTATTACAATGGCATAGAGGAAGAGGAAGAGGAG  
GCAGACACCCCTGACAGAGAAGAGGAGAACGGATTTGAGGAAGAAGGAACGGACCTTCCA  
GAATCTGTTGATGAATCAATTTCTATAAATCAGACAGTAGAATTTGACAGTTCGTCAGAC  
AAGTTG

>green\_sea\_turtle\_SIRT1

ATGATAGGCACAGACCCACGGACAATTCTGAAGGATTTGCTACCAGAAACAATTCCTCCT  
CCTGAAGTGGATGATGACTCTGTGGCAGATTGTTATAACATTTCTTCAGAACCACCA  
AAAAGGAAAAAACGAAAAGATATTAATACTATTGAGGATGCTGTGAAACTTTTACAAGAG

TGCAAAAAATAATTGCTTGGACTGGAGCTGGGGTGTCTGTTTCTGTGGAATACCTGAC  
TTTCGATCAAGAGATGGCATCTATGCACGCCTTGCAGTAGATTTCCAGACCTTCCAGAT  
CCTCAAGCAATGTTTGATATAGAATACTTCAGAAAGGATCCAAGACCATTTTTTAAGTTT  
GCAAAGGAAATATATCCTGGACAGTTCCAACCATCTCTGTGCATAAGTTCATAGCTTTG  
ATGGACAAAGAAGGAAAACACTTTCGCAACTATACTCAGAACATAGACACACTGGAACAG  
GTTGCAGGAATCCAAGGATAATTCAGTGTGCATGGTTCTTTGCAACAGCTTCTGCCTC  
ATCTGTAAATACAAAGTTGACTGTGAAGCTGTTTCGAGGAGACATTTTTAATCAGGTTGTT  
CCAAGATGTCCAGGTGTCCACCTGATGAACCACTTGCCATCATGAAGCCAGAGATAGTG  
TTCTTTGGAGAAAACCTTACCTGAGCAGTTCCATAGGGCCATGAAGTATGACAAAGATGAA  
GTTGATCTCCTTATTGTTATTGGGTCTTCACTGAAAAGTAAGACCAGTAGCACTGATTCCA  
AGTTCCATCCCCACGAAGTGCCTCAGATCTTAATTAATAGGGAACCTTTGCCTCATCTA  
CACTTTGATGTGGAGCTTCTTGGAGACTGTGATGTCATTATTAATGAATTATGTCAAAGG  
CTAAGTGGTGAATATACAAAACCTTTGCTATAACTCAGTAAAACCTTTCAGAAATAACAGAA  
AAACCTTCACGAATGCACAAGGAACCTGAAATGCATTAGCTGAGTTACCACCTACCCCT  
TTAAATATTTCTGAAGACTCTAGTTCACCGAACAGAATTACACCGCCAGATCCTTTAGTG  
GTACCTTCAGTTGGATGCTCTCAGAGTAAGGCAGAAAATTCTGATCCTGCCTCGGAATCT  
AAAGGGAATTGCATGGAGGATAAATTGCAAGAAGCACAAGCATGCTCAGAAAACCTCTGAA  
AGTATTACTGGCCAGTTAATCAACTCAGAACATATGAAGGATAATAGATCTAACAAGGAG  
GAAAATAAAGAGAAAAATGAAATAACTTCATCCGTTGAAACATTGAGGAAATGTTTGGCA  
AACAGATTTGCAAAAGAACAAATTAGCAAGCGGCTTGATGGTACTCAATACTTATTTTTA  
CCACCAAATCGCTACATTTTCCATGGGGCTGAGGTATACTCAGACTCTGAAGACGATGTC  
CTATCATCTAGTTCTTGTGGGAGTAGTAGTGATAGTGGTTCTTGTGCATAGTCCAAGCTTA  
GATGTAGAAGATGAAAGTGAGATTGAAGAATTCTATAATGGCATGGAGGAGGAGGATGCT  
CCAGAGAGAGAAGAGGAGACTGGATTTGGGGAAGATGGAGTGGTTCAAGATGCAGTTGGT  
GAACCAGCTTATATAAATGAAGCTGCAGGAATTGATCGTCCATCAAACAAATTG

>Chinese\_alligator\_SIRT1

ATGTTAGGCACAGACCCAAGGACAATTTGAAAGATCTGTTACCAGAACTATTCTCCA  
CCTGAACTAGATGATATGACACTGTGGCAAATTGTTATAAACATTCTTTCAGAACCACCA  
AAAAGGAAAAAACGAAAAGATATTAATACCATTGAGGATGCTGTGAACTTTTCAAGAG  
TGCAAAAAGATTATGGTTTTGACTGGAGCAGGGGTGTCTGTGCTTGTGGAATACCTGAT  
TTCCGATCAAGAGATGGCATCTATGCACGCTTTCGAATAGATTTCCAGACCTTCCAGAT  
CCTCAAGCAATGTTTGATATAGAATACTTCAGAAAGGATCCAAGACCATTTTTTAAGTTT  
GCAAAGGAAATATATCCTGGCAATTCCAGCCATCCCTCTGTGCATAAATTCATAGCTTTG  
ATGGATAAAGAAGGAAAGCTACTTCGCAACTACACTCAAACATAGATACACTGGAACAG  
GTTGCAGGAATCCAAGGATAATACAGTGTGCATGGTTCTTTTGTACAGCTTCTGTCTA  
ATCTGTAAATACAAAGTTGACTGTGAAGCTGTTTCGAGGAGACATTTTTAATCAGGTTGTT  
CCTAGATGTCCAGATGTCCACCTGATGAACCACTCGCTATTATGAAGCCAGAAATAGTA  
TTCTTTGGAGAGAACTTACCAGAGCAGTTCCATAGGGCCATGAAGTATGACAAAGATGAA  
GTAGATCTCCTTATTGTAATTGGGTCTTCACTAAAAGTAAGACCAGTAGCACTGATTCCA  
AGTTCCATCCCCATGAAGTGCCTCAGATATTAATTAATAGGGAACCTTTGCCTCATCTA  
CACTTTGATGTGGAACCTTCTTGGAGACTGTGATGTAATCATTAAATGAACTATGTCAAAGG  
CTGAGTGGTGAATATACAGAACTTTGCTACAACCTCATAAAAACCTTTCAGAAATAACAGAA  
AAACCACCACGAATGCACAAGGAGCTTGAATGCATTAGCTGAGTTACCACCTACCCCT  
TTAAACATTTCTGAAGACTCTAGTTCACCTGAAAGAGCAACTCCCCAGACTCTTTGGTT

GTGCTCTCAGAGCATCCAACAAAATGTAGGGCAGAAAATTCTGAACTTGCCTCAGACTCT  
AGTGGGAACTGCATGGAGAAATCCAGGAGGTACAGACATCCTCAGAAAATCCTGAAAGT  
ATTACTGGCCAGTTAACGAATTTAGAATCCAAAAGAAAATGGAGCTAACAAATGGAGAA  
CAGAAAGAAAAAATGATATAACTTCATCGGTTGAACTTTGAGGAAATGTTGGCCAAAC  
AGATGTGCAAAAGAACAGATTAGCAAGCGGCTTGATGGTACTCAATACCTATTTTTACCA  
CCAAATCGCTATATTTCCATGGTGCTGAGGTGACTCAGATTCTGAAGATGATGTCTTA  
TCTTCCAGTTCTTGGAAGTAGTAGTGATAGTGGTTCTTGTCATAGTCCAAGTTTAGAT  
GTAGAAGATGAAAGTGAGATTGAAGAATTCTACAATGGCATGGAGGAAGAGGATGCTCCA  
GAAAGAGAAGAGGAAATTGCATTTGGGGAAGATGGTGTGAAGAAGATGCAGTTGATGAA  
TCAGGTTATATAATGAAGCTGTAGGAACTGACCATCCATCAAACAAACTG

>African\_clawed\_frog\_SIRT1

ATGGCGGACTCAGATCGTAGGTTTTCCATTGCCGGCACTGTACTAGCTGTCTCAAAA  
GAAAATGGCGAGCCCCCTTTCTAAAAGGCAGCGCCTGGAAGATACCGGCGGCGGTGGTGGG  
CAGCTTGAGGCGCTGAAAGCGAGGGGAAGGCGGCATTGCCGCCGTAGCTACTTCTTTG  
CAGGAGGAAGGCGAGGCCTCTTCGGCAATGAAAAGCAAATCGAGAGCGCACAATGGCTCG  
GGCTTTCAGGGCCTTCCCTTGAGAAGCGGCAGCTGGGAACATATTTGGTGCAAGGCCAG  
GAGGAGGGAGGAGCCGAGGAGTTACCCAATGGAGACCTGTCGGATCAGGCTATTGATTAC  
GGAGGGAGTATCCATCTGGATGATGATCTTGCTGGCGGCTTTCATTCTTGACAGTGAT  
GATGATGGCGCATCTCATGCCAGCTCAAGTGATTGGGCCCCAGGCCTTGCATAGGGCCT  
TATACATTTGTACAACGGCACTTAATGATGGGAACGGATCCCCGGACAATTCTTAAGGAT  
TTACTCCCTGACACTGTAGCACCATCAGAGTTAGATGATATGACTTTATGGCAAATTGTT  
ATAAACATCCTTTCTGACCCACAAAACGAAAGAAGCGCAAAGACATCAACACTATTGAT  
GATGCTGTGAACTTTTGCAAGAGAGCAAGAAAATAATTGTTTTAACTGGAGCAGGGGT  
TCAGTGTCTTGGAATACCAGATTTTAGATCAAGAGATGGCATTATGCACGTCTTGCA  
GTGGATTTTCCAGACCTTCAAATCCTCAAGCCATGTTTGATATTGAATACTCAGGAAA  
GATCCAAGGCCGTTTTTAAATTTGCTAAAGAGATCTTCTCGCCAGTTCCAGCCATCG  
TTGTGTCACAGATTCATAGCTATGTTGGATAAAGAGGGAAAAGCTTCTTAGAACTATACT  
CAGAATATAGACACACTTGAACAAGTTGCAGGAATTGAAAAGATTATCCAGTGTCATGGA  
TCATTTGCTGAAGCATCTTGCTTGATGTAATACAAGGTTGACTGTGAAGCTGTTAGG  
GAGGACATATTTAATCAGATAGTTCCAAGGTGCCACAGTTCACCTGATGAGCCCCTT  
GCCATCATGAAACCGGACATTGTATTTTTCGGGGAAAAGTTGCCAGAACAGTTTCACAGA  
GCCATGAAATATGACAAAAACGAGGTTGATCTTCTTATCGTTATTGGATCTTCCCTGAAA  
GTCAGACCAGTAGCATTAATACCAAGTTCTATCCACATGAAGTGCCTCAGATACTAATT  
AATAGGGAACCATTGCCTCATCTACACTCGATATAGAAGTCTTGGAGATTGTGATGTA  
ATTATAAATGAGTTATGTCAAAGACTGGATGGAAAATACTCTCAGCTTTGACTAATTTT  
TTAAAATTTTCAAATCACGGAATGCCTCCTCGAATACACAAAGGTTTCTTACTTCC  
CCAGAGACCATCCCATCTACAGACTTAAACACAGGGCAAAGTGTGGAATAAAAAGGGAG  
CTGCATGAAACTGACTTACTAAGTGCTTGAATACAGCATGCTCATTGGAGAAACCTAAG  
GAAGCTTCTAAGCTTCCACACAGTTGACTGATGAAAATCTAGAAGTGTAAAGGAAGTT  
AACACACAAAGTCTCAAAGGTGCATCCAGACTGAAACACAGCCCAGCAATGAGAAAAGAT  
CAAGAAACAAGTATAAAGATACTGACATTGATTCAACCAAGGATTTGGAAAATAAATAT  
ACAAAAGAACAGATCAGTAAGCGCTAGATAGCACACAGTTTTTGTGTTTAGCACCAAT  
CGCTATATTTTTCATGGTGCAAGTGTGTTTTCGGATTCCGAGGAAGAACTGACATCTAGT  
TCCTGTGGAACAAATAGTGACAGTGAATCTTACTTAGTCCAAGCCTGCATGAACCCATT

GAAGAAGAAAGTGAAACTGAAGAATGCTTCCACGCTAAATATGAAAATGAGACTGATACA  
GATAATAGGGCAGATTTAGAGAAAAGAACCCGAGAGGGTTGTACTGTATGAAAGTGATGAT  
CTCCTAGGTAATGGTACTACAATGAATTTA

>Tibetan\_frog\_SIRT1

ATGGCGGACGCGGATCGGCTGGGATTGAATCATACCGGCGATCTCTTCGCTTTGCCGAAA  
GAAAACGGCGAGCCGGCCGCTAAAAAGCCGCGATAGACTCCGCCACGGCGGGCAGCCG  
CTGTACGGCGAGAAAAGAAGGGAGAGCGGGAGCGTCCGGCGAGCCGGGTGTCCCGGAAGAG  
GGGAGGCCTCTGCGGAGGGAGTAGGCAGAGCGCACAATGATAGCTCGCCCCTTTCCGGGC  
CTGTTAGGGGAACAGCGGCACCCAGCAATGCAGGCCGAGCAGGAGCTGATTAATGGAGAC  
CTGGCGGAGCAGGCAGTCGAGTATGGAGAAGATCTCCATCTAGATGATGATCTTGTGGC  
GGCTTTCATTCATGTGACAGTGATGACGAAGATCGAACTCCCATGCCAGCTCGAGTGAC  
TGGACTCCCAAGCCTTGCATAGGTCCTTACACATTTGTTTCAGCGACACCTAATGATGGGT  
ACTGACCCTAGGACCATTCTAACGGATCTGCTTCTGATTCTGTTGCACCACCTGATCTG  
GATGACATGACTCTCTGGCAAATTGTGATCAACATACTGTCAGATCCACCGAAAAGGAAA  
AAGCGCAAAGACATTAATACTATTGAGGACGCTGTCAGACTCCTGCAAGAGAGCAAGAAA  
ATAATGGTGTAACTGGAGCTGGGGTTTCTGTCTCCTGTGGAATCCCAGATTTTCGATCG  
AGGGATGGGATATATGCACGTCTGGCAGTGGAATTTCCCTGATCTTCAAATCCTCAAGCC  
ATGTTTGATATTGAATACTTTAGAAAAGGACCCAAGGCCATTTTTAAATTCGCAAAGGAA  
ATTTTTCCAGGCCAGTTTCAGCCATCTCTGCCACAAGTTTATTGCTATGTTGGATAAA  
GAGGGGAAATTACTTAGAAATTATACTCAGAATATAGACACACTGGAACAAGAAGCAGGA  
ATTCAAAGAATTATCCAGTGTGATGGGTCATTTGCAATGGCCTCTTGTCTAATATGCAA  
CACAAAGTTGACTGTGAAGCTGTCAGAGAGGACATATTAATCAGGTTGTTCCACGATGT  
CCTAGATGTCCACAGGAAGAGCCCTTGCAATTATGAAACCTGATATTGTCTTTTTCCGGG  
GAGAATTTGCCTGAACAATTCCACAGGGCAATGAAATATGACAAAGATGAGGTTGACCTT  
CTTATTGTTATTGGCTCCTCGTTGAAAGTGAGACCGGTTGCTTTAATACCAAGCTCCATC  
CCTCACGAAGTGCCTCAAATTTTGATTAATAGAGAGCCTTTGCCTCATCTTCATTTTGAT  
ATTGAACCTCTTGAGACTGTGACGTATAATCAATGAGCTAAGCCAGAGACTAGATGGA  
AAGTATGCAGAACTCTGTAACGGTTCCTTGACACTTACAGAAATCACAGAGAAACCTCCC  
CGACCAAACAAAGTGCTTTCCATTCTGCTAGATGCACAGTCTAAGGCTTTGGGCACTGGA  
CATGGTTTAACTCCCAAGATGGCCTGGCTCACCCAGAATTACCTTTGACTCCTCCACTT  
GAAGACTGCCTGTGATCAGAAAGTACTCTGAGCTTTCTCAAAGCTGTAAAGGAAATATG  
ACTGTAGACAAACCTGTAAGTGAGACCCCAACCAGCAATAGCGAAGAGCCGGAAAAGTGT  
GACAATGAGAGCAGTATTGATCTGTCCAGGACGAGTTTGTCCAAAATGGCAAAGGAGCAG  
ATAAGCAAACGCCTAGATGGCACACAATATTTATTTCTATCCCAAATCGCTATATTTTT  
CATGGTGCTGAAGTGTCTTCTGATTCTGACGACGACCTGTCATCCAGCTCTTGTGGAACA  
AACAGCGACAGTACTCTTTACAGAGCCAGGTTTACAGGAAGCGGCTGAAGATGACAGT  
GAAATTGAAGATTTCTACCCTATTAATATGATCATGACTCTGATACTGAAAATCGGACA  
GGCTTTGAGGAAGAGCCCGAAGCCGCTGTAATCTATGAGAACAGTGAGATTCTAGGTGAT  
GACAATACAGTCACAAAGTTA

>southern\_platyfish\_SIRT1

ATGGCGGACAGAGAGAACGCTCTCGGAACTGCTTATTCAGGAACCTCTGAGATGGACGAA  
CCTATTGCAAAAAGGTCAAAAATCAATACGGTGACCAACCACGGATCTAGAGCCATAGAA  
ACGGACACAATCTCATGCGTTTTCCGGCCATTGGGAGCCGGGAAGAGGCGGGGAATTGT  
GCCGAGACAGCGGAGAAGAAGGAAGCGAAGCCGGTGATGATGGCGGTGGAGCAGGCCCTG

GCATCGCGAGGCGGGACAACAATGGACTGAGTCTGCCGGTCTCCGAGCCGCACAACTA  
GCTGGGCAATTAGGCGACAGCACCGCCTTTGGTGCAACTGAGGAAGGTGCCGATTTTCTT  
GGACATAACGATCTGCTTCGCAATGGTCTTGCTGTACACCAGAGCACATTGATGAGGAA  
GATGACAGATCTTCACATGCAAGCTCCAGTACTGGACTCCTCAACCGCAAATAAATTCA  
TACAGTTATATACAGCAGCACATCAGAGAGACGGATCCACGGGCCATTCTGAGGGATCTG  
CTTCCTGAAACCATCCTCCCTCCAGACCTGGATGATATGACGTTATGGCAGATAATCATC  
AACATTTCTGAGCTCCAAAAAGAAGAAAACGAAAAGATATCAACACCCTGGAAGACGTG  
GTGAAGCTGCTTCATGAAAGCAAAGGATCCTAGTCCTGACTGGCGCTGGTGTGTCCGTT  
TCATGTGGAATACCAGATTTTCGCTCCAGAGATGGAATTTATGCACGACTTGCTGTAGAT  
TTTCTGATCTTCAGATCCTCAATCAATGTTTGATATTGAATATTTTAGAAGAGACCCT  
AGGCCCTTTTTCAAGTTTGCTAAGGAGATCTCCCTGGTCAGTTCCAGCCGTCGCCCTGT  
CACAGATTTATATCCATGCTGGATAACAAGGGAAGCTGCTTCGCAATTACACTCAAAC  
ATTGATACGTTGGAGCAAGTGGCCGGAGTTCAGCGAATCATCCAGTGCCATGGGTCAATTT  
GCTACTGCTTCGTGCTTGTCTGTAAATAACAAGGTGGATTGTGAGGCGATAAGGGCTGAC  
ATCCTCAATCAGGTCGTCCCCGTTGCCCGGTGTTTGACATTCTCTGGCCATCATG  
AAACCTGACATCGTGTTTTTTGAGAGAATCTCCAGAACTTTCCACAGAGCCATGAAG  
CAGGACAAAGACGAGGTCGACCTTCTGATCGTCATCGGGTCGTCTCTAAAAGTCCGGCCG  
GTGCCCTCATCCGAACTCCATTCCTCATGAAGTGCCTCAGGTTCTGATCAACAGGGAG  
CCGCTGCCTCATCTGAACTTCGATGTGGAGCTGCTGGGCGACTGCGATGGCATCATCAAC  
GAACTCTGCCATCGGCTGGGCGGAGACTTCGAGCAGCTCTGCTTCAACTCTAACCCCTT  
AACGAGATCACAGAGAAACCACCGCGTTAGCAGAGCCGCCCGCCAGATGAGGCTTCC  
ACTGACCCGGCGGACAAACCTCCAGAAGAGACGGAGAGCAAGAATGTCAAGGAACTGTA  
ACGCTGTCCGAGCCTTGTTCGAACGCGGCGAGTCGAAGCGCGGACGACGCCGAGTCGCCG  
GAGCCTCAGAGAGAGGACGTAGCGAAAGACGAGGCGGGCGAGGCGAAGAGCCAAACCTCA  
GTGCTGGACAATCGAAAGCGATACTGGATGAGTCGGGTTCAGCAGGAGTCCAATCAGCAAA  
CGGCTTGAAGGCGGTTCAGTACCTTTTCCAAGCACCGAATCGATATATCTTCCACGGCGCC  
GAGGTCTACTCCGACTCAGAGGAGGACGAGACATCGAGTTCCTGCGGGAGCGACAGCGAC  
GGCTCCGACTGCAGCCAGGACGGCCAGAGGACTGCAGCGAGGCGGAGGACGCGGCCCGG  
CCAGCGGGCGACGAGGCGACCCACAGAGACACGTTACCACTAAACGAAGAGGCCACGCCC  
ACTCTGCAGACGGACTTCACATCAGAACACTCTGAGAGGACCACACATCTC

>spotted\_gar\_SIRT1

ATGGCGGACGGAGAGAATATCCTCCTAAACTCCAGCGCCAGTGGCTTCGAAACAGATGAA  
CCTCTGCCTAAAAAGCCGAAGGTGGGATTGGCGTTAGTTACGGGGATAAGGCCGCTCAG  
ATCGATCAGGAGAGTGGGATCGGGGCCGGCGAGACTGGGGCGGGCTGCCGTAGCACCA  
GCAGCTGCAGCGGTGTCGGCGGCGGCGGACGACACAGCGGCCGGGTTGGAGGAGGTG  
GTGACGGTGGGACAGGCCTCGGCTGCACCAGGAGGAGACAATGGGCTTCTGGGCTTGGAG  
CTGCAGGAGGGGCTGGGGGAGGAGGAGAGAATGATCCGGTCGGCGTTCTGCTGCAGAG  
CGACCAGAGTACATTGATCTCAATGATGAGATTCTGCCCAATGGATTCCATTCTACGAT  
TGCGATGACGATGATGACAGATCTTCGCACGCAAGTTCTAGTACTGGACACCTCAGCCC  
CAGATAGGCTCCTACAGTTTTATTACAGCAACACATTATGAGAGAAACAGACCCTCGAACG  
ATTTTAAAAGACCTTCTCCAGAACTGTTCTTCTCCTGATCTGGATGATATGACACTG  
TGGCAAATAATAATCAACATATCGGAGCCTCCAAAAAGAAGAAAACGCAAAGACATCAAC  
ACCATGGAAGATGTGGTCAGGTTACTGCAAGAATGTAAGAAAGATTATAGTTTTGACCGGA  
GCTGGGGTCTCGGTGTCCTGTGGAATACCTGACTTTAGATCCCGTATGGCATTACGCG

CGGCTTGCATTGACTTCCCCGATCTTCCTGATCCTCAGGCGATGTTTGACATAGAATAC  
TTCAGGAGAGATCCGCGACCCTTCTTTAAGTTTGCCAAGGAGATCTATCCAGGACAGTTC  
CAGCCGTCGCCATGTCATAAGTTCATTGCAATGTTGGATAAGCAGGGGAAGCTTCTTCGA  
AACTATACTCAGAATATCGACACACTGGAGCAAGTGGCTGGAGTACAAAGGATCATACAA  
TGTCATGGGTCTTTTGCAACAGCGTCTTGTTAATCTGTAAATACAAAGTTGACTGTGAA  
GCTATTAGAGAAGACATTTTTAATCAGGTTGTACCTCATTGCCCCAAGTGCCACCTGAT  
TTTCTCTTGCCATCATGAAACCAGACATAGTTTTCTTTGGAGAGAACTTACCAGAACAG  
TTTCACAGAGGCATGAAACATGACAAAGATGAAGTGGACTTGCTGATTGTCATTGGATCT  
TCACTGAAAGTGCAGCAGTGGCTCTTATTCCAAGCTCAATTCCTCATGAAGTGCCTCAG  
ATTCTGATCAACAGAGAACAGCTGCCCATCTGAACCTTGTATGTGGAATTGCTTGGAGAC  
TGTGATGTTATCGTTAATGAACTATGCCATAGGCTAGGTGGAGACTATGAACAACTGTGC  
TACAACCCTTTAAGACTTTTCCAGAGATTACAGAGAAACCCCAAGGCCACAGAGGGAGTCT  
GAACTACAGTTCGCGACCTGCCACCCACCCCTCGAGCTCACTGAAGACTCTGGTTCC  
TGGAACAGACAAGCGAGCCACCCAACTCTGTGGAACTTTGGAAGAATTGACTGGA  
GATCGTTATCGAACAAAGGAGAGCCTACCTCTGAGCTTGCAGTGGACAACGGGATGGAA  
AACTCCTCAAAAAGCAGGACTGGGTCTTCTGGGGACAGTGGAAAACTGAACCGAATGAG  
TTGAGACTTCAAAGACTGAAGATGCCCTGGATTGGGAGAGAAAAATGCAGATGTAGAA  
ATTCGAAAAGATACTGGATGAGCAGATTTGGCAGAGAGCCAGTCAGCAAACGCCTCGAC  
AATTCACAATACCTGTTCCAGGCACCAAATCACTACATTTTCCAAGGAGCAGAAGTCTAC  
TCCAATCCGAAGATGAGTCTTCGAGTTCCTGTGGAAGTACAGCGAGGAGTCATACTGC  
AGCCAGGAGAGATGGGGGAGGACGACAGCGATGGTGAAGAGCTCTATGGCCGATTAGAA  
GAGGCCGAGGATGGAGAAGAGTGTGAGGAGCAATGGAGAACAGCTAGAAAAGCAAACC  
AATGACCGGGAAATCCTGAAAGACAGTATAGCTGAGGATGTTACAAATATGACACCGATG

>guppy\_SIRT1

ATGGCGGACAGAGAGAACGCTCTCGGAACGGCTTGTTTCAGGCACCTCTGAGATGGACGAA  
CCTATCGCAAAAAGGTCAAAAATCTATCCGGTGACCAACCACGGACCTAGAGCCATAGAA  
ACGGACACAATCTCTGTGTTTCGGCGGCCATTGGGAGCCTGGAAGAGGCGGGGAATTGT  
GCCGAGCCAGCGGAGAAGAAGGAAGCGAAGCCGGTGATGATGGCGGTGGAGCAGGCCCT  
GCATCGCGAGGCGGGACAACAATGGACTGAGTCTGCCGGTCTCCGAGCCGCTTAAATCA  
TCTGGGAAATTAGGCGACAGCACCCTTTGGTGCAAGTGAGGAAGGTGCCGATTTTCTT  
GGACATGACGATCTGCTTCGCAATGGTCTTGTGTACACCAGAGCACATTGATGAGGAA  
GATGACAGATCTTACATGCAAGCTCCAGTGACTGGACTCCTCAACCGCAAATAAGTTCCG  
TACAGTTACATCCAGCAGCACATCAGAGAGACGGATCCACGGGCCATTCTGAGGGATCTG  
CTTCTGAAACCATCTCCCCCAGACCTGGATGATATGACGTTATGGCAGATAATCATC  
AACATCTCTGAGCCTCAAAAAGAAAACGAAAGGATATCAACACCCTGGAAGATGTG  
GTGAAGCTGCTTCATGAAAGCAAAGGATCCTAGTCCTGACTGGCGCTGGTGTGTCCGTT  
TCATGTGGAATACCAGACTTTCGCTCCAGAGATGGAATTTATGCACGACTTGCTGTAGAT  
TTTCTGATCTTCCAGATCCTCAATCAATGTTTGATATTGAATTTTTCAGAAGAGACCCT  
AGACCCTTTTCAAGTTTGCTAAGGAGATCTTCCCGGTCAAGTTCCAGCCGTCGCCCTGT  
CACAGATTTATCCATGCTGGATAACAAGGGAAGCTGCTTCGCAATTCACTCAAAC  
ATTGATACGTTGGAGCAAGTGGCCGAGTCCAGCGAATCATCCAGTGCCATGGATCATT  
GCTACTGCATCGTGTCTTATCTGTAAACACAAGGTGGATTGTGAGGCGATAAGGGCTGAC  
ATCCTCAATCAGGTCGTCCCCGTTGCCCGGTTCGGACATTCTCTGGCCATCATG

AAACCTGACATCGTGTTTTTGGAGAGAATCTCCAGAACTTTCCACAGAGCCATGAAG  
CAGGACAAAGACGAGGTCGACCTTCTGATCGTCATCGGCTCGTCTCTAAAAGTCCGGCCG  
GTCCGCTCATTCCGAACTCCATTCCTCATGAAGTGCCTCAGGTTCTGATCAACAGGGAG  
CCGCTGCCTCATCTGAACTTCGACGTGGAGCTGCTGGGCGACTGCGACGGCATCATCAAC  
GAACTCTGCCACCGGCTGGGCGGAGACTTCGAGCAGCTGCGCTTCAACTCTAACCCCTC  
AACGAAATCACAGAGAAACCGCCGCGTTAGCAGAGCCGCGCCGCCCCGACGAGGCTTCC  
ACTGACCCGGCGGACAAACCTCCAGAAGAGACGGAGAGCGAGAATGTCACGGAAAACCGTA  
ACGCCGTCGGAGCCTTGTTTGAACGCGGCGAGTCAAGCGCGGACGCCGCCGAGTCGCCG  
GAGCCTCAGAGAGAGGATGCGGCGAAAGACGAGGCAGGCGAGGCGAAGAGCCAAATCTCA  
AAGCCGGACAATCGAAAGCGATACTGGATGAGTCGGGTCAGCAGGAGTCCAATCAGCAA  
CGGCTTGAAGGCTGTCAGTACCTTTTCCAAGCACCGAATCGATACATCTTCCACGGCGCC  
GAGGTCTACTCCGACTCCGAGGAGGACGAGACGTGAGCTCCTGCGGGAGCGACAGCGAC  
GGCTCCGACTGCAGCCAGGACGGGCCGGAGGACTGCAGCGAGGCCGAGGACGGCGCCCCG  
CCCCGGGGCAGGAGGCCGATCCACAGAGACACGTTACCGCTAAACGAAGAGGCCACGCC  
ACTCTGCAGACAGACTTCACATCAGAACACTCTGAGAGGACCACACATCTT

>American\_alligator\_SIRT1

ATGACTGCGGCGGACAACTCCTTTTTAGTGATGAGGTCATAGCCAATGGTTTCCATTCT  
TGTGATAGTGATGAAGATGACAGACCTCGCATGCAAGTTCTAGTGAAGTGGACTCCAAGA  
CCACGGATAGGTCCCTACACTTTTGTTCACAGCATCTTATGTTAGGCACAGACCCAAGG  
ACAATTTGAAAGATCTGTTACCAGAACTATTCTCCACCTGAACTAGATGATATGACA  
CTGTGGCAAATTGTTATAACATTCTTTCAGAACCAACAAAAGGAAAAACGAAAAGAT  
ATTAATACCATTGAGGATGCTGTGAACTTTTGAAGAGTGCAAAAAGATTATGGTTTTG  
ACTGGAGCAGGGGTGCTGTGTCTTGTGGAATACCTGATTTCCGATCAAGAGATGGCATC  
TATGCACGTCTTGAATAGATTTCCAGACCTTCCAGATCCTCAAGCAATGTTTGATATA  
GAATACTTCAGAAAGGATCCAAGACCATTTTTTAAGTTTGCAAAGGAAATATATCCTGGG  
CAATCCAGCCATCCCTCTGTATAAATTCATAGCTTTGATGGATAAAGAAGGAAAGCTA  
CTTCGCAACTACACTCAAAACATAGATACTGGAACAGGTTGCAGGAATCCAAAGGATA  
ATACAGTGCATGGTCTTTTGTCTACAGCTTCTGTCTAATCTGTAAATACAAAGTTGAC  
TGTGAAGCTGTTTCGAGGAGACATTTTAATCAGGTTGTTCTAGATGTCCAGATGTCCA  
CCCAGTGAACCACTCGCTATTATGAAGCCAGAAATAGTATTCTTTGGAGAGAACTACCA  
GAGCAGTTCCATAGGGCCATGAAGTATGACAAAGATGAAGTAGATCTCCTTATTGTAATT  
GGGTCTTCACTAAAAGTAAGACCAGTAGCACTGATTCCAAGTTCTATCCCCATGAAGTG  
CCTCAGATATTAATTAAGGGAACCTTTGCCTCATCTACACTTTGATGTGGAACCTTCT  
GGAGACTGTGATGTAATCATTAAATGAACTATGTCAAAGGCTGAGTAGTGAATATACAGAA  
CTTTGCTACAACCTCATAAACTTTTCAGAAATAACAGAAAAACCAACGAATGCACAAG  
GAGCTTGAATGAATTCAGCTGAGTTACCACCTACCCCTTTAAACGTTTCTGAAGACTCT  
AGTTCACCTGAAAGAGCAACTCCCCAGACTCTTTGGTTGTGCTCTCAGAGCATCCAACA  
AAATGTAGGGCAGAAAATTCTGAACTTGCTCAGACTCTAGTAGGAACTGCGTGGAGAAA  
TTCCAGGAGGTACAGACATCCTCAGAAAATCCTGAAAGTATTACTGGCCAGTTAACGAAT  
TTAGAATCCAAAAGAAAATGGAGCTAACAAATGGAGAACAGAAAGAAAAAATGATATA  
ACTTCATCAGTTGAACTTTGAGGAAGTGTGGCCAAACAGATGTGCAAAAGAACAGATT  
AGCAAGCGGCTTGATGTGCTAGCCTGTGCCATAATGGATACATCCTACAACAATGTC

>Armadillo\_SIRT1

ATGGCGGACGAGGCGGCGCTCGCCCTTCAGCCCGGCGGGTCCCCCTCTGTGGCGGCGGCC

GAGAGGGAGGCCGGGTCGCCAGTAGGGGAGCCGCTCCGGAAGAGGCTGAGGAGAGAC  
GGCCCTGGCTTCGGGCGGACACCGGGCGAGCCCGAGGGGCGGCCCCAGAGCGTGAGATG  
CCGGCGGTGGCGGCGCTGTGGCGGGAGGTGCCGGCCGGGGCGGGGAACGGGAGGCCAG  
GAGGCCGGGGCAACAGGAGGAGACAATGGGCCGGCCTGCAGGCCCTATCCCGGAGCTG  
CCGCCGGTCGACGACTTCTACGAAGACGACGACGACGAAGGCGAGGAAGAGGAAGAGGCG  
GCGGCGGCGGCGATTGGGTACCGAGATAACCTTCTGTTTCGGTGATGAAATTATCACCAAT  
GGCTTTCATTCTGTGAAAGTGATGAGGATGATAGAGCCTCACATGCAAGCTCTAGTGAC  
TGGACTCCAAGGCCACGGATAGGTCCATATACTTTGTTTCAGCAACATCTCATGATTGGC  
ACAGACCCTCGAACAATTCTTAAAGATTTACTACCAGAAACAATTCCTCCACCTGACTTG  
GATGATATGACATTGTGGCAGATCGTTATTAATATCCTTTTCAGAACCACCAAAAAGGAAA  
AAAAGAAAAGATATTAATAACAATTGAAGATGCTGTGAAATTACTGCAAGAGTGCAAAAAA  
ATAATTGTTCTAACAGGAGCTGGGGTGTCTGTTTCCTGTGGAATACCTGACTTCAGGTGCG  
AGAGATGGTATTTATGCACGCTTGAATAGACTTCTCTACCTTCTCAGATCCTCAAGCA  
ATGTTTGATATTGAATATTCAGAAAGGATCTCAGACTCATTTCAGTTTGCAAAGGAA  
ATATATCCCGGACAGTTCCAACCATCTCTTTGTCACAAATTCATAGCCTTGTGAGATAAG  
GAAGGAAAATACTTCGCAACTATACTCAGAACATAGATACTGGAACAGGTTGCAGGA  
ATCCAAAGGATAATTCAGTGTACGGTCTTTTGCACAGCATCTGCCTGATTTGTAAA  
TATAAAGTTGACTGTGAAGCTGTACGAGGAGATATTTTGTATCAGGTGGTTCCTCGATGT  
CCTAGGTGCCAGCTGATGAACCACTGGCTATTATGAAACCAGAAATTGTCTTTTTTGGT  
GAAAATTTACCAGAACAGTTTCACAGAGCCATGAAGTATGACAAAGATGAAGTCGATCTC  
CTCATTGTTATTGGGTCTCCCTGAAAGTACGACCAGTAGCACTAATTCAGTTCCATA  
CCCCATGAAGTGCCTCAGATATTAATTAATAGGGAACCTTTCCTCATCTGCATTTTGAT  
GTGGAGCTTCTGGAGACTGTGATGTCATAATTAATGAGTTGTGTCATAGGTTAGGTGGT  
GAATACGCCAAACTTTGCTGCAACCCTGTAAAGCTTTCAGAAATTACTGAAAACTCCA  
CGAACACAAAAAGAGTTGGCTCATTGTGTCAGAGTTGCCACCCACACCTCTTAATTTCA  
GAAGACTCAAGTTCACCAGAAAGAATTCACCTGATTCTTCAGTGATTGTCACACTTTTA  
GATCAAGGTACCAAGAATAAAGTTGATGATTTAGATGTGTTGGAATCAAAGGTTGTAAT  
GAAGAAAAATCACAGGTAATACAGACTTCTACTAGGAACACTGAAAATATTCCTGAACAG  
TTGGAGAGTCCGATTTGAAGAACGTTGGCTCCATTACTGGGGAGAAAAATGAAAGAACT  
TCAGTTGCCGAAACAGTGAGAAAATGCTGGCCTACTAGACTTGCAAAGGAGCAGATCAGT  
AAGCGCTTGATGGTAATCAGTATCTGTTTTACCACCGAATCGTTACATTTCCATGGC  
GCTGAGGTATATTCAGACTCAGAAGATGATGTCTTATCCTCTAGTTCTTGTGGCAGTAAT  
AGTGATAGTGGAACCTGCCACAGTCCAAGTTTAGAAGAACACATGGAGGATGAAAGTGAG  
ATTGAAGAATTCTACAATGGGTTGGAGGATGATGCTGATGTTCCAGAGCGAGGTGGAGTA  
ACTGGCTTTGGGGCTGATGGAGGTGACCAAGAGGCAGTTAATGAAGCTACATCTGTGAAA  
CAGGAAGCAGTGGACATTAATTATCCATCAAACAAATCA

>Chicken\_SIRT1

ATGGCGGACGGGAGGCTCCGCTCCTCCGGCCCCGCGACGGCGGCCCCGGCGCCGCGGC  
GAGAGCGTCGAGCCCGCGCCAAGCGCCAGCGCCTGAACTCGGAAGACGGCGTCTGCGGC  
CGGGGCGCGCCCGCCACCGCCCGGACCGGGGCGCGGGGCCCTCCCGCCGCGCC  
GCCGCGACGGAACCTCCGGCGATGCGGCGCCGTCAGCGCCGACGGCGACGTCCGGGCG  
CGGGAGGAGGACGGCGGCGGACGACGGAGGGCCGGAGCGGCGGACAATAGGGCCGCG  
CAGCGGGCCTGGCCCGGGCGGAGCCGCCTCCGCAGCCGCGGCGGAGGGCCGGGGGAG  
GGGCGGAGGCGGCGCCCGGCGAAGACGCGGCGGAGGCGCCATTGGCTGCGAGCGGGCG



CAGCGTTCAAACGGGGCGGCCGGAGCGCCGGCCCCGCAGCCCGATAAATTCTTTTAAAGT  
GATGAAATCATAGCCAATGGTTTCCACTCCTGTGATAGTGATGAAGATGACAGAGCTTCA  
CATGCAAGTTCTAGTGACTGGACCCCAAGACCACGTATAGGTCCTTATACTTTTGTCAA  
CAGCATCTCATGTTAGGCACAGACCCACGGACAATTCTTAAAGACCTGCTCCAGAAACG  
ATCCCTCCACCTGAACTGGATGATATGACTGTGGCAAATTGTCATAAACATTCTTTCC  
GAACCACAAAAAGAAAAAACGAAAAGACGTTAATACTATTGATGATGCAGTGAACTT  
TTACAGGAGTGCAAAAAATCATGGTCTTGACAGGAGCCGGGGTGTCTGTGTCTTGTGGA  
ATACCCGACTTTAGATCAAGAGACGGCATCTATGCACGCCTTGCTGTAGACTTCCCAGAC  
CTTCCAGATCCTCAAGCAATGTTTGTATAGAATACTTCAGAAAGGATCCCAGGCCATTT  
TTTAAAGTTTGCAAAGGAAATCTACCCAGGCCAGTTCCAGCCATCTCTGCCACAAGTTC  
ATAGCTTTGATGGATAAAGAAGGAAAATTGCTTCGTAATACTCAGAACATAGACACA  
TTGGAACAGGTTGCAGGAATCAAAGGATAATTCAGTGTGATGGTTCCTTTGCAACAGCT  
TCCTGCCTGATCTGTAAATACAAAGTTGATTGTGAAGTTGTTGAGGAGATATTTTCAAT  
CAGGTTGTTCTAGATGTCCTCGCTGTCTGCCTGATGAACCACTTGCTATCATGAAGCCT  
GACATAGTGTCTTTGGAGAGAACTTACCTGAGCAGTTCATCGCGCCATGAAGTATGAC  
AAAAATGAAGTTGATCTCCTTATTGTGATTGGGTCTTCACTGAAAGTAAGACCGGTAGCA  
TTGATTCAAAGTTCATCCCCATGAAGTGCCTCAGATCTTAATTAATAGGGAACCTCTG  
CCTCATCTACACTTTGACGTGGAGCTTCTTGGAGACTGTGACGTTATTATTAGTGAATTA  
TGTCAAAGGCTAGGTAGTGAATATACAAAAGTGTCTACAACCTCAGTAAAACCTTTCAGAA  
ATAACAGAAAAGCCTCCACGAATGCACAAAGAGCTCGAAATGCACTCATCTGAGTGCCA  
CCTACACCCTTAGACATTTCAGAAGACTCTGGTTCACCAGAACAAATGACTCCACCGGGT  
ACTTCGGTGGTGCCCTCAGAACACGCAGCTGAATGTAAGGTAGAAAACCTGATCCTGCC  
TCTGAAACTAAAGGGATCTGCACAGAGGAAAAGCTTCAAGACACACAGGCATCCTCTGAA  
AACCTGAAAATCCTGCTAGTGAATTAATGAACTCTGAAACGATGAAGGAAAATGGAACC  
AACAAATGGAGAAAAGCAAAGAAAAAATGAAATAGTGAAGAAGTGCTGGGTAAACAGATCT  
GCAAAAAGAACAGATCAGCAAAAGGCTGGATGGTACTCAGTATCTGTTTTTACCACCAAT  
CGCTATATTTTCCATGGAGCTGAGGTATACTCAGATTCTGAAGATGATATGATATCTTCT  
AGCTCTTGTGGGAGTAGTAGCGAAAGCGGCTCGTGTACAGTCAGAGCTTAGATGTGGAG  
GATGAGAGCGAGATCGAAGAGTTTTACAATGGCATAGAAGATGAGGATGCTCCAGAAAGG  
GAAGTGGAAAGCTGCATTTGAGGAGGATGGAGTTGAACAAGATGCAGCTGATGAATCAGCT  
TACACAAATGAAGCTGCAGGGAACGATCATCCAACAAGCAACAAGTTG

>Chinese\_softshell\_turtle\_SIRT1

ATGATAGGCACAGACCCCGGGCAATTCTGAAAGACTTGCTACCAGAAACAATCCCCCA  
CCTGAATTGGATGATATGACTCTGTGGCAGATTGTTATAAACATCCTTTCAGAACCACCA  
AAAAGGAAAAACGAAAAGATATTAATACTATTGAAGATGCTGTGAACTTTTACAAGAG  
TGCAAAAAGATAATTGTTTTGACTGGAGCTGGGGTGTCTGTTTCTTGTGGAATACCTGAC  
TTCCGATCAAGAGATGGCATATACGCCCGCCTTGACAGTAGACTTCCCAGACCTTCCAGAT  
CCTCAAGCAATGTTTGTATAGAATACTTCCGAAAGGATCCAAGACCATTTTTTAAAGTTT  
GCAAAGGAAATATATCCTGGTCAGTTTCCAGCCATCTCTGTGATAAATTCATAGCTTTA  
ATGGACACAGAAGGAAAAGTACTTCCGAACTATACTCAGAACATAGATACGCTGGAACAG  
GTTGCAGGAATCCAGAGGATAATCAATGTCATGGTTCCTTTGCAACAGCTTCTGCCTA  
ATCTGTAAATACAGAGTTGACTGTGAAGCTGTTGAGGAGACATTTTTAATCAGGTTGTT  
CCTAGATGCCCCAGGTGTCCACCTGATGAACCACTTGCCATCATGAAGCCAGAGATAGTG  
TTCTTTGGAGAAAATTACCTGAGCAGTTCATAGGGCCATGAAGTATGACAAAGATGAA

GTTGATCTCCTTATAGTTATTGGGTCTTCACTGAAAGTAAGACCACTAGCACTGATCCCA  
AGTTCCATCCCCATGAAGTGCCTCAGATCTTAATTAATAGGGAACCTTTGCCTCATCTA  
CACTTTGATGTGGAGCTTCTAGGGGACTGTGATGTCATTATTAATGAGTTATGTCAAAGG  
CTAGGTGATGAATATACAAAACCTTTGCTGTAACCTCAGTAAAACCTTCAGAAAATAACAGAA  
AAGCCCTCACGAATGTATAGGGAACCTTGAATGAATTCAGCTGAGTTACCACCTACCCCT  
TTAAACATTTCTGAAGACTGCAGTTCACCAAACAGAATGACACCACCTGGTCCTTTAATG  
GTACTCTCGGAGAATCCAGCTGAATGGAAGGCAGAACATTCTAATCTGCCTCAGAATTT  
AAAGGCAATCATCAGGAGAAAGAATCGCAAGAAGTACAAACATGCTCAGAAAACACAGAA  
TGTATTACTGGCCAGTTAATGAACTCAGAACATATGAAGGATAATAGCTCTAACAAGGAA  
GAAAATAAAGAGAAAAATGAATAAATTCATCTGTTGAAACATTGAGGAAATGTGCAAT  
AGATTTGCAAAGAACAATTAGCAAGCGGCTTGATGATACTCAGTACTTATTTTTACCA  
CCAAATCGCTACATTTTCCATGGTGCTGAGGTATACTCAGACTCCGAAGACGATGTCATA  
TCTTCTAGTTCTTGCGGGAGTAGTAGTGATAGTGGTTCTTGTTCATAGTCCAAGCTTAGAT  
GTAGAAGACGAAAGTGAGATTGAAGAATTCTATAATGGCATGGAGGAGGAGGAGGCTCCA  
GAGAGAGAAGAGGAGACTGGATTTGGGGAAGATGGAGTTGAACAAGATACAGTTGATGAA  
CCAGATCAGAAAAATGAAGCAACAGGAATTGATTGTCCATCAAATTGTAATCAT

>Cod\_SIRT1

atggcggacggagagaacattctcggcagcgcctgcgctagcgcgctgatacggaggag  
cccgctcaaaaaagtcaaaaatcaacatgattccaactatggattcaaatagccgag  
accgagcacatatctcgtgttgaggcgacaggcagctgggaggcgatggtgaattcc  
gtgcagcagcagccgcccggcagagagaaggaggtgagccggtgatggcggtagag  
caggccccagtagcactaggcggagacaatggggctcccctgctgatcctggagccggac  
agaacagacgtgaaccagacgagaacatgcgctcggatcgtcggcagacccccagat  
gttcttggtcttccccaacgggtgggagcactccccgaagacgatgacaggtcttca  
cacgcaagttccagcactggacacctcaacctcaaataggttctacagtttcattcag  
caacacataatgagagagacggatcctaggaccattctgaaggacctgcttcagagacc  
acgctcccggacactggatgacatgacgttggcagatcatataaacatctcggag  
ccggcaaaagaaagaagcgaaggatattaacacgctagaggacgtggctaggctcctc  
catgaaagtaaaaggatccttggtgaccggtgctggggtgtctgtcgtggtgaatt  
ccagactccgatcccgcgatggtattatgcaaggcttctgtggacttccctgatctt  
ccagatcctcaatcatgtttgacattgaatacttcaagagatccgacccctcttt  
aagtttccaaggagatctacccggtcagttccagccatcacctgtcacaattcata  
tccatgctggataagaaggagaagctttgcgaattaccccagaacattgacacactg  
gaacaagtgagcaggtgtacaaaggattatcagtgccatggttcattgcaacggcgtcc  
tgtctggtctgcaaacactcggttgactgtgaggctatccgggaagacatctcaaccag  
gtggttctcgggtgtccacattgtgcagataccccttgcaatcatgaaaccagacatc  
gtcttctcggagagaatcttcagaattgttccagagccatgaaacaagacaaagac  
gaagtggacctgtgatagtcagcctcacttaagtgagaccggtcgtcttctatc  
ccaaactccatccctcacgactgtccacagatcctcatcaaccgggagcagctccccac  
ctgaacttcagctggagctgctgggagcactgtgacgtcatcgtcaacgactctgccac  
cggctggggggcacttcgagcagctgtgcgaccagacctaagactcagtgagatcaca  
gagaagccgccggttaccggacgacgacgatgacgccgccgcccgtggagaccgtg  
acgacgttgacacctccgaaccggacgagacgccgagggagagcggctcggggcgcc  
gcacccgcgcttccacgcttcagaggagacggcagggggaacggctgccgaagcctca

gtccccgccgctgaccacgtgcctccagagccgtgtccggcggcggcagaacaaccctc  
cagaacgccgccacgaccgaggatccccggaggacgagacggaggacacgccaag  
gaagaggaagcagagcccagacgccgagctcaaacctggatcttcgaggagatgctgg  
atgagtcgtctcggcaggagcccgatcagcaagcgccttgagagtaagcctgggactgtg  
acagggccgctcggttatggaagaaatcgtattcacgatcattttggtcaatat

>Cow\_SIRT1

ATGGCGGACGAGGCGGCGCTGCCCTTCAGCCCGGCGGCTCTCCCTCGGTAGTGGCGGCT  
GAGAGGGAGGCCCGTCCGCCCTGCTGGGGAGCCGCTCCGCAAGAGGCCGCGAAGAGAC  
GGCCCCGGCGTCGGGCGGAGCTCGGGCGAGCCCGGTGGGACGGCCCCGAGCGGGAAGT  
CCGGCGGCGGCCGGCAGTTGCCCGGCGGCGGCGGCGGCTGTGGCGGGAGGCCAGGCG  
GCGGCGGCGGCGGCGGCCGAAGAAGAAGACAATGGGCGGGCTTACAGGGCCTATCCAGG  
GAGGCGCCACCGGCCGACGACTTCTACGACGACGACGACGAGGGCGAGGAGGAGGAAGAG  
GCGGCGGCCGCTATTGGGTACCGAGATAACCTTCTGTTTGGTGATGAAATCATACCAAC  
GGTTTCCATTCGTGTGAAAGTGACGAAGATGATAGAGCCTCGCATGCGAGTTCTAGTGAC  
TGGACTCCAAGACCTCGGATAGGTCCATATACTTTTGTTCAGCAACATCTCATGATTGGC  
ACAGATCCTCGAACAATTCTTAAAGATTTACTACCAGAAACAATTCCTCCACCTGAATTG  
GATGATATGACACTGTGGCAGATTGTTATTAATATCCTTTTCAGAACCACCAAAAAGGAAA  
AAAAGAAAAGATATTAATAACAATTGAAGATGCTGTGAAATTACTGCAAGAGTGCAAAAAA  
ATAATAGTTCTAACTGGAGCTGGGGTTTCTGTTTCTTGTGGAATACCTGACTTCAGGTCA  
AGAGACGGTATTTATGCTCGCCTTGAATAGACTTTCCAGACCTTCAGATCCTCAAGCA  
ATGTTTGATATTGAATATTCAGAAAAGACCCAAGACCATTCTTCAAGTTTGCAAAGGAA  
ATATATCCTGGACAATTCCAACCATCTCTTGTACAAAATTCATAGCCTTGTCTGATAAG  
GAAGGAAAATACTTCGCAACTATACTCAGAACATAGATACTGGAGCAGGTTGCAGGA  
ATCCAAAAGATAATTCAGTGTGATGGTTCCTTTGCAACAGCATCTTGCCTGATTTGTAA  
TATAAAGTTGACTGTGAAGCTGTACGAGGAGATATTTTAAATCAGGTGGTTCCTCGATGT  
CCTAGATGCCAGCTGATGAACCGCTTGCTATCATGAAACCAGAAATTGTCTTTTTTGGT  
GAAAATTTACCAGAACAGTTTCATAGAGCCATGAAGTATGACAAAGATGAAGTTGATCTT  
CTCATTGTTATTGGATCTTCCCTGAAAGTAAGACCAGTAGCACTAATTCCAAGTTCCATA  
CCCCATGAAGTGCCTCAGATATTAATTAATAGGGAACCTTGCCTCACCTGCATTTTGAT  
GTAGAGCTTCTTGAGACTGTGACGTAATTATTAATGAACTGTGTCATAGGTTAGGTGGT  
GAATATGCCAACTTTGCTGTAACCCTGTGAAGCTTTCAGAAATTACTGAAAAACCTCCT  
CGAATACAAAAGAGTTGGCACATTTGTGAGAATTGCCACCCACACCCCTCAATATTTCA  
GAAGGCTCAAGTTCACCAGAAAGAACTTACCACCAGATTCTTCAGTGATTGTCACTCTT  
TTAGACCAAGAAACAAAGAGTAACGTTGATGATCCAGATGTGTCTGAATCAAAGACCAT  
GTCACAGAAAAATCACAGGAAGTACAGACTTCTACTAGGAGCATTGAAAGTGTTAATGAA  
CAGTTGGAGAGTCCAGATTTGAAGAATGCTGTCTCCAATTCTGGTGAGAAAAATGAAAGA  
ACTTCAGTAGCTGAAACAGTGAGAAAATGCTGGCCAGCTAGACTTGCAAAGGAGCAGATT  
AGTAAACGCCTTGATGATAATCAGTATCTGTTTTTACCACCAAACCGTTACATTTTCCAT  
GGCGCTGAGGTATATTCAGACTCTGAAGATGATGTCTTATCCTCTAGTTCTTGCGGCAGT  
AACAGTGATAGTGAACGTGCCAGAGTCCAAGTTTGAAGAACCCTGAGGATGAAAGT  
GAGAATGAAGAATTTACAATGGTTTGAAGATGATGCTGATGTTAATGAGAGAGCTGGA  
GGAAGTGTATTTGAAGCTGATGGAGGTGATCAAGAGGCAATTAATGAAGCTATATCTGTG  
AAACAGGAAGCAACATGCATTAACATCCATCAAACAAATCA

>Dog\_SIRT1

ATGGCGGACGAGGCGGCGCTCGCCCTTCAGCCCGGCGGCTCCCCCTCGGCGGTGGCGGCC  
GAGAGGGAGGCCGCTCGCCGCCCGGGGAGCCACTCCGCAAGAGGCCGCGGAGAGAC  
TGTCCTGGCCTGGGGCGGAGCCCAGGCGAGCCCGGCGGGGCGGCCCTGAGCGGGAGGTG  
CCGGCGGCGACCGGGGCTGCTCCGCGGCGGCCGCGGCGCTGTGGCGGGAGGCGGCGGC  
GGCGGGGAGCGGGAGGCCAGGCGGCGGTGGCGGCGGCCGAGAAGGAGACAATGGGCCG  
GGCCTACAGGGCCTAACGCGGAGCCGCTGCCGGCTGACGACTTTGTTGACGACGACGAT  
GACGACGAGGGCGAAGAGGAGGAAGAGGCGGCGGCGGCTCGGCGATTGGGTACCGAGAT  
AACCTTCTGTTTGATGATGAAATAATCACCAACGGTTTTTCATTCTGTGAAAGTGATGAG  
GATGATAGAGCCTCACATGCAAGCTCTAGTGACTGGACTCCAAGGCCCGGATAGGTCCA  
TATACTTTTGTTCAGCAACATCTCATGATTGGCACAGATCCACGAACAATTCTTAAAGAT  
TTACTACCAGAAACAATTCCTCCACCTGAATTGGATGATATGACTGTGGCAGATTGTT  
ATTAATATCCTTTCAGAACCACCAAAAAGGAAGAAAAGAAAAGATATTAATACAATTGAA  
GATGCTGTGAAATTACTGCAAGAGTGCAAAAAATAATAGTTCTAACTGGAGCTGGGGTT  
TCTGTTTCTGTGGAATACCTGACTTCAGGTCAAGAGATGGTATTTATGCTCGCCTTGCA  
ATAGACTTCCAGACCTTCCAGATCCTCAAGCAATGTTTGACATTGAATATTTAGAAAAG  
GATCCAAGACCATCTTCAAGTTTGCAAAGGAAATCTATCCCGACAGTTCCAACCATCT  
CTCTGTCACAAATTCATAGCCTTGTGAGATAAGGAAGGAAAATACTTCCGAACTATACT  
CAGAACATAGATACACTGGAACAGGTTGCAGGAATCCAAGGATAATTCAGTGCATGGT  
TCCTTTGCAACAGCATCTTGCCTGATTTGTAAATACAAAGTAGACTGTGAAGCTGTACGA  
GGAGATATTTTTAATCAGGTGGTTCCTCGTTGCTTAGGTGCCAGCTGATGAGCCACTT  
GCTATCATGAAACCAGAGATTGTCTTTTTTGGTAAAATTTACCAGAGCAGTTTCATAGA  
GCCATGAAGTATGACAAAGACGAAGTTGATCTCCTCATTGTAATTGGGTCTTCCCTGAAA  
GTAAGACCAGTAGCACTAATCCAAGTTCCATACCCCATGAAGTGCCTCAGATATTAATA  
AATAGAGAACCTTGCCTCATCTGCATTTTGATGTAGAGCTTCTGGAGACTGTGATGTC  
ATAATAAATGAATTATGTCATAGGTTAGGTGGTGAATATGCCAAACTTTGCTGCAACCCT  
GTAAAGCTTTCAGAAATCACTGAAAAGCCTCCACGAACACAAAAAGAGTTGGCTCATTTG  
TCAGAGTTGCCACCCACACCTCTTAATATTTCAGAAGACTCCAGTTCACCGAAAGA  
TCACCACCAGATTCTTCAGTGATTGTTACGCTTTTAGACGAAGCAACTAAGAGTAATGTT  
GATGATCCCGGTGTGTCGAATCAAGAGATTGTATGGAAGAAAAATCACAGGAAGGACAG  
AATTCTATTAGGAACATTGAAAGTGCTACTGAACATCTGGAAGTCCGGATTGAAGAAT  
GTTGGCTGTAATACTGGGGAGAAAATGAAAGAACTTCAGTTGCTGACCCGGTGAGGAAG  
TGCTGGCCAGCTAGACTTGCAAAGGAGCAGATTAGCAAACGGCTTGATGGTAACCAGTAT  
CTCTTTTACCACCAAATCGTTACATTTCCATGGCGCTGAGGTATATTCAGACTCTGAA  
GATGACGTCTTATCCTCTAGTCTTGTGGCAGTAACAGTGATAGTGAACCTGCCAGAGT  
CCAAGTTTGAAGAACAATGAGGATGAAAGTGAGATTGAAGAATTTACAATGGTTTG  
GAAGATGAAGCTGATGTCAATGAGAGAGCTGGAGGAACTGGATTGGAATTGATGGAGGT  
GATCAAGAGGCAGTCAATGAAGCTATATCCATGAAACAGGAAGCAACAGATACTAACTAT  
CCATCAAACAAATCA

>Dolphin\_SIRT1

ATGATTGGCACAGATCCTCGAACGATTCTTAAAGATTTACTACCAGAAACAATTCCTCCA  
CCTGAATTGGATGATATGACTGTGGCAGATTGTTATTAATATCCTTTCAGAACCACCA  
AAAAGGAAAAAAGAAAAGATATTAATACAATTGAAGATGCTGTGAAATTACTGCAAGAG  
TGCAAAAAAATAATAGTTCTAACTGGAGCTGGGGTTTCTGTTTCTGTGGAATACCTGAC  
TTCAGGTCAAGAGATGGTATTTATGCTCGCCTTGACAGTAGACTTTCCAGACCTTCCAGAT

CCTCAAGCAATGTTTGACATTGAATATTTTCAGAAAAGATCCAAGACCATTCTTCAAGTTT  
GCAAAGGAAATATATCCTGGACAATTCCAACCATCTCTGTACAAAATTCATAGCCTTG  
TCAGATAAGGAAGGAAAACTACTTCGCAACTATACTCAGAACATAGATACTGGAACAG  
GTTGCAGGAATCCAAAGGATAATTCAGTGTGATGGTTCCCTTTGCAACAGCATCTTGCCTG  
ATTTGTAAATACAAAGTTGACTGTGAAGCTGTACGAGGAGATATTTTTAATCAGGTGGTT  
CCTCGATGTCCTAGGTGCCAGCTGATGAACCACTTGCTATCATGAAACCAGAGATTGTC  
TTTTTTGGTGAAAATTTACCAGAACAGTTTCATAGAGCCATGAAGTATGACAAAAGATGAA  
GTTGATCTTCTCATTGTTATTGGGTCTTCCCTGAAAGTAAGACCAGTAGCACTAATTCCG  
AGTTCCATACCCCATGAAGTGCCTCAGATATTAATTAATAGGGAACCTTTGCCTCACCTG  
CATTTTGATGTAGAGCTTCTTGGAGACTGTGATGTCATTATTAATGAATTGTGTCACAGG  
TTAGGTGGTGAATACGCCAACTTTGCTGCAACCCTGTAAAGCTTTCAGAAATTACTGAA  
AAACCTCCACGAACACAAAAAGAATTGGCTCACTTGTGAGAGTTGCCACCCACACCCCTC  
AATATTTTCAGAAGGCTCAAGTTCACCAGAAGGAACCTCACCAGCAGATTCTTCAGTGATT  
GTCACTCTTTTAGACCAAGAAACAAAGAGTAATGTTGATGATCCAGATGCGTCTGAATCA  
AAAAACTGTGTCGAAGAAAAATTACAGGAAGTACAGACTTCTGCTAGGAGCATTGAAAGT  
GTTAATGAACAGTTGGAGAGTCCGGATTTGAAGAATGTTGCCTCCAATACTGGGGAGAAA  
AATGAAAGAACTTCAGTTGCTGAAACAGTGAGAAAATGCTGGCCAGCTAGACTCGCAAAG  
GAGCAGATTAGTAAACGGCTTGATGGTAATCAATATCTGTTTTTACCACCAAACCGTTAT  
ATTTCCATGGTGCTGAGGTATATTCAGACTCTGAAGATGATGTCTTATCCTCTAGTTCT  
TGTGGCAGTAACAGTGATAGTGGAACATGCCAGAGTCCAAGTTTAGAAGAACCTATGGAG  
GATGAAAGTGAGATTGAAGAATTTACAATGGTTTGAAGATGATGCTGATGTTAATGAG  
AGAACCGGAGGAACTGGATTTGGAGCTGATGGAGGTGATCAAGAGGCAGTTAATGAAGCT  
ACATCTATGAAACAGGAAGCAACATGCATTAACATCCATCGAACAAATCA

>Duck\_SIRT1

ATGTCATTGTGCTGTCTTGACGATAACTTTCTTTTTAGCGATGAAGTCATAGCCAATGGT  
TTTCACTCCTGTGATAGTGATGAAGATGACAGAGCCTCACATGCAAGTTCTAGTGATTGG  
ACCCCAAGACCACGTATAGTTCCTTACACTTTTGTTCAGCAACATCTCATGCTAGGTACA  
GACCCACGAACAATTCTGAAAGACCTGTACCAGAAACAATCCCTCCACCGGAACTGGAT  
GATATGACGCTGTGGCAAATTGTCATAAACATTCTTTCAGAACCACAAAAAGAAAAAAG  
CGAAAAGATATCAATACTATTGATGATGCTGTGAAACTTTTACAAGAGTGCAAAAAATA  
ATGGTCTTGACGGGAGCTGGGGTGTCTGTGCTTGTGGAATACCTGACTTTAGATCAAGA  
GATGGCATCTATGCACGCCTTGTGTAGACTTCCCAGACCTTCCAGATCCTCAAGCAATG  
TTTGATATAGAATACTTCAGAAAGGATCCAGGCCATTTTTTAAGTTTGCAAAGGAAATC  
TATCCAGGACAATTCCAGCCATCTCTGTGACAAAGTTCATAGCTTTGATGGATAAAGAA  
GGAAAATACTCCGCAACTATACTCAGAACATAGACACATTGGAACAAGTTGCTGGAATC  
CAAAGGATAATTCAGTGTGATGGTTCCCTTTGCAACAGCTTCCCTGCCTGATCTGTAATAC  
AGAGTTGACTGTGAAGTTGTTGAGGAGATATTTCAATCAGGTTGTTCCCTAGATGTCCC  
AGATGTCCACCTGATGAACCGCTTGCCATCATGAAACCAGACATAGTGTCTTTGGAGAG  
AATTTACCTGAGCAGTTCCATCGCGCCATGAAGTATGACAAAAATGAAGTTGATCTCCTC  
ATTGTCATTGGGTCTTCACTGAAAGTAAGACCAGTAGCATTGATTCCAAGTTCCATCCCC  
CATGAAGTGCCTCAAATTTAATAAATAGGGAACCTTGCCTCATCTACACTTTGATGTG  
GAGCTTCTGGGAGACTGTGATGTTATTATTAATGAATTATGTCAAAGGCTAGGAAGCGAA  
TATACAAAATTTGCTACAATTCAGTAAAATTTTCAGAAATAACAGAAAAGCCTCCACGA  
CCGCACAAGGAGCTTGAAATGCACTCATGTGAGCTACCACCTACCCCTTTAAACATTTCA

GAAGACTCTAGTTCACCCAGAACAAATGACTCCACCGATTCTGTGGTGGTGCCTCGGAA  
CAGCCAGCTGAATGTAAGGTAGAAAAGTGTGATCCTGCCTCAGAAATAAAATGAGCTGC  
ACAGAGGAAAAGCTTCAGGACACACAGACATCCTCTGAAAACCTGAAAATGTTACTAGT  
GAATTAATAAACTCTGAAACAATGAAGGAAAATGGAACCAACGGAGAAAACAAAGAG  
AAAGAAATCTTGAAGAAGTGTGGGTAAACAGACCTGCAAAGAACAGATTAGCAAAGG  
CTGGATGGTACTCAGTATCTATTTTTACCACCAAATCGCTATATTTTTCCATGGTGTGAG  
GTATACTCAGATTCTGAAGATGATATCATGTCTTCTAGCTCTTGTGGGAGTAGTAGCGAA  
AGTGGCTCATGTCGTAGTCAGAGCTTAGATGTGGAAGATGAGAGTGAGATTGAAGAGTTT  
TACAATGGCAGATGAGGATGAGGATGCTCCAGAAAGGGAAGAAGAAGCTGGATTTGGGGAA  
GATGGAGTTGAACAAGATGCAGCTGATGAATCAGCTTATACAAATGAAGCTGCAAAGAAT  
GATCCAACAAGCAACAAATTG

>Elephant\_SIRT1

ATGATTGGAACAGACCCTCGAACTATTCTTAAAGATTTACTACCGGAAACAATTCCTCCA  
CCTGAATTGGATGATGACACTGTGGCAGATTGTTATTAATATCCTTTCAGAACCACCA  
AAAAGGAAAAAAGAAAAGATATTAATACAATTGAAGATGCTGTGAAATTACTGCAAGAG  
TGCAAAAAATAATAGTTTTAACTGGAGCAGGGGTGTCTGTTTCCTGTGGAATACCTGAC  
TTCAGGTCAAGAGATGGTATTTATGCACGCCTTGCAGTGGACTCCCAGACCTCCAGAC  
CCTCAAGCAATGTTGATATTGAATATTCAGAAAGGATCCAAGACCATTCTTCAAGTTT  
GCGAAGGAAATATATCCTGGACAATTCCAGCCATCTCTGTGCACAAATTTATAGCCTTG  
TCAGATAAGGAAGGAAAAGTACTCGCAACTATACTCAGAACATAGATACTGGAGCAG  
GTGGCAGGAATCCAAAGGATAATCAGTGTGATGTTTCTTTGCAACAGCATCTTGCCTA  
ATTTGTAAATACAAAGTTGACTGTGAAGCTGTACGAGGAGATATTTTTAATCAGGTGGTT  
CCTCGATGTCCTAGGTGCCAGCTGATGAACCACTTGCTATCATGAAACCAGAGATTGTC  
TTTTTTGGTGAGAATTTACCAGAACAGTTTCATAGAGCCATGAAGTATGACAAAGATGAA  
GTTGACCTCCTCATTGTTATTGGGTCTTCCCTGAAAGTAAGACCAGTAGCACTAATTCCA  
AGTTCCATACCCCATGAAGTGCCTCAGATAATAATTAAGGGAACCTNTCCCTCATCTG  
CATTTTGATGTAGAGCTTCTTGGAGACTGTGATGTCATACTAATGAATTGTGTCATAGG  
CTAGGTGGTGAATATGCCAACTTTGCTGCAGCCCCGTAAGCTTTCAGAAATTACTGAA  
AAACCTCCCCGAACACAAAAAGAGTTGGCTCATTGTGAGAGTTGCCACCCACACCTCTT  
AATATTTCAGAAGACTCAAGTTCACCAGAAAGAACTTCACCACCAGATTCTTCAGTGGTT  
GTTACTTTTTAGACCAAGCAACTAAGAGTAATATTGATGATTGATGATGTCGCAATCA  
AAAGGATGTGTGGAAGAAAAATCACAGGAAGTACAGATTTCTACTAGGAACACTGAAAGT  
ATTACTGAACAACCTGGAGAGTCCGGATTTGAAGAAGCTGGCTCCAGTACTGGGGAGAAA  
AATGAAAGAACTTCAGTTGCTGAAACAGTGAGAAAGTGTGGCCATTAGACTTGCAAAG  
GAACAGATTAGTAAGCGGCTTGATGGTAATCAGTATCTGTTTTTACCACCAAATCGTTAC  
ATTTCCATGGCGCTGAGGTGATTGAGATTCTGAAGATGACGCCTTATCCTCCAGTTCT  
TGTGGCAGTAACAGTGATAGTGAACATGCCACAGTCCAAGTTTAGAGGAAGCCATGGAG  
GATGAAAGTGAGATTGAAGAGTTCTACGACGGACTGGAAGATGCTGCTGACGTCCCAGGG  
AGAGCTGGAGCAGCTGGAGCTGGTGGAGGGGGTCAGGAGGCAGTAAATGAAGCTGTGTCT  
GTGAACCAGGGAGCCACAGACATGAGCTGTCCATCAAACGAGTCG

>Flycatcher\_SIRT1

ATGCTTAGAACTTTTTCTTTCAGATCGTATTTGAACTGTACTGGTGGCAGCACCCTG  
CGAAAGTACCTCACAGTACAAACAGATCCAGATAACTTCCTCCTCAGCGATGAAATCATA  
GCCAATGGCTTTCCTCTGTGACAGTATGAGGAAGACAGAGCCTCACATGCAAGTTCC

AGTGA CTGGACCCCAAGACCACGTATAGGTCCCTACACTTTTGTT CAGCAGCATCTCATG  
TTAGGTACAGACCCCCGACGATTCTGAAGGACCTGCTGCCAGAAACCATCCCCCACCT  
GAACTGGATGACATGACTCTGTGGCAGATCGTGATAAACATCCTCTCAGAGCCACCAAAA  
AGGAAGAAGAGGAAAGATATTAACACCATTGATGATGCTGTGAAACTTCTGCAGGAGTGC  
AAGAAGATCATGGTCCTGACTGGAGCTGGGGTGTCAAGTGTCTTGGAATCCCTGACTTT  
AGATCCAGAGATGGCATCTATGCACGCCTTGCTGTAGACTTCCCAGACCTTCCAGATCCT  
CAAGCAATGTTTATAGAGTACTTCAGAAAGGATCCCAGGCCCTTTTTTAAGTTTTCA  
AAGGAAATCTACCCAGGACAGTTCCAGCCCTCTCTGCCACAAGTTCATCGCTTTGATG  
GATAAGGAAGGAAAACCTTCGCAACTATACTCAGAACATAGACACACTGGAGCAGGTG  
GCAGGAATCAAAGGATAATACAGTGTCAAGTTCCTTTGCAACAGCTTCTGCCTGATC  
TGTAATAACAAAGTTGATTGTGAAGTTGTCGAGGAGATATTTCAATCAGGTGGTGCC  
CGCTGTCCCCGCTGTCCCCCGAGGAGCCCTGGCTATCATGAAGCCGGACATTGTGTTT  
TTTGGGGAGAACCTGCCCGAGCAGTTCCACCGTGCCATGAAGTACGACAAAAACGAAGTG  
GATCTCCTCATTGTCTGGTCTTCGCTCAAAGTAAGACCAGTAGCATTGATCCCAAGT  
TCCATCCCCATGAAGTGCCTCAGATCTTAATTAATAGGGAGCCTTTGCCTCATCTACAC  
TTTGACGTGGAGCTCCTCGGAGACTGTGATGTTATAATCAATGAATTGTGTCAGAGGTTA  
GGTAGTGAGTACACAAAACCTTTGCTACAACCTCGGTGAAACTTTTCGAAATCACAGAAAAG  
CCTCCACGGCCGACAAGGAGCTCGAAGCGCTCTCGGCCGAGCTCCCACCAACCCCTCTG  
AACATTTCAGAAGGCTCCAGTTCACCAGAAAGGATGAGCCACCTGATCCTGCAGCAGGG  
TCACAACACCCACCTGAATGTAAGGTAGAAAACCTGTGAGCCTGCCTCAGAACTAAAGGG  
ACCTGCTCCGAGGAGACCTTCAGGACACGCAGGTGTCATCAGAAAACCTGAAAATCCT  
GCTAGTGAGCGAATGAACTCTGAAACAATGAAGGAAAATGGATCTAATGATGGAGAAAAT  
AAAGAAAAGAGTGAAATACTGAAGAAGTGTGGGTAAACAGATCTGCAAAGAACAGATT  
AGCAAAAGGCTGGATGGTACTCAGTATCTGTTTCTGCCACCAACCGCTATATCTTCCAC  
GGTGCTGAGGTGTA CTGGATTCTGAGGACGACATCCTATCTTCCAGCTCTTGCGGCAGC  
AGCAGCGAGAGCGGCTCGTGCCGAGCCAGAGCTTGGATGTGGAGGATGAGAGCGAGATG  
GAGGAGTTCTACAATGGCATAGAGGACGAGGATGCTCCCGAGAGGGAAGAGGAGGCTGCA  
TTCGGGGAGGATGGAGCCGAGCAGGAGGAACTGGCAGCTGAGGAATCAGCCGAGCCGAAC  
GGAGCTGCAGGGACGGAACATCCCAGCGACGCACTG

>Frog\_SIRT1

ATGGCGGACTCAGATCGTGTAGGTTTTCCATTGCCGGCGCTGTGTTAGCTGTCTCAAAA  
GAAAATGGCGAGCCCCTTTCCAAAAGGCAGCGCTTGAAGATACCGCGGGGGTGGGAGC  
CAGCTTGTGGGGGCTGAAAGCGAGGGAAAAGCGGCATTGCCGCCTATAGCTGCTTCTC  
CAGGAGGAAGGCGAGGCCTCTTCGGCAATGAAAGCAAATCCAGAGCGCACAATGGCTCG  
GGCTTTCAGGGCCTTCTTTGGAAACGTATTTGGTACAAGGCCAGGAGGAGGGCGGAGCC  
GAGGAGATGCCAATGGAGACCTGTCCGATCAGGCTGTTGATTACGGAGGGCCCTATACA  
TTTGTTCAGAGGCACTTAATGATGGGAACTGATCCCCGACAATTCTTAAGGATCTGCTC  
CCTGACACTGTAGACCCGTCAGAGTTAGATGATATGACTTTGTGGCAGATAGTTATAAAC  
ATTCTTTCTGACCCACCAAAAACGAAAGAAGCGTAAAGACATCAACACCATTGATGATGCT  
GTGAAACTTTTACAAGAGAGCAAGAAAATAATTGTTTTAACGGGAGCAGGGGTTTTCGGTA  
TCTTGTGGAATACCAGATTTTAGATCAAGAGATGGCATTATGCTCGTCTTGCAAGTGGAT  
TTTCCAGACCTTCTAATCCTCAAGCCATGTTTGATATTGAATACTTCAGGAAAGATCCA  
AGACCATTTTTAAATTTGCTAAAGAAATCTTTCCTGGCCAGTTTCAGCCTTCGTTGTGC  
CACAGATTTATAGCTATGTTGGATAAAGAGGAAAAGCTGCTCAGAAACTATACCCAGAAT

ATAGACACACTTGAACAAGTTGCTGGGATTGAAAAGATTATACAATGTCATGGATCATTT  
GCTGAAGCATCTTGTCTTGTATGTAAATACAAAGTTGACTGTGAAGCTGTTAGAGAGGAC  
ATATTTAATCAGATAGTTCCAAGGTGCCCAAGGTGTTTCATCTGATGAGCCTCTTGCCATC  
ATGAAACCGGACATTGTATTTTTTCGGTGAAAACCTGCCAGAACAGTTTCACAGAGCTATG  
AAATATGACAAAAACGAGGTTGATCTTCTTATTGTTATTGGATCTTCCCTGAAAGTCAGG  
CCAGTAGCATTAAATACCAAGTTCTATTCTCATGAAGTGCCTCAGATACTAATTAATAGG  
GAACCATTGCCTCATTTACACTTCGATATAGAAGTCTTGGAGATTGTGATGTAATTATA  
AACGAGTTATGTCAAAGACTAGATGGGAAATACTCCCAGCTTTGTACCAATTCCTTAAAA  
CTTTCACAAATCACAGAAAAGCCCCCTCGAATACACAAAGGTTTCCTTACCTCACCAGAG  
ACTGTCCCATCTACAGACTTAAACACAGGGCAAAGTCCAGCACTACAAAGCGACCTGCGT  
GGAACAGACTTACAGCTAAGTGTCTTAATACAATGCGCTCATTGAAAAACCCGAGGAA  
GCCTCAAGCTTTCACACAAGTGTAGTGAGGAAAATCTAGAAGTGTGAAGGAAGCTAAC  
ACACAGCTCAGCAATGAGAAAGATCAAGAAACAGCTGAGAAAGATACTGACATTGATTCA  
GCCAAGGATTTGGAAAGTAAATATACAAAAGAAGATCAGCAAGCGCCTAGACAGCACG  
CAGTTTTTATTTTTAGCGCCAAATCGCTATATTTTTACGGCGCAGAAGTGTTCGGAT  
TCAGATGAAGATCTGACATCTAGTTCTGTGGAACAAACAGCGACAGCGAATCTTTACTA  
AGCCCAAGCCTGCATGAGCCTATCGAAGAGGATAGTGATACTGAAGAATGCTTCCATGCT  
AAATATGAGAATGAGACTGATACAGATAACAGGGCAGACTTAGAAAGAGAACCCGAGAGG  
GTTGTACTGTATCAAAGTGATGATCTTCTAGGAATCGATGGTACTACCATGAACTTA

>Fruitfly\_SIRT1

ATGATGGAAAATTACGAGGAAATTCGCTGGGCCACATTAGGTCTAAAGATCTGGGCAAC  
CAGGTGCCAGACTACGCAATTCTATCCGCCAACTAAGTTTGATTTGGCGCGGAAATT  
CTGGCCTCAACGTCAACAGAGGCAGAGGCAGAGGCAGAAGCAACAGCAACAACCACAGAA  
CCAGCAACAAGCGAACTTGCTGGCAAAGCAAATGGTGAATCAAAACAAAAACATTGGCT  
GCCAGGGAAGAACAAGAGATTGGCGCCAATTTGGAGCATAAAACCAAAAATCCCACAAAG  
TCAATGGGCGAGGATGAAGATGACGAGGAGGAGGAGGAAGAGGACGATGAGGAGGAGGAG  
GAGGACGACGAGGAGGGAATCACCGGAACGAGCAACGAGGATGAGGACTCCAGCTCAAAT  
TGCTCCTCATCCGTGGAACCCGACTGGAAGCTGCGCTGTTGCAACGAGAATTTTACACA  
GGTCGTGTGCCGCGCCAGGTTATTGCCAGCATTATGCCGATTTGCCACCGGCCTGGCG  
GGCGACACCGACGACTCCGTGCTGTGGGACTATTTGGCCACCTGTTGAACGAGCCGAAG  
CGGCGCAACAAGCTGGCCTCAGTGAACACCTTCGACGATGTCATCAGTTTGGTCAAGAAA  
TCACAGAAGATCATTGTGCTAACGGGAGCCGGAGTATCCGTCTCCTGCGGCATTCCGGAC  
TTCCGGTCCACCAATGGCATATATGCGCGATTGGCCCATGATTTCCCGATCTGCCCGAT  
CCGCAGGCCATGTTTGATATCAACTACTTCAAGAGGGATCCACGACCGTTTACAAGTTT  
GCCCGCGAGATATATCCCGCGAGTTTCAGCCCTCACCTGCCATCGTTTCATCAAAATG  
CTGGAGACCAAGGGCAAAGTGTGCGCAACTACACACAGAACATCGACACCCTCGAGCGG  
GTGGCAGGCATTACGCGAGTAATCGAGTGTACGGTCTCTTTTCAACGGCCTCGTGACC  
AAGTGTGTTTTCAAGTGCAACGCTGACGCCCTGCGGGCGGACATATTTGCCAGCGAATT  
CCGGTGTGCCGCGAGTGCCAGCCCAATAAGGAGCAGAGCGTGGATGCCTCGGTGGCCGTT  
ACTGAGGAGGAGCTGCGCCAAGTGGTGCAGAACGGCATCATGAAGCCGGATATCGTCTTT  
TTCGGCGAGGGACTGCCGGATGAGTACCACACGGTCATGGCCACCGACAAGGACGTGTGC  
GATCTACTGATCGTGATCGGCTCCTCGCTGAAGGTCCGACCTGTGGCCACATTCCCAGC  
AGCATACCGGCCACGGTGCCGAGATTCTTATCAATCGCGAGCAGCTGCATCACCTTAAG  
TTCGATGTGGAGCTGCTGGGCGACTCCGATGTGATCATCAACCAGATTTGCCACCGGTTG



TCGGACAACGATGATTGCTGGCGGCAGCTGTGCTGCGATGAGTCAGTGCTTACCGAAAGC  
AAGGAGCTAATGCCTCCGGAGCACTCTAATCACCACCTCCATCATCTACTTCACCAC  
CGCCACTGCAGTTCAGAGAGCGAGCGACAGTCGCAACTGGACACGGATACGCAGTCTATT  
AAATCAAATAGTTCGGCGGACTACATACTAGGATCAGCTGGCACCTGCTCGGATAGTGA  
TTTGAGTCATCTACTTTTAGCTGTGGAAAGCGTTCCTACTGCCGCCGAAGCGGCAGCCATC  
GAACGTATTTAAACAGACATACTGGTTGAGCTGAACGAGACCACAGCCCTAAGTTGCGAT  
CGTCTGGGCCTGGAAGGCCCTCAGACAACGGTGGAGAGCTATCGCCATCTTTCCATTGAT  
TCCTCCAAGGATAGCGGCATCGAGCAGTGCAGACAACGAAGCCACGCCTAGCTACGTGCGA  
CCCAGCAATCTTGTTCAGGAGACCAAGACAGTGGCGCCAGCCTGACGCCATTCCACAA  
CAGAGGGGAAAGCGACAGACAGCAGCCGAGCGTCTGCAGCCTGGAACATTCTATTGCGAC  
ACCAACAATCTTGTATGTGTTTCCAGGAGCCCAGGTATTCTGGGACAACGATTACAGC  
GATGATGATGACGAAGAAGAGGAAAGATCACACAATAGACACAGTGATCTCTTTGGCAAT  
GTGGGGCACAATTATAAGGATGATGATGAGGATGCATGTGATCTGAACGCCGTTCCATTG  
TCACCATTGCTACCGCCTTCACTGGAGGCTCACATAGTCACCGATATAGTGAATGGATCC  
AACGAACCGCTGCCAACAGCAGTCCCGGCCAGAAAAGAACCGCCTGCATTATAGAACAG  
CAGCCAACGCCGCTATTGAAACGGAAATCCCCACTAAAGAAGCGGGCAGCAAGTGAG  
GAAAATAAGCAGCAGACCCAAATAGAAAGATCTGAGGAGAGTCCGCCTCCAGGACAGTTA  
GCAGCAGTG

>Fugu\_SIRT1

ATGGCGGATGGAGAGAACAGTCTCGGAATGGCTTCACTGGCGCCTCCGATATGGACGAG  
CCTGTTGTAAAAAGGGCCAAAATGAGTCCGCTGAACCATTACGGATTTCTAGCCACCAA  
GCAGACCAGTTTCCATGCGTCGCCGTGCTACTGAGAGCTGGGAGACGGCGGTGAATTGT  
GCGCACCCAGCAGGGAAGGAAGCGAAGCCGGCGATGGCGGTAGAACAGGCCCCAGTAGCG  
CTAGGCGGAGACAACAATGGACTGGGAATGCTGGTCTCTGAGCCACACAAAACAGTTATG  
AAACGAGAAGACAGCGATGAACTTGGGGCGATTGAGGAGAGTGCTGCTTTTCTGGAGCAT  
GGAGATCTGTCTTGTAAACGGCCTGGCCGTACACCCGAGCACATCCATGAAGACGATGAC  
AGATCCTCACATGCGAGCTCCAGTGACTGGACCCCTCAACCCAGATAGTTTCTACAGT  
TTCATCCAGCAGCACATCAGAGAGACCGATCCAGGGCGATTCTGAGGGACTTGCTCCCC  
GACACCGTGCTCCCACCGATTTAGACGACATGACCCTGTGGCAGATCATCATCAATATC  
TCAGAACCTCCGAAAAGGAAGAAACGAAAAGATGTCAACACTTTAGAAGATGTAGTCAAG  
CTGCTAAAGGAAAGCAAGAGGATCCTTGTCTGACTGGTGCTGGGGTGCTGTTTCTTGT  
GGCATCCCGGATTTTCTGTTCTAGAGATGGAATTTATGCACGCCTTGCTGTAGATTTCCCT  
GATCTTCCAGACCTCAAGCCATGTTTGACATCGAATACTTCAGAAGGGACCCAAGACCA  
TTCTTCAAGTTCGCCAAGGAAATCTACCCTGGTCAGTTCCAACCTTCGCTCTGTCATAAA  
TTCATATCCATGCTGGATAAGCAAGGGAAGCTGCTGCGGAATTACACCCAAAACATCGAC  
ACATTAGAACAAGTAGCTGGAGTTCAGCGGATTATCCAGTGTCACGGTTCATTTGCAACT  
GCGTCTGTCTTGTCTGTAAACACAAAGTAGATTGTGAGGTCATAAGAGAAGACATCTTT  
AACCAGGTTGTCCCTCATTGTTGCGCTGTCTGGATATCCTCTGGCAATCATGAAGCCT  
GATATTGTCTTCTTTGGAGAAAATCTCCAGAAATGTTCCACAGGGCCATGAAGCAGGAT  
AAAGACGAGGTGGACCTCTTGATTGTATCGGTTCTTCACTTAAAGTTTCGGCCGTTGCC  
CTCATCCAAAACCTCATTCTCACGACGTGCTCAGGTCTGATAAATAGGGAGCAACTT  
CCTCACCTCAACTTCGATGTGGAATACTCGGAGACTGCGACGTCATTGTCAACGAGCTC  
TGTCATCAGTTGGGCGTGGAATACGAGCAGCTTTGCTCCAACACTCTAAGACTCAATGAG  
ATCACAGAGAAACCTCCTCGGTTACCAGAACAGTCACCTAATGAGGCCTTGCTGCTCCC

AAGGATGCAGCTCATGTGGAGCAGAAGCAGCACCGCATAGACTCAGTAACCAAGTCTTCA  
CAGGAGGAAGAAACCCCAAGTGTCCCTGAGACCGCCACTAAGATTACTACGCCTCCGCAG  
CCTTGCCCAAATGCTCAGCGTCCAAGTGAAGAGACGACCAAGCCAGCAGAGGGACGCACA  
GAGGCTTCACCAACAGAAGAGCCCACTGAAGTGAAGAACCACACCTTAACCTTCACAGA  
CGATACTGGATGAGTCGGATCAGCAGAAAGTCCAGTCAGCAAACGGCTTGAAACAGGTCAG  
TACCTGTTTCAGGCACCAAATCAGTACATCTTCCACGGGGCTGAGGTGTACTCCGACTCT  
GAAGATGACACGTCCAGCTCCAGGAGCAGCGACAGCGATGAGTCCGAGAGCAGCGCAGAT  
GGCGTGGAGGACGACAGCGACCCAGAGGAGGCGGCAGCACTACCGGAGGACGCAGAGACG  
ACCCTCAGAGACACGATAAACAGTGATGCCACGTCCGGTGTGCAGACAGACAGTACATCA  
GAGAAAACAGAGAGCACCATGCATCTT

>Anole\_lizard\_SIRT1

ATGGCGGACGAGGAGGCGCCGCGCCTCCAGCCCCGCGGCGCCTCAGCCCCGAGCCGGCT  
CCGAAGCGCCTTCGACGGGGGTGGCTGAGGGGGAGGCGGCCGCGCAAGGAGCCGCGGAG  
GAGGAGGCCCCCTGGGCGTGACGGAGGCCGAGGAGGCGAAGACGGGGGCTGGAGCCTC  
TCCGAGAGCGGGCCGAGGCGGTGGGGCCTGGGCCGAAGGGAAGAAGAGCAGGAGGAGGAG  
GAGGAGCGCAACCCGCGGCTGAGCGAGGGGAGGGGGCGGGGGCGGGGGCGGGCGCGC  
GCCGGAGAGGAGGCCGCTCGGGGCCGCCATTGGCTGCGGCGGGCGCAGTCTGCCAAC  
GGAGAGGCCGTGCAAGGAGGAGGAGAGGCCGATAATATATTTTTAGTGATGAAATCATT  
GCAATGGCTTCCATTCTGTGACAGTGATGAAGATGATAGAGCCTCTCATGCAAGCTCA  
AGTGACTGGACCCCAAGGCCACGTATAGGTCCATACACTTTTGTCCAGCAACATCTCATG  
ATAGGAACAGATCCACGTGCAATTCTCAAAGATTTATTGCCAGAAACAATACCTCCCCCT  
GAACTGGATGACATGACATTATGGCAAATCGTAATTAATATTCTCTCAGAACCACCTAAA  
AGAAAAAAGAGGAAAGATTAATACTCTAGAAGATGCTGTGAAACTCCTACATGAGTGC  
AAAAAATAATTGTCTTAAGTGGAGCTGGGGTATCTGTTTCTTGGAATTCCTGATTTCC  
CGATCAAGAGATGGCATTATGCTCGTCTTGACAGTAGATTTCCAGATCTTCTGATCCT  
CAAGCAATGTTTGATATTGAATACTTCAGAAAAGATCCAAGGCCATTTTTAAATTTGCA  
AAGGAAATATATCCTGGACAGTTTCAACCATCCCTTTGTCATAAATTTATAGCTCTGATG  
GATAAAGAAAGAAAATACTGCGCAATTATACTCAGAACATAGATACTCTGGAACAAGTT  
GCAGGAATTCAAAGAATAATCAATGCCATGGTTCCTTTGCAACAGCTTCTTGCCTCATC  
TGTAATACAAAAGTTGATTGTGAAGTTGTCGAGGAGATATTTTAATCAGGTTGTTCTC  
AGATGTCCCAGATGCCACCTGACGAACCACTTGCCATCATGAAGCCAGAAATAGTGTTCC  
TTTGGTGAAAATCTCCCTGAGCAATTTATAGGGCCATGAAGTATGACAAAGATGAGGTC  
GACCTTCTATTGTTATTGGGTCTTCACTTAAAGTAAGACCAGTAGCATTAAATCCAAGT  
TCCATCCCTCATGAAGTGCCTCAGATTCTAATTAATAGGGAACCATTGCCTCATCTACAC  
TTGATGTGGAGCTCCTTGAGACTGTGATGTTATCATCAATGAACTATGTCATAGATTA  
GGTGGTGAATATGCAAACTGTGCAACAGTTCAATCAAACCTTCAGAAATCACAGAGAAG  
CCTCCACGACCACAGAAGGAATTTGAAATACATCCATCAGAGTTGCCACCTACACCACTA  
AACATCTCTGAATATTCTAGTTGCGCTGAGAGAATTGCACCACATGAGTCTCAAATAGTA  
CATTAGAGCACTTCCGAATTTAAAGCAGCAGACTCTGAAGCTACGTTGGAATCTAAA  
GAGAACTGTGTAGAGGAAAAATCTCAAGAGCTACAAAACCTGTTTAGAAAATATTGAAAGT  
CTTCTGACCAGTTAGAAAACCCAGAGCATGTGAAGGAACACGGATCTAACCAAGGTGAA  
AACAAAGAAAGGAGTGAAAAACATCTGTTGAAACACTGAAAAAGTGCTGGGTTAACAGA  
TGTGCAAAAGAGCAAATAAGCAAGCGGCTTGATGGTACCCAATACTGTTTTTACCACCA  
AATCGCTATATTTTTCATGGTGCCGAGGTATATTCAGACTCTGAAGACGATGTCATGTCC

TCCAGTTCTTGTGGAAGTAGCAGTGATAGCGGATCCTGTCATAGTCCGAGTTTAGATGTA  
GAAGATGAAAGTGAACCTGAAGAATTCTATAACGGCATTGAAGATGATGATGTTCTGAC  
AGAGAAGAGGAGAATGGTTTTGGAGAAGATGGAACCTGACATTCAAGAAACTGGTGACGAA  
TCTGTTTCTTTAAATGAGACTGTACGATTTGATCATTGATCAGCAGACACATTG

>Horse\_SIRT1

ATGATTGGCACAGATCCTCGAACAAATTCTTAAAGATTTGCTACCAGAAACAATTCCTCCA  
CCTGAATTGGATGATATGACACTGTGGCAGATTGTTATTAATATCCTTTCAGAACCACCA  
AAAAGGAAAAAAGAAAAGATATTAATACAATTGAAGATGCTGTGAAATTAAGTCAAGAG  
TGCAAGAAAATAATAGTTCTAACTGGAGCTGGGGTTTCTGTTTCTTGGAATACCTGAC  
TTCAGGTCAAGAGATGGTATTTATGCTCGCCTTGACAGTAGACTTCCCAGACCTTCCAGAT  
CCTCAAGCAATGTTTGATATTGAATATTTAGGAAAGATCCAAGACCATTCTTCAAGTTT  
GCAAAGGAAATATATCCTGGACAGTTCCAGCCATCTCTCTGTCACAAATTCATAGCTTTG  
TCAGATAAGGAAGGAAAACTACTTCGCAACTATACTCAGAACATAGATACACTGGAACAG  
GTTGCAGGAATCCAAAGGATAATTCAGTGTACCGTTTCTTTGCAACAGCGTCTTGCCCTG  
ATTTGTAAATACAAAGTTGACTGTGAAGCTGTACGAGGAGATATTTTTAATCAGGTGGTT  
CCTCGATGTCCCAGGTGCCAGCTGATGAACCACTTGCTATCATGAAACCAGAGATTGTT  
TTTTTTGGTGAAAATTTACCAGAACAGTTTCATAGAGCCATGAAATATGACAAAGATGAA  
GTTGATCTCCTCATCGTTATTGGGTCTTCCCTGAAAGTAAGACCAGTAGCACTAATTCCA  
AGTTCCATACCCCATGAAGTGCCTCAGATATTAATTAATAGGGAACCTTTGCCTCATCTG  
CATTTTGATGTAGAGCTTCTTGAGACTGTGATGTCATAATTAATGAATTGTGTCATAGG  
TTAGGTGGTGAATATGCCAACTTTGCTGCAACCCTATAAAGCTTTCAGAAATTAAGTAA  
AAACCTCCACGAACACAAAGAGAGTTGGCTCATTGTCAGAATTGCCACCCACACCTCTT  
AATATTTCAGAAGACTCAAGTTCACCAGAAAGAACTTACCACCAGATTTCGTCCTGATT  
GTCACACTTTTAGACCAAGCAACAAAGAGTAATGTTGATGATCCAGATGTGTCAAATCA  
AAAGATTGTATGGAAGAAAATCACAGGAAGTACAGACATCTACTAGGAGCTTTCAAAGT  
GTTACTGAACGGTTGGGAAGTCCGTATTTGAAGAATGTTGGCTCTGATACTGGGGAGAAA  
AATGAAAGAACTTCAGTTGCTGAAGCAGTAAGAAAGTGTGGCCAGCTAGACTCGCAAAG  
GAGCAGATTAGTAAACGGCTTGATGGTAAGAAAGGCTGT

>Human\_SIRT1

ATGGCGGACGAGGCGGCCCTCGCCCTTCAGCCCGGGCGGCTCCCCCTCGGCGGCGGGGGCC  
GACAGGGAGGCCGCTCGTCCCCCGGGGAGCCGCTCCGCAAGAGGCCGCGGAGAGAT  
GGTCCCGCCTCGAGCGGAGCCCGGGCGAGCCCGTGGGGCGGCCCCAGAGCGTGAGGTG  
CCGCGGCGGCCAGGGGCTGCCCGGTGCGGCGGCGGCGGCTGTGGCGGGAGGCGGAG  
GCAGAGGCGGCGGCGGAGGCGGGAGCAAGAGGCCAGGCGACTGCGGCGGCTGGGGAA  
GGAGACAATGGGCCGGCCTGCAGGGCCATCTCGGGAGCCACCGCTGGCCGACAACTTG  
TACGACGAAGACGACGACGAGGGCGAGGAGGAGGAAGAGGCCGCGGCGGCGGCGATT  
GGGTACCGAGATAACCTTCTGTTCCGGTATGAAATTATCACTAATGGTTTTTCATTCTGT  
GAAAGTGATGAGGAGGATAGACCTCACATGCAAGCTCTAGTGACTGGACTCCAAGGCCA  
CGGATAGGTCCATATACTTTTGTTCAGCAACATCTTATGATTGGCACAGATCCTCGAACA  
ATTCTTAAAGATTTATTGCCGAAAACAATACCTCCACCTGAGTTGGATGATATGACACTG  
TGCGAGATTGTTATTAATATCCTTTCAGAACCACCAAAAAGGAAAAAAGAAAAGATATT  
AATACAATTGAAGATGCTGTGAAATTAAGTCAAGAGTCAAAAAAATTATAGTTCTAACT  
GGAGCTGGGGTGTCTGTTTCATGTGGAATACCTGACTTCAGGTCAAGGGATGGTATTAT  
GCTCGCCTTGTGTAGACTTCCCAGATCTCCAGATCCTCAAGCGATGTTTGATATTGAA

TATTCAGAAAAGATCCAAGACCATTCTTCAAGTTTGCAAAGGAAATATATCCTGGACAA  
TTCCAGCCATCTCTCTGTACAAAATTCATAGCCTTGTGAGATAAGGAAGGAAAACACTT  
CGCAACTATACCCAGAACATAGACACGCTGGAACAGGTTGCGGAATCCAAGGATAATT  
CAGTGTGATGGTTCCTTTGCAACAGCATCTTGCCTGATTTGTAAATACAAAGTTGACTGT  
GAAGCTGTACGAGGAGATATTTTAAATCAGGTAGTTCCTCGATGCCTAGGTGCCAGCT  
GATGAACCGCTTGCTATCATGAAACCAGAGATTGTGTTTTTTGGTGAAAATTTACCAGAA  
CAGTTTCATAGAGCCATGAAGTATGACAAAGATGAAGTTGACCTCCTCATTGTTATTGGG  
TCTCCCTCAAAGTAAGACCAGTAGCACTAATTCCAAGTTCCATACCCCATGAAGTGCCT  
CAGATATTAATTAATAGAGAACCTTTGCCTCATCTGCATTTTGATGTAGAGCTTCTTGA  
GACTGTGATGTCATAATTAATGAATTGTGTCATAGGTTAGGTGGTGAATATGCCAAACTT  
TGCTGTAACCGTGTAAAGCTTTAGAAATTAAGTAAAAACCTCCACGAACACAAAAAGAA  
TTGGCTTATTTGTGAGAGTTGCCACCCACACCTTTCATGTTTCAGAAGACTCAAGTTCA  
CCAGAAAGAACTTACCACCAGATTCTTCAGTGATTGTCACACTTTTAGACCAAGCAGCT  
AAGAGTAATGATGATTAGATGTGTCTGAATCAAAAGGTTGATGGAAGAAAAACCACAG  
GAAGTACAACTTCTAGGAATGTTGAAAGTATTGCTGAACAGATGGAAAATCCGGATTTG  
AAGAATGTTGGTCTAGTACTGGGGAGAAAAATGAAAGAACTTCAGTGGCTGGAACAGTG  
AGAAAATGCTGGCCTAATAGAGTGGCAAAGGAGCAGATTAGTAGCGGCTTGATGGTAAT  
CAGTATCTGTTTTTGCACCAAATCGTTACATTTTCCATGGCGCTGAGGTATATTCAGAC  
TCTGAAGATGACGTCTTATCCTCTAGTTCTTGTGGCAGTAACAGTGATAGTGGGACATGC  
CAGAGTCCAAGTTTAGAAGAACCCATGGAGGATGAAAGTGAATGAGAATTCTACAAT  
GGCTTAGAAGATGAGCCTGATGTTCCAGAGAGAGCTGGAGGAGCTGGATTTGGGACTGAT  
GGAGATGATCAAGAGGCAATTAATGAAGCTATATCTGTGAAACAGGAAGTAACAGACATG  
AACTATCCATCAAACAAATCA

>Macaque\_SIRT1

ATGGCGGACGAGGCGGCCCTCGCCCTTTCAGCCCGGCGGCTCCCCCTCGGCGGCGGGGGCC  
GAGAGGGAGGCCGGTCTCGCCCCCGCGGGGAGCCGCTCCGCAAGAGGCCGCGGAGAGAT  
GGTCTGGCCTCGAGCGGAGCCCGGGCGAGCCCGTGGGGCAGCCCCAGAGCGTGAGGTG  
CCGCGGCGCGGGGGCTGCCGGTTGCGGCGGCGGCGCTGTGGCGGGAGGCAGAGCGGCG  
GCGGCGGGCGGGGAGCAAGAGGCCAGGCGACTGCGGCGGCTGGGGAAGGAGACAATGGG  
CCGGGCTGCAGGGCCCCTCGGGAGCCACCGCTGGCCGACAGCTTCTACGACGAAGAC  
GACGACGACGAGGGCGAGGAGGAGGAAGAGGCGGCGGCGGCGGCGATTGGGTACCGAGAT  
AACCTTCTGTTCCGGTATGAAATTACTACTAATGGTTTTTATTCTTGTGAAAGTATGAG  
GAGGATAGAGCCTCACATGCAAGCTTAGTACTGGACTCCAAGGCCACGGATAGGTCCA  
TATACTTTTGTTCAGCAACATCTTATGATTGGCACAGATCCTCGAACAATTCTTAAAGAT  
TTATTGCCGAAACAATCTCCACCTGAGTTGGATGATATGACACTGTGGCAGATTGTT  
ATTAATATCCTTTGAGAACCACCAAAAAAGGAAAAAAGAAAAGATATTAATACAATTGAA  
GATGCTGTGAAATTAAGTCAAGAGTGCAAAAAAATTATAGTTCTAACTGGAGCTGGGGTG  
TCTGTTTCATGTGGAATACCTGACTTCAGGTCAAGGGATGGTATTTATGCTCGCCTTGCT  
GTAGACTTCCAGATCTTCCAGATCCTCAAGCGATGTTTGATATTGAATATTCAGAAAA  
GATCCAAGACCATTCTTCAAGTTTGCAAAGGAAATATATCCTGGACAATCCAACCATCT  
CTCTGTACAAAATTCATAGCCTTGTGAGATAAGGAAGGAAAACACTTCGCAACTATACC  
CAGAACATAGACACGCTGGAACAGGTTGCGGGAATCCAGAGGATAATTCAGTGTGATGGT  
TCCTTTGCAACAGCATCTTGCCTGATTTGTAAATACAAAGTTGACTGTGAAGCTGTACGA  
GGAGATATTTTAAATCAGGTAGTTCCTCGATGCCTAGGTGCCAGCTGATGAACCGCTT

GCTATCATGAAACCAGAGATTGTGTTTTTGGTGAAAATTTACCAGAACAGTTTCATAGA  
GCCATGAAGTATGACAAAGATGAAGTTGACCTCCTCATTGTTATTGGGTCTTCCCTCAA  
GTAAGACCGGTAGCACTAATTCCAAGTTCCATACCCCATGAAGTGCCTCAGATATTAATT  
AATAGAGAACCTTTGCCTCATCTGCATTTTGATGTAGAGCTTCTTGGAGACTGTGATGTC  
ATAATTAATGAATTGTGTCATAGGTTAGGTGGTGAATATGCCAACTTTGCTGTAACCCT  
GTAAAGCTTTCAGAAATTAAGTAAAAACCCACGAACACAAAAAGAATTGGCTTATTTG  
TCAGACTTGCCACCCACACCTCTTCATATTTAGAACAGACTCAAGTTCACCAGAAAGAACT  
TCACCACCAGATTCTTCAGTGATTGTCACACTTTTAGACCAAGCAGCTAAGAGTAATGAT  
GATTTAGATGTGTCTGAATCAAAGGTCGTATGGAAGAAAAACCACAGGAAGTACAGACT  
TCTAGGAATGTTGAAAGTATTGCTGAACACATGGGAAATCCGGATTTGAAGAATGTTGGT  
TCCAGTACTGGGGAGAAAAATGAAAGAACCTCAGTGGCTGGAACAGTGAGAAAATGCTGG  
CCTAGTAGAGTGGCAAAGGAGCAGATTAGTAAGCGGCTTGATGGTAATCAGTATCTGTTT  
TTGCCACCAATCGTTACATTTCCATGGCGCTGAGGTATATTCAGACTCTGAAGATGAC  
GTCTTATCCTCTAGTTCTGTGGCAGTAACAGTGATAGTGGGACATGCCAGAGTCCAAGT  
TTAGAAGAACCCATGGAGGATGAAAGTGAATGAAAGTCTACAATGGCTTAGAAGAT  
GAGCCTGATATTCAGAGAGAGCTGGAGGAGCTGGATTTGGGACTGATGGAGATGATCAA  
GAGGCAATTAATGAAGCTATATCTATGAAACAGGAAGTAACAGACATGAACTATCCATCA  
AACAAATCA

>Medaka\_SIRT1

ATGGCGGACGACGAGAGCAGCCACCGAGCGCCTTCTCTGGAGCCTGCGTTGCGGACGAA  
CCC GCCGTAAGAGATCGAAAATCACTCCACCGACGACCGCGTCTTCAGATCCATCGAG  
GCGGAGCCGTTTTCTACGTCTCCCCGGCCACGGAGAGCCGGGAGGCGGCGGTGAATTGC  
GAGCAGCGGGCCGAGAGGGAGGCGAAGCCGGCGATGGCGGGGAGCAGGCCCGCAGCGGGC  
GGAGACAACAATGGGCTGGGACTGCTGGGATGCGAGCCGCCGAACCCAGCCGAGAGGCTG  
AGCTTCGGCTTTGTTCTGCTGAGGGGAGAACGGGCTTCTCGGGGCTGACGATCTTCCC  
TCCAACGGTCTCGCCGTCACACCAGAACACCTTAACGACGACGATGACGGATCCTCTCAT  
GCTAGTTCCAGCGACTGGACTCCGCAGCCCCAGATCGGTTCTACAGTCTGATCCATCAG  
CACATCAGAGAGACGACCCAGGGCCATTCTGCGGGACCTGCTGCCCGAGACCATACTC  
CCACCCGATCTGGACGACATGACCCTGTGGCAGATCATCATCAACATCTCAGAACCTCCC  
AAAAGGAAGAAGAGAAAAGACGTGAACACTGTGGAGGACGTGGTCAGACTGCTTCATGAG  
AGCAAGAGGATCATGTTCTGACCGGTGCAGGTGTTTCAGTTTCTGTGGAATCCCCGAC  
TTTCGCTCCAGAGATGGGATTTACGCTCGGCTTGCTGTGACTTTCCCGACCTTCCGAT  
CCGAGTCGATGTTCCGACATCGAATACTCCGACGAGACCCAGACCGTTTTTCAAGTTT  
GCTAAGGAGATCTTCCCCGGGAGTTCCAGCCGTCTCCCTGCCACAGATTTATCGCTATG  
CTGGACAAGCAGGAGAAGCTGCTGCGCAATTACACACAAAACATCGACACGCTGGAACAA  
GTGGCTGGAGTGCAGAAAATCATCCAGTGTACGGATCGTTTGCGACGGCTTCTGTCTC  
GTTTGTAACACAAAGTGGATTGTGAGGCTATAAGGGAGGACATTTTAAATCAGGTTGTT  
CCTCGGTGTCCGCGCTGTTCCGACATTCTCTGGCCATCATGAAACCGGACATTGTGTTT  
TTTGGAGAGAACCTCCAGAGATGTTCCACAGAGCTATGAAGCAGGACAAAGATGAGGTG  
GACCTCCTGATCGTCATCGGATCTTCCCTGAAAGTCCGACCCGTGGCCCTCATCCCAAAT  
TCCATTCCTCATGAAGTGCCTCAGGTTCTGATCAACCGGGAGCCGCTGCCTCACCTGAAC  
TTCGACGTAGAGTTGCTCGGGACTGTGACGGCATCGTCAACGAGCTTTGTCATCGATTG  
GGTGGAGACTTTGAGCCGCTTTGCTTAACTCTTTAAGACTGGCTGAGATCACAGAGAAG  
CCCCCGGTTACCGAAAGGCCTCCAAACGAAACCTCCAGCGATGCCGAGCCGAACGCC

CGTCCTACCGACACCCGCAGACCAACCTTCAGAGGAGGCGGAGAGCCCGCAGGACACGGAC  
GCCGCTCAGAGAAACGCCACGCCCGGAGCCACGCCCTGAAAAGGAGGCGGCAGAGTCT  
CCAGAACGACCCGGTGGAGGACACGCCACGGAGGAGGCAGACGCGTTCAAGAGCCAAGTC  
TCAACGCTGGAAGTACGGAAACGATGTTGGATGAGTCGGATCAACAGAAGTCGATCAGC  
AAACGGCTGGAAGCGGGCCAGTACCTCTTTCAAGCACCGAACCGGTACATTTTCCACGGA  
GCCGAGGTCTACTCCGACTCTGACGACGAGACGTCCAGCTCCTGTGGGAGCGACAGCGAG  
GACTCGGAGGGCAGCGTGGATGGCGTGGAGGACGACAGCGATGCAGAGGAGGACGGAGCA  
GAAGCGGCGGCAGAGGAAGAGGAGTGCCTCAGAGACACATTACCACACAGTCCAGCCAAT  
GAGACGGCAGACGTGCAGATAAACAGAAGCTCTGAACAGACTGAAGGCTTCGCACAGATT

>Mouse\_SIRT1

ATGGCGGACGAGGTGGCGCTCGCCCTTCAGGCCCGCGCTCCCCTCCGCGGCGGCCGCC  
ATGGAGGCCGCGTTCGACGCCGCGGACGAGCCGCTCCGCAAGAGGCCCGCGGAGACGGG  
CCTGGCCTCGGGCGCAGCCCGGGCGAGCCGAGCGCAGCAGTGGCGCCGCGGCGCGGGG  
TGTGAGGCGGCGAGCGCCGCGGCCCGGCGGCGCTGTGGCGGGAGGCGGCAGGGGCGGGC  
GCGAGCGCGGAGCGGGAGGCCCGGCGACGCGCGTGGCCGGGGACGGAGACAATGGGTCC  
GGCCTGCGGCGGGAGCCGAGGGCGGCTGACGACTTCGACGACGACGAGGGCGAGGAGGAG  
GACGAGGCGGCGGCGGCGAGCGGCGGCGGACGATCGGCTACCGAGACAACCTCCTGTTG  
ACCGATGGACTCCTACTAATGGCTTTCATTCTGTGAAAGTGATGACGATGACAGAACG  
TCACACGCCAGCTCTAGTGACTGGACTCCGCGGCCGCGGATAGGTCCATATACTTTTGT  
CAGCAACATCTCATGATTGGCACCGATCCTCGAACAATTCTTAAAGATTTATTACCAGAA  
ACAATTCCTCCACCTGAGCTGGATGATATGACGCTGTGGCAGATTGTTATTAATATCCTT  
TCAGAACCACCAAAGCGGAAAAAAGAAAAAGATATCAATACAATTGAAGATGCTGTGAAG  
TACTGCAGGAGTGTA AAAAAGATAATAGTTCTGACTGGAGCTGGGGTTTCTGTCTCTGT  
GGGATTCTGACTTCAGATCAAGAGACGGTATCTATGCTCGCCTTGCGGTGGACTTCCCA  
GACCTCCAGACCCTCAAGCCATGTTTGATATTGAGTATTTTAGAAAAGACCCAAGACCA  
TTCTTCAAGTTTGCAAAGGAAATATATCCCGGACAGTCCAGCCGCTCTGTGTACAAA  
TTCATAGCTTTGTAGATAAGGAAGGAAAACTACTTCGAAATTATACTCAAATATAGAT  
ACCTTGAGCAGGTTGCAGGAATCAAAGGATCCTTCAGTGCATGGTTCCTTTGCAACA  
GCATCTTGCCTGATTTGTAATACAAAAGTTGATTGTGAAGCTGTTCTGTTGAGACATTTTT  
AATCAGGTAGTTCTCGGTGCCCTAGGTGCCAGCTGATGAGCCACTTGCCATCATGAAG  
CCAGAGATTGTCTTCTTTGGTGA AAAA ACTTACCAGAACAGTTTCATAGAGCCATGAAGTAT  
GACAAAGATGAAGTTGACCTCCTCATTGTTATTGGATCTTCTCTGAAAGTGAGACCAGTA  
GCACTAATCCAAGTTCTATACCCCATGAAGTGCCTCAAATATTAATAAATAGGGAACCT  
TTGCCCTACCTACATTTTGATGTAGAGCTCCTTGGAGACTGCGATGTATAATTAATGAG  
TTGTGTCATAGGCTAGGTGGTGAATATGCCAACTTTGTTGTAACCCTGTAAAGCTTTCA  
GAAATTAAGTAAAAACCTCCACGCCACAAAAGGAATTGGTTCATTTATCAGAGTTGCCA  
CCAACACCTCTTCATATTCGGAAGACTCAAGTTACCTGAAAGAACTGTACCACAAGAC  
TCTTCTGTGATTGCTACACTGTAGACCAAGCAACAACAACAATGTTAATGATTTAGAA  
GTATCTGAATCAAGTTGTGTGGAAGAAAAACCACAAGAAGTACAGACTAGTAGGAATGTT  
GAGAACATTAATGTGGA AAAA ATCCAGATTTTAAAGGCTGTTGGTCCAGTACTGCAGACAAA  
AATGAAAGAACTTCAGTTGCAGAAACAGTGAGAAAATGCTGGCCTAATAGACTTGCAAAG  
GAGCAGATTAGTAAGCGGCTTGAGGGTAATCAATACCTGTTTGTACCACCAAATCGTTAC  
ATATCCACGGTGTGAGGTATACTCAGACTCTGAAGATGACGTCTTGTCTCTAGTTCC

TGTGGCAGTAACAGTGACAGTGGCACATGCCAGAGTCCAAGTTTAGAAGAACCCTTGAA  
GATGAAAGTGA AATTGAAGAATTCTACAATGGCTTGAAGATGATACGGAGAGGCCCGAA  
TGTGCTGGAGGATCTGGATTTGGAGCTGATGGAGGGGATCAAGAGGTTGTTAATGAAGCT  
ATAGCTACAAGACAGGAATTGACAGATGTAACTATCCATCAGACAAATCA

>Naked\_mole\_rat\_SIRT1

ATGGCGGACGAGGCGGCGCTCACCCCTCAGCCCGGCTCCCCCTCGGCAGCGGCGGCCGAG  
AGGGAGGCCGCTCGCCGCTGCCGGGAGCCGCTCCGCAAGAGGCCGCGGAGGGAAGGG  
TCCGTCCTGGGCGGAGCCCAAGCGAGCCAGCGGGGCGGCCGCGGGGGCTGCCGGCG  
GCGGCCGCGGCGCTGTGGCGGAGGCGGCGGCCGTGGCCGGCGGGAGCGAGAAGCCAG  
GGGACAGCCGGGTTAGGAGAAGGAGACAATGGGCCGGCCTGCAGGGCCTAGCCTTGAG  
CTGCCCGGGCGACGACTTCGACGACGAGGACGACGACGACGACGACGACGACGACGAC  
GAGGGTGAGGAGGAGGAAGAGGCGGCGATTGGGTACCGAGATAACCTTCTGTTAAGTGAT  
GACATTATACCAATGGCTTTCATTCTGTGAAAGTGATGACGATGACAGGGCTTCGCAT  
GCCAGCTCTAGTGACTGGACTCCAAGGCCGAGGATAGGTCCATATACTTTTGTTAGCAA  
CATCTCATGATTGGCACAGATCCTCGAACAATTCTTAAAGATTTACTACCAGAAACAATT  
CCACCACCTGAACTAGATGACATGACATTGTGGCAGATTGTCATTAATATCCTTTCAGAA  
CCACCGAAAAGGAAAAAAGAAAAGATATTAATACAATTGAAGATGCTGTGAAATTAAGT  
CAAGAGTGCAAAAAATAATAGTTCTAACTGGAGCTGGGGTATCTGTTTCATGTGGAATA  
CCTGACTTCAGGTCAAGAGATGGTATTTATGCTCGCCTTGCTGTTGACTCCCAGATCTT  
CCAGATCCTCAAGCGATGTTTGATATTGAATATTCAGAAAAGATCCAAGACCATTCTTC  
AAGTTTGCAAAGGAAATATATCCTGGACAGTTCCAACCGTCTCTGTGCATCAGTTCATA  
GCCTTATCAGATAAAGAAGGAAAATACTTCGCAACTATACCCAGAATATAGATACCTTG  
GAACAAGTTGCAGGAATCCAAGGATAATTCAATGTCATGGTTCCTTTGCAACAGCATCT  
TGCTTGATTTGTAGATATAAAGTTGACTGTGAAGCTGTACGAGGAGATATTTTAAATCAG  
GTAGTCCCTCGATGTCCTAGGTGCCACCTGATGAACCACTTGCTATCATGAAGCCAGAG  
ATCGTCTTTTTGGTGAAAATTTACCAGAACAGTTTCATAGAGCCATGAAGTATGACAAA  
GATGAAGTTGATCTCCTCATTGTTATTGGGTCTTCCCTGAAAGTGAGACCAGTAGCTACTA  
ATTCCAAGTTCCATACCCATGAAGTGCCCTCAGATATTAATTAATCGGGAACCTCTGCCT  
CATCTGCATTTTGATGTAGAGCTTCTTGAGACTGTGATGTCATAATTAATGAGTTGTGT  
CATAGGTTAGGTGGTGAATATGCCAACTTTGTTGTAACCCGTAAGCTTTCAGAAATT  
ACTGAGAACTCCACGAACACAGAAAGAGTTGGTTCATTTGTCACAGTTGCCACCAACA  
CCTCTTCATATTTAGAAAGACTCAAGCTCACCAGAAAGAACTTCACCTGATTCTTCAGTG  
ATTGTTAACTTTTAGACCAAGCAACCAAGAGCAGTGTGGATGATTTAGATGGAGCTGAA  
TCAAAAGGCTATGTAGAAGAAAACACAGGAAGTACAGGCTTCTACTAGGAATGCTGAG  
AGTATTAATGTGAAAATCCAGATCTGAAGGACAGTTCCAATACTGCAGAGAAAAGTGGA  
AGAACTTCAGTTGCTGAAACAGTGAGAAAGTGCTGGCCCAATAGACTTGCAAAGGAACAG  
ATTAGTAAGCGCTTGATGGTAATCAATATCTGTTTTTACCACCAAATCGTTACATTTTC  
CATGGCGCTGAGGTGATTACAGACTCTGAAGATGACGTATTGCTCTAGTTCTTGGGC  
AGTAACAGTGATAGTGGCACATGCCAGAGTCCAAGTTTGAAGAGCCCTTGAGGATGAA  
AGTGAAATTGAAGAGTTCTACAATGGCTTGGAGGAGGATCCTGATGCTCCAGAGATCACT  
GGAGGAACTGGATTTGGGGCAATGGAGGTGATCAAGAGGCAGTTAATGAAGCTATATCC  
ACAAAACAGGAAGTAACAGATAGGAACTATCCATCAAACAAATCA

>Opossum\_SIRT1

ATGGCGGATCAGGCGGCGCTCGCCCTGGAGCCCAGCGCAGGCGGCGCAGGTCCCGCGGAG

CCCGGCGGGGAGCCGCTCAGCAAGCGGCAGCGCAGGGACGGACCGGGCCAGGGCCCGGGG  
GCGGAGCGGGCTGTCTGGGGCGGGGAGCCCGGGCCCGGAGGCGGCGGCCCGCCCACTCGGA  
GAGGCCTCGGAGGCAGCCGCCCGGGCGGGGACAATGGGCCCGGCCCGCGGAGCCAGCGG  
GGCCTGCCCCGGGAGCCCGCCCGCGCCCGGACGACGACGACGACGAGGAGGAG  
GACGACGACGAGGAGGAGGAGGAAGAGGGGGCGAGGACGAGGACGAGGCGGCGGCGGCG  
ATTGGCTACCGAGAAAATCTCTTCACTGATGAAACTCTTGCCAATGGCTTTCATTCTGT  
GATAGTGATGAGGATGACCGTGCCTCTCACGCAAGCTCCAGTGACTGGACTCCCAGACCT  
CGAACAGGTCCTTACACTTTTGTGCGAGCAGCATCTCATGATTGGCACAGATCCTCGGACG  
ATCCTGAAGGATCTGCTGCCAGAAACAATCCCACCACCTGAGCTAGATGATATGACTCTC  
TGCCAGATTGTTATCAACATCCTTTCAGAACCACCAAAAAGGAAAAAGAGAAAAGATATT  
AATAACAATTGAGGATGCTGTGAAGTTATTGCAGGAGTGCAAAAAGATCATTGTTCTACT  
GGAGCTGGGGTATCTGTTTCTGTGGAATACCTGACTTCAGATCAAGAGATGGTATTTAT  
GCCCCCTGGCAGTAGATTTCCCCGACCTCCCTGATCCTCAGGCAATGTTTGACATTGAA  
TATTCAGAAAAGGATCCAAGACCATTTTTCAAGTTTGCAAAGGAAATCTATCCTGGGCAA  
TTCCAGCCATCTCTCTGCCATAAATTTATAGCCTTGTCCGATAAAGAAGGAAAACACTT  
CGAAACTACACTCAGAACATAGATACTGGAACAAGTTGCAGGGATTTCAGAGGATAATT  
CAGTGTGATGTTTCTTTGCAACAGCTTCTTGCTTGATTTGTAAATACAAGGTGGATTCT  
GAAGCTGTACGTGAAGATATTTTAAATCAGGTGGTTCCTCGATGTCCCCGGTGTCTGCT  
GACGAGCCACTTGCCATCATGAAGCCAGAGATTGTGTTCTTTGGGGAAAACCTACCAGAG  
CAGTTTCACAGAGCCATGAAGTATGACAAGGATGAAGTCGATCTCCTCATTGTTATTGGG  
TCTTCCCTGAAAAGTAAGACCAGTAGCGCTGATTCCGAGTTCATACCCACGAAGTGCCT  
CAAATCCTGATTAACCGGGAACCTCTGCCTCACCTGCACTTTGACGTCGAGCTTCTGGGG  
GACTGTGACGTCATCATCAACGAGCTCTGCCAGCGGCTCGGCGGCGAGTACGCCCGGCTC  
TGCTCCAACCCGACGAGGCTTTCGGAGATCACGGAAAAGCCTCCACGACCGCAGAGGGAG  
CTGGGCGCCCGCTGGGGAGCGCTGCCGCCACGCCCTCCACGTTTCCGAAGACTCTAGT  
TCCCCGGCAGAACTTCCCCGCCAGACTCTTGGGCAGGTGAGAGGAGAGCCGGGGAGGCC  
GACGATGGGGCCGCATCACGGGGGAGCTGCAGAGCGGACAAGCCGCCACCGGAGGTTTAC  
CCTGCGAGCATCACGGAGCAGCTGGAGGATGCCGGAGCCAACGGTGGGGAGAAAAACGAA  
AGAACTAACGTCGTGGAACCCTGAGGAAGTGTGGCCTAACAGGCTCGCCAAAGAGCAG  
ATCAGTAAGCGGCTTGATGGTAACCAGTACCTCTTTTTACCGCCAAATCGCTATATTTTT  
CATGGCGCCGAGGTGTAAGTACTCAGACTCTGAAGACGACGTCCTGTCTCCAGCTCTTGTGGC  
AGCAACAGTGACAGCGGCACCTGCCGGAGCCCCAGCCTAGAGGAGCCCATGGAGGACGAG  
AGCGAGATGGAAGAATTCTACAACGGCCTGGAGGAGGCCGACGGTCCCGAGAGAGGCCGG  
CCTGCGTGCCTGCGACAAAGAGGACCAGCGCGCGTGGCGAAGCCGCGTCCATCACG  
GACGAGCCGCTGCGATCGACCATCCGTCCAGCAGGTTA

>Orangutan\_SIRT1

ATGGCGGACGAGGCGGCCCTCGCCCTTACGCCGGCGGCTCCCCCTCGGCGGCGGGGGCC  
GAGAGGGAGGCCGCTGTCCTCCCGGGGAGCCGCTCCGCAAGAGGCCGCGGAGAGAC  
GGTCCCGGCTCGAGCGGAGCCCGGGCGAGCCCGTGGGGCGGCCCCAGAGCGTGAGGTG  
CCGGCGGCGGCCGGGGGCTGCCCGGCTGCGGCGGCGGCGCTGTGGCGGGAGGCGGAGGCA  
GAGGCGGCGGCGGGGAGCAAGAGGCCAGGCGACTGCGGCGGCTGGGNAAGGAGAC  
AATGGGCCGGCCTGCAGGGCCATCTCGGGAGCCACCGCTGGCCGACAACTTCTACGAC  
GAAGACGACGACGACGAGGGCGAGGAGGAGGAAGAGGCGGCGGCGGCGGCGGCGGCGGAT  
GGGTACCGAGATAACCTTCTGTTCCGGTGATGAAATTACTACTAATGGTTTTTATTCTGT



GAAAGTGATGAGGAGGATAGAGCCTCACATGCAAGCTCTAGTGACTGGACTCCGAGGCCA  
CGGATAGGTCCATATACTTTTGTTCAGCAACATCTTATGATTGGCACAGATCCTCGAACA  
ATTCTTAAAGATTTATTGCCGAAACAATTCCTCCACCTGAGTTGGATGATATGACACTG  
TGCGAGATTGTTATTAATATCCTTTTCAGAACCACCAAAAAGGAAAAAAGAAAAAGATATT  
AATACAATTGAAGATGCTGTGAAATACTGCAAGAGTGCAAAAAAATTATAGTTCTAACT  
GGAGCTGGGGTGTCTGTTTCATGTGGAATACCTGACTTCAGGTCAAGGGATGGTATTAT  
GCTCGCCTTGCTGTAGACTTCCAGATCTCCAGATCCTCAAGCGATGTTTGATATTGAA  
TATTCAGAAAAGATCCAAGACCATTCTCAAGTTTGCAAAGGAAATATATCCTGGACAA  
TTCCAACCATCTCTGTGCACAAATTCATAGCCTTGTCAGATAAGGAAGGAAAACTACTA  
CGCAACTATACCCAGAACATAGACACGCTGGAGCAGGTTGCAGGAATCCAAGGATAATT  
CAGTGTGATGGTTCCTTTGCAACAGCATCTGCCTGATTTGTAAATACAAAGTTGACTGT  
GAAGCTGTACGAGGAGATATTTTAAATCAGGTAGTTCCTCGATGTCCTAGGTGCCAGCT  
GATGAACCGCTTGCTATCATGAAACCAGAGATTGTGTTTTTTGGTGAAAATTTACCAGAA  
CAGTTTCATAGACCATGAAGTATGACAAAGATGAAGTTGACCTCCTATTGTTATTGGG  
TCTCCCTCAAAGTAAGACCAGTAGCACTAATTCCAAGTTCCATACCCCATGAAGTGCCT  
CAGATATTAATTAATAGAGAACCTTTGCCTCATCTGCATTTTGATGTAGAGCTTCTTGA  
GACTGTGATGTCATAATTAATGAATTGTGTGATAGGTTAGGTGGTGAATATGCCAAACTT  
TGCTGTAACCTGTAAAGCTTTTCAGAAATACTGAAAAACCTCCACGAACACAAAAAGAA  
TTGGCTTATTTGTCAGAGTTGCCACCCACACCTTTCATATTTTCAGAAGACTCAAGTTCA  
CCAGAAAGAAGTTCACCACCAGATTCTTCAGTGATTGTCACACTTTTAGACCAAGCAGCT  
AAGAGTAATGATGATTAGATGTGTCTGAATCAAAAGTTGTATGGAAGAAAAACCACAG  
GAAGTACAAACTTCTAGGAACGTTGAAAGTATTGCTGAACAGATGGAAAATCCGGATTTG  
AAGAATGTTGGTCCAGTACTGGGGAGAAAAATGAAAGAACTTCAGTGACTGGAACAGTG  
AGAAAATGCTGGCCTAATAGAGTGGCAAAGGAGCAGATTAGTAAGCGGCTTGATGGTAAT  
CAGTATCTGTTTTTGCACCAAATCGTTACATTTTCCATGGCGCTGAGGTATATTCAGAC  
TCTGAAGATGACGTCTTATCCTTAGTTCCTGTGGCAGTAACAGTGATAGTGGGACATGC  
CAGAGTCCAAGTTTAGAAGAACCCATGGAGGATGAAAGTGAATTAAGAATTCTACAAT  
GGCTTAGAAGATGAGCCTGATGTTCCAGAGAGAGCTGGAGGAGCTGGATTTGGGACTGAT  
GGAGATGATCAAGAGGCAATTGATGAAGCTATATCTATGAAACAGGAAGTAACAGACATG  
AACTATCCATCAAACAAATCA

>Western\_painted\_turtle\_SIRT1

ATGGCGGACGAGACGACTCTGCTCCTCAACCGCTAGCGGCCGCTGCGCTGCGGCCGAG  
GGTGCCGAGCCCTTCTAAGCGCCAGCGCCTGGACTCGGAAGACGGCGCGGGGGGGG  
TCGGGGAAGGGCCTAGGCCAGAACGAGGGTTGGGACGGCGCCACCACGGGCTCCGCG  
ACTAGGGCGGCGGCGGTGAGGCTGCAGGGGGAGGTAGCGGCGGGCTGGAACGACGGGGAG  
GACGGGGCCGGGCTGCGGGGCCTGCCCCGAGGAGCCGCCTCCGCAGCAGCAGCAACAG  
GGNGAGGGGGCGGAGACGGCGCCAGTGAGACGCGGTGGAGACGGCCATTGGCTACAGA  
CGGTGCGAGTGTTCACACGGGTGCGCCGAGGCGGCTGCCCCGCATCCTGATGACATCCTT  
TTTAGTGATGAAATCATAGCCAATGGTTTCCATTCTGTGATAGTGATGAAGATGACAGA  
GCCTCACGTGCAAGCTCTAGTGACTGGACTCCAAGACCACGTATAGGTCCCTACACTTTT  
GTTCAACAACATCTAATGATAGGCACAGACCCACGGACAATTCTGAAGGATTTGCTACCA  
GAAACGATCCCTCCTGAACTGGATGATATGACTCTGTGGCAGATTGTTATAACATT  
CTTTCAGAACCACCAAAAAGGAAAAAACGAAAAGATATTAATACTATTGAGGATGCTGTG  
AAACTTTTACAAGAGTGCAAAAAAATAATTGTCTTACTGGGGCTGGGGTGTCTGTTCT

TGTGGAATACCTGACTTTTCGATCAAGAGATGGCATCTATGCACGCCTTGCAGTAGATTTT  
CCAGACCTTCCAGATCCTCAAGCGATGTTTGATATAGAATACTTCAGAAAGGATCCAAGA  
CCATTTTTTAAATTTGCAAAGGAAATATATCCTGGACAGTTCCAACCATCTCTCTGTCAT  
AAGTTCATAGCTTTGATGGACAAAGAAGGAAAATACTTCGCAACTATACTCAGAACATA  
GACACACTGGAACAGGTTGCAGGAATCCAAGGATAATTCAGTGTTCATGGTTCCTTTGCA  
ACAGCTTCTGCCTCATCTGTAAATACAAAGTTGACTGTGAAGCTGTTTCGAGGAGACATT  
TTAATCAGGTTGTTCCAAGATGTCCAGGTGTCCACCTGATGAACCACTTGCCATCATG  
AAGCCAGAGATAGTGTCTTTGGAGAAAATACTTACCTGAGCAGTTCCATAGGGCCATGAAG  
TATGACAAAGATGAAGTTGATCTCCTTATTGTTATTGGGTCTTCACTGAAAGTAAGACCA  
GTAGCATTGATTCCAAGTTCCATCCCCATGAAGTGCCTCAGATCTTAATTAATAGGGAA  
CCTTTGCCTCATCTACACTTTGATGTGGAGCTTCTTGGAGACTGTGATGTCATTATTAAT  
GAATTATGTCAAAGGCTAGGTGGTGAATATACAAAATACTTGTATAACTCTGTAAAATACT  
TCAGAAATAACAGAAAAGCCCTCACGAATGCACAAGGAATTTGAAATGCATTCAGCTGAG  
TTACCACCTACCCCTTTAAAAGTTTCTGAAGACTCTAGTTCACCGAACAGAATGACACCA  
CCAGATCCTTTAGTGGTACTTTTCAGAGCATCCAAGTGAAGTTCAGGCAGAAAATGCTGAT  
CGTTCCTCAGAACTAAAGGGAATTGCATGGAGGATAAATTGCAAGAAGTACAAGCATGC  
TCAGAAAATACTGTAAAGTATTACTGGCCAGCTAATGAACTCAGAACATATGAAGGATAAT  
AGATCTAACAAGGAGGAAAATAAAGAGAAAATAAATAACTTCATCAGTTGAAACATTG  
AGAAAATGTTTGGCAAACAGATTTGCAAAAAGAACAATAGCAAGCGGCTTGATGGTACT  
CAATACTTATTTTTACCACCAAATCGCTACATTTTCCATGGGGCTGAGGTATACTCAGAC  
TCTGAAGACGATGTCTATCTTCTAGTCTTGTGGAAGTAGTAGTGATAGTGGTTCTTGT  
CATAGTCCAAGCTTAGATGTTGAAGATGAAAGTGAGATTGAAGAATTCTATAATGGCATG  
GAGGAGGAGGATGCTCCAGAGAGAGAAGAGGAGACTGGATTTGGGGAAGATGGAATTGTT  
CAAGATGCAGTTGGTGAACCAGCTTATATAAATGAAGCTGCAGGAATTGATCGTCCATCA  
AACAAATTG

>Panda\_SIRT1

ATGGCGGACGAGGCGGCGCTCGCCCTTCAGCCCGGCGGCTCCCCCTCGGCGGGACTGCGC  
ATCCCCTCCTCCTCTCGGGGCTCTTCTGGTGTGGTGTGGGGGGGGTCTCTGAGGCG  
GGCTGGGGGCTCAGATCTGTTCTGCGGCGTCCCTCTCCCCACCGCGGCCTCAACTGTG  
CGCCTTACGGCCGGTGGCCGGGCTGCGGGGAGCGGCCGATGTAATCCCTCCCTCGGCT  
CCGTCTTCCCTCCCTCCGCGGCCGCTGCGGCGGCTCGCGCTTTGCGCAGCCGCCGGG  
CGGGGAAGCTCCCGCATTACTTTGGTCTTTTGCAGATGACCTTCTGTTTGTATGATGAA  
ATAATACCAATGGTTTTCTTCTGTGAAAGTGATGAGGATGATAGAGCCTCACATGCA  
AGCTCTAGTGACTGGACTCCAAGGCCACGGATAGGTCCATATACTTTTGTTCAGCAACAT  
CTCATGATTGGCACAGATCCTCGAACAATTCTTAAAGATTTACTACCAGAAAACAATTCCT  
CCACCTGAATTGGATGATATGACTGTGGCAGATTGTTATTAATATCCTTTCAGAACCA  
CCAAAAAGGAAAAAAGAAAAGATTAATACAATTGAAGATGCTGTGAAATTAATGCAA  
GAGTGCAAAAAATAATAGTTCTAACTGGAGCTGGGGTTTCTGTTTCTTGTGGAATACCT  
GACTTCAGGTCAAGAGATGGTATTTATGCTCGCCTTGCAATAGACTTTCCAGACCTTCCA  
GATCCTCAAGCAATGTTTGTATTTGAATATTTTCAGAAAAGATCCAAGACCATTCTTCAAG  
TTTGCAAAGGAAATATATCCTGGACAGTTCCAACCATCTCTCTGTCAAAAATTCATAGCC  
TTGTGAGATAAAGAAGGAAAATACTGCTTCGGAATACTCAGAACATAGATACTGGAA  
CAGGTTGCAGGAATCCAAGGATAATCAATGTCATGGTTCCTTTGCAACAGCATCTTGT  
CTGATTTGTAAATACAAAGTAGACTGTGAAGCTGTACGAGGAGATATTTTTAATCAGGTG

G TTCCTCGTTGTCCTAGGTGCCAGCTGATGAGCCACTTGCTATCATGAAACCAGAGATA  
G TCTTTTTTGGTGAAAATTTACCAGAGCAGTTTCATAGAGCCATGAAGTATGACAAAGAT  
G AAGTTGATCTCCTCATTGTTATTGGGTCTTCCCTGAAAGTAAGACCAGTAGCCTAATT  
C CAAGTTCATACCCCATGAAGTGCTCAGATTAATAAATAGAGAACCTTTGCCTCAT  
C TGCAATTTGATGTAGAGCTTCTTGAGACTGTGATGTTATAATAAATGAATTATGTCAT  
A GGTTAGGTGGTGAATATGCCAAACTTTGCTGCAACCCTGTAAAGCTTTCAGAAATTACT  
G AAAAACTCCACGAACACAAAAAGAGTTGGCTCATTGGCAGAGTTGCCACCGACACCT  
C TTAATATTTCAGAAGACTCAAGTTCACCGAAAGAACTTCACCACCTGATTCTTCAGTG  
A TTGTTACACTTTTAGACCAAGCACGTAAGAGTAATGTTGATGATCCTGGTGTGTCCAAA  
T CAAAAGATTGTATGGAAGAAAAGTCACAGGAAGGACAGAATTCTAGGAACATTGAAAGT  
G TTAAGTGAACAGTTGGAAAGTCCAGATTTGAAGAATGTTGGCTCTAACACTGGGGAGAAA  
A ATGAAAGAACTTCAGTTGCTGACACAGTGAGGAAGTGCTGGCCAGCTAGACTTGCAAAG  
G AGCAAATTAGCAAACGGCTTGATGGTAACCAAGTATCTGTTCTTACCACCAAATCGTTAC  
A TTTTCCATGGCGCTGAGGTATATTCAGACTCTGAAGATGACGTCTTATCCTCTAGTTCT  
T GTGGTAGTAACAGTGATAGTGGAACGTGCCAGAGTCCAAGTGTAAGAACAACACTTGGAG  
G ATGAAAGTGAGATTGAAGAATTTACAATGGTTTGAAGATGAAGCTGATGTTAATGAG  
A GAGCTGGAGGAACTGGATTTGAATTGCTGGAGGTGATCATGAGGCAGTCAGTGAAGCT  
A ATATCCATGAAACAGGAAGTAACAGACATTAACATCCATCAAACAAATCA

>Piegon\_SIRT1

A TGATTCCTTATAACTTCCTTTTTAGTGATGAAATCATAGCCAATGGTTTTCACTCCTGT  
G ACAGTGATGAAGATGACAGAGCCTCACATGCAAGTTCTAGTACTGGACCCCAAGACCA  
C GTATAGGTCCCTACACTTTTGTGCAGCAGCATCTCATGTTAGGTACAGACCCACGGACC  
A TTCTGAAAGACCTGCTGCCAGAAACCATCCCTCCACCGGAACTGGATGATATGACGCTG  
T GGCAAATTGTTATAAACATTCTTTCAGAACCACAAAAAGGAAAAAACGGAAAGATGTT  
A AACTATCGATGATGCCGTGAAACTTTTACAAGAATGCAAAAAATAATGGTCCTGACT  
G GAGCTGGGGTGTGAGTGTCTTGTGGAATACCTGACTTTAGATCCAGAGACGGCATCTAT  
G CACGCCTTGTGTAGACTTCCCAGACCTGCCAGATCCTCAAGCAATGTTTGATATAGAA  
T ACTTCAGAAAGGACCCAGGCCATTTTTAAGTTTGCAAAGGAAATTTATCCAGGACAG  
T TCCAGCCATCTCTGTGACAAGTTCATAGCTTTGATGGACAAAGAAGGAAAACTACTT  
C GCAACTATACTCAGAACATAGACACATTGGAACAGGTTGCAGGAATCAAAGGATAATA  
C AGTGTGATGGTTCCTTTGCAACAGCTTCTGCCTGATCTGTAAATACAAAGTTGATTGT  
G AAGTTGTCCGAGGAGACATTTTCAATCAGGTTGTCCCTAGATGTCCCAGATGTCCACCT  
G ATGAGCCCCTCGCTATCATGAAGCCGATATCGTGTCTTTGGAGAGAACTTGCCTGAG  
C AGTTCATCGCGCCATGAAGTACGACAAAAATGAAGTTGATCTCCTTATTGTCATTGGG  
T CTCTACTGAAAGTAAGACCAGTAGCATTGATTCCAAGTTCCATCCCCATGAAGTGCT  
C AGATCTTAATTAATAGGGAACCTTTGCCTCATCTACACTTTGACGTGGAGCTTCTTGG  
G ACTGTGATGTTATTATTAACGAATTATGTCAACGGCTAGGTAGCGAATATACAAAACCT  
T GCTACAACCTCAGTAAAACTTTCCGAAATAACAGAAAAGCCTCCTCGAACGCACAAGGAG  
C TGGAATGCACTCGGCCGAGCTCCCACCCACCCCTCTCAACATTTGGAAGACTCTAGT  
T CACCAGAAGGAACGACCCACCAGACGCTTCGGTTGTGTCTGCAGAACTGCCAGCAGAA  
T GCAAGGCAGAAAACCTGCGATCCTGCCTCGGAAACTAAAGGGACCTGCACAGAGGAAAAG  
C TTCAGGACACACAGACATCGCCAGAAAACCTTGACAATCCCACTAGTGAATTAATGAAC  
T CTGAAACAATGAAGGAAAATGGATCAACAGTGGAGAAAATAAAGAAAAAATGAAATA  
T TGAAGAAGTGCTGGGTAAACAGACCTGCAAAAGAACAGATTAGCAAAGGCTGGATGGA

AATTTTTTTGTAATTCATAATAGGTTTTATAACCAG

>Pig\_SIRT1

ATGGCGGACGAGGCGGCGCTCGCCCTTCAGCCCGGCGGCTCCCCCTCGGCGGTGGCGGCT  
GAGAGGGAGGCCCGCTCGCCCCCGCGGGGAGCCGCTCCGCAAGAAACCGCGGAGAGAC  
GGCCCCGGCGTCGGGCGGAGCCCGGGCGAGCCTGGTGGGGCGGCCTTGGAGCGTGAGCTG  
CCGGCGGCGGCGGGCGGCTGCCCGGCGGCGGCGGTGCTGTGGCGGGAGACCGCTGCGGGC  
GGGAGCGGGAGGCCAGGCGGCTGCGGCGGCAGGAGAAGGAAACAATGGGCCGGGCTTA  
CAGGGCCTATCCCGGGAGGCGCCCCGCGGACGACTTCTACGACGACGACGACGACGAC  
GAGGGCGAGGAGGAGGAAGAGGCGGCGGCAGCGGCGGCTATTGGGTACCGAGATAACCTT  
CTGTTTGGTGTGAAAATCGTACCAATGGTTTCCATTCTTGTGAAAGTGATGAGGATGAT  
AGAGCCTCACATGCCAGTTCTAGTACTGGACTCCAAGACCACGGATAGGTCCATATACT  
TTTGTTCAACAACATCTCATGATTGGCACAGATCCTCGAACAATTCTTAAAGATTTGCTA  
CCAGAAAACAATTCCTCACCTGAATTGGATGATATGACTGTGGCAGATTGTTATTAAT  
ATCCTTTCAGAACCAACAAAAAGGAAAAAAGAAAAGATTAATACAATTGAAGATGCT  
GTGAAATTAACAAGAGTGCAAAAAATAATAGTTCTAACTGGAGCTGGGGTTTCTGTT  
TCTTGTGGAATACCTGACTTCAGGTCAAGAGATGGCATTATGCACGCCTTGCAGTAGAC  
TTTCCAGACCTTCTGATCCTCAAGCAATGTTTGATATTGAATATTCAGAAAAGATCCA  
AGACCATTCTCAAGTTTGCAAAGGAAATATATCCTGGACAGTTCCAGCCATCTCTGT  
CACAAATTCATAGCCTTGTGAGATAAGGAAGGAAAAGTCTTCGCAACTATACTCAGAAC  
ATAGATACTGGAACAGTTGCAGGAATCCAGAGGATAATCCAGTGTGATGGTTCCCTT  
GCAACAGCATCTTGCCTGATTTGTAAATATAAGTTGACTGTGAAGCTGTACGAGGAGAT  
ATTTTAATCAGGTGGTTCCTCGATGTCCTAGGTGCCAGCTGATGAACCACTTGCTATC  
ATGAAACCAGAGATTGCTTTTTTGGTGAAATTTACCAGAGCAGTTTCATAGAGCCATG  
AAGTATGACAAAGATGAAGTTGATCTTCTATTGTTATTGGGTCTTCCCTGAAAGTAAGA  
CCAGTAGCACTAATCCAAGTTCCATACCCCATGAAGTGCCTCAGATATTAATTAATAGG  
GAACCTTTCCTCACCTGCATTTTGATGTAGAGCTTCTGGAGACTGTGATGTCATTATT  
AATGAATTGTGTCATAGGTTAGGAGGTGAATATGCCAAGCTTTGCTGCAACCCTGTAAAG  
CTTTCAGAAATTAAGAAAAGCCTCCACGAACACAAAAAGAGTTGGCTCACTTGTGAGAG  
TTACCACCCACACCTCTTAATATTTCAGAAGGCTCTAGTTCACCAGAAAGAACTTCACCA  
CCAGCTTCTCAGTACTCTCCCTCTTTAGACCAAGCAACAAAGAGTAATGTTGATGAT  
CTAGATGTGCTGAGTCAAAGACTGTGTTGAAGAGAAATCACAGGAAGTACAGACTTCT  
AGGAGCATTGAAAGTGTTAAAGAACCGATGGAGAGTCCAGGTTTGAAGAATGTTGCCTGC  
AGTAATGGAGAGAAAAATGAAAGAACTTCAGTTGCCGAAACAGTAAGAAAATGCTGGCCA  
GCTAGACTTGCAAAGGAGCAGATTAGTAAACGGCTTGATGGTAATCAGTATCTGTTTTTA  
CCACCAAACCGTTATATTTCCATGGCGCTGAGGTATATTCAGACTCTGAAGATGATGTC  
TTATCCTCTAGTTCTTGTGGCAGTAACAGTGAGAGTGGAACCTTGCCAGAGTCCAAGTCTA  
GAAGAACCCATGGAGGATGAAAGTGAGATTGAAGAATTTACAATGGTTTGAAGATGAT  
GCTGATGTTAATATGCGAGCTGGAGGAACTGGATTTGGAGCTGATGGAAGTGACCAAGAG  
GCAGTTAATGAAGCTATATCCATGAAACAGGAAGCAACAGGCGTAACTATCCATCAAAC  
AAATCA

>Platypus\_SIRT1

ATGCCCCAAAGAGGCACTGGCGACCGATTGGGGACGGGGACGGGGGACTCTGGGTGCC  
ACCCGGCCGAGGCCCTGCCAGGAAATCTATCCTGGGCAGTTTCAACCATCTCTGTGC  
CACAAGTTTATCGCCTTGTGCGATAAGGAAGGAAAATTACTTCGCAACTACACTCAGAAT

ATAGATACTGGAACAAGTTGCAGGGATCCAAAGAATAATTCAGTGCATGGTTCCTTT  
GCGACAGCTTCATGCCTGATTTGTAATACAAAAGTTGACTGTGAAGCTGTACGAGGAGAC  
ATTTTTAATCAGGTTGTTCTAGATGTCCAGATGCCAGCTGATGAGCCACTTGCCATC  
ATGAAGCCAGAGATTGTGTTTTTTGGGAAAATTTACCAGAGCAATTCATAGGGCCATG  
AAGTATGACAAAGATGAAGTTGACCTCCTCATTGTTATTGGGTCTTCCCTGAAAGTAAGA  
CCAGTAGCGCTGATCCGAGTTCATACCCACGAAGTGCCCTCAGATCTTGATTAATAGG  
GAACCGTTACCTCATCTGCATTTTGATGTAGAGCTTCTTGAGACTGCGATGTCATCATT  
AATGAATTGTGTGAGAGGCTGGGAGGGGAATACACGCAACTCTGCTCCAACCCCGTAAAG  
CTCTCGGAAATCACGAAAAGCCTCCACGCACACACAAGGAGCTTGAAGCTCGGTGGGCC  
GCGCTCCCCCGACCCACTCCACGTGTGAGAAGGCTCGAGCTCGCCCGACCGAACCTCG  
CCGCCAGATGCCTTGCGGGCTCCCGCCCGCCCGAGCAGATGACTGACAGCCGAGTGGTG  
CAAGTCGAATCGGGGGCGGAGGCAGGAGGGTGCCCCGGGGGGCGGCCCGCAGGCAGGG  
CAGTCATCTCCGAAAGCGCCGCCCTGTGAGCCAGCAGTTGGAGGGTTTGGATCGTACG  
AAGGACGCCGCTGCCAGCATTGGGGAAAATAAGAGAGGAATGAAAGAACTTCAGCTGCG  
GAAACTGAGAAAATGCTGGGGCAGTAGGCTTGCAAAGAGCAGATTAGTAAGCGGCTT  
GATGGGAACCAGTACCTGTTTTTACCACCGAATCGCTACATTTCCACGGGGCTGAAGTA  
TACTCCGACTCTGAAGATGACATCCTGTCTCCAGCTCTTGTGGAAGTAATAGTGACAGT  
GGGACCTGCCATAGTCCAAGCTTAGAAGAACCTCTAGAGGATGAAAGTGAGATTGAAGAA  
TTCTATAACGGCTTAGAGGATGACGCTGTCCGTCCTGAGAGAGGAGGAGGAGGAGCAGCA  
GCTGGATTTGGGGGTGACGATGATGAACAAGAGGCAGTTACCGAAGCCGTGTCTGTGAAA  
GTCGAGGCAGCAGAAATGGACCATTCATCAAATGGCTTA

>Rabbit\_SIRT1

ATGGCGGACGAGGCGGCGCTCGCCCTTCAGCCTGGCGGCTCCCCGTGGCTGCGGCGGCC  
GAGAGGGAGGCCGCTTCGCCGCTGCTGGAGAGCCGCTCCGCAAGAGGCCGCGGAGAGAC  
GGCCCTGGCCTCGGGTGAGCCCCGGCGAGTCCGGCGGGCCGGCCCCGAGCGTGAGGTG  
CCGGCGGCGGCGGCGGGGAGCTGCCCGGCTGTGGCGGCGGCGCTGTGGCGGGAGGCG  
GAGGCGGCGACGGCGACGGGCGGGGAGCGAGAGGCCAGGCTATGGTAGCGGCCGAGGA  
GACAATGGGCTGGCCTGCAGGGCTACTCCGGGAGCTGCCGCGGCCGACGATTCTGC  
GAAGACGAAGACGACGACGACGAGGGCGAAGAGGAGGAAGAGGCGGCGGCGGGATTGGG  
TACAGAGATAATCTTGTTCGGTGATGAAATTATCACTAATGGCTTCACTCATGTGAA  
AGCGATGACGACGACAGAGCCTCACATGCAAGCTCTAGTACTGGACTCCAAGGCCACGG  
ATAGGTCCGTATACTTTTGTTCAGCAGCATCTCATGATTGGCACAGATCCTCGAACAATT  
CTTAAAGATTTACTACCAGAAACAATTCCTCCGCTGAACTGGATGATATGACTGTGG  
CAGATTGTTGTTAATATCCTTTCAGAACCAACAAAAAGGAAAAAAGAAAAGATATTAAT  
ACAATTGAAGATGCCGTGAAATTAAGTCAAGAGTGCAAAAAAGTAATAGTTCTAACTGGA  
GCTGGGGTGTCTGTTTCATGTGGAATACCTGACTTCAGGTCAAGAGATGGTATTTATGCT  
CGCCTTGAGTAGACTTCCAGATCTTCCAGATCCTCAAGCAATGTTTGATATTGAATAT  
TTCAGAAAAGATCCTCGGCCATTCTTCAAGTTTGCAAAGGAAATATATCCTGGACAGTTT  
CAACCGTCTCTCTGTCACAAATTCATTGCCTTGTGAGATAAGGAAGGAAAACCTTCTCGC  
AACTATACCCAGAACATAGACACTCTTGAACAGGTTGCAGGAATCAAAGGATAATTCAA  
TGTCATGGTTCCTTTGCAACAGCATCTTGCTGATCTGTAAATACAAAGTTGACTGTGAA  
GCTGTACGAGGAGATATTTTAAATCAGGTAGTTCCTCGATGTCCTAGGTGCCAGCTGAT  
GAACCACTGGCTATCATGAAACCAGAGATTGTCTTTTTTGGTGAAAACCTTACCCGAACAA  
TTTCATAGAGCCATGAAGTATGACAAAGATGAAGTTGATCTCCTCATTGTTATTGGGTCT

TCCCTGAAAGTAAGACCAGTAGCACTAATTCCAAGTTCATACCCACGAAGTGCCTCAG  
ATATTAATTAATAGGGAACCTTTGCCTCATCTACATTTTGATGTAGAGCTTCTTGGAGAC  
TGTGATGTCATAATTAATGAACTGTGTACAGGCTAGGTGGTGAATATGCCAAACTTTGC  
TGCAACCCTATAAAGCTTTCAGAAATTACTGAAAAACCTCCACGAACACAAAAAGAGTTG  
GTTCAATTTGTCAGAGTTGCCACCAACACCTCTACATATTTAGAAAGATTCAAGTTCACCA  
GAAAGAACTTACCACCAAATTCTTCAATGATTGTTAAGCTTATAGACCAAGCAACTAAG  
AGTAATGTGGACGATTGAGATGTCTCTCAATCAAAGTTTGTATGGAAGAAAAATCACAG  
GAAGTACAGACTAATCCTAGGAATACTGAAAGTGTCACTGAACAGGTGGAAAATCCGGAT  
ATGAAGAGTGTGGTTCCAATGCTGGGGAGAAAAATGAACGAACCTCAGTTGCTGACACA  
GTGAGAAAGTGTGGCCAGCAGAATTGCAAAGGAACAGATTAGTAAGCGGCTCGATGGT  
AATCAGTATCTGTTTTTACCACCAAATCGTTATATTTTCCATGGCGCTGAGGTATATTCA  
GACTCTGAAGATGATGTCTTATCCTCTAGTTCTTGTGGAAGTAACAGTGATAGTGGCACA  
TGCCAGAGTCCAAGTTTAGAAGAACCACTGGAGGATGAAAGTGAGATTGAAGAATTCTAC  
AATGGCTTGAAGATGATGTTGATGTTCCAGAGAGACCTGGAGGAACTGGATTTGGGGCT  
GATGGAGGTCTTCAAGAGGCAGTTAATGAAGCTGTATCTGTGAAACAGGAAGCAACAGAT  
GTCAACTATCCATCAAACAAATCA

>Tetraodon\_SIRT1

atgggtcacgtgccctatgcaaatgagccagctgtccgggaggaaggctctgctcggcgg  
ccgctctgccccgtaagatggcggatggcgagaacagctctcggaatggcttccgaggc  
gcctctgatatggaccagcctgtcgcgaaaaggccaaaatcagtcgctgaccaactat  
gggttctcagtcgcaaaaggaccagtttccgtcctcgcggttctactggaagctgg  
gagacggcggtgaattgtgctcaccagcggggaagaagcgaagccggcgatggcggtta  
gaacaggccacggctcgtcgtcctagggcgagacaacaatggactggaaatgctggtctcc  
gagccgcataaatcagttatgaaacaaggagcagcgtgtgttgggacgaccgaggag  
agcaccgacttcttgagcacgacgagcttcttgcaacggcctggccgtcactccggat  
cacatcaacgaggacgatgacaggtctccacgccagctccagcagctggcccctcag  
ccccaaatagaatccatcccttcattgcgtactgtctgcatgtgcatattggtgaaaac  
gacgcgaatctgagatttctcgaattgtggcgaggttctacagtttcatccagcag  
catatcagagagacggatcccagggtattctgagagatctgctgcccagactgtgctc  
ccaccagatttagacgacatgacattgtggcagatcatcatcaatatctccgagcctccg  
aaaagaaagaagcgaagagcgtcaacactttggacgatgtagtgaagctactgaaggaa  
agcaaaaggatcctgtattgaccggtgctgggggtgctgttcttgcggcataccagac  
ttccggtccagagatggaatttatgcacgtctgtgctgatttccctgatctccagac  
cctcaagcagatgttgacattgattacttttagacgggaccaaggccgtttttaagttt  
gccaaggaaatctaccgggtcagttccagccttccctgtgcacaaattcatatccatg  
ctggataagcaggggaagctgctgcggaattatacacaattattgacacattagaacaa  
gtggctggagttcagcggattatccagtgctatggttctttgcaactgcatctgtctc  
atctgtaaacacaaagtagattgtgaggtcataagagaagacatcttaaccaggtgtt  
cctcattgttcacgctgccagatattcctctggcaattatgaagcctgatattgtctt  
ttggagaaaatctaccgaaatgttccacagagccatgaagcaggataaagatgaggtg  
gacctcttgattgtcattgttctcacttaagttcggccagttgcccttatcccaaac  
tccattcctcatgaagtcctcaggtcttgataaatagagagcagctgcctcacctcaat  
ttgacgtggagctactcggagactgtgacgtcattgtcaacgagctctgtcaccagttg  
ggtggggaatacagcagctcctcgaacgttctaagactccgagatcacagagaaa

cctcctcggttaccggaacagtcacctaacgaggccttgtctgctcccagggatgcagct  
cacgaggagcaaaagccgcccagctacagactcggtaccaggccttcgcggaaggcagaa  
aactgaatgtcgtgaggccccctgctcatattgttacacctccacagcctgtccaac  
gctcagtgctcaggtgaagaaccgactgagccggtagcgatatgcacagagggctacca  
gcagaagtggccactgaagtaaagaaccaaccctccagccttgaatttcacagacgatgc  
tggatgagtcgaatcagccgaagtccactcagcaaacggcttgagacagaccagtacctg  
ttcttggcaccgaatcagctacatctccacggggctgaggtttactcgactctgaagac  
gacacgtcagctccagcggcagtgacagcgatgagctgaaatgcagcgagatggcgtg  
gacgaagaaagtgaactagaggaggcttcagcactgccaacagatggagaaacacgctt  
agagacataataccagtgacgccacactaagtgtgcagacacttgcacagaaaagacg  
gagagcaccacacatctt

>Tilapia\_SIRT1

ATGCAAATGAGCCAGCTGTCCGAGAGGAAGGCTCCTGCTCAGCGGCTCTGCGGGCTGAAG  
ATGGCGGACGGAGAGAACAGTCTGAAAACGGCCTTTTCGGGCGCTCCGATACGGGGGAA  
CCTCACGCTAAGATTTTCGAAAATCAGTCCAGGGACTAACTATGGACTGAAAGCCGTCGAA  
GCGGACCAGTTCTCGTGCCTCCGCGGCAACTGAGAGCTGGGAGGCGGCGTTGAATTGT  
GCGCAGCCCGCGGAGAAGGAAGCGAAGCCGGTGTATGGCGGTAGAACAGGCCCGGCAGCG  
CTAGGCGGAGACAACAATGGACTGGAAGTATTGCTCTCCGAGACTCACAAGCCAGTGGGG  
AACTTGACGACACCGCTGTCTTTGGCGGAACCGAGGACAGTCCAGATTTTCTTGGGCAC  
GATGATCTCCCTCCAACGGTTTGGCTGTACTCCAGAGCACATCACTGAAGACGATGAC  
AGGTCCTCATGCAAGCTCCAGCGACTGGACTCCTCAACCGCAAATAGGTTCTACAGT  
TTCATCCAGCAGCACATTAGAGAGACAGATCCAAGGGCCATCCTGAGGGATTTGCTGCCT  
GAGACTGTACTCCCACAGATTTAGATGACATGACATTGTGGCAGATCATCATCAACATC  
TCAGAGCCTCCAAAAGAAAGAAGCGGAAAGATATTAATACCTTAGAAGATGTGGTCAGG  
CTACTACATGAAAGTAAAAGGATCCTAGTGCTGACTGGTGCTGGGGTTTCAGTTTCATGT  
GGAATACCAGACTTCCGCTCCAGAGATGGAATTTATGCACGGCTTGCTGTAGATTTTCCA  
GATCTTCCAGATCCTCAAGCTATGTTTGACATTGAGTACTTCAGACGGGACCCTAGACCG  
TTTTTTAAGTTTGCTAAGGAGATTTACCTGGGCAGTTTGAACCTTCTCCCTGTCATAGA  
TTTATATCTATGCTAGATAAGCAAAGAAAGCTGCTGCGCAATTATACACAAAACATCGAT  
ACACTGGAACAAGTGGCTGGGGTTTCAGCGGATTATCCAGTGTACGGGTCATTTGCAACT  
GCATCCTGTCTCGTCTGTAAGCACAAAGTGGACTGTGAGGCTATAAGGGAAGACATCTTT  
AACCAGGTTGTCCCTCATTGTCCACGGTGTCCAGATATCCCCTGGCAATCATGAAACCA  
GACATCGTCTTTTTGGAGAGAACCTTCCAGAAATGTTTCACAGAGCCATGAAACAGGAT  
AAAGATGAGGTGGATCTCTTGATCGTCATTGGCTCTTCACTTAAAGTCCGACCGGTTGCC  
CTCATCCCAAACCTCATTCTCATGAAGTGCCTCAGGTCCTGATCAATCGGGAGCAGCTG  
CCTCATCTCAACTTTGACGTGGAGCTACTCGGGGACTGTGACGTCATTATCAATGAGCTC  
TGTCATCGATTGGGTGGAGACTTTGAGCAGCTCTGCTACAACACTGTAAGATTAAGTAACTGAG  
ATCACAGAGAAACCCCTCGGTTACCAGAACAGCCACCAAGTGAGGCCTTGTCTGCTTCG  
AGTGATGCGACTCAGGAGGAGCAGAAGCAGCACACTACAGACTCAGTAAATATGCCTTCG  
GAGGAGACAGAAAGTCTGAATGTCACAGAGACTGCTGATAATAATGTTACACCTCTAGAG  
CCTTGTCCAAATGCTCAGTGTCCAACGGAGAGCACTGAATCTCCAGAGAAAGGTGCGCCA  
AAAGAGGAGGCAGCCGAACGAAAGAGTCAAACCTCAAACCTTGAATTTCTGACGTTGC  
TGGATGAGTCGAGTTAACAGAACTCCAATCAGCAAACGCTTGAGGCAGGCCAATACCTG  
TTTCAACCACCAAATCACTATATCTTCCACGGGGCAGAGGTTTATTCTGACTCTGAAGAT

GAGACGTCGAGCTCCTGCGGGAGTGACAGCGAGGACTCTGAATGCTGTGCTGAAGGGGAG  
GAAGACGACAGCGAGCCGGAGGATGCCGACATAGTACCAGCAGTGGATGGAGAAACATGC  
CTCAAAGACATAGTACAGCACACTGTAGCCACTGAGGCCACGTCAAGTGTGCAGACAGAC  
AATAATTCTGAAAAGACTGAGAGTACCACCCACCTT

>Turkey\_SIRT1

ATGTTAGGTACGGACCCACGGACAATTTTGAAAGACCTGCTCCCAGAAACAATCCCTCCA  
CCTGAACTGGATGATATGACGCTGTGGCAAATCGTCATAAACATTCTTCCGAGCCGCCA  
AAAAGAAAAAACGAAAAGATATTAATACTATTGATGATGCAGTGAACTTTTACAGGAA  
TGCAAAAAAATCATGGTCTTGACAGGAGCTGGGGTGTCTGTGTCTTGTGGAATACCTGAC  
TTTAGATCAAGAGATGGCATCTATGCACGCCTTGCTGTAGACTTCCCAGACCTTCCAGAT  
CCTCAAGCAATGTTTGATATAGAATACTTCAGAAAGGATCCCAGGCCATTTTTTAAGTTT  
GCAAAGGAAATCTATCCAGGCCAGTCCAGCCATCTCTGCCACAAGTTCATAGCTTTG  
ATGGATAAAGAAGGAAAATTGCTTCGTAATACTCAGAACATAGACACATTGGAACAG  
GTTGCAGGAATCCAAAAGATAATTCAGTGTGATGGTTCCTTTGCAACAGCTTCTGCCTG  
ATCTGTAAATACAAAGTTGATTGTGAAGTTGTTGAGGAGATATTTCAATCAGGTTGTT  
CCTAGATGTCCTCGCTGTCCGCCTGATGAACCACTTGCTATCATGAAGCCTGACATAGT  
TTCTTCGAGAGAAGTACCTGAGCAGTTCATCGTGCCATGAAGTATGACAAAAATGAA  
GTTGATCTCCTTATTGTCATTGGGTCTTCACTGAAAGTAAGACCAGTAGCATTGATTCCA  
AGTTCCATCCCCATGAAGTGCCTCAGATCTTAATTAATAGGGAACCTCTGCCTCATCTA  
CACTTTGATGTGGAGCTTCTTGAGACTGTGACGTTATTATTAACGAATTATGTCAAAGG  
CTAGGTAGTGAATATACAAAACCTTTGCTACAACCTCAGTAAAACCTTCTGAAATAACAGAA  
AAGCCTCCACGAATGCACAAAGAGCTTGAAATGCACTCATCTGAGCTACCACCTACACCC  
TTGAACATTTCTGAAGACTCTGGTTCACCACAACAAATGACTCCACCAGATACTTCGGTG  
GTGCCCTCAGAACATGCAGCTGAATGTAAGATAGAAAACCTGTGATCCTGCTTCTGAAACT  
AAAGGGACCTGCACAGAGGAAAAGCTTCAAGATCCACAGGCATCCTCTGAAAACCTGAA  
ATACTACTAGTGAATTAATGAACTCTGAAACAATGAAGGAAAATGGAACCAACAATGGA  
GAAAGCAAAGAAAAAATGAAATAGTGAAGAAGTGCTGGGTAAATAGATCTGCAAAGAA  
CAGATTAGCAAAGGCTGGATGGTACTCAGTATCTATTTTTACCACCAAATCGCTATATT  
TTCCACGGAGCTGAGGTATACTCAGATTCTGAAGACGATATGATATCTTCTAGCTCTTGT  
GGGAGTAGTAGCGAAAGCGGCTCGTGTGCGAGTCAGAGCTTAGATGTGGAGGACGAGAGC  
GAGATTGAAGAGTTTTACAATGGCATAGAGGATGAGGATGCTCCGAAAGGGAAGAGGAA  
GCTGCATTTGGGGAAGATGGGGTTGAACAAGATGCAGCTGATGAATCAGCTTACACAAAT  
GAAGCTGCAGGGAACGATCATCCAACAAGCAACAAGTTG

>Zebra\_finch\_SIRT1

ATGTTAGGTACAGACCCACGGACGATTCTGAAGGACCTGCTGCCAGAAACGATCCCCCA  
CCTGAACTGGATGACATGACTCTGTGGCAAATCGTGATAAACATCCTTTCAGAGCCACCA  
AAAAGGAAGAAGAGGAAAGATATCAACACCATTGATGATGCTGTGAACTTTTGCAGGAG  
TGCAAGAAGATCATGGTCTTGACTGGAGCTGGGGTGTGAGTGTCTTGTGGAATACCTGAC  
TTTAGATCCAGAGATGGCATCTATGCACGCCTTGCTGTGGACTTCCCAGACCTTCCAGAT  
CCTCAAGCAATGTTTGATATAGAATATTTAGAAAGGATCCCAGGCCATTTTTTAAGTTT  
GCAAAGGAAATCTACCCGGGACAGTTCAGCCATCTCTGTGCACAGGTTTCATCGCTCTG  
ATGGATAAAGAAGGAAAACCTCCGCAACTATACTCAGAACATAGACACACTGGAACAG  
GTTGCAGGAATCCAAAGGATAATACAGTGTGATGGTTCCTTTGCAACAGCTTCTGCCTG  
ATCTGTAAATACAAAGTTGATTGTGAAGTTGTTGAGGAGATATTTCAATCAGGTTGGT



CCCCGCTGTCCCTGCTGCCCCCGAGGAGCCGCTGGCCATCATGAAGCCAGACATCGTG  
TTCTTTGGGGAGAATCTGCCTGAGCAGTTCCACCGTGCCATGAAGTATGACAAAAATGAA  
GTGGATCTCCTCATTGTATTGGGTCTTCACTCAAAGTAAGACCAGTAGCATTGATCCCA  
AGTTCCATCCCCATGAAGTGCCTCAGATCTTAATTAATAGGGAACCTTTGCCTCATCTA  
CACTTCGACGTGGAGCTTCTTGGAGACTGTGATGTCATTATTAATGAATTGTGTCAGAGG  
TTGGGTAGTGAATACAAAACTTTGCTACAACCTCGGTAAAACTTTTCGGAAATCACAGAA  
AAGCCTCCACGGCCGACAAGGAGCTCGAAGCGCTCTCAGCTGAGCTCCCACCAACCCCT  
CTGAACATTTTCAGAAGGCTCCAGTTCACCAGAAAAGGATGAGCCCAGCCAATTCTGCGCGG  
GCGTCAGAACATCCACCGGAATGTAAGGTAGAAAACTGTCAGCCTGCCCCAGAACTACA  
GGGACCTGCTCAGAGGAGACGCTTCAGGACACACAGGTGTCATCAGAAAACCCTGAAAAT  
CCTGCTAGTGAGCTAATGAACTCTGAAACAATGAAGGAAAATGGGTCTAATGATGGAGAA  
AATAAAGAAAAGAGTGAATATTGAAGAAGTGTGGGTAAACAGATCTGCAAAAAGAACAG  
ATTAGCAAAAGGCTGGATGGTACTCAATATCTGTTTTTGGCCACCCAATCGCTATATCTTC  
CACGGTGCTGAGGTCTACTCAGATTCTGAAGACGATATCATATCTTCCAGCTCTTGTGGC  
AGCAGCAGTGAGAGCGGCTCCTGCCGAGTCAGAGCTTAGATGTGGAGGATGAGAGTGAG  
ATGGAGGAGTTTTACAATGGCAGAGGATGAGGATGCTCCCGAGCGGGAAGAGGAGCCT  
GGATTCGGGGAGGATGGAGCCGAACAGGAGGAGTTGGCAGCTGAGGAATCAGCTGAGACA  
AATGAAGCTGCAGGGACTGAACATCCGAGCAACGCGCTG

>zebrafish\_SIRT1

ATGGCGGACGGCGAAAATAAACGGGCCGAATCCGCCGAGCCGGACGAGCCGCTACCGAAG  
AAACCGAGGCTTCTGGAGCTGTCCGGTGATTCCGGAGCACAGCGCGACCGCCGGTGCCGAT  
ACATTGGACGAGAAACCGGCGCGGATGGACGAGTCACAGCAGGCCTTATCGATCAACAAC  
AACAAACAACACTAGACCGACTGAACCCGGGACGCCAGCCGACCCGGAGCCCGAGATCTCC  
GAGTTAACTGATGAAGGTGTTATCCCAATGGTTTTACATCCCCTGATCTTCTTCGGGAC  
GATGATGACTGCTCATCCCGTGCCAGCTCTAGCGACTGGACGCCTCAGCCACAGATTGGG  
TCCTATCGGTTCAATCAGCAGCACATCATGAGAGGAACTGATCCCAGAGCCATTCTGAAA  
GATTTGCTTCTGAAACGGTGCTTCTCCAGACCTGGACGACATGACGCTGTGGCAGATC  
ATCATCAACATCTCTGAGCCGCCAAACGAAAGAAACGAAAGACATCAACACGTTAGAG  
GACGTGGTGCGGCTCCTGAACGAGAGGAAGAAGATTCTGGTGCTCACCGGTGCTGGGGTG  
TCTGTTTCTGTGGGATTCCTGACTTTCGCTCTAGAGATGGTATTTATGCTCGACTCGCT  
GTAGATTTCCAGACCTTCTGATCCTCAAGCCATGTTTGACATCGACTACTTCAGGAGA  
GATCCCAGGCCTTTTTTCAAGTTTGCCAAGGAAATCTACCCCGGACAGTTCCAGCCATCT  
CCATGTCACCGATTATATCAATGCTGGACAAGAAGGGAAGGTTATTGAGAACTACAG  
CAGAATATCGACACACTGGAGCAGGTGGCTGGAATACAGAAGATCATTAGTGCCACGGG  
TCTTTTGCAGCTGCCTCCTGTCTTATCTGTAAGCATAAGGTGGACTGTGAAGCCATAAGA  
GAAGATATATTCAACCAGGTTGTTCTCATTGTCCCAGGTGTCCGTCTGATGTCCCCTAC  
GCCATCATGAAGCCAGACATCGTCTTTTTTGGAGAAAACCTTCCAGAGTTTTTCCACAGA  
GCCATGAAGCAGGATAAAGACGAGGTGGACCTCCTCATCGTGATCGGCTCCTCGCTGAAA  
GTGCGGCCAGTGGCTCTTATACCCAGCTCGATTCTCATGACGTGCCTCAAGTGCTGATC  
AACCGTGAGCCGCTGCCGCATCTGAACTTTGACGTGGAGCTCCTGGGCGATTGTGACGTG  
ATCGTGAACGAACTCTGCCATCGCCTGAACGGAGACTTCCAGCAGCTCTGCTACAATTCA  
TCGCGTCTCAGCGAGATCACAGAGAAACCGGCAGCTCCTGAACACACGGAGAACACGTCT  
GCAGATCACTCTCATGCTGATGCTGAACATATCGAGAACACGTCTGCAGATCACTCTCAT  
GCTGATGCTGAACATATAGAGAACACGTCTGCAGATCGCGATGATGCTAAACATACAGAA

AATACACCTACAGATCACGCTGATGCTGAACATACGAAGAACACGTCTGCAGATCACGCT  
AATGCTGAACATACAGAGAACACATCTGCAGGTCACGTTAATGCTGAACATATAGAGCAC  
ATGTCTAAAGATCATGCTAATCCTAAAGACGATCAGAGCTCACTATCAGTTAATGAAGAG  
GAATTAGCGTCTCCAGCAGCAGAAACACACGCGCTGGACTCTACAGAGATTCAGCACAC  
ACAGAGAGGAGTAAAGAGGCCGATGCTGTGAACACTGATGATGCAGCGTGTGTAAAAGAT  
GAAGAAAACACAGATCGACTGCGCGTGAAATGCGCAGACGCTGCTGGAGGAGCCGAATC  
TGTCAGAGTCCAATCAGCAAACGACTCGGAGCGTCGCAGTATTTATTTCAAGCACCGAAC  
CGTTATGTTTTCCACGGGGCGGAGGTTTACTCGAGCTCAGAGGACGAGAGCTCCAGTTCCG  
TGCGGCAGTGAAAGCGACGGATCTTTCCAGCATGAAGACAGCGAGGTGGAGGAAAACGGT  
GCAGCAATGACGGATAAGGAAACGGACACAGAAACAGTACAGGACAGTGAACACAGACGC  
CTTCAGACACACTGCACACAACACACACAA

>Great\_tit\_SIRT1

ATGAGATTCCACCAAGATAAATTCTCTCCTCAGTGATGAAATTATAGCCAATGGCTTTTAC  
TCCTGTGACAGTGATGAAGAAGACAGAGCCTCACATGCAAGTTCCAGTGACTGGACCCCA  
AGACCACGTATAGGTCCCTACACTTTTGTGCAGCAGCACCTGATGTTAGGTACAGACCCA  
CGGTGATTCTGAAGGACCTGTGCCAGAAACGATCCCCCACCTGAACTGGACGACATG  
ACTCTGTGGCAAATCGTCATCAACATCTTTTCCAGAGCCACCCAAAAGGAAGAAGAGGAAA  
GACATTAACACCATTGATGATGCTGTGAAACTTCTGCAGGAATGCAAGAAGATCATGGTG  
TTGACTGGAGCTGGGGTGTGAGTGTCTGTGGAATACCTGACTTTAGATCCAGAGATGGC  
ATCTACGCACGCCTTGCTGTAGACTTCCCAGACCTTCCAGATCCTCAAGCAATGTTTGAT  
ATAGAATACTTCAAGAAAGGATCCCAGGCCTTTTTTAAAGTTTGCAAAGGAAATCTACCCA  
GGACAATTCCAGCCATCTCTGTGACAAGTTCATCGCTTTGATGGATAAAGAGGGAAAA  
CTCCTTCGCACTATACTCAGAACATAGACACACTGGAACAGGTTGCAGGAATCCAAAGG  
ATAATACAGTGTGATGTTTCTTTGCAACAGCTTCTGCCTGATCTGTAAATACAAAAGTT  
GATTGTGAAGTTGTTGAGGAGATATTTTCAATCAGGTGGTGCCCGCTGTCCCGCTGT  
CCCCCGAGGAGCCGCTGGCCATCATGAAGCCGGACATTGTGTTCTTTGGGGAGAACCTG  
CCCAGCAGTTCCACCGTCCATGAAGTACGACAAAAATGAAGTGGATCTCCTCATTGTC  
ATTGGGTCTTCACTCAAAGTAAGACCAGTAGCATTGATCCCAAGTTCCATCCCCATGAA  
GTGCTCAGATCTTAATTAATAGGGAACCTTTGCTCATCTACACTTTGACGTGGAGCTT  
CTCGGAGACTGTGATGTAATTATTAATGAATTATGCCAGAGGTTAGGTAGCGAATACACA  
AACTTTGCTACAACCTCCGTAACCTTTCCGAAATCACGGAAAAGCCTCCACGGCCGCAC  
AAGGAGCTGGAAGCGCTCTCAGCTGAGCTCCACCAACCCCTCTGAACATTTCAGAAGAC  
TCCAGTTCACAGAAAAGGATGAGCCACCTGAGAGCGCGGCCGTGTCCCAGCACCCACCC  
GAATGTAAGGTAGAAAACCTGTGAGCCTGCCTCAGAACTAAAGGGACCTGCTCGGAGGAG  
ACGCTTCAGGACACGCAGGTGGCGTCAGAAAACCTGAAAATCCTGCTAGTGAGCTAATG  
AACTCTGAAACAATGAAGGAAAATGGATCTAACGATGGAGAAAATAAAGAAAAGAGTGAA  
ATATTGAGGAAGTGTGGGTAAACAGATCTGCAAAAGAACAGATTAGCAAAGGCTGGAT  
GGTACTCAGTATCTGTTTTGCCACCCAATCGCTATATCTTCCACGGTGCTGAGGTTTAC  
TCGGATTCTGAAGACGATATCATATCTTCCAGCTCTTGTGGCAGCAGCAGTGAGAGCGGC  
TCGTGCCGACAGTACAGGCTTAGATGTGGAGGACGAGAGTGAGATGGAGGAGTTTTACAAT  
GGCATAGAGGATGAGGATGCTCCCGAGAGGGAAGAGGAGCCCGATTGTTGGGAGGATGGA  
GCAGAACAGGAGGAATTGGCAGCTGAGGAATCAGCTGAGACAAACGAAGCCGAGGGACG  
GAACATGCGAGCGACGCGCTG

>African\_ostrich\_SIRT1

ATGTCCCTGTTGTGCTGTCTTGCAGATAACTTCCTTTTAGCGATGAAGTCATAGCCAAT  
GGTTTCCATTCTGTGACAGTGATGATGACAGAGCCTCACATGCAAGTTCTAGTGAT  
TGGACTCCAAGACCACGTATAGGTCCTTACTTTTGTTCAGCAACATCTCATGTTAGGT  
ACAGACCCACGGACGATTCTGAAAGACCTACTACCAGAAACAATCCCTCCACCTGAACTG  
GATGACATGACACTGTGGCAAATTGTTATAAACATTCTTTCAGAACCACCGAAAAGAAAA  
AAACGAAAAGATATTAATACTATTGATGATGCTGTGAACTTTTACAAGAATGCAAAAAA  
ATAATGGTCTTGACTGGAGCAGGGTTTCTGTGTCTGTGGAATACCTGACTTCAGATCA  
AGAGATGGCATCTATGCGCGCCTTGCTGTAGACTTCCAGACCTTCAGATCCTCAAGCA  
ATGTTTGATATAGAATACTTCAGAAAGGATCCCAGGCCGTTTTTAAGTTTGCAAAGGAA  
ATATATCCAGGACAGTTCCAACCATCCCTCTGTCAACAAGTTCATAGCTTTGATGGACAAA  
GAAGGAAAATTGCTTCGCAACTATACAAAAACATAGACACCCTGGAACAAGTTGCAGGA  
ATCCAAAGGATAATTCAGTGTACGGTTCCTTTGCAACAGCTTCCTGCCTGATCTGTAAA  
TACAAAGTTGACTGTGAAGTTGTCGAGGAGATATTTCAATCAGGTCGTTCTTAGATGT  
CCCAGATGTCCACCTGATGAACCGTTGCTATCATGAAGCCAGACATAGTGTCTTTGGA  
GAGAACTTACCTGAGCAGTTCCATCGTGCCATGAAGTATGACAAAAACGAAGTTGATCTC  
CTTATTGTTATTGGGTCTTCGCTGAAAGTAAGACCAGTAGCGTTGATTCCAAGTTCCATC  
CCTCATGAAGTGCCTCAAATCTTAATTAATAGGGAACCTTTGCCACATCTACACTTCGAC  
GTGGAGCTTCTGGAGACTGTGATGTATTATTAATGAATTATGTCAAAGGCTAGGTAGT  
GAATATACAAAACCTTTGCTACAACCTCAGTAAAACCTTTCTGAAATAACAGAAAAGCCTCCA  
CGAACACAGAAGGAGCTTGACATGCACTCATCTGAGTTACCACCTACCCCTTTAAACATT  
TCAGAAGACTCTAGTTCACCAGAAAGAACGACTCCACCAGATACTTCGGTGGTGCCCTCA  
GAACACCCAGCTGAATGCAAGGTAGAAAACCTGTGATCCTGCCTCAGAAACTAAAGCGATC  
TGCACAGAGGAGAAGCTTCAGGACACGCAGACATCCTCAGAGAGCCCTGGAAATACTACT  
AGTGAATTAATGAACTCTGAACCAATGAAGGAAAATGGATCCAACAATGGAGAAAATAGA  
GAAAAAATGAAATATTGAGGAAGTGTGGGTAACAGATCTGCAAAAAGAACAGATCAGC  
AAAAGGCTGGATGGTACTCAGTATCTGTTTTACCGCAAATCGCTATATTTCCATGGT  
GCTGAGGTGTACTCGGATTCTGAAGATGATATCATATCTTCTAGCTCTTGTGGCAGTAGT  
AGTGAAAGTGGCTCATGTATAGCCAGAGCTTAGATGTGGAAGATGAGAGCGAGATTGAG  
GAATTCTACAATGGCATAGAGGATGAGGATGCTCCAGAAAGGGAAGAGGAACATGGATTT  
GGGGAAGATGGAGTTGAACCAAGATGCAGCAGATGAATCAGCTTATATAACGAAGCCACA  
GGGACTGATCATCCAACAAGCAACAAGTTG

>Adelie\_penguin\_SIRT1

TATATCTGTGCCATTTGGCTCAAGTGTAACCCGTCATTGTTGTGCTGTCTTGCAGATAAC  
TTCCTTTTAGTGATGAAATCATAGCCAATGGTTTTCACTCCTGTGATAGCGATGAAGAT  
GACAGAGCCTCACATGCAAGTTCTAGTGACTGGACTCCAAGACCACGTATAGTCCCTAC  
ACTTTCGTTACAGCAGCATCTCATGTTAGGTACAGACCCACGGACAATTCTGAAAGACCTG  
CTACCAGAAACAATCCTCCACCTGAACTGGATGATATGACACTGTGGCAAATTGTCATA  
AATATTCTTTCAGAACCACCAAAAAGAAAAAACGAAAAGATATTAATACTATTGATGAT  
GCTGTGAAAACCTTTACAAGAGTGCAAAAAAATAATGGTCTTGACTGGAGCTGGGGTGTCC  
GTGTCTTGTGGAATACCTGACTTTAGATCAAGAGATGGCATCTATGCACGCCTTGCCGTA  
GACTTCCCAGACCTTCAGATCCTCAAGCAATGTTTGATATAGAATACTTCAGAAAGGAT  
CCCAGGCCATTTTTAAGTTTGCAAAGGAAATCTATCCAGGACAATTCCAGCCATCTCTC  
TGTCACAAGTTCATAGCTCTGATGGATAAAGAAGGAAAACCTTCGCAACTATACTCAG  
AACATAGACACATTGGAACAGGTTGCAGGAATCCAAGGATAATACAGTGTATGTTCC

TTTGCAACAGCTTCCTGCCTGATCTGTAAATACAAAGTTGATTGTGAAGTTGTTTCGAGGA  
GATATTTTCAATCAGGTTGTACCTAGATGTCCCAGATGTCCACCTGATGAACTGCTCGCT  
ATCATGAAGCCAGACATAGTGTCTTTGGAGAGAACTTACCTGAGCAGTTCCATCGCGCC  
ATGAAGTATGACAAAAATGAAGTTGATCTCCTTATTGTTATTGGGTCTTCACTGAAAGTA  
AGACCAGTAGCATTGATTCCAAGTTCCATCCCCATGAAGTGCCTCAGATCTTAATTAAT  
AGGGAACCTTTGCCTCATCTACACTTTGACGTGGAGCTTCTGGAGACTGTGATGTTATT  
ATTAATGAATTATGTCAAAGGCTAGGTAGCGAATATACAAAACCTTGTACAACCTCAGTA  
AAACTTTTCAGAAATAACAGAAAAGCCTCCACGAACGCACAAGGAGCTTGAAATACACTCA  
GCCGAGCTACCGCCTACCCCTTTAAACATTTTCAGAAAGACTCTAGTTCACCAGAAAGGATG  
ACTCCACCAGATACTTCAGTGGTGTCTTCAGAACACCCAGCTGAATGTAAGTTAGAAAAC  
TGTGATCTGCCTCAGAAACTAAAGGGACCTGCACAGAGGAAAAGCTTCAGGACACACAG  
ACATCGTCAGAAAACCCTGAAAATCCTACTAATGAATTAATGAACTCTGAAACAATGAAG  
GAAAATGGATCTAACAACGGAGAAAATAAAGAAAAAATGAAATCCTGAAGAAGTGCTGG  
GTAACAGATCTGAAAAGAACAGATTAGCAAAAAGGCTGGATGGTACTCAGTATCTATTT  
TTGCCACCAAATCGCTATATTTTCCATGGTGCTGAGGTTTACTCAGATTCTGAAGACGAT  
ATCGTATCTTCCAGCTCTTGCGGGAGTAGTAGTGAAAAGTGGTTCATGTCTGATGACAGC  
TTAGATGTGGAGGATGAGAGTGAGATCGAAGAGTTTACAATGGCATAGAGGATGAGGAT  
GCTCCTGAAAGGGAAGAGGAACCTGGATTCGGGGAAGATGGAGTTGAACAAGATGAATCG  
GCAGCTGATGAATCAGCTTATGCAAATGAAGCTGCAGGGACTGATCATCCAAGCAACAAG  
TTG

>Gharial\_SIRT1

ATGTTAGGCACAGACCCAAGGACAATTTGAAAGATCTGTTACCAGAAACTATTCTCCA  
CCTGAACTAGATGATATGACACTGTGGCAAATTGTTATAAACATTCTTTCAGAACCACCA  
AAAAGGAAAAAACGAAAAGATATTAATACCATTGAGGATGCTGTGAAACTTTTGCAAGAA  
TGCAAAAAGATTATGGTCTTACTGGAGCTGGGGTGTCTGTGCTTGTGGAATACCTGAT  
TTCCGATCAAGAGATGGCATCTATGCACGTCTTGCAGTAGATTTCCAGACCTTCCAGAT  
CCTCAAGCAATGTTTATGATATAGAATACTTCAGAAAGGATCCAAGACCATTTTAAAGTTT  
GCAAAGGAAATATATCCTGGCAAATCCAGCCATCCCTCTGTCATAAATTCATAGCTTTG  
ATGGATAAAGGAGGAAAGCTACTTCGCAACTACACTCAAAACATAGATACACTGGAACAG  
GTTGCAGGAATCCAAAGGATAATACAGTGTGATGGTTCTTTGCTACAGCTTCTGTCTA  
ATCTGTAAATACAAAGTTGACTGTGAAGCTGTTTCGAGGAGACATTTTAAATCAGGTTGTT  
CCTAGATGTCCCAGATGTCCACCTGATGAACCACTTGCTATTATGAAGCCAGAAATAGTA  
TTCTTTGGAGAGAACTTACCAGAGCAGTTCCACAGGGCCATGAAGTATGACAAAGATGAA  
GTAGATCTCCTTATTGTAATTGGGTCTTCACTAAAAGTAAGACCAGTAGCATTGATTCCA  
AGTTCCATCCCCATGAAGTGCCTCAGATATTAATTAATAGGGAACCTTTGCCCCATCTA  
CACTTTGATGTGGAACCTCCTGGAGACTGTGATGTAATCATTAAATGAACTATGTCAAAGG  
CTGAGTGGTGAATATACAGAACTTTGCTACAACCTCATAAAACTTTCAGAAATAACAGAA  
AAACCACCAGAAATGCACAAGGAGCTTGAATGCATTCAGCTGAGTTACCACCTACCCCT  
TTAAACATTTCTGAAGATTCTAGTTCACCTGAAAGAGCAACTCCCCAACTCTTTGGTT  
GTGCTTTTCAGAGCATCCAACAAAATGTAGGGCAGAAAATTCTGAACTTGCCTCAGACTCT  
AATGGGAACTGCATGGAGAAATCCAGGAGGTACAGACATCCTCAGAAAATCCTGAAAGT  
ATTACTGGCCAGTTAACGAACTTAGAACATCCAAAAGAAAATGGAGCTAACAAATGGAGAA  
CAGAAAGAAAAAATGATATAACTCCGTCGGTTGAAACTTTGAGGAAATGCTGGCCAAAC  
AGATGTGCAAAAAGAACAGATTAGCAAGCGGCTTGTGTTACTCAATACCTATTTTTACCA

CCAAATCGCTATATTTCCATGGTGCTGAGGTGTA CT CAGATTCTGAAGATGATGTCCTA  
TCTTCCAGTTCTTGTGGAAGTAGTAGTGATAGTGGTTCTTGT CATAGTCCAAGCTTAGAT  
GTGGAAGATGAAAAGTGAGATTGAAGAATTCTACAATGGCATGGAGGAAGAGGATGCTCCA  
GAAAGAGAAGAGGAAATTGCATTTGGGGAAGATGGTGTGAAGAAGATGCAGTTGATGAA  
TCAGGTTATATAAATGAAGCTGTAGGGACTGACCATCCATCAAACAAACTG

>Great\_tit\_SIRT2

ATGGTGGGCGCCGGCATCTCCACCTCTGCCGGATCCCGGATTTCCGCTCCCCGGCACC  
GGGCTCTACTCCAACCTGCAGAGTTACAACCTCCCCTACCCGAGGCCATCTTTGAGATC  
GGTTTCTTCAAGAAACACCCAGAGCCCTTTTTCGCCCTGCCCGTGAGCTCTACCCAGGG  
CAGTTCAAGCCCACCGTGTGTCACTACTTTCATGCGGCTGCTGCAGGACAAGGGGCTCTTG  
CTGCGCTGTACACCCAGAACATCGACACTCTGGAGAGGGTGGCAGGGCTGGAGCCGGAG  
CTGCTGGTGGAGGCTCACGGCACGTTCTTACGTGCGACTGCCTGCGCTCCTCGTGCCGC  
CAGCGCTACGACCTGGCCTGGATGAGGGAGAGGATTTCTCCTCCCTGGTCCCGAAATGT  
GAGAAGTGCCAGGGGCTGGTGAAGCCTGACATTGTGTTTTTTGGGAGAACCTCCCCTCG  
CGCTTCTTTACCCTCCTGGAGTCGGACTTTGAGAAGGTTGATCTCCTGCTCATCATGGGC  
ACCTACTGCAGGTGCAGCCCTTTCCTCCCTCATCAGCAGGGTCCCCACCAACACCCCC  
AGACTCCTGATCAACAAGGAGAAGACAGGACAG

>common\_starling\_SIRT2

ATGGAGCTGCTGCGGACGCTCCTGTCCCGACCCTGGGGCTCGGAGGGGACAAACCGGAG  
CCGGTGTGACGAGCTGAGCCTGCAGGGCGTGAGCCGCTTCTGAAGAGTGACCGCTGT  
AAGAACGTCGTGTGCATGGTGGGCGCTGGCATCTCCACCTCCGCTGGGATCCCGGACTTC  
CGTCCCCCGGCACCGGGCTCTACTCCAACCTGCAGAGCTACGACCTCCCCTACCCTGAG  
GCCATCTTCGAAATCGTTTTCTTCAAGAAACACCCGGAGCCCTTTTTCGCCCTGCCCGT  
GAGCTCTATCCAGGGCAGTTCAAGCCCACAGTTTGTCACTACTTTCATGCGGCTGCTGCAG  
GACAAGGGGCTTTTGCTGCGCTGTACACCCAGAACATCGACACTCTGGAGAGGGTGGCA  
GGGCTGGACCCGAACTGCTGGTGGAGGCTCACGGCACATTCTTACGTCCCCTGCGCTG  
CGGCCCTCGTGCCGCCAGCGCTACGGCCTGGCCTGGATGAGGGAGCGGATTTTCTCCTCC  
CTTGTCCCTAAATGTGAGAAGTGCCAGGGGCTGGTGAACCTGACATTGTGTTTTTTGGG  
GAGAGCCTCCCCTCTCGTTCTTTCGCCCTCCTGGAGTCCGACTTTGAGAAAGTTGACCTG  
CTGCTCATCATGGGCACCTCGCTGCAGGTGCAGCCCTTTCCTCCCTTATCAGCAGGGTC  
CCCACCAACACCCCCAGACTCCTGATCAACAAGGAGAAGACGGGGCAGAGTGACCCTCTG  
ATGTCACTGATGGGCTTTGGTGGGATGGACTTTGACTCAGACAAGGCCTACAGGGATGTG  
GCCTGGCTGGGGGACTGTAACAGCGGGTGCCTGGCTCTGGCTGAACTGCTGGGCTGGAAG  
GTACCCCC

>central\_bearded\_dragon\_SIRT2

ATGCTTCATGGGGGTTGTAGTTTTCTGT CAGGTCGAGGCGGAGGGAAGCTGGGGAAGAT  
TGCTCCTCCTTCTCCTTCGGGGCTCGTTTGAGAACCGAGTTCGTGGTGCGGAGAAGGAG  
GGGGGGGACCCTCGATGAAAAACGGGAAGGATCCAGATTCTGATGAAGAAGCTGGGGCT  
TCTGGTCTGACAGAAATGGAATTTTTGAAGAACCTCTTGTCCCGACGCTGAACTTGGGC  
AGTGAAAAACCTGAAAAGGTGCTGGATGAGCTGACGTTGGAGGGTGTGAGCAGGTTTCATG  
CTTAGTGAAAAATGCAAGAGGGTAATATGTATGGTCGGAGCAGGAATCTCAACGGCTGT  
GGGATCCCAGATTTCCGTTACCCGGGTACAGGACTGTACGCCAATCTGCAGCAATAACAAC  
TTACCATAACCTGAAGCTATCTTTGAGATTGGCTACTTCAAGCAACACCCAGAGCCCTTC  
TTTGCCTTGGCCCGGAGCTGTACCCAGGACAGTTCAAGCCCACAATCTGTCACTACTTC

ATGCGCCTCCTCAAGGAGAAAGGGCTGCTGCTGCGCTGCTACACCCAGAACATCGACACC  
TTGGAACGGGTGGCAGGCCTGGGTAACGAAGATTTGGTGGAAGCTCATGGCACCTTTTTT  
ACCTCCCCTGCACAGGTTCTTCTGCAGGGAAATGTACAGCTTGGACTGGATGAAAGAA  
AAGATCTTCTCTGCCATTCCAAGTGTGAAAAATGCCAGAATGTAGTGAAGCCAGAT  
ATCGTGTTTTTTGGGGAGAATTTGCCCTCTCGTTTCTTCTCTCTGATGAAGTCAGATTT  
CGTGATGTAGACTTGCTTATCATCATGGGCACCTCCCTTCAGGTCCAGCCCTTTGCCTCA  
CTGGTCAGCAGGGTGCCTACAAACACACCACGGCTCCTCATCAATAAGGAAAAGACTGGA  
GAGAGTGATCCTTTTATGTCCTTGATGGGCTTTGGCTGCGGGATGGACTTCGACTCAGAA  
AAGGCATACCGGGATGTGGCACAACCTGGAGACTGTGACAAGGGCTGCCTAGCTTTAGCA  
GAGCTGCTGGGATGGAAGAAAGAGCTGGAAGAACTGGTAAAAGGGAGCACGCGCCATA  
GATGCTAAGTCAGGGCAAGCTATTGGAGATGGGGCCAGTGCACCCATCCTTCAGGAAAG  
GAGCAGCAGAAGCCCTCCCCAAAGAAGGAAGCCCTTCTCCAGCAAAGAAGAA

>Gecko\_SIRT2

ATGGACAACCGGGAGGACCCCGAGCCGCGCCAAGGTCGACGCCGGAAGGGCTCGGGG  
TCGTGAGCTCCGATTCTGACGACGAAGCCGGGGCATCAGGCCAGTCTGAAATGGATTT  
CTACGGAACCTCTTCTCCCGACGTTGGGTCTGGGCAGCGAGAAGCCCGAGAAGGTGCTG  
GATGAGCTGACGTTGGAGGGCGTGAGCAAGTTCATGCTGAGTGAGAAATGCAAGAAGGTA  
GTGTGCATGGTGGGAGCAGGGATCTCAACCGGTGCAGGGATCCAGATTTCCGTTCCCCG  
GGCACGGGGCTCTACGCCAATCTGCAGCAGTACAACCTACCATACCCTGAAGCCATCTTT  
GAGATCAGCTACTTCAAGCAACACCCAGAGCCGTTCTTTGCCCTGGCCGGGAGCTGTAC  
CCAGGGCAGTTAAGCCACCGTCTGCCACTACTTCATGCGCCTCCTGAAGGAGAAAGGG  
CTGCTGCTGCGTTGCTACACCCAGGTAGGTGGAATCCAGCCCTGCCCTGGGTCAAGGTA  
CACCTGACAGCGCACTACAAAGCCACAGCCAACAGAATCTCCTCAGGATGAGAAGAAACC  
ACCTCCTTCTGTTTCGTTTCAGAAAAGATCTTCTCGTCCCTCATCCCCAAGTGTGAAAAG  
TGTCAGAGTGTGGTGAAGCCAGATATTGCTTCTTCGGGGAGAACCTGCCTTCCCGTTTC  
TTCTCTGATGCAGTCGGATTTCCGCAACGTGGATTTGCTGATCATCATGGGCACCTCC  
CTTCAGGTCCAGCCCTTTGCTTCCCTCGTTGGCAGGGTGCCACAAACGCTCCCCGGCTC  
TTGATCAATAAAGAGAAGACTGGGGAGAGCGACCCTCTCATGTCCCTGATGGGCTTCGGA  
TGCGGGATGGACTTTGATTCCGAGAAGGCGTACAGGGACGTCGCCTGGCTCGGAGACTGT  
GACGAAGGCTGCCTGGCGTTGGCTGAGCTCCTAGGATGGAAGAAAGAGCTGGAGAAACTG  
GTGAGGGAGGAGCACGCGGCCATAGACGCCAAATCAGGCCAGGCTGTGAGAGACGGGGCA  
AGCGCCTGCAGCGCTCCGGCGAAGGAAGCGAAGCGGCCACCGTCCCCGAAGAAGAAATGC  
GAAGAGAAG

>Taiwan\_habu\_SIRT2

ATGGACAGCCGGGAAGGCGCTGCCGCCAGTCCCCAAGCGGACGCCGAAAAGGCCTCCAGG  
TCCTCGAGTTCAGATTCTGATGAGGAAGGGGGAGCTTCAGGCCAGACAGAAATGGAATTT  
TTGCGAAACCTCTTTCCCGACTCTGGGCTTTGGCAGTGAGAAGCCCGAGAAGGTGCTG  
GAGGAACTGACGCTGGAAGGCGTGACCAACTTCATACTGACTGAGAAATGCAAGAATATA  
GTCTGTATGGTTGGTGCAGGGATCTCGACCAGTGCGGGCATCCCCGATTTCCGCTCACCT  
GGCACGGGGCTGTATGCCAACCTGCAGCAGTACAATCTACCGTATCCCGAAGCCATCTTT  
GAGATTGGCTATTTCAAGCAAAACCCAGAACCTTTCACCTTGCTCGGGAGCTTTAC  
CCAGGGCAGTTCAAGCCCACTGTCTGTCACTACTTCATTCGTCTCTGAAGGATAAAGGG  
CTGCTACTGCGTGCTACACTCAGAACATCGACACCTTGAGAGGGTGGCCGGTCTGGAT  
CCCGAACACTTAGTGAAGCTCACGGCACCTTTTATACCTCCCACTGCATCAGCTCCACT

TGCAAGAAGCCCTACAGCCTGGAGTGGATGAAAGAAAAAATATTCGGATCTCTACCCCC  
CGATGTGAAAAATGTCAGAACATCGTGAAGCCAGACATCGTGTTTTTGGGGAGAATCTG  
CCCCCTCGTTTTCTTCACTCTCATGCAGTCGGATTTCCAGAATGCGGACATGCTTATTATC  
ATGGGCACCTCACTTCAGGTCCAGCCTTTTGCCTCTCTGGTCAGCAGGGTACCTGCAAAC  
ACACCACGGCTTCTGATCAATAAGGAGAAGACTGGAGAGAGTGATCCTTTTCATGTCCCTG  
ATGGGCTTAGGCTGCGGGATGGATTTTGATTTCGGAGAAGGCATACAGGGACGTGGCCTGG  
CTCGGAGACTGCGATGAGGGCTGCCTGGCTTTGGCAGAGCTATTGGGATGGAAGAAAGAA  
CTGGAGGAACTTGTGAAAAATGAACACGCTGTCAATTGAGGCCAAATCAGGGCAGACTGTG  
GGTGTGCGGGCAGGTGCTGATCGGCAACCAGCCAAGAAGCAAGAACAGAATCCATCTTTG  
GAGAAAGAAAAGCCACCTGCAAACAAGAAAGAA

>green\_sea\_turtle\_SIRT2

ATGCTTCTAACAGTAGCCACTAAAGGTAGAAAACAGTTCTGTGTTCCGACTGGCTTACTT  
CACCGACAGATCTTTTTATATTTTGTCTTCAGGACTCTGATTCTGACTCCGAAAACGGT  
GGTGCCTCTGGAGAGTCTGAAATGGATTTCTGCGAAACCTCCTGTCCCGACGCTGGGC  
CTGGGCAGCGAGAAGCCGAGAAGGTGCTGGATGAGCTGACGCTGGACGGAGTGAGCCGC  
TTCATGCAGAGCGAGAAGTGCAGGAACGTCGCTGCATAGTGGGCGCTGGGATCTCGACC  
TCTGCGGGGATCCCGACTTCCGGTCGCCCAGCACGGGGCTTACGCCAATCTGCAGAGC  
TAAACCTGCCGTACCCTGAAGCCATCTTCGAAATCAACTACTTCAAGCAACACCCGGAG  
CCGTTCTTTGCCCTTGCCAGGGAGCTGTATCCAGGCCAGTTTAAGCCCACCGTTTGCCAC  
TATTTCAATTCGGCTGCTGAAGGAGAAGGGTTTTGCTGCTGCGCTGTTACACGCAGAACATT  
GACACGTTGGAGCGGGTGGCCGGCTTGGACCAGGAAGATCTGGTGGAAGCCCACGGCACC  
TTCTTACCTCTCATTGTCTCGGCTCCTCCTGCAAGAAGAAATACACCCTGGACTGGATG  
AAAGAAAAGATTTTCTCGACTGTACCCCAAGTGCACAAATGTCAGAGTCTGGTGAAG  
CCAGATATTGTGTTCTTTGGGGAGAAGTTGCCCGCTTCTTCACTCATGCAGTCG  
GATTTCCAGAAGGTGGATCTGCTCATCATCATGGGCACGTCGCTGCAGGTGCAGCCCTTC  
GCCTCCCTCGTCAGCAGGGTGGCCACAAACACCCCAAGGCTGCTGATTAACAAGGAGAAG  
ACGGGGCAGAGCGATCCCTTTATGTCCTTATGGGCCTCAGCACCGGCATGGACTTCGAC  
TCAGAAAAGGCCTACAGGGATGTGGCATGGCTCGGGGAGTGCACCAAGGCTGCACAGCA  
CTGGCCGAGCTGCTGGGATGGAAGAACGAGCTGGAGGCGCTGGTGAAGAAGGAGCACTCT  
GCCATCGATGCCAAATCGGGCAGGCCGGCGAGGCCGGGGCAAGCCCCTCCCTTCCCCG  
GCTGGGGCCACGGCAAGCCCCTCCTCTCCCCAGCGAAGCCGGGGTTCATCGCCCGAGAAG  
GAAAGCGACGCCGAAACAAGGCGGAA

>African\_clawed\_frog\_SIRT2

ATGGAGAGGAATCCTGTGAGGAAAGCGATACCAGAGAGGCAGCTGCAGGAGACTTGTGAC  
AGGAGTGAGACAAGCGATGAAGGAAAGAGAAGCCCTTCATCGCATAAAACCGAATCGAGC  
GAACCAGCGGATCTTAAGGCACAAGCTGAAGATTCAGAGGACTCGGACTCCAGTGAAGAC  
AATAGTGGTGCATCTGAAATGGATTTCTGCGTAACCTCTTTTCCCGTACACTGGGCATT  
GGCACCCAGAGAAAAGTCTGGATGAGCTGAGCCTGGAGAGTGTGAGCAGGTTTCATGCTA  
AGTGAGAAATGCAAGAATGTGATCTGTATGGTAGGGCTGGTATCTCAACATCTGCTGGA  
ATTCCGACTTCCGTTACCCGGAAGTGGGCTGTACTCCAACCTGCAAAAATACAACCTTA  
CCATATCCAGAGGCCATCTTTCAAATTGGATACTTTAAGGAAAACCCAGAACCATTTTTT  
GCACTGGCTCGAGAACTATTTCCAGGGCAATTCAAGCCAACAATTTGTCATTATTTATG  
CGTCTGTTGAAGGAGAAGGGCCTGCTTCTCGTTGCTATTCTCAGAACATTGACACCCTG  
GAGAGGGTGGCAGGTCTGACTTCCGAGGACCTGGTGGAGGCTCATGGAACATTTTATAGT

TCCATTGTGTTGGCGCTTCTGTGGGGCTGAATATTCTCTTTCTTGATGAAAGAGAAG  
ATCTTTCTGATCTGATCCCAAAGTGTGAAAAATGTAACAATTTGGTTAAACCAGATATT  
GTTTTCTTTGGTGAAGTTTTGCCATCCAGATTCTTCTCTGCCGTTAAGTCTGACTTTCCC  
AAGGTTGATCTGCTCATAGTGATGGGAACCTCTCTGCAAGTTCAACCATTTGCATCTCTT  
GTCAGCAAAGTTTCTAGTAAGACCCCTCGACTTCTAATAACAAGGAGCTGACAGGTCAG  
GGCGACTCATTTTTAAGTGTCTAGGCTTGGGGGGAGGCATGGACTTTGATTCTGAGAAA  
GCATACAGGGACGTTGCATGGCTTGGAGACTGTGATGACGGTTGCCTTGCCTGGCCGAT  
TTCTTGGGGTGAAGGCTGAACTGGAAGAATTGGTAAAGAAGGAACATGCAGAAATAGAT  
GCAGCAGCAGAAGCAGCAAAGAAAAAAGAAAGCAAGCCAGACAATTCATCCAAAGAAGAG  
AGTTCTGCTGCAAATACTTCAGATGATAAAGCAAACAAC

>Tibetan\_frog\_SIRT2

ATGGCTGCAGAAGCAAAGAAAGTGAGGAACTCAAACCCAGGCGGAAGAATCAGAGGAA  
TCAGATCCAGCGAAGAAAACAGCAGTGCATCAGAAATGGATTTTCTGCGTGATCTTTTT  
TCCCGGACGCTGGGCATTGGTACTCCGAAAAAGTCCTTGATGAACTAACCTTGAAGGA  
GTAAGCAAATTCATGCTTAGCGACAAATGCAAGAATGTTGTGTTTATGGCTGGAGCAGGC  
ATCTCAACTTCTGCAGGAATCCCTGACTTTCGTTACCAGGCAGTGGACTATATTCAAAC  
CTTCAAAAGTACAACCTGCCATATCCAGAAGCCATATTTGAAATTGGATTCTTTAAGCAA  
AATCCAGAACCATTTTTGCTCTGGCTCGAGAACTGTATCCTGGTCAGTTCAAGCCAACT  
ATTTGCCATTATTTTATGCGTCTGATGAAAGAAAAAGGATTGTTACTGCGGTGCTACACC  
CAGAACATAGATACACTTGAGCGGGTAGCCGGCCTCTCGTCTGATGACTTGGTAGAGGCT  
CATGGAACCTTTACACCTCTCACTGTGTTGGAACATTTTGTGGAGAGGAGTATTCTCTT  
TCTTGATGAAAGAAAAGATTTTCTCTGATCTGATCCCTAAGTGTGAAAAGTGAACAAT  
TTGGTCAAGCCAGACATTGTATTTTTGGGGAAAGCCTCCATCCCGCTTTTTTTCTGCT  
TTGAAATCTGATTTCCCAAGATTGATCTCCTTATGTAATGGGAACATCACTACAAGTT  
CAGCCATTTGCTTCTTGTGGCAAAGTGCCTAGTAAGACACCGCTTTTTAATCAAC  
AAAGAAAAAACTGGTCAGGGAGACTCATTTTTGGACTGCTCGGTTTAGGAGGCGGAATG  
GACTTTGATTGACAAAAGCTTACAGGGATGTAGCCTGGCTTGGAGACTGTGATGATGGT  
TGTCTTGCCTTAGCTGAATTCTTAGGATGGAAGGCTGAACTGGAAGAAATGGTGAAGAAA  
GAACATGCAGCTATTGACGCAGCATCTAAGAAAACAGACAGCACCCAGGAAAGCTGGAA  
ACAAAAGAATCGCCTGAGAAAAATCAAGAGGAAAAACCATCAGAA

>southern\_platyfish\_SIRT2

ATGTCTGAACCATCAGAGTTCCCAAAAAAGAAGAAGGGGAGGAGGCCACCGCTGAA  
CCCAGGATCAATCAGACACCAGCAGTGAGGACGAAGCTGCAGGAGAAGCAGAGATGGAC  
GTCTTGC CGGCCCTTTTCGCAATGCGCTGGGGTTGGGCTTTCAGAGAAAGTTCTGGAT  
GAGTTGTCTCTGGAGAGCGTGGCGCGCTACATAAACAGCGGCAAATGTA AAAACATCATT  
TGCATGGTTGGAGCAGGAATATCAACATCTGCTGGGATCCCTGATTTCCGCTCTCCAGAA  
ACCGGTCTCTATGCAAACCTGCAAAAGTACAACCTGCCTTACCCGGAGGCCATCTCCAG  
ATCGATTACTTTAAGAATCATCCAGAACCATTCTTTGCTTTGGCCAGGGAGCTGTACCCA  
GGACAGTTTAAGCCCACAATCTGCCACTACTTCATAAAGATGTTGAAGGACAAGGGGGTT  
CTGAGACGATGCTACACGCAGAACATCGACACCCTGGAGCGAGTCGCAGGGATAAAAAGGA  
GACGATCTGATCGAAGCACATGGAACGTTCTACACCTCTCACTGTGTCAAATTGCTCTGC  
AAAAAGGAGTACGACCTGGACTGGATGAAAGAAAAAATCTTCTCTGACGAGATTCAAAG  
TGTGAAAAATGCAACAGTTTGGTCAAACCAGATATAGTATTTTTGGAGAGAGCCTGCCA  
ACCCGTTTCTCACTACCATGAAGATGGATTTTCTCTATGCGATCTCCTCATAGTCATG



GGCACATCTCTGCAGGTTCAACCGTTTGCAAGTTAATCGGCAGGGTTTCAAAAAGTTGC  
CCCAGGTTGCTCATTAACATGGAGAAAACAGGACAGGCAGATCCTATTTGGGGTTGCTT  
GGCTTTGGAGGAGGGATGGACTTTGACTCAGAAAATGCGTACAGAGACGTAGCTCAGATC  
AGTACGTGTGATGATGGCTGCTTGCTCTCGCTGACTTGCTGGGTTGGAAGGCGGAGCTG  
GAAGAGCTTGTGAAGAACGAGCATGCCAGGATCGACAGTGAGGACAAGCAGGAAAATCCT  
GGAGGAAGCGAAGGAGCTGCAGCCAAAGGAGCTGCAGCCAAAGGCGCTGCAGCCAAAGGC  
GCTGCAGCCAAAGGCGCTGCAGCCAAAGGCGCTGCAGCCAAAGGCGCTGCAGCCAAAGGC  
GCTCCAGCTTCAAGCTGAACCAAAATCCAAGCAGAGGAG

>guppy\_SIRT2

ATGTCTGAACCATCAGAGTCCCCTAAAAAGAAGAACAAGAGGAGCAGGCTACAGCTGAA  
CCCAGGACCAATCGGACGACAGCAGTGAAGACGAAGCTACAGGAGAAGCAGATATGGAC  
TTCCTGCGCGCCTCTTCTCCAGTGCCTGGGATTGGGCTTTCAGAGAAGGTTCTGGAT  
GAGTTGACTCTGGAGGGCGTGGCCCCGTACATAAACAGCGGCAAATGTAAAAACATAATT  
TGCATGGTTGGAGCAGGAATATCAACATCTGCTGGGATCCCGATTTTCGCTCTCCAGAA  
ACCGGTCTCTATGCAAACCTGCAGAAGTACAACCTGCCTTACCCGGAAGCCATCTCCAG  
ATCGATTACTTTAAGAAACATCCAGAACCATTCTTCGCTTTGGCCAGGGAGCTGTACCCA  
GGACAGTTTAAGCCCACAATCTGCCACTACTTCATAAAGATGCTGAAGGACAAAGGGTT  
CTGAGACGATGCTACACACAGAACATCGACACCCTGGAGCGAGTGCAGGGCTGGAAGGA  
GACGATCTGATCGAAGCACATGGAACGTTCTACACTTCACTGTGTCAAATTCCTCTGC  
AAAAAGGAGTACAACCTGGACTGGATGAAAGAAAAAATCTTTTCTGACGAGATTCCAAAG  
TGTGAAAAGTGCAGCAGTTTGGTCAAACCAGATATAGTTTTCTTTGGAGAGAACCTGCCA  
ACCCGTTTCTCACTTCCATGAAAATGGATTTTCTCGATGCGATCTCCTCATAGTAATG  
GGCACGTCTCTGCAGGTTCAACCGTTTGCAAGTTTAGTCAGCAGGGTTTCAAAAAGCTGC  
CCTAGGTTGCTCATTAACATGGAGAAAACAGGACAGGCAGATCCGATGTTGGGGTTGCTT  
GGCTTCGGAGGAGGGATGGACTTTGACTCAGACAAGGCGTACAGAGACGTAGCTCAGATC  
AGTACGTGTGATGACGGCTGCTTGCTCTCGCTGACTTGCTGGGTTGGAAGGTGGAGCTA  
GAAGAGCTTGTGAAGAAGGAGCACGCCAGGATCGACAGCGAGGACAATCAGGAGAGTCCC  
GGAGGAAGCAAAGGAGCTGCAGGCAAAGGCGCTTCGGCTTCAGCTTCAAGCTGAACCAAAA  
TCCAAGCAGAGGAG

>American\_alligator\_SIRT2

ATGGCCGAGCAGGAGGCTCCGGGGGCCGAGACGCGGGGCCAGGCCCGGGCTCCGACTCC  
CCGGACTCGGACTCCGACTCGGACAGCGGCGCCGGCGCCTCCGGAGAGTCCGAGATGGAG  
TTCCTGCGGACCCTGCTGTGCGGCACGCTGGGCTGGGCGGCGAGGGGCCGAGAAAGGTG  
CTGGAGGAGCTGACGCTGGAGGGCGTGAGCCGTTTCATGCTGAGCGACCAGTGCAAGAAC  
GTCGTGTGCATGGTGGGAGCCGGATCTCCACCTCTGCGGGATCCCGGATTTCCGGTCTG  
CCCGGCACGGGGCTCTACGCCAATTGGCGAGCTACAACCTGCCGTACCCGAAGCCATC  
TTCGACATCCGTTCTTCAAGAAAACCCAGAGCCGTTCTTCGCCCTGGCTAAGGAGCTG  
TACCCGGGGCAGTTAAGCCCACCGTGTGCCACTACTTCATGCGCCTGCTGAAGGAGAAG  
GGGCTGCTGCTGCGGTGCTACACCAGAACATCGACACGCTGGAGCGCGTGGCCGGGCTG  
GCGGCCGAGGACCTGGTGAAGCGCATGGCACCTTCTTACCTCCCACTGCCTTGGCACC  
GCCTGCCGAAGCAATAACCTGGACTGGATGAAAGAGAAGATCTTTTCTCTCTGGTC  
CCCAAATGTGACCAGTGCAATAACGTGGTGAAGCCTGACATCGTGTCTTCGGGGAGAGT  
CTCCCCCTCCGCTTCTTCACTCATGAGTCCGACTTCCAGAAGGTGGATCTGCTGCTC  
GTCATGGGCACCTCCCTGCAGGTGCAGCCTTTCGCTCCCTTGTGAGCAGGGTTCTGCTC

AAGACCCCCGGCTCCTCATCAACAAGGAGAAGACAGGGCAGAGCGACTTCTGCCTCTCG  
CTGCTGGGCTACGGCCCCGGCCTCGACTTTGACTCCGACAAGGCCTACAGGGATGTGGCC  
TGGCTCGGGGACTGTGACGCCGGCTGTGCGGCACTGGCCGAGCTCCTGGGCTGGAAGACG  
GAGCTGCAGGAGCTAGTGAAGAGAGAGCACGCCGCCATTGACACCAAGTCCAGCAGCCC  
CCCAGGGACTCCGCAGCCGGCTCCACTCCCCCCCCGAGCCGGCCAGACGCCGGGTCC  
TCGTCAGAGAAGAGCAGCGGTGCTGAGGGCAAGGAG

>Armadillo\_SIRT2

ATGGCTGAACCGGACCCCTCTGACCCCTGAGACCCAGGCAGGGAAGGTGCAGGAGGCT  
CAGGACTCAGGTTCTGACACTGAGGAAGGAGCAACTGGAGGAGAAGCAGAGATGGACTTC  
CTGCGGAATTTCTTCTCCAGACACTGGGCCTGGGCACCGAGAAGGAGCGACTGGAT  
GAACTCACTCTGGAAGGGGTGTCCCGCTACATGCAGAGCGAGCGCTGTCGAGGGTCATC  
TGTTTGGTGGGAGCTGGAGTCTCCACGTCCGCGGCATTCTGACTTCCGCTCCCCATCC  
ACGGGCCTCTACGCCAACCTGGAGAAGTACCATCTTCCCTACCCGGAGGCCATCTTTGAG  
ATTGGCTACTTCAAGAAACACCCAGAGCCCTTCTCACCTCGCAAGGAGCTTACCCT  
GGGCAGTTTAAGCCGACCATCTGTCACTACTTCATCCGCCTGTTGAAGGAGAAAGGGCTG  
CTGCTGCGTTGCTACACGCAGAACATAGACACCCTGGAGCGAGTGGCCGGCCTGGAGCCC  
GAGGACCTGGTGGAGGCCACGACCTTCTACACGTGCACTGCGTTAGCGCCGGCTGC  
CGGCGGGAGTACCCGCTGAGCTGGATGAAAGGTGAGGCTGCAGGTCAGCCAGCGGGCGCC  
CAGCTCGCCGTCCCCGCCTCAGCCCCAGGAGCAGGGTCCTTTACCCCTACCCCCCAC  
CCACCCCGCCCTCCGCACAGACTGACCCCTTCTGGGAATGATGATGGGCCTGGGAGGC  
GGCATGGACTTTGACTCCAAGAAGGCCTACAGGGACGTGGCCTGGGTGGGTGACTGCGAC  
CAGGGCTGCCTGGCCCTCGCCGACCTCCTGGGATGGAAGAAGGAGCTGGAGGACCTGGTC  
CAGAAGGAGCATGCCACCATCGACGCCAGTCGGGGCCGGGGGCTCCAACCCACCACC  
TCAGCTTCCCCAGGAAGTCTCACACCACCAAGGAGGAGGCCAGAACCACGGAGAAG  
GAGAAAGCCAG

>Chicken\_SIRT2

ATGTCCGAAGCGGACGCTCCCCCTCCCGGGGCTGATCCCGACGCTGAGGCTGAGGGCGGC  
TCCGAGGAAGACTCCGATATGGAGCTGTGCGGAACCTCTGGCACGGACGCTGGGGTTG  
GGCACGGAGCCCGGAGCGCTTCTGGATGAGCTGTGCTGGCGGAATCGCCCGGTTCC  
ATGCAAAGCGAGCGCTGCCGCCGTGTGGTGTGCATGGTGGGCGCCGGCATCTCCACGGCC  
GCTGGAATCCCCGACTTCCGCTACCCGGAACCGGGCTGTACGCCAACCTGGGCCGCTAC  
GAACTGCCCTACCCGAGGCCATCTTTGACATCAGCTATTTCAAGCAACACCCAGAGCCT  
TTCTTTGCGTTGGCTAAGGAGCTGCTCCAGGGCAGCTGAAGCCACCGTTTGCCACTAC  
TTCATGCGGCTGCTGAAGGAGAAGGGGCTGCTGCTGCGCTGCTACACACAGAACATCGAC  
ACGCTGGAGCGCTGGCGGGGCTGCAGCCCGAGGAGTTGGTGGAGGCTCACGGCACCTTC  
CAAACCGCGCACTGCCTGCGCTCCTCCTGCCGGCATCAGTATGACCTGAGCTGGGTGAAG  
GAGAAAATCTTCTTCCCTCGTCCCAAGTGCACAAATGCCAGAGCGTGGTGAAGCCA  
GACATCGATTTTTTGGTGAAGAATCTCCATCTCGCTTCTCAGTCTTCTGCAGTCGGAC  
TTCCAGAAGGTTGATCTTCTCATCATCATGGGTACTTCACTGCAGGTCCAGCCCTTCGCC  
TCCCTTGTAGCAGGGTCCCTGCCAGCACCCCCAGGCTCCTCATCAACAAGGAGAAAACA  
GGGCAGAGCGATGCTTTCATGTCCCTCATGGGCTTCGGCTGCGGGATGGACTTCGACTCG  
GACAAAGCCTACAGGGACGTGGCCTGGCTGGGGGACTGCGATGAGGGCTGCCTGGCACTG  
GCAGAGCTGCTGGGCTGGAAGAAGGAGCTGCAGGAGCTGGTGAAGGAGCACGCCGCC  
ATTGACGCCGTGGCAGCCCCGGAGGACACGAGCAGCGCTCAGGGGGAGACCCACGTC

CGGAGGGGCCACCGATGGCTCGGGGGCCGCGCTGAGAGCGGCGGAGCTTCCAGCGAA  
CAGAGGGGGGACGACAAAGAGCCG

>Chinese\_softshell\_turtle\_SIRT2

ATGGATTTCTGCGAAATCTCCTGTCCCGGACGCTGGGCCTGGGCAGTGAGAAACCGGAG  
AAGGTGCTGGATGAGCTGACACTAGATGGTGTGAGCCGCTTCATGCTGAGCGAGAAGTGC  
AGGAACATCGTCTGCATGGTGGGCGCTGGGATTTCAACCTCCGCGGGGATCCCAGACTTC  
CGTTCCGCCCGGACCCGGGCTCTACGCCAACCTGCAGAGCTACAACCTGCCATACCCGGAA  
GCCATCTTCGAAATCAGCTACTTCAAGCAACACCCGGAGCCGTTCTTTGCCCTCGCCAGG  
GAGCTGTACCCAGGGCAGTTCAAGCCCACCGTGTGCCACTACTTCATCCGGCTGCTGAAG  
GAGAAGGGCTTGCTGCTGCGCTGTTACACACAGAACATTGACACGCTGGAGCGGGTGGCC  
GGATTGGACCAGGACGATTTGGTGGAGGCTCACGGCACCTTCTTCACTTCACTGCCTC  
AGCCCCTCTGCAAGAAGCAGTACAGCCTGGACTGGATGAAAGAAAAGATTTTCTCGTCT  
CTGACGCCAAAGTGCACAAATGTCAGAGTCTGGTGAAGCCGGATATCGTCTTCTTCGGG  
GAGAGCTGCCCCCGCTTCTTCGACTCATGCAGTCGGATTTCCAGAAGGTGGATTTG  
CTTATCATCTGGGCACGTCGCTGCAGGTGCAGCCCTTCGCCTCCCTCGTCAGCAGGGTG  
CCCACAAACACCCCAAGGCTCCTGATTAACAAGGAGAAGACAGGGCAGAGCGATCCCTTC  
ATGTCGCTGATGGGTCTCGGCAGCGCATGGACTTCGACTCAGAAAAGGCCTACAGGGAC  
GTGGCCTGGCTGGGGGACTGTGCTGGAGGCTGCACAGCACTGGCAGAGCTGCTGGGATGG  
AAGAAGGAGCTGGAGGAGCTGGTGAGAAAGGAGCATGCTGCCATTGATGCTGGATCAGGG  
CAGGCCAGCGAGGCTGGGGCGAGCCCCTCCCTCCCCAGTGAAGCCGGCGGGGCCCTTG  
CCCAGAAGGAGGGCGGCGCTGGAAGCAAAGCAGAA

>Cod\_SIRT2

AACCAATCAGAAGACAGCAGCGAGGACGAAGCCTCCGGGGCGACAGAGATGGACTTTCTG  
CGTAACCTCTTCTCCAGCACCCCTGGGCCTTGGCTCGGTGGAGAAGGTTCTAGATGAGCTC  
AACCTGGAAGGGTTGGCGGTTACATACAGAGTGGAAAATGTAAAAATATAGTCTGCATG  
GTGGGAGCAGGGATATCCACCTCGGCTGGGATTCAGACTTTCGCTCCCCAGGGACTGGT  
CTCTATGCCAACCTGCAGAAATATAACCTGCCGTATCCAGAGGCCATCTTTCAGATTGAC  
TACTTCAAGAAACATCCTGAGCCATTCTTTGCCCTGGCTAGGGAActTACCCAGGACAG  
TTAAGCCTACAGTATGTCACTACTTCATGAAGATGCTGAAGGACAAGGGACTGCTCAGG  
CGCTGCTACTCACAGAACATCGACACCCTGGAACGGGTGGCCGGTCTGGAGGGAGATGAC  
CTGATCGAGGCTCATGGAACGTTCTTCACTCCCACTGCGTCAGCTTCTCCTGCCGCAA  
GAGTACAACCTGGAGTGGATGAAAGAGAAGATCTTCTCTGACGACATCCCCAAGTGTGAC  
AAGGTAGCAGTCTGGTCAAGCCAGATATCGTCTTCTTCGGAGAGAGTCTTCTGTCAGA  
TTTTTCACTTCAATGAAGATGGACTTCCCGCAGTGTGACCTCCTCATATTATGGGAACG  
TCCCTGCAGGTCCAGCCTTTCGCCGGTCTAGTGGGCAGAGTTTCCAAGAGCTGCCCCAGA  
CTGCTCATTAAACATGGAGAAGGCAGGACAGAGGCTGACCCGTTCTTTGGGGTGTACTTCG  
GGGAGGGATGGACTTTGACTCAGAAAAGGCTTACAGTCTTTAGGGATGTAGCTCACATC  
AGTACGTGTGACGAGGGCTGTCTGGCTCTTGCTGACCTGCTTGGATGGAAG

>Cow\_SIRT2

ATGGCCGATCCGGATCCCTCTGACCCTGAGGAGACCCAGGCAGGGAAGGTGCAGGAGGCT  
CAGGACTCAGATTCAGACACTGAGGCAGGAGCCACTGGCGGAGAAGCAGAGATGGACTTC  
CTGCGGAATTTCTTCTCCAGACTCTGGGCCTGGGCACCCAGAAGGAGCGACTCCTGGAC  
GAACTAACCTGGAAGGAGTGAGCCGCTACATGCAGAGCGAGCGCTGTGCGAGGGTCTC  
TGTTTGGTGGGAGCTGGAATCTCCAATTCCGCGGGTATCCCTGRCTTTCGGTCCCCAAC

ACGGGCTCTATGCCAACCTGGAGAAATACCGTCTTCCCTACCCGAGGCCATCTTTGAA  
ATCAGCTACTTCAAGAAACATCCAGAGCCCTTCTTTGCTCTCGCCAAGGAACTCTATCCT  
GGGCGTTCAAGCCCACCATCTGCCACTACTTCATCCGCTGCTGAAGGAAAAAGGACTG  
CTCCTGCGCTGCTACACACAGAACATAGACACCCTGGAGCGAGTGGCTGGGCTGGAGCCC  
GAAGACCTGGTGGAGGCCACGGCACCTTCTACACGTCCCACTGCATCAGCTCAGGCTGC  
CGGCAGGAGTACTACTAAGCTGGATGAAAGAGAAGATCTTCTCCGAGGTGACTCCCAAG  
TGTGAGAAATGTCAGAGCGTGGTGAAGCCTGATATCGTGTCTTTCGGCGAGAACCTCCCA  
GCGCGTTTCTTCTCCTGCATGCAGTCAGACTTCTAAAGGTGGACCTCCTTATCATCATG  
GGCACCTCCCTGCAGGTGCAGCCCTTCGCGTCCCTCATCGGCAAGGCGCCCCTGTCGACC  
CCGCGCCTGCTCATCAACAAGGAGAAGACTGGCCAGACTGACCCTTTCCTCGGGATGATG  
ATGGCCCTCGGAGGAGGCATGGACTTTGACTCCAAGAAGGCCTACAGGGACGTGGCCTGG  
CTGGGCGACTGTGACCAGGGCTGCCTGGCCCTCGCCGACCTCCTTGATGGAAGAAGGAG  
CTGGAGGACCTTGTTCCGAAGGAGCATGCCAGCATAGATGCCAGTCGGGGTCCGGGGGCC  
TCCAACCCCGCTACCTCAGCTTCCCCAGGAATTCTCCACCACCTCCACCAAGGAGGAG  
CCCAGGACCACTGAGGGAGAGAAACCCAG

>Dog\_SIRT2

ATGGACTTCTGCGGAACTTATTCTCCAGACACTGGGCCTGGGCACCCAGAAGGAGCGT  
CTGCTGGACGACCTACCCTGGAGGGGGTGACCCGCTACATGCAGAGCGAACGCTGTGCG  
AGGGTCATCTGTTTGGTGGGAGCTGGGATCTCCAGTCTGCCGGCATCCCTGACTTCCGC  
TCCCCATCCACGGGCCTTACGCCAACCTAGAGAAGTACCACCTTCCCTACCCAGAGGCC  
ATCTTTGAGATTGGCTACTTCAAGAAACACCCAGAACCTTTCTTTGCTCTCGCCAAGGAA  
CTCTATCCTGGCCAGTTCAAGCCAACTGTGTGTCATACTTTCATCCGGCTGCTGAAGGAG  
AAGGGGCTGCTGCTGCGATGCTACACACAGAACATAGACACCCTGGAGCGGGTGGCCGGG  
CTGGAACCTGAGGACCTGGTGGAGGCCACGGCACCTTCTACACCTCGCACTGTATCAGC  
CCCCTGTGCCGACGGGAGTACCCGCTCAGCTGGATGAAAGAGAAGATCTTCTCCGAGGTG  
ACTCCAAGTGTGAGAAATGTCACAGCGTGGTGAAGCCTGACATCGTGTCTTTCGGCGAG  
AACCTCCAGCAAGGTTCTTCTCCTGCATGCAGTCAGACTTCTGAAGGTGGACCTCCTC  
ATCATCATGGGTACCTCCCTGCAAGTGCAGCCCTTTGCTTCCCTCATCAGCAAGGCGCCC  
CTCTTACCCCGCGCTGCTCATCAACAAGGAGAAGACTGGGCAGACTGACCCTTTCCTG  
GGGATGATGATGGGCCTTGGAGGAGGCATGGACTTCGACTCCAAGAAGGCCTACAGGGAC  
GTGGCCTGGCTGGGTGACTGTGACCAGGGCTGCCTGGCCCTTGCCGACCTCCTCGGATGG  
AAGAAAGAACTGGAGGACCTTGTCCGGAAGGAGCATGCCACATAGACGCCAGGCAGGG  
TCAGGGGGCCCCAACCCAGCACTTCAACTTCACTTCTCCAGCAAGTCTCCACCTCCT  
GCCAAGGAGGAGGCCAGGACCAAGGAGGGAGAGAAACCCCAA

>Dolphin\_SIRT2

ATGGCTGAGCCGGATCCCTCTGACCCTGTGGAGACCCAGGCAGGGAAGGTGCAGGAGGCT  
CAGGACTCAGATTCAGACACTGAGGGAGGAGCGGCTGGCGGAGAAGGAGAGATGGACTTC  
CTGCGGAATTTCTTCTCCAGACACTGGGCCTGGGCACCCAGAAGGAGCGTCTGCTGGAC  
GAATTAACCCTGGAAGGGGTGACCCGCTACATGCAGAGTGAGCGCTGTGCGAGGGTTATC  
TGTTTGGTGGGAGCTGGAATCTCCACTTCGGCGGGCATCCCTGACTTCCGCTCCCCAAAC  
ACGGGCTCTACGCCAACCTGGAGAAATACCATCTTCCCTACCCGAGGCCATCTTTGAG  
ATTGGCTACTTCAAGAAACACCCAGAGCCCTTCTTTGCCCTCGCCAAGGAACTCTATCCT  
GGGCGTTCAAGCCCACCGTCTGCCACTACTTCATCCGCTGCTGAAGGAGAAAGGGCTG  
CTCCTGCGCTGCTACACGCAGAACATAGACACCCTGGAGCGAGTGGCGGGGCTGGAGGCC

GAGGACCTGGTGGAGGCCACGGCACCTTCTACACGTCTCACTGCATCAGCCCCGTCTGC  
CGGCAGGAGTACGCGCTAAGCTGGATGAAAGAGAAGATCTTCTCCGAGGTGACTCCCAAG  
TGTGAGAAATGTCGGAGTGTGGTGAAGCCTGATATCGTGTCTTTGGCGAGAACCTCCC  
GCGGTTTTCTCTCCTGCCTGCAGTCAGACTTCTGAAGGTGGACCTCTCATCATCATG  
GGCACCTCCCTGCAGGTGCAGCCCTTCGCATCCCTTATCAGCAAGGCGCCCTCTCCACC  
CCGCGCTGCTCATCAACAAGGAGAAGACTGGCCAGATGGACCCTTCTCGGGATGATG  
ATGGGCTCGGAGGAGGCATGGACTTCGACTCCAAGAAGGCCTACAGGGATGTGGCCTGG  
CTGGGTGACTGCGACCAGGGCTGCCTGGCCCTTGCCGACCTCCTCGGATGGAAGAAGGAA  
CTGGAGGACCTTGTCCGAAGGAGCATGCCAGCATAGATGCCAGTCAGGGTCAGGGGCT  
CCCAACCCACCCTTCACTTCTCCAGGAAGTCTCCACCTCCTGCCAAGGAGGAGGCC  
AGGACCACGGAGGGAGAGAAACCCAG

>Elephant\_SIRT2

ATGGCCGAGCCGACCCCTCTGACCCTCTGGAGACCCAGGCAGGGAAGGTGCAGGAGGCT  
CAGGACTCAGATTCGGATTCAGACACTGAGGAAGGAGCCACTGGCGGAGAAGCTGAGATG  
GACTTCTGCGGAATTTCTTCTCCAAACGCTGGGCCTGGGCTCTGAGAGGGAGCGTCTG  
CTGGATGAGCTAACCTGGAAGGGGTGACCCGCTACATGCAGAGCGAGCGCTGTCCGAGG  
GTCATCTGCTTGGTGGGAGCTGGAATCTCCACGTCCGCGGGCATCCCTGACTTCCGCTCA  
CCGACCACCGGCCTCTATGCCAACCTGGAGAAGTACCGTCTCCCTACCCAGAGGCCATT  
TTCGAGATTGGCTACTTCAAGAAACATCCAGAGCCCTTCTTTGCCCTCGCCAAGGAGCTC  
TATCCTGGGCAGTTAAGCCACCACCTGCCACTACTTCATCCGCCTGCTGAAGGAGAAG  
GGGCTCCTCCTGCGCTGCTACACGCAGAACATAGACACCTTGGAGCGTGTGGCGGGGCTC  
GAGCCTGAGGACCTGGTGGAGGCCATGGCACCTTCTACACGTCACTGCCTCAGCCCC  
CTCTGCCGGCGGGAGTACACTAAGCTGGATGAAAGAGAAGATCTTCTCCGAGGTGACT  
CCCAAGTGTGAGAAATGTCAGAGCCTGGTGAAGCCTGACATCGTGTCTTCCGCGAGAGC  
CTCCCGGCGGTTTTCTTCTCCTGCATGCAGTCAGACTTCTGAAGGTGGACCTCTCATC  
ATCATGGGCACCTCCCTGCAGGTGCAGCCCTTCGCATCCCTCATCAGCAAGGCACCCCTC  
TCCACCCCGCGCTCCTCATCAACAAGGAGAAGACGGGCCAGACCGACCCCTTCTGGGC  
ATGATGATGGGTCTTGGAGGAGGCATGGACTTCGACTCCAAGAAAGCCTACAGGGATGTG  
GCCTGGCTGGGTGATTGTGACCAGGGCTGCCTGGCCCTTGCTGACCTCCTCGGATGGAAG  
AAGGAACTGGAGGATCTTGTCCAGAAGGAGCATGCAGCCATAGATGCCAGTCGGGTGCA  
GGGACCCCAACCCCGGCATTTCTACTTCCCCAGGAAGTCTCCACCACCCGCCAAGGAG  
GAGGCCAAAACCACGGAGGGGGAGAAACCCAG

>tropical\_clawed\_frog\_SIRT2

ATGTACATTGAATCCATTTGTACCAATGGGCAGACGGCAAAGGCGGATTCAATGTTCTCA  
CGTGATCCACTGTTGTTGTTAAACCCGGAAGTGGCCGAAGTTCAATGGCTGCAGAAGCT  
AGCAAACCAGCGGATCTCACGGCACAAGCTGAAGACTCAGAGGACTCAGACTCCAGTGAA  
GACATTAGTGGTGCATCTGAAATGGACTACCTACGGAATCTTCTCCCGCACACTGGGC  
ATAGGAACCCAGAGAAAGTTCTGGATGAGTTGAGCATAGAAGGCATAAGCAGGTTTCATG  
CTAAGTGAGAAATGCAAGAATGTGGTTTGTATGGTAGGGGCTGGCATCTCGACATCTGCT  
GGCATTCTGACTTCCGTTCCCCAGGCAGTGGGCTGTACTCCAACCTGCAAAAATACAAC  
TTACCATATCCAGAGGCCATTTTTCAAATTGGATACTTTAAGGAAAATCCAGAACCTTTT  
TTTGCTTTGGCTCGAGAACTATTTCCAGGGCAATTTAAGCCAACAATTTGTCATTACTTT  
ATTGCGCTACTGAAAGAAAAGGCCTGCTTCTCGTTGCTATTCTCAGAACATTGACACC  
CTGGAGAGAGTGGCCGCTGACTTCTGATGACCTGGTGGAGGCTCATGGAACCTTTTCAT

AGTTCCATTGTGTTGACACATTCTGTAGGGCTGAGTATTCTCTCTCCTGGATGAAGGAA  
AAGATCTTTTCTGATCTGATCCCAAAGTGTGAAAAATGTAACAATTTGGTTAAACCAGAT  
ATTGTTTTCTTTGGTGAAAGTTTGCCATCCAGATTCTTCTCTGCCATTAAGTCTGACTTT  
CCCAAGGTTGATCTGCTCATAGTGATGGGAACCTCTCTGCAAGTTCAGCCATTTGCATCT  
CTTGTCAGCAAAGTGTCTAGTAAGACCCCTAGACTTCTAATAAACAAGGAGCTGGCAGGA  
CAGGGTGACCCATTTTTCAGTGTTTTTGGCTTTGGAGGAGGCATGGACTTTGATTCTGAG  
AAAGCATAACAGGGACGTTGCATGGCTTGGAGACTGTGATGATGGCTGCCTTGCCTAGCT  
GATTTCTGGGGTGAAGGCTGAATTGGAAGAATTAGTAAAGAAGGAACATGCAGCAATA  
GATGCAGCAGCAGAAGCAGCAAAGAAAAAGAAAGCAAGCCAGGGGGCTCATCCAGTGAA  
GAAAGTTCTGCAGCAAATGCTTCAGATGAGAAAAGCAAATAAC

>Fruitfly\_SIRT2

ATGGATAAGGTTTCGACGCTTCTTTGCAAACACTCTACATCTCGGCGGCTCCTCGGACGCA  
AAGGAGGAAGTTAAAGTAGAGAAGGTTATTCCAGATTTGAGTTTTGACGGCTTTGCCGAA  
CATTGGCGTGTGCATGTTTTCCGCAAGATTGTGACCATGGTGGGAGCCGGCATATCTACA  
TCTGCTGGCATTCCGGATTTTCAGATCCCCAGGTTCCGGGTATACAGCAATCTGAAGAAG  
TACGAGCTGCCACATCCTACGGCCATATTTCGATCTGGACTACTTCGAAAAGAATCCAGCG  
CCGTTTTTTCGACTGGCCAAGGAACTTTACCCTGGATCCTTCATTCCCACGCCGGCCAC  
TACTTTATCCGTTTGCTTAACGACAAGGGACTACTGCAGCGCCACTACCCAGAACATA  
GACACGCTAGACCGGCTTACTGGCCTGCCGAGGACAAGATCATTGAGGCCCATGGCAGC  
TTCCACACCAACCACTGCATTAAGTGCCGCAAGGAGTACGACATGGACTGGATGAAGGCG  
GAGATCTTCGCCGATCGTCTGCCAAATGCCAAAAGTGCCAAGGCGTTGTTAAACCAGAC  
ATTGTTTTCTTTGGCGAAAATTGCCAAAGAGATTTACTCCAGTCTGAAGAGGATTTTC  
CAGGATTGCGATCTGCTGATCATATGGGCACATCGTTGGAAGTGCAACCGTTTGCTTCA  
CTGGTGTGGAGACCAGGACCAGTTCGATTCGCCTTTGATCAATCGCGATGCAGTGGGT  
CAGGCCAGCTGTGTGCTTTTATGGATCCCAACACGCGATCGTACTCTTCGATAAGCCC  
AATAAAGTACTAGGGATGTGGCCTTTCTGGGCGACTGTGATGCTGGCGTAATGGCTCTGGCC  
AAAGCCTTGGGCTGGGACCAAGAGCTGCAGCAGCTAATTACAAGTAAAGGAAGAAACTG  
AGCGGCAGCCAGAATAGTGAGGAGCTGCAACAAGGCAAAGAGAAACCGCAATCGGACCCG  
GATAAGATGACTTCGGGCGATAGGGACAAGAAGGATGCTTCGCTT

>Mouse\_SIRT2

ATGGACTTCTGAGGAATTTATTACCCAGACCCTGGGCCTGGGTTCCCAAAGGAGCGT  
CTTCTAGACGAGCTGACCCTCGAAGGAGTGACACGCTACATGCAGAGCGAGCGCTGCCGC  
AAGGTCATCTGTTTGGTGGGAGCCGGAATCTCCACGTCCGCGGGTATCCCTGACTTCCGC  
TCCCCGTCCACTGGCCTCTATGCAAACCTGGAGAAGTACCACCTTCTTACCAGAGGCC  
ATCTTTGAGATCAGCTACTTCAAGAAACATCCGGAACCTTCTTTGCCCTTGCCAAGGAG  
CTCTATCCCGGGCAGTTCAAGCCAACCATCTGCCACTACTTCATCCGCCTGCTGAAGGAG  
AAGGGGCTGCTGCTGCGCTGTACACGCAGAACATAGACACGCTGGAACGAGTGGCGGGG  
CTGGAGCCCCAGGACCTGGTGGAGGCCACGGCACCTTCTACACATCACTGTGTCAAC  
ACCTCCTGCAGAAAAGAATACACGATGGGCTGGATGAAAGAGAAGATCTTCTCAGAAGCA  
ACTCCAGGTGTGAGCAGTGTGAGAGTGTGGTAAAGCCTGATATCGTGTTTTTCGGTGAG  
AACCTTCCATCGCGCTTCTTCTCCTGCATGCAGTCACTTCTCCAAGGTGGACCTCTC  
ATCATCATGGGCACCTCCCTGCAGGTGCAGCCCTTCGCCTCCCTCATCAGCAAGGCACCA  
CTAGCCACCCACGGCTGCTCATTAAAGGAAAAGACAGGCCAGACGGACCCCTTCTG  
GGCATGATGATGGGCCTGGGAGGTGGCATGGATTTGACTCCAAGAAGGCTTACAGGGAC

GTGGCCTGGCTGGGTGACTGTGATCAAGGCTGCCTGGCTCTCGCTGACCTCCTCGGATGG  
AAGAAGGAACTGGAAGACCTTGTCCGGAGGGAGCATGCCAACATAGATGCCAGTCAGGG  
TCACAGGCCCCCAACCCAGCACTACCATCTCCCCTGGAAAGTCCCCACCGCCTGCCAAG  
GAGGCGGCCAGGACCAAAGAGAAAGAGGAACAGCAG

>Zebrafish\_SIRT2

ATGTCTGAAGAGGTTTCTAAAAGGGTAGAAGAGGAGGCTGACACACCAGGTCTCGAGGGT  
CAGTCAGATGATAGCAGTGACGAGGGTGACGCTTCAGGAGATACTGAGATGGATTTTTTG  
CGCAGTCTTTTTCTCGGAACACTTGGCCTTAGTCTGGAGATAAAGTCTTGATGAGTTA  
ACCCTGGACTCAGTTGCTCGCTACATACTGAGTGGCAAATGTAAGAACATTATCTGTATG  
GTCGGAGCTGGGATATCTACATCTGCAGGAATCCCAGATTTCCGCTCTCCTGGCACGGGC  
TTATATGCAAATCTGCAGAAGTACAACCTGCCTTACCCAGAGGCCATCTTTCAGATAGAC  
TATTTCAAGAAACATCCGGAGCCCTTCTTTGCTCTGGCCAGAGAACTGTACCCAGGACAG  
TTAAGCCCACAGTGTAACCACTATTCATAAAGATGCTGAAAGACAAAGGCTTACTGAGG  
CGCTGTTATTCTCAAATATTGATACTCTAGAAAAGGGTTGCAGGACTGGAAGGAGAGGAC  
CTGATTGAAGCTCATGGTACATTTACACATCTCACTGTGTGAGCTTCTCTGTCGTA  
GAGTACAGCATGGACTGGATGAAAAATCAAATTTTCTCTGAAGAAATTCCTAAGTGCAT  
TCCTGTGGAAGCCTCGTAAAACCCGATATTGTGTTTTTTGGGGAAAGTCTGCCTTCCCGA  
TTTTCACTTCAATGAAAGCGGACTTTCTCAATGTGACCTTCTGATCATAATGGGGACA  
TCTTTGCAGGTTAGCCATTTGCATCTCTAGTGAGCAGAGTCTCAAACCGCTGTCCACGA  
TTGCTGATCAATATGGAGAAAACCTGGACAGTCTGAATTTGGCATGGGGCTATTCAGTTTT  
GGAGGCGGAATGGATTTTGATTAGATAAGGCCTACAGAGATGTGGCTCATCTGAGCACC  
TGTGACGATGGCTGCATGACTCTCGCTGAACTGCTGGGCTGGAAAAAAGAGCTGGAGGAG  
ATGGTGAAGCGTGAACATGCTTTGATTGACAGCAAAGATGCCAAAAAGACTGACAAAGAA  
GCCAGTCAGAGCTCCAAAAGTGTGTGGCGGAGGCAGAGAAGACTGACAAAACAGAA

>Rabbit\_SIRT2

ATGGCTGCCACCGCCAGGCCGTCTGGGACTCGTAGTTCCGCCTTCGGGCGCGCACGGGGC  
GTTTGGGGAAAGCCCTGTATGCGGCCGAGATGGGTGCTGGGAGTCGTAGTTCTATGCC  
GACGCCGTCCCCTTCTGTTTCCGGTGCCGTACGGGACAGAGCAGTCGGTGACAGCCCCG  
AGGGCCCCCGCCCCGAGCCATGGCCGAGCCGATCGATTCCGATTCTGACTCCGAGGGA  
GGAGCGGCTGGCGGAGAAGCAGAGATGGACTTCTGCGGAATCTGTTCTCCAGACCCTG  
GGCCTGGGTACCCAGAAGGAGCGGCTGCTGGACGAGCTGACCCTGGAAGGCGTGAGCCG  
TTCATTAGAGCGACCGCTGTGCGAGGATCATCTGCCTGGTGGGCGCTGGCATCTCCACG  
TCCGCGGGCATCCCTGACTTCCGGTCTCCGTCCACCGCCTCTATGCCAACCTGGAGAAG  
TACCGGCTGCCCTACCCAGAGGCCATCTTTGAGATCGGCTACTTCAAGAAACATCCGGAA  
CCCTTCTCGCTCTTGCCAAGGAACTCTATCCCGGCAGTTCAAGCCCACCACCTGCCAC  
TACTTCATCCGGCTGCTGAAGGACAAGGGGCTGCTGCTGCGCTGCTACACGCAGAACATA  
GACACCCTGGAGCGCGTGGCGGGGCTGGAGCCAGAGGACCTGGTGGAGGCCACGGTACC  
TTCTACACATCACTGTATCAGCTCCCTGTGCCGGCGTGAGTACTCGCTGGACTGGATG  
AAAGAGAAGATCTTCTCGGAGGTGACTCCCAAGTGTGAGAAGTGCCAGAGCGTGGTGAAG  
CCTGACATCGTATTTTTCGGAGAGAACCTGCCAGCGCGCTTCTTCTCCTGCATGCAGTCA  
GACTTCTGAAGGTGGACCTGCTCATCGTCATGGGCACCTCCCTGCAGGTGCAGCCCTTC  
GCGTCCCTCATCGGCAAGGCACCCCTGTCCACCCCGCGCTGCTCATCAACAAGGAGAAAG  
ACCGGCCAGACGGACCCCTTCTGGGGATGATGATGGGCCTGGGAGGAGGCATGGACTTT  
GACTCCAAGAAGGCCTACAGGGACGTGGCCTGGCTGGGGGATTGTGACCAGGGCTGCCTG

GCCCTCGCCGACCTCCTCGGATGGAAAAAGGAGCTGGAGGACCTTGCCAGAAGGAGCAC  
GCCCCATAGACGCCAGCTGGGATCGGGGACCCCAACCCACCACTGCAGCCTCCCC  
AAGACGGCCCCACTGCCTGCCAGGAAGAGGCCAGGACCCGAGAGGGAGAGAAACCCAG

>Chinese\_alligator\_SIRT2

GGGGCCGCAGACGCGGGGCCAGGCCGGCTCCGACTCCCCGGACTCCGACCTGGACTCG  
GACAGCGGCGCCGGCCTCCGGAGAGTCCGAGATGGAGTTCCTGCGGACCCTGCTGTGC  
CGGACGCTGGGCTGGGCGGCGAGGGGCCGGAGAAGGTGCTGGAGGAGCTGACGCTGGAG  
GGCGGGAGCCGGTTCATGCTGAGCGACCAGTGAAGAACGTCGTGTGCATGGTGGGAGCC  
GGGATCTCCACCTCTGCAGGGATCCCGATTTCGGTTCGCCGGGCACGGGGCTCTACGCC  
AACCTGACGAGCTATAACCTGCCGTACCCAGAAGCCATCTTCGACATCCGCTTCTTCAAG  
AAAACCCCGAGCCGTTCTTCGCCTTGCTAAGGAGCTGTACCCGGGGCAGTTCAAGNCC  
GCCGTGGGCCACTACTTCAGGCGCCTGCTGAAGGAGAAGGGGCTGCTGCTGCGGTGCTAC  
ACCCAGAACATCGACACGCTGGAGCGCGTGGCCGGGCTGGCGGCCGAGGACCTGGTGAA  
GCGCATGGCACCTTCTCACCTCCACTGCCTTGCCACCGCCTGCCGCAAGCAATACGAC  
CTGACTGGATGAAAGAGAAGATCTTTCTCCCTGGTCCCAGATGTGACCAGTGAAT  
AACGTGGTGAAGCCTGACATCGTGTCTTCGGGGAGAGTCTCCCTCCCGCTTCTCAGT  
CTCATGCAGTCGCTTTGTCTGTCTTCTCCCCCGCAGGGATGTGGCCTGGCTCGGGGAC  
TGTGACACCGGCTGTGCGGCACTGGCCGAGCTCCTGGGCTGGAAGACGGAGCTGCAGGAG  
CTAGTGAAGAGAGAGCACGCCGCCATTGACGCCAAGTCCCAGCAGCCCCCGGGGACTCC  
GCAGCCGGCTCCGCTCCCCCCCCGCAGCCGGCCAGACGCCGAAGTCTCGTCAGAGAAG  
AGCAGCGGTGCCGAGGGCAAGAAGGAG

>Yeast\_SIRT2

ATGACCATCCACATATGAAATACGCCGTATCAAAGACTAGCGAAAATAAGGTTTCAAAT  
ACAGTAAGCCCCACACAAGATAAAGACGCGATCAGAAAACAACCCGATGACATTATAAAT  
AATGATGAACCTTACATAAGAAGATAAAAGTAGCACAGCCGGATTCCCTTGAGGGAAACC  
AACACAACAGATCCACTTGGGCACACTAAAGCTGCGCTCGGAGAAGTGGCATCGATGGAG  
CTCAAACCAACTAATGACATGGATCCCTTGGCAGTGTGACGAGCTTCAAGTGTCAATG  
TCCAATGACGTTTTGAAACCAGAGACGCCAAGGGGCCAATCATAATCAGTAAAAACCA  
TCAAATGGTATTTCTATGGTCCCTCCTTCACTAAACGAGAGTCTCTCAATGCTCGAATG  
TTTCTGAAATACTATGGTGCACACAAATTTTAGACACTTACCTCCCCGAGGATTTGAAC  
TCGTTATACATTTACTATCTTATCAAGTTGCTAGGCTTTGAAGTTAAAGATCAAGCGCTT  
ATCGGCACCATCAACAGTATTGTCCATATCAACTCGCAAGAGCGTGTTCAGATTTGGGA  
AGTGAATATCTGTCAAAATGTTGAAGACCCATTGGCAAAAAAGCAAACAGTTCGTCTA  
ATCAAAGATTTGCAAAGAGCAATTAACAAAGTTCTATGTACAAGATTAAGATTATCCAAT  
TTTTTCACTATTGATCATTTTATTCAAAAATTACATACCGCTAGAAAAATTTTGGTCCTG  
ACTGGTGCAGGTGTTTCAACTTCATTAGGGATCCCGGACTTCAGATCTTCTGAGGGGTTT  
TATTCAAAGATCAAACATTTGGGGCTCGATGATCCCCAAGACGTTTTCAATTACAATATA  
TTTATGCACGACCCCTCTGTTTTCTATAATATTGCCAATATGGTTTTACCTCCAGAAAAA  
ATTTATTCTCCATTGCATAGTTTCATTAAGATGCTACAAATGAAAGGGAAATTATTGAGA  
AATTATACTCAAACATTGATAATTTGGAATCTTATGCGGGAATAAGCACAGATAAACTG  
GTGCAGTGCCATGGCTCTTTGCTACTGCCACCTGCGTTACCTGCCATTGGAACCTACCC  
GGTGAGAGGATATTTAATAAAAATTAGAAACCTCGAAGTCCACTATGCCCCGACTGTTAC  
AAAAAAGAAGAGAATATTTCCAGAGGGATATAATAATAAAGTAGGTGTTGCTGCATCA



CAGGGTTCAATGTCGGAAAGGCCTCCATATATCCTTAACTCATATGGCGTTCTCAAACCA  
GATATCACATTCTTTGGCGAAGCACTGCCAAATAAATTTATAAGAGCATTTCGCGAAGAT  
ATCTTAGAATGTGATTTGTTGATTTGCATTGGGACAAGTTTAAAAGTAGCGCCAGTGTCT  
GAAATCGTAAACATGGTTCCTTCCCACGTTCCCAAGTCTGATTAATCGTGATCCCGTC  
AAGCACGCAGAATTTGATTTATCTCTTTTGGGGTACTGTGATGACATTGCAGCTATGGTA  
GCCAAAAATGTGGCTGGACGATTCCGCATAAGAAATGGAACGATTTGAAGAACAAGAAC  
TTAAATGCCAAGAGAAGGATAAGGGCGTGTATGTCGTTACATCAGATGAACATCCCAAA  
ACCCTC

>Worm\_SIRT2

ATGTCACGTGATAGTGCAACGATTTCAGAAGTTGCGGTCACACACGGGGAAGTGCAAGAA  
ATAACGGAGAAAATCCAGAAATCGGTTCTATGCACATTACACAAGAAACAGATATTTCC  
GATGCACCCGAAACAAACACAGATTCGAGTAGACAAAGAACAGAAAGTACAACCAGTGTCT  
AGTTCAGAGTCTTGGCAAATAATGACGAAATGATGTGAATCTTCGTCGTGCTCAAAGA  
CTTCTTGATGATGGTGCCACTCCATTACAAATTATTCAACAAATTTTCTGATTTTAAAT  
GCATCACGAATTGCAACAATGTCAGAGAACGCGCATTTCCGCATATTAAGCGATCTTCTA  
GAACGTGCTCCTGTAAGGCAGAACTCACAACTCAACTACTAGCAGATGCAGTCGAA  
CTATTTAAACAAAGAAACATATTCTGTGTTGACTGGCGCTGGAGTGTGAGTATCCTGT  
GGAATTCAGATTTTCGAAGTAAAGATGGTATTTATGCACGACTTCGGAGCGAGTTTCCC  
GATCTTCTGATCCGACAGCAATGTTGATATTCGTTACTTCCGAGAAAATCCTGCTCCG  
TTCTACAATTTTGCAGAGAAATCTTCCCAGGACAGTTCGTACCATCTGTATCACATCGA  
TTTATCAAAGAGCTTGAACTTCTGGTCTTCTTTCGAAATTCACTCAAATATCGAT  
ACATTAGAGCATCAGACTGGAATTAAGAGATTGTGGAATGTCATGGATCCTTTTCGAAA  
TGTACATGTACACGTTGTGGACAAAATATGATGGGAATGAGATTCGTGAGGAAGTTCTT  
GCTATGCGTGTGCCCATTGCAAACGTTGCGAAGGAGTGTCAAACCGAATATTGTATTC  
TTTGGAGAGGATCTCGGAAGAGAATTTATCAACATGTTACAGAAGACAAGCATAAAGTA  
GATCTCATTGTAGTTATTGGATCTTCTCTCAAAGTTCCGACCAGTTGCATTAATTCACAT  
TGTGTTGATAAGAATGTTCCACAAATTCTAATCAACAGAGAATCCCTCCACATTATAAT  
GCAGATATTGAATTGCTCGGAAATTGTGATGACATCATCAGAGATATCTGTTTCAGTCTT  
GGAGGCTCCTTCACTGAACTGATTACATCTTATGATTCGATTATGGAACAACAAGGAAAA  
ACGAAATCACAAAAGCCTTCACAAAACAAACGACAGTTGATTTACAGGAAGACTTTTTG  
AATATTTGATGAAAGAGAAAAGAAATGATGATTCGAGTGATGAGCCAACATTGAAGAAA  
CCAAGAATGTCGGTGGCTGACGATTCGATGGATTCCGAGAAGAATAATTTCCAAGAAATA  
CAAAAACATAAGTCAGAAGATGACGATGATACACGGAATTCGGACGATATTCTCAAGAAA  
ATAAAGCATCCAAGGCTGCTGAGCATTACTGAGATGCTCCATGACAATAAGTGTGTCGCG  
ATTTCTGCTCATCAAACCGTCTTTCTGGAGCCGAATGCTCATTGATCTAGAAACATTG  
AAACTGGTTCGTGATGTTATCACGAGACACATTGCGAAAGTTCGTGTGGTTCTGCTTGC  
TCATCAAATGCCGATTCAGAAGCAAATCAATTATCTAGAGCACAAATCGCTAGATGACTTT  
GTACTATCTGACGAGGATCGAAAAACAGATACATCTGGACTTGCAACGAGCCGATTCA  
TGTGATGGAGATTTTCAAGTATGAACTATCTGAAACGATTGATCCTGAAACATTCTCGCAT  
TTGTGTGAAGAAATGCGTATC

>Tilapia\_SIRT2

ATGTCTGATTCGTCAGAACTTCCTAAATCAGAAAAAGAGGAGGAGGTCCTCCCGAACCA  
GAGGAACAATCCGACGACAGCAGTGAAGACGAGGCTGCAGGAGACACAGACATGGACTTC  
CTGCGCAACCTCTTCTCCAGCGCGCTGGCCTCGGTTTCAGCTGAGAAAGTCTAGATGAG

CTGACTCTGGATGGAGTGGCAGGATACATAAACAGCGGCAAATGTAAAAACATCATCTGC  
ATGTTGGAGCAGGAATATCCACATCTGCTGGAATCCCAGATTTTCGCTCTCCAGGAACT  
GGCCTGTACGCAAACCTGCAAAAATCAACTTGCCTTACCCAGAGGCTATTTCCAGATA  
GATTACTTTAAGAAACATCCAGAGCCATTCTTGCCTTGGCAAGGGAGCTTTACCCAGGA  
CAGTTTAAGCCAACAATCTGTCACTATTTTCATGAAGATGTTGAAAGACAAAGGCATCCTG  
AGACGCTGTACACACAGAATATCGACACGCTGGAGCGAGTAGCCGGGCTCGAAGGAGAT  
GACCTAATCGAAGCTCACGGGACGTTCTACACGTCACTGTGTCAGCTTCTGCTGCCGG  
AAGGAGTACAGCCTGGAGTGGATGAAAGAGAAAATCTTTTCTGACGACATTCCCAAATGT  
GACAAGTGCAGCAGTTTGGTTAAACCAGATATTGTCTTCTTTGGAGAGAACCTACCTGCC  
AGATTCTCACTTCAATGAAGATGGATTTTCTCGTTGCGACCTTCTCATCGTTATGGGG  
ACGTCCCTTCAGGTCCAACCATTTGCGAGTCTAGTCAGCAGGGTTTCAAAAAGTTGCCCC  
AGACTGCTCATTAAACATGGAGAAAGCAGGGCAGGTTAATCCCATGATGGGTTTGTGGT  
TTCGGAGAAGGGATGGACTTTGACTCAGACAAGGCTTACAGAGATGTCGCTCACATTAGT  
ACATGTGATGATGGATGTTTGGCTCTAGCTGATCTTCTGGGATGGAAGGAAGAGCTGGAA  
GAGCTGGTGAAGAAGGAGCACACCAAGATCGACAGTCAGGATGCAAAAAGAGAAGGCCAGT  
GAAAACAAAGGAGCTACAGCCAAGGCGAGCTCTGCATCAGCGCCACCAGAACCCAAAGCT  
GAGGAG

>Tetradon\_SIRT2

ATGTCTGATGCATCAGAATTACCTAAAAAAGAAGAGGGGGCGTTATCACCGAATTACAG  
GAACAGTCAGACGACAGCAGTGAAGACGAGGCTGCAGAAGACAGTATGTTGGACTTCCTG  
CGTAATCTTTTCTCTAGAAACCTGGGCATTGGCACCCAGACAAGTTCTCGATGAGCTG  
ACTCTGGAGGGGGTGGCGCAATATATAAAAAGTGAAAATGTAAAAACATCATCTGCATG  
GTCGGAGCAGGGATTTCCACCTCGGCTGGTATCCCTGATTTTCGCTCCCCTGGAAGTGGC  
CTGTATGCAAACCTGCAGAAGTATAACCTGCCTTACCCAGAGGCC

>Spotted\_gar\_SIRT2

ATGTCTGACCCACCAGCTCCTGACAAAAAGGACGAAGAGGCCACAATCGCAGAGCCTGAG  
GAGGACCAATCAGGGGACAGCAGCGACGAGGGCGGGGCCACTGGAGACACTGAGATGGAG  
TTCCTGAGGAATCTGTTTTCGCAGACTCTGGGTCTCGGTTCCGTTCTAGGGAGAAGGTT  
CTGGATGAGCTGAGCTTGGAGGGGGTGGCCCGATACATCCAGAGCGGCAACTGTAAAAAC  
GTTATCTGCATGGTGGGAGCAGGAATATCGACGTCGGCTGGCATTCCAGATTTCCGCTCT  
CCTGATACGGGGCTGTATGCCAACCTGCAGAAGTACAACCTGCCCTACCCTGAGGCCATC  
TTTCAGATCGACTACTTCAAGAAACACCCAGAGCCTTTCTTTGCCCTGGCCAGAGAGCTG  
TACCCCGGGCAGTTCAAGCCCACAGTGTGTCATTACTTCATCCGGATGCTGAAGGACAAG  
GGGCTGCTGAGGCGTTGCTACTCCAGAACATTGATACACTGGAGCGGGTGGCAGGGCTA  
CAGGGAGATGACCTGGTTGAAGCCCATGGCACGTTCTACACCTCCCACTGTGTCAGTTTC  
CTCTGCCGAAAGAGTACACCCTGGACTGGATGAAAGAGAAGATCTTTCAGATGAGATC  
CCAAAGTGTGACAAGTGCAGCAGCCTTGTGAAGCCTGACATTGTGTTCTTCGGGGAGAAC  
CTCCAGCTCGATTCTTCACTTCGTTGCAGATGGATTTCCCTCGCTGTGATCTCCTCATC  
ATCATGGGCACCTCCCTGCAGGTCCAGCCATTTGCTTCACTAGTCGGCAAGGTCTCTGCT  
AGAACCCACGGCTTCTGATAAAACAAAGAGAAGACAGGACAGTCAGACTCTCTGATGGGA  
TTCCTGGGCTTTGGTGGAGGAATGGACTTTGATTGAGAGAAAGCATAAGGGATGTGGCG  
TATCTGGGGACCTGCGATGATGGCTGTCTTGTCTCGCGGACCTGCTGGGCTGGAAGACC  
GAGTTGGAGGAGCTGGTGAAGCAGGAGCACACTTAATTGACAGCAAGGACAAGCGGGAG  
AAGGCCAGCGCAGCCAATCAGAACTCTGGGGCGGGGCAAAAAGGCAGGCCTGGGGGTGGAG

CCCAGGGAGAGTGACAAACCTGAGCAGCCAATGGGAGAAGGCAGCTCAAAGCAGGAC

>Pig\_SIRT2

ATGGCCGAGCCGGATCCCTCAGACCCTGTGGAGACCCAGACAGGGAAGGTGCAAGAGGCT  
CAGGACTCCGATTCCGATTCCGACACTGAGGAAGGAGCAGCTGGTGGAGAAGCCGAGATG  
GACTTCTGCGGAATTTCTTCTCCAGACCCTGGGCCTGGGCACCCAGAAGGAGCGTCTG  
CTGGACGAGCTCACCTGGAAGGGGTGTCCTGCTACATGCAGAGTGAGCGCTGTCGCAGG  
GTCATCTGTTTGGTGGGAGCTGGAATCTCCACGTCCGCGGGCATCCCTGACTTCCGCTCC  
CCGTCCACGGGCCTCTATGCCAACCTGGAGAAGTACCGTCTGCCCTACCCGGAGGCCATC  
TTTGAGATTGGCTACTTCAAGAAACATCCAGAGCCCTTCTTCGCCCTCGCCAAGGAACTC  
TATCTTGGGCAGTTCAAGCCGACCATCTGTCACTACTTTCATCCGCTGCTGAAGGAGAAA  
GGGCTGCTCCTGCGCTGCTACACGCAGAACATAGACACCCTGGAGCGAGTGGCGGGACTA  
GAGCCCGAGGACCTGGTGGAGGCCATGGCACCTTCTACACGTCACTGCATCAGCCCC  
CTCTGCCGGCAGGAGTACACGCTAGGCTGGATGAAAGAGAAGATCTTCTCCGAGGTGACC  
CCCAAGTGTGAGAAATGTCAGAGCGTGGTGAAGCCTGATATCGTGTCTTCGGTGAGAAC  
CTCCAGCGCGTTTCTTCTCCTGCATGCAGTCAGACTTCTGAAGGTGGACCTTCTCATC  
GTCATGGGCACCTCCCTGCAGGTGCAGCCCTTCGCATCCCTCATCAGCAAGGCGCCCCCTC  
TCCACCCACGCCTGCTCATCAACAAGGAGAAGACCCGCCAGACTGACCCGTTCTCGGG  
ATGATGATGGGCCTCGGAGGAGGCATGGACTTCGATTCAAAAAAGGCGTACAGGGACGTG  
GCCTGGCTGGGTGACTGCGACCAGGGCTGCTTGGCCCTCGCTGATCTCCTCGGATGGAAG  
AAGGAGCTGGAGGACCTTGTCCGGAAAGAGCATGCCAGCATAGATGCCAGTCGGGATCG  
GGCACCCCAATCCACCACTTCAGCTTCCCCCAGGAAGTCTCCGCTCCCGCCAAGGCA  
GAGGCCAGGACCTCGGAGGGAGAGAAACCCAG

>Panda\_SIRT2

ATGGCCGAGCCGGACCCCTCTGACCCTTGAGACCCAGGCAGGGAAGGTGCAGGAGGCC  
CAGGACTCAGATTCAGACACTGAGGAAGGAGCGCTGGGGGGGGGGGGGGGAAGCAGAG  
ATGGACTTCTGCGGAATTTCTTCTCCAGACACTGGGCCTGGGCACCCAGAAGGAGCGT  
CTGCTGGACGAAGTACCCTGGAAGGAGTGACCCGCTATATGCAGAGCGAGCGCTGTGCG  
AGGGTCATCTGTTTGGTGGGAGCTGGGATCTCCACGTCTGCCGGCATCCCTGACTTCCGC  
TCCCCATCCAGGGCCTCTACGCCAACCTAGAGAAGTACCATCTTCCCTACCCGGAGGCC  
ATCTTTGAGATTGGTTACTTCAAGAAACACCCAGAGCCCTTCTTTGCTCTGGCCAAGGAA  
CTCTATCCTGGGCAGTTCAAGCCGACGGTCTGTCACTACTTTCATCCGCTGCTGAAGGAG  
AAGGGACTGCTGCTGCGCTGCTACACGCAGAACATAGACACGCTGGAGCGAGTGGCAGGG  
CTGGAGAGCGAGGACCTGGTGGAGGCCACGGCACCTTCCACACCTCGCACTGCACCACT  
CCCCTCTGCCAGGGAGTATACGCTCAGCTGGATGAAAGAGAAGATCTTCTCCGAGGTG  
ACTCCAAGTGTGAGAAATGCCACAGCGTGGTGAAGCCTGACATCGTGTCTTCGGTGAG  
AACCTCCAGCGAGGTTCTTCTCCTGCATGCAGTCAGACTTCTGAAGGTGGATCTCCTC  
ATCATCATGGGCACCTCCCTGCAGGTGCAGCCCTTCGCCTCCCTCATCAGCAAGGCACCC  
CTCTCCACCCCGCTGCTCATCAACAAGGAGAAGACTGGGCAGACTGACCCTTTCCTG  
GGGATGATGATGGGCCTCGGAGGAGGCATGGACTTCGACTCCAAGAAGGCCTACCGGGAC  
GTGGCCTGGCTGGGAGACTGTGACCAGGGCTGCTTGGCCCTGCTGACCTCCTCGGCTGG  
AAGAAGGAGCTGGAGGACCTTGTCCGGAAGGAGCATGCCAACATAGATGCCAGGCAGGG  
TCAGAGGGCCCAACCCCAACTTCAGCTTCCCCCAGGAAGTCTCCACCTCCTGCCAAG  
GAAGAGGCCAGGAGCACGGAGGGAGAGAAAGCCCCAG

>Western\_painted\_turtle\_SIRT2

ATGGCCGAGCGGGACGCGGGGGTGCCGGAGAAATTGAGGCAGAGAGGGGCTCAGACTCG  
CCTGACTCCGATTCTGACTCCGAAAACGGTGGCGCCTCTGGAGAGTCTGAAATGGATTTC  
CTGCGACACCTCCTGTCCCGGACGCTGGGCCTGGGCAGCGAGAAGCCGGAGAAGGTGCTG  
GATGAGCTGACGTTGGACGGAGTGAGCCGCTTCATGCAAAGCGAGAAGTGCAGGAACGTC  
GTCTGCATAGTGGGCGCTGGGATCTCAACCTCCGCGGGGATCCCGGACTTCCGGTCGCCC  
GGCACGGGGCTCTACGCAATCTGCAGAGCTACAACCTGCCGTACCCTGAAGCCATCTTC  
GAAATCAACTACTTCAAGCAACACCCGGAGCCGTTCTTTGCCCTTGCCAGGGAGCTGTAT  
CCAGGACAGTTTAAGCCACCGTGTGCCACTACTTCATCCGGCTGCTGAAGGAGAAGGGT  
TTGCTGCTGCGCTTTACACGCAGAATATTGACACGTTGGAGCGGGTGGCCGGACTGGAC  
CAGGAAGATCTGGTGAAGCCACGGCACCTTCTCACCTCTCACTGTCTCGGCTCCTCC  
TGCAAGAAACAATACACCCTGGACTGGATGAAAGAAAAGATTTTCTCGACTGTCACTCCC  
AAGTGCGACAAATGTCAGAGTCTGGTGAAGCCGGATATCGTGTCTTTGGGGAGAGCCTG  
CCCCCGCTTCTTCACTCATGCAGTCGGATTTCCAGAAGGTGGACCTGCTCCTCATC  
ATGGGCACATCGCTGCAGGTGCAGCCCTTCGCTCCCTCGTCAGCAGGGTGGCCACAAAC  
ACCCCGAGGCTGCTGATTAACAAGGAGAAGACGGGGCAGAGTGATCCCTTCATGTCCCTG  
ATGGGCCTCAGCACCGGCATGGACTTCGACTCGGAAAAGGCCTACAGGGATGTGGCATGG  
CTCGGGGAGTGCAGCAAGGCTGCACCGCTGGCCGAGCTGCTGGGATGGAAGAACGAG  
CTGGAGGAGCTGGTGAAGAAGGAGCACTTGCCATCGATGCCAAGTCGGGGCAGGCAGGC  
GAGGCCGGGAGAAGCCCTTCCCCTCCCCGGCTGGGGCCACGGCAAGCCCTCCCCTCCC  
CCAGCGAAGCCGGGGTTCATCGCCCCAGAAGGAAAAGCGACGCCGGAAGCAAAGCGGAA

>Orangutan\_SIRT2

ATGGACTTCCGCGAACTTATTCTCCAGACGCTCAGCCTGGGCAGCCAGAAGGAGCGT  
CTGCTGGACGAGCTGACCTTGAAGGGGTGGCCCGGTACATGCAGAGCGAACGCTGTGCG  
AGAGTCATCTGTTTGGTGGGAGCTGGAATCTCCACATCCGCAGGCATCCCCGACTTTCG  
TCTCCATCCACCGCCTCTATGACAACCTAGAGAAGTACCATCTTCCCTACCCAGAGGCC  
ATCTTTGAGATCAGCTATTTCAAGAAACATCCGGAACCTTCTTCGCCCTCGCAAGGAA  
CTCTATCCTGGGCAGTTCAAGCCAACCATCTGTCACTACTTCATGCGCCTGCTGAAGGAC  
AAGGGGCTACTCCTGCGCTGCTACACGCAGAACATAGATACCCTGGAGCGAATAGCCGGG  
CTGGAACAGGAGGACTTGGTGGAGGCGCACGGCACCTTCTACACATCACTGCGTCAGC  
GCCAGCTGCCGGCACGAATACCCGCTAAGCTGGATGAAAGAGAAGATCTTCTGAGGTG  
ACGCCAAGTGTGAAGACTGTCAGAGCCTGGTGAAGCCTGATATCGTCTTTTTGGTGAG  
AGCCTCCCAGCGGTTTCTTCTCCTGTATGCAGTCAGACTTCTGAAGGTGGACCTCCTC  
CTGGTCATGGGTACCTCCTTGCAGGTGCAGCCCTTGCCTCCCTCATCAGCAAGGCACCC  
CTCTCCACCCTCGCCTGCTCATCAACAAGGAGAAAGCTGGCCAGTCGGACCCTTTCCTG  
GGGATGATTATGGGCCTCGGAGGAGGCATGGACTTTGACTCCAAGAAGGCCTACAGGGAC  
GTGGCCTGGCTGGGTGAATGCGACCAGGGCTGCCTGGCCCTTGCTGAGCTCCTTGGATGG  
AAGAAGGAGCTGGAGGACCTTGTCGGGAGGGAGCACGCCAGCATAGATGCCAGTCGGGG  
GCGGGGGTCCCCAACCCAGCACTTCAGCTTCCCCCAAGAAGTCCCCGCCACCTGCCAAG  
GACGAGGCCAGGACAACAGAGAGGGAGAAACCCAG

>Opossum\_SIRT2

ATGGCCGAGGCGGACCCCCCGTCCCCCAGGACGAGGCAGGGAAGGTGCTGGATGCT  
CAGGACTCGGATTCAGACATTGAGAGTGGAGCCTCATCTGGAGAGACTGAGATGGATTTT  
TTAAGAAATCTTCTCCCGACCTGGGCCTGGGCAGCGAGAAGCGGGAAAAGCTGCTG  
GATGAACTTCTTGGAAAGGGGTACAAGTTTCATCCAGAGTGATCGATGTCAGAACATC

ATCTGCATGGTGGGGGCCGGAATCTCTACATCTGCAGGCATCCCTGACTTTCGATCCCCG  
ACCACCGCCTGTATTCCAACCTGGAGAAGTACAACCTCCATATCCTGAAGCTATCTTT  
GAAATCAACTACTTTAAGAAACACCCTGAGCCTTTCTTCGCCCTGGCCCCGGGAGCTGTAC  
CCAGGGCAATTTAAGCCCACCGTGTGCATTACTTCATTTCGTCTGCTCAAGGAGAAGGGG  
CTGCTGCTTCGATGCTATACCCAGGTGAGGACATCTAGGGTCGGGAGGTGGGGAGGAGGA  
GATGCCACACACTGGGCTTTGGGCAGTCAGGCCTA

>Naked\_mole\_rat\_SIRT2

ATGGACTTCCTGAGGAGTCTCTTCTCTCAGACCCTGGGCCTGGGCTCCCAGAAGGAGCGT  
CTGCTGGATGAGCTAACTCTGGAAGGGGTGGTCCGCTACATGCAGAGCGAGCGCTGTACG  
AGGGTCATCTGCTTGGTGGGAGCTGGAATCTCCACATCTGCGGGCATCCCCGATTTCCGC  
TCTCCAACCACTGGCCTCTATGCCAACCTGGAGAAGTACCATCTTCCCTACCCCCGAGGCC  
ATCTTTGAGATTGGCTATTTCAAGAAACATCCGGAACCCTTCTTTGCCCTTGCCAAGGAA  
CTGTATCCTGGGCAGTTCAAGCCGACCATCTGTCACTACTTCATCCGCCTGCTGAAGGAG  
AAGGGGCTGCTCTGCGCTGCTACACACAGAACATTGACACCCTGGAGCGTGTGGCCGGC  
CTGGAGCCCCGAGGACCTGGTGGAGGCCACGGCACCTTCTACACATCACACTGCACCAGC  
CAGCTCTGCCGGCACGAGTACACACTGGGCTGGATGAAAGAGAAGCTTCTCTCGGAGGTG  
ACCCCAAGTGCAGAAATGTGAGAGCGTGGTGAAGCCTGACATCATCTTTTTCGGCGAG  
AACCTCCCGTCTCGTTCTTCTCCTGCTTGCAGTCAGACTTCCGGAAGGTGGACCTGCTC  
ATCATCATGGGCACCTCGCTGCAGGTGCAGCCCTTCGCCTCTCTCATTGGCAAAGCACCC  
CTGTCCACCCCTCGCTGCTCATCAACAAGGAGAAGACTGGCCAGACTGACCCCTTCTG  
GGAATGATGATGGGCCTGGGAGGAGGCATGGACTTTGACTCCAAGAAGGCCTACAGGGAC  
GTGGCCTGGCTGGGTGACTGTGACCAGGGCTGCCTGGCCCTCGCCGACCTCCTTGGATGG  
AAGAAGGAGCTCGAGGACTTGGTCCGGAAGGAGCACGCCACATAGATGCCAGTCGGGG  
TCCAGCACTCCAACCCTACCACTGCAGCTTCCCCAGGACATCCCCACCTCCTGGCAAG  
GCAGAGGCCAAGACCACAGATGGGGAGAAGCCCCAG

>Medaka\_SIRT2

ATGTCTAATGCTGCAGATCTTCCAAAAGCAGAGGAGGAGGAGGAGGTACCCCGGATTTA  
CAGGATCTGTGGACGACAGCAGTGACGACGAGGCGGCAGCAGGAGCTGAGATGGACTTC  
CTGCGAACCTCTTCTCCAGCACTTTGGGCCTCGGCTCTGCAGAGAAGGTTCTGGATGCT  
CTGACTCTGGAAGGAGTGGCTCAGTATATAAAGAGCGGCAAATGTAAAACATCATCTGC  
ATGGTTGGTGCAGGAATCTCCACATCTGCTGGAATTCAGATTTCCGTTCTCCAGAAACC  
GGCCTGTATGCAAACCTGCAGAAATAAACCTGCCTTACCCAGAAGCCATCTTCCAGATA  
GATTACTTTAAGAAACATCCAGAACCCTTCTTTACTTTGGCGAAGGAGCTTACCCAGGA  
CAGTTTAAGCCAACCATCTGTCACTACTTCATAAAGTTGCTGAAGAACAAAGGCCTCCTG  
AGACGCTGCTACACTCAGAACATCGACACTCTGGAGCGAGTTGCAGGTCTTGAAAAAGAA  
GATCTGATTGAAGCTCATGGGACCTTCTACACCTCCCACTGTGTCAGCTTCTGCTGCCGT  
AAAGAGTACAGCCTGGACTGGATGAAAGAGAAAATCTTCTCTGATGCCATTCCAAATGT  
GAGAAGTGCAACAGTTTGGTGAACCAGGTCAGGTCCTGATGTTTGATCCTGCTGTTTGG  
TCGGTCGCTCTCTGCAGGGATGTGGCTCACATCAGTTCCTGTGATGACGGCTGCCTGGCT  
CTGGCTGACCTGCTGGGCTGGAAGGCCGAGCTGGAGGCTCTGGTGAAGCAGGAGCACGCT  
CAGATCGACAGTAAAGACAAGAAGGAGCAGCCTGGAGAAGCTGGAGGAGCGGCGGCCAAA  
GCCAGCTCGTCTCTGTGAAGCCAGAGGAG

>Macaque\_SIRT2

ATGGCAGAGCCGGACCCCTCTCACCTCTGGAGACCCAGGCAGGGAAGGTGCAGGAGGCT

CAGGACTCAGATTCAGACTCTGAGGGAGGAGCCGCTGGTGGAGAAGCAGACATGGACTTC  
CTGCGGAACTTATTCTCCAGACGCTCAGCCTGGGCAGCCAGAAGGAGCGTCTGCTGGAC  
GAACTGACCTTGAAGGGGTGGCCCGTACATGCAGAGCGAACGCTGTGCGAGAGTCATC  
TGTTTGGTGGGTGCTGGAATCTCCACATCTGCGGGCATTCCCGACTTTCGTTCTCCATCC  
ACTGGCCTCTATGACAACCTAGAGAAGTACCATCTTCCCTACCCAGAGGCCATCTTCGAG  
ATCAGCTATTTCAAGAAACATCCGGAACCCTTCTTCGCCCTCGCCAAGGAGCTCTATCCT  
GGGCAGTTCAAGCCGACCATCTGTCACTACTTTATGCGCCTGCTGAAGGACAAGGGGGCTG  
CTCCTGCGCTGCTACACGCAGAATATAGATACCCTGGAGCGAATAGCGGGGCTGGAACAA  
GAGGACTTGGTGGAGGCCACGGCACCTTCTACACGTCGCACTGCGTCAGTGCCAGCTGC  
CGGCACGAATACCCGCTAAGCTGGATGAAAGAGAAGATCTTCTCTGAGGTGACGCCAAG  
TGTGAGGACTGTCAGAGCCTGGTGAAGCCTGATATCGTCTTTTTTGGTGAGAGCCTCCCA  
GCGCGTTTCTTCTCCTGTATGCAGTCAGACTTCTGAAGGTGGACCTCCTCCTCGTCATG  
GGCACCTCCTTACAGGTGCAGCCCTTTCCTCCCTCATCAGCAAGGCACCCCTCTCCACC  
CCTCGCCTACTCATCAACAAGGAGAAAGCTGGCCAGTCGGACCCTTTCCTGGGGATGATC  
CTGGGCCTCGGAGGAGGCATGGACTTTGACTCCAAGAAGGCCTACAGGGACGTGGCCTGG  
CTGGGTGACTGCGACCAGGGCTGCCTGGCCCTTGCTGAGCTCCTCGGATGGAAGAAGGAG  
CTGGAGGACCTTGTCCGGAGGGAGCACGCCAGCATAGATGCCAGTCGGGGGCGGAGGCC  
CCTAACCCAGCACTTCAGCTTCCCCAGGAAGTCCCCGCCACCTGCCAAGGACGAGGCC  
AGGACAACAGAGAGGGAGAAACCACAG

>Human\_SIRT2

ATGGCAGAGCCAGACCCCTCTCACCTCTGGAGACCCAGGCAGGGAAGGTGCAGGAGGCT  
CAGGACTCAGATTCAGACTCTGAGGGAGGAGCCGCTGGTGGAGAAGCAGACATGGACTTC  
CTGCGGAACTTATTCTCCAGACGCTCAGCCTGGGCAGCCAGAAGGAGCGTCTGCTGGAC  
GAGCTGACCTTGAAGGGGTGGCCCGTACATGCAGAGCGAACGCTGTGCGAGAGTCATC  
TGTTTGGTGGGAGCTGGAATCTCCACATCCGCAGGCATCCCCGACTTTCGCTCTCCATCC  
ACCGGCCTCTATGACAACCTAGAGAAGTACCATCTTCCCTACCCAGAGGCCATCTTTGAG  
ATCAGCTATTTCAAGAAACATCCGGAACCCTTCTTCGCCCTCGCCAAGGAACTCTATCCT  
GGGCAGTTCAAGCCAACCATCTGTCACTACTTCATGCGCCTGCTGAAGGACAAGGGGGCTA  
CTCCTGCGCTGCTACACGCAGAACATAGATACCCTGGAGCGAATAGCCGGGCTGGAACAG  
GAGGACTTGGTGGAGGCGCACGGCACCTTCTACACATCACTGCGTCAGCGCCAGCTGC  
CGGCACGAATACCCGCTAAGCTGGATGAAAGAGAAGATCTTCTCTGAGGTGACGCCAAG  
TGTGAAGACTGTCAGAGCCTGGTGAAGCCTGATATCGTCTTTTTTGGTGAGAGCCTCCCA  
GCGCGTTTCTTCTCCTGTATGCAGTCAGACTTCTGAAGGTGGACCTCCTCCTGGTCATG  
GGTACCTCCTTGCAGGTGCAGCCCTTTCCTCCCTCATCAGCAAGGCACCCCTCTCCACC  
CCTCGCCTGCTCATCAACAAGGAGAAAGCTGGCCAGTCGGACCCTTTCCTGGGGATGATT  
ATGGGCCTCGGAGGAGGCATGGACTTTGACTCCAAGAAGGCCTACAGGGACGTGGCCTGG  
CTGGGTGAATGCGACCAGGGCTGCCTGGCCCTTGCTGAGCTCCTTGGATGGAAGAAGGAG  
CTGGAGGACCTTGTCCGGAGGGAGCACGCCAGCATAGATGCCAGTCGGGGGCGGGGGT  
CCCAACCCAGCACTTCAGCTTCCCCAAGAAGTCCCCGCCACCTGCCAAGGACGAGGCC  
AGGACAACAGAGAGGGAGAAACCCAG

>Horse\_SIRT2

ATGGCCGAGCCGGACCCCTCTGACCCTCTGGAGACCCAGGCAGGGAAGGTGCAGGAGGCT  
CAGGACTCAGATTCAGACTGAGGGAGGAGCGGCTGGCGGAGAAGCAGAAATGGACTTC  
CTGCGGAACTTCTTCTCCAGACGCTGGGCCTGGGCACCCAGAAGGAGCGTCTGCTGGAC

GACCTCACCTGGAAGGGGTGGCCCGCTATATGCAGAGCGAGCGCTGTCGCAGGGTCATC  
TGTTTGGTGGGAGCTGGAATCTCCACGTCCGCGGGCATCCCTGACTTCCGCTCCCCATCC  
ACCGGCCTCTACGCCAACCTGGAGAAGTACCACCTTCTTACCCGGAGGCCATCTTTGAG  
ATTGGCTACTTCAAGAAACATCCAGAGCCCTTCTTTGCCCTCGCCAAGGAGCTCTATCCT  
GGGCAGTTCAAGCCCACCGTCTGTCACTACTTCTGCGCCTGCTGAAGGAGAAGGGGCTG  
CTCCTGCGCTGTACACGCAGAACATAGACACCCTGGAGCGCGTGGCGGGGCTGGAGCCT  
GAGGACCTGGTGGAGGCCACGGCACCTTCTACACGTGCACTGCATCAGCCCCGTCTGC  
CGGCGGGAGTACACGCTGGGCTGGATGAAAGAGAAGATCTTCTCCAGGTGACTCCCAGG  
TGCGAAAAGTGTACAGAGCGTGGTGAAGCCTGACATCGTGTCTTCGGGGAGAGCCTCCCA  
GCGCGTTCTTCTCCTGCATGCAGTCAGACTTCTGAAAGTGGACCTCCTCATCATCATG  
GGCACCTCCCTGCAGGTGCAGCCCTTTCATCCCTCATCAGCAAGGCGCCCTGTCCACC  
CCGCGCCTGCTCATCAACAAGGAGAAAGCTGGCCAGACGGACCCCTTCTGGGAATGATG  
ATGGGTCTCGGCGGAGGCATGGACTTTGACTCCAAGAAGGCCTACAGGGACGTGGCCTGG  
CTGGGGGACTGCGACCAGGGTGCCTGGCCTTGCTGACCTCCTCGGATGGAAGG

>Anole\_lizard\_SIRT2

ATGGAGAGTCGGGAAGACCCCGGAGCTGCCGCCACCTCCTCCGCCAGTAACGAAGCCGAT  
GCGGCCGAGAGAGGGAAGCAGCGTCCGGCTCCTCGGTTCCGATTCTGATGACGAAGGT  
GGGGCTTCTGGATTGACCGAAATGGAGTTTTTGCGAAATCTTTGTCCCGGACATTAAC  
TTGGGCAGCGAGAAGCCTGAAAAAGTCTGGATGAGCTGACCTTGGAGGGAGTGAGCAGA  
TACATGCTGACTGAAAAATGCAAAAATGTGGTGTATGTTGGAGCAGGAATCTCGACT  
GCTGCTGGGATTCCAGATTTCCGCTCCCCAGGGACAGGGCTCTATGCCAATCTGCAGCAG  
TACAACCTGCCATACCCTGAAGCCATCTTTGAGATCAACTACTTCAAGAAACACCCGGAA  
CCATTTTTTGCTTTGGCCCGGAGCTATACCCAGGACAGTTCAAGCCCACAGTTTGTAC  
TACTTCATGCGCCTCTAAAAGAGAAAGGGTTGCTGCTCCGTTGCTACACACAGAACATT  
GATACCTTGGAGCGGGTAGCTGGTCTGGATCATGAAGATTTGGTAGAAGCTCATGGCACC  
TTCTTTACCTCGCACTGCATCAGCCCCACCTGTAAGAAGATGTACAGCTTGGAGTGGATG  
AAAGAAAAGATCTTTTCTCTCATCCCAAATGTGAAAAATGTGAGAGTGTGGTGAAG  
CCAGATATCGTGTCTTTGGGGAAAATTTGCCCTCTCGGTTCTTCTCCCTGATGCAGTCA  
GATTTCCAGAATGTGGACTTGCTTATTATCATGGGCACTTCCCTCAGGTCCAGCCCTTT  
GCCTCACTTGTGGCAGAGTCCCCACAAACACCCACGGCTTCTTATCAATAAAGAAAAG  
ACAGGGGAGAGTGACCCTTTTATGTCCTTGATGGGCTTTGGCTGTGGGATGGACTTTGAC  
TCAGAAAAGGCATACAGGGATGTTGCATGGCTTGGAGATTGTGATGAAGGCTGCTATGCT  
TTGGCTGAGTTTTTGGGATGGAAGAAGGAGCTTGAAGACCTGGTGAAGAGTGAAGCATGCC  
ACCATTGATGCCAAGTCAGGGCAGGCGTTGGTGTGATGGGGCGAGCGCCTCCCGCCCTCAC  
AAGAAGGACCACCAGCAGAAACCGTCCCCAAAGAGAGAAAGGCCTCCTCACCCCAAGAT  
GAA

>Fugu\_SIRT2

ATGTCTGATGCATCAGAAATACCTAAAAAAGAAGAGGGGGCTTTAGCACCTGAGCCAGAG  
GAAGAGTCCGACGACAGCGGTGAGGACGAGGCTACAGAAGACATGGAGTTCCTGCGTAAT  
CTTTTCTCGAAAACCTGGGCATTGGCACCCCAGACAAGGTTCTCGATGAGCTGACTCTG  
GAGGGAGTAGCACAGTATATAAAGAGTGGAAAATGTAAAAACATCGTCTGCATGGTTGGA  
GCAGGGATATCCACCTCGGCTGGGATCCCTGATTTTCGCTCACCTGGAAGTGGCCTGTAT  
GCAAACTGCAGAAGTATAACCTGCCGTACCCAGAGGCGATCTTCCAGATTGATTACTTC  
AAGAAACATCCAGAGCCTTTCTTTGCTTTGGCCAGAGAGCTTTACCCAGGACAGTTAAG

CCCACAGTTTGTCACTACTTCATGAAGCTGCTGAAGGATAAAGGACTCCTGAGGCGGTGC  
TACTCGCAGAATATTGACTCTGGAGCGTGTGGCTGGCCTCGAGGGGGACGACCTCATT  
GAAGCTCATGGAACGTTCTACACATCCCCTGTGTGCTGCTGCGCAAGGAGTAC  
TCGCTGGGCTGGATGAAAGAAAAATCTTTCCGACGACGTTCCCCGGTGTGAGAAATGC  
AGCAGCTTGGTGAACCCGATATCGTCTTCTTTGGGGAGAATCTTCTCTTCGTTTCTTC  
ACTTCTGTTAAGTCTGACTTCCCTCGTTGTGACCTCCTCATCATGAGGGACGTCCCTG  
CAGGTCCAACCTTTGCCAGTCTTGTGACGAGGTTTCCAAAAGTTGCCCCAGACTGCTC  
ATAACATGGAAAAGGCTGGTCAGGCTAATGCTCTGTTTGGGATTCTCGGTTTGGCGGA  
GGGATGGACTTTGACTCAGACAAGGCATACAGAGATGTCGCTCACATCAGTACCTGTGAC  
GATGGCTGTTTGGCTTTGGCTGACCTATTGGGGTGAAGGCAGAGCTGGAGGATTTGGTG  
AAGCAGGAACACGCCAGGATTGACAGCCAGGACCAAAGCAGTGAGAGCAAAGGGGCTCCG  
GCCAAGGCGAGCTCCGCCTCCGCGGCGCCGACGACAAACGGGGGACAGGAG

>Great\_tit\_SIRT6

ATGGCGGTGAATTACGCGGCCGGGCTGTCCCCGTACTCGGACAAGGGCAAGTGCGGCCTC  
CCCAGATTTTCGACCCTCCGGAGGAGCTGGAGCGGAAGGTGCAGGAGCTGGCAGACCTG  
ATCCGGAGCTCCTCAATGTGGTGTTCACACAGGAGCAGGGATCAGCACGGCCTCGGGG  
ATCCCTGACTTCAGAGGTCCAATGGTGTCTGGACTATGGAAGAGAAAGGGCTCTCCCA  
AAATTCGACACCACCTTTGAGAACGCCAGGCCCTCAAGACTCACATGGCGCTGCTGGGG  
CTGCAGAGAGTGGGAATCCTGAAATCCTGGTCAGCCAGAACGTGGACGGCCTGCACGTG  
CGGTCAGGATCCACGGGACAAGTTGGCCGAGCTCCACGGGAACATGTTTGTGGAAGAG  
TGCGTGAAATGCGGGAAGCAGTACGTGCGCGACGCCGTCGTGGGCAGCATGGGGCTCAAG  
CCCACGGGGCGCCTCTGCAGCGTCACCAAGGCCCGGGGGCTGCGGGCCTGCAGAGGGAAG  
TTACGAGACTATTCTGATTGGGAAGATTCCCTGCCCGACCGTGACCTGACTGACACTGGCA  
GATGAAGCCTGCAGGAAAGCCGATCTCTCCGTACCCTGGGGACCTCTCTGCAGATCAA  
CCCAGCGGGAACCTCCCACTGATCACCAAGAAGAGAGGAGGAAAGTTGGTCATTGTCAAC  
CTCCAAGCAACCAACACGTGGCCTCTTAGCAGGCAAACAGGCTGGGAGTCTGGGTT  
GGAGGGTTTGAACCTGCAACTCCTGCTGAACACGCAGAGATTGCAGGACCGCCAGGCCGA  
CCTGCGCATCCACGGCTACGTGGACGAGGTGATGACCAAGCTGATGAAGCACCTGGGGCT  
GGAGGTGCCGAGTGGACGGGGCCGGTGGTGGTGGAGAGCGCCGAGCTGGCCAAGGCCGA  
GCAGCTGCAGGGGCGGCTGAAGGAGGAGCCGCTGTCCAGCACAAACGGCACGGGAGCGCC  
GTGTCCCGGGAACGCGCCGCTGGAGCGCCGACGGGCTCAAGCTGGAGTGTCCAGCCC  
GGACACGGGGCCGACACCGGTGAAGAAGATGAAGGTGGAGCCTCTCCTCACCTGACCTGG  
ACTGTCCCTGTCTACCTGGGCTGTTTTCTACCAACTTTTTTTTATACCCTTAAATAT  
TGTCCTTTTTTTATGTCAGTATTAACACACT

>African\_ostrich\_SIRT6

ATGGCCACCCTCTTCTCCGCTGTGGCTCGCTGGCCCCGAGCCCTGTCGAGCCCGCGGCT  
CTGCTGGGGAACGGTGCCGGGATCAGTGCACCTGGGCTGGCCCCGGGGTCTGCTCCCTTC  
CTCCTGCTGCTCCACTGTGCCCTTGATCCAAGATGCTTCTGTGGGTATCAGATTTTTGAT  
CCTCCGGAGGAGCTGGAGAGGAAAGTGCCTGAACTGGCAGATTTGATAAGGAGTTCCTCG  
AACGTGGTGTTCACACAGGGGCTGGAATCAGTACTGCCTCAGGGATTCCCGACTCAGG  
GGGCCAAATGGTGTCTGGACTATGGAAGAGAAGGGCTCTCCCCAAAATTTGACACCACC  
TTTGAAGATGCCAGGCCCTCAAGACTCACATGGCACTGCTGGGGCTGCAGAGAGTCGGC  
ATCCTCAAGTTCTGGTCAGCCAGAACGTGGACGGCCTTACGTCCGTTCCGGGATTCCCA  
CGGGACAAGTTGGCCGAGCTGCACGGGAACATGTTTGTGGAAGAGTGCCTGAAATGTGGC



AAGTACGTTGAGTCCCAAGCCCGGGGAGGGCGTCAGCGCCGTGGGGGCTTCGCTGCTCTC  
CCCGGCGAAGGCTGGAGGCCCTGCACAGGGAAGTTAAGAGACACCATTTGGACTGGGAA  
GATTCCCTGCCCCACCGCGACCTCACGCTGGCGGATGAAGCTGCAGGAAAGCTGATCTC  
TCTGTCACGCTGGGGACCTCTCTGCAGATCAAACCCAGCGGCAACCTCCCGCTGATCAG  
AAGAAGAGGGGAGGGAAGCTGGTCATAGTCAACCTACAGGCAACCAAGCACGACAGACAG  
GCTGACCTGCGCATCCACGCCTACGTTGATGACGTCATGACAAAAGCTGATGAAGCACCTG  
GGGCTGGAGGTGCCGAGTGGACGGGGCCGGTGGTGGTAGAGAGTGCCGAGCTCATCAAG  
CCTGAACAGCTCTTCAAATTTGACCTTGGGGCTCGCCGACCACTCAAAGAAGACCCCATC  
TCCCAGCACAATGGCACTACTGGGGTGCACCTGACCTTGGGACCACGCTCACAGAGCAC  
CGTGACAGTCTGAAGCAGGACTGTCCCAGCCCGACACGGGGCCAACAACGGCAAAGAAG  
ATGAAGGTGGAGTCTCTCCTCACC

>Adelie\_penguin\_SIRT6

ATGAAATCCTGTGCCCCGCGCCAGAAAGCCGGCTGGGCACACGGTCCCATCCAGCCACGG  
CGTCCCCGCGTCCCCACCTCCGTGGCTTTCCGTGCAGCTCGCCGTCCCTCGGTCTGTG  
CCGTCCGAGAGCTGGTGGCTGTGCTGGTGCAGCTGGAGTTGAGCACAGGTGGGGCGGC  
ACCGGGTTACCCCTGTCTCCCGCTGCCGCGGTGTCTGGAGCCCAGCCACTTCTCG  
GGGTATCAGCTGCCTATTTTTGACCCGCCGAGGAAGTGGAGAGGAAGGTGCGGGAGCTG  
GCGGATTTGATCAGGAGTTCCTCAATGTGGTGTTCACACGGGGGCTGGAATCAGCAC  
GCCTCGGGGATTCCCGACTTCAGGGGGCCAATGGTGTCTGGACTATGGAAGAGAAGGGG  
CTCTCCCCAAAATTTGACACCACCTTTGAGAATGCCAGGCCCTCAAGACTCACATGGCG  
CTGCTGGGGCTGCAGAGAGTCGGCATCCTGAAATTCCTGGTCAGCCAGAACGTGGACGGC  
CTTCACGTGCGTTCAGGATTCCACGGTACTGCCTCTCCCGCCTGTCTCCGGTCCCTC  
ACGTTTTCTCAGCCGCTGCCACGTGGCTGCAGTACGTGCGGGACGAGTCGTGGGCAGC  
ATGGGGCTGAAGCCAACGGGCAGGCTGTGCAGCGTCACCAAAGCCCGGGGGCTGCGGGCC  
TGCAGAGGGAAGTTAAGAGACACTATTCTGGACTGGGAAGATTCCCTGCCGACCGCGAC  
CTCAGCTGGCGGACGAAGCCTGCAGGAAAGCTGATCTCTCCGTACCCTGGGGACCTCC  
CTGCAGATCAAACCCAGTGGCAACCTCCCGCTGATCACGAAGAAGAGAGGAGGGAAGCTG  
GTCATAGTCAACCTACAAGCAACCAAACACGACAGACAGGCCGACCTGCGCATCCACGCC  
TACGTGATGATGTCATGACGAAGCTGATGAAGCACTTGGGGCTGGAGGTCCCGGAGTGG  
ACGGGGCCGGTGGTGGTGGAAAGCGCTGAGCTACCAAGCCGGAACAGCTCTTCAAATTT  
GACCCCGGGCTCGCGGGCTGCTGAAGGAGGAGCCTCTCTCGCGGCACAACGGCACCGGC  
GGGCTGTGCCCTGACCTTGGGACCACGCTGGTGGAGCGCCGTGACAGTCTGAGGCAGGAG  
GGTCCCAGCCCGGACACGGGGCCAACGACGGTGAAGAAGATGAAGGGGGAGCCTCTCCTC  
ACC

>common\_starling\_SIRT6

ATGGCGGTGAATTACGCGGCCGGGCTGTGCGCGTACTCGGACAAGGGCAAGTGCGGCCTC  
CCCAGATTTTTGACCCTCCGGAGGAGCTGGAGCGGAAGGTGCAGGAGCTGGCAGAGCTG  
ATCCGGAGCTCCTCAATGTGGTGTTCACACGGGGGACAGGATCAGCACGGCCTCGGGC  
ATCCCTGACTTCAGGGGCCCAATGGTGTCTGGACCATGGAAGAGAAAGGGCTCTCCCA  
AAATTCGACACCACCTTTGAGAACGCCAGGCCCTCAAGACTCACATGGCGCTGCTGGGG  
CTGCAGAGAGTGGGAATCCTGAAATTCCTGGTCAGCCAGAACGTGGACGGGCTGCACGTG  
CGGTCAGGATTCCCCGGGACAAGTTGGCCGAGCTCCACGGGAACATGTTTGTGGAAGAG  
TGCGTGAAATGTGGGAAGCAGTACGTGCGTGACGCCGTGCTGGGCAGCATGGGGCTCAAG  
CCCACAGGACGCTCTGCAGCGTCACCAAGGCCCGGGGGCTGCGGGCCTGCAGGGGGAAG

TTACGAGACTATTCTGGATTGGGAGGATTCCCTGCCTGACCGTGACCTGACGCTGGCA  
GATGAAGCCTGCAGGAAAGCCGATCTCTGTACCCTGGGGACCTCTCTGCAGATCAAA  
CCCAGCGGGAACCTCCCCTCATCACCAAGAAGAGAGGGGAAATTGGTCATTGTCAAT  
CTCCAGGCAACCAACACGACCGCCAGGCCGACCTGCGCATCCATGGCTACGTGGATGAG  
GTGATGACCAAGCTGATGAAGCACCTGGGGCTGGAGGTGCCCGAGTGACGGGGCCAGTG  
GTGGTGGAGAGAGCCGAGGTGGCCAAGGCCGAGCTCAGCCAGGCCGAGGAGCTGCAGGGG  
AGGCTGAAGGAGGAGCCCCTGGCCAGCACAAATGGCACCACAGCTCTGTGTCCAGGGAAG  
GCACCACGGGAGCGCCGGGATGGGCTCAAGCTGGAGTGTCCAGCCCAGACATGGGGCCA  
ACACCGGTGAAGAAGATGAAGGTGGAGCCTCTCCTCACC

>central\_bearded\_dragon\_SIRT6

ATGTCGGTGAATTACGCGGCCGGGCTGTCCCTTACTCGGACAAAGGGAAATGCGGCCTT  
CCTGAGTTCTTGACCCTCCCGAGGAGCTGGAGGAGAAAACCCGCCGGCTTGC GGACATG  
ATCCGAGAAGCGGCCAACATCGTGTTCACACGGGGGCTGGCATCAGTACGGCGTCCGGG  
ATCCCGGACTTCAGAGGCCCAAACGGCGTCTGGACCATGGAAGAACGGGGCTTGGCGCC  
AAGTTTGACACCACTTTTGAGAATGCTCGGCCGTCCAAAACCCACATGGCCCTTCTGGGG  
CTGCAGAGAGCAGGCATCCTGCAGTTCTGGTCAAGTCAAGAACGTGGACGGTCTCCATGTG  
CGATCCGGCTTCCCAGAGACAAGCTGGCGGAGTTGCACGGGAACATGTTTGTGGAGGAA  
TGCATGAAATGTGGCAAGCAGTATGTGAGGGACACTGTCGTAGGCACAATGGGGTTGAAG  
CCGACAGGGCGGCTGTGTGACGCTTCAAACGCCGAGGGCTGCGCTCCTGCAGGGGAAAG  
CTCATGGACACCATCTTAGACTGGGAAGATTCTCTGCCAGATCGGGATCTCAGCCTGGCA  
AGTGAAGCCAGCAGGAAAGCAGACCTTTCTGTACGTTGGGAACCTCCCTTCAGATCAAG  
CCCAGTGGAGATCTTCTTTGCTGACGAAGAAGAAAGGGGGAAAGCTTGTGATAGTGAAT  
TTGCAGCCCACGAAACACGACAAGCACGCAGATCTGCGCATCCATGGTTATGTCGACGAC  
ATCATGGCAAAGCTCATGAAGCACCTTGGGGTGGAGATCCCTGAGTGGGCAAAGCCTGTG  
GTGGTGGAGAAGGCCGAGCCCCTCGACCTCAAGCCTTTGGCAAACCCGGCACGAACCTT  
CAGTCCCGAGCAAGGAGGAGCCCATCCCGCACTGTAACGGCACAGGGGGGAGCACAGAT  
CTCGGGAGGTCTCCGAAGCATGGATCCAGCCATTGCGACACAAACTCCGGAATCGCCAAA  
CGGCTAAAGCGGGAATCGCCACTGACC

>Gecko\_SIRT6

ATGGCCAAGCATCGTGAGCAGGGGCTCCGGCTGGTTGGCTGCCCTCGTCCTCTTCCACT  
GTCCTGCTTCTGCTGACGCGAGTCAGTTCTTCTGCTGACGGGCAGCGAATGCCTTCGG  
GAGTCTTTCAGGGCTTGCCAGCAAGCAGTCTTTAAGTCAGTACTCTCTCTGGTGGACCC  
ATCACGGTGCACGGCCCCACGCCAGACGCAGCTCCGGCTCACGTCTTTCCGGCTCTGCC  
ACGTCGTGCCGACACGCCACCACGCCTCCGGCTGTTGGCAACCACAGTCCCAGCTTGTC  
TTCGATGTCGCTGCGGACCCGCGACAATGCGTTGCTCCCCGGGCCGGCCGGGGCAGGAG  
GAGAGCGTAGCGCCTCAGCTGACCGCTAGAGGGCAGGGCCGCGCTGCGGTCCGGCTGCCC  
CCGGCTAGGCTGCCTGGAGCCGGCCCTGCGGTGTTGCGTAACGGCGCCTGGCCGGCTTCC  
CAGCCCGCGAGCCCCGAGAGGGTGGGCCCCCTCTCCCGGAAGAGAAGGGAGGCCGAGAG  
AGGATTGATGGCCGTCAGGCGGAGGAAAGCTGTTGTTTGGAGCCACCACCAAGCCCCGG  
GGCGGTGCCAAAGGCGCCTCGTCCTCGCCGCGGGCGGGGGGCTTGTACTGCGCCGCCG  
GCCAGCGTCGCCGCTTTCTTTCCCGTGTCTTTTTGTGCTTTTGACAGACAAGCATTT  
GACAGAGGCCCAACGGCGTTTGGACCATGGAGGAGAGAGGCTTGCCCCCAAATTCGAC  
ACCACCTTCGAGAACGCGCAGCCTTCCAAGACCCACATGGCCCTCCTGGAGCTACAGAGG  
AAGGGCATCCTGCGATTCTAGTCAGCCAAAATGTGGACGGACTTACGTGCGCTCCGGG

TTCCCGAGAGATAAGCTGGCAGAGTTACATGGGAACATGTTTCGTGGAGGAATGTATGAAA  
TGTGGCAAGCAGTACATACGAGACACCGTGGTGGGGACGATGGGTCTGAAGCCGACGGGT  
CGGCTATGTGACGTTTTCCAAACGCAGAGGGCTTCGGTCTGCAGAGGAAAATAATGGAC  
ACCATTTTGGACTGGGAAGACTCTCTACCTGATCGGGATCTCAGTCTGGCTAGCGAGGCC  
TGCAGAAAAGCCGACTTGTCCGTACCTTGGGAACATCCCTGCAGATCAAACCCAGCGGC  
GACCTCCCTCTGCTGACGAAGAAGAAAGGGGGCAAGCTGGTGATCGTCAACCTGCAGCCA  
ACCAAGCACGACAAGCACGCTGACCTGCGGATTCATGGTTATGTGGACGAGGTCATGACG  
AAGCTGATGAAGCACCTGGAACCTGGAGATTCCTGAGTGGACGGGGCCACGTGTGGTAGAG  
GAGAGCGCTGAGATCCCAGAGTCCAAACCGCGGGCAAACCAAGCACAGACTTTAAGTTC  
CTGAGTAAAGAGGAGCCCTTTTACTACTGCAACGGCACAGAGGAGAGCCCAAGCTGCA  
CGCCAGGAGCACAGTGTCTCTGAAGCATGAATCTGCCACTGGACAGCAACCCGAAC  
GCAGCCAAACGCACTAAAACGGAACCACCGCCCACT

>Taiwan\_habu\_SIRT6

ATGTCCGTCAATTACGCGGCGGGTGTGCGCCTACCCGGACAAGGGGAAGTGCGGCCTC  
CCGGAGATTTTTGATTCGCCGACGAGTTGGAGAGGAAGATCCACCAGTTGGCTGACTTG  
ATCCAGAATCTTTAGTGTGGTGTTCACACCGGGGCGGGAATCAGCACAGCCTCAGGG  
ATTCCGATTCAGGGGCCGAATGGGGTGTGGACCATGGAGGAGCGGGCCTGGTCCCC  
AGATTCGACACGACCTTTGAGAACGCGAGGCCATCGAAGACGCACATGGCCCTGCTGGAG  
CTGCACCGCGTGGGCATCCTGCACTTCTGGTCAGCCAAAACATCGACGGGCTTCACGTG  
AGGTCCGGCTTCCCCAGGGACAAGCTGGCAGAAGTGCATGGGAACATGTTTCGTAGAGGAA  
TGCGTGAAATGTGGCAAGCAGTACGTGAGGGACACCGTGGTGGGCACCATGGGGCTGAAG  
CCCCTGGCCGGCTCTGCGACGCCTCAAGCACCGAGGGCTCCGATCCTGCAGAGGCAAG  
TTAATGGACACCATCTAGACTGGGAAGATTCCCTGCCGGACCGTGACCTGAATTGGGCC  
TCTGAAGCCAGCAGGAGGGCGTCTTATCCATCACCTGGGGACCTCCCTGCAGATCAAG  
CCCAGCGGGACCTTCCGCTGCTGACCAAGAAGAAGGGCGGGAAGCTGGTGATCGTCAAC  
CTGCAGCCACAAAGCACGACAGGCACGCGGACCTGCGCATCCACGGCTACGTGGACGAG  
GTGATGACGAAGCTGATGAAACTCCTCGGGCTGGAGATCCCCGAGTGGGCTGGGCCGCTG  
GTGGTGGAGCGTGCAAGACAGCGAGAGGCCAAGCCGCTCTCCAAACCGGCGCAGACTTG  
CCCTTCTGAGCAAGGGAGAGCCGGCTCCCTGCTGGAACGGTGGCCGGGAGGGCCTGGGA  
CACACGGCGGTCTGAAGCAGGAATCCCGCTGCTGGACGGCGGCTCCGTCCCGGCCAAG  
CAGCCGAAGCTGGAGCCGTTGCCCACT

>green\_sea\_turtle\_SIRT6

ATGGAGGAGAGGGGATTGTCCCCAAGTTTGACACTACCTTTGAGAATGCAAGGCCTTCC  
AAGACCCATATGGCACTGCTGGAGCTGCAGAGAGTCGGCATCTTGAAGTTCCTGGTCAGC  
CAAACCTGGATGGCCTGCATGTGCGTTCTGGATTCCACGGGACAAGCTGGCCGAGCTG  
CACGGGAACATGTTTGTGGAAGAATGTGTGAAATGCAGCAAGCAGTACGTGCGGGATGCT  
GTCGTGGGCACCATGGGCCTCAAGCCGACCGGCAGGCTGTGCGACGTCTCAAAGCAAGA  
GGGCTTCGTGCTGCCGAGGAAAGTTAATAGACTGTTTTAGACTGGGAAGATTCTCTG  
CCTGATCGGGACCTGAGTCTAGCAGACGACGCTGCAGGAAAGCTGACCTGTCAGTCACT  
CTGGGGACCTCTTTCAGATCAAACCCAGTGGCAATCTCCCCTGCTCACGAAAAGGAAA  
GGAGGGAAGCTGGTCATAGTAAATCTGCAAGCAACGAAGCATGACCGCAAGCCGACCTG  
CGCATCCATGGCTACGTGGATGAAGTCATGACAAGGCTGATGAAGCAGCTTGGTCTGGAG  
ATCCCCGAGTGGACGGGGCCGATGGTGGTGGAGAGTTCTGAGCTTGTGAAGCCCGAACCA  
GCCCTAAAACCTCGATCCGGATGCTCAGCGCCAGCCAAGGAAGAGCCCTGCTCCCACCAC

AATGGCACGGCAGAGGGGGCTGATGGGACATGCCCCGGGGCTCGGCACGGCAGCGAGGAG  
CACGGTGACCGTCTGAAACAGGAAAGTCTGGCTCAGGCCGACCCCCGTAGCAGCCAAG  
AGAGTGAGAGTGGAGTCGCTGCTCACC

>Chinese\_alligator\_SIRT6

ATGGGAAGCGACTGCCTCAAGGTCACTTGGATGATCTTTGATCCTCCGGAGGAGCTGGAG  
AGGAAAGTGCCTGAGCTGGCCGACCTGATCAGGAGCTCTTCCAACGTGGTGTTCACACC  
GGGGCTGGGATCAGCACAGCCGACGGGATCCCCGACTTCAAGGGGGCCAATGGCGTCTGG  
ACCATGGAGGAAAAGGGTGTCCCCCAAGTTTCGACACCACCTTTGAGAATGCCAAGCCC  
TCCAAGACACACATGGCACTGCTGGAGCTGCAGAGAGCTGGCATCCTGAAGTTCCTGGTC  
AGCCAGAACGTGGACGGGCTGCATGTCCGCTCTGGATTCCCACGGGACAAGCTGTCCGAG  
CTGCACGGGAACATGTTTGTGGAGGAATGTGTGAAATGCGGCAAGCAGTACGTGCGGGAC  
ACCGTGGTGGGAGCATGGCCTCAAGTCGACAGGCAGGCTGTGCAACGTCACTAAAGCG  
CGTGGTCTCCGTGCCTGCAGGGGGCAAGCTCATAGACACTATTCTGGACTGGGAGGATTCG  
CTACCTGGCCGGGACCTCAGCCTGGCCGATGAAGCCTGCAGGAAAGCAGACCTGTGCATC  
ACTCTGGGAACCTCTCTCCAGATCAAACCCAGTGGCAATCTCCCCCTGATCACGAAAAG  
AGAGGTGGGAAGCTGGTATTGTCAATCTCCAAGCAACCAAACACGACAGACAAGCCGAC  
CTGCGCATCCATGGCTATGTGGATGAAGTCATGATGAAGCTGATGAAGCACCTGGGTCTG  
GAGATCCCTGAGTGGAGAGGGCCAGTGGTAGTGGAGAGGGCAGAGCTGGTGAAGCCCGAA  
GAGCCCCTCAAGCCCGACCCTGATGCTCTTTGTCCAGCCAAAGCTGAGTCCCCTTCCCAC  
CACAACGGCATCATGGAGGGGGCCAGCGGGACCTGCCCTGGCCTGGGGCTCGTGCCCAAG  
TCTCGCTGTGACAGTGTGAAACAGGAATGTCCAGCCCTGTAGCAGCCAAGAGGAGGAAA  
GCAGAGTCACTGCTCACC

>Gharial\_SIRT6

ATGTCCGTGAATTACGCGGCCGGGCTGTCCCCTACTCGGACAAGGGCAAGTGTCTTTC  
CTTCAGATCTTTGATCCTCCGGAGGAGCTGGAGAGGAAAGTGCATGAGCTAGCCGACCTG  
ATAAGGTGTTCTTCCAACGTGGTGTTCACACGGGGGCTGGGATCAGCACAGCCGACGGG  
ATCCCCGACTTCAAGGGGGCCAATGGCGTCTGGACCATGGAGGAAAAGGGGTTGTCCCC  
AAGTTTGACACCACCTTTGAGAATGCCAAGCCCTCCAAGACCCACATGGCGCTGCTGGAG  
CTGCAGAGAGCCGGCATCCTGAAGTTCCTGGTCAGCCAGAATGTGGACGGTCTGCACGTC  
CGCTCTGGATCCCACGGGACAAGCTGGCCGAGCTGCACGGGAACATGTTTGTGGAGGAA  
TGTGTGAAATGCGGCAAGCAGTACGTGCGGGACACCGTGGTGGGAGCATGGGCCTCAAG  
TCGACAGGCAGGCTGTGCAACGTCACTAAAGCGCGTGGTCTCCGTGCCTGTAGGGGCAAG  
CTCATAGACACTATTCTGGACTGGGAAGATTGCTACCTGACCGGGACCTCAGCCTGGCC  
GATGAAGCCTGCAGGAAAGCGGACCTGTGCATCACTCTGGGAACCTCTTTCAGATCAAA  
CCCAGTGGCAATCTCCCCTGATCACGAAAAGAGAGGTGGGAAGCTGGTATTGTCAAT  
CTCCAAGCAACTAAACACGACAGACAAGCCGACCTGCGCATCCATGGTTATGTGGATGAA  
GTCATGATGAAGCTGATGAAGCACCTGGGTCTGGAGATCCCTGAGTGGAGAGGGCCAGTG  
GTGGTGGAGAGGGCAGAGCTGGTGAAGCCGAAGAGCCCTCAAGCCTGACCTGATGCT  
CTTTGTCCAGCCAAGGCTGAATCCCCTTCCCACCACAACGGCATCATGGAGGGGGCCAGC  
GGGACCTGCCCTGGCCTGGGGCTCGTGCCCAAGTCTCGCTGTGACAGTGTGAAAACAGGAA  
TGTCCAGCCCTGTAGCAGCCAAGAGAAGAAAAGCAGAATCACTGCTCACC

>African\_clawed\_frog\_SIRT6

ATGTCCGTGAATATGCGGCCGGTTTGTCTCCGTATGCCGATAAAGGTGCTGCGGGCTC  
CCGGAGCAATTTGATTCCCCGGACGAATTGCGTCAGAAAGTAGAGGAACTAGCTGAAATG

ATACGTGAATCCTCCTACGTTGTTTTTACACGGGAGCCGGGATCAGTACTTCTGCGGA  
ATCCCAGACTTCAGGGGGCCTAATGGAGTGTGGACTCTGGAGGAGAAAGGGCTGGACCCA  
AAGTTTGACACCACCTTTGAAACCGCATGTCCTTCCCCTACTCACATGGCGCTGCTGAAG  
CTGCAGAGGGTTGGGATCCTGAAGTTTCTGGTTAGTCAAATGTAGATGGTCTGCACGTA  
AGATCCGGCTTCCCCGGGAGCAGCTGGCGGAACTGCATGGGAACATGTTCTGAGGAA  
TGTAGCAAATGTGCTAAACAGTATGTGCGGGATCAAGTGGTGGGAACCATGGGGCTCAA  
CCTACCGGCAGTTTTGTGATGTGCCAAAGGTGCGAGGCTGCGAGCTTGCAGGGGGAAA  
CTGAAAGACACCATCCTGGATTGGGAAGACTCCCTGCCTGACAGAGACCTAAACCTGGCT  
GATGAAGCCTGCAGGAAAGCAGACCTGTCCATTACTTTGGGGACCTCACTCCAGATCCGA  
CCCAGTGGGAACCTTCCGCTCCTACCAAGCGCAAGGGAGGGAACTAGTCATTGTA AAC  
CTTCAGCCCACCAAGCATGACAAACATGCGGATTTGAGAATACATGGTTATGTGGATGAG  
GTGATGATACAGCTCATGGAGCTTCTGGGTACAAGATACCAGTTTGGACTGGGATACAT  
ACTAAACAGAGCCAACCTTATGAGAACATAAGGAGGAAGATAACTCCTACCATAATTCA  
GTGCTGGATGCTAACCTGGACAAAAGAGGGAAGGGTGCAAGGAAGAATCTAATCTTGAG  
CTAAAGAAGGCAAAAGTTGAACCAGCATGTGTA

>Tibetan\_frog\_SIRT6

ATGTCGGTGAATTATGCAGCTGGTCTGTCCCAATATCCTGATAAAGGGAAATGCGGACTT  
CCTGAGGTTTTGTATCCACCGCGAGAATTGCATCGGAAGGTGCAGAAGCTTGCTGAAATG  
ATCCGAAAAGCCTTATGTGGTATTTCACTGGAGCAGGAATCAGCACTTCTTGTTGGG  
ATCCCTGATTTTAGGGGCCCTAAAGGTGTGTGGACATTGGAGGAGAAAGGTCTAAATCCA  
AATTTTGATAACAATTTGAAAATGCTCGTCCGTCTATAACGCATATGCACTTCTACAA  
CTGCAGAGAGTTGGTATCTTGAAGTTTTTGATCAGCCAAAATGTGGATGGTTTGCATTTA  
AGGTCTGGATTTCCAGGGAAGAGCTTGCAGAGCTCCACGGCAACATGTTTGTGAGGAG  
TGCACCAAATGTGGCAAGCAGTATGTTTCGAGACTGTGTGGTGGGAACCATGGGATTA  
CCTACTGGAAGACTTTGTGATGTTTCAAAGTTAGAGGTCTACGGTCATGCAGAGGAAAG  
CTGATCGATACTATTCTGGATTGGGAGGATTCTTGCCTGATAGAGACTTGAACCTAGCT  
GATGAAGCCTGCAGAAAAGCAGATTTGGCGATAACACTTGGAAACATCACTTCAAATTA  
CCTAGTGGGAATCTTCTTGTAAACCAAGCGTAAAGGTGGCAAGTTAGTCATAGTAAAC  
CTTCAGCCAACCAACATGACCGGCATGCTGACTTGTGCATCCATGGTTATGTCGATGAG  
GTTATGACACAGCTCATGCAACATCTAGATATTAATAATCCCATATGGACTGGCATATCT  
GTTAAATAGAATCAAGCGAGCACAATCTTAAATCCGAAGTGGTGTCAAACCTGTAATGGA  
GACCTGGGTTCTTTAGAGTGCCAAAAGAGCAAGAGGGAATGTTGTGTTGAGGAGGTTTCC  
AGTCTGCCGAAGCGAGCAAAAGTTGAAACGCCTTGTGTA

>southern\_platyfish\_SIRT6

ATGTCAGTGAATTATGCTGCTGGACTCTCTCCGTACGCAGATAAAGGTGTCTGCGGACTG  
CCTGAGAGTTTCGACAGTTCTGAGGAACTAAAGGCAAAAGTGGAGACCCTTGCTCAGCTG  
ATTAAGAATCGGAGTACTTGGTCCACTCTGGAGCTGGAATTAGCACCTCATCAGGC  
ATTCCTGACTTCAGAGGTCCCAAGGGTGTGTGGACGCTAGAAGAAAAGGGTGTGACCT  
CACTTTAATACCACATTTGAAGATGCCCGCCCCAGTTTGACTCACCTGGCCCTCCTGGGA  
CTGCAAAGGGCAGGATACCTGAAATACCTCATCAGCCAGAATGTCGACGGGCTGCATGTT  
CGATCAGGCTTCCCAGGGATAAACTATCAGAGCTTCATGGAAACATGTTTGTGGAGGAA  
TGCGAGAAGTGTGGCAGGCAGTACGTGAGGGAAAAGGTGATCGGTGTGATGGGGCTGAAA  
CCGACAGGACGTTACTGCGAGGTGGTGCAGGCTCAGAGGGCTGAGGGCCTGCAGAGGAAAG  
CTGATCAGCACCATACTGGATTGGGAGGATGCTCTGCCTGACAGAGACCTGAACAGGGCA

GATGATGCAAGCAGACGAGCAGACCTGGCACTGACTCTGGGCACGTCCATGCAGATCAAA  
CCCAGTGGGGACCTCCCCTCCTCACAAAGCGCAAAGGAGGGAAAGTGGTTATAGTCAAC  
TTGCAACCAACCAACATGACAAAACGCCCCACTGCGTATCAACGGTTATGTGGACGAT  
GTCATGAAGCAGCTGATGGAGCTGCTGGATTTAGAAATCCCAAATGGGAGGGACCCGTC  
ATCTGCGAGAGCTCCACTTTCTCACCCGAGACCACCGCTGATGTCAAGCCTCCTCGCGGC  
ATGTCTGCAAAGGACAAAGTAAAAAGGACAAAATCAAGGAGGAAAGGAAAAGGGAAGCA  
ACGCAGCCAACGGAGGACGCCGGCGTGAAAGACGAGACGGTTTCAGTAAAGCGAGAGCGA  
GCAGATTTTTCCGCGGAGACAGACGAAAAGGAA

>American\_alligator\_SIRT6

ATGTCCGGTGAATTACGCGGCCGGGCTGTCCCCCTACTCGGACAAGGGCAAGTGCGGCCTC  
CCCAGATCTTTGATCCTCCGAGGAGCTGGAGAGGAAAGTGCATGAGCTGGCCGACCTG  
ATAAGGAGTTCTTCAACGTGGTGTTCACACTGGGGCCGGGATCAGCACAGCCGTAGGG  
ATCCCCGACTTCAGGGGGCCCAATGGCGTCTGGACCATGGAGGAAAAGGGGTTGTCCCC  
AAGTTCGACACCACCTTTGAGAATGCCAGGCCCTCAAGACCCACATGGCACTGCTGGAG  
CTGCAGAGAGTCGGCATCCTGAAGTTCCTGGTCAGCCAGAACGTGGACGGGCTGCACGTC  
CGCTCTGGATCCCACGGGACAAGCTGTCCGAGCTGCACGGGAACATGTTTGTGGAGGAA  
TGTGTGAAATGCGGCAAGCAGTACGTGCGGGACACCGTGGTGGGGAGCATGGGCCTCAAG  
TCAACAGGCAGGCTGTGCAACGTCACTAAAGCACGTGGTCTCCGTGCCTGCAGGGGCAAG  
CTCATAGACACTATTCTGGACTGGGAGGATTGCTACCTGGCCGGGACCTCAGCCTGGCC  
GATGAAGCCTGCAGGAAAGCAGACCTGTGATCACTCTGGGAACCTCTCTCCAGATCAAA  
CCCAGTGGCAATCTCCCCCTGATCACGAAAAGAGAGGTGGGAAGCTGGTGATTGTCAAT  
CTCAAGCAACCAACACGACAGACAAGCCGACCTGCGCATCCATGGCTATGTGGATGAA  
GTCATGATGAAGCTGATGAAGCACCTGGGTCTGGAGATCCCTGAGTGGAGAGGGCCAGTG  
GTGGTGGAGAGGGCAGAGCTGGTGAAGCCCAGGAGCCCTCAAGCCTGACCCTGATGCT  
CTTTGTCCAGCCAAAGCTGAGTCTTCCCATCACAAACGGCATCATGGAGGGGGTCAGC  
GGGACCTGCCCTGGCCTGGGGCTCGTGCCCAAGTCTCACTGTGACAGTGTGAAACAGGAA  
TGTCCCAGCCCTGTAGCAGCCAAGAGGAGGAAAGCAGAGTCGCTGCTCACC

>Armadillo\_SIRT6

ATGCATTTAAGGAGTGCCAGGTGGCAGGACTCCCTCCCGAAGCCCCACCCTCCCTGCT  
GCTTTTCAGTCATCTTGTCCGCCAGCATTTATTGAGTGCCTGCTGTGTGCCAGGGACTTT  
ATCTTTGACCCCCGGAGGAGCTGGAGCAGAAGGTGCGGGAGCTGGCGCAGCTGGTGTGG  
CGGGCGTCATACGTGGTTTTCCACACGGGGGCTGGCATCAGCACCGCCTCGGGCATCCCC  
GACTTCAGGGGGCCCGCACGGCGTGTGGACCATGGAGGAGCGCGGCCTGGCGCCCAAGTTT  
GACACCACGTTTCGAGAACGCGCGGCCACGCGGACGCACATGGCGCTGGTGCAGCTGGAG  
CGCGTGGCCTGCTGCACTTCTGGTCAAGCAGAACGTGGACGGGCTGCACGTGCGCTCT  
GGCTTCCCAGGGACAAGCTGGCAGAGCTCCATGGAAACATGTTTCATAGAAGAATGTGTC  
AAGTGTAAGACCCAGTACGTCCGGGACACCGTCTGGGACAGCATGGGACTCAAGCCACG  
GGACGTCTCTGCACCGTCGCCAAGGCCCGGGCCTGCGGGCCTGCAGGGGCGAGCTGAGG  
GACACCATCCTGGACTGGGAGGACGCTCTGCCCGCCGGGACCTCGCCCTGCCGACGAG  
GCCAGCAGGTGGGGTGGCCAGCCCCGCCCAGCCCCACCCTGCCGCGCCAGGGTGGG  
GGGGCCAGGGATGCCAGCTGGACATGCTCGGCGGGCGGGCCTCAGTTTCCCCGTCC

>Chicken\_SIRT6

ATGGCGGTGAATTACGCGGCCGGGCTCTCGCCCTACTCGGATAAGGGCAAGTGCGGCCTC  
CCCAGATTTTCGATCCACCTGAAGAGCTGGAGAGGAAAGGTGTGTGAGCTGGCAGACTTG

ATAAGGAGCTCTCCAATGTGGTGTCCATACAGGGGCTGGCATCAGCACCGCCTCGGGG  
ATTCCTGACTTCAGGGGGCCTAATGGTGTCTGGACTATGGAAGAGAAGGGGCTTTCCCC  
AAATTTGACACCACCTTTGAGAACGCCAGGCCCTCCAAGACTCACATGGCACTTCTGGGG  
CTGCAGAGAGTTGGCATCTGAAATCTCTGGTCAGCCAGAACGTGGATGGCCTTCATGTG  
CGCTCAGGATTCCCACGGGACAAGTTGGCTGAGCTCCACGGGAACATGTTTGTGGAGGAG  
TGCATGAAATGTGGCAAGCAGTACGTGCGGGATGCTGTTGTGGGCAGCATGGGGTTGAAG  
CCAACGGGCAGGCTGTGCAGCGTCACCAAAGCACGAGGGCTACGGGCCTGCAGAGGGAAG  
CTAAGAGACACTATTCTGGACTGGGAAGATTCCCTGCCTGACCGTGACCTCACACTAGCA  
GATGAAGCCTGCAGGAAAGCTGATCTCTCTGTTACTGGGAACCTCTCTGCAGATCAAA  
CCCAGTGGCAACCTCCCACTGATCACAAGAAGAGAGGAGGGGAAGCTGGTCATAGTCAAC  
CTACAAGCAACCAAGCACGACAGACAGGCCGACCTGCGCATTGCTTACGTGATGAT  
GTCATGACAAAAGTGTGAAGCACCTGGGGCTGGAAGTCCCAGAGTGGACAGGGCCAGTG  
GTGGTGGAAAGTGTGACTCTGCCAAGCCTGAACAGCTCTACACATTTAAGCCCGAGGCT  
CACGGGTTGCTCAAGGAGGAGCCCTTTCCAGCACAATGGAACAGCTGGGCAGTGCCCC  
GACCTTGGGACCACGCTGGTGGAGCACCGTGACAGTCTGAAGCAGGAGTGTCCAGTCCA  
GACACAGGACCACCACTGACAAAGAAGATGAAGGTAGAGCCTCTCCTCACC

>Chinese\_softshell\_turtle\_SIRT6

ATGGCGCCGGGCGGCGCGCCCTCCGAGTTCTGCGCATGCGGACTGAGGGGCGGCGGCTT  
CAGTCGCTTTGTGGCTTCGGTGAAACTGCTTATCCACCATTCCGCGTGCTGGGCTGGCGG  
GACGCTTATCCCTGCTTCTCCATTTCAATTTTCCCTCCCTCAGATTTTGGACCCGCCA  
GAGGAGCTGGAGAGGAAAGTGTGTGCCTTAGCAGACTTGATCAGGGGCTCTTCCAATGTA  
GTATTTACACAGGAGCCGGGATCAGCACAGCCTCAGGAATCCCTGATTTAGGGGGCCC  
AATGGCGTATGGACTATGGAAGAGAGGGGATTGTCCCCAAGTTTGACACTACCTTTGAG  
AATGCGAGGCCACCAAGACACACATGGCGCTGCTGGAGCTGCAGAGAGTCGGCATCTTG  
AAGTTCCTGGTCAGCCAGAACGTGGATGGCCTGCATGTGCGTTCCGGATTCCCACGGGAC  
AAGCTGGCCGAGCTGCACGGGAACATGTTTGTGGAGGAATGTGTGAAATGCGGCAAGCAG  
TATGTGCGGGACACCATTGTGGGCAGCATGGGCCCTCAAGCCAACAGGCAGGCTGTGTGAT  
GTCTCAAAGCTAGAGGGCTTCGTGCCTGCCGAGGAAAGTTAATCGACACTATTTGGAC  
TGGAAGATTCCCTGCCTGATCGGGACCTCAGCTTGGCAGATGAAGCCTGCAGGAAAGCC  
GACCTGTGAGTCACGCTGGGGACCTCTCTCAGATCAAACCGAGTGGCAACCTCCCCCTG  
CTCACGAAAAGGAAAGGAGGGGAAGCTGGTATCGTGAATCTGCAAGCAACGAAGCACGAC  
AGGCAAGCCGACCTGCGCATCCATGGCTACGTGGACGAAGTCATGACAAAGCTGATGAAG  
CAGCTCGGTCTGGAGATCCCCGAGTGGACGGGGCCGGCGGTGGTGGAGAGTTCTGCGCTT  
GTGAAGCCCGAACCACCCCTAAAAGTACGCCAGAGGCTCCGCGCCCGCCAAGGAAGAG  
CCCTGCTCCCACCAACCGGCACGACGGAGGAGGCCGACGGGGCTTGCCCGAGCGCGGG  
CCCTCACGCAAGGAGCACTGGGACAGTCTGAAACAGGAGTGTCTGGCTCAGACCGCGGT  
CCCGTAGCAGCCAAGAGGGTGAAAGTGGAGTCGCTGCTCTCT

>Cod\_SIRT6

ATGTCTGTGAACTACGCGGCAGGGCTCTCGCCTTACGCGGACAAAGGTGTCTGCGGACTA  
CCCAGAAAGAAATTTGACAGTCCGGAAGAGCTGACAGGCAAGGTTAAAATCCTGACAGAG  
ATGATAAAGAAGTGCAGTTCCTCGTAGTGCCTCTGGAGCAGGCATCAGCACCGCCTCG  
GGTATCCCAGACTTCAGAGGGCCAAAGGGCGTGTGGACCATGGAGGAGAAGGGCGAGACG  
CCTAAGTTCGATAACCGTTCGAGGACGCGCGGCCAGCCTGACGCACATGGCCCTCCTT  
GGCCTCTACAAGGCCGGCATCCTTAAGTACCTCGTCAGCCAGAACGTGGACGGGCTGCAC

GTGAGATCCGGCTTCCCCAGGGATTCTTGTCTGGAGCTTACGGAAACATGTTTGTGAA  
GACTGTGAGAAATGTGGCAGGCAGTATGTGAGGGAGAAGGTGATCGGTGTGATGGGCCTG  
AAGCCGACCGGGCGTACTGTGACGTGGTCCGCTCCAGGGGTCTCCGTGCCTGCCGGGGG  
AAGCTGATCAGCACCATACTGGACTGGGAAGAGGCCCTTCCATCAAAGACCTGACCAGA  
GCTGAGGCCGCCAGCAGACAAGCGGATCTGGCCTTGACGCTGGGCACCTCCCTGCAGATC  
AAGCCCAGCGGAGACCTGCCACTCCTACCAAGAAGAAGGGCGGCCAGCTGGCGGTGGTC  
AACCTGCAGGCCACCAAACACGATAAGCACGCTAACCTCCGTATCCATGGCTACGTCGAC  
GAGGTCATGAAACAGCTGATGGAGGCCCTGGGATTGGACATTCCGAAGTGGGAGGGGGCCG  
ACGGTCTGCGAGAGCTTCGGTGCCAAACCCGAACCACCAGGCCATCTTGCAGCACCAGAG  
GTGGAGGAAGAGGTGAAGAAGGAGGGGAAGAAGAAGGGGCAGAGGAAGCGACCCCCGGCG  
CCGCTACGAACGGGGAGGTAGACGAAGAGGCCGCTTTGGTGAAGAAGGAGAGAGCCGAA  
TCTCCA

>Cow\_SIRT6

ATGCAGACAAGGGCAAGTGCGGTCTACCCGAGGTCTTCGACCCCCCGAGGAGTTGGAGC  
AGAAGGTGTGGGAGCTGGCACAGCTCATCTGGCAGTCCTCCAGTGTGGTGTTCACACAG  
GCGCAGGCATCAGCACTGCCTCAGGCATCCCCGACTTCAGGGGCCCCCATGGCGTCTGGA  
CGATGGAGGAGCGGGCCTGGCCCCACGTTTCGACACCACCTTCGAGAACGCCAGCCCA  
CAAAGACCCACATGGCGCTGGTCCAGCTGGAGCGTGTGGGCCTCCTGCACTTCTGGTCA  
GCCAGAACGTGGACGGACTGCACAGACAAGCTGGCAGAGCTCCACGGAAACATGTTTATA  
GAAGAATGTGTCAAGTGTAAAGATGCAGTATGTCCGGGACACCGTGGTGGGCAGCATGGGC  
CTGAAACCCACGGGCCGGCTCTGCACCGTGGCCAAGTCCAGGGGGCTGCGGGCCTGCAGG  
GGGAGCTGAGAGATACCATCCTGGATTGGGAGGATTCCCTGCCTGACCGGGACCTCACC  
TTGGCCGACGAAGCCAGCAGGAATGCAGACCTGTCCATCACACTGGGCACCTCCCTGCAA  
ATCCGGCCCAGCGGGAACCTTCCCCTCGCCACCAAGCGACGTGGAGGTCGCTGGTTCATC  
GTCAACCTTCAGCCCACCAAGCACGACCGCCACGCAGACCTGCGAATCCACGGTTATGTT  
GATGAGGTTCATGACGCGGCTCATGAAACACCTGGGCCTGGAGATCCCGGCCTGGGACGGC  
CCCCACATGGTGGAGAGGGCACTGCCGCCCTGCCACGCCACCTGCCCCAAGCTGGAG  
CCCAAGGAGGAGGCTCCCCCAGCTCAACAGCCCAGTGCCTGCCAACCCCAAGCAGGAA  
CCCACAGCTGAGCCCTGCACCCAGCACAATGGTTCTGGACCCACCAGCCCCAAAAGGGAG  
CGGCCGGACAGCCCTTCCCCTCACAGGCCTCCAAAAGAGTGAAAACCGAGGTGGTGCCT  
AGC

>Dog\_SIRT6

ATGGAGGAGCGGGCCTGGCCCCAAATTCGACACCACCTTTGAGAGCGCGCGGCCACG  
CAGACCCACATGGCACTGGTGCAGCTGGAGCGCGTGGGCCTCCTCCGTTCTCTGGTCAGC  
CAGAATGTGGATGGGCTGCATGTGCGCTCCGGTTTTCCCAGGGACAAGCTGGCGGAGCTC  
CACGGAACATGTTTCGTAGAGGAATGTGTCAAGTGTAAAGACGCAGTACGTCCGGGACACC  
GTAGTGGGCAGCATGGGCCTCAGGGCCACAGGCCGGCTCTGCACTGTGGCCAAAGCGAGG  
GGGCTGCGGGCCTGCAGGGGGGAGCTGAGGGATACCATCCTGGACTGGGAGGACGCCCTG  
CCTGACCGGGACCTCACTCTTGCCGACGAGGCCAGCAGGAACGCAGACCTGTCCATCACG  
CTGGGCACCTCCCTGCAAATCCGGCCCAGCGGGAACCTGCCACTCGCCACTAAGCGCCGA  
GGAGGCCGACTGGTCATTGTCAACCTTCAGCCCAAAGCACGACCGCCATGCCGACCTG  
CGCATCCACGGCTATGTGGATGAGGTCATGACCAGGCTTATGAAGCACCTGGGCCTGGAG  
ATCCCTGCCTGGGACGGTCCCCGCGTGTGGAGAGAGCGCTGCCACCCCTGCCCCGCCA  
CCCCAAAGCCCCCGAGCCCCAGCCAAAGGAGGAGGCGCCCGCCAGCTCAATGGCCCA



GCACCCGCCAGTCCCAAGCAGGAGCCCTCCACAGAGCCCTGCACCCAGCACAATGGCTCT  
GGGCCCCGAGCCCCAAGAGGGAGCGGCTGGACAGTCTGTACCACACAGGCCCCCAAA  
AGGGTGAAGGCCGAGGTGGCCCCCAGC

>Dolphin\_SIRT6

ATGTCGGTGAATTATGCGGCGGGGCTGTCGCCGTACGCGGACAAGGGCAAGTGCGGTCTC  
CCCGAGGTCTTTGACCCCCCTGAGGAGTTGGAGCGGAAGGTATGGGAGCTGGCACAGCTG  
GTCTGGCAGTCTCCAACGTGGTGTTCACACGCGGCGGGCATCAGCACAGCCTCAGGC  
ATCCCCGACTTCAGTCCGTGCGCATGGAGGGAAGGGCCCCCATGGCGTCTGGACGATG  
GAGGAGCAGGGCCTGGCCCCAAGTTCGACACCACCTTCGAGAACGCGCGGCCACGAAG  
ACTCACATGGCACTGGTGCAGCTGGAGCGCGTGGGCCTCCTGCGTTCTGGTCAGCCAG  
AACGTGGACGGGCTGCACGTGCGCTCTGGCTTCCCCAGGGACAAGCTGGCAGAGCTTCAC  
GGAAACATGTTTGTAGAAGAATGTGTCAAGTGAAGATGCAGTACGTCCGGGACACCGTC  
GTGGGCAGCATGGGCCTGAAGGCCACCGCCGGCTCTGCACCGTGGCCAAGTCAAGGGGG  
CTGCGGGCCTGCAGGGGGGAGCTGAGAGACACTATCCTGGACTGGGAAGACTCCCTGCCT  
GACCGGGACCTCACTCTGGCCGATGAGGCCAGCAGGAACGCGGACCTGTCCATCACGCTG  
GGCACCTCCCTGCAANTCCGGCCAGCGGGAACCTGCCCTCGCCACCAAACGCCACGGA  
GGCGGGTGGTTCATCGTCAACCTCAGCCACCAAGCACGACCGTCACGCAGACCTGCGT  
ATCCACGGCTATGTAGATGAAGTCATGACCCGTCTCATGAAGCATCTGGGCCTGGAGATC  
CCGGCCTGGGACGGCCCCCGGTGCTGGAGAGGGCGCTGCCACCCCTGCCCCGCCACCC  
ACCCCCAAGCTGGAGCCAAGGAGGAGGCCCTGCCAGCTCCACAGCCAGCGCCCCGCC  
AGCCCCAAGCAGGAGCCCGAGCTGAGCCGGCGCCAGCATGACGGCTCCGGGCCCGCC  
AGCCCCAAAAGGGAGCGGCTGGACAGTCTGCTCCCCACAGGCCCCCAAAAGAGTGAAG  
ACCGAGGTGGTTCCAGC

>Duck\_SIRT6

ATGGCCCCAGGACTCCCTCTGCCAGTGCCACCATCCTGCTGGCGCGCAGCGCGGAGCTC  
CTGGCTGTGTCTCTCCATTCCCTGGTGGTTTCTTCTCAGATCTTTGACCCGCCGGAG  
GAGGTGGAGAGGAAGGTGCGTGAGCTGGCGGATTTGATCAGGAGCTCCTCAACGTGGTG  
TTCCACACCGGGGCGGGATCAGCACCGCCTCGGGGATCCCCGACTTCAGGGGGCCCAAT  
GGCGTCTGGACTATGGAAGAGAAGGGGCTCTCCCCAAGTTCGACACCACCTTCGAGAAC  
GCCAGGCCCTCCAAGACTCACATGGCGTCTGTTGGGCTGCAGAGGGTCCGGCATCCTGAAA  
TTCCTGGTCAGCCAAAATGTGGACGGCTTACGTGCGGTGCGGATTCCCACGGTACTAC  
CCCCTCCTCCCTGCCTCCAGGTCCCTCGTGCCTGTCCCCTCTGCGTTCGGTTCGTGCTTA  
GCACAGCCTCACGTGCAAACGTTTGCAGACAGAAAGCAACAGTTTAAGGGTAACCCCGGT  
CCCCGTGTGTCTTCTAGAGGGAAGCTACGAGACACGATTCTGGACTGGGAGGATTCCCTT  
CCCCACCGTGACCTCACGCTGGCGGACGAAGCCTGCAGGAAAGCCGACCTCTCTGTCAG  
CTGGGGACCTCCCTGCAGATCAAACCCAGCGGCAACCTCCCGCTGATCACGAAGAAGAGA  
GGAGGGAAGCTCGTCATCGTCAACCTGCAAGCCACCAAGCACGACAAACAGGCCGACCTG  
CGCATCCACGCCTACGTGACGATGTCATGACCAAGCTGATGAAGCACCTGGGGCTGGAG  
GTCCCCTCTTCAAATTTGAGCCCAGGCACGCGGGCTGCTCAAGGAGGAATCCTTCGCC  
CAGTGCAACGGCACGGCCGGGCTGTGCCCCGACCTCGGGACCACGCTGGTGGAGNNNNN  
GACAGCCTGCAGCAGGACACGGGGCCCGCCCGCCGAAGAAGGTGAAGGTGGAGCCTCTC  
CTACC

>Elephant\_SIRT6

ATGTCGGTGAATTACGCGGCGGGGCTGTCGCCGTATGCTGACAAGGGCAAATGCGGCCTC

CCCGAGATCTTCGACCCCCAGAGGAGCTGGAGCGGAAGGTGTGGGCGCTGGCCCAGCTG  
CTCTGGGAGGCCTCCAATGTGGTCTTCCACACAGGCGCCGGCATCAGCACCTCCTCCGGT  
ATCCCCGACTTCAGGGGCCACATGGCGTCTGGACTATGGAGGAAAGGGGCCTGGCCCC  
AAGTTGATAACCACCTTCGAGAGCGCACGGCCCTCGAGACCCACATGGCGCTGGTGCAG  
CTGGAGCGGGTGGCCTGCTTCACTTCTGGTCAAGTCAAGACGTGGACGGGCTGCACATG  
CGCTCTGGCTTCCCCAGGGACAAGCTGGCCGAGCTTCATGGGAACATGTTTGTAGAAGAA  
TGCGTCAAGTGTAAAGACGAATACGTCCGGGACACAGTTGTAGGCAGCATGGGCCTCAAG  
GCCACCGCCGGTTCTGCACCGTGGCCAAGGCCAGGGGGCTGCGGGCCTGCAGGGGGTCTG  
CTGAGAGACACCATCCTGGACTGGGAGGACTCACTGCCTGACCGGGACCTCGCCCTCGCT  
GATGAGGCCAGCAGGAACGCCGACCTGTCCATCGCCCTGGGCACCTCCCTGCAAATCCGG  
CCCAGCGCAACTTGCCGCTGGCCACCAAGCGCCGGGGCGGCCGGCTGGTCATCGTCAAC  
CTCCAGCCCACAAACACGACCGCCACGCCGACCTGCGCATCCACGGCTACGTAGATGAC  
GTCATGACGCAGCTCATGAAGCACCTGGGGCTGGAGATCCCCGCTGGGACGGACCCCCG  
GTGGTGGAGAGGGCGCTGCCACCCTGCCCGCCCGCCCGCCCAAGCTGGAGCCCAGG  
GAGGAGGACCCTGCCAGCTCAACGGCTCAGCGCCCCAAGCCCCAAGCAGGAGTCCACT  
GCCCAGCACAACGGCTCCGGGCCCGCCAGCCCCAAGCGGGAGTGGCCAGACACTCCTGCT  
CTCTGCAGGCCCCCAAAAAGG

>Flycatcher\_SIRT6

ATGCAAAATCCTTCATGGATTTTTGACCCTCCGGAGGAGCTGGAGCGGAAGGTGCAGGAG  
CTGGCAGAGCTGATCCGGAGCTCCTCCAATGTGGTGTTCACACAGGGGGCGGGGATCAGC  
ACAGCCTCGGGGATCCCTGACTTCAGGGGCCCAATGGTGTCTGGACCATGGAAGAGAAA  
GGGCTCTCCCCAAAATTCGACACCACCTTTGAGAACGCCAGGCCCTCAAGACTCACATG  
GCGCTCTGGGGCTGCAGAGAGTGGGAATCCTGAAATCCTGGTCAAGCAGAACGTGGAC  
GGGCTGCACGTGCGGTCAAGATTCCACGGGACAAGCTGGCTGAGCTCCACGGGAACATG  
TTTGTGGAAGAGTGTGTGAAATGTGGGAAGCAGTACGTGCGTGATGCCGTCGTGGGCAGC  
ATGGGGCTCAAGCCCACAGGACGCCTCTGCAGCGTCACCAAGGCCCGGGGGCTGAGGGCC  
TGCAGAGGGAAGTTACGAGACACTATTCTGGATTGGGAGGATTCCCTGCCTGACCGTGAC  
CTGATGCTGGCAGATGAAGCCTGCAGGAAAGCCGATCTCTGTACCCCTGGGGACCTCT  
CTGCAGATCAAACCCAGCGGGAACCTCCCACTCATCACAAGAAGAGAGGAGGGAAGTTG  
GTCATTGTCAATCTCCAAGCAACCAACACGACCGCCAGGCCGACCTGCGCATCCACGGC  
TACGTCGATGAGGTGATGACCAAGCTGATGAAGCACCTGGGGCTGGAGGTGCCCCAGTGG  
ACGGGGCCGGTGGTGGTGGAGAGGGCTGAGGTGGCCAAGGCTGAGGTGGCCCAGGCTGAG  
GTGGCCCAGGCCAGCAGCTGCAGTGTCCCCTGAAGGAGGAGCCCCTGGCCCAGCAGCTG  
CAGTGTCCCCTGAAGGAGGAGCCCCTGGCCCAGCACAATGGCACGGTGTGCCGGTGCCG  
TGTGCCGGGCAGGCGCCCGGCAGCGCCGGGAGGGGGCTCAGGCTGGAGTGTCCCAGCCCC  
GACACGGGGCCAACGCCGGTGAAGAAGATGAAGGTGGAGCCTCTCCTCACC

>tropical\_clawed\_frog\_SIRT6

ATGTGGTGAATTATGCGGCTGGCCTGTCTCCCTATTCCGATAAAGGGACGATGTGGGCTC  
CCGGAGGCATTTGATCCACCGACGAACTGTGTGCAAGGTAGTGGAAGTACTGATATG  
ATTCGAAATCCTCTACGTAGTATTTACACGGGAGCCGGATCAGTACTTCTGCGGA  
ATCCCAGATTTAGGGGGCCTAATGGAGTGTGGACTCTGGAGGAGAAAGGTGTGAACCA  
AAGTTTGACATCACGTTTGAATCTGCATGTCCTTCCCCTACCCACATGGCGCTGCTTCA  
CTGCAGAGGGTTGGCATCCTGAAATTTTTGGTTAGCCAAAACGTAGATGGCTTGCATGTA  
AGATCTGGCTTCCCAGAGAGCAGCTGGCAGAAGTACATGGAAACATGTTCTGGAGGAA

TGCAGCAAATGTAGCAAACAGTACGTGCGAGATCAAGTTGTAGGAACCATGGGGCTCAA  
CCTACTGGGAGACTCTGTGATGTGCCAAGGTGCGAGCCTGAGAGCTTGCAGGGGAAG  
CTCAAAGACACCATTTTGGATTGGGAAGACTCACTTCTGACAGAGACCTAAACCTAGCC  
GATGAAGCCTGCAGGAAAGCAGACCTGTCCATTACATTGGGGACATCACTGCAGATTAGA  
CCCAGTGGGAACCTACCACTCCTCACCAAGCGCAAGGGTGGGAACTAGTTATTGTAAAC  
CTTCAGCCGACCAAGCATGACAAGCACGCGGATTTGAGAATACACGTTATGTGGATGAA  
GTGATGACACAGCTCATGGAGCTTTTGGGTACAAGATAACCAGTTTGGACTGGTATGCT  
ACTAAACAGAGCCAATAATGGAACTATAAGGAGGAAAATCATTCTACAATGATTCA  
GTGCTGGGTGCTAACCCAAACCAAAAAGAGAAGGATGCAAGGAAGAACCTAATCTCGAG  
CCAAAAAAGGCCAAAAGTTGAGCCAGCATGTGTA

>Fruitfly\_SIRT6

ATGAGCTGCAACTACGCGGATGGATTGTCAGCCTACGACAACAAGGGAATTTGGGAGCA  
CCAGAGAGTTTCGACAGCGATGAGGTTGTGGCCGAAAAGTGCCAGGAATTGGCTGAATTG  
ATCAAGAAATCGGGACACGTTGTCTCCACACGGGAGCTGGGATCAGTACGTCTGCAGGA  
ATTCCGGATTTCCGCGGACCCAAGGGCGTTTGGACCCTGGAGGAGAAGGGCGAGAAGCCG  
GACTTCAATGTTTCTTCGATGAAGCCAGACCAACTAAAACCCACATGGCTATCATAGCC  
CTGATTGAAAGTGGCTATGTGCAGTACGTAATCTCACAGAATATTGATGGTCTCCAATTG  
AAATCCGGACTGGATCGGAAGTATCTTCCGAATTGCACGGCAACATTTACATCGAACAG  
TGTAAGAAATGCAGACGGCAATTTGTGAGCCCATCTGCCGTGGAAACAGTGGGTCAAAAA  
TCCCTGCAACGTGCCTGCAAGTCTTCAATGGATAGCAAAGGTCGTAGCTGTAGATCGGGA  
ATCCTATACGATAACGTTCTGGACTGGGAGCACGATCTTCCGAAAACGACCTCGAAATG  
GGTGTGATGCACTCCACGTCGCTGACCTAAATATTGCGCTTGAACCACTTTGCAGATC  
GTTCCAGCGGAGACCTTCTTTAAAGAATCTAAAATGCGGTGGAAAATTTGTCATTTGT  
AATCTGCAGCCACAAAACATGACAAAAAGGCTAACTTAATCATATCCAGTTATGTGGAT  
GTGGTTTTGTCCAAAGTTTGTAAACTATTGGGTGTTGAGATACCCGAATATTCCGGAGGCT  
TCCGATCTACAAAGCAGTCCAAGCCAATGGAGTGGACAATACCCACAAGCAATGTAAAT  
ACCTTTCACAGACAATATAAAAAGTATGTAAAAGACTCAAAAATTGAATCTAAAGCTAAG  
AAAACAAAGTACACG

>Fugu\_SIRT6

ATGTCTGTGAATTATGCAGCCGGGCTTTCGCCGTACGCAGATAAAGGTGTCTGTGGTCTT  
CCCAGGAGTTTGATAGTGCTGAGGAAGTTAAGGCAAAGGTGGAGATCCTTGCCAGCTA  
ATAAAAGATTCTCGGCACTTGGTTGTCCACTCTGGAGCAGGAATAAGCACCTCATCGGGA  
ATCCCAGACTTCAGAGGGCCAAAGGGTGTGTGGACGTTGGAGGAGAAGGGCGAATCGCCT  
CAGTTTGAACGACGTTTGGGCTGCCCAGCCAGCTTAACTCACATGGCTCTCCTGGGA  
CTGCAGAGGGCCGGCTATCTCAAGTACCTCATCAGCCAGAACGTGGACGGCCTGCATGTC  
CGGTCAGGATTTCCCCGAGACATGCTGTGAGACTTCATGGAAACATGTTTCGTGGAGGAG  
TGTGAGAAGTGTGGCAGGCAGTACGTGAGAGATAAAGTGATTGGTGTGATGGCCTGAAA  
CCAACGGGGCGGCTCTGCGATGTGGTGCATCCAGGGGCCTAAGAGCCTGCAGGGGAAAG  
CTGATAAGCACTATACTGGACTGGGAGGATGCTTTGCCGATAGAGACCTGAACAAGGCA  
GAAGAAGCCAGTAGACAAGCGGATCTGGCTCTGACGCTGGGCACATCCATGCAGATCAAA  
CCCAGCGGAGACCTGCCCTCATCAGAAAGCGCAAGGGAGGAAAGCTGGCCATTGTCAAC  
CTACAGCCCACAAAGCACGACAAGCATTACATCCTGCGTATCCATGGTTATGTAGATGAT  
ATAATGAAACATCTGATGGAGCTGCTGGGATTGGACATTCCAAAGTGGGAGGGGCCAAC  
ATCTGCCAGAGTCCACAAGAACGTCGGAGTGCAAAGCTGATGTCAAACACATCAGTCG

GTTACTGTTGGCGTGAAGGTGAAAAAGGAGGTGAGGAAACGAGAAGCAGAGGCGTTAATG  
GACTGTTGGGACATTAAGGACGAGGTTTTGTTGAAGAAGGAGAAAGCAGAGTCTCCTGAG  
GCAGATGAAGAAAAACAAGTCTTTA

>Anole\_lizard\_SIRT6

ATGTCGGTGGACTACGCGGCGGGCCTGTCGCCCTACTCGGACAAAGGCGTGTGCGGCCTA  
CCGAGATCCTTTGACCCTCCAGAGGAGCTGGAGGAGAAGATCTCTCGCCTGGCGGACCTG  
ATCCGGGAGGCTTCCAACGTCTCTTCCACACCGGAGCCGGGATCAGCACCTCCTCGGGG  
ATCCAGACTTCCGAGGCCCAACGGGGTCTGGACCCTGGAGGAGCGTGGCCAGCCGGCC  
AAGTTGACACCACCTTTGAGGAGGCGCGTCTTCCCCGACCCACATGGCGCTGCTGGGC  
CTCCACCGGGCCGGCCTGCTCCACTTCTGGTCAGCCAGAACGTGGACGGCCTTACAGTC  
CGCTCCGGCTTCCCCAGGGACAACTGGCCGAGCTGCACGGGAACATGTTCTGTGGAGGAA  
TGCATGAAGTGCGGCAAGCAGTACGTGAGGGAGACGGTGGTGGGACGATGGGCCTGAAG  
CCGACGGGGAGGCTGTGCGACGTCTCAAGCGCCGAGGGCTCCGCGCCTGCAGAGGGAAG  
CTGATGGACACCATCTTGGACTGGGAAGATTCCCTGCCCGACCGGGACCTCCTCCTCGCC  
AGCAAGGCCAGCAGGAAGGCCGACCTGTCCGTCACCCTGGGGACCTCCTTGCAGATCAAG  
CCCAGCGGGGACCTGCCGCTCCTGACCAAGCGCAAGGGTGGCCGGCTGGTCATCGTCAAC  
CTCCAGCCCACAAACACGACAAGCAGGCCGACCTGCGCATCCATGCATATGTGGATGTG  
GTCATGACGAAGCTGATGGGGCGGCTGGGCCTGGACATCCCCGAGTGGACCAAGCCCAGC  
CCCCACCCCGGCCGTGCCCAAAGAGGAGAAGGCTCCACGCTACAACGGCGCCGCCGCT  
CTCTGCAAACAGGAGCCGTGCACCCCGACGCCAAGCGGTTCAAGCTGGAGCCGCTCCCT  
TCC

>Horse\_SIRT6

ATGTCGGTGAATTACGCGGCGGGGTTGTGCGCCGTACGCGGACAAGGGCAAGTGCGGCCTT  
CCCAGATCTTTGACCCCCAGACGAGTTGGAGCGGAAGGTGTGGGAGCTGGCACAGCTG  
GTCTGGCAGTCTCCAACGTGGTGTTCACACGGGCGCAGGCATCAGCACCGCCTCGGGC  
ATCCCTGACTTCAGGGGTCCCATGGCGTCTGGACAATGGAGGAGCGGGGCTGGCCCC  
AGGTTGACACGACCTTCGAGATGGGCCGGCCACTCAGACGCACATGGCGGCTGGGTGC  
AGCTGGAGCGCGTGGGGCCTCCTGCGTCTCTGGTCAGCCAGAACGTGGCCGGTCTCCAG  
GTGCGGCCCGGGTTTCCAGGGACAAGCTGGCAGAGCTGCACGGGAACATGTTTGTAGAA  
GAATGTGTCAAGTGTAAAGACGCAGTACGTCCGGGACACCGTCGTGGCAGCATGGGCCCTC  
AAGGCCACGGGCCGGCTGTGCACCATGGCCAAGGCCAGGGGGCTGCGGGCCTGCAGAGGG  
GAGCTGAGAGACCATCCTCGACTGGGAAGATGCTCTGCCTGACAGGGACCTCACTCTC  
GCCGACGAGGCCAGCAGGTCTGAGCCCCGGATGAGCCCAGGGTGGGGCGGGCGGGGACCT  
GGGCGAAACAGCCAGCGCCAGCCAGGGCAGGGGATGCCAGCTCAGAGGGGGAGTCAGA  
GGAGGCTTCTGGAGGAGGCGGCCCTCTCTGGGCCTCACTTGCCCGTAATAACAGCAGCT  
CCTGTGTAC

>Human\_SIRT6

ATGTCGGTGAATTACGCGGCGGGGCTGTCGCCGTACGCGGACAAGGGCAAGTGCGGCCTT  
CCGAGATCTTCGACCCCCGAGGAGCTGGAGCGGAAGGTGTGGGAACTGGCGAGGCTG  
GTCTGGCAGTCTTCCAGTGTGGTGTTCACACGGGTGCCGGCATCAGCACTGCCTCTGGC  
ATCCCCGACTTCAGGGGTCCCACGGAGTCTGGACCATGGAGGAGCGAGGTCTGGCCCC  
AAGTTGACACCACCTTTGAGAGCGCGCGGCCACGCAGACCCACATGGCGCTGGTGCAG  
CTGGAGCGCGTGGGCCTCCTCCGCTTCTGGTCAGCCAGAACGTGGACGGGCTCCATGTG  
CGCTCAGGCTTCCCCAGGGACAACTGGCAGAGCTCCACGGGAACATGTTTGTGGAAGAA

TGTGCCAAGTGTAAAGACGCAGTACGTCCGAGACACAGTCGTGGGCACCATGGGCCTGAAG  
GCCACGGGCCGGCTCTGCACCGTGGCTAAGGCAAGGGGGCTGCGAGCCTGCAGGGGAGAG  
CTGAGGGACACCATCCTAGACTGGGAGGACTCCCTGCCGACCGGGACCTGGCACTCGCC  
GATGAGGCCAGCAGGAACGCCGACCTGTCCATCACGCTGGGTACATCGCTGCAGATCCGG  
CCCAGCGGGAACCTGCCGCTGGCTACCAAGCGCCGGGGAGGCCGCCTGGTCATCGTCAAC  
CTGCAGCCCACCAAGCACGACCGCCATGCTGACCTCCGCATCCATGGCTACGTTGACGAG  
GTCATGACCCGGCTCATGAAGCACCTGGGGCTGGAGATCCCCGCCTGGGACGGCCCCCGT  
GTGCTGGAGAGGGCGCTGCCACCCCTGCCCGCCCGCCACCCCAAGCTGGAGCCCAAG  
GAGGAATCTCCACCCGGATCAACGGCTCTATCCCCGCCGGCCCAAGCAGGAGCCCTGC  
GCCCAGCACAACGGCTCAGAGCCCGCCAGCCCCAAACGGGAGCGGCCACCAGCCCTGCC  
CCCCACAGACCCCCAAAAGGGTGAAGGCCAAGGCGGTCCCCAGC

>Macaque\_SIRT6

ATGTCGGTGAATTATGCGGCGGGGCTGTCGCCGTACGCGGACAAGGGCAAGTGCGGCCTC  
CCTGAGATCTTCGACCCCCGGAGGAGCTGGAGCGGAAGGTGTGGGAGCTGGCAAGGCTG  
GTCTGGCAGTCTTCCCATGTGGTGTCCATACGGGTGCCGGCATCAGCACTGCCTCTGGC  
ATTCCCGACTTCAGGGGTCCCCACGGAGTCTGGACCATGGAGGAGCGAGGCCTGGCCCC  
AAGTTCGACACCACCTTTGAGAGCGCACGGCCACGCAGACCCACATGGCGCTGGTGCAG  
CTGGAACCGTGGGCCTCCTTCGTTCTCTGGTCAGCCAGAACGTGGACGGGCTCCATGTG  
CGCTCAGGCTTCCCTAGGGACAAATTGGCAGAGCTTCATGGGAACATGTTCTGTGAAGAA  
TGTGCCAAGTGTAAAGACGCAGTATGTCCGGGACACAGTCGTGGGCACCATGGGCCTGAAG  
GCCACGGGCCGGCTCTGCACCGTGGCTAAGGCAAGGGGGCTGCGGGCCTGCAGGGGGGAG  
CTGAGGGACACCATCCTAGACTGGGAGGACTCCCTGCCGACCGGGACCTGGCACTCGCC  
GATGAGGCCAGCAGGAACGCCGACCTGTCCATCACGCTGGGAACATCACTGCAGATCCGA  
CCCAGTGGGAACCTGCCGCTGGCTACCAAGCGCCGGGGGGGCCGCTGGTCATCGTCAAC  
CTGCAGCCCACCAAGCACGACCGCCATGCTGACCTCCGCATCCACGGCTACGTCGACGAG  
GTCATGACCCGGCTCATGAAGCACCTGGGGCTGGAGATCCCCGCCTGGGACGGCCCCCAC  
GTGCTGGAGAGGGCGCTGCCACCCCTGCCCGCCCGCCTACCCCAAGCTGGAGCCCAAG  
GAGGAATCACCCACCCGGATCAACGGCTCTATCCCTGCCGGCCCAAGCAGGAGCCCTGC  
GCCCAGCACAACGGCTCAGAGCCCGCCAGCCCCAAACGGGAGCGGCCACCAGCCCTGCC  
CCCAACAGACCCCCAAAAGGGTGAAGGCCGAGGCGGTCCCCAGC

>Medaka\_SIRT6

ATGTCAGTAAATTATGCTGCCGATTGTACCTTACGCAGATAAGGGGGTCTGCGGCCTT  
CCTGAGAAGTTTGACAGTCTGAAGAGCTGAAGGAGAAGGTGCAGACTCTTGCTGAGTTG  
GTTAAAGAATCTCAGTACCTGGTCGTCCACACTGGAGCTGGCATCAGCACCTCAGCCGGC  
ATCCCTGACTTCAGGGGTCCCAAAGGAGTGTGGACTCTAGAGGAAAAGGGTGAAGTCGCCT  
CACTTTGATACGACGTTTGAAGACGCTCGGCCAGCTTGACTCACATGGCCCTCCTGGGA  
CTGGAGAGGGCCGGTACCTCAAGTATCTGATCAGCCAGAACGTTGACGGCCTGCATGTT  
CGTTCAGGCTTTCAGGGACAAGTTATCAGAGCTTCACGGAACATGTTTGTGGAGGAG  
TGTGAGAAGTGTGGCAGACAATATGTCAGAGACAAGGTGATTGGCGTGATGGGACTCAAA  
CCAACAGGCCGTTTCTGCAGTGTGGTGGATCCAGAGGACTGAGGGGCTGCAGAGGGAAG  
CTGATCAGCACAATATTGGATTGGGAGGACGCACTTCTGACAGGGATCTGAACCGAGCG  
GATGATGCAAGCAGGAAAGCAGACCTGGCACTGACTCTGGGCACGTCCATGCAGATCAAA  
CCCAGCGGAGACCTCCACTCCTCACAAGCGCAAAGGAGGGAGGATAGCTATAGTCAAC  
CTGCAGCCCACAAAGCATGACAAACAGGCCACCTCCGTATCCATGGTTACGTGGACGAG

GTCATGAAACAGCTGATGGAGCAGTTAGGCTTAGACATCCCAAAGTGGGAGGGACCTGTT  
GTGCATGAGAGCTCTGAAGTCCTGCCGACATCAAACCACCGCACTGCATTTCTGCTGAC  
GGGAAGGTGAAAAAGGAAGAAATATAAATAGAGAGAAAAAGAGAAGCAACACAATAACA  
GGCGAGGAGGATGTGAAGGAGGAGGCAGGTTTCAGTAAAAAAGGAGAGAGCAGATTTGACA  
TTGTTAATAAATGAAGAAAA

>Mouse\_SIRT6

ATGTCGGTGAATTATGCAGCAGGGTTGTCGCCTTACGCGGATAAGGGCAAGTGCGGGCTG  
CCCCGAGATCTTCGACCCACCAGAGGAGCTGGAACGCAAGGTGTGGGAGCTGGCCCCGCTA  
ATGTGGCAGTCCTCCAGCGTGGTTTTCCACACGGGCGCCGGCATCAGCACCGCCTCTGGC  
ATCCCCGACTTCAGAGGCCCCCATGGCGTGTGGACCATGGAGGAACGCGGCCCTGGCCCC  
AAGTTTGACACCACCTTCGAGAATGCTCGGCCCTCGAAGACCCACATGGCCCTGGTTTCA  
CTAGAACGCATGGGCTTCTCAGCTTCTGGTCAGCCAGAACGTAGACGGGCTGCACGTG  
CGCTCGGGCTTCCCCAGGGACAAGCTGGCAGAGCTGCACGGAACATGTTTGTAGAGGAA  
TGTCCAAGTGTAAAGACGCAGTACGTACAGACACGGTTGTGGGCACCATGGGCCTCAAG  
GCCACAGGCCGGCTCTGCACCGTGGCCAAGACCAGGGGACTTCGGGCCTGTAGAGGGGAG  
CTGAGAGACACCATTCTGGACTGGGAGGACTCGTTGCCTGACCGGGACCTGATGCTCGCT  
GATGAGGCCAGCAGGACCGCAGACCTGTCTGTACCCTGGGTACCTCGCTGCAGATCCGC  
CCCAGTGGGAACCTGCCCTTGCCACTAAGCGCCGAGGAGGCCGTCTGGTCATTGTCAAC  
CTGCAACCCACAAAACATGACCGCCAGGCTGACCTGCGCATCCACGGCTACGTGGATGAG  
GTGATGTGCAGACTCATGAAGCATCTGGGGCTGGAGATTCCAGCCTGGGATGGACCCTGC  
GTGCTAGACAAAGCCCTGCCACCTCTGCCTCGCCAGTAGCACTCAAGGCTGAGCCCCC  
GTGCATCTCAATGGTGCAGTGCATGTTTCGTATAAGTCCAAGCCCAACAGCCCTATACTC  
CACAGGCCCCCAAAGAGTGAAGACCGAGGCTGCCCCCAGC

>Naked\_mole\_rat\_SIRT6

ATGTCGGTGAACACTACGCGGGCGGGCTGTGCCGTATGCGGATAAGGGCAAGTGTGGCCTC  
CCCCGAGATTTTTGACCCCCGAAGGAGTTGGAGCTGAAGGTGTGGGAGCTGGCCAGGCTG  
GTGTGGCAGTCCTCAATGTGGTGTTCACACAGGCGCTGGCATCAGTACTTCTCAGGC  
ATCCCTGACTTCAGGGGCCCGCACGGTGTGTGGACCATGGAGGAGCGGGGTCTGGCGCC  
AAGTTGACACGACCTTTGAGAGCGCGGCCACGCGCACACACATGGCGCTGGTGCAG  
CTGGAGCGCGTGGGGCTGTGCACTTCTCGTACCCAGAACGTGGACGGGCTGCATGTG  
CGCTCCGGCTTCCCCAGGGACAACTGGCAGAGCTGCATGGGAACATGTTGTAAGAA  
TGTGCCAAGTGTAAAGACGCAGTACGTCCGGGACACGGTCTGGGCACCATGGGCCTCAAG  
GCCACCGGGAGTTCTGCACAGTGGCCAAGGCGCGGGGACTGCGGGCTTCCGGGGGGGAG  
CTGAGAGACACCATCCTGGACTGGGAAGATGCCCTGCCTGAGCGGGATCTGGCTCTCGCC  
GACGAGGCCAGCAGGAACGCGGACCTGTCCATCACCTGGGGACCTCCCTGCAGATCCGG  
CCCAGCGGGAACCTGCCCTGGCCACCAACGCCGGGGCGGCCGCTGGTCATTGTGAAC  
CTGCAGCCCACCAAGCACGACCGCCAGGCTGACTTGCATCCACGGCTACGTGGACGAT  
GTGATGGCTGGGCTCATGCGACACCTGGGGCTGGACATCCCCGCTGGCACGGGCCCCGA  
GTGCTGGAAAGGGCCCTTCCCCACTGCCCGGCCTCCCGCACCAAGCTGGAGCAGAAG  
GATGACAAGGGTGAGGACTCTACAGCCAGCTCAATGGCTCTGCGCCACCCAGCCCAAG  
CCAGAGCCCAGCAGCCCCAACTGGAGCGGCCGAGAGCCTGGCCCTTGCAGGCCCCCC  
AAGAGGCTGAAGGCTGAGGCAGTCCCCAGC

>Opossum\_SIRT6

ATGGAAGAAAGGGTCTGGCACCCAAGTTTGACACAACATTTGAGAGTGGCCAGCCTTCT

AAGACCCACATGGCCCTGATTCAACTGGAGCGAGTGGGCATCTTGAAATCCTGGTGAGC  
CAGAATGTAGATGGTTTGCACGTACGCTCCGGCTTCCCAGGGACAACTGGCCGAGCTC  
CATGGGAACATGTTTGTGGAAGAATGTGCCAAGTGTAAAGACGCAGTATGTACGAGATGTG  
GTGGTGGGCAGCATGGGCTCAAGGCAACAGGTCGGTTGTGCACTGTGGCAAAGGCCCGA  
GGTCTCCGGGCCTGCAGGGGGAACTGAGGGACACAATCCTGGACTGGGAAGATGCTCTA  
CCTGATCGAGACCTCAGCCTTGCTGATGAAGCTTGCAGGAATGCAGATCTATCCATCACG  
CTGGGTACATCACTGCAGATACGACCCAGTGGCAACCTGCCTCTGCTCACTAAACGCAAA  
GGAGGCCGCTTGGTCATAGTCAACCTGCAGGCCACCAACATGATCGCCAGGCTGACCTT  
CGAATTCATGGCTACGTCGATGATGTCATGGCCAAGCTCATGAAGCACCTATGCTTGGAG  
ATCCCTGAGTGGCAGGGGCCCTTGTGGTGGAAACAAGCCCCACCCCTTTACCCCTTCCG  
ATACAGGTGAAAGCTGAGCCCCCACCTGCAAGCCCTGCCTGCAGCACCCAAGGCAGAG  
GCCTCTGTCCAGCGCCACAGACCAAAGCAGGAAGGGGGCAAACGGGAGCAACCCCTGCT  
ACCCAGCTGCCAAGAGGCTGAAGGTGGAACCTATGCCCAGC

>Orangutan\_SIRT6

ATGTCGGTGAATTACGCGGCGGGGCTGTCGCCGTACGCGGACAAGGGCAAGTGCGGCCTT  
CCCAGATCTTCGACCCCCAGAGGAGCTGGAGCGGAAGGTGTGGGAACTGGCGAGGCTG  
GTCTGGCAGTCTCCAATGTGGTGTTCACACGGGTGCCGGCATCAGCACTGCCTCTGGC  
ATCCCCGACTTCAGGGGTCCCCACGGAGTCTGGACCATGGAGGAGCGAGGTCTGGCCCC  
AAGTTGACACCACCTTTGAGAGCGCGCGGCCACGCAGACCCACATGGCGCTGGTGAG  
CTGGAGCGCGTGGCCTCTCCACTTCTGGTCAGCCAGAACGTGGACGGGTCCATGTG  
CGCTCAGGCTTCCCAGGGACAACTGGCAGAGCTTACGGGAACATGTTTGTGGAAGAA  
TGTGCCAAGTGTAAAGACGCAGTATGTCCGGGACACAGTCGTGGGCACGATGGCCTGATA  
GCCACGGGCCGGCTCTGCACCGTAGCTAAGGCAAGGGGGCTGCGGGCCTGCAGGGGAGAG  
CTGAGGGACACCATCCTAGACTGGGAGGACTCCCTGCCGACCGGGACCTGGCACTCGCC  
GATGAGGCCAGCAGGATATGAACGCCGAACCTGTCCATCACGCTGGGCACATCGCTGCAG  
ATCCGACCCAGCGGGAACCTGCCGCTGGCTACCAAGCGCCGGGGAGGCCGCTGGTCATC  
GTCAACTTGCAGCCCACCAAGCACGACCGCCATGCTGACCTCCGCATCCATGGCTACGTT  
GACGAGGTCATGACCCGGCTCATGAAGCACCTGGGGCTGGAGATCCCCGCTGGGACGGC  
CCCCGTGTGGCTGGAGAAGGCCGCTGACCACCCCTGCCCCGTCCGCCACCCCAAGCTG  
GAGCCCAAGGAGGAATCACCCACCCGGATCAACGGCTCTATCCCCGCGGGCCCAAGCAG  
GAGCCCTGCGCCAGCACAACGGTTCAGAGCCCGCCAGCCCCAAACGGGAGCGGCCACCC  
AGCCCTGCCCCCACAGACCCCCAAAAGGGTGAAGGCCGAGGTGGTCCCGAGC

>Western\_painted\_turtle\_SIRT6

ATGGAGGAGAGGGGATTGTCCCCAAGTTTGACACTACCTTTGAGAACCGGAGGCCTTCC  
AAGACCCACATGGCGCTGCTGGAGCTGCAGAGAGTCGGCATCTTGAAATCCTGGTCAGC  
CAAAACGTGGATGGCCTGCATGTGCGTTCTGGATTCCCACGGGACAAGCTGTCCGAGCTG  
CACGGGAACATGTTTGTGGAGGAATGTGTGAAATGCGGCAAGCAGTACGTGCGGGACGTT  
GTCGTGGGCAGCATGGGCTCAAGCCGACAGGCAGGCTGTGCGATGTCTCCAAAGCAAGA  
GGGCTTCGTGCCTGCCGAGGAAAGTTAATAGACACCATTTAGACTGGGAAGATTCTCTG  
CCTGATCGGGACCTCAGCCTAGCAGACGACGCTGCAGGAAAGCTGACCTATCAGTCACT  
CTGGGGACCTCTTTCAGATCAAACCCAGTGGCAATCTCCCGCTGCTCACTAAAGGAAA  
GGAGGGAAGCTGGTCATAGTAAATCTGCAAGCAACGAAGCACGACCGGCAAGCCGACCTG  
CGCATCCACGGCTACGTGGATGAAGTCATGACAAAGCTGATGAAGCAGCTTGGTCTGGAG  
ATCCCCGAGTGGACGGGGCCGGCGGTGGTGGAGAGTTCTGAGCTTGTGAAGCCCGAACCA

GCCCTAAACTCGACCCGGACGCTCAGCGCCCAGCCAAGGAAGAACCCTGCTCCCACCAC  
AATGGCACGGCAGAGGGGGCTGACGGGATACGCCGGGGCTCGGCACGGCACGGCAGGAG  
CACTGTGACGGTCTGAAGCAGGAATGTCCTGGCTCAGGCCACAGTCCCGTAGCAGCCAAG  
AGAGTAAGAGTGGAGTCGCTGCTCACC

>Panda\_SIRT6

ATGTGCGTGAATTACGCGGCGGGACTGTGCGCGTACGCGGACAAGGGCAAGTGTGGCCTC  
CCCAGATCTTCGACCCCCTGAGGAGTTGGAGCGGAAGGTGTGGGAGCTGGCGCAGCTG  
GTCTGGCAGTCTCCAACGTGGTGTTCACACGGGTGCTGGCATCAGCACCGCCTCGGGG  
ATCCCTGACTTCAGGGCCCCCATGGTGTCTGGACGATGGAGGAGCGGGGCTGGCCCC  
AAATTTGACACCACCTTCGAGAGCGCGCGGCCACGCAGACCCACATGGCGCTGGTGCAG  
CTGAGAGCGGTGGCCTCTCCGTTTCTGGTCAGCCAGAACGTGGATGGGCTGCACGTG  
CGTCCGGTTTCCCAGGGACAAGCTGGCGGAGCTCCACGAAACATGTTCTGATAGAGGAG  
TGTGTCAAGTGTAAAGACGCAGTACGTCCGGGACACCGTCTGTTGGGACATGGGCCTCAAG  
GCCACGGGCCGCTCTGCACTGTGGCAAGGCGAGGGGGCTGCGGGCCTGCAGGGGGGAG  
CTGAGAGATAACCATCTGGACTGGGAGGACGCCCTGCCTGACCGGGACCTCACTCTCGCT  
GATGAGGCCAGCAGGAACGCAGACCTGTCCATCACACTGGGCACCTCCCTGCAAATCCGG  
CCGAGCGGGAACCTGCCGTTGCCACCAAGCGCCGAGGAGGCCGACTGGTCATTGTCAAC  
CTTCAGCCCACGAAGCATGACCGCCACGCTGACCTGCGAATCCATGGCTATGTGGACGAG  
GTCATGACCCGGCTCATGAAGCACCTGGGCCTGGAGATTCCCGCCTGGGACGGCCCCCGC  
GTGCTGGAGAGGGCGCTGCCCCCTGCCCGCCCGCCCGCCCAAGCTGGAGCCCAAG  
GAGGAGGCCCCACCCAGCTCAATGGCCCAGACCCGCCAGCCCAAGCCGGAGCCCTCC  
TCGGAGCCCTGCACCCAGCACAACGGCTCTGGGCCCGCCAGCCCAAGAGGGAGCGGCTG  
GACAGTCTGCACTGCACAGGCCCCCAAAAGGGTGAAGGCCGAGGTGGCCCCCAGC

>Rock\_pigeon\_SIRT6

ATGTGGGGACCCTTTATTTTTGACCCGCCGGAGGAGCTGGAGAGGAAGGTGCGGGAGCTG  
GCGGACCTGATCAGGAGCTCCTCCAATGTGGTGTTCACACGGGGGCTGGAATCAGCACC  
GCCTCGGGGATTCTGACTTCAGGGGGCCCAATGGTGTGTGGACTATGGAAGAGAAGGGG  
CTCTCCCCAAATTCGACACCACCTTTGAGAACGCCCGCCCTCCAAGACCCACATGGCG  
CTGCTGGGGCTGCAGAGAGTCGGCATCCTGAAGTTCCTGGTCAGCCAGAACGTGGACGGC  
CTGCACGTGCGTTCGGGATTCCACGGGACAAGCTGGCCGAGCTGCACGGGAACATGTTT  
GTGGAAGAGTGCATGAAATGCGGCAAGCAGTACGTGCGCGACGCCGTGGTGGGCAGCATG  
GGGCTGAAGCCGACGGGCCGGCTGTGCAGCGTACCAAAGCGCGGGGGCTGCGCGCCTGC  
AGAGGGAAGTTACGAGACACCATCCTGGACTGGGAGGATTCCCTGCCGGACCGTGACCTG  
ACGCTGGCAGACGAAGCCTGCAGGAAAGCCGATCTCTCCGTCACGCTGGGGACCTCTCTG  
CAGATCAAACCCAGTGGCAACCTCCCGCTGATCACCAAGAAGAGGGGAGGGAAGCTGGTC  
ATCGTCAACCTGCAAGCAACCAACACGACAGACAGGCCGACCTGCGCATCCACGCCTAC  
GTGACGACGTCATGACGAAGCTGATGAAGCATTGGGGCTGGAGGTCCCGAGTGGACG  
GGGCCGGTGGTGGTGGAAAGCGCCGAGCTCCCCAAACCCGAACAGCTCTTGAATTTGCC  
CCCGGGGCTCACGGGCCGCTGAAGGAGGAGCCCCTGTCGACGAGAACGGCACGGGGGGG  
CTCGGCCCGGACCGCGGGACCACGCTGGGCGAGCGCCGCGACAGTTTGAAGCAGGAGCGT  
CCCAGCCCGGACACGGGGCCAACGACGGTGAAGAAGATGAAGGTGGAGCCTCTCGCCACC

>pig\_SIRT6

ATGTGCGTGAATTATGCGGCTGGCCTGTGCGCGTACGCAGACAAGGGCAAGTGCGGTCTC



CCCGAGGTGTTTGACCCCCCTGAGGAATTGGAGCAGAAGGTATGGGAGCTGGCACAGCTG  
GTCTGGCAGTCCTCCAACGTGGTGTCCACACGGGCGCGGGCATCAGCACCGCCTCAGGC  
ATCCCTGACTTCAGGGGTCCCCATGGTGTCTGGACAATGGAGGAGCGAGGCCTGGCCCC  
AAGTTGACACCACCTTCGAGAACGCGAGGCCACGAAGACCCACATGGCACTGGTGCAG  
CTGGAGCGCGTGGCCTCCTCCGCTTCTGGTCAGCCAGAACGTGGATGGGCTGCATGTG  
CGATCCGGCTTCCCCAGGACAAGCTGGCAGAGCTTCATGGAAACATGTTCTGTAAGAA  
TGTGTCAAGTGTAAAGACGCAATACGTCCGGGACACCGTGGTGGGGAGCATGGCCTGAAG  
GCTACCGGCCGCTCTGCACCGTGGCCAAGTCAAGGGGGCTACGGGCCTGCAGGGTGGAG  
CTGAGAGACACCATCCTAGACTGGGAGGATGCCCTGCCTGACCGAGACCTCACCTCGCT  
GACGAGGCCAGCAGAACGCCGACCTGTCCATCACGCTGGGCACCTCCCTGCAAATCCGG  
CCCAGCGGGAACCTGCCCTCACCACCAAACGCCGGGGGGCCGGCTGGTCATTGTCAAC  
CTTCAGCCCACCAAGCACGACCGCCATGCAGACCTGCGTATCCACGGCTACGTAGATGAG  
GTCATGACCCGGCTCATGAAGCACCTGGCCTGGAGATCCCGCCTGGGACGGCCCCCGT  
GTCCTAGAGCTCACTTTACTCGTCTCTGCCCTTGTGGGGAGACCTCAGGACTCTGAG  
AGCTGGGCTCCAGGCCACATTACACCTCCCTTAGCTTGGGGCCTCTGGAGGGGGCCTGG  
CAAGGGGCATCCCTGCCCTGGGCC

>Platyus\_SIRT6

ATGGAAGAACGTGGATTGGAGCCAAATTTGACACAACCTTTGAGAGCGCCAGGCCCTCT  
AAGACCCACATGGCCCTGCTGGAAGTGGAGCGTGTGGTATCCTGAAGTTCCTGGTGAGC  
CAAATGTGGATGGCTTGCACGTGCGCTCTGGATTCCCAGGGACAACTGGCAGAGCTC  
CACGGAACATGTTTGTGGAGGAATGTGTTAAATGCAAGAAGCAGTACGTGCGTGACACG  
GTGGTGGCAGCATGGGACTCAAGGCGACGGTTCGGCTGTGCAGCGTGGCAAGGGTCGT  
GGCCTCCGGCCTGCAGAGGAGAGCTCCGGGACACCATCTTAGACTGGGAGGACTCCCTG  
CCGGACCGGGACCTCAACCTCGCGGACGAAGCGTGCAGGAACGCCGATCTGTCCATCACC  
CTGGGCACCTCGCTGCAGATCAAGCCCAGCGCAATCTTCCCCTCATCACCAAGCGCAAA  
GGTGGCAAGCTGGTCATCGTCAACCTCAGGCCACCAAGCATGTGAGTGAGCCGCCGGGC  
AGAGCCCTCGTCCCCCGTGGGGACCACTGCCTGTACCCCGTCCCCTCCCGAGCCGGC  
CTTAGGCCAGACAGAAGGAGCCTCTGGCTCGGCGGGCGTTGAGAGGCCAGGCCAGACGG  
CTACCGGAAAGCGTGAGAGGCAGCGGCCGGAAGCCCGCTCACCTGCTCGGCTGCCGCT  
TCCTCTCAACCCTGCCACGGCGAGGGCCAGAGGGGCCCTCGAGACCGCAGCGTTTCA  
CTTCTCTGGTGCGCCGGGGCGGATACGGGTGGGAGAGA

>Tetraodon\_SIRT6

ATGTCTGTGAATTATGCAGCCGGGCTCTCGCCGTACGCAGATAAAGGTGTCTGTGGTCTT  
CCCAGGAGTTTGATAGTCTGATGAACTTAAGGCAAAGGTGGAGATCCTTGCTCAGCTC  
ATAAAAGAATCCCAGTACTTGGTTGTCCACTCTGGGGCAGGAATAAGCACCTCGGCAGGC  
ATCCCAGACTTCAGGGGCCAAAGGGCGTGTGGACGTTGGAGGAGAAAGGTGAATCACCT  
CAGTTTGAACGACGTTTGGAGACGCCGACCCAGCTTAACTCACATGGCCCTCCTTGA  
CTGCAGAGGGCCGGCTACCTCAAGTACCTCATCAGCCAGAATGTGGACGGTCTGCATGTC  
CGCTCGGGATTCCCAGGGACATGCTGTGAGAGCTTCATGGAAACATGTTTGTGGAGGAG  
TGCGAGAAGTGTGGCAGGCAGTATGTGCGAGACAAAGTATCGGCGTCATGGGCCTGAAA  
CCAACAGGACGGCTCTGCGATGTGGTGCATCCATGAGCCTCAGAGCCTGCCGAGCAGGT  
GAGACGGCAAAGACTGCATGTGTCTTAGAAGAGTGCAGTTCTGGTATTGCTAAAGTCAAT  
CGTGACAACCTCCACAGACGAGCAGACCTGGCGCTGACGCTTGGGACGTCCATGCAGATC  
AAACCTAGTGGAGATCTGCCCTCATCAAAGCGCAAGGGAGGAAAGCTGGCCATCGTC

AACCTGCAGCCCACTAAGCATGACAAGCATTACATACCTGCGTATCCATGGTTACGTGGAT  
GATATCATGAAACAGCTGGTGGAGCTGCTGGGACTTGACGTTCCAAAATGGGAGGGTCCG  
ACCGTCTGCGAGAGGTCCACAATAACGCCAGAGTGACGGCTGATGTCAAACACCCAG  
TCGGCTCCTGTC

>Tilapia\_SIRT6

ATGTCTGTGAATTATGCAGCTGGACTCACGCCGTACGCAAAACAAAGGTGTCTGCGGACTT  
CCTGAGCACTTTGATAGTCTGAGGAGCTGAAGGCCAAGGTGGAGACTCTAGCTCAGCTG  
ATTAAAGAATCTCAGTACTTGGTTGTCCACTCAGGAGCTGGGATCAGCACCTCGGCAGGT  
ATCCCTGACTTCAGGGGTCCAAGGGTGTGTGGACTCTTGAAGAAAAGGGTGAGTCGCCT  
CATTTTGATACCACATTTGAAGATGCTCGCCCAAGCTTGACTCACATGGCTCTCCTGGGA  
CTACAGAGGGCAGGGTACCTCAAATATCTCATCAGCCAGAATGTGGACGGCCTGCATGTG  
CGATCAGGCTTCCCAGGGATTGTTATCAGAGCTTCATGGGAACATGTTTGTGGAGGAG  
TGTGAGAAGTGTGGCAGGCAGTACGTCCGAGAAAAGGTGATCGGTGTGATGGGCCTGAAA  
CCGACAGGACGCTACTGCGAGGTGGTACGATCCAGGGGGCTCCGAGCGTGCAGAGGGAAG  
CTGATCAGCACTATACTTACTGGGAGGATGCTCTTCTGACAGAGACCTGAACAAAGCA  
GATGACGCAAGCAGACGAGCGGACCTGGCTCTGACGCTGGGCACGTCCCTGCAGATCAA  
CCCAGTGGAGACCTCCACTCCTACCAAGCGCAAGGGTGGCAAACCTGGTTATTGTCAAC  
CTGCAGTCGACCAACATGACAAGCATGCACACCTGCGTATGCATGGTTATGTGGACGAC  
GTCATGAAACAGCTGATGGAGCTGCTGGGACTGGAAATCCCAAAGTGGGATGGACCAACT  
GTCTGCGAGAGCTCCACAGCTACCACTGAGACCACCGCTGATGTCAAACCACCGCCTGGT  
GTTACTGCGAAGGAAAAGGTGGAAAAGAACTTCGTTAAGGAGGAGAGGAAAAGAGGAGCT  
TCACAGCTAACAGACGATGGAAGCGTTAAGGAGGAGACAGTTTCAGTAAAGAGGGAGAGA  
GCGGACCTCCCGCTGGAGATAAATGAAGAGAAA

>Turkey\_SIRT6

ATGGCGGTGAATTACGCGGCCGGGCTCTCGCCCTACTCGGATAAGGGCAAGTGCGGCCTC  
CCCAGATTTTTGATCCACCAGAAGAGCTGGAGAGGAAGGTGTGTGAGCTGGCAGACTTG  
ATAAGGAGTTCTTCCAATGTGGTGTCCACACAGGAGCTGGCATCAGCACCGCCTCGGGG  
ATTCTGACTTCAGGGGGCCTAATGGTGTCTGGACTATGGAAGAGAAGGGGCTTTCCCA  
AAATTTGACACCACCTTTGAGAATGCCAAGCCCTCCAAAACCTCACATGGCACTTCTGGGG  
CTGCAGAGAGTTGGCATCTGAAATTCCTGGTCAGCCAGAACGTGGATGGCCTTCATGTG  
CGCTCAGGATTCACGGGACAAGTTGGCTGAGCTCCACGGGAACATGTTTGTGGAGGAG  
TGCATGAAATGTGGCAAGCAGTACGTGCGGGATGCTGTTGTGGGCAGCATGGGGCTGAAG  
CCAACAGGCAGGCTGTGCAGCGTCACCAAAGCACGAGGGCTACGAGCCTGCAGAGGGGAA  
TTAAGAGACACTATTCTGGACTGGGAAGATTCCCTGCCTGACCGTGACCTCACACTAGCA  
GATGAAGCCTGCAGGAAAAGCTGATCTCTGTTACTGGGGACCTCTCTGCAGATCAAA  
CCCAGTGGCAACCTCCACTGATCACAAGAAGAGAGGGAGGGAAAGCTGGTCATAGTCAAC  
CTGCAAGCAACCAAGCATGACAGACAGGCCGACCTGCGCATTTCATGCTTACGTGATGAT  
GTCATGACAAAACCTGATGAAGCACCTGGGACTGGAAAGTCCCAGAGTGGACAGGGCCAGTG  
GTGGTGGAAAGTGTGACTCTGCCAAGCCTGAACAGCTCTACACATTTAAGCCTGAGGTT  
CACGGGTTGCTCAAGGAAGAACCCTTTTCCAGCACAATGGAACAGCTGGGCAGTGCCCC  
GACCTTGGGACCACGCTGGTGGAGCACCATGATAGTCTGAAGCAGGAGTGTCCAAGTCTG  
GACACAGGACCACCACTGACAAAGAAGATGAAGGTAGAGCCTCTCCTCACC

>Zebra\_finch\_SIRT6

ATGGGAAAAGCAATTTTTGACCCTCCGGAGGAGCTGGAGCGGAAGGTGCAGGAGCTGGCA

GAGCTGATCCGGAGCTCCTCCCATGTGGTGTCCACACGGGGGCAGGGATCAGCACGGCC  
TCGGGCATCCCTGACTTCAGGGGCCCAATGGTGTCTGGACTATGGAAGAAAAGGGGCTC  
TCCCCAAAATTGACACACCACCTTCGAGAATGCCAGGCCCTCCAAGACTCACATGGCGCTG  
CTGGGGCTGCAGAGAGTGGGAATCCTGAAATCCTGGAGGGACAATCAGTGAAGCCCTT  
GAGGTTCTGGGGAGGAGGGGGGGTTCCCCAGGACTCCCCACCCTTCCCAGCTCACCT  
GTGCCTTTCTCCACAGGGACAAGTTGGCCGAGCTCCACGGGAACATGTTTGTGGAAGAG  
TGCCTGAAATGTGGGAAGCAGTACGTGCGCGACGCCGTCGTGGGCAGCATGGGGCTCAAG  
CCCACCGGCCGCTCTGCAGCGTCACCAAGGCCCGGGGGCTGCGGGCCTGCAGAGGGAAG  
TTACGAGACACTATTCTGGATTGGGAAGATTCCCTGCCTGACCGTGACCTGACGCTGGCA  
GATGAAGCCTGCAGGAAAGCTGATCTCTCCATCACCTGGGGACCTCTCTGCAGATCAAA  
CCCAGCGGGAACCTCCCACTGATCACCAAGAAGAGAGGAGGGAAGCTGGTCATTGTCAAC  
CTCAAGCAACCAACACGACCGCCAGGCCGACCTGCGCATCCACGGCTACGTGGACGAG  
GTGATGACCAAGCTGATGAAGCACCTGGGGCTGGAGGTGCCGAGTGGACGGGGCCGGTG  
GTGGTGGAGAGCGCCGAGCTGGCCAAGGGCGAGCAGCTGCAGGGGCGGCTGAAGGAGGAG  
TCCCTGGGCCAGCACACGGCACGGGAGCGCCGGGTGCCGGAAGGCGCCGCTGGAGCGC  
CGTATGGGCTCAAGCAGGAGTGTCCAGCCCGACACGGGGCCAACGCCGGTGAAGAAG  
ATGAAGGTGGAGCCTCTCCTCACC

>Zebrafish\_SIRT6

ATGTCGGTGAATTACGCCGAGGACTGTCTCCATACGCGGATAAAGGTATCTGCGGTCTG  
CCGGAGACATTCGACAGTCTGAGGAGCTGAAGACTAAAGTGGAGACTCTGGCCAGTGG  
ATCAGAGAGTCTCAGTACATGGTGGTTCATTACAGGAGCTGGAATCAGTACGTCTACAGGC  
ATACCCGACTTCAGAGGTCTAATGGTGTGTGGACGATGGAAGAGAGAGGGGAGACTCCA  
CACTTTAACACCACGTTTGTAGGACGCTCGACCCAGCCTGACTCACATGGCTCTGCTGCAG  
ATGCAGAGGACAGGACACCTCAAATACCTCATCAGCCAAAACGTCGATGGCCTTCACGTA  
CGCTCTGGCTTCCCCAGGGATCGATTGTGCGGAGCTGCATGGGAACATGTTTGTGAAGAA  
TGTGAGAAGTGTGGCAAGCAATACGTTCCGGGACACGGTGGTCCGGAGTATGGGACTGAAG  
CCGACTGGAAGATACTGCGACGTCATGCGCTCCAGAGGACTACGATCCTGCAGAGGGAAG  
CTGATCAGCTCTATATTGGACTGGGAGGACTCTGCCCCGACAGAGACCTGAACAGAGCT  
GATGAGGCGAGCAGGCGAGCTGATCTGGCTTTGACACTGGGGACGTCTCTCAGATTA  
CCCAGCGGAGATCTGCCTCTTCTAACCAACGAACAGGAGGAAAAGTGGTTATAGTTAAC  
CTTCAGCCTACCAACATGACAAACACGCTCACCTGCGTATATACGGTTACGTGATGAT  
GTCATGGGTCAGCTCATGAAGCTGCTGGGATTGGACGTTCCGGAGTGGGCCGGGCAACC  
CTCTGCGAAGACTCGGGTGGAGATCTGGACATCCTGCCATACGGAGCCTGGAAGAAGGAA  
GTGAAGATCGAGCTGAAGATCGAGGAGAGTAATCACACCGTCTCAAAGAAAACGCAAGAGG  
AAAGAGCAGCACGCTGAGGAGGGCTACAAGAATGGTGTAAAGTAGAAGAAGAGATGAAA  
GAAGAGGGAAAGGAAAGTGACTCTCACGTACACACACACT

>Great\_tit\_FOXO3a

ATGGTCCGCTGCGTGCCCTACTTCAAGGACAAGGGCGACAGCAACAGCTCGGCCGGGTGG  
AAGAATTCGATCCGGCACAACCTTGTGCTCCACAGCCGATTTGTCAGGGTGCAGAATGAA  
GGCACCGGAAAAGCTCTTGGTGGATGATCAATCCAGATGGTGGAAAAGGCGGCAAGGCG  
CCCCGAGACGCGCCGTGTCAATGGACAACAGCAACAAGTACACCAAGAGCAGAGGGCGA  
GCGGCAAAGAAAAAGGCAGCCCTGCAGACAGCCCAGGAGACGAGTGAGGATAGCCCTTCC  
CAGCTCTCAAAGTGGCCAGGGAGTCCCACCTCCCGCAGCAGCGATGAGCTGGATGCGTGG  
ACAGATTTTCGCTCCCGTACAAATTCAAACGCCAGTACGATCAGTGGCCGCTTGTACCA

ATTTTGGCAAGCACCGAGCTCGATGATGTTCAAGATGACGATGCTCCACTTTCTCCCATG  
TTGTACAGTAGTCCATCAAGCTTGCCCCATCGGTAAACAAACCATGTACTGTGGAGTTG  
CCTAGGTTGACTGATATGGCTGGGACAATGAACTTGAATGATGGTCTGACTGATAACCTC  
ATGGATGATCTTTGGACAATATAAACTCCCTTCCCTCCAGCAGTCACCCACAGGAGGG  
ATAATGCAGAGAAGCTCCAGTTTTCTTATGGTTCCAAAGGTTTCAGGGCTGGGCTCCCCG  
TCAAGTAGTTTCAACAACGCTGTGTTGGGCCGTATCCCTGAATTCCTCCGCCAGTCA  
CCCATGCAGACAATTCAGGAGAACAAGCAGGCCACCTTCTCTTCCATTTCTCATTACAAC  
AACCAGACGCTGCAGGATCTCCTCACCTCTGATGCGCTTAGTCACAGCGACGTCATGATG  
ACACAGTCTGACCCACTCATGTCACAAGCCAGCACAGCTGTGTCCGCCAGAATTCCCGC  
AGGAATATAATGCTCCGCAGCGACCCCATGATGTCGTTTGCCGCGCAGTCCAGCCAGGGC  
GGTCTGGTCAACCAGAACCTGTCCCATCACCAGCACCAGTCCCACAACCTCTCTTAGT  
GGCAGCCGTGCCTTGTCCAATTCATCAGTAACATAGGCTTGAGTACTCCAGCAGCTTG  
GGATCCACCAAACATCAGCAGTCACTGTCAATCAGTCTATGCAAACACTTTCTGACCCG  
CTGTCAGGCTCCTCTTTGACTCCTTAGCGTGAGCCTCCCGGTCATGGGACATGAGAAA  
TTCCCGAGTGACTTGACCTGGATATTTTCAATGGGAGCCTGGAGTGTGACATGGAGTCC  
ATTATCCGCAGTGAACCTATGGATGCCGATGGGCTGGATTTTAACTTTGATTCCCTCATC  
TCAGCTCAGAACGTTGTCAGTCTGAATGTGGGGAACTTCACTGGTGCTAAACAGGCTTCA  
TCACAGAGTTGGGTACCAGGC

>African\_ostrich\_FOXO3a

ATGCGAGGTGAAATAAATTTCTGCGCTCCTTAATTCAACACAAATGCAGCAGCAGTGGC  
CGTACAAATTCAATCCGGCACAACCTTGTCACTTACAGCCGATTCATCAGGGTGCAGAAC  
GAAGGCACTGGGAAAAGCTCTTGGTGGATGATCAATCCAGATGGTGGAAAAGGTGGGAAG  
GCACCGCAAGACGTGCTGTGTAATGGACAATAGCAACAAGTACACGAAGAGCAGAGGG  
CGGGCAGCTAAGAAAAAGGCAGCTCTGCAAACCTGCCAAGAGGCAAGTGAGGACAGCCCT  
TCTCAGCTCTCCAAGTGGCCCGGAGTCCAACCTTCTCGCAGCAGCGATGAGCTGGATGCA  
TGGACAGATTTCCGCTCCCGTACAAATCAAACGCCAGTACGATAAGTGGCCGCTTGTC  
CCAATTTTGGCAAGCACCGAAGTAGATGACGTTCAAGATGATGACGCTCCACTTTCTCCC  
ATGCTGTACAGTAGTCCATCGAGCTTGTCCCCATCAGTAAACAACCATGTAAGTGTGGAG  
TTACCTAGGTTGACTGATATGGCTGGGACAATGAATTTGAATGACGGACTGGCAGACAAC  
CTCATGGATGATCTCTTGGACAACATAAACTCCCTTCCCTCCAGCAGTCACCCACAGGA  
GGGATAATGCAGAGAAGCTCCAGTTTTCCATATGGTTCCAAAGGTTTCAGGGCTGGGTTCT  
CCGTCAAGTAGTTTCAATAACGCCGATTCGGGCCGTGTCCTGAACTCCCTTCGCCAG  
TCGCCCATGCAAACCAATTCAAGAGAACAAGCAGGCCACCTTCTCTTCCATTTCTCATTAT  
AACAAACCAGACGCTGCAGGATCTGCTCGCCTCTGATGCACTTAGTCACAGCGATGTCATG  
ATGACACAGTCTGACCCGCTCATGTGCGAAGCCAGCACAGCTGTGTCCGCCAGAATTCC  
CGCAGGAATATCATGCTCCGCAATGACCCCATGATGTCGTTTGCTGCGCAGTCCAACCAG  
GGCGGTCTGGTCAATCAGAGCCTGCCCATCACCAGCACCAGTCTCACAATTCCTCTCTT  
AGTGGCAGCCGTGCTTGTGCAATTCATCAGTAACATAGGCTTAAATGACTCAAACAGC  
TTGGGATCCACCAAACATCAGCAGTCACTGTCAATCAGTCTATGCAAACACTTTCTGAC  
CCACTCTCAGGCTCCTCTTTGTATTCTCTAGCGTGAACCTCCCGGTCATGGGACATGAG  
AAATCCCAAGTACTTGGACCTGGATATTTTCAATGGGAGCTTGGAGTGTGACATGGAG  
TCCATTATCCGCAGTGAACCTATGGATGCAGATGGGTTGGATTTTAACTTTGATTCCCTC  
ATCTCAGCCCAGAACGTTGTCAGTCTGAATGTGGGGAACTTCACTGGTGCTAAACAGGCT  
TCATCACAGAGTTGGGTACCAGGC

>Adelie\_penguin\_FOXO3a

ATGACCCTGTCTTCAGGCTTCGGTCTAATCCTGCAAACCTTTTTCTCCCGTGAAGAGTCC  
TGCAGAGGTCAGCCAGACTTCTTGCACGAACGGCGATTACTTGCTATTCAGCATCATGCT  
CGGATTACGCTTAAAGTGGCCAGTTCCTGCGTGCTGGTATGTTGTGCGCTCCCGTGTA  
TGGCACTGCTATGAAATGAAGAGGCAGCGTTTCGAACCGCCCCGTACTCCCGTTGCATTT  
CTGATTACATTGTTGGCTCTTGCAGCGGGAACCATTTGTTGGGGCCTGGAGCTGCAGAGC  
AGCTCGCCCGGCTGGAAGAATTTCGATCCGGCACAACCTGTCACTCCACAGCCGATTGCTC  
AGGGTGCAGAATGAAGGCACCGGAAAAGCTCTTGGTGGATGATCAATCCAGATGGTGGGA  
AAAGGCGCAAGGCGCCCCGGAGACGTGCTGTGTCGATGGACAACAGCAACAAGTACACG  
AAGAGCAGAGGGCGGGCGGCTAAGAAAAAGGCAGCCCTGCAGACCGCCAGGAGACGAGC  
GAGGACAGCCCTTCTCAGCTCTCAAGTGGCCAGGGAGTCCCACCTCCCGCAGCAGCGAT  
GAGCTGGATGCATGGACAGATTTTCGCTCCCGTACAAATCAAACGCCAGTACGATCAGT  
GGCCGCTTGTACCCATTTTGGCAAGCACGGAAC TAGATGATGTTCAAGATGACGACGCT  
CCACTTTCTCCATGCTATACAGTAGTCCATCGAGCTTGTCCCATCGGTAAACAAACCG  
TGTA CTGTGGAGTTGCCTAGGTTGACTGATATGGCTGGGACAATGAATTTGAACGATGGA  
CTGACAGATAACCTCATGGATGATCTTGGACAATATAACTCCCTCCCTCCAGCAG  
TCGCCCACAGGAGGGATAATGCAGAGAAGCTCCAGTTTTCCGTATGGTTCAAAGGTTCA  
GGGCTGGTTCCCATCAAGTAGTTTCAAACAACGCCGTGTTTGGGCCGTCATCCCTGAAT  
TCCCTCCGCCAGTACCCATGCAGACCATT CAGGAGAACAAGCAGGCCACCTTCTCTTCC  
ATTTCTCATTACAACAACCAGACGCTGCAGGATCTCCTTGCCTCTGATGCACTTAGTCAC  
AGCGATGTCATGATGACACAGTCTGACCCACTCATGTCACAAGCCAGCACAGCTGTGTCC  
GCCAGAATTCGCGCAGGAATATAATGCTCCGCAACGACCCCATGATGTCGTTTGCCGCG  
CAGTCCAGCCAGGGCGGTCTGGTCAATCAGAGCCTGCCTCATCACCAGCACCAGTCCCAC  
AACTCCTCTCTCAGTGGCAGCCGTGCCTTGTCCAATTCATCAGTAACATAGGCTTGAGT  
GACTCGAACAGCTTGGGATCCACCAAACATCAGCAGTCACCTGTCAATCAGTCTATGCAA  
ACACTTTCTGACCCGCTCTCAGGCTCCTCTTGTACTTCTTAGCGTGAACCTCCCGGTC  
ATGGGACACGAGAAATCCCAAGTACTTGGACCTGGATATTTTCAATGGGAGCTTGGAG  
TGTGACATGGAGTCCATTATCCG CAGTGA ACTCATGGATGCAGATGGGCTGGATTTTAAC  
TTTGATTCCCTCATCTCAGCTCAGAACGTTGTCAGTCTGAATGTGGGGA ACTTCACTGGT  
GCTAAACAGGCTTCATCACAGAGTTGGGTACCAGGC

>common\_starling\_FOXO3a

ATGGCAGAGGCGTCGCCCCCGCCCCGCTTTCGCCCTGGACGTGGAGCTGGACCCCGAG  
TTGAGCCG CAGAGCCGCCCCGCTCCTGCACCTGGCCCTGCAGAGGCCCGAGCTGCAG  
GCCAGCCAGCCAAGCCTGCCGGCAGTGCACCGCCGACGCCGCTCCATGATCCCGAG  
GAGGAGGACGACGAGGAGGAGGGGGCCGGCTCGGCCATGACCGTCGGCAGCGCGGCCCCC  
GCGGGCGGAGAAGCGGCGGGCGGCGGCGGCGGACCACCGCCGTGCCGAGGAGGCGGCGCGG  
CTGCTGGCCCNCCCCGCGCCTCTCGCCGGGGGAGCGGCGGCGGCGGCGGCGGCGGCGG  
GGGGGGCTGAGCGGGGGCCCCGCGGCGGCGGCGGAGGAAGTCTGTCGCGGCGCAACGCG  
TGGGGCAACCTCTCTACGCCGACCTCATCACCCGCGCCATCGAGAGCTCCCGGAGAAG  
CGCCTCACTCTCTCCAGATCTACGACTGGATGGTCCGCTGCGTGCCCTACTTCAAGGAC  
AAGGGCGACAGCAACAGCTCGGCCGGTGAAGAATTCCATCCGGCACA ACTTGTCACTC  
CACAGCCGATTCGTCAGGGTGCAGAATGAAGGCACCGGGAAAAGCTCTTGGTGGATGATC  
AATCCAGATGGTGGAAAAGGCGGCAAGGCGCCCCGGAGACGCGCTGTGTCAATGGACAAC  
AGCAACAAGTACACCAAGAGCAGGGGGCGGGCAGCAAAGAAAAAGGCAGCCCTGCAGACA

GCCCAGGAGACGAGTGAGGACAGCCCTTCCCAGCTCTCCAAGTGGCCAGGGAGTCCCACC  
TCCCGCAGCAGTGACGAGCTGGATGCATGGACAGATTTTCGCTCCCGTACAAATTCAAAT  
GCCAGTACAATCAGTGGCCGCTTGTACCAATTTTGGCAAGCACAGAGCTCGATGATGTT  
CAAGATGACGATGCTCCACTCTCTCCCATGCTGTACAGTAGTCCATCGAGCTTGTCCCCG  
TCGGTAAACAAACCATGTAAGTGTGGAGTTGCCTAGGTTGACTGATATGGCTGGGACAATG  
AACTTGAATGATGGACTGACTGATAACCTCATGGATGATCTCTTGGACAATATAAACTC  
CCTCCCTCCCAGCAGTCAACCCACAGGAGGGATGATGCAGAGAAGCTCCAGTTTTCTTAT  
GGTTCCAAAGGTTTCAGGGCTGGGCTCCCCATCAAGCAGTTTCAACAACGCTGTGTTTGGG  
CCGTGCTCCCTGAATTCCTCCGCCAGTCAACCATGCAGACAATTCAGGAGAACAAGCAG  
GCCACCTTCTTCCATTTCTCATTACAACAACCCAGACGCTGCAGGATCTCCTCACCTCT  
GACGCACTTAGTCACAGCGATGTCATGATGACACAGTCTGACCCACTCATGTCACAAGCC  
AGCACAGCTGTGTCCGCCAGAATTCGCCAGGAATATAATGCTCCGCAACGACCCCATG  
ATGTCGTTTGTCTCAGTCCAGCCAGGGCGGTCTGGTCAATCAGAACCTGTCCCATCAC  
CAGCACCAGTCCCACAACCTCTCTCAGTGGCAGCCGTGCCTTGTCCAGTTCCATCAGT  
AACATAGGCTTGAGTGAAGTCAACAGCTTGGGATCCACCAACATCAGCAGTCACTGTGTC  
AATCAGTCTATGCAAACTTTCTGACCCGCTGTGACGGCTCCTTTGTACTCTAGCGTG  
AACCTCCCTGTGATGGACATGAGAAATTCCCGAGTGAAGTGGACCTGGACATTTTCAAC  
GGGAGCCTGGAGTGTGACATGGAGTCCATTATCCGCAGTGAAGTCAAGGATGCCGATGGG  
CTGGATTTAACTTTGATTCCCTCATCTCAGCTCAGAACGTTGTCAGTCTGAATGTGGGG  
AACTTCACTGGTGTAACAGGCTTCATCACAGAGTTGGGTACCAGGC

>central\_bearheaded\_dragon\_FOXO3a

ATGGCAGAGGCGTCTCCCCCGCCCCCTCGTCCCCCTCGAGGTGGAAGTGGACCCCGAA  
TTTGAGCCCCAGAGCCCGCCGCGCTCTGTACGTGGCCCTGCAGAGGCCCGAGCTGCAG  
GCAAGCCCGCCAAGCCCGCCGGGAAGCGCCTGCCGACGCCACCTCCATGATCCCGGAG  
GAGGACGACGACGCGGACGACGAGGAGCAAGGGGGCAGCTCGGCCATGACCGTCGCCGT  
CGGAGTGGCGCGCCCGCGGCGGCGACGCCGAGGCTTTGGCCCGGTGCTGGCTCCTTTC  
TCCGGGCTTGCAGGCGAGGGAGCCGGCCAGGGCGCCAGGGGGCGCTGGGCGGCGGGCAG  
CAGCAACCACAACAACAACAGGGGCGACGGGCACGGGGACCGCCCCGCGCAAATGCTCG  
TCCCGGAGGAACGCGTGGGGGAAGTGTCTTACGCGGACTTGATCACTCGCGCCATCGAG  
AGCTCGCCGGAGAAGCGCTCACCTGTCCCAGATCTACGAGTGGATGGTGCCTGCGTG  
CCCTACTTCAAGGATAAGGGCGACAGCAACAGCTCCGCAGGCTGGAAGAATTCGATCCGG  
CACAACCTGTCCCTCATAGTTCGATTCATCAGGGTACAGAATGAAGGAACTGGGAAAAGC  
TCATGGTGGATGATCAATCCAGACGGTGGGAAAGGTGGGAAGGCACCACGGAGGCGGGCA  
GTTTCAATGGACAACAGCAACAAGTACACAAAGAGCCGAGGGCGAGCGGCTAAGAAGAAA  
GCGGCCCTGCAAGCAGCACAAGACACAAGCGAAGACAGCCCCACCAACTCTCCAAGTGG  
CCTGGCAGCCCAACATCACGAAGCAGCGATGAGCTCGAAGCGTGGACAGATTTCCGGTCC  
CGGACAAACTCCAACGCCAGTACAATAAGTGGCCGCTTGTGCGCCATTTTGGCAACCAG  
GAGCTCGATGAGGCTCAGGATGATGACGCTCCCTTTCCCAATGCTGTACAGTAGCCCA  
CCTAGCATGTCCCATCAGTAAACAACCCTGTAATGTAGAGTGCAGGACTGACTGAT  
ATGGCAGGCACCATGAAGTGAACGATGGCCCTGACAGATAACCTAATGGATGATCTTCTG  
GACAATATAACTCTCCCCGCTTCCCAGCAGTCTCCACGGGGGACTCATGCAAAGAAGC  
TCGAGTTTTCCCTACAGTTCCAAAGGGTCAGGCCTTGGTTCCCGTCGAGTAGTTTCAAT  
AACGCCGTGTTCCGGGCGTCTCTGAATTCCTCCGACAGTCTCCCATGCAAACCATC  
CAAGAGAACAAGCAAGCGACGTTTTCTTCCATGTCTCACTATAATAACCAAACTTGCAG

GATCTGCTGGCATCGGATTTCGCACAGCCACAGTGACGTCATGATGACTCAGTCCGATCCG  
CTTATGTCGCAAGCCAGCACGGCGGTGTCTGCCAAAACGTACGCAGGAATATTATGCTA  
CGGAATGATCCAATGATGTCCTTTGCTGCCAGCCAAGCCAGGGCAGTTTGGCCAACCG  
AATCTGCTCCACCACCAGCATCCACCCAGAACTCCTCCCTCAGCGGCAGCCGTGCCTTG  
TCCAATCCGTCCGTAATGACTATGGGCTTAAGTGACTCAAACAACGTTGGGTCGGCAAAACAC  
CAGCAACAGTCACCTGCCAACCAGTCTATGCAATCACTCTCTGACTCGCTCTCAGGCTCT  
TCTTTGTATTCCAACAGCGTGAGCCTCCCGATGATGGGGCAAGATAAATTCCCCACTGAT  
TTGGACCTGGATATTTTCAACGGGAGCTTGAATGCGATATGGAGTCCATTATCCGCAGT  
GAACTCATGGATGCAGATGGGTTGGATTTAACTTTGATTCCCTCATCTCAGCCCAGAAT  
GTGGTCACTCTGAATGTGGGAACTTCGCTGGTGCTAAGCAAGCGTCATCACAGAGTTGG  
GTTCCAGGC

>Gecko\_FOXO3a

ATGATCAACCCAGACGGTGGGAAAGGTGGGAAAGCACCACGGAGGCGTGCTGTTTCAATG  
GACAACAGCAACAAGTACACGAAAAGCAGAGGACGAGCGGCTAAGAAAAAGGCTGCTCTT  
CAAGCTGCCAGGAACTACTGAAGACAGCCCCTCCAGCTCTCAAATGGCCAGGCAGC  
CCAACCTCACGTAGCAGTGATGAGCTGGATGCATGGACGGATTTCCGGTCTCGTACAAAC  
TCAAATGCCAGCACAATAAGTGCCGCTTGTACCAATATTGGCAAGTACTGAGTTAGAT  
GAGGTCCAGGATGATGATGCTCCACTATACCCATGCTGTACGGTAGCCACCCAGCATG  
TCCCCATCGGTAAATAAACCTGTAATGTTGAGCTGCCTAGGTTGACTGATATGGCTGGC  
ACCATGAACTTGAATGATGGCCTGACAGATAATCTTATGGATGACCTTCTGGATAATATC  
ACACTCCCCTCTCCAGCAATCACCCACAGGAGGACTCATGCAAAGAAGCTCAAGTTTTT  
CCTTATGGATCCAAAGGTTCCAGGTCTTGGTTCTCCATCAAGCAGTTTCAATAATGCTGTG  
TTTGGACCTTCATCTCTGAATCCCTCCGTCAGTCTCCCATGCAAACCATCCAAGAGAAC  
AAGCAAGCTACATTTTCTTCATGTCTACTACAACAACCAAACGCTGCAGGATCTGCTA  
GCATCGGATTTCGCTGAGCCACAGCGATGTCATGATGACTCAGTCTGATCCACTCATGTCA  
CAAGCTAGCACAGCTGTGTCTGCCAAAATGTACGCAGGAGCATTATGCTCCGGAACGAC  
CCAATGATGTCAATTTGCTGCTCAGCCAAGCCAGGGCAGTTTGGTCAATCAGAACCTGCTC  
CACCACCAGCATCAGTCCAGAATTCTTCTCAGTGGCAGCTGTGCCTTGTCAAATTCC  
ATTGGTACTATAGGCTTAAGTGACACAAACAACGTAGGGTCGGCCAAACACCAGCAACAG  
TCACCTGTCAGCCAGTCTATGCAATCACTTTCTGACTCACTCTCAGGCTCTTTATATTCC  
AACAGTGTGAGCCTTCCAGTCATGGGGCATGATAAATCCCCAGTGATTTGGACCTAGAT  
ATTTTCAATGGGAGCCTGGAGTGTGACATGGAGTCCATTATCCGCAGCGAACTCATGGAT  
GCAGATGGTTTGGATTTAACTTTGATTCCCTCATCTCTGCCAGAATGTTGCACTCTG  
AATGTGGGAACTTCACTGGTGCTAAGCAAGCTTCATCACAGAGTTGGGTTCCAGGC

>Taiwan\_habu\_FOXO3a

ATGGGTGGTCAGGCCATTGGCAAGAGCAATGCATCTGAGCGGAAAGCGGCCTCGGAACAA  
GTGGGGCAGAACTCAATCAGACACAACCTTGTCCCTTACAGTCGATTCATCAGGGTACAG  
AATGAAGGAACTGGGAAAAGCTCGTGGTGGATGATCAACCCGATGGTGGGAAAGGAGGG  
AAAGCACCCCGCAGACGTGCGGTATCAATGGACAACAGCAACAAATACACAAAGAGCCGA  
GGACGAGCAGTAAGAAAAAGCAGCCCTCCAAGTTGCACAGGAGACAAGTGTGACAGC  
CCC GCCAGCTATCCAAGTGGCCTGGTAGCCCAACCTCCCGTAGCAGTGACGAACTGGAT  
GCATGGACAGATTTCCGGTCTCGTACCAACTCGAATGCCAGTACAATAAGTGGCCGCTTG  
TCCCAATATTGGCAAGTACTGAGCTAGATGAGGTGCAGGACGACGATGCTCCACTTTCT  
CCCATGTTGTACAGTAGCTCACCCAGCATGTCCCGTCAGTGAGCAAGCCCTGTAATGTT

GAGCTGCCTAGGTTGACTGACATGGCAGGCACGATGAACTTGAATGATGGCTTGACAGAT  
AACCTTATGGATGACCTCCTGGACAATATAACCCTTCCCTCTTCCCAGCAGTCACCCCCA  
GGAGGACTCATGCAGAGAAGCTCAAGCTTTCATACGGCTCCAAAGTTTCAGGGCTTGGT  
TCTCCATCCAGTAGTTTCAACAATGCTGTGTTGGACCATCATCGCTGAATTGTCTCCGT  
CAGTCTCCCATGCAAACCATCCAAGAGAACAAGCAAGCTACATTTTCTTCCATTTCCGCAC  
TACAATAACCAAACCTCTGCAGGATCTGCTGGCATCAGATTACATAGCCACAGTGATGTC  
ATGATGACTCAGTCTGATCCGCTCATGTCACAAGCTAGCACTGCTGTGTCTGCCAAAAC  
GCACGCAGGAATATTATGCTTCGGAACGATCCGATGATGTCATTTGCTGCTCAACCAAGT  
CAGAGCAGTTTGACCAATCAGAATCTGCTCCACCACCAGCATCAATCCCAGAATTCCTCT  
CTCAGTGGCAGCCGTGCCTTGTCAAATTCTGCCGGTACTATGGGCTTAAGTGACACCAAC  
ATTGGATCAGCAAAACACCAGCAACAGCCACCTGCCAACAGTCTATGCAATCACTTTCT  
GACTCCCTATCGGGCTCTTCTTTGTATTCCAACAGTGTGAGCCTTCCAGTCATGGGGCAC  
GATAAATTCGCCAGTGATTTGGATCTGGATATTTCAACGGGAGCTTGAATGCGACATG  
GAGTCCATTATCCGCAGTGAACCTCATGGATGCAGATGGATTGGATTTAATTTGATTCC  
CTCATCTCAGCCCAGAACGTTGTTACTGAATGTGGGAACTTCACTGGTGCTAAGCAA  
GCTTCATCACAGAGTTGGGTTCCAGGC

>green\_sea\_turtle\_FOXO3a

ATGGGGTGGGAATGGGTCTCTTTCTTGCTTGCATTTTTCTTGCTCTGTGAAGATGTTT  
ACTCTAATAGGCAGTGGCACCCCTCTGGCTTTTGCTCTCTACACAACCTCATAACGGTCTG  
CTGATACAGAGTCTTTGTAACCTCAATCCGGCATAATTTGTCACTTACAGTCCGATTCATC  
AGGGTACAGAATGAAGGAACTGGGAAAAGCTCTTGGTGGATGATTAATCCAGATGGTGGGA  
AAAGGTGGGAAGCCTCCCCGGAGACGTGCTGTTTCAATGGACAATAGCAACAAGTACACA  
AAGAGCAGAGGCCGAGCAGCTAAGAAAAAGGCAGCCCTGCAAGCTGCACAAGAAGCTAGC  
GAGGACAGCCCATCTCAGCTTCCAAGTGGCCGGGAGCCCAACTCCCGCAGCAGTGAT  
GAGCTGGATGCTTGGACAGATTTCCGCTCTCGTACAAATTCAAATGCCAGTACAATAAGT  
GGCCGTTTGTACCCGATATTGGCGAGTACCGAACTCGATGACGTTCCAGGATGATGATGCT  
CCACTTTCTCAATGCTGTACAATAGTCCATCAAGCATGTCCCATCGGTAAATAAACCA  
TGTAAGTGTGAGTTGCCGAGTTGACTGATATGGCAGGCACAATGAACTTGAATGATGGA  
CTGACAGATAACCTCATCATGGATGATCTTTGGACAATATAACGCTCCCCTCTCCCCAA  
CAGTACCATCAGGGGGGCTCATGCAAAGAAGCTCCAGTTTTCCGTATGGTTCCAAAGGT  
TCCGGACTTGGTTCTCATCAAGTAATTTCAACAGTGTGTGTTGGACCATCATCTCTG  
AATTCTCTTCGTAGTCTCCATGCAAACCATTCAAGAGAACAAGCAAGCTACCTTTTCT  
TCCATTTCTATTATAACAACCAGACGCTGCAGGATCTGCTGGCATCTGACTCACTTAGT  
CACAGTGATGTCATGATGACGCAGTCTGATCCACTCATGTCTCAAGCCAGCACAGCTGTG  
TCTGCCAGAAATCACGCAGGAGTATCATGCTTCGTAGTGATCCAATGATGTCATTTGCT  
GCTCAGTCCAACCAGGGAAGTTTGGTAAATCAGAACCTGCTCCACCACCAGCATCAATCT  
CAGAATCTTCTTGGTGGCAGTCGTGCCTTGTCAAATTCATCAGTAACATGGGCTTA  
AATGATACGAACAACCTGGGGTCGGCCAAACACCAGCAGCAGTCACCTGTCAATCAGTCT  
ATGCAAACACTTTCTGACTCGCTCTCAGGCTCTTCTTTGTATTCCACTAGTGTGAACCTT  
CCAGTCATGGGGCATGATAAATTCCTAAGTGAATTTGGACCTGGATATTTCAATGGAAGC  
TTGGAATGTGACATGGAGTCCATTATCCGCAGTGAACCTCATGGATGCAGATGGGTTGGAT  
TTAACTTCGATTCCCTCATCTCAGCTCAGAACGTTGTGAGTCTGAATGTGGGGAGCTTC  
ACTGGTGCTAAGCAGGCTTCGTACAGAGTTGGGTGCCAGGC

>Chinese\_alligator\_FOXO3a



ATGGATGGGCTTCGCAAGAACTCAATCCGGCATAACCTATCACTTCATAGTCGATTCATC  
AGGGTGCAGAAATGAAGGAACCGGGAAAAGCTCTTGGTGGATGATCAACCCAGATGGTGGG  
AAAGGAGGGAAGGCCCAAGGAGACGTGCTGTTTCCATGGACAATAGCAACAAGTACACT  
AAGAGCAGGGGGCGAGCAGCTAAGAAGAAGGCAACCCAACAAGCCGCACAAGAAGTGAGT  
GATGACAGCCCTTCTCAGCTTTCCAAGTGGCCAGGGAGCCCAACATCCCGTAGCAGCGAT  
GAGTTGGATGCCTGGACAGATTTTCGATCTCGTACAAATTCAAATGCCAGTACGATAAGT  
GGCCGCTTGTACCCATATTGGCAAGTACTGAACTGGATGATGTTTCAGGATGATGATGCT  
CCACTGTCCCAATGCTGTACAATAGTCCATCAAGCTTGTCCCATCAGTAAATAAGCCG  
TGTACAGTTGAGTTGCCTCGGCTAACCGATATGGCAGGCACAATGAACTTAAACGATGGA  
CTGACGGATAATCTCATGGATGATCTTTGGATAATATAACGCTCCCCTCTCCAGCAG  
TCACCTTCTGGGGGGCTGATGCAAAGAAGCTCAAGTTTTCCGATGGCTCCAAAGGTTCC  
GGTCTTGGTTCTCCATCCAGTAGTTTCAACAATGCTGTGTTTGGACCATCCTCTCTGAAT  
TCCCTCCGCCAGTCTCCATGCAAACATAACAAGAGAACAAGCAAGCTACCTTTTCCCTCC  
ATTTCTCATTACAACAACCAGACGCTTCAGGACCTGCTGGCATCTGATTCGCCTAGTCAC  
AGTGATGTCATGATGACGCAGTCGGATCCGCTCATGTACAAGCCAGCACTGCTGTGTCT  
GCCAAAACCTACGCAGGAATATAATGCTTCGTAATGACCCAATGATGTCATTTGCTGCT  
CAGTCCAGCCAGGGAAGTTTGGTCAGTCAAACCTGCTCCACCACCAGCATCCATCTCCG  
AATTCTCCTTAGTGGCAGCCGTGCCTTGTGCAATTCAGTCAGTAACATGGGCTTAAAT  
GACACGAACAGCTTGGGGTCAGCCAAACACCAGCAGCAGTCACCTGTCAATCAGTCTATG  
CAAACACTTTCTGATTCACTCTCAGGCTCTTCTTTGTATTCTGCTGGTGTGAACCTCCA  
GTCATGGGACATGATAAATCCCAAGTATTGGACCTGGATATTTTCAATGGGAGCTTG  
GAATGTGACATGGAGTCCATTATCCGCAGTGAGCTCATGGATGCAGACGGGTTGGATTTT  
AATTTGATTCCCTCATCTCAGCTCAGAACGTTGCTCACTTAAATGTGGGGAACTTCACT  
GGTGCTAAACAGGCTTCATCACAGAGTTGGGTGCCTGGC

>Gharial\_FOXO3a

ATGGCAGAGGGCTCGCCGCCGCGCCCCGTCACCACTGGACGTGGAGCTGGACCCGGAG  
TTGAGCCCCAGAGCCGGCCGCTCCTGCACTTGGCCGCTGCAGAGGCCCGAGCTGCAA  
GGCAGCCCGCCAAGCCCGCGGGGGAGGCGCCGCGACGCCCTCAGGGCCGGGGGCC  
GCCGCCCTCCTCCTCGGCCCGCGCAAGTGCTCGTCGCGCGCAACGCGTGGGGCAAC  
CTGTGCTACGCCGACCTGATCACCCGCGCCATCGAGAGCGCCCCGACAAGCGCCTCACG  
CTCTCGCAGATCTACGACTGGATGGTGCCTGCGTGCCTACTTCAAGGATAAGGGCGAC  
AGCAACAGCTCGGCCGGCTGGAAGAATTCAATCCGGCATAACCTATCACTTCATAGTCGA  
TTCATCAGAGTGCAGAATGAAGGAACCGGGAAAAGCTCTTGGTGGATGATCAACCCAGAT  
GGTGGGAAAGGAGGCAAGGCCCAAGGAGACGTGCTGTTTCCATGGACAATAGCAACAAG  
TACACTAAGAGCAGGGGGCGGGCCGCTAAGAAGAAGGCAACTCAACAAGCCGCACAAGAA  
GTGAGTGATGACAGCCCTTCTCAGCTTTCCAAGTGGCCAGGGAGCCCAACATCCCGTAGC  
AGTGATGAGTTGGATGCCTGGACAGATTTCCGATCTCGTACAAATTCAAATGCTAGTACG  
ATAAGTGGCCGCTTGTACCCATATTGGCAAGTACTGAACTGGATGATGTTTCAGGATGAT  
GACGCTCCACTTCCCAATGCTGTACAGTAGTCCATCGAGCTTGTCCCATCAGTAAAT  
AAGCCGTGTAAGTTGAGTTGCCTCGGCTAACCGATATGGCAGGCACAATGAACTTAAAC  
GATGGACTGACAGATAATCTCATGGATGATCTTCTGGACAATATAACGCTCCCCTCTCC  
CAGCAGTCACCTTCTGGGGGGCTGATGCAAAGAAGCTCCAGTTTTCCATATGGCTCCAAA  
GGTTCCGGTCTTGGTTCTCCATCCAGTAGTTTCAACAATGCTGTGTTTGGACCATCCTCT  
CTGAATCCCTCCGCCAGTCTCCATGCAAACATAACAAGAGAACAAGCAAGCTACCTTT

TCCTCCATTTCTCATTACAACAACCAGACACTTCAGGACCTGCTGGCATCTGATTCACCT  
AGTCACAGTGATGTCATGATGACGCAGTCAGATCCGCTCATGTCACAAGCCAGTACTGCT  
GTGTCTGCCAAAGCTCACGCAGGAATATAATGCTTCGTAATGACCCAATGATGTCATTT  
GCTGCTCAGTCCAGCCAGGGAAGTTTGGTCAATCAGAACCTGCTCCACCACCAGCATCCA  
TCTCCAAATTCTCCTCTTAGTGGCAGTCGTGCCTTGTGCAATTCAGTCAGTAACATGGGC  
TTAAATGACACGAACAGCTTGGGGTCAGCCAAACACCAGCAGCAGTCACCTGTCAATCAG  
TCTATGCAAACACTTTCTGATCACTCTCAGGCTCTTCTTTGATTCTGCTGGTGTGAAC  
CTTCCAGTCATGGGACATGATAAATCCCAAGTGATTTGGACCTGGATATTTTCAATGGG  
AGCTTGGAAATGTGACATGGACTCCATTATCCGCAGTGAGCTCATGGATGCAGACGGGTTG  
GATTTTAAATTTGATTCCTCATCTCAGCTCAGAACGTTGTCACTCTAAATGTGGGGAAC  
TTCAGTGGTGCTAAACAGGCTTCATCACAGAGTTGGGTGCCTGGC

>African\_clawed\_frog\_FOXO3a

ATGGCAGAAGCACTGCCTCCCCGCTCCCCGCTGACGACGTGGACATAGACCCGGACTTC  
GGGCCGAGAGTCGACCTCGGTCTTGCACGTGGCCCCTGCAGAGACTAGACTCCAAGGC  
AGCCCCGGCAAGCCGAATAGTGGCGCTGGGGAAGCCGCAGACACGTCCTCTATGATCCCG  
GAGGAGGAGGATGATGACTATGAGGGAGCTGCTAGTACAGCCACTGTGCTGGGGACAGCG  
GGGACAAGGGCACGTTGGTGTCTGAGCGGCGGAGAATCGGGACAACCTGGCCGTGCTG  
GCGTACCTGTTGGGGGGGTGAAACGCTGCAGTTTCGCTCGGGGGTGAAGGAGCAGGG  
GGCGCCGTGAGCGGTGCAGGAGGACAGCAGCAGCAGAGGAAATGTTTCATCCCGCAGAAAT  
GCCTGGGGCAACATGTCTACGCTGACCTTATCACTAGGGCCATCGAGAGCACCCAGGAT  
AAACGGCTCACCTGTCCCAGATCTATGATTGGATGGTCCGCTCCGTGCCCTACTTCAAG  
GATAAGGGAGACAGCAACAGCTCTGCAGGCTGGAAGAATTCAATCCGGCATAATCTGTCA  
CTACATAGCAGGTTTATTAGAGTTCAGAATGAGGGCTCTGGAAAAAGCTCTTGGTGGATG  
ATCAACCCAGAGGGTGGTAAAGGTGGAAGGCACCAAGAAGACGTGCTGTTTCAATGGAC  
AATAGTAACAAGTACACCAAGAGTCGCGGGAGAGCAGCAAAGAAAAAAGCATCCTTGCAG  
GCATCTTCTGATGCTACAGATGATAGCCCTTCACAGCTGTCAAAGTGGCCAGGTAGTCCC  
ACCTCACGTAGTAGTATAAACTTGATACCTGGACAGACTTTTCGATCTCGTACAAACTCT  
AATGCCAGTACTATAAGTGGTCGGTTGTCTCCAATTCCAGCTACCACTGAACTTGATGAT  
GTTCAAGATGATGATTCTCCCCTGTCCCCTATGTTGTATAACAGCCCAGGTAGTTTGCC  
CCATCCATAAGTAAACCATGCACAGTGGAGATGCCAAGAATAACTGATATGGCTGAAACC  
ATGAACTTAAATGACGGATTGCCGGAGAACCTCATGGATGACTTGCTGGATGACATTTCT  
CTCACTTCTTACAGCAATCATCTCCCGGTGTCCTCATGCAGAGAAGTTCAGCTTTACA  
TATGGCACTAAGGGCTCAGGCATTGGCTCTCCATCGAATAATTTTAAACAACACTGGTAGC  
TTCAACTTCCCTTGACATCTCTACGCCAGTCTCCCATGCAAACGATCCAAGAGAACAAA  
CAAGCTACATTTTCTTCCATGAATCATTATAGTAACCAGTCTTTGCAAGACCTGTTGAAT  
ACAGACACCCTCAGCCACAGCGATGTGTTAATGACCCAGTCTGATCCGCTCATGTCACAA  
GCCAGTACTGCAGTAACTGCTCAGAATAGCAGAAGAAATATCATTCTGAGAAATGATCCT  
ATGATGTCTTTTGCAGCCCAACCTAACCAAGGAGGAACTTGGTTAATCAAAAACCTCGCTG  
CACCAGCAGCAGTCTTAACTCTTTTCAAGGTGGCAGCCGTGCCTTGTCAAACAATTTA  
AGCAACACTGGTTTAAATGACAGCAGCATCTTGAATCAACCAAACACCAGCAGCAGTCC  
TCAGTGAGTCATTCTATGCAAACCATCTCCGACACGCTCTCAGGATCCTTGACTCCTCA  
GGCGTGACCCTTCAACACTGGGACATGAAAAGTTTCCCACTGATTTGGACCTGGATATT  
TTCAATGGGAGTTTGAATGTGATATGGAGACGATAATTCGCAACGATCTCATGGATGCA  
GATGGGTTGGATTTTAAATTTTACACCCTCATCTCAGCTCAGAATGTCAGTCTATCTGTA

GGCAGTTTCACTGGTGCTAAGCAGACATCATCACAGAGCTGGGTGCCAGGC

>Tibetan\_frog\_FOXO3a

ATGGCAGAAGCTGACCCCCGGTGTCCCCTGCCGGGAACGTGGAGATAGACCCGGACTTT  
GAGCCGAGAGCCGGCCCAGATCGTGACATGGCCCCTGCAGAGACTGGACTCCCAAGCC  
AGCCCCGCCAAGCCCCGGTGTAGGCGGGGAGCCGGGGGACGCAGCCATTGAGAGCTCCCCG  
GACAAGAGGCTCACCTGTCCCAGATCTATGACTGGATGGTCCGCTCCGTGCCCTACTTC  
AAGGACAAGGGGGACAGCAACAGCTCTGCGGGGTGGAAGAATTCAATTCGACATAATTTG  
TCCCTGCACAGCAGATTTATTTCGAGTACAAAACGAGGGCACTGGAAAAAGCTCTTGGTGG  
ATGATTAATCCAGAAGGAGGGAAAGGTGGGAAGGCACCTAGAAGACGTGCCGTGTCAATG  
GACAACAGCAACAAATACACTAAGAGCCGTGGAAGAGCAGCAAAGAAAAAAGCATCAATG  
CAGGTGACCCAGGATGCTGCAGATGATAGCCCATCGCAACTCAAATGGCCAGGAAGCCCA  
ACATCGCGTAGCAGTGATGAGTTGGATGCTTGGACAGATTTCCGCTCCCGTACGAACTCG  
AACGCCAGCACGATAAGTGGTCGTTTATCTCCAATTCCAGCAACAACCTGAGCTTGATGAT  
GTTCCAGGATGATGATTCACCTATTTCCCAATGCTGTATAGCCCTGGCAGTATGTCTCCA  
TCCATAACAAAACCATCCACAGTGGAGTTGCTGGGATAACAGATATGACTGGAACCATG  
AACTTAAATGATGGTCTAACAGAGAATCTTATTGATGATTTTCTGGAGGACATTTCTCTT  
ACGCCATCTCAGCAGTCTCCTAGTGTGGTGGCATGCAGAGAAGTTCAGCTTTACC  
TATGGCACTAAGGGCTCAAGCCTTGGCTCTCCATCCAGTAGCTTCAACAACACTAGTAGC  
TTCAATTTCCATTGACGTCTCTTCGTGCTCCTCAATGCAAACCATTCAAGAGAACAAA  
CAAGCAACATTTTCTTCCATGAACCATTATAGCAACCAGTCCATTCCAGGATATGCTGAAT  
ACTGATTCACCTAGCCATAGTGGCGTATTAATGACTCAGTCTGACCCCTCATGTCCCAA  
GCCAGTACTGCAGTCACTGCTCAGAATTCTCGTAGAAACATTATTCTGAGGAGTGACCCA  
ATGATGTCGTTTGCAGCCAGCCCAATCAAGGGGGGAAGCCTGGTTAATCAGAAGTGGTCT  
CACCACCAGCACCAGTCCCATAACTCATTCTTGGTGGCAGTCGTGCCTTGTCAAACAGC  
ATAAATAACATTGGATTAATGACAGCAACAACCTAGACTCGTCTAAACACCAGCAGCAG  
TCCTCAGTCACTCATTCTATGCAAGCCCTCTCAGACACACTCTCAGGACCCTTGACTCC  
ACAGGCATGAACCTTCCAGTGCATGAAAAGTCCCAACTGATTTGGACCTGAAAATTTTC  
AGTGGGAGCTTGAATGTGACATGGAGACTATCATTGCAATGAACTAATGGATGCAGAT  
GGGCTGGATTTAACTTTGATTCTTATCTCTGCTCAGAATGTCAGTCTTGCAGTGGGA  
AATTCACAGGTGCTAAGCAGACATCGTCCACAGAGTTGGGTACCGGGT

>southern\_platyfish\_FOXO3a

ATGGCCGAGGCTCCGCTCCCCGACACGCTCCCGGACTTGGACGTGGTCATTGACCCGGAC  
TTTGAGCCCCAGAAGCGGCCCGGTCTTGACCTGGCCGCTGCCGCGACCCGGACTCCAGC  
GCGGTGAAACCGGAGAGCACCGAGGCGGATATACATCCCGAGGAGGAGGATGACGAGGAG  
GACAGCGCAACCCCCACGGCAATCACTGTCAATGGCTCCGCTGCGGCGACGGAGGACCAG  
AGCAGTAACAGCCCCATTACCGACGGTGCCTTCCCCTCCCCGGCCATGACAGCGGAGGC  
TCCCCGCTCTCCACGCACTACCGACGGCCACCTCCGGCGCCCTGACTCCGAGCGGCTTG  
CCTGCAGCGCAGACCCCCGAGGAAGGCATCATCCCGCCGTAACGCCTGGGGCAACCTCTCC  
TACGCCGACCTGATCACCAAAGCCATCGAGAGCTCACCAGAGAAGAGACTGACTCTGTCC  
CAGATCTATGACTGGATGGTGGATCCATCCCCTACTTTAAGGACAAAGGCGACAGCAAC  
AGCTCTGCAGGATGGAAGAAGTCCATCCGGCACAACCTATCTCTCCACAGTCGTTTCATC  
CGTGTCCAGAATGAAGGGACAGGAAAGAGTTCGTGGTGGATGATCAACCCAGAGGGAGGA  
AAAGGAGGCAAGGCTCCACGGCGCCGGCCGTCTCCATGGATAACAGCAACAAGTACACC  
AAGTCTGCTCGTGGCCGTGCTGCTGCTAAGAAGAAGGCGCCCTGCAGGCTGTGGTCTGCT

GCAGCTGGGGAAGGCGGTGGAGACAGTCCTACAGGTCCTCTAAGTGGCCGGGAAGCCCG  
ACGTACGCAGCAGCGAGGAGCTGGATGCTTGGACAGACTTCCGCTCCCGAACAACTCT  
AATGCCAGCACGCTCAGCGGCCGCTCTCGCAATTTAGCGAATCCTGAGCTAGACGAG  
GTGGCTGACGATGAGCCTCCTCTCACCGATGATCTACTCCAGTCCTGGCAGGGCGTTG  
TCTCCAGGAAACACCAATGGGAAGGCTGTGCCACTGAGCTGCCTCGTCTGGCAGATCTG  
GCAAATACAATGAATCTAAATGATGGAATCACACAAGATCTGATGGATGATTTTCTGGAT  
AACATCAAGCTTGTACCAACCACCTGCAGCCAAGCCATGCAGAATGGTTCCTCAGGGTTT  
AGTTTTGGGTCCAAACCCAACGGGATAGGGTACCTTCTTCCACTTCATCTCCATCCTCT  
AACAACTCCTCTAATGGAGGAGGTAATAGCTACAGTAACTCCATCTTTAGCCCTTACACA  
GCAGGCTCCTCCCTACGTCCATCTCCCATGCAAACCATCCAGGAGAATAAGCAAACCTCA  
TTTTCCACAACCTGGCATGTCTCACTTTGGCAGCCATACTACAAGATCTTCTTAACTCT  
GACAGCCACAATCATAGTGATGTCATGATGACCCAGTCTGACCCCTTAATGTCACAGGCC  
AGTGCTGTTGCCATCATTTCCAGAACTCTCGTCGAAATGTTATGGTCCGTAATGATCCT  
GTTATGACTTTTGGGACCACCGGTGGACTCCAGAGTAGCCATAGGGAGACGCTCCAACT  
AACAAACCACAACCAGAGTACCGTGAGGTCTTTGAACGGAGATCTGAACCTTGCCAACGAG  
GCAAACACTTTGGCTAATGTCAAACAGCAACTTCTACTGTCAACCAATTGGTGGAAATGGA  
ACATCCTCATGCAAATTGACACCTCCATCTTTCTAAATGGTACAGCAAGCAGCAGCGGC  
GGGTGTCAGGACCGCTTCCCAACAGACTTGGACCTGGACATGTTCAACAGTGGCAGCTTG  
GATTGTGACATGGAGTCCATCATTAGGAATGATCTGATGGATGCTGATGGTCTGGATTTT  
AATTTGAGTCACTGGCCAACATGAATGGAGTCAGCAACTTACAAGCACCAAGCACAGC  
TGGGTGCCTGGT

>spotted\_gar\_FOXO3a

ATGGCAGAAGCACCTCCCCCTGACCCTCTTTCCCGCTGGACGTTGAGATAGACCCTGAT  
TTCGAGCCACAGAAGAGGCCAAGGTCTGCACCTGGCCTTACCCCGACCTGACCTGCAG  
TCCAATGTGGAGAAGCCCGAAGCCACTGACACGGACATTATCCCGGAGGAAGAGGACGAT  
GAGGACGACACTGCCAATTCTATGACCATCAATGCCAATGGCACCCCTGAGCAACACCAGC  
ACGACAAGGGAAGACCAAAACAGTCCAAGCGCCCTCTTAGTGGACGCGATAGGTGCAGCG  
GCGACTGGCCAGGAGAACGCGAGGGTCCCCGCTCTCGTCCAGTCCCCGGGCACGGCTGGA  
AGCGGCTCCAGCGGCGCCTGGGGTCCCAGCAGCCGAGGAAGTCCTCCTCACGCCGGAAC  
GCCTGGGGCAACCTGTGCTACGCAGACCTGATAACCAAAGCCATAGAGAGCACGCCGGAC  
AAGAGGCTCACCTTGTCCCAGATCTACGACTGGATGGTCAGGTGTGTCCTGACTTTAAG  
GATAAAGGCGACAGCAACAGCTCGGCCGGGTGGAAGAATTCCATCCGACACAACCTGTGCG  
CTGCACAGTCGTTTTATTCCGGGTGCAGAACGAGGGCACTGGGAAGAGCTCTTGGTGGATG  
ATCAATCCGATGGTGGGAAGGGTGGCAAGGCCCGCGCCGACGGGCCGTTTCCATGGAC  
AACAGCAACAAGTACAGCAAGAGCCGGGGCGCGCAGCCAAGAAGAAGGCAGCTTTGCAA  
GCAGGGCAAGAGGGGGGTGCGGAGAGTCCCTCCAGCCAGCTCAACAAGTGGCCGGGGAGC  
CCTACCTCTCGCAGCAGCGATGAGATGGACCCCTGGACCGACTTCCGCTCGCGACCAAC  
TCCAATGCGAGACCATCAGCGGACGCCTCTCGCAATCTTAGCCAACCCTGAGCTGGAC  
GAGGTGCCTGACGACGACGACCGCTGTCCCCATGCTGTACTCCAGCCCCAGCAGTCTG  
TCCCCTTCGGTCAAGAACCTGCTCCACAGAGCTCCCCAGGCTGGCAGACTTGGCCGGT  
ACTATGAATCTAATGAAGGGCTCTCGGACAACCTGATGGATGACCTTCTTGACAACATC  
AACCTGACCCCTCCAGCAACAGTCTCCAGGGAGTGTCAACGGCAGCAATGGGGGTGGC  
GGGATCATGCAGAGGAGCTCCAGCTTACCTACGGCTCCAAAGGCACGGGCCCTGGGTTCC  
CCTTCTGGCAGCTACCCAACTCCATCTTCGGCACCCCGTCCCTCACTGGCCTACGCCAG

TCGCCCATGCAGACCATCCAGGAGAACAAGCAGGCCACTTTCTTGCATCTCCACTTT  
GGCAACCAAACCTGCAGGATCTGCTCAGCTCAGACTCGCACAGCCACAGTGACGTCATG  
ATGACTCAGTCGGATCCTCTCATGTGCGCAGGCCAGCACCTCCGTCTCCTCGCAGAGCTCC  
CGCCGGAACATCATGTTGCGCAGTGACCCGATGATGTCCTTACCGCCTCCAGTCAAC  
CAGGGGAAGCCCTGTGAACCATGGGAGCCTGCTGCACCCTCATCCCCATTCTCAGAACTCG  
CTGGGGGGAAGCCGGGCTGGGTTGTCCAGCCTGGTCAACGGGGGCATCGGCCTGGCCAAT  
GAGACCAACAGCCTGTTTTCTGCCAAGCACCAGCTCCAGTCTCCAGTGGCAGTAACCAA  
TCTATGCAAATCTGTAGCTCTGACTCTTCTTATACTCCAGTCTCAGCGAAAGTGGCATC  
ACCCTTCCGTCCATGAATCAGGACAAGTTCCCTAGTGACCTTGACCTGGACATGTTAAT  
GGCAGCCTGGAGTGTGATATGGACTCCATCATCCGCAGTGAGCTCATGGATGCTGATGGT  
TTGGACTTCAAATTTGATTGCTCATCTCCGCTCAGAATGTTGTCAACCTAATGTGGGG  
AACTTCACTGGTGCTAAACAGACCTCCTCCAGAGCTGGGTGCCTGGT

>guppy\_FOXO3a

ATGGCCGAAGCTCCGCTCCCCGACACGCTCCCGACTTGGACGTGGTCATTGACCCGGAC  
TTTGTAGCCCCAGAAGCGGCCCGGTCTTGACCTGGCCGCTGCCGCGACCCGACTCCAGC  
GCGGTGAAACCGGAGAGCACCAGGCGGATATCATACCCGAGGAGGAGGATGACGAGGAG  
GACAGCGCAACCCCCACGGCAATCACTGTCAATGGCTCCGCTGCGGGCAGCGGAGACCAG  
AGCAGTAACAGCCCCGTTACCGACGGTGCCTTCCCTCCCCGGCCACGACAGCGGAGGC  
TCCCCGCTCTCCACGCACTACCGACGGCCACCTCCTGTGCCCTGACTCCGAGCGGCTTG  
GCTGCAGCGCAGACCCCCGAGGAAGGCATCATCCCGCCGAACGCCTGGGGGAACCTCTCC  
TACGCCGACCTGATACCAAAGCCATCGAGAGCTCACCAGAGAAGAGACTGACCCTGTCC  
CAGATCTATGACTGGATGGTGAGATCCATCCCTTACTTTAAGGACAAAGGCGACAGCAAC  
AGCTCTGCCGGATGGAAGAACTCCATCCGGCACAACCTGTCTCTCCACAGTCGTTTCATC  
CGTGTCCAGAATGAGGGAACAGGAAAGAGTTCGTGGTGGATGATCAACCCAGAGGGAGGA  
AAGGGAGGCAAGGCTCCACGGCGCCGGGCCGTCTCCATGGACAACAGCAACAAGTACACC  
AAGTCTGCTCGTGGCCGTGCTGCTGCTAAGAAGAAGGCCGCCCTGCAGGCTGTGGCTGCT  
GCAGCTGGGGGAAGGCGGGGAGACAGTCCGTCAGGCCCTCGAAGTGGCCGGGAAGCCCCG  
ACGTCACGCAGCAGCGAGGAGCTGGATGCTTGGACAGACTTCCGCTCCCGAACCAACTCT  
AACGCCAGCACGCTCAGCGGACGCCTCTCGCCAATCTTAGCGAATCCCGAGCTGGACGAG  
GTGCCTGACGACGAGCCTCCTCTCTCGCCAATGATCTACTCCAGTCCCTGGCAGGGCGTTG  
TCTCCTGGAAACACCAACGGGAAGGCCGTGCCCGCTGAGCTGCCTCGTCTGGCAGATCTG  
GCAAACACAATGAATCTAAATGATGGGATCGCACAAGATCTGATGGATGATTTTCTGGAT  
AACATCAAGCTCGTACCAACCACCTGCAGCCAAGCCATGCAGAATGGTTCCTCAGGGTTT  
AGTTTTGGGTCCAAGCCCAACGGGATAGGGTACCTTCTTCCACTTCATCTCCACCCTCC  
AATAACTCCTCTAACGGAGGAGGCAATAGCTACAGTAACTCCATCTTTAGCCCTTACACA  
GCAGGCTCCTCCTTACGTCCATCTCCCATGCAGACCATCCAGGAGAATAAGCAAACCTCA  
TTTTCCACAACCTGGCATGTCTCACTTTGGCAGCCAAACACTACAAGATCTTCTTAACTCT  
GACAGCCACAATCACAGTGACGTATGATGACCCAGTCTGACCCATTAATGTCACAGGCC  
AGTGCTGTTGCCATCATTTCCAGAACTCCCGTCGAAATGTTATGGTCCGTAACGATCCT  
GTCATGACTTTTGGGACCACTGGTGGACTCCAGAGTAGCCATAGGGGAGATGCTCCAAACT  
AACAACCACAACCAGAGCACCATGAGGTCTTTGAACGGAGATCTGAACCTCGCCAACGAG  
GCAAACACTCTGGCTAGCGTCAAACAACAACCTTCTACTGTCACCAATTGGTGGAAATGGA  
ACGTCCTCCATGCAGATTGACACCTCCATCTTTCTAAATGGCACGGCGAGCAGCAGCGGC  
GGGTGTCAGGACCGCTTCCCGACAGACCTGGACCTGGATATGTTCAACAGCGGCAGCTTG

GAGTGTGACATGGAGTCCATCATTAGGAATGATCTGATGGATGCTGATGGTCTGGATTTT  
AATTTTGAGTCACTGGCCAACATGAACGGAGTCAGCAACTTCACAACCACCAAGCAGAGC  
TGGGTGCCTGGT

>American\_alligator\_FOXO3a

ATGGCAGAGGCGTCGCCGCCCGCGCCCCGTCGCCGCTGGACGTGGAGCTGGACCCCGAG  
TTCGAGCCCCAGAGCCGGCCGCGCTCCTGCACTTGGCCGCTGCAGAGGCCCGAGCTGCAA  
GGCAGCCCGTCCAAGCCCGCGGGGAGGGCGGCCGCGCCGACGCCGCTCCATGATCCCCGAG  
GAGGACGACGACGACGAGGACGGGGGCGGCTCGGCCATGGCCATCGGCGGGCGCCGGCCCC  
AGCGGGCGGGACGCGGGCGCTGGTGCNNNNNNNNNNNGGGCGGGGGCCGCCACCAGCC  
TCTTCGGCCCCGCAAGTGTTCGTCGCGGGCGCAACGCGTGGGGCAACCTGTCTGACGCC  
GACCTGATACCCGCGCCATCGAGAGCGCCCCGGACAAGCGCCTCACGCTCTCGAGATC  
TACGACTGGATGGTGCCTGCGTGCCTACTTCAAGGATAAGGGCGACAGCAACAGCTCG  
GCCGGCTGGAAGAACTCAATCCGGCATAACCTATCACTTCATAGTCGATTCATCAGGGTG  
CAGAATGAAGGAACCGGAAAAGCTTTGGTGGATGATCAACCCAGATGGTGGGAAAGGA  
GGGAAGGCCCAAGGAGACGTGCTTTCCATGGACAATAGCAACAAGTACACTAAGAGC  
AGGGGGCGAGCAGCTAAGAAGAAGGCAACCCAACAAGCCGCACAAGAATTGAGTGATGAC  
AGCCCTTCTCAGCTTTCCAAGTGGCCAGGGAGCCCAACATCCCGTAGCAGCGATGAGTTG  
GATGCCTGGACAGATTTTCGATCTCGTACAAATTCAAATGCCAGTACAATAAGTGGCCGC  
TTGTCACCCATATTGGCAAGTACTGAACTGGATGATGTTTCCAGGATGATGATGCTCCACTT  
TCCCAATGTGTACAATAGTCCATCAAGCTTGTCCCATCAGTAAATAAGCCGTGTACA  
GTTGAGTTGCCTCGGCTAACCGATATGGCAGGCACAATGAACTTAAACGATGGACTGACG  
GATAATCTCATGGATGATCTTTTGGACAATATAACGCTCCCTCTTCCAGCAGTCACT  
TCTGGGGGGCTGATGCAAAGAAGCTCCAGTTTTCCATATGGCTCCAAAGGTTCCGGGTCTT  
GGTTCTCCATCCAGTAGTTTCAACAATGTGTGTTGGACCATCCTCTCTGAATCCCTC  
CGCCAGTCTCCCATGCAAACATAACAAGAGAACAAGCAAGCTACCTTTTCTCCATTTCT  
CATTACAACAACCAGACGCTTCCAGGACCTGCTGGCATCTGATTTCGCTAGTCACAGTGAT  
GTCATGATGACGCAGTCAGATCCGCTCATGTCACAAGCCAGCACTGCTGTGTCTGCCAA  
AACTACGCAGGAATATAATGCTTCGTAATGACCCAATGATGTCATTTGCTGCTCAGTCC  
AACCAGGGAAGTTTGGTCAAGTCAAAACCTGCTCCACCACCAGCATCCATCTCCGAATTCT  
CCTCTTAGTGGCAGCCGTGCCTTGTGCAATTCAGTCAGTAACATGGGCTTAAATGACACG  
AACAGCTTGGGGTCAGCCAAACACCAGCAGCAGTCACTGTCAATCAGTCTATGCAAACA  
CTTTCTGATTCACTCTCAGGCTCTCTTTGTATTCTGCTGGTGTGAACCTTCCAGTCATG  
GGACATGATAAATCCCAAGTATTGGACCTGGATATTTCAATGGGAGCTTGGAAATGT  
GACATGGAGTCCATTATCCGAGTGAGCTCATGGATGCAGATGGGTTGGATTTAATTTT  
GATTCCCTCATCTCAGCTCAGAACGTTGTCACTCTAAATGTGGGGAACTTCACTGGTGCT  
AAACAGGCTTCATCACAGAGTTGGGTGCCTGGC

>Armadillo\_FOXO3a

ATGGCAGAGGCACCGCCTCCCCGGCCCCACTGTCTCCGCTCGAAGTGGAGCTGGACCCC  
GAATTCGAGCCTCAGAGCCGGCCACGCTCTTGACATGGCCCTTGAGAGGCCGGAGCTC  
CAGGCGAGCCCCGCAAGCCCTCGGGGAGGTGGCCGCGACTCCATGATCCCCGAGGAG  
GAGGACGATGAAGACGACGAGGACGGCGGGCGGGGCCGGCTCGGCCATGGCGATCGGC  
GGCGTTGGGAGCGGCACGCTGGGCTCCGGGCTGCTCCTTGAGGACTCGGCCCGGCTCCTG  
GTTCCCGGGCGGACAGACCCCGGGTCCGGGCCAGCCCCAGCAGCGGGTGCCTGAGCGGG  
GGAACGCCGACGCGCTGCAGCCTCAGCAGCCGCTGCCACTGCCGAGCCGGGGGGCGGCT

GGGGGCTCCGGGCAGCCGAGGAAATGCTCGTCGCGGCGGAACGCGTGGGGGAACATGTCC  
TACGCCGACCTAATCACCCGCGCCATCGAGAGCTCCCCGGACAAACGGCTCACTCTGTCC  
CAGATCTACGAGTGGATGGTTTCGCTGCGTGCCCTACTTCAAGGATAAGGGTGACAGCAAC  
AGCTCTGCGGGCTGGAAGAACTCCATCCGGCATAACCTGTCCCTGCACAGCCGGTTCATG  
CGGGTTCAGAATGAAGGGACTGGCAAGAGTTCTTGGTGGATCATAAACCCCTGATGGGGGG  
AAGAGTGGAAGGCACCCCGGCGGCGGGCGGTCTCCATGGACAACAGCAACAAGTACACC  
AAGAGCCGTGGCCGTGCAGCCAAGAAGAAGGCAGCCCTGCAGACAGCCCTGAGTCGGCA  
GACGACAGTCCCTCCAGCTCTCAAATGGCTGGCAGCCCCACCTCCCGCAGCAGCGAT  
GAGTTGGATGCATGGACGGACTTCCGCTCGCGACCAATTCCAACGCCAGCACGGTCAGC  
GGCCGCTGTACCCATCCTGGCAAGCACAGAGTTGGATGACGTCCAAGACGATGACTCA  
CCGCTCTCCCCATGCTGTACAGCAGTTCAGCCAGCCTCTACCCTCTGTAAGTAAGCCG  
TGCACCGTGGAGCTGCCGCGGCTGACCGACATGGCAGGCACCATGAATCTGAACGATGGG  
CTGGCTGACAACCTCATGGATGACCTGCTGGACAACATCGCCCTCCCATCGTCCCAGCCG  
TCGCCCCTGGGGGGCTCATGCAGCGCAGCTCCAGTTCCTTACACCACCAAGGGCTCT  
GGCCTGGGCTCTCCACCAGCTCCTTTAACAGCACGGTGTGGACCCTCGTCTCTGAAT  
TCCCTGCGTCAGTCTCCATGCAGACCATCCAAGAGAACAAGCCAGCCACCTTCTCTTCC  
ATGTCACACTATGGCAACCAGACACTCCAGGACCTGCTCACTTCCGACTCGCTCAGCCAC  
AGCGATGTCATGATGACCCAGTCGGACCCCTTGATGTCTCAGGCCAGCACTGCTGTGTCT  
GCCAAAACCTCGCGCCGGAACGTGATGCTTCGCAATGACCCGATGATGTCCTTTGCTGCC  
CAACCCAACCAGGGGAGTTTGGTCAATCAGAACTTGCTCCACCACCAGCACCAAAACCCAG  
AACGCAATCGGTGGCAGCCGTGCCTTGTGCAATTCCGTGAGCAACATGGGCTTGAGCGAC  
TCCAGCAGCCTTGGGTCCACCAAACACCAGCAGCAGTCTCCTGTCAGCCAGTCTATGCAA  
ACCTCTCGGACTCTCTCAGGCTCCTCCTGTACTCAACTAGTGCAAACCTTCTCTGTC  
ATGGGCCATGAGAAGTTCCCAGCGACTTGGACCTGGACATGTTCAATGGGAGCTTGGAA  
TGTGACATGGAGTCCATTATCCGTAGTGAACACTCATGGATGCTGATGGGTTGGATTTAAC  
TTTGATTCCCTCATCTCCACACAGAATGTTGTTGGTTTGAACGTGGGGAACTTCACTGGT  
GCTAAGCAGGCCTCATCTCAGAGCTGGGTGCCAGGC

>Chicken\_FOXO3a

ATGGCAGAGGCGTCGCCCCCGGGCCGCTCTCGCCCCTGGACGTGGAGCTGGACCCCGAG  
TTCGAGCCGAGAGCCGCCCCGCTCCTGCACCTGGCCGCTGCAGAGGCCGAGCTGCAG  
GCCAGCCCCGCAAGCCCGCCGGCGAGCCCGCCGACGCCGCTCCATGATCCCCGAG  
GAGGAGGACGACGACGAGGAGGGGGGGCGGCGGCCATGGCCGTCGGCGGCGGGCCCC  
GCGGGCGGCGAAGCGGCGGCCGCGGCCCCGAGGAGGCGGCGGCGGCCGCGGTCCCG  
CTGCCCCGAGGCGGCCGAGGGGCCCGGGCGCGCCGGAGGAGCGGCGGCGGCGGCG  
GGCGGCGGGGGTTGAGCGGCGGCGCCCCGCGGCGGCGGCGCCGAGGAAGTCTCGTCG  
CGGCGAACGCGTGGGGGAACCTCTCGTACGCCGACCTATCACAAAGCCATCGAGAGC  
GCCCCGAGAAGCGGCTCACCTCTCGCAGATCTACGACTGGATGGTGCGGTGCCTGCC  
TACTTCAAGGACAAGGGCGACAACAACAGCTCGGCCGATGGAAGAATTCAATCCGGCAT  
AACTTGTGCTCCACAGCCGATTCATCAGGGTGCAGAACGAAGGCACTGGGAAGAGCTCC  
TGGTGGATGATCAATCCAGACGGTGGAAAAGTTGGCAAGGCGCCCCGAGACGCGCCGTG  
TCCATGGACAACAGCAACAAGTACACAAAGAGCAGGGGGCGGGCGGCGAAGAAAAGGCA  
GCCCTGCAGACTGCCAGGAGGCGAGCGAGGACAGCCCTTCGAGCTCTCCAAGTGGCCG  
GGGAGCCCGACTTCCCGCAGCAGTGACGAGCTGGATGCCTGGACAGATTTTCGCTCCCGG  
ACAAATTCGAACGCCAGTACAATAAGTGCCGCTTGTACCGATTTTGGCGAGCACCGAG

CTGGATGATGTTCAAGATGACGACGCTCCACTTTCTCCCATGCTGTACAGTAGTCCTTCG  
AGCTTGTCCCCCTCGGTAAACAAACCGTGCACTGTGGAGTTGCCTAGGTTGACTGATATG  
GCTGGGACAATGAATTTGAACGATGGACTGACAGATAACCTCATGGATGACCTTTGGAC  
AATATAAACTCCCTTCTCCAGCAGTCGCCACAGGAGGGATGATGCAGAGAAGCTCC  
AGTTTTCCGTATGGTTCAAAGGTTCAAGGGCTGGGCTCCCCCTCGAGTAGTTTCAACAAC  
GCTGTGTTTGGGCCATCGTCCCTGAATCCCTCCGCCAGTCGCCCATGCAGACTATTAG  
GAGAACAAAGCAGGCTACCTTTTCTCCATTTCTCATTACAACAACCAGACGCTGCAGGAT  
CTGCTCGCCTCGGATGCACTTAGTCACAGCGATGTCATGATGACACAGTCTGACCCGCTT  
ATGTCCCAGGCCAGCACAGCTGTGTCCGCCAGAACTCCCGCAGGAATATAATGCTCCGC  
AATGACCCCATGATGTCGTTTGTGCACAGTCCAGTCAGGGCGGCCTGGTCAACCAGAGC  
CTGCCCATCACCAGCACCAGTCTCACAGCTCTCCTTTAGCGGCAGCCGTGCCTTGCC  
AATTCATCAGTAACATAGGCTTGAATGACTCCAACAGCTTGGGATCAAACATCAGCAG  
TCTCCTGTCAATCAGTCTATGCAAACACTTTCTGACCCTCTCAGGCTCCTCTTTGTAT  
TCCTTAGCATGAACCTTCCGGTCATGGGACACGAGAAATCCAAGTACTTAGACCTG  
GATATTTTCAATGGGAGCTTGGAGTGTGACATGGAGTCCATCATCCGCAGTGAACCATG  
GATGCAGATGGGCTGGATTTAACTTTGATTCCCTCATCTCAGCACAGAACGTTGTCAGT  
CTGAATGTGGGGAACCTCACTGGTGCTAAACAGGCTTCATCACAGAGTTGGGTACCAGGC

>Chinese\_softshell\_turtle\_FOX03a

ATGGCCATAGGCAGCGCCGTGCCACCGGCGGCGGAGGGGAAGCGCTGGCCCCGAGGAG  
GCGGCCCGGCTGCTGGCCCCGCTCTCCGGGTTGGGACGAGGGCTCGGGCAAGGCTTCT  
GGGCCAGCGGCTGCGGGGGCAGCGGGCTGAGCGGGGGCCAGGCAGCTGCGGCGCCGCGG  
AAATGCTCGTCGCGGCGAAACGCGTGGGGCAACCTGTCTACGCCGACCTGATACCCGC  
GCCATCGAGAGCGCCCCGACAAGCGGCTCACCTGTCCCAGATCTACGACTGGATGGTG  
CGCTGCGTGCCCTACTTCAAGGATAAGGGCGACAGCAACAGCTCGGCCGGCTGGAAGAAC  
TCGATCCGGCATAACTTGTACTGCACAGTCGATTTCATCAGGGTACAGAACGAAGGAAC  
GGGAAAAGCTCGTGGTGGATGATTAACCCAGATGGCGGGAAAGGTGGGAAGCCCCACGG  
AGACGCGCCGTTTCAATGGACAACAGCAACAAGTACACAAAGAGCAGAGGCCGAGCAGCG  
AAGAAAAAGGCAGCCCTGCAAGCTGCACAAGAAGCCAGCGAGGATAGCCCCTCTCAGCTT  
TCCAAGTGGCCGGGAGCCGACTTCCCGCAGCAGCGATGAGCTGGATGCATGGACCGAT  
TTCCGCTCCCGTACAAATTCAAACGCTAGTACAATAAGTGGTGGTTTGTACCTATCTTG  
GCGAGTACCGAACTAGATGAAGTTCAGGATGATGACGCTCCACTTTCTCCAATGCTGTAC  
AGTAGCCCATCAAGCATGTCCCATCGGTAAATAAACCATGTACTGTTGAGTTGCCTAGG  
TTGACTGATATGGCAGGCACAATGAACCTGAATGATGGACTGACAGATAACCTCATCATG  
GATGATCTTTTGGACAATATGACGCTCCCTCTTCCAGCAGTACCATCAGGGGGGCTC  
ATGCAAAGAAGCTCCAGTTTCCATATGGTTCCAAAGGTTCAAGCCTTGGTTCTCCGTCA  
AGTAATTTCAACAGTGCTGTGTTTGGCCCATCTCTGAATCCCTTCGTCAGTCTCCC  
ATGCAAACCATCAAGAGAACAAGCAAGCTACTTTTTCTTCCATTTCTCATTATAACAGC  
CAGACGCTGCAGGATCTCCTGGCATCTGACTCACTTAGTCACAGTGTATGATGACG  
CAGTCTGATCCACTCATGTCTCAAGCCAGCACAGCTGTGTCTGCCAGAACTCGCGCAGG  
AGTATCATGCTTCGTAGTGATCCAATGATGTCATTTGCTGCTCAGTCCAACCAGGGAAGT  
TTGGTCAATCAGAACCTGCTCCACCACCAGCATCAATCTCAGAATTCTTCTTGGTGGC  
AGTCGTGCCTTGTCTAATTCATCAGTAACATGGGCTTAAATGATACAAACAGCTTGGGG  
TCGGCCAAACACCAGCAGCAGTCACCTGTCAATCAGTCTATGCAAACACTTTCTGACTCA



CTCTCAGGCTCTTCTTTGTATTCCACTAGTATGAACCTTCCAGTCATGGGACACGATAAA  
TTCCAAGCGATTGGACCTGGATATTTCAATGGAAGCTTGAATGTGACATGGAGTCC  
ATTATCCGACGGAACCTCATGGATGCAGATGGGTTGGATTTAACTTCGATTCCTCATC  
TCTGCTCAGAACGTTGTCAGTCTGAATGTGGGAAGTTTCACTGGTGCTAAGCAGGCTTCG  
TCACAGAGTTGGGTGCCAGGC

>Cod\_FOXO3a

ATGGCCGAGGCGTCGCAGGACGAACAAAACCTAAACGTTGAAATAGACCCAGACTTCGAG  
CCCCAGAAAAGGCCCGGTCGTGCACTTGCCCTGCCGCGTCCGGAGTCGGGCGCGAGC  
AAACCGGGGACGAATGACTGACGTCATCCCCGAAGAGGAGGACGACGAGAACGACGCG  
GAGAATCGCGGCGTCGAGAAGAACTGCGCCGAGCTCGGGCCAAGGCCCGCAATGGACCC  
TCCTCCCTGCCGTCGGAGGTACGGAGGAGCACCCCGTCCAGCAGCAGGGAGGAAGGGGTG  
GAGGACGGGTCCCCTTCTCCTCCTCCATCCACCCCTCCGCTGCGGCGGCTCACGGCGGC  
TCTGCCTCCCAGCAGCTGAGGAAGTCTCCGCCCCGAGGAACGCCTGGGGGAACACTCG  
TACGCGGACCTCATACGCAGGCCATCGAGAGCTCCCCGGAGAACCGGCTGACCCTTTCC  
CAGATCTACGACTGGATGGTGAGGTCGGTGCCTACTTCAAGGACAAAGGAGACAGCAAC  
AGCTCCGCGGGCTGGAAGAACTCCATCCGCCACAACCTGTCGCTGCACAGCCGCTTCGTC  
AAGGTGCAGAACGAGGGCACGGGCAAGAGCTCCTGGTGGATGGTCAACCCGAGGGCGGC  
AAGGGGGGCAAGGCGCCGCGCCGCGCCGCTCTCCATGGACAACAGCAAGTACATCAAG  
GGCGCCCGGGGGCGGGCCACCAAGAAGAAGGCGTCCCTGATGGCCGCGCAGGACGGCAGC  
TCGGAGAGCTCGTCCAGCCTGTCCAAGTGGACGGGAGCCCCACGTCGCGCAGCAGCGAC  
GAGCTGGACGCTGGACCGACTTCCGCTCGCGCACCAACTCCAACGCCAGCAGCTGAGC  
GGCCGCTGTGCCCATCCTCGCCAACCCGGAGCTGGACGAGGCTCAGGACGACGGCGGC  
GGCGGCGGAGACTCGGCCCCCTCTCCCCATGCTGTACTCCAGCCCCAGCAGCATGTCC  
TCCTCCACGGGCCCCATGGCGTCCCCGACCTGGCGGGCACCATGAACCTCAACGACGGG  
CTCTCGGACAACCTGATGGACGACCTCCTGGACAACATCAGCCTGACGGCCGCCAGCAG  
GCGCCCCCGGCGAGGGGGACGACGACGACGACAACGTCGAGGACGAC

>Cow\_FOXO3a

ATGGCAGAGGCGCCGGCCTCCCCGGCCCCGATCTCTCCGCTCGAAGTGGAGCTAGACCCG  
GAGTTCGAGCCCCAGAGCCGGCCGCGCTCCTGTACGTGGCCCCTGCAGAGGCCGGAGCTC  
CAGGGGAGCCCGCCAAGCCCTCTGGGAGGCGGCTGCTGACTCCATGATCCCCGAGGAG  
GAGGACGATGAAGACGACGAGGACGGTGGCGGTAGGGCCGGCTCGGCCATGGCGATCGGC  
GGCGGCGGGGGCGGCCGCTGGGCTCTGGGTTGCTCCTGGAGGACTCGGCCGGCTGCTG  
GCTCCTGGAGGGCAGGACCCCGGGTCCGGGCCAGCCCCGCGGGCGGGCGCTGAGCGGG  
GGGACGCAGACACCGCTGCAGCCTCAGCAGCCACTGCCACCGCCGAGCCGGGGACGGCT  
GGGGGCTCTGGGAGCCGAGGAAATGCTCGTCGCGGAGGAACGCCTGGGGGAACCTGTCC  
TACGCCGATCTGATCACTCGCGGATCGAGAGCTCTCCAGACAAACGGCTCACTCTGTCC  
CAGATCTATGAGTGGATGGTGCCTGCGTGCCTACTTCAAGGATAAGGGCGACAGCAAC  
AGCTCTGCCGGCTGGAAGAACTCTATCCGGACAACCTGTCACTGCACAGCCGGTTCATG  
CGGGTCCAGAATGAGGGAACCGGCAAGAGCTCGTGGTGGATCATCAACCCTGACGGCGGG  
AAGAGTGGAAGGCGCCCCGGCGGGCGGGCCGTCTCCATGGACAACAGCAACAAGTACACC  
AAGAGCCGCGCCGTGCAGCAAGAAGAAGGCAGCCCTGCAGACCGCCCCGAGTCAGCA  
GATGACAGTCCCTCCAGCTCTCAAGTGGCCCGCAGCCCCACATCCCGCAGCAGCGAT  
GAGCTGGACGCGTGGACCGACTTCCGCTCGCGCACCAATTCCAACGCCAGCACAGTCAGC  
GGCCGCTGTCCCCATCCTGGCGAGCACGGAGCTGGACGACGTCAGGACGATGATGCA

CCACTGTCCCCATGCTCTATAGCAGCTCGGCCAGCCTGTGCCCCTCCGTACAGCAAGCCG  
TGACTGTGGAGCTGCCCCGGCTGACCGACATGGCGGGCACCATGAATCTGAACGACGGG  
CTGGCCGACAACCTCATGGACGACCTGTGGACAATATCGCGCTCCCTGCATCCCAGCCA  
TCGCCCCGGGGGGGCTCATGCAGCGCAGCTCCAGCTTCCCGTACACCACCAAGGGCTCC  
GGCCTGGGCTCCCCACCAGCTCCTTCAGCAGCGCGTATTTGGTCCCTCGTCTCTGAAC  
TCCCTGCGCCAGTCTCCATGCAGACCATCCAAGAGAACAAGCCAGCCACCTTCTCTTCC  
ATGTCCCCTACGGCAACCAGACACTCCAGGACCTGCTCACATCGGACTCACTCAGCCAC  
AGCGATGTCATGATGACCCAGTCGGACCCCTTGATGTCTCAGGCCAGCACCGCTGTGTCC  
GCCAGAACTCCCGCCGGAACGTGATGCTTCGCAGTGACCCAATGATGTCCTTTGCCGCC  
CAGCCTAACCAGGGGAGTTTGGTCAATCAGAACTTGCTCCACCACCAGCACCAAACCCAG  
GGCGCTCTCGGTGGCAGCCGTGCCTTGTCGAATTCCGTACGCAACATGGGCTTGAGCGAC  
TCCAGCAGCCTCGGGTCAGCCAAACACCAGCAACAGTCTCCCGTCAGCCAGTCTATGCAA  
ACCCTCTCGGACTGTGTCTCAGGCTCCTCCTTGTAICTAACCAGTGCGAACCTTCCAGTC  
ATGGGTACAGAGAAGTTCCCAGCGACTTGGACCTGGACATGTTCAATGGGAGCTTGGAA  
TGTGACATGGAGTCCATTATCCGTAGCGAACTCATGGATGCTGATGGGTTGGATTTAAC  
TTTGATTCCCTCATCTCCACACAGAACGTTGTTGGTTTGAACGTGGGGAGCTTCACTGGT  
GCTAAGCAGGCCTCATCTCAGAGCTGGGTGCCAGGC

>Dog\_FOXO3a

ATGGCAGAGGCGCCGGCCTCCCCGGGCCCGCTCTCCCCGCTCGAAGTGGAGCTGGACCCC  
GAGTTCGAGCCCCAGAGCCGGCCGCTCCTGTACGTGGCCCCTGCAGAGGCCGGAGCTG  
CAGGGGAGCCCGCCAAGCCCTCGGGGGAGACGGCCCGGACTCGATGATCCCCGAAGAG  
GACGACGACGACGACGACGAGGACGGCGGTAGGGCCGGCTCGGCCATGGCGCTCGGCGGC  
GGCGGGGGCGGCGCGCTGGGCTCCGGGCTGCTCCTCGAAGACGCGGCCCGGCTGCGGGCT  
CCCCGGGGGGCAGGACCCCGGGGCCGCGCCGGGCCCGCGGGCGCGCCGAGCGGGGGG  
ACCCAGGCGCCCGCAGCCTCCGCAGGCGCTGGCCCCGCGCAGCCGGGGCGGCCGGG  
GGCTCGGGGCGAGCCGAGGAAGTGCTCGTCGCGGCGCAACGCCTGGGGCAACCTGTCTAC  
GCCGACCTCATCACTCGGCCATCGAGAGCTCGCCCCGACAAACGGCTCACTCTGTCCCAG  
ATCTACGAGTGGATGGTGCGCTGCGTGCCTACTTCAAGGATAAGGGCGACAGCAACAGC  
TCGGCGGGGTGGAAGAACTCTATCCGGCACAACCTGTCACTGCACAGTCGGTTCATGCGA  
GTCCAGAATGAGGGGACTGGCAAGAGCTCTTGGTGGATCATCAACCCTGATGGGGGAAAG  
AGCGGGAAGGCACCCCGCGGCGGGCTGTCTCCATGGACAACAGCAACAAGTATACCAAG  
AGCCGTGGCCGTGCAGCCAAGAAGAAGGCAGCCCTGCAGACAGCCCTGAGTCAGCAGAT  
GACAGTCCCTCCAGCTCTCAAGTGGCCCCGAGCCCCACGTCACGCAGCAGCGATGAG  
CTGGATGCATGGACGGACTTCCGCTCGCGACCAATTCTAATGCCAGCACTGTCAAGTGGC  
CGCCTGTACCCATCTTGGCAAGCACGGAGTTGGATGACGTCCAGGATGATGACGCACCA  
CTCTCCCCATGCTCTACAGCAGCTCAGCTAGCCTCTCACCTCTGTGAGTAAGCCATGC  
ACTGTGGAGTACCACGGCTGACCGACATGGCAGGCACCATGAATCTGAATGATGGGCTC  
TCTGACAACCTCATGGATGACCTGCTGGATAACATCACACTCCCATCGTCCCAGCCATCG  
CCCCTGGAGGGCTCATGCAGCGGAGCTCTAGCTTCCCATATACCACCAAGGGCTCCGGC  
CTGGGTTCTCCAAGTCTCTTTAACAGCACGGTGTTCGGACCCTCGTCTCTGAATTCC  
CTGCGCCAGTCTCCATGCAGACCATCCAAGAGAACAAGCCAGCTACCTTCTTCCATG  
TCACACTATGGCAACCAGACACTCCAGGACCTGCTCACTTCAGACTCACTCAGCCACAGC  
GATGTCATGATGACCCAGTCGGACCCCTTGATGTCTCAGGCCAGCACCGCTGTGTCCGCC  
CAGAACTCCCGCCGGAACGTGATGCTTCGAAATGACCCAATGATGTCTTTTGCCGCCAG

CCTAACCCAGGGGAGTTTGGTCAATCAGAACTTGCTCCACCACCAGCACCAAACCCAGGGT  
GCTCTCGGTGGCAGCCGTGCCTTGTGCAATTCTGTCAGCAACATGGGCTTGAGCGACTCC  
AGCAGCCTTGGGTCGGTTAAACACCAGCAACAGTCTCCTGTCAGCCAGTCTATGCAAACC  
CTCTCGGACTCTCTCAGGCTCCTCCTGTACTCAACTAGTGCAAACCTTCCCGTCATG  
GGCCATGAGAAGTTCCCCAGCGACTTGACCTGGACATGTTCAATGGGAGCTTGGAATGT  
GACATGGAGTCCATTATCCGTAGCGAACTCATGGATGCTGATGGGTTGGATTTAATTTT  
GATTCCCTCATCTCCACACAGAATGTTGTTGGTTTGAACGTGGGGAACTTCACTGGTGT  
AAGCAGGCCTCATCTCAGAGCTGGGTGCCAGGC

>Dolphin\_FOXO3a

ATGGCAGAGGCGCCGGCCTCCCCGGCCCCGCTCTCTCCGCTCGAAGTGGAGCTGGACCCG  
GAGTTCGAGCCCCAAAGCCGGCCGCTCCTGTACGTGGCCCCTGCAGAGGCCGGAGCTC  
CAGGGGAGCCCCGCCAAGCCCTCGGGGAGGCGGCCGCTGACTCCATGATCCCCGAGGAG  
GAGGACGATGAAGACGACGAGGACGGCGCGGTAGGGCCGGCTCGGCCATGGCGATCGGC  
GGCGCGCGGGCGGCCCGCTGGGCTCAGGGCTGCTCCTGGAGGACTCGGCTCGGTGCTA  
GCTCCGGGAGGGCAGGACCCCGGTCCGGGCCAGCCCCCGCGCGGGCGCGCTGAGCGGG  
GGGACGCAGACGCCGCTGCAGCCTCAGCAGACTGCCACCGCCGAGCCGGGGGCGGT  
GGGGGCTCCGGGCAGCCGAGGAAATGCTCGTCGCGACGGAACGCCTGGGGGAACCTGTCA  
TACGCTGACCTGATCACTCGCGCCATCGAGAGCTCCCCGGACAAACGTCTCACTCTGTCC  
CAGATCTACGAGTGGATGGTGCCTGCGTGCCTACTTCAAGGATAAGGGCGACAGCAAC  
AGCTCTGCCGGCTGGAAGAACTCCATCCGGCACAACTGTGCTGCACAGCCGGTTCATG  
CGGGTTCAGAATGAGGGGACCGCAAGAGCTCATGGTGGATCATCAACCCCGACGGGGGG  
AAGAGCGGGAAGGCGCCCCGGCGGGCCGTCTCCATGGACAACAGCAACAAGTACACC  
AAGAGCCGGGGCGTGCAGCCAAGAAGAAGGCAGCCCTGCAGACCGCCACCGAGTCAAAC  
GACGACAGTCCCTCCCAGCTCTCAAGTGGCCCGCAGCCCCAGTCTCGCAGCAGTGAT  
GAGCTGGATGCGTGGACCGACTTCCGCTCACGCACCAATTCCAATGCCAGCACGGTCAGT  
GGCCGCTGTCCCCTATCCTGGCTAGCACGGAGTTGGACGACGTTTCAAGGATGATGACGCG  
CCACTCTCCCCATGCTCTACAGCAGCTCGGCCAGCCTGTCCCCCTCCGTACAGCAAGCCG  
TGCACCGTGGAGCTGCCCGGCTGACCGACATGGCGGGCACCATGAATCTGAACGACGGG  
CTGGCCGACAACCTCATGGACGACCTGCTGGACAACATCGCGCTCCCTGCGTCCCAGCCG  
TCGCCCCCGGAGGGCTCATGCAGCGCAGCTCCAGTTCACATACACCACCAAGGGCTCC  
GGCCTGGGCTCCCCACCAGCTCCTTACGAGCAGCGGTGTTTGGCCCCTCGTCTCTGAAC  
TCCCTGCGTCAGTCTCCATGCAGACCATCCAAGAGAACAAGCCAGCCACCTTCTCTTCC  
ATGTGCGACTACGGCAACCAGACACTCCAGGACCTGCTCACGTCCGACTCACTCAGCCAC  
AGCGATGTCATGATGACCCAGTCGGACCCCTTGATGTCTCAGGCCAGCACCGCTGTGTCC  
GCCAGAACTCCCGCCGGAGCGTGATGCTTCGCAGCGATCCAATGATGTCCTTTGCCGCC  
CAGCCTAACCCAGGGGAGTTTGGTCAATCAGAACTTGCTCCACCACCAGCACCAAACCCAG  
GGCGCTCTCGGTGGCAGCCGTGCCTTGTCAAGTTCGGTCAGCAACATGGGCTTGAGCGAT  
TCCAGCAGCCTCGGGTCAGCAAACACCAGCAGCAGTCTCCTGTCAGCCAGTCTATGCAA  
ACCCTCTCGGACTCTCTCAGGCTCCTCCTTGTACTCAGCTAGTGACACCTTCCCGTC  
ATGGGCCACGAGAAGTTCCCAGCGACTTGGACCTGGACATGTTCAATGGGAGCTTGGA  
TGTGACATGGAGTCCATTATCCGTAGCGAACTCATGGATGCTGATGGGTTGGATTTAAC  
TTTGATTCACTCATCTCCACACAGAACGTTGTTGGTTTGAATGTGGGGAGCTTCACTGGT  
GCTAAGCAGGCCTCATCTCAGAGCTGGGTGCCAGGC

>Duck\_FOXO3a

ATGTTCTGGGGGAGGCGAGATCAATTTCTGCACTTCAACGCAGCTGCAGCAGCGCTGGC  
CATAAACTCCATCCGGCACAACCTTGTGCTCCACAGCCGCTTCATCAGGGTGCAGAAC  
GAGGGCACCGGGAAGAGCTCCTGGTGGATGATCAATCCAGATGGCGGAAAAGTGGGCAAG  
GCGCCACGCAGACGCGCGTGTCCATGGACAACAGCAACAAGTACACCAAGAGCAGAGGG  
CGGGCGGCTAAGAAAAAGGCGGCCCTGCAAACGGCCAGGAGGCAAGCGAGGACAGCCCT  
TCCCAGCTCTCAAGTGGCCGGGGAGCCCAACGTCCCAGCAGCGGCGATGAGCTGGACGCC  
TGGACGGATTTTCTGCTCCCGACGAATTC AACGCCAGTACGATAAGCGGCCGCTTGTC  
CCCATTTTGGCAAGCACCGAGCTAGATGATGTTCAAGACGACGACGCTCCGCTTTCTCCC  
ATGCTGTACAGCAGTCCATCGAGCTTGTCCCCCTCGGTAAACAAACCGTGTACCGTGGAG  
TTGCTAGGTTGACTGATATGGCCGGGACAATGAATTTGAACGATGGACTGACAGATAAC  
CTCATGGATGATCTCTGGACAATATAACTCCCTTCTCCCAGCAGTCGCCACGGGA  
GGGATGATGCAGAGGAGCTCCAGCTTTCCGTATGTTTCAAAGGTTCCGGGCTGGGTTCC  
CCCTCAAGTAGTTTCAAACAACGCCGTGTTCCGGGCCCTCGTCCCTGAACTCCCTCCGCCAG  
TCGCCATGCAGACCATTCAGGAGAACAAGCAGGCCACCTTCTTCCATGTCCCATTAC  
AACAAACCAGACGCTGCAGGATCTGCTCGCCTCGGACGCGCTCAGTCACAGCGATGTCATG  
ATGACGCAGTCCGACCCGCTCATGTCCAAAGCCAGCACAGCTGTGTCCGCCAAAACCTCC  
CGCAGGAACATCATGCTCCGCAACGACCCCATGATGTGTTGCCGCGCAGTCCAGCCAG  
GGCGGTCTGGTCAATCAGAGCCTGCCACATCACCAGCACCAGTCTCACAGCTCTCCTCTT  
AGCGGCAGCCGTGCCTTGTCCAATCCATCAGTAACATAGGCTTGAGTACTCGAACAGC  
TTGGGTTCTCCAAACATCAGCAGTACCCCGTCAACCAGTCTATGCAAACACTTTCTGAC  
CCGCTCTCAGGCTCCTCTTTGACTCCTTAGCGTGAACCTCCCGGTCATGGGACACGAG  
AAATCCCGAGTACTTGGACCTGGATATTTCAATGGGAGCTTGGAGTGTGACATGGAG  
TCCATCATCCGAGTGAACCTCATGGATGCAGATGGGCTGGATTTAACTTTGATTCCCTC  
ATCTCAGCTCAGAACGTTGTGAGTCTGAATGTGGGGAACCTCACTGGTGCTAAACAGGCT  
TCATCACAGAGTTGGGTACCAGGC

>Elephant\_FOXO3a

ATGGCAGAGGCACCGCCTCCCCGACCCTGCTTTCGCCGCTGGAAGTGGAGCTGGACCCT  
GAGTTCGAGCCCCAGAGCCGGCCGCTCCTGTACGTGGCCCTTGACAGAGGCCGGAGCTC  
CAGGCGAGCCCGCCAAGCCCTCGGGGGAGGCGGCCGCGATTCCATGATCCCCGAGGAG  
GACGACGATGAAGACGAGGAGGACGGCGCGGTGGGGCCGGCTCGGCTATGGCGATCGGC  
GGCGGCGAGAGCGGCACGCTGGGCTCGGGGCTGCTTCTTGAGGACCCGGCTAGGCTGCTG  
GCTCCCGGAGGGCAGGACCCTGGGTCCGGGCAAGCCCCGCGCGGGCGCGCTGAGCGGG  
GGGATGCAGGGGGCGGCTGGGGGCTCCGGGCAACCGAGGAAATGCTCGTCGCGCCGGAAC  
GCTTGGGGGAACCTGTCTACGCTGATCTGATCACCCGCGCCATCGAGAGCTCTCCGGAC  
AAGCGGCTCACCTGTCCCAGATCTACGAGTGGATGGTGCCTGCGTGCCCTACTTCAAG  
GATAAGGGCGATAGCAACAGCTCGGCGGGTTGGAAGAACTCTATCCGGCACAACCTGTCG  
CTGCATAGCAGGTTATGCGGGTCCAGAATGAGGGGACCGGCAAGAGTTCTTGGTGGATC  
ATCAACCCCGATGGGGGGAAGAGTGAAAGGCACCCCGCGGCGGGCAGTGTCCATGGAC  
AACAGCAACAAGTATACCAAGAGCCGTGGCCGTGCAGCCAAGAAGAAGGCAGCCCTGCAG  
ACGGCCCCTGAGTCAGCAGATGACAGTCCCTCCCAGCTTTCCAAGTGGCCTGGCAGCCCC  
ACCTCACGCAGCAGTGTGAGCTGGATGCGTGGACGGACTTCCGCTCACGCACCAATTCT  
AATGCCAGCACGGTCAGCGGCCGCTGTACCCATCCTGGCAAGCACAGAGTTGGACGAC  
GTCCAGGACGATGACGCACCTCTCTCCCCATGCTCTACAGCAGCTCAGCCAGCCTTTCA  
CCCTCTGTAAACAAGCCATGCACTGTAGAGCTGCCACGGCTGACTGACATGGCAGGCACC

ATGAATCTGAACGATGGGCTGGCTGACAACCTCATGGATGACCTGCTGGACAACATCACG  
CTCCCGTCGTCAGACATCGCCTCCTGGGGCGCTTATGCAGCGGAGCTCCAGCTTCCCG  
TACACCACCAAGGGCTCCACCTGGGTTCTCAACCAGCTCCTTTAACAGCACGGTGT  
GGACCTCCATCTCTGAATTCCTACGCCAGTCTCCCATGCAAACCATCAAGAGAACAAG  
CCGGCCACTTTCTTCCCTTTCACACTATGGCAACCAGACACTCCAAGACCTGCTTACT  
TCGGACTCGCTCAGCCACAGTGATGTCATGATGACCCAGTCGGACCCTTTGATGTCTCAG  
GCCAGCACTGCTGTGTCTGCCAGAACTCACACCGGAACGTGATGCTTCACAATGACCCG  
ATGATGTCCTTTGCTGCCAGCCCAACCAGGGGAGTTTGGTCAATCAGAACTTGCTCCAC  
CACCAGCACAAACCCAGGGCGCTCTTGGTGGCAGCCGTGCCTTGTCGAATTCTGTCAGC  
AACATGGGCTTGAGTGACTCCAGCAGCCTTCGGTCAGCCAAACACCAGCAGCAGTCTCCT  
GTCAGCCAGTCTATGCAAACCTCTCAGACTCTCTCAGGCTCCTCCTTGACTCAACT  
AGTGCAAACCTTCCGTTATGGGCCATGAGAAGTTCCCAGCGATTGGACCTGGACATG  
TTCAACGGGAGCTTGAATGTGACATGGAGTCCATTATCCGTAGTGAACCATGGATGCT  
GATGGGTTGGATTTAACTTTGATTCCCTCATCTCCACACAGAACGTTGTTGGTTTGAAC  
GTGGGGAACCTCACTGGTGCTAAGCAGGCCTCATCTCAGAGCTGGGTGCCAGGC

>Flycatcher\_FOXO3a

ATGGTCCGCTGCGTGCCTACTTCAAGGACAAGGGCGACAGCAACAGCTCGGCCGGGTGG  
AAGAATTCGATCCGGCACAACCTGTCACTCCACAGCCGATTCGTCAGGGTGCAGAATGAA  
GGCACTGGGAAAAGCTCTTGGTGGATGATCAATCCAGATGGTGGAAAAGGCGGCAAGGCG  
CCCCGGAGACGCGCTGTGTCAATGGACAACAGCAACAAGTACACCAAGAGCAGAGGGCGG  
GCAGCAAAGAAAAGGCAGCCCTGCAGACAGCCCAGGAGACGAGCGAGGACAGCCCTTCC  
CAGCTCTCCAAGTGCCGGGGAGTCCCACCTCCCGCAGCAGCGACGAGCTGGATGCGTGG  
ACGGATTTTCGCTCCCGTACAAATTCAAATGCCAGTACGATCAGTGGCCGCTTGTCAACC  
ATTTTGGCGAGACCCGAGCTCGATGATGTTCAAGATGACGATGCTCCACTTTCTCCCATG  
CTGTACAGTAGTCCATCAAGCTTGTCCCATCAGTAAACAAACCATGTAAGTGTGGAGTTG  
CCTAGGTTGACTGATATGGCTGGGACAATGAACCTTGAATGATGGACTGACTGATAACCTG  
ATGGATGATCTTTGGACAATATAACACTCCCTCCCTCCCAGCAGTCAACCCACAGGAGGG  
ATGATGCAGAGAAGCTCCAGTTTTCTTATGGTTCCAAAGTTTCAGGGCTGGGCTCCCCA  
TCAAGCAGTTTCAACAATGCTGTGTTGGGCCGTCGTCCCTGAATTCCTCCGCCAGTCA  
CCCATGCAGACGATTCAGGAGAACAAGCAGGCCACCTTCTCTTCCATTTCTCATTACAAC  
AACCAGACGCTGCAGGATCTCCTCACCTCTGACGCGCTGAGTCACAGCGATGTCATGATG  
ACACAGTCTGACCCACTCATGTCAACAAGCCAGCACAGCTGTGTCCGCCAGAATTCCCGC  
AGGAATATAATGCTCCGCAACGACCCCATGATGTCGTTTGCCGCGCAGTCCAGCCAGGGC  
GGTCTGGTCAATCAGAACCTGTCCCATCACCAGCACCAGTCCCACAGCTCCTCTCTCAGC  
GGCAGCCGTGCCTTGTCCAATTCCATCAGTAACATAGGCTTGAGTACTCCAACAGCTTG  
GGATCCTCCAAACATCAGCAGTCACTGTCAATCAGTCTATGCAAACACTTTCTGACCCG  
CTGTCAGGCTCCTCTTTGACTCTAGCGTGAACCTCCCGGTGATGGGGCATGAGAAATTC  
CCGAGTACTTGGACCTGGACATTTTCAACGGGAGCCTGGAGTGTGACATGGAGTCCATT  
ATCCGCAGTGAACCTCATGGATGCTGATGGGCTGGATTTAATTTGATTCCCTCATCTCA  
GCTCAGAACGTTGTGAGTCTGAATGTGGGGAACCTCACTGGTGCTAAACAGGCTTCATCA  
CAGAGTTGGGTACCAGGC

>tropical\_clawed\_frog\_FOXO3a

ATGGCAGAAGCCGTGCCTTCCCTCTCCCCGCTGGGGACGTGGACATAGACCCGGACTTC  
GAGCCGCAGAGCCGACCCCGTCTGCACGTGGCCCTGCAGAGACCCGGACTCCCAAGGC

AGCCCGGGCAAGCCGAATAGTGGCGCTGGGGAAGCCGGAGACGCGTCCTCTATGATCCCG  
GAGGAGGAGGATGATGACGATGAGGGATCTGGTACTACAGCCACTATGGTAGGGACAGCG  
GGGAGAAGGGGACTGTGGTCTACTGAGCGGAGGAGACCTGACCGTGCTGGCGTCACCT  
GTTGGTGGGGTGGAAACTGCAGGCTTCGCTTGGGGGTGGGGGAGCAGGGGGCGCCAG  
AGTGGCGCAACCGGACAGCAACAGAGGAAATGTTTCATCCCGCAGAAATGCCTGGGGCAAC  
ATGTCCTACGCTGACCTTATCACTAGGGCCATCGAGAGCTCCCAGGATAAACGGCTCACC  
CTGTCCCAGATATATGATTGGATGGTCCGCTCAGTGCCCTACTTCAAGGATAAGGGAGAC  
AGCAACAGCTCTGCAGGATGGAAGAATTCAATCCGGCATAATCTGTCACTACACAGCAGG  
TTTATTAGAGTTCAGAATGAGGGCTCTGGCAAAGCTCTTGGTGGATGATCAACCCTGAA  
GGAGGAAAAGGGGGGAAGGCACCAAGAAGACGGGCTGTTTCAATGGACAATAGCAACAAA  
TACACCAAGAGCCGTGGGAGAGCAGCAAAGAAAAAAGCGTCTTTGCAGGCATCTACTGAT  
GCTACAGATGATAGCCCTTCGAGCTGTCAAAGTGGCCAGGTAGTCCCACCTCACGTAGT  
AGTGATGAACTTGATGCCTGGACAGATTTTCGATCTCGTACAAACTCTAATGCCAGTACC  
ATAAGTGGTCGTTTGTCTCCAATCCAGCTACAACCTGAACTTGATGATGTTCAAGATGAT  
GACTCTCCCTTGTCCTATGTTGTATAGCAGCCCAGGTAGTTTGTCCCCTCTTTAAGT  
AAACCATGCACAGTGGAGATGCCAAGAATAACAGATATGGCTGGAACCATGAACTTAAAT  
GATGGATTGCCAGAGAACCTCATGGATGACTTGCTGGATGACATTTCTCTCACTTCTTCA  
CAGCAGTCATCTCCCGGTATCCTCATGCAGAGAAGTCCAGCTTTACATATGGCACTAAG  
GGCTCAGGCATTGGCTCTCCATCTAATACTTTTAAACAACACTAGTAGCTTCAACTTTCCC  
TTGACATCGCTGCGCCAGTCTCCCATGCAAACCTATCCAAGAGAACAAGCAAGCTACTTTT  
TCTTCCATTAATCATTACAGTAACCAGTCTTTGCAAGACCTGTTGAATACAGACACCCTC  
AGCCACAGTGATGTGTTAATGACCCAGTCTGATCCACTCATGTCACAAGCCAGTACTGCT  
GTGACTGCTCAGAATACCAGAAGAAATATAATTCTGAGAAATGACCCTATGATGTCTTTT  
GCAGCCCCATCTAACCAAGGAGGAAATTTGGTTAATCAGAACTCGCTGCACCAACAGCAG  
TCTCTTAACTCTTTTCAAGGTGGCAGCCGTGCCTTGTCAAACAATTTAAGCAACACTGGT  
TTAAATGATAGCAGCAACTTGGACTCAACCAACACCAGCAGCAGTCCTCAGTTAGTCAT  
TCTATGCCAACCATCTCAGACACGCTCTCAGGATCCTTGACTCCTCAGCCGTGAACCTT  
CCAACACTGGGGCATGAAAAGTTTCCACTGATTTGGACCTGGATATTTTCAATGGGAGT  
TTGGAATGTGACATGGAGACAATAATTCGCAACGATTTAATGGATGCAGATGGGTTGGAT  
TTTAAATTTGACACCCTCATCTCAGCTCAGAATGTCAGTCTATCGGTGGGCAGTTTCACT  
GGTGCTAAGCAGACATCGTCACAGAGCTGGGTGCCAGGC

>Fruitfly\_FOXO3a

ATGATGGACGGCTACGCGCAGGAATGGCCAGGCTGACCCACACAGATAACGGCCTGGCC  
ATGGACCAGCTGGGCGGGGATCTGCCCTGGACGTGGGCTTCGAGCCACAGACCCGGGCC  
AGATCCAACACATGGCCATGTCCGCGTCCCGAAAACCTTGTGGAGCCCACCGACGAGTTG  
GACAGTACAAAGGCCAGCAATCAGCAGTTGGCCCCAGGAGACTCACAGCAGGCTATACAG  
AATGCGAATGCAGCCAAGAAGAAGTATCGCGTCGCAATGCATGGGGAAATCTATCCTAT  
GCGGATCTCATCAGCATGCCATTGGATCGGCCACCGACAAACGATTGACACTGAGTCAG  
ATTTACGAGTGGATGGTCCAGAATGTGCCATATTTCAAGGACAAGGGCGATTGAATAGC  
AGTGCCGGATGGAAGAACTCCATACGTCACAATCTGTGCTGCACAACCGCTTTATGAGG  
GTCCAAAACGAGGGCACCGCAAGTCATCCTGGTGGATGCTCAACCCGGAGGCCAAGCCC  
GGCAAGTCTGTGCGCCCGCTGCCGCTTCATGGAGACGTCCCGGTACGAGAAGCGGCGC  
GGCAGGGCCAAGAAGCGGGTGGAGGCACTGCGTCAGGCGGGCGTGGTGGGCCTCAACGAT  
GCCACGCCCTCGCCAGCAGCAGCGTCAGCGAGGGGCTGGATCACTTTCCCGAGAGTCCG

CTCCACAGTGGCGGTGGCTTCCAATTATCGCCCGATTTCCGGCAACGCGCCTCATCCAAT  
GCCAGTTCCTGCGGACGCCTGAGCCCCATTAGGGCGCAGGATCTTGAGCCCGACTGGGGA  
TTCCCCGTTGACTACCAGAACAACAACGATGACGCAGGCCACGCCAGGCGCTCGAGGAG  
CTGACGGGCACAATGGCGGATGAGCTGACGCTGTGCAACCAGCAGCAGCAAGGGTTCAGT  
GCCGCCTCGGGACTTCCCTCTCAGCCCCCGCCCCGCCCTATCAGCCGCCGAGCATCAA  
CAGGGCAGCAGCAGCAACAGCAGCAGTCGCCCTACGCCCTAACGGCCCCGCCTCCGGC  
TACAACACGCTGCAGCCGAGTCGCAGTGCCTGCTGCACCGGTCCCTCAATTGCAGTTGC  
ATGCACAATGCAAGAGATGGTCTCTCGCCGAACTCAGTAACCACAACAATGTGCCCCGCC  
TATCCAAACAGCGAGCCCTCATCGGACTCCCTGAACACGTACAGCAACGTGGTGCTCGAT  
GGTCCGGCGGACACTGCGGCACTGATGGTGCAGCAGCAGCAGCAGCAGCAACAGCAA  
CAGCTGTCCGCCAGCTTGAAGGACAATGCCTGGAGGTGCTCAATAACGAGGCGCAGCCG  
ATAGACGAATTAATCTGGAGAACTTTCCCGTGGGCAATCTCGAGTGCAATGTCGAGGAG  
CTGCTGCAGCAGGAGATGAGCTACGGCGGCCTGCTGGACATCAATATACCGCTGGCCACG  
GTCAACACGAACCTGGTCAACAGCAGCAGTGGGCCCTGAGCATCAGCAACATTAGCAAC  
CTCAGCAACATAAGCAGCAATTCCGGCAGCAGTCTCAGTCTGAATCAGTTGCAGGCTCAG  
CTGCAACAGCAGCAGCAGCAGCAGGCGCAGCAACAGCAGCAGGCGCAGCAGCAACAA  
CAGCAGCATCAGCAGCACCAGCAACAGTTGCTGTAATAATAACAACAACAGCAGCAGC  
AGCCTGGAATTGGCAACACAACGGCTACCACAAATCTGAATGCTCGGGTTCAGTACTCA  
CAGCCCAGCGTGGTGACCTCGCCACCATCCTGGGTGCAC

>Fugu\_FOXO3a

ATGGCTGAGGCGCCGTGCAACGAGCCTCCCTCCAACATCGAGATCGACCCGGATTTGAG  
CCCCAGAAGCGGCCACGCTCCTGTACTTGCCCCCTTCCCCGTCCGGAGTCTGGTGCGGGC  
AAACCCGGGACTAATGACTGACGTAATCCCCGAAGAGGAGGACGATGAGGGTGGCAGC  
TCGGGCAGTGGCGATGCTCAGAAAACCAGCGGTGCCATTAACATTAACCCCGGGAGTCG  
GGCAGGAGCTCCGCTTCTCAGCCCGTGGAGCTCCAGCGCGGACCCTGCAAGGAGGAGGCC  
GCCGATGGCTCGCCCTCCTCCGCACAGACCCCCGCCGCTGCCGCTCTCAGTACCTCTGCG  
TCCCAGCAGCTGAGGAAGTCTCTGCCCGTCCGAAACGCATGGGGCAACTACTCCTATGCA  
GACCTCATTACGCAAGCCATCGAGAGCTCCCCGAGAAGAGGCTGACCTTGTCCCAAATC  
TATGACTGGATGGTGAGGTCTGTGCCATATTTCAAGGACAAAGGCGACAGCAATAGCTCT  
GCTGGCTGGAAGAATTCCATCCGACACAATCTGTCCCTTACAGCCGATTTGTGAAAGTC  
CAGAATGAAGGAAGTGGAAAAAGCTCCTGGTGGATGGTCAACCCCGAGGGTGGGAAAGGA  
GGCAAAGCTCCAAGACGAAGGGCCGTATCCATGGATAACAGCAAGTACATTAAGGAGCC  
CGAGGACGTGCCACCAAGAAGAAAGCCTTGCTGCAGGCTGCTCAGGACGGCAGCTCGGAA  
AGCTCCTCCAGCCTCTCAAATGGACAGGAAGTCCACATCCCGCAGTAGCGACGAGCTG  
GATGCCTGGACAGACTTCCGCTCCCGGACCAATTCTAACGCCAGCACGCTCAGTGGTCTG  
CTGTCCCCGATCTTGCCAACCTGGAGCTTGACGAGGTGCCGATGATGACTCGCCCCCTT  
TCTCCCATGTTGATTCCAGTCCCAGCAGCATGTCCCCGTCCACTGGGCCACAGTGCTG  
TCTGATTTAGCGGGCAGATGAACCTCAATGATGGGCTTTCCGACAACCTGATGGATGAC  
CTTTTAGACAATATCAGCCTGACCGCAACCCAGCCGCTTCTCCTGGAGAGGAAGAAAAT  
GACAGTCAGGGGACCTCTGTTTTTACCTTTGGCTGCTCAGGAAGCGGTCTAGGTAGCCCT  
TCGGGCAGCTATGGGCCTAACCTCTCTTAGCCCTCCGTCCATCACAAGCCTGCGGCAG  
TCGCCCATGCAGACCATCCAGGAGAACAAAGCAGACCACCTTCTCCTCCATCTCGCACTTC  
AGTGACCACCAGACCCTCCAGGATCTGCTGAGTTTGACTCCCACAGCCATAGCAATGTC  
ATGCTACCCAGTCGGACCCACTGATGTCACAGGCCAGCACTGCCATCGCCCTGCAGAAC

TCCGCGGAATGCTATGCTTCTCCGTAAAGACCCCGCCTCGGTGAATCACGCCGGTGCA  
GGTCAGGCTCAAAGCGCTTCAGTGCCTGGTTGGCAAGCTGGCTTGCAACCCCTGATGAA  
AACGGTGGCCGCAACAATGCCAAGCAGCCACACCTGAAGTCTCCAGCAAGAATGCCTCT  
ATGCAGCTCGGCTCTGGTTTTCCAGCCAGGATCGCTTTCCACCGATCTGGACCTCGAT  
GTGTTCAACAGCAGCCTCGAGTGTGACATGGACGCCATCATCCGGAATGAACTGATGGAC  
GCGGATTGCCTGGACCTCAGCTTTGACTCTCGCCTCGCCTCCACCCAGAATGGTAACAAG  
AATTCAGGAAGCTTCTCCGGCTCAAAACCAACGTCCCCTCACAGCTGGGTCCCAAGC

>Anole\_lizard\_FOXO3a

ATGGCAGAGCCGTCTCCGCCGTCGCCGCTGGACGTGGAGCTGGACCCGGACTTCGAGCCC  
CAGAGCCGCCCGGGTCTGCACGTGGCCCTGCAGAGGCCCGAGCTGCAGGCCAGCCCCG  
GAGGGGGGAGGCGGCGCCCCGGCGGAGACGCGATGATCCCCGAGGAGAAGGACGACGAC  
GAGGACGACGACGAGGAGCCCGGGCCCCGGCGGCGGAGGAGGGCCAGGAGGAGGCC  
GCGGCCGCCCTTCCCCGCGGGCCCCAAGCAGCAGCTCCAGCAGCCCTCCTCGCCACAA  
GCGGCCCGCCACTGCCGCCCTCCGCTCAGGCGGCTCCGCGAAGTGCTCCTCCCGG  
CGCAACGCCTGGGGAACTCTCTTACGCGGACCTCATCACCCGCGCCATCGAGAGCGCG  
CCCCGAGAAGCGCTCACCTGGCGCAGATCTACGAGTGGATGGTGCCTGCGTGCCTAC  
TTCAAGGACAAGGGCGACAGCAACAGCTCCGCCGGTGGAAAGAACTCCATCAGACACAAC  
TTGTCCCTCACAGTCGATTCATCAGGGTACAGAATGAAGGAACCGGGAAAAGCTCGTGG  
TGGGTGATCAACCCAGATGGAGGGAAAGGTGGGAAAGCGCCACGGAGACGTGCTGTCTCA  
ATGGACAACAGTAACAAGTATACAAAGAGCCGAGGACGGGCAGCCAAGAAAAAAGCATCT  
CTACAAGCTGCACAAGAAACCACGGAAGACAGCCCCACCCAGCTCTCAAGTGGCCAGGT  
AGCCCCACGTACGCAGCAGTGAAGTGAAGCATGGACAGATTTCCGGTCCCGTACA  
AACTCAAATGCTAGTACCATAAGTGGCCGCTTGTCTCCAATCTTGGCAAGTACTGAGCTA  
GATGAAGTCCAGGACGATGATGCTCCGCTTCCCCATGCTGTATAGTAGCCCGCCAGC  
ATGTCTCCATCGGTAAACAAACCCTGTAACGTAGAGTTGCTAGGTTGACGGATATGGCA  
GGCACCATGAACTTGAATGATGGCCTGACAGATAACCTTATGGACGATCTTCTGGACAAT  
ATAAGTCTCCCCCTTCCAGCAGTCTCTACAGGGGTCTCATGCAGAGAAGCTCAAGT  
TTCCATACAGCTCAAAGGTTGAGTCTTGGTTCTCCATCGAGTACTTTCAACAATGGT  
GTGTTTGGGCCATCATCTCTGAATCCCTCCGTCAGTCTCCATGCAAACCATCCAAGAG  
AACAAGCAAGCAACATTTTCTCCATTTCTCACTACAATAACCAAACGCTGCAGGATCTG  
CTGGCATCAGATTCGCACAGCCACAGTATGTCATGATGACTCAGTCCGATCCACTCATG  
TCGCAGGCTAGCACAGCTGTGGCTGCCAGAACGTGCGCAGGAGTATTATGCTGCGGAAT  
GATCCAATGATGTCATTTGCTGCGCAACCAAGCCAGGGTAGTTTGGTCAACCAGAACCTG  
CTCCACCACCAGCATCAATCCCAGAATCCTCTCTCAGTGGCAGTCGTGCCTTGTGCAAT  
TCCGTCGGTACTATGGCTTAAGTGAAGTCAACAGCATTGGGCCGGCAAAACACCAGCAA  
CAGTCGCCTGCCAACCCTCTATGCAATCCCTTTCTGACTCACTCTCAGGCTCTTCATTG  
TATTCCAACAGCCTGAGCCTTCCAGTCATGGGGCATGATAAATTTCCAGTGATTTGGAT  
CTGGATATTTTCAATGGGAGCTTGAATGCGATATGGAGTCCATTATCCGCAGTGAAGT  
ATGGATGCAGATGGGTTGGATTTAACTTTGATCCCTGATCTCAGCCCAGAATGTTGTC  
ACTCTGAATGTGGGAACTTCACTGGTGCTAAGCAAGCTTCATCACAGAGTTGGGTTCCA  
GGC

>Horse\_FOXO3a

ATGCGGGTCCAGAACGAGGGGACGGGCAAGAGTTCTTGGTGGATCATCAACCCTGATGGG  
GGCAAGAGCGGGAAGGCACCACGGCGGGCTGTCTCCATGGACAACAGCAACAAGTAT



ACCAAGAGCCGTGGCCGCGCAGCCAAGAAGAAGGCAGCCCTGCAGACAGCCCCTGAGTCA  
GCAGATGACAGTCCCTCCCAGCTCTCCAAGTGGCCCGCAGCCCCACGTACGCAGCAGC  
GATGAGCTGGATGCATGGACGGACTTCCGCTCACGCACCAATTCCAATGCCAGCACTGTC  
AGCGGCCGCTGTACCCATCTTGCAAGCACAGAGTTGGATGACGTCCAGGATGATGAT  
GCCCCGCTCTCCCCATGCTCTATAGCAGCTCAGCCAGCCTGTCACCCTCTGTAAGCAAG  
CCATGCACCGTGGAGCTGCCACGGCTGACCGACATGGCGGGCACCATGAATCTGAATGAT  
GGGCTGGCTGACAACCTCATGGAGGACCTGCTGGATAACATCACGCTCCCATCCTCCCAG  
CCATCGCCCCCTGGAGGGCTCATGCAGCGGAGCTCTAGCTTCCATACACCACCAAGGGC  
TCCGGCCTGGGCTCTCCACCAGCTCCTTAAACAGCACGGTGTGGACCCTCGTCTCTG  
AATTCTCTGCGTCAGTCGCCCATGCAGACCATCCAAGAGAACAAGCCAGCTACCTTCTCT  
TCCATGTCACACTATGGCAACCAGACTCCAGGACCTGCTCACTTCGGACTCACTCAGC  
CACAGTGATGTCATGATGACCCAGTCGGACCCCTTGATGCTCAGGCCAGCACCGCTGTG  
TCCGCCCAGAACTCCCGCCGGAACGTGATGCTTCGCAACGACCCAATGATGTCCTTTGCT  
GCCAGCCTAACCAAGGGAGTTTGGTCAATCAGAACTTGCTCCACCACCAGCACCAAACC  
CAGGGCGCTCTCGGTGGCAGCCGTGCCTTGTGAATTCCGTCAGCAACATGGGCTTGAGC  
GACTCCAGCAGCCTTGGGTGAGCCAAACACCAGCAGCAGTCTGTCAGCCAGTCTATGCAA  
ACCCTCTCAGACTCTCTCAGGCTCCTCCTTGTACTCAACTAGTGCAAACCTTCCCGTC  
ATGGGCCATGAGAAGTTCCCCAGTACTTGGACCTGGACATGTTCAATGGGAGCTTGGAA  
TGTGACATGGAGTCCATTATCCGTAGTGAACCTCATGGATGCTGATGGGTTGGATTTAAC  
TTTGATTCCCTCATCTCCACACAGAACGTTGTTGGTTGAACGTGGGGAACTTCACTGGT  
GCTAAGCAGGCCTCATCTCAGAGCTGGGTGCCAGGC

>Human\_FOXO3a

ATGGCAGAGGCACCGCTTCCCCGGCCCCGCTCTCTCCGCTCGAAGTGGAGCTGGACCCG  
GAGTTCGAGCCCCAGAGCCGTCCGCGATCCTGTACGTGGCCCTGCAAAGGCCGGAGCTC  
CAAGCGAGCCCTGCCAAGCCCTCGGGGGAGACGGCCGCGACTCCATGATCCCCGAGGAG  
GAGGACGATGAAGACGACGAGGACGGCGGGGGACGGGCCGGCTCGGCCATGGCGATCGGC  
GGCGGCGGGGAGCGGCACGCTGGGCTCCGGGCTGCTCCTTGAGGACTCGGCCCGGGTG  
CTGGCACCCGAGGGCAAGACCCCGGGTCTGGGCCAGCCACCGCGGGCGGGGCTGAGC  
GGGGGTACACAGGCGCTGCTGCAGCCTCAGCAACCGCTGCCACCGCCGACCCGGGGGCG  
GCTGGGGGCTCCGGGCAGCCGAGGAAATGTTGTCGCGGGCGGAACGCCTGGGGAAACCTG  
TCCTACGCGGACCTGATACCCGCGCCATCGAGAGCTCCCCGGACAAACGGCTCACTCTG  
TCCCAGATCTACGAGTGGATGGTGCCTTGCCTACTTCAAGGATAAGGGCGACAGC  
AACAGCTCTGCCGGCTGGAAGAATCCATCCGGCACAACCTGTCACTGCATAGTCGATTC  
ATGCGGGTCCAGAATGAGGGAACTGGCAAGAGCTCTTGGTGGATCATCAACCCTGATGGG  
GGGAAGAGCGGAAAAGCCCCCGGGCGGGGCTGTCTCCATGGACAATAGCAACAAGTAT  
ACCAAGAGCCGTGGCCGCGCAGCCAAGAAGAAGGCAGCCCTGCAGACAGCCCCGAATCA  
GCTGACGACAGTCCCTCCCAGCTCTCCAAGTGGCCTGGCAGCCCCACGTACGCAGCAGT  
GATGAGCTGGATGCGTGGACGGACTTCCGTTACGCACCAATTCTAACGCCAGCACAGTC  
AGTGGCCGCTGTCGCCATCATGGCAAGCACAGAGTTGGATGAAGTCCAGGACGATGAT  
GCGCCTCTCTCGCCATGCTCTACAGCAGCTCAGCCAGCCTGTCACCTTCAGTAAGCAAG  
CCGTGCACGGTGGAACTGCCACGGCTGACTGATATGGCAGGCACCATGAATCTGAATGAT  
GGGCTGACTGAAAACCTCATGGACGACCTGCTGGATAACATCACGCTCCCGCCATCCCAG  
CCATCGCCCACTGGGGGACTCATGCAGCGGAGCTCTAGCTTCCCGTATACCACCAAGGGC  
TCGGGCTGGGCTCCCCAACAGCTCCTTAAACAGCACGGTGTTCGGACCTTCATCTCTG

AACTCCCTACGCCAGTCTCCCATGCAGACCATCCAAGAGAACAAGCCAGCTACCTTCTCT  
TCCATGTCACACTATGGTAACCAGACACTCCAGGACCTGCTCACTTCGGACTCACTTAGC  
CACAGCGATGTCATGATGACACAGTCGGACCCCTTGATGTCTCAGGCCAGCACCGCTGTG  
TCTGCCCAGAATCCC GCCGGAACGTGATGCTTCGCAATGATCCGATGATGTCCTTTGCT  
GCCCAGCCTAACCAGGGAAGTTTGGTCAATCAGAACTTGCTCCACCACCAGCACCAAACC  
CAGGGCGCTCTTGGTGGCAGCCGTGCCTTGTCGAATTCTGTCAGCAACATGGGCTTGAGT  
GAGTCCAGCAGCCTTGGGTGAGCCAAACACCAGCAGCAGTCTCCTGTCAGCCAGTCTATG  
CAAACCTCTCGGACTCTCTCTCAGGCTCCTCCTTGTACTCAACTAGTGCAAACCTGCCC  
GTCATGGGCCATGAGAAGTTCCCAGCGACTTGACCTGGACATGTTCAATGGGAGCTTG  
GAATGTGACATGGAGTCCATTATCCGTAGTGAACCTCATGGATGCTGATGGGTTGGATTTT  
AACTTTGATTCCCTCATCTCCACACAGAATGTTGTTGGTTTGAACGTGGGGAACCTCACT  
GGTGCTAAGCAGGCCTCATCTCAGAGCTGGGTGCCAGGC

>Macaque\_FOXO3a

ATGGCAGAGGCACCGCCTCCCCGGCCCCGCTCTCTCCGCTGGAAGTGGAGCTGGACCCG  
GAGTTTCGAGCCCCAGAGCCGTCCGCGCTCCTGTACGTGGCCCCTGCAAAGGCCGGAGCTC  
CAAGCGAGCCCTGCTAAGCCCTCGGGGGAGACGGCCGCCACTCCATGATCCCCGAGGAG  
GAGGACGATGAAGACGACGAGGACGGCGGGGACGGGCCGGCTCGGCCATGGCGATCGGC  
GGCGGGGGAGCGGCACGCTGGGCTCCGGGCTGCTCCTTGAGGACTCGGCCGGGTGCTG  
GCACCCGGAGGGCAAGACCCCGGTCTGGGCCAGCCACCGCGGGCGCTCTGAGCGGG  
GGTACACAGGCGCTGCTGCAGCCTCAGCAGCCGCTGCCACCGCCGAGCCGGGGGGCGCT  
GGGGGCTCCGGGAGCCGAGGAAATGCTCGTCGCGGCGGAACGCCTGGGGAAACCTGTCC  
TACGCGGACCTGATCACCCGCGCCATCGAAAGCTCCCCGGACAAACGGCTCACTCTGTCC  
CAGATCTACGAGTGGATGGTGCCTTGCCTACTTCAAGGATAAGGGCGACAGCAAC  
AGCTCTGCCGGCTGGAAGAACTCCATCCGGCACAACCTGTCGCTGCATAGTCGATTCATG  
CGGGTCCAGAATGAGGGAACCTGGCAAGAGCTCTTGGTGGATCATCAACCCGGATGGGGGG  
AAGAGCGGAAAAGCCCCCGCGGGCGGGCTGTCTCCATGGACAACAGCAACAAGTATACC  
AAGAGCCGTGGCCGCGCAGCCAAGAAGAAGGCAGCCCTGCAGACAGCCCCTGAATCAGCT  
GACGACAGTCCCTCCAGCTCTCAAGTGGCCTGGCAGCCCCACGTACGCAGCAGTGAT  
GAGCTGGATGCGTGGACGGACTTCCGTTACGCACCAATTCTAACGCCAGCACAGTCAGT  
GGCCGCTGTGCGCCATCATGGCAAGCACAGAGTTGGATGAAGTCCAGGACGACGATGCA  
CCTCTCTCGCCATGCTCTACAGCAGCTCAGCCAGCCTGTACCTTCAAGTGAACAAGCCA  
TGCACGGTGGAACTGCCACGGCTGACTGATATGGCAGGCACCATGAATCTGAATGATGGG  
CTGACTGAGAACCTCATGGACGACCTGCTGGATAACATCACGCTCCCGCCATCCCAGCCA  
TCACCCACTGGGGGACTTATGCAGCGGAGCTCTAGCTTCCCATACACCACCAAGGGCTCG  
GGCCTGGGCTCCCCAACCAGCTCCTTCAACAGCACGGTGTGGGACCTTCTCTGTAAC  
TCCCTACGCCAGTCTCCCATGCAGACCATCCAAGAGAACAAGCCAGCTACCTTCTCTTCC  
ATGTCACACTATGGTAACCAGACACTCCAGGACCTGCTCACTTCGGACTCACTTAGCCAC  
AGCGATGTCATGATGACACAGTCGGACCCCTTGATGTCTCAGGCCAGCACCGCTGTGTCT  
GCCCAGAATCCC GCCGGAACGTGATGCTTCGCAATGACCCAATGATGTCCTTTGCTGCC  
CAGCCTAACCAGGGAAGTTTGGTCAATCAGAACTTGCTCCACCACCAGCACCAAACCCAG  
GGCGCTCTTGGTGGCAGCCGTGCCTTGTCGAATTCTGTCAGCAACATGGGCTTGAGTGA  
TCCAGCAGCCTTGGGTGAGCCAAACACCAGCAGCAGTCTCCTGTCAGCCAGTCTATGCAA  
ACCCTCTCGGACTCTCTCAGGCTCCTCCTTGTACTCAACTAGTGCAAACCTGCCCCGTC  
ATGGGCCATGAGAAGTTCCCAGCGACTTGACCTGGACATGTTCAATGGGAGCTTGGAA

TGTGACATGGAGTCCATTATCCGTAGCGAACTCATGGATGCTGATGGGTTGGATTTTAAC  
TTTGATTCCCTCATCTCCACACAGAATGTTGTTGGTTTGAACGTGGGGAACCTCACTGGT  
GCTAAGCAGGCTTCATCTCAGAGCTGGGTGCCAGGC

>Medaka\_FOXO3a

ATGGCCGAGGCCCGCTTCCCACGCGCTACCGGACTTGGACGTGGCCATCGACCCGGAC  
TTTGAGCCTCAAAGCGGCCAGATCCTGCACTTGGCCGCTTCCACGGCCGGACTCCGCT  
GCGGTGAAGCCGGAGAGCAACGACACAGATATTATACCGGAGGAGGAAGACGATGAGGAG  
GATGCTACCCCCACAGCTGCACGCGTCAACGGCTCCGTTGCAGCCGCGGAGGACCAGAGC  
AGCAACAGCCCCGTGGGTGATGGAGCGCTGCCTTCCCCGGTCAAGAGAGCGGAGGCTCG  
CCGCTCTCCTCGCACTCCCCGGCGGCCACCTCCGGCGCCTTGACTCCCAGCGGCTTGCT  
GCAGCGCAGACCCGAGGAAGACCTCCTCCCGCCGCAACGCCTGGGGGAACCTCTCTAC  
GCCGACCTGATCACCCAGGCCATTGAGAGTTCGCCCGAGAAGAGGCTGACTCTGTCCCAG  
ATTTATGACTGGATGGTGAGATCCATCCCCTACTTCAAAGACAAAGGCGACAGCAACAGC  
TCTGCGGGATGGAAGAACTCCATCCGGCACAACCTCTCCCTCCACAGTCGGTTCATTGCG  
GTCCAAAACGAAGGGACAGGAAAGAGTTCCTGGTGGATGATCAATCCGGAAGGAGGAAAA  
GGCGGCAAGGCTCCAAGACGTGCGGGCTGTTTCCATGGACAACAGCAACAAGTACACCAAG  
TCCGCCCGTGGTCTGTCTGTAAGAAAAAGGCTGCACTGCAGGCTGCTGTGCCGAGCA  
GGTGAAGGTGGTGGAGACAGTCTTCAGGTCTTTCAGGTGGCCTGGGAGTCCAACATCC  
CACAGCACAGAGGAGCTTGATGGTGGATGGACAGATTTCCGCTCTCGCACCAACTCCAAT  
GCCAGCACTGTTAGTGGCCACCTCTACCCATTATGGCCAACCCTGAACTTGACGAAGTA  
CCCAGTATGAGGCTCTCTCTCCCCATGATCTACTCCAGTCTGGCAGGGCGCTGTCT  
CCTGGAAATGCCATATCCAACGGGAAAGCAGCCCTGCTGAGCTGCCCCGCCTAGCGGAC  
CTGACAGGTACGATGAACTGAATGATGGAATCACAGATGAACTGATGGACGATTTGCTT  
GACAACATCAAGTTGGTACCACCTTCTCCAGCCAGAACCTCCAAAATGGCTCTTCAGGC  
TTCACTTTTGGGTCCAAATCCAATGGAATAAGCTTAACTTCTCCACATCCTCTCCATCG  
TCCAACCTTTCATCTAATGGTGGAAAGTAATGGTTACAGTAACTCCATCTTTGGCTCCCAA  
GCAATAGGTTCTCTCTGCGCTCCTCCCCAATGCAAACCATCCAGGAGAACAAGCAAACA  
TCTTTCTCCAGCATCAGCATGTCTGGTTTTGGCAGCCAAACACTACAAGACCTGCTTAAC  
TCTGGTAGTCAACAACCATAGTATGATGTGATGATGACCCAGTCTGACCCTTTGATGTGCAA  
GCCAGCTCAGCTGCTGTCAATTCCAAACCTCCCGCCGTGGTCTGATCCTCCGTAACGAT  
CCTGTGATGACCTTTGGGACCAGTGGAGGTATTCAAGCCAGCCAGAGGGACGTGCTACAA  
ACTAACAACCAAAACAGAGCTCCATGAGGTCAAGAAATGGAGGTCTGAACCTCGTCAAC  
GAGGCTAATACTCTGGCTAATGCTAAACAGCAGCTCCTGCTCTACCATTAGGAGGAAAT  
GGTTCGTCCACCATGCAGATCGACCCCTCCATCTTTCTAACGGCACCGTCAGCAGCAGC  
GGAGGAGTTTCTCAGGATCGCTTCCCCACCGATCTGGACCTGGACATATTCAACGGCAGC  
CTGGAGTGTGACATGGACTCCATCATCAGAAACGACCTGATGGATGCAGATGGCCTGGAT  
TTAACTTTGACTCTCTGGTAAACATGAACGGAGTAAGCAACTTCACGAGCACCAAGCAG  
AGCTCTCAGAGCTGGGTACCTGGC

>Mouse\_FOXO3a

ATGGCAGAGGCACCAGCCTCCCCGGTCCCGCTCTCTCCGCTCGAAGTGGAGCTGGACCCA  
GAGTTCGAGCCACAGAGTCGGCCACGCTCCTGTACGTGGCCCTGCAGAGGCCGGAGCTG  
CAGGCGAGCCCGCCAAGCCCTCGGGGAGACGGCCGCACTCCATGATCCCCGAGGAG  
GACGACGATGAAGACGACGAGGACGGCGGCGGCGGAGCCAGCTCGGCCATGGTGTACGGT  
GGCGGCTGAGCAGCACGCTGGGTCCGGGCTGCTCCTCGAGGATTCGGCCATGCTGTCTG

GCTCCAGGAGGGCAGGACCTCGGGTCGGGGCCAGCGTCCGCCGCAGGCGCTCTGAGTGGG  
GGCACGCCGACGCAGCTGCAGCCTCAGCAGCCACTGCCACAGCCGCAGCCGGGGGGCGGCT  
GGGGGCTCTGGGCAACCAAGGAAATGCTCCTCGCGGCGGAATGCCTGGGGGAACCTGTCC  
TATGCCGACCTGATCACCCGCGCCATCGAGAGCTCCCCGGACAAACGGCTCACTTTGTCC  
CAGATCTACGAGTGGATGGTGCCTGTGTGCCCTACTTCAAGGATAAGGGCGACAGCAAC  
AGCTCTGCGGGCTGGAAGAACTCCATCCGGCACAACCTGTCCCTGCACAGCCGCTTCATG  
CGCGTTCAGAATGAAGGCACGGGCAAGAGCTCTTGGTGGATCATCAACCCCGATGGGGGA  
AAGAGCGGGAAGGCCCGGGCGGCGTGCGGTCTCCATGGACAACAGCAACAAGTACACC  
AAGAGCCGAGGCCGGGCAGCCAAGAAGAAGGCGGCCCTGCAGGCTGCCCCAGAGTCGGCA  
GACGACAGTCTTCCAGCTCTCCAAGTGGCCTGGCAGCCCCACGTCCCGCAGCAGCGAC  
GAGCTGGATGCGTGGACCGACTTCCGCTCGCGCACCAATTCCAACGCCAGCACCGTGAGC  
GGCCGCTGTGCCATCCTGGCAAGCACGGAGCTGGATGACGTCCAGGATGATGATGGA  
CCCCTGTCCCCATGCTGTACAGCAGCTCTGCCAGCTGTGCCCTCCGTGAGCAAGCCG  
TGTACTGTGGAGCTCCGCGGTGACGGACATGGCCGCACCATGAATCTGAATGATGGG  
CTGGCCGAGAACCTCATGGACGACCTGCTGGATAACATCGCGCTCCCGCCATCGCAGCCA  
TCGCTCTGGCGGGCTTATGCAGCGGGCTCCAGCTTCCCATATACCGCCAAGAGCTCC  
GGCCTGGGCTCCCCAACCGGCTCCTTCAACAGTACCGTGTGGACCTTCGTCTCTGAAC  
TCCTTGCGTCAGTACCCATGCAGACTATCCAGGAGAACAGACCAGCCACCTTCTCTTCC  
GTGTCACACTACGGCAACCAGACACTCCAAGACCTGCTTGCTTCCAGACTCACTCAGCCAC  
AGCGACGTCATGATGACCCAGTCGGACCCCTTGATGTCTCAGGCTAGCACCCCGGTGTC  
GCCAGAATGCCCGCGGAACGTGATGCTCGCAACGATCCAATGATGTCCTTTGCTGCC  
CAGCCTACCCAGGGGAGTTTGGTCAATCAGAACTTGCTCCACCACCAGCACCAAACCCAG  
GGCGCTCTTGGTGGCAGCCGTGCCTTGTCAAATTCTGTGCAACATGGGCTTGAGTGAC  
TCCAGCAGCCTTGCTCAGCCAAACACCAGCAGCAGTCTCCCGCCAGCCAGTCTATGCAA  
ACCCTCTCGGACTCTCTCAGGCTCCTCACTGTATTGAGCTAGTGCAAACCTTCCCGTC  
ATGGGCCACGATAAGTCCCCAGTGACTTGGACCTGGACATGTTCAATGGGAGCTTGAA  
TGTGACATGGAGTCCATCATCCGTAGTGAACCTCATGGATGCTGACGGGTTGGATTTAAC  
TTTACTCCCTCATCTCCACACAGAACGTTGTTGGTTGAATGTGGGGAACCTCACTGGT  
GCTAAGCAGGCCTCATCTCAAAGCTGGGTACCAGGC

>Naked\_mole\_rat\_FOXO3a

ATGGCAGAGACATCGGCCTCCCCGATCCCGCTCTCTCCTCCCGAAGTGGAGGTGGACCCC  
GAGTTTGAGCCCCAGAGCCGCCCGCTCTTGTACGTGGCCCCTGCAGAGGCCGGAGCTC  
CAGGCCAGCCCCGTAAGCCCTCGGGGGAGACGGCCCGGACTCCATGATCCCGGAGGAG  
GAGGACGATGAAGACGACGAGGACAGCGGCCGACCAGCTCGGCCATGGCGATCGGCGGT  
GGCGGGAGCGGAACCCTGGGCTCCGGGCTGCTTCTTGAAGACTCGGCCCGACTGCTGGCT  
TCCGGAGGGCAGGACTTCGGGTCCGGGCCAGCTCCCGCGGTGGGCGCGCTGAGCGGGGA  
ACCCAGACGCCGCTGCAGCCTCAGCAGCCACTGCCAGCGCCGAACCCGGGGCAGCTGGG  
AGCTCCGGGCAGCCGAGGAAGTGTCTTTCAGACGGAACGCCTGGGGAAACCTGTCTAC  
GCCGACTTGATCACCCGAGCCATCGAGAGCTCCCCGGACAAACGGCTCACTCTGTCCCAG  
ATCTACGAATGGATGGTGCATGTGTGCCCTACTTCAAAGACAAGGGCGACAGCAACAGC  
TCTGCGGGCTGGAAGAACTCTATCCGGCATAACTTGTCTCTGCACAGTCGATTCATGAGG  
GTCCAGAATGAGGGGACTGGCAAGAGCTCATGGTGGATCATCAATCCTGATGGGGGCAAG  
AGTGGCAAGGCTCCCCGGCGGGCGGGCCGTCTCCATGGACAACAGCAACAAGTATACCAAG  
AGCCGTGGCCGAGCAGCCAAGAAGAAGGCGGCCTTGCAGACTGCCCCAGAGTCTGCAGAT

GACAGTCCTTCCCAGCTCTCTAAGTGGCCTGGCAGCCCCACCTCACGCAGCAGCGACGAG  
CTTGATGCGTGGACGGACTTCCGTTACGTACCAATTCCAATGCCAGCACAGTGAGCGGC  
CGTCTGTACCCATCCTGGCAACCACAGAGCTGGATGATGTCCAAGATGACGATGCACCG  
CTCTCCCAATGCTCTACAGCAGCTCAGCCAGCCTGTACCCTCTGTAAGCAAGCCATGC  
ACCGTGGAGCTGCCACGGCTGACTGACATGGCAGGCACCATGAATCTGAATGATGGGCTG  
GCTGATAACCTCATGGATGACCTGTTGGATAACATCACGCTGCAGTCATCCCAGCCATCG  
CCCCTGGGGCGCTCATGCAGCGCAGCTCCAGCTTCCATACACCACCAAGGGCTCTGGC  
CTAGGCTCTCCAACCAGCTCCTTTAACAGCACAGTGTGGACCCTCGTCTCTGAACTCC  
TTGCGCCAGTCTCCATGCAGACCATCAAGAGAACAAGCCAGCCACCTTCTTTCCATG  
TCACACTATGGCAACCAGACACTCCAAGACCTGCTCACTTCTGACTCGCTCAGCCACAGC  
GATGTCATGATGACTCAGTCAGATCCCTTGATGTCCCAGGCCAGCACTGCTGTGTCTGCC  
CAGAACTCCCGCCGAATGTGATGCTTCGCAATGACCCAATGATGTCCTTTGCTGCCAG  
CCTAATCAGGGGAGTTTGGTCAATCAGAACTTGCTCCACCACCAGCACCAACCCAGGGC  
GCTCTAGGTGGCAGCCGTGCCTTGTGCAATTCTGTGCAACATGGGCTTGAGTGACTCC  
AGCAGCCTCGGGTCAGCCAAACACCAGCAGCAGTCTTGTGTCAGCCAGTCTATGCAAACC  
CTCTCGGACTCCCTCTCAGGCTCTTCTTGTACTCAGCTAGTGCAAACCTTCCCGTCATG  
GGCCATGAGAAGTTCCCGAGCGACTTGGACCTGGACATGTTCAATGGGAGCTTGGAAATGT  
GACATGGAGTCCATTATCCGAAGTGAACCTATGGATGCAGATGGGTTGGATTTAACTTT  
GATTCCTCATCTCCACACAGAATGTTGTTGGTTTGAATGTGGGGAACCTCACAGGTGCT  
AAGCAGCCTCATCTCAGAGCTGGGTGCCAGGC

>Opossum\_FOXO3a

ATGGCAGAGGCGCCGTCCTCTCCGGCCCCGCTGTCGCCGCTGGAAGTGGAGCTGGACCA  
GAGTTCGAGCCCCAGAGCCGGCCCCGCTCCTGTACGTGGCCCCCTGCAGAGGCCCGAGCTG  
CAGGGCAGCCCCGCAAGCCCTCGGGGGAAGCGTCCGCCGACTCCATGATCCCCGAGGAG  
GAGGACGACGAGGAAGACGACGAAGGAGGCTGCGGAGTCCCTGGGGGCGGCGGAGGAGCT  
GGCAGGCCATGGCCATGGGCGGTGCGAGCGGCTTCTCGGCCCGGGACTGCGCCCCGAG  
GAGGCGGCCGGCTCTTGGCCCCTAGCGGGCAAGACTCGGGGGCCGGTGCGCCCCCCGGG  
GCGGGCGTGTGAGCGGGGGGAGCAGGGCGCCGCTGCAGCCTCCGAGGCGCCGCTGCCG  
CTGCCGCCGCCGCCACCGCCGCCGCTGCAGCAGCAGCAGCCGCCGAGCAACAGGGG  
GCGAGCGGGGCCGCGGGGAGCCGAGGAAATGCTCTTCCCGGAGGAACGCGTGGGGAAAC  
CTGTCTACGCCGACTGATCACTCAGGCCATCGAAAGCTTCCGGACAAGCGGCTCACC  
CTGTCCCAGATCTATGACTGGATGGTGCCTGCGTGCCTACTTCAAGGATAAGGGCGAC  
AGCAACAGCTCGGCCGGCTGGAAGAACTCTATCCGGCACAACTTGTCCCTACACAGTCGA  
TTCAAAGGGTACAAAACGAAGGGACCGGAAAAGTTCTTGGTGGATGATCAATCCGGAC  
GGGGGCAAGAGCGGAAAGGCCCCCGGCGCAGAGCCGCTCCATGGACAACAGCAACAAG  
TACACCAAGAGCAGGGGGCGGGCGGCTAAGAAAAGGCGTGCCTGCAGGCCCGCCAGGAG  
GCGCCCGAGGACAGCCGTCGTCGTCGTCGAGCTGGCCAAGTGGCCGGGAGCCCCACC  
TCCCGGAGCAGCGACGAGCTGGACACCTGGACGGACTTCCGCTCCCGGACCAACTCCAAC  
GCGAGCACGATCAGCGGGCGCCTGTCGCCATCCTGGCCACGTCGGAGCTGGATGACGTG  
CAGGACGACGACCCCCGCTCTCGCCGATGCTGTACAGCAGCTCGTCCAGCCTGTCCCCG  
TCGGTCAGCAAACCGTGCACGGTGGAGCTCCCGCGGCTCACCAGCATGGCGGGCACCATG  
AACCTCAACGACGGCCTGACGGACAACCTCATGGACGACCTGCTGGACAACATCACGCTG  
CCGCCCTCGAGCCGTCGCCGTCGGCGGGCCTCATGCAGCGGAGCTCCAGCTTCCCGTAC  
GCCCAAGGGCTCCGGCCTGGGCTCCCCGTCGGCGGCTTCGGCAACGCCGTGTTCCGGC

CCCTCGTCGCTGAACTCCCTGCGCCAGTCCCCATGCAGACCATCCAGGAGAACAAGGCG  
GCCACCTTCTTCCATGTCGCACTACGGCAACCAGACGCTGCAGGACCTGCTGACGTCCG  
GACTCCCTGAGCCACAGCGACGTCATGATGACCCAGTCCGACCCGCTCATGTCCCAGGCC  
AGCACGGCCGTGTCGGCCAGAACTCCCGCAGGAGCGTCATGCTCCGACGACCCGATG  
ATGTCCTTCGCGGCCAGTCCGGCCAGGGGGTCTGGTGGCTCAGAACCTCCTGCACCAG  
CAGACCCGGCCAGAGTCTCTCGGCGGCAACCGTGCCTTGTCTAGCGCCGGCGGGC  
CTGGGCTGAGCGACGCCGGCGGCTGGGCTCGGCCAAGCACCAGCAGCCGTCGCCCCC  
GGCCAGTCTATGCAAACCTTTCTGACTCACTCAGGGTCTCTTTGTATTCCACTAGC  
GTAAACCTCCCCGTCATGGGCCATGACAAATCCCCAGCGACTTGGACTTGGATATTTT  
AATGGGAGCTTGAATGTGACATGGAATCCATCATTGCGAGTGAATCATGGATGCCGAT  
GGGTTGGATTTAACTTTGATTCCCTCATCTCCGCTCAGAACGTTGCTCACTCTGAATGTG  
GGGAACTTCACTGGTGTAAGCAGGCCTCATCTCAGAGTTGGGTGCCGGC

>Orangutan\_FOXO3a

ATGGCAGAGGCACCGCCTCCCCGGCCCCGCTCTCTCCGCTCGAAGTGGAGCTGGACCCG  
GAGTTCGAGCCCCAGAGCCGTCCGCGATCCTGTACGTGGCCCCCTGCAAAGGCCGGAGCTC  
CAAGCGAGCCCTGCCAAGCCCTCGGGGGAGACGGCCGCCGACTCCATGATCCCCGAGGAG  
GAGGACGATGAAGACGACGAGGACGGCGGGGACGGGCCGGCTCGCCATGGCGATCGGC  
GGCGGCGGGAGCGGCACGCTGGGCTCCGGGCTGCTCCTTGAGGACTCGGCCGGGTGCTG  
GCACCCGGAGGGCAAGACCCGGGGTCTGGGCCAGCCACCGCGGCGGGCGCGCTGAGCGGG  
GGTACACAGGCGCTGCTGCAGCCTCAGCAACCACTGCCACCGCCGAGCCGGGGGGCGGCT  
GGGGGCTCCGGGAGCCAAGGAAATGTTGTCGCGGCGGAACGCCTGGGGAAACCTGTCC  
TACGCGGACCTGATCACCCGCGCCATCGAGAGCTCCCCGGACAAACGACTCACTCTGTCC  
CAGATCTACGAGTGGATGGTGCCTTGCCTACTTCAAGGATAAGGGGCGACAGCAAC  
AGCTCTGCCGGTGGAAAGAACTCCATCCGGCACAACCTGTCACTGCATAGTCGATTCATG  
CGGGTCCAGAATGAGGGAAGTGGCAAGAGCTTTGGTGGATCATCAACCCTGATGGGGGG  
AAGAGCGGAAAAGCCCCCGCGGCGGGCTGTCTCCATGGACAACAGCAACAAGTATACC  
AAGAGCCGTGGCCGCGCAGCCAAGAAGAAGGCAGCCCTGCAGACAGCCCCGAATCAGCT  
GACGACAGTCCCTCCAGCTCTCAAGTGGCCTGGCAGCCCCACGTCACGCAGCAGTGAT  
GAGCTGGATGCGTGGACGGACTTCCGTTACGCACCAATTCTAACGCCAGCACAGTCAGT  
GGCCGCTGTACCCATCATGGCAAGCACAGAGTTGGATGAAGTCCAGGACGACGATGCG  
CCTCTCTCGCCATGCTCTACAGCAGCTCAGCCAGCCTGTACCTTCAAGCAAGCCG  
TGCACGGTGGAACTGCCACGGCTGACTGATATGGCGGGCACCATGAATCTGAATGATGGG  
CTGACTGAAAACCTCATGGACGACCTGCTGGATAACATCACGCTCCCGCCATCCAGCCA  
TCGCCCCTGGGGGACTCATGCAGCGGAGCTTAGCTTCCATATAACCAAGGGCTCA  
GGCCTGGGCTCCCCAACCAGCTCCTTTAACAGCACGGTGTGGGACCTTCTCTGAAC  
TCCCTACGCCAGTCTCCATGCAGACCATTCAAGAGAACAAGCCAGCTACCTTCTCTTCC  
ATGTCACACTATGGTAACCAGACACTCCAGGACCTGCTCACTTCGGACTCACTTAGCCAC  
AGCGATGTCATGATGACACAGTCGGACCCCTTGATGTCTCAGGCCAGCACCGCTGTGTCT  
GCCAGAATCCCGCCGAACGTGATGCTTCGCAATGATCCGATGATGTCCTTTGCTGCC  
CAGCCTAACAGGGAAAGTTTGGTCAATCAGAACTTGCTCCACCACCAGCACCAAACCCAG  
GGCGCTCTTGGTGGCAGCCGTGCCTTGTGCAATTCTGTCAGCAACATGGGCTTGAGTGAG  
TCCAGCAGCCTTGGGTCAGCCAACACCAGCAGCAGTCTCCTGTCAGCCAGTCTATGCAA  
ACCCTCTCGGACTCTCTCAGGCTCCTCTTGTACTCAACTAGTGCAAACCTGCCCGTC  
ATGGGCCATGAGAAGTCCCCAGCGACTTGGACCTGGACATGTTCAATGGGAGCTTGGAA

TGTGACATGGAGTCCATTATCCGTAGTGAACCTCATGGATGCTGATGGGTTGGATTTAAC  
TTTGATTCCCTCATCTCCACACAGAATGTTGTTGGTTTGAACGTGGGGAACCTCACTGGT  
GCTAAGCAGGCCTCATCTCAGAGCTGGGTGCCAGGC

>Western\_painted\_turtle\_FOXO3a

ATGGCAGAGGCGTCTCCCCCTGCCCCCTCTCCCCTCTGGACGTGGAGCTGGACCCCGAG  
TTCGAGCCCCAGAGCCGGCCCCGCTCCTGCACTTGGCCCCTACAAAGGCCTGAGTTGCAG  
GCGAGCCCGCCAAGCCCTCGGGGAAGCGGCCGCGACGCCCTCCATGATCCCCGAG  
GAGGAGGACGACGAGGAGGAAGGGGGCAGCTCGCCCATGGCCATCGGCAGTGCCGTCCCC  
GGCGGAGGGGAAGCGCTGGCTCCGGAGGAGGCGGCCCGGCTGCTGACCCCGCTGTCCGGG  
GTCCGGGACGGAGGGCTCGGGCCAGGCCCCCGGGGCGAGCGGCCGCTGGGGGCAGCGGGCTG  
AGTGGGGGGCAGCCGGCGGCGGCCGCGGAAATGCTCGTCCCGGCGGAACGCGTGGGGC  
AACCTGTCTACGCCGACCTGATCACCCGCGCCATCGAGAGCGCCCCGACAAGCGGCTC  
ACCCTGTCCCAGATCTACGACTGGATGGTGCCTGCGTGCCTACTTCAAGGATAAGGGC  
GACAGCAACAGCTCGGCCGGCTGGAAGGTCTTTTTCTTGCCTTGCATCTTTTCTTGGTCT  
GTGAAGATGTTTACTCTAAGAATAGGCAGTGGCACCCCTCTGGCTTTTGTGTCTACACAG  
CTTCAATCGGTCTCTGATACAGAGTCTTGTAACTCAATCCGGCATAATTTGTCACTT  
CACAGTGCATTATCAGGGTACAGAATGAAGGAACTGGGAAAAGCTTTGGTGGATGATT  
AATCCAGATGGTGGAAAAGGTGGGAAGCCCCACGAGACGCGCTGTTTCAATGGACAAT  
AGCAACAATAACAAAAGAGCAGAGGCCGAGCAGCTAAGAAAAAGGCAGCCCTGCAAGCT  
GCACAAGAAGCTACCGAGGACAGCCCGTCTCAACTTTCCAAGTGCCAGGGAGCCCAACT  
TCTCGCAGCAGTGATGAGATGGATGCTTGGACAGATTTCCGCTCTCGTACAAATTCAAAT  
GCCAGTACAATAAGTGGCCGTTTGTACCGATATTGGCGAGTACCGAACTAGATGACGTT  
CAGGATGATGATGCTCCACTTTCTCCAATGCTGTACAATAGTCCATCAAGCATGTCCCCA  
TCGGTAAATAAACCATGTACTGTTGAGTTGCCTAGGTTGACTGATATGGCAGGCACAATG  
AACTTGAATGATGGACTGACAGATAACCTCATCATGGATGATCTTTTGGACAATATAACG  
CTCCCCTCTCCCAGCAGTACCATCAGGGGGGCTCATGCAAAGAAGCTCCAGTTTTCCA  
TATGGTTCAAAAGTTCCGGACTTGGTTCTCCATCAAGTAATTTCAACAGTGTGTGTTT  
GGACCATCATCTCTGAATTCCTTCGTGAGTCTCCCATGCAGACCATTCAAGAGAACAAG  
CAAGCTACCTTTTCTTCCATTTCTCATTATAACAACCAGACGCTGCAGGATCTGCTGGCA  
TCTGAGTCACTTAGTCACAGTATGTCATGATGACGCAGTCTGATCCACTCATGTCTCAA  
GCCAGCACTGCTGTGTCTGCCAGAATTCACGCAGGAGTATCATGCTTCGTAGTGATCCA  
ATGATGTCATTTGCTGCTCAGTCCAACCAGGGAAGTTTGGTCAATCAGAACCTGCTCCAC  
CACCAGCATCAATCTCAGAATCTTCTCTTGGTGGCAGTCGTGCCTTGTCAAATTCATC  
AGTAACATGGGCTTAAATGATACGAACAACCTTAGGGTCAGCCAAACACCAGCAGCAGTCA  
CCCATCAATCAGTCTATGCAAACCCTTTCTGACTCACTCTCAGGCTCTTCTTTGTATTCC  
ACTAGTGTGAACCTTCCAGTCATGGGGCATGATAAATTTCCAAGCGATTTGGACCTGGAT  
ATTTCAATGGAAGCTTGAATGTGACATGGAGTCCATTATCCGCAGTGAACCTCATGGAT  
GCAGATGGGTTGGATTTAACTTCGATTCCCTCATCTCAGCTCAGAACGTTGTCACTGTG  
AATGTGGGGAGCTTCACTGGTGTAAAGCAGGCTTCGTACAGAGTTGGGTGCCAGGC

>Panda\_FOXO3a

ATGGCAGCAGTGGGAGCAAGGAGTGACAAGAGCCAGTCCGCGCTCGGACCCACGTTTCGTC  
CTCCTGGCCCGCCGGCGAAGAGGGGAGAAGGTGGCTGCCCGCGCCGTCCCCGACTCGGG  
CCCCTCAGCGGGGAGATGGGAGTACAAGGGGGCGCGGAGGCGGCAGGCTCCGGGCAGCCG  
AGGAAATGCTCTTCGCGGCGGAACGCCTGGGGGAACCTGTCTACGCCGACCTGATCACT

CGGCCATCGAGAGCTCGCCGGACAAACGGCTCACTCTGTCCCAGATCTACGAGTGGATG  
GTGCGCTGCGTGCCCTACTTCAAGGATAAGGGCGACAGCAACAGCTCTGCGGGGTGGAAG  
AACTCTATCCGGCACAACCTGTCACTGCACAGCCGGTTCATGCGGGTCCAGAATGAGGGG  
ACTGGCAAGAGCTCTTGGTGGATCATCAACCCTGATGGGGGAAAGAGTGGGAAGGCACCC  
CGGCGGCGGGCTGTCTCCATGGACAACAGCAACAAGTATACCAAGAGCCGTGGCCGTGCA  
GCCAAAAGAAGGCGAGCCCTGCAGACAGCCCTGAGTCAGCAGATGATAGTCCCTCCCAG  
CTCTCCAAGTGGCCTGGCAGCCCCACGTACGCAGCAGCGATGAGCTGGATGCATGGACA  
GACTTCCGCTCGCGCACCAATTCCAATGCCAGCACCGTCAGCGGCCGCCTGTCAACCATC  
TTGGCAAGCACAGAGTTGGATGACGTCCAGGATGATGACGCGCCTCTCTCCCCATGCTC  
TACAGCAGCTCAGCTAGCCTCTCACCCCTGTAAAGTAAGCCGTGCACCGTGGAGCTACCA  
CGGCTGACCGACATGGCAGGCACCATGAATCTGAATGATGGGCTGTCTGACAACCTCATG  
GATGACCTGCTGGATAACATCACGCTCCCATCGTCCCAGCCATCGCCCACTGGAGGGCTC  
ATGCAGCGGAGCTCTAGCTTCCCATATACCACCAAGGGCTCCGGCCTGGGTTCTCCAAC  
GGCTCCTTTAACAGCACAGTGTGGACCTCGTCTCTGAATTCCTGCGCCAGTCTCCC  
ATGCAGACCATCCAAGAGAATAAGCCAGCTACCTTCTTCCATGTCCCACTATGGCAAC  
CAGACTCCAGGACCTGCTCACTTCCAGACTCACTCAGCCACAGTGATGTCATGATGACC  
CAGTCAGACCCCTTGATGTCTCAGGCCAGCACCGCTGTGTCTGCCAGAACTCCCGCCGG  
AACGTGATGCTTCGAAATGACCAATGATGTCTTTGCCGCCAGCCTAACCAGGGGAGT  
TTGGTCAATCAGAACTTGCTCCACCACCAGCACCAACCAGGGCGCTCTCGGTGGCAGC  
CGTGCCTTGTGCAATTCTGTGAGCAACATGGGCTTGAGCGACTCCAGCAGCCTTGGGTCA  
GTTAAACACCAGCAACAGTCTCCTGTGAGCCAGTCTATGCAAACCTCTCGGACTCTCTC  
TCAGGCTCCTCCTGTACTCAACTAGTGCAAACCTTCCCGTCATGGGCCATGAGAAGTTC  
CCCAGCGACTTGGACCTGGACATGTTCAATGGGAGCTTGAATGTGACATGGAGTCCATT  
ATCCGTAGCGAACTCATGGATGCTGATGGGTTGGATTTAATTTGATTCCCTCATCTCC  
ACACAGAATGTTGTTGGTTTGAACGTGGGGAACCTCACTGGTGCTAAGCAGGCCTCATCT  
CAGAGCTGGGTCCCAGGC

>Rock\_pigeon\_FOXO3a

ATGTGGTGCACCTGGGCTCGCTCCCCCTGCGGCTTCTCCCGCGGGCGCTTGCTCACAGG  
TACCGCACTGATGCTGCAGCAGTGATGCTGCGGCTGTGGCGGACTAAGGATGCAGCTGAG  
ATGAAGTTTGTGGACAAAGACGACTCTGTACTGCAGTGAAGCACTTGCAGCTGGTGTCT  
GAGTTAATGGACAGGCTCCACAAGAATTCGATCCGGCACAACCTTGTCACTCCACAGCCGC  
TTCGTCAGAGTGCAGAATGAAGGCACTGGGAAAAGCTCTTGGTGGATGATTAATCCAGAT  
GGTGGAAAAGTGGCAAGGCGCCCCGGAGACGTGCTGTGTCATGGACAACAGCAACAAG  
TACACGAAGAGCAGAGGGCGGGCGGCTAAGAAGAAGGAGCCCTGCAGACCGCCAGGAG  
ACGAGCGAGGACAGCCCTTCTCAGCTCTCAAATGGCCGGGGAGTCCACCTCCCGCAGC  
AGTGATGAGCTGGATGCATGGACAGATTTTCGCTCCCGTACAAATTCAAACGCCAGTACG  
ATCAGTGGCCGCTTGTCCCCGATTTTGGCAAGCACCGAGCTAGATGATGTTCAAGATGAT  
GACGCTCCACTTCTCCCATGCTCTACAGTAGCCCATCGAGCTTGTCCCCATCAGTAAAC  
AAACCATGTACTGTGGAGTTGCCTAGGTTGACTGATATGGCTGGGACAATGAATTTGAAC  
GATGGACTGACAGATAACCTCATGGATGATCTTGGACAATATAAACTCCCTCCCTCC  
CAGCAGTCGCCTACAGGAGGGATAATGCAGAGAAGCTCCAGTTTTCCATATGGTTCCAAA  
GGTTCAGGGCTGGGTTCCCATCAAGTAGTTTCAACAATGCTGTGTTCCGGCCATCGTCG  
CTGAATTCCTCCGCGCAGTACCCATGCAGACCATTACAGGAGAACAAGCAGGCCACCTTC  
TCTCCATGTCTCATTACAACAACCAGACGCTGCAGGATCTCCTTGCTCTGATGCACTT



AGTCACAGCGATGTCATGATGACACAGTCTGACCCACTCATGTCAACAAGCCAGCACAGCT  
GTGTCCGCCAGAATTCCCGCAGGAATATAATGCTCCGCAACGACCCCATGATGTCATTT  
GCCGCGCAGTCCAGCCAGGGCGGTCTGGTCAATCAGAGCCTGCCTCATCACCAGCACCAG  
TCCCACAACCTCTCTTAGTGGCAGCCGTGCCTTGCCAATTCCATCAGTAACATAGGC  
TTGAGTGACTCGAACAGCTTGGGATCCTCCAAACATCAGCAGTCATCTGTCAATCAGTCT  
ATGCAAACACTTTCTGACCCTCTCTCAGGCTCCTCTTTGACTCCTCTAGTGTGAACCTC  
CCGGTCATGGGACACGAGAAATCCCAAGTACTTGGACCTGGATATTTCAATGGGAGC  
TTGGAGTGTGACATGGAGTCCATTATCCGCAGTGAACCTCATGGATGCAGATGGGCTGGAT  
TTAACTTTGATTCCCTCATCTCAGCTCAGAACGTTGTCGGTCTGAATGTGGGGAACCTC  
ACTGGTGCTAAACAGGCTTCATCACAGAGTTGGGTACCAGGC

>Pig\_FOXO3a

ATGGCAGAGGCGCCGGCCTCCCCGGTCCCGCTCTCTCCGCTCGAAGTGGAGCTGGACCCG  
GAGTTGAGCCCCAGAGCCGTCCGCGCTCCTGTACGTGGCCCCTGCAGAGGCCGGAGCTC  
CAGGGGAGCCCGCCAAGCCCTCGGGGAGGCGGCGCTGACTCCATGATCCCCGAGGAG  
GAGGACGATGAAGACGACGAGGACGGCGGGTAGGGCCGGCTCGGCCATGGCGATCGGC  
GGCGGCGGGGGCGGCCCGCTGGGCTCTGGGCTGCTCCTGGAGGACTCGGCCAGGCTGCTG  
GCTCCCGAGGGCAGGAACCCGGTCCGGCCAGCCTCCGCGGCGGGCGCGCTGAGCGGA  
GGGACGCAGACGCCGCTGCAGCCTCAGCAGCCACTGCCACCGCCGAGCCGGGGGCGGCT  
GGGGGCTCCGGGCAGCCGAGGAAATGCTCCTCCCGCGGAACGCCTGGGGGAACCTGTCC  
TACGCCGATCTGATCACTCGCGCCATCGAGAGTTCCCGGACAAACGGCTCACTCTGTCC  
CAGATCTATGAGTGGATGGTGCCTGCGTGCCTACTTCAAGGATAAGGGCGACAGCAAC  
AGTTCTGCCGGCTGGAAGAACTCTATCCGGCACAACCTGTCACTGCACAGCCGGTTCATG  
CGAGTCCAGAACGAGGGGACCGGCAAGAGCTCTTGGTGGATCATCAACCCTGATGGGGGA  
AAGAGCGGGAAGGCGCCCCGGCGGGCTGTCTCCATGGACAACAGCAACAAGTACACC  
AAGAGCCGCGCCGGGCGAGCCAAGAAGAAGGCCGCGCCTGCAGACAGCCCCTGAGTCGGCA  
GACGACAGTCCCTCCAGCTCTCAAGTGGCCCGCAGCCCCAGTCCCGCAGCAGTGAT  
GAGCTGGACGCTGACTGACTTCCGCTCGCGCACCAATTCCAACGCCAGCACGGTTCAGC  
GGCCGCTGTCCCCATCCTGGCCAGCACAGAGTTGGATGACGTCCAGGATGACGACGCG  
CCGCTCTCCCCATGCTCTACAGCAGCTCGGCCAGCCTGTCCCCCTCGGTACAGTAAGCCC  
TGCACCGTGGAGCTGCCCGGCTGACCGACATGGCCGGAACCATGAATCTCAATGACGGG  
CTGGCTGACAACCTCATGGACGACCTGCTGGACAACATCGCGCTGCCCTGTCCCAGCCA  
TCGCCCCCGGGGGGCTCATGCAGCGCAGCTCTAGCTTCCCCTACACCACCAAGGGTCC  
GGCCTGGGCTCGCCACCAGCTCCTCAGCAGCACAGTGTTTGGACCCTCGTCTCTGAAC  
TCGCTGCGCCAGGCGCCATGCAGACCATCCAAGAGAACAAGCCAGCCACCTTCTCTTCC  
ATGTGCGACTACGGCAACCAGACACTCCAGGACCTGCTCACGTGGACTCACTCAGCCAC  
AGCGATGTCATGATGACCCAGTCGGACCCCTTGATGTCTCAGGCCAGCACCGCTGTGTCC  
GCCAGAACTCCCGCCGGAACGTGATGCTTCGAGTGACCCAATGATGTCTTTGCCGCC  
CAGCCTAACCAGGGGAGTTTGGTCAATCAGAACTTGCTCCACCACCAGCACCAAACCCAG  
GGCGCTCTCGGTGGCAGCCGTGCCTTGTGAATCCGTCAGCAGCATGGGCTTGAGCGAC  
TCAAGCAGCCTCGGGTCAGCCAAACACCAGCAGCAGTCTCCTGTCAGCCAGTCTATGCAA  
ACCCTCTCGGACTCCCTCTCAGGCTCCTCTTGTACTCAACGAGTGCGAACCTTCCCGTC  
ATGGGCCACGAGAAGTTCCCAGCGACTTGGACCTGGACATGTTCAACGGGAGCTTGAA  
TGTGACATGGAGTCCATTATCCGTAGCGAACTCATGGATGCTGACGGGTTGGATTTAAC  
TTTGATTCCCTCATCTCCACAGAACGTTGTTGGTTGAACGTGGGGAGCTTCACTGGT

GCTAAGCAGGCTCATCTCAGAGCTGGGTGCCAGGC

>Platypus\_FOXO3a

AACGCCTGGGGGAACCTGTCTACGCCGACCTCATCACCCGCGCTATAGAGAGCTCCCCG  
GACAAGCGCCTCACCTCTCCAGATCTACGACTGGATGGTGCAGCGTGCCTTACTTC  
AAGGATAAAGGCGACAGCAACAGCTCCGCAGGCTGGAAGAACTCAATTCGGCACAACCTG  
TCCCTGCACAATCGGTTTCATCAGGGTCCAGAACGAGGGGACCGGGAAAAGCTCCTGGTGG  
ATGATCGACCCGACGGTGGCAAGGGCGGGAAGGCCCCAGGCGCCGGGCTGTCTCGATG  
GACAACAGCAACAAGTACAGCAAGAGCCGCGGGCGAGCGGCCAAGAAGAAGGCCACCCTG  
CAGGCCGCCAGGAGGGGGCGGAAGACAGCCCGGGGTCGCAGCTGGCCAAGTGGCCAGGC  
AGCCCCACCTCCCGCAGCAGCGACGAGCTGGATGCGTGGACAGACTTCCGCTCGCGGACC  
AACTCCAACGCCAGCACGGTGAAGCGGGCGCTGTGCCCATCCTGGCGAGCGCGGAGCTG  
GACGAGGCCAGGATGACGCCGCCCTCCCTCACCCATGCTGTACGGCAGCCCCCAACC  
ATGTCCCCGGCCGGGGGTGCCCGTGCATGGTGGAGCTGCCCGGCTGACTGACATGGCG  
GGGACCATGAACCTGAATGACGGGTGGCGGCGGACGACCTCATGGACGACCTCCTGGAC  
GACATCTCCCTGCCCTCACCCAGCCATCCCCCTCGGCGGGGCTCCTGCAGCGGAGCGCC  
ACCTTCCCCTATGGCCCAAGGGCTCGGGGCTTGGCTCCCCGCGGGTGGCTTCGGCCCT  
GCGGCCTTCGGTCCCTCCCCGCTCAACTCCCTCCGCCAGTCCCCATGCAGACCATCCAG  
GAGAACAAGCCGGCCACCTTCTCGTCCCTGTCTCATTACGGCACCCAGACGCTGCAGGAC  
CTGCTGGCGTCCGACTCGCTGAGCCACAGCGACGTCATGATGACACAGTCGGACCCGTTG  
ATGTCACAAGCCAGCACGGCCGTGTCCGCCAGAACCCCCGCGGAGCGTCATGCTCCGG  
AGGACCCGATGATGTCTTCGCCGCCCGCCGCGCCAGGGCGGCTGGTCCACCAGAAC  
CTGCTCCACCACCAGCACCCGCGCCAGGGTCCCTGGGCGGTGGCCGGCACTGGCCAGT  
GGCGCCGGCGGCTGGGGTGGGCAAGCACCAGCAGCAGCAGCAGCAGCAGCAGCAGCCGCCG  
CAACAGCAGCAGCAGCCCGCAGCCGCCGAGTCCCCGTCAGCCAATCTATGCAAACC  
CTTCCGACTCCCTCTCAGGCTCCTTTGTATTCTTCTAGCGTGTCCCTCCCCGTCCTG  
GGCCACGAGAAATCCCCAGCGATTTGGACCTGGATATTTCAATGGGAGCTTGGAGTGT  
GACATGGAGTCCATCATCCGAGCGAACTCATGGATGCAGACGGCTTGGATTTAACTTT  
GACTCCCTCATCTCCGCTCAGAACGTTGTGAGTCTGAATGTGGGAAACTTCACTGGTGT  
GCGCAGGCTCCTCCAGAGCTGGGTGCCGGC

>Rabbit\_FOXO3a

ATGGCAGAGGCGCCGGCCTCCCCGGCCCCGCTCTCTCCGCTCGAAGTGGAGCTGGACCCG  
GAGTTCGAGCCCCAGAGCCGACCGGTTCTGCACTTGGCCCTGCAGAGGCCGGAGCTC  
CAGGCGAGCCCGGTCAAGCCCTCGGGGGAGACGGCCGCGACTCCATGATCCCCGAGGAG  
GACGACGATGAAGACGACGAGGACGGCGGCGGGCTGGCTCGGCCATGGCGATCGGC  
GGCGGCGGCGGCGGGAGCGGCGGCTGGGCTCCGGGCTGCTCCTGGAGGATTGGGCC  
CGCCTGCTGGGTGCCGGAGGGCAGGACCTCGGGCCCGGGCCAGCGCCCGGGCGGGCGG  
CTGAGCGGGGGACGCAGACTCCGCTGACGCTCAGCAGCCGCTGCCACCGCTGCAGCCG  
GGGGCGGCTGGGGGCTCAGGGCAGCCGAGGAAATGCTCCTCGCGCCGGAACGCTGGGGG  
AACCTGTCTACGCCGACCTGATCACTCATGCCATCCAGAGCTCCCCGGACAAGCGGCTC  
ACTCTGTCCAGATCTATGAGTGGATGGTGCCTGTGTGCCCTACTTCAAGGATAAGGGC  
GACAGCAACAGCTCCGCCGTTGGAAGAACTCCATCCGACACAACCTGTCGCTGCACAGT  
CGGTTTCATGCGGGTGCAGAACGAGGGGACGGGCAAGAGCTCATGGTGGATCATCAACCC  
GATGGGGCAAGAGCGGGAAGGCGCCCCGGCGGGCCGTTTCCATGGACAACAGCAAC  
AAGTACACCAAGAGCCGTGGCCGCGCCGCAAGAAGAAGGCGGCCCTGCAGACGGCACCC

GAGGCGGCCGACGACAGCCCCCTCCAACTGGCCAAGTGGCCCGCAGCCCCACGTGCGCG  
AGCAGCGACGAGCTGGACGCCTGGACGGA CTTCGCTCGCGCACCAACTCCAACGCCAGC  
ACGGTTAGCGGCCGCTGTGCGCCATCCTGGCGAGCACAGAGCTTAATGAGGTCCAGGAC  
GACGATGCTCCGCTCTCCCGATGCTGTACAGCAGCTCCGCCAGCCTGTGCGCTTCTGCG  
AGCAAGCCGTGCGCCGTGGAGCTGCCGCGGCTCACCGACATGGCGGGCACCATGAACCTG  
AACGACGGGCTGGCTGACAACCTCATGGACGACCTGCTGGACAACATCCCCCTGCCGTCC  
TCCCAGCCGTACCCCCCGGACGCTCATGCAGCGGAGCTCCAGCTTCCCCTACGCCGCC  
AAGGGCTCCGGCCTGGGCTCTCCGACCGGCTCCTTAACAGCACGGTGTTCCGGGCCGTG  
TCTCTGAACTCCCTGCGCCAGTCCCCATGCAGACCATCCAGGAGAACAAGCCAGCCACT  
TTCTCTCCATGTGCGACTACGGCAGCCAGACACTCCAAGACCTGCTCACTTCAGACTCG  
CTCAGCCACAGCGACGTATGATGACCCAGTCGGACCCCTTGATGTCTCAGGCCAGCACC  
GCTGTGTCTGCCAGA ACTCCCGCCGACGTGATGCTGCGCAATGACCCGATGATGTCC  
TTTGCTGCCAGCCTAACAGGGGAGTTTGGTCAATCAGA ACTTGCTCCACCACCAGCAC  
CAGACCCAGGGCGCTCTCGGTGGCAGCCGTGCCTTGTGAATTCCGTGAGCAGCATGGGC  
TTGAGTGACTCCAGCAGCCTCGGGTCAGCCAAACACCAGCAGCCGTCTCCCGTCAGCCAG  
TCTATGCAAACCTCTCGGACTCGCTCTCAGGCTCCTCCTTGTACTCAGCTAGTGCAAAC  
CTTCCCGTATGGGCCACGAGAAGTTCCCAGCGACTTGACCTGGACATGTTCAATGGG  
AGCTTGAATGTGACATGGAGTCCATTATCCGTAGTGA ACTCATGGACGCGGACGGGTTG  
GATTTAACTTTGACTCCCTCATCTCCACACAGAACGTTGTTGGTTTGAACGTGGGGAGC  
TTCAGTGGTCTAAGCAGGCCTCATCTCAGAGCTGGGTGCCGGGC

>Tetraodon\_FOXO3a

ATGGCCGAGGCGCCGCGGACGAGCCGCCCTCGAACGTCGAGATCGACCCGGATTCGAG  
CCTCAGAAGCGGCCGCGCTCCTGCACTTGGCCCTTCCCCTCCGGAGTCCGGCGGCAAG  
CCCGGGACCCATGACACTGACGTAATCCCCGAAGAGGAGGACGATGAAGGCGGCAGCTCG  
GGCAACGCCGAGAAAGCCTGCGCCCGCTCGGCGTCCAGCCCCGGGAGTCGGGCGGCGGC  
GGCGGCTCCGGCTCCAGCCCCCTGGAGCTCCGGCGCGGGCCCTGCAAGGAGGAGGCCGCC  
GATGGATCGCCCTCCTCGGCGCAGACCCCGCGGCGCCGCGCTGAGCGCCTCTGCGTCC  
CAGCAGCTGCGAAGTCTCCGCCGCTCGGAACGCGTGGGGCAACTACTCCTATGCAGAC  
CTCATCACGCAAGCCATCGAGAGCTCCCCGAGAAGAGGCTGACCTTGTCCAGATCTAC  
GACTGGATGGTCCGGTCCGTGCCATATTTCAAGGACAAAGGGCAGCAACAGCTCTGCT  
GGCTGGAAGAATTCCATCCGGCACAATCTGTCCCTCCATAGCCGATTCGTGAAGGTTGAG  
AATGAGGGGACGGGAAAAAGCTCCTGGTGGATGGTCAACCCAGAAGGCGGGAAAGGAGGC  
AAAGCTCCGAGACGAGGGCCGTTTCCATGGACAACAGCAAGTACATCAAAGGAGCCCCG  
GGGCGCGCCACCAAGAAGAAGGCCCTGCTGCAGGCCGCCAGGACGGCAGCTCGGAAAGC  
TCCTCCAGCCTGTCCAAGTGACGGGAAGTCCCACCTCCCGCAGCAGCGACGAGCTGGAC  
GCCTGGACGGACTTCCGCTCGCGGACCAACTCCAACGCCAGCACCTCAGCGGCCGCTG  
TCCCCATCCTGGCCAACCTGGAGCTGGACGAGGTGCCCGACGACTCGCCCCTCTCC  
CCCATGTTGTA CTCCAGTCCAGCAGCATGTCCCCGTCCACCGGGCCACGGTGCTGTG  
GATTTGGCGGGCACCATGAACCTCAACGACGGGCTCTCGGACAACCTGATGGACGACCTT  
TTGGACAACATCAGCCTGACCGCCACCCAGCAGCTTCTCCTGGAGAGGAAGACAGCGGC  
GGTCAGGCCACCTCGGTGTTTACCTTCAGCTGCTCGGGAAGCAGTCTCGGCAGCCCTCTC  
TTCAGCCCTCCGTCCATCACCAGCCTGCGGCAGTCCCCATGCAGACCATCCAGGAGAAC  
AAGCAGACCACCTTCTCTGCTCTCCACTTCGGCGACCAACCAGAGTCTCCAGGACCTG  
CTCAGTCTGGACTCCCACGGCCACAGCAATGTCATGCTCACCCAGTCGGACCCGCTGATG

TCCCAGGCCAGCACCGCCGTCGCCCTGCAGAACTCCCGCCGGAACGCCATGCTTCTCCAT  
AAAGACCCCCCTCGGTGAACCACACCGGCGCAGGTCAGGCCAAAGCTTTCAGTGCCT  
GTTTGCAAGCTGGCTTGTGACCTCGGAGGACAACGGCGGGCGCAACAACGCCAAACAG  
CCGACCTGAAGTCTCCAGCAAGAATGCCTCTATGCAGCTCGGCTCTGGTTTCCCCAGC  
CAGGATCGCTTCCCCGCCGACCTGGACCTCGACGTGTTCAACAGCAGCCTGGAGTGCGAC  
ATGGACGCCATCATCCGTAACGAGCTGATGGACGCCGACTGCCTGGACCTCAGTTTTGAC  
TCCCGCTACTCCACCCAGAACGGCAACAAGAATTCAGGAAGCTACTCCGGCTCCAAA  
CCGGCGGCCCTCGCAGCTGGGTGCCGAGC

>Tilapia\_FOXO3a

ATGGCTGAGGCGTCGCGCAGCGGCAACGAGCCGCTCTAAACGTTGAGATAGATCCGGAT  
TTCGAGCCCCAGAAGCGGCCACGGTCTGCACTTGGCCCTGCCCGTCTGAATCTGGT  
GCGGGCAAGCCCGGGGCAAATGACACTGACGTAATCCCCGAAGAGGAGGATGATGAGGGT  
GGGAGCACGGGGAGCGGCGCTGCTCAGAAAGCCAGCGGCGGCGCTATTAACCCGAGAG  
CCGAGCAGCAACAGCTCAATCTCCAGCCGGTGGAGGTCCAGCGGGGCCCTCCAAAGAG  
GAGACCGCCGACGGCTCGCCGTCCTCGGCGCAAACCCCGCAGCAGCTCTGGGAGTTCT  
GCCACCCAGCAGCTGAGGAAGTCTCCGCCCGCAGGAATGCCTGGGGCAACTACTCCTAT  
GCAGACCTCATTACCCAAGCCATCGAGAGCTCCCCTGAGAAAAGTTGACCTTGCCCAA  
ATCTATGAGTGATGGTGAGATCCGTGCCATATTTCAAGGACAAAGGCGATAGCAACAGC  
TCTGCTGGCTGGAAGAATTCCATCCGACACAATCTTCCCTCCATAGCCGTTTTGTGAAA  
GTCCAGAATGAAGGAAGTGGGAAAAGTCTCTGGTGGATGGTCAACCCAGAAGGTGGAAAA  
GGAGGTAAAGTCCCAGACGTAGGGCTGTGTCGATGGACAACAGCAAGTACATCAAAGGA  
GCCCCGAGGACGTGCCACAAAGAAAAAGCCACATTGCAGGCTGCTCAAGATGGGAGCTCT  
GAGAGCTCTCAAGCCTCTCCAAATGGACAGGAAGTCCCACCTCCCGCAGCAGTGACGAG  
CTCGATGCCTGGACAGACTTCCGCTCTCGGACAAATCCAACGCCAGCACGCTCAGCGGT  
CGTCTGTCCCAATCTGGCTAACCTGGAGCTGGATGAGGTACCTGATGACGACTCGCCC  
CTGTGCGCAATGCTGTACTCCAGCCCCAGCAGCATGTCTCCATCCACTGGACCAACAGGA  
CTGTCTGATCTAGCAGGCACAATGAACCTCAATGACGGGCTCTCTGACAACTTGATGGAT  
GATCTTTTAGACAATATCAGCCTCACAGCATCCAGCAGCCGCTCCTGGAGAGGAAGAT  
GGGGCCAACAGTCAGGGGAGTTCAGTATTTACCTTCAGCTGCTCAGGAAGCAGTTTAGGT  
AGTCCCTTAGCAGCTATGGGACAAACCCACTCTTCAGCCCTCCGTCCATCACGAGCCTG  
CGACAGTCAACCATGCAGACCATCCAAGAGAACAAGCAGACCACTTTTTCTGCATGTCT  
CACTACAGTGAGCACCAGGCCCTGGATCTGCTTGGGATGGACTCCCACAGCCACAGCAAT  
GTCATGATGACCCAGTCCGACCCCTCTGATGTGCGCAGGCCAGCACCGCCATCGCTCTGCAG  
AACTCCCGCCGAAATGCCATGCTGCTCCGCAAAGACCACATTCTGGTTAACCACACCAGT  
GCAGGCCAGGCCAAAGCTCTTCAGTGCCTGGTTGGCAAGCGGGCTTGTCAACCTCTGAC  
AGTGACGACGGCCACCCTGAAACCAAGCAGCTACACCTGAAATCTCCTAGTAAGAATGCC  
TCTATGCAGCTCAGTTCAGTTAACCAGTCAGGACCGTTTCTCCGCTGATCTGGACCTC  
GAGGTGTTGAGCAGCAATCTGGACTGCGACATGGACTCCATCATCCGCAATGAACTGATG  
GATGCTGATTGCCTGGACCTCAGCTTTGACTCTCGTCTCGCCTCCACACAGAACGGCAAC  
AAGAATTCAGGAAGCTTCTCCAGCTCGAAACAGAGCCCTCAGAGCTGGGTGCCGAGC

>Turkey\_FOXO3a

ATGTCCAGGAGGGCCAGTGTGTTTTCATGTCATTTTCTGTGATGTTGGTGTGCGA  
TTGAGATTTGGAGTAGCAAAAGCAGTGCTGGTCTTGACATGTTGTTTTCTTCTTCTG  
CAGAATTCATCCGGCACAACCTGTGCTCCACAGCCGATTCATCAGGGTGCAAAATGAA

GGCACTGGGAAGAGCTCCTGGTGGATGATCAATCCAGATGGTGGAAAAGTTGGCAAGGCG  
CCCCGGAGACGCGCCGTGTCTATGGACAACAGCAACAAATACACAAAGAGTAGAGGGCGG  
GCAGCGAAGAAAAAGGCAGCTCTGCAGACTGCCAGGAGGCGAGTGAGGACAGTCCCTCA  
CAGCTCTCCAAGTGGCCGGGAGCCCGACTTCCCGCAGCAGTGACGAGCTGGATGCCTGG  
ACAGATTTTCGCTCCCGGACCAATTGGAACGCCAGTACAATAAGTGGGCGCTTGTGCGCG  
ATTTTGGCGAGCACCGAGCTGGATGATGTTCAAGATGATGACGCTCCACTTTCTCCCATG  
CTGTACAGTAGCCCTTCGAGCTTGTCCCCCTCGGTAAACAAACCATGCACTGTGGAGTTG  
CCTAGGTTGACTGATATGGCTGGGACAATGAATTTGAACGATGGACTGACGGATAACCTC  
ATGGATGACCTCTTGACAATAAACAACCTCCCTTCTCCAGCAGTCGCCACAGGAGGA  
ATAATGCAGAGAAGCTCCAGTTTTCCGTATGGTTCCAAAGGTTCAAGGCTGGGCTCCCC  
TCGAGTAGTTTTCAACAACGCCGTGTTTGGGCCATCGTCCCTGAATTCCTCCGCCAGTCG  
CCCATGCAGACTATTCAGGAGAACAAGCAGGCTACCTTCTCTTCCATTTCTCATTACAAC  
AACCAGACGCTGCAGGATCTGCTCGCCTCAGATGCACTTAGTACAGCGATGTCATGATG  
ACACAGTCTGACCCGCTCATGTCCAGGCCAGCACAGCTGTGTCCGCCAGAACTCCCGC  
AGGAATATAATGCTCCGCAATGACCCCATGATGTGCTTTGCTGCGCAGTCCAGTCAGGGC  
GGTCTGGTCAATCAGAGCCTGCCCATCACCAGCACCAGTCTCACAGCTCTCCTCTTAGT  
GGCAGCCGTGCCTTGTCCAATTCATCAGTAACATAGGCTTGAATGACTCCAACAGCTTG  
GGATCCAAACATCAGCAATCACCTGTCAATCAGTCTATGCAAACACTTTCTGACCCTCTC  
TCAGGCTCCTCTTTGTATTCTCTAGCATGAACCTCCGGTCATGGGACACGAGAAATTC  
CCAAGTACTTAGACCTGGATATTTTCAATGGGAGCTTGGAGTGTGACATGGAGTCCATC  
ATCCGCAGTGAACATCAGGATGCAGATGGGCTGGATTTTAACTTTGATTCCCTCATCTCA  
GCACAGAACGTTGTCAGTCTGAATGTGGGGAACCTCACTGGTGCTAAACAGGCTTCATCA  
CAGAGTTGGGTACCAGGC

>Worm\_FOXO3a

ATGATGGAGATGCTGGTAGATCAGGGAACATGATGCATCGTCATCCGCCTCCACGTCCACC  
TCATCTGTTTCGAGATTCGGAGCGGACACGTTTCAATGAATACCCGGATGATGTGATGATG  
AATGATGATATGGAACCGATTCTCGTGATCGGTGCAATACGTGGCCAATGCGTAGGCCG  
CAACTCGAACCACTCAACTCGAGTCCCATTATTCATGAACAAATTCCTGAAGAAGAT  
GCTGACCTATACGGGAGCAATGAGCAATGTGGACAGCTCGGCGGAGCATTTCAAACGGG  
TCGACAGCAATGCTTCATACTCCAGATGGAAGCAATTCTCATCAGACATCGTTTCTTCG  
GATTTCAGAATGTCGAATCGCCAGACGATACCGTATCGGGAAAAAAGACAACGACCAGA  
CGGAACGCTTGGGAAATATGTCATATGCTGAACTTATCACTACAGCCATTATGGCTAGT  
CCAGAGAAACGGTTAACTCTTGCAACAAGTTTACGAATGGATGGTCCAGAATGTTCCATAC  
TTCAGGGATAAGGGAGATTGGAACAGTTCAGCTGGATGGAAGAACTCGATCCGTCACAAT  
CTGTCTCTTCACTCTCGTTTCATGCGAATTCAGAATGAAGGAGCCGAAAGAGCTCGTGG  
TGGGTTATTAATCCAGATGCAAAGCCAGGAAGGAATCCACGGCGTACACGTGAACGATCC  
AATACTATTGAGACGACTACAAAGGCTCAACTCGAAAAATCTCGCCGCGGAGCCAAGAAG  
AGGATAAAGGAGAGAGCATTGATGGGCTCCCTTCACTCGACACTTAATGGAAATTCGATT  
GCCGGATCGATTCAAACGATTTCTCACGATTTGTATGATGATGATTCAATGCAAGGAGCA  
TTTGATAACGTTCCATCATCTTCCGTCCCCGAACCTCAATCGAACCTCTCGATTCTGGA  
TCGTCTCTCGTGTTCCTCAGCTATTGGAAGTGATATCTATGATGATCTAGAATCCCA  
TCATGGGTTGGCGAATCGGTTCCAGCAATTCCAAGTGATATTGTTGATAGAAGTATCAA  
ATGCGTATCGATGCAACTACTCATATTGGTGGAGTTCAGATTAAGCAGGAGTCAAGCCG  
ATTAAGACGGAACCAATTGCTCCACCACCATCATAACCAGGATTGAACAGTGTCCGTGGA

TCGTGTGCTCAGAATCCACTTCTTCGAAATCCAATTGTGCCAAGCACTAACTTCAAGCCA  
ATGCCACTACCGGGTGCCTATGGAAACTATCAAAATGGTGAATAACTCCAATCAATTGG  
CTATCAACATCCAACCTCATCTCCACTGCCTGGAATTCAATCGTGTGGAATTGTAGCTGCA  
CAGCATACTGTCGTTCTTCATCGGCTCTTCCAATTGATTTGGAAAATCTGACACTCCC  
GATCAGCCACTGATGGATACTATGGATGTTGATGCATTGATCAGACATGAGCTGAGTCAA  
GCTGGAGGGCAGCATATTCATTTTGATTTG

>Zebra\_finch\_FOXO3a

ATGCCGCGGGCGGGCTGGCGGCTCGCCCCGACAGCAAGCCTCCTCCAGTCACGACGAG  
TCGCTGCGTGCCTACTCAAGGACAGCGCAACCGTGGGCAACTTCGAGCTCGGTACCCGG  
GGATCCCACCGCCGACGCCCTCCTGATCCCCGAGGAGGAGGACGACGAGGAGGAGGGG  
GGCAGCTCGCCATGACCGTCGGCAGCGCGCCCCGCGGGCGGAGAAGCAGCGGCGGGC  
GCGGCGACCACCGCCGTGCCGGAGGAGGCGGCGGGCTGCTGGCCCCGCTGCCGCGGGC  
GGCCCCGAGGGGCCGAGCCTCTCGCCGGGGGAGCGGCGGGCGGCGGCGGCGGGGGG  
CTGAGCGGGGCCCGCGGCGGCGCCGAGGAAGTGCTCGTCGCGGCGCAACGCGTGGGGC  
AACCTCTCTACGCCGACCTCATCACCCGCGCCATCGAGAGCTCCCCGAGAAGCGCCTC  
ACTCTCTCCAGATCTACGACTGGATGGTCCGCTGCGTGCCTACTTCAAGGACAAGGGC  
GACAGCAACAGCTCGGCCGGTGAAGAATTCGATCCGGCACAACCTGTCACTCCATAGC  
CGATTTGTCAGGGTGCAGAATGAAGGCACCGGAAAAGCTCTTGGTGGATGATCAATCCA  
GATGGTGGAAAAGGCGGCAAGGCGCCCCGGCGACGCGCTGTGTCAATGGACAACAGCAAC  
AAGTACACCAAGAGCAGAGGGAGGGCAGCAAAGAAAAGGCAGCCCTGCAGACAGCCCAG  
GAGACGAGTGAGGACAGCCCTACCCAGCTCTCCAAGTGGCCAGGGAGTCCCACCTCCCGC  
AGCAGCGATGAGCTGGATGCATGGACAGATTTTCGCTCCCGTACAAATTCAAATGCCAGT  
ACGATCAGTGGCCGCTTGTACCAATTTGGCAAGCACCGAGCTCGATGATGTTCAAGAT  
GATGATGCTCCACTTTCTCCATGCTGTACAGTAGTCCATCGAGCTTGTCCCCATCGGTA  
AACAAACCATGTACTGTGGAGTTGCCAGGTTGACTGATATGGCTGGGACAATGAACTTG  
AATGATGGACTGACTGATAACCTCATGGATGATCTTTGGACAATATAACTCCCTCCC  
TCCCAGCAGTACCCACAGGAGGGATAATGCAGAGAAGCTCCAGTTTTCTTATGTTCC  
AAAGGTTCAGGGCTGGGCTCCCCATCAAGTAGTTTCAACAATGCTGTGTTGGGCCGTGC  
TCCCTGAATTCCTCCGCCAGTACCCATGCAGACAATTCAGGAGAACAAGCAGGCCACC  
TTCTCTCCATTTCTCATTACAACAACCAGACGCTGCAGGATCTCCTCACCTCTGATGCG  
CTTAGTCACAGCGATGTCATGATGACACAGTCTGACCCACTCATGTCACAAGCCAGCACG  
GCTGTGTCCGCCAGAATTCGCGCAGGAATATAATGCTCCGCAACGACCCCATGATGTCG  
TTTGCCGCACAGTCCAGCCAGGGCGGTCTGGTCAATCAGAACCTGTCCCATCACCAGCAC  
CAGTCCCACAACCTCTCTTAGTGGCAGCCGTGCCTTGCCAATTCATCAGTAACATA  
GGCTTGAGTGACTCCAGCAGCTTGGGATCCAGCAAACATCAGCAGTCATCTGTCAATCAG  
TCTATGCAAACTTTCTGACCCGCTGTCAGGCTCCTCTTTGACTCCTCTAGCGTGAAC  
CTCCCGGTCATGGACATGAGAAAATCCCGAGTACTTGGACCTGGATATTTCAATGGC  
AGCCTGGAGTGTGACATGGAGTCCATTATCCGAGTGAACCTCATGGATGCCGATGGGCTG  
GATTTAACTTTGATTCCTCATCTCAGCTCAGAACGTTGTCAGTCTGAATGTGGGGAAC  
TTCAGTGGTCTAAACAGGCTTCATCACAGAGTTGGGTACCAGGC

>Zebrafish\_FOXO3a

ATGGCAGAGGAGCTAGATAAGCCTTTGGCTGTGGACGTCGACATAGACCCTGATTTTGAG  
CCCCAAAAAGGCCAGGTCTTGACATGGCCTCTGCCAGACCCGAGTCCAATTCGGGGC  
AAAGCAGAACCTTCAGATGTGGGGATCATTCTGAAGAAGAGGTAGATGAAAATGGCACT

GATGATGCTTGTGCATCTGGTGACATTACAGGCGCATCAAAGCCTGCCAGTGTCACAGAA  
GGAGACCCGAGTTCTGCTGCTGCTCTTCTGCCATAGAAACGAACGCTTCTGCCAATGAT  
AAAGACATCTATGGCTCTCCTGGATCTTCCCAACACGCTCTAGCAGCATGCAGCGACTCC  
AGCATCAATGGTCTGATTCTCAGCAGCCCAGAAAATCCTCTGCCCGCAGGAACGCCTGG  
GGAAACTATTCTACGCCGACCTCATCACCCAAGCCATCGAGAGCTCGCCAGAGAAGAGG  
CTGACACTGGCCCAGATTATGATTGGATGGTCCGAAATGTGCCATACTTCAAGGACAAA  
GGTGACAGCAACAGCTCTGCAGGATGGAAGAACTCAATACGACATAACCTGTCGCTCCAT  
AGTCGCTTTGTCTAGAGTCCAAAATGAAGGAACAGGAAAGAGTTCATGGTGGATGGTCAAC  
CCTGATGGTGGAAAAGGGGGCAAAGCTCCACGCAGGCGTGCAGTATCAATGGACAACAGT  
AATAAGCTCATCAAGAGCGCCCGTGGCCGTGCCGCAAAGAAGAAAGCCGCTCTGCAGGCA  
TCCCAGGACGGAAGCTCTGAGAGTTCCTCCAGTCTGTCCAATGGACCGGCAGCCCCACG  
TCCCGTAGTAGTGACGAGCTAGATGCTTGGACAGATTTTCGTTCTCGCACTAATTCTAAT  
GCCAGCACCTCAGTGGACGTCTTCCCAATTCTAGCCAACCTGGAGGTGGATGAAGTT  
CCCAGTATGACTCTCCCTGTACCCATGCTGTACTCCAGCCCCAGCAGTATGTCTCCG  
TCCACTGGGCTCACCGAACTGCCACGTCTAGCTGACCTGCAGGAACTATGAACCTCAAC  
GATGGCCTCTCTGACAACCTAATGGATGACCTTCTGGACAACATCAGCTTGACGGCTTCA  
CAGTCTCCGGGCCATGATGAGAGTGGAGCCAACCTACAGGGAAGCCCTGTGTTTACCTTC  
AGCTGCTCTGGGAGCAGTCTGGCAATCCCTCCGGCAGCTATGGCACCAACTCCCTGTTT  
AGCCCTCCATCAGTCACTGGGCTGAGACAGTCTCAATGCAAACCATCCAGGAAAACAAG  
CAGGCAACATTCTCCTGCGTTCCCTCTTAGTGAGCAGAGTCTGCAGGATTTGCTCAGC  
TCTGAGTCCAGTAGTCGAGTATGTCCTTCTTACCCAATCTGACCCGCTTATGTCTCAA  
GCCAGTGCCTCCGTTTCTCTCAGAATGCTCGTCGATTTTGTGCGTAATGACCCCATG  
ATGTCCAACCAGGCTGGGCTGCAGGACAAGCAGGGCTCAAAAAGGCATCGCCATCTGGA  
TGCGGATGAACTGCGTCCCGAGCAGCGAGTCACTACCAAAGCTTGATGAAGCAACTC  
CAACAGTCTCCCTTCAGAAGCACATCTATGCAGCTCAACTCCTCCGATTCATTGTTGGCA  
GGTCTCAACGGCAGCGTGACCTCTGCTCAGTCGGTGTCTCAGGACCGTTTCTCATCTGAC  
TTGGATCTTGAGGCATTAGTGGCAGTTTCGATTGCGATATGGACATCATAACCCGCAAC  
GATCTGATGGATGCCGAAGGCTGGAGCTCAGCTTTGATTCCCATCTCATCTCCTCTCAG  
AATGCTAACCTGACTTCAGGGAGCTTCTCCAGAACCAAACGAACCTCCTCCCAAAGCTGG  
GTGCCAGGC

>Adelie\_penguin\_MRP5

ATGTACGCCAAGGTTTCTGGATCCAAAACTTGATTAACATTACCAGAGCTCTCTTTAAA  
GGCTTGACACAACAGGAGACCCACCAACAGTTAGCGAACCAAAAGAGTCTCTATGTAGTG  
GAGTTCGGGAGGAGCAGGGCCCTTGCCCATCGTGGTGGCACTGCCTGAGGGGACTGTC  
CGCGAGGATCCCGAGCTTGAAGATGAGGTTCCAGACACAAAGCTGGAGTGGAGTGAGGTG  
AAAGAAGCTCAGGGAATGAAGAAATCTCCCTGGGCAAATGTCAGACGGACAGTATGG

>common\_starling\_MRP5

ATGGCGGCGGGTGATGGCGGCCGGGTGGGCATGTGCCCGCGGCGGCTCCGAGCGGCC  
TGCGGAGGGTTTGCTTCTGTGCCAGTAAAGGGGGTTCAGTTCGTACTTCAGCCTCGCA  
TGGACTTTCAGACACGGTACTCCCTCTCTGTTCCCTGGACTGGGACAGTCAAGCAGTGC  
AGGAAAAGCAGTTTCTTCAATACCTTGACAGCTGATCAGCTATGGAAAGGAGCTTTGGCA  
GAGACTGGCGTGGGAGTAAAGAAAGGAAGAGGAAAGAAAAGGAAGAAAAGCTAAAGAAG  
AATCTTAATAGAGGCCAAGAGATTGGTGAAGGACGTTTCTGGTTTCTCTGGCCTGGTCTT  
AACGCTCCTGTGTGCAAACCTGGGAAAGTTCAGGAACTTGCCCAACGAAAAAAGAGGAA

CGAGAGAGAATTGAGACTGAAATTATTCAGCAGAGAGATACATGGGAGAAGAAAAAGAAA  
TAAAAATTAAGAGAGAGGGAGGATGGAGTGGAAAGTGCTGGGGAGGTATCATTCTGGAT  
CCTCTGACCCTGGCCCTAATGGAGAAAATTATGAAGATTTTGAACAAGAGTCATCGAG  
GTGAGAAATGTGTTTTGTATGAAGGCAAAGGAGGGCAGAAAAAATCAGTGCCTGCTTA  
GTGGCTGTTGGGAATGGTAAAGGGGCTGCAGGTTTTGCAATAGGGAAGGCAGGTGACAGG  
ACAAATGCTTTAAGGAAAGCAAAGAATAAAGCAATAAGCTCCTTACACTTCATAGAGCTA  
TATCAGAACCACACAATTTACCACGACATTTCTGCGAAATTTAAAAGGACAAAAATCCGC  
ATGAAGAAAACAAAACAAAGGGTATGGTCTGCATTGCCACAGAGCTATTATCACCATTGTC  
GGGCTAATTGGCATTAAAGGACATGTATGCCAAGGTCCTGGATCCAAAACTTGATTAAC  
ATCACCAGAGCTCTTTAGAGGCTTGACCCTACAGGAGACTCACCAGCAGCTTGCAAAC  
CAGAAGAACCTCTACGTGGTGGAGTTCCGGGAGGAGCAGGGCCCTCTGCCATCGTGGTG  
GCCCTGCCGAGGGGACTGTCCGTGAGGAGCCTGAGCCAGAGGATGAAGTTCTAAACACA  
AAGCTGGAGTGGAGGGAGGTGAAAGAAGCCAGGGAATGCTGAAATCTCCCTGGGCAAGT  
GCCAGACGGGCGGCGTGC

>central\_bearded\_dragon\_MRPS5

ATGGCCGTATGCTCTGGGCGTTGCAAAACGGAGCGGGTGGCCTTAGTGACCTGGAAATCG  
AGGGAAGGGAAGGGAAAGGGAGGGGGAAAGAAAGCGCTCACAGTACGGTGGCCACGAGGG  
AAACAAGAAGAAAATGGCGGCCCTTAGCATCGGCGGCCAAAGAGTCTGCAGCCCCTGG  
ATCTGGAGAACCGCGTGGAGAGGCTGTGCCTTATTCCATCTCATGGAGCCCATTGCCAG  
TACACGACATTGGCAAATGCTTTACAGAAACATTGCTATGTTTCTGCACCTCCCAGCGTC  
ACAGTGCAACAGTACAGACAAAGCAGCTTTTTCGGCAAATTGACAGCTGATGAAATCTGG  
AAAGCAGTTGTGGCACAGTCTAGTTCAAGTAAAAACAGAGCAAGAGGCAAAGGACCAAG  
AAGAAGATAAACTGAATCTCAATAGAGGCCAGATGATCGGTGAAGGAAGATCTGGGATC  
CTTTGGCCCCGCTCAGCGCCCCATCTTAAACCAGAGAAGCACGCTGGGGATTCAACGA  
CGAGAAAAAGAAGAGCAAGGGAAACTAATGTCGGAAAGGCTGATAAAGCGGGAGGAATGG  
GAGAAGAAAATGAGACGGAAGGTGAAGAAAGAGAGAGGCTTTACTGGAGCCTCCTGGAAC  
GGTATCAGTCTGGGACACCCTGATCCAAGCCCTGATGGAGAAACATATGAAGATTTTGAC  
TCCACGCTGATTGAGCTGAAAACGGTATCTACCATGACAGCCAAGGAAGGAAGAAGAAGG  
TCCTTAGTGCCTGGTGGTGGTTGGGAATAAAAAAGGGGCTGCTGGTTTTGCACTGGGG  
AAGCCAATGTAAAGCAGAATGCATTGAGAAAGGCAAAGAACAAAGCCATTCAATTTA  
CACTATATTGAAAGATAACAATAACACAATTTATCATGATTTTCAAGCACTTTTCAC  
CAAACAACCATCCGGATGAAGAAGCAAAGCAAGGGATATGGCCTTCACTGTCACCGAGCT  
ATCATTGCCATGTGCAAACCTGATTGGTATTGAAGATATGTATGCCAAGCTTTATGGATCC  
AACAACTCACTGAATCTTACTAAGGCTTTCTTCAAAGGCTTAGCAAATCAGAAAACCTCAC  
CAGAAGCTGGCAGATGAGAAGAGTCTTACGTAGTAGAATTTCTGGGACGAATGTGGCCCA  
CTGCCATCGTTGTTGCAAAGCCCCAAGGGCCGGTGAGGGAAGATCCTGAGCCTGAGGAT  
GAAGTTTCTGATATCATACCAGAGTGGAGAGAAGTGAAGGCTGCCAGGGAGCAAAGAGT  
CGCTGGGCAAATCTCAAAGAACAATTTGG

>Gecko\_MRPS5

ATGTTGGCATGTGCTTTGAGACACATTGCTGTATTTCTGCACCTCGTGATGTGACACTG  
GAACAGCGCAGGCAAAGCAGCTTTTTAAACAATTGACAGCTGACGAACTCTGGAAAGGA  
GTTTTGGCAGAGACTACGAGTGAAGGAAAGGAAGAGGGAAGAGGACCAAGAAAAAGCTG  
AAAAGGGATCTTAACAGAGGCCAGACAATTGGCGAAGGACGTTCAAGTTTTCTTTGGCCT  
GGCCTCAATGCTCCTGTGCTAAAAGGTGGAACAATCCAGACAATTGGACGGCGAGGTGAA



GAAGAGCGGGAGAAGATGCAGTTGGAAATCATCCGTCAGCGGGATGAGTGGGCGAAGAGG  
AAAAAACGAAGGTGAAGAAGGAGAGGGGATGGACTGGACGTTCTGGGGAGGTGTCAGC  
CTAGGGCCTCTGACCCGGGTCCTAATGGAGAAACATATGAAGACTTTGACTCCAGAGTG  
ATTGAGATGAAGAATGTATTTAATATGACAGCAAAGGAAGGAAGAAAAAATCTGTTAGT  
GCCCTGGTGGCTGTGGGAAATGGAAAAGGAGCTGCTGGTTTTCGCAGTGGGAAAAGCAACT  
GACAGGATGGCTGCATTACGAAAAGCAAAGAACAAGCAATTCATTTACTATATT  
GAAAGATATGAAGACCACACAATCTATCACGATATTGCAGTTTTCGTTAAAAAACAACC  
ATCCGGATGAAAAGAAAACAAGGGACATGGACTTCACTGTCACCGAGCTATCATTACT  
ATGTGCAAACGATTGGGATTAAGACATGTATGCCAACTTTATGGATCTAATAATCTA  
TTGAATCTACCAAAGCGCTCTTCAAGGGATTATCAAGACAGGAACTACCAAGCCCTA  
GCCAATAAGAAAAGCCTCTATGTGGTAGAATTTCTGTGAGGAATGTGGCCCCCTGCCATC  
GTGATCGCTGCACCCAAGGGTCCCCAGGGAAGACCCTGAGCCTGAGGATGAAGTTCCT  
GATGTGAAGCTGGAGTGAACGAAGTGAAGGCAGCCCAAGGAATGAAGAAGTCTCCCTGG  
GCAAACGCCAGAAGACCAGTGTG

>Taiwan\_habu\_MRPS5

ATGGCGGCCGCCGTAGTTGTCGCGGCCAGAGAGTCTGTAATGTCGGCATCCTCAGGACC  
GCGTGCAGAGGTTATGCTTTGATTTCAAACCATGGAATTAGTTGCCAGCATGCTGCCTTG  
GCATGGACTTTTCAGACACATTGCAACATTTCTGCATCATATAATGTGACAGTGCAACAG  
AGAAGGCAGAGAAGCTTTTTCAATAAATTGACAGCCAGTGAACCTCTGGAAAGGAGTTGCA  
GCAGAGAATACTGCAGGTGGAAGGAAGGGGCGAGGCAAGCGAGGCAAGAAGAAAAAACA  
AGGGATCTCAATCGAGGCCAGTTCCTTGCGAAGGAAAAATCGTTTTCTTTGGCCTGGC  
CTCAATGCTCCATTGATGGTATCTGAAAAAGTTCAAAGCATTGCTCAGAGAGATGAAGAA  
GAGCAGAAGGCATTGCAGTTAGCAAAAGCTGAGGAAATAAAACAACCTAGACAAAAGAAGG  
AAAATACGGATTAAGAAGGAGAGAGGTTGGACTGGACGATCCTGGGGAGGTGTCAGTTTA  
GGACCTCCTGATCCTGGTCCCAATGGAGAAACATTTGAAGATTTTGATAGCAGAATACTT  
GAGCTAAGATCCGTATTTAACATGACTGCAAATGAAGGCCGAAAAAGATCTATGAGGGCC  
CTCGTGGCTGTTGGCAATGAAAAGGATCTGCTGGTTTTGCTCTAGGAAAAGCATCTCAC  
ATGAAGAATGCACTAAGAAAAGCAAAAAACAAGCTATTCACCATTTACAGTATGTTGAA  
AGATATGACGATCATACAATTTACCATGATATTGCAGCTACTTTAAGAAAACAACAATT  
CGGATGAAGAAGCAAAACAAGGGTATGGTCTTCGTTGTCACCGTGCTATCATCACACTC  
TGCAAACGATTGGGATTAAGACATGTATGCCAGGGTTTATGGATCCAATAATATATTG  
AATCTCACTACGTGTCTCTTTAAGGGATTAGCTAATCAGGAACTCATCAAATCTAGCA  
AACAAGAAGAAGCTCTACGTGGTAGAATCCGTGAAGAATGTGGCCCACTGCCATTGTT  
GTAGCAAAGCCTAATGGACCAGTCAGAGAAGATCCTGAATCAGAAGAAGCAGCTCTTGAT  
GTCAAATTGGAATGGAAGAAGTGAAGGCAGCACAAAGGAATAAGGAGTAGATGGGCTGAT  
GTCAAAGAGCTGTTTGG

>green\_sea\_turtle\_MRPS5

ATGGATTATGTGCTTACAGAAAAAGGGCCCATCATTGATCACCTCTTAGCAGAAGCTGGA  
AATGTGTGCAATTTATTACAGTGACAGCTAATGAGCTGTGGAAAGGGGTTTTGGCAGAG  
ACTGGTGTGGAGCAAGGAAGGGAAGAGGAAAGCGAACCAAGAAAAAGTTCAGGAGGGAT  
CTCAATAGAGGCCAGATCATTGGTGAAGGACGTTCTGGTTTTCTTTGGCCTGGTCTCAAT  
ACTCCTGTGCTGAAAAGTGGGGCACTCCAGACAATTGGTCAGCGAGACAAAGAGGAGCAG  
GAGAAGGTGCAGTCTGAAATTATCCGGCAGAGGGATGAGTGGGAGAAGAGAAGAAAAACA  
AAGGTGAAGCGAGAGAGAGGCTGGACTGGAAGTTCCTGGGGAGGCATCAGTCTGGGACCC

CCTGAGCCAGGTCCTAATGGAGAACTTACGAAGACTTTGACTCCAGGGTAATTGAGGTG  
AAAAATGTATTTAATATGACAGCAAAGGAAGGAAGAAGAAGATCAGTTAGTGCCCTAGTG  
GTTGCTGGAAATGGAAATGGGGCTGCAGGTTTTGCCGTGGGAAAAGCAAGTGACAGGATG  
ACAGCTTTAAGAAAAGCAAAGAACAGAGCAATTCACTATTTACTATGTAGAGCGATAT  
CAAAACCACACAATTTACCATGATATTACAACAACCTTTAAAAAACAACCATCCGGATG  
AAGAAGCAAAACAAGGGCATGGTCTTCATTGCCATCGAGCCATCATTACCATCTGCAAG  
CTAATTGGGATTACAGACATGTATGCCAAGCTTCTGGATCCAACAATCTGCTTAACCTC  
ACCAGAGCTCTCTTAAAGGTTTAGCAAAAACAGGAAACCCATCAAGAACTAGCAGATAAG  
AAAAGCCTCTACGTGGTAGAATTCGTGAGGAGTGTGGCCCCCTGCCGATCGTAGTTGCT  
TCACCTAATGGAGATGTCAGGAAGGAACCGAACCTATTGATGAGGTTCCCAATACCAAG  
CTGGAATGGAGTGAAGTGAGAGTAGCTCAAGGAATGAAACGTTCTGCCTGGGCAAATGTC  
AAAAGGACAGTGTGG

>Chinese\_alligator\_MRPS5

ATGGCGGTGGTGGGGCGGCTGTGCGCCTCGGTGGCCTGGAGGGCAGCGTGGAGAGGCTAC  
ATCTCGCTACCAGTCAACGGGAGTGGCTGTGATATACGAACTTAAGGTGGGCACTGCAG  
ACACATTGTTACATTTCTGCTCCATGCGGTGTGACTATACAGCAAAGCAGGCAAAGCAGT  
TTCTTCAACAAATTGACGGCTGATGAACTATGGAAAGGAGTTCTGGCAAACACTTCTTCG  
AGAGCAAAGAGAGGAAGAGGAAAGCGGACAAAGAAAAAATTAAGGAAGGATCTCAATAAA  
GGGCAGATGATTGGTGAAGGGCGTTCCGGAATTCTTGGCCTGGTCTCAGTATCCTGTG  
ATGGTAGATGGAAAAGCCCAGGTAATTTCCAACACAAAAAAGAGCAAAGGGAGATTCAA  
GATGAAATTTTACGTCGGAGGGATGAATGGGAAAAAAGAAAAGTAAAGGTGAAGAAA  
GAGAGAGGATGGACTGGACGATCCTGGGGGGGCATCAGTCTAGGACCTCCTGACCCTGGT  
CCTAATGGAGAAACATATGAAGGCTTTGACTGCCAAGTACTTGAGCTGAAAAGCGTAGCT  
TGTATGACAGGAAGAGAAGGGCGGAAAAGATCTGTGAGTGCCCTTGTGGCTGTTGAAAT  
GGAAATGGGGCTGCAGGTTTTGCATTGGGGAAAAGCAAAGACAGAATGGTAGCTTTAAGA  
AAGGCAAAGAACCAGGCAATTCATATTTACTATATAGAACGATACCAGGACCATACA  
ATTTATCATGACATTACGACAACCTTTAAAAAACAACCATCCAGATGAAAAAACAAC  
AAAGGGTATGGTCTACGTTGTCACCGAGCTATTATCACTATCTGCAAACCTCATCGGGATT  
ACAGACATGTATGCCAAAGTGTGTGGATCCCCTCATATCCTTAACCTCACCAAAGCACTC  
TTAAGGGATTGGCAAACAGAAAACCCACCAGGACTTGGCAAATGAGAAGAGCCTCCAT  
GTGGTGAATTTCTGTGAGGAGCAAGGCCATTGCCTATCCTTGTGGCTTCCCCTCAGGGG  
ACAGTCAGAAAGGATCCCGAGACAATAGAGGAGGTTCCAGATGTCAAGCTGGAGTGAAT  
GAAGTAAGGGTGGCACACAGAAGGGGAAGGTCTGCCTGGTCCAGTGTCAAGAGAATGGCA  
TGT

>Gharial\_MRPS5

ATGGCGGCTGTGGGGCGGCTGTGCGCCTCGGTGGCCTGGAGGGCGGCGTGGAGAGGCTAC  
ATCTACTACCAATCAACAGGAGTGGATATACAACTTAGCGTGGGCACTGCAGACACAT  
TGTTACGTTTCTGCTCCATGCAGTGTGACTGTACAGCAAAGCAGGCAAACAGTTTCTTC  
AACAAATTGACGGCTGATGAACTGTGAAAGGAGTTCTGGCAAACACTGCTTTGAGACCA  
AAGAAAGGAAGAGGAAAGCGGACAAAGAAAAGAATAAGGAAGGATCTCAATAAAGGGCAG  
GTTCTTGGTGAAGGGCTTCCGGAATTTTGGCCTGGTCTCAATTCTCCTGTGATGGTA  
GAAGGACGAATGCAGGCAATTTCCCAAAGCAACAGAGAGCAAAGGAGATTCAAACCTGAA  
ATTTTTCGTCGGAGGGTTGAATGGGAAAAAAGAAGAAAAGTAAAGGTGAAGAAAGGGAGA  
GGATGGACTGGACGATCCTGGGGGGCATAAGTCTAGGACCTCCTGACCCTGGTCTAAT

GGAGAAAAATGAAGACTTTGACTGTCAAGTACTTGAGCTGAAACATGTAGCTAGTATG  
ACAGGAAGAGATGGGCGGAAAAGAACTGTGAGTGCCCTTGTGGTTGCTGGAAATGGAAAT  
GGGGTGCAGGTTTTGCAGTGGGGAAAAGCAAAGACAGGATGACTGCTTTAAGAAAAGGCA  
AAGAACCAGGCAGTTAACTATTTACACTATATAGAACGATACCAGAACCATACAATTTAT  
CATGACATTACGACAACCTTTTAAAAAAACAACCATCCAGCTGAGAAGACGACGCAAAGGG  
CATGGTCTACGTTGTACCGGGCTATTATCAGTATCTGCAAACCTCATCGGGATTACAGAC  
TTGTATGCCAAACTATGTGGATCCATAATATACTTAACCTACCAAAGCACTCTTTAAG  
GGATTGGCAAACCAGAAAACCCACCAGGACTTGGCAAATGAGAAGAGCCTCCACGTGGTG  
GAATCCGTGAGGAGCAAGGCCGTTGCCTCTCCTTGTGGCTTCCCCTCAGGGGACAGTC  
AGAGAGGATCCCGAGATAACAGAGAATGTTCCAGATGTCAAGCTGGAGTGGAATGAAGTA  
AGGGTGGCACACGGATTGAGACGTTCTTCTGGTCCAATGTCAAGAGAATGGGGTGG

>Tibetan\_frog\_MRPS5

ATGGCGGCTGTGAGATGGTGTAGCGGTGTCCTCCGCTCTGTTTATAGAGGTGGGATCTCT  
GCACCAGTGATAAGGACCAGCTGCCAATCCACAGCCTCAGACTTCCACAGCTTCCACAA  
GAACCATGTTACTTATCGACTTATCACAATGTCTCTATTAGCAAGCAAGGCTGGCAAGC  
AGTTTCTTTGGCAAATTGACAGCAAATGAGCTGTGGAAGGAGTGTGGCAGATACGTCA  
GGAGGATCTCGTAAGGGAAGAGGTAAAAGAACCAAGAAGAGGATTAAGAAAGAAATCTGAAC  
GTTGGACAGCGTATTGGAGACGGAATCTGGATTCTGTGGCCAGGCTTGAATCACCT  
ATAGTATTGAACAAAAAGGAGCAAAACATTGAACAGCGGAATAAAGAGCAGCAGGAAGAA  
AGGCAAGCTCAGATATTTAAGGAGAGAGATCAGTGGGAGAAAAGAAGAAGACCAGAGTT  
AGAAGAGAAGAGAGAGGATGGACTGGAAGAAGCTGGGGTGGACTCAGCGTTGGAAAACCT  
GATCCAGGTCTTAATGGAGAAAAATGAAGATTTTGAATGCAGAGTGATTGAGCTGAAA  
AGTGTATTACCATGACAGCCAAAGAAGGAAGGAAGAGAAGTATGAGTGCCTTAGTGGTG  
GTTGGCAATGGCAATGGAGCAGCTGGGTTTGCAGTTGGAAAATCCAACGACAGAGCGATA  
GCACTAAGAAAAGCAAAGAACAGAGCTGTCCATTATCTGCATTACGTAGAACGATAACAAC  
AATCATACAATATATCATGATATCACAACAAAATTTAAGAGAACAACAATTAAGAAATGAAG  
AAACAAAACCCAGTTATGGTCTTCATTGCCATAGAGCAATCATCACTATCTGCAAACCTG  
ATTGGCATCAAGGACATGTATGCCAGGTTGTCAGGTTCTACAATCTGCTTAACATTACA  
AATGCACTCTCCAGGGTCTGACCAAGCAGGAAACGCATCAAGAACTAGCCAGCAGAAAA  
GGTCTACATGTTGTGGAGTTTAGAGACGAATGTGGTCCCCTTCTAGAATTGTGGCTACA  
CCTCATGGACCTCTTTCAACAGTTCCCGAACCTGAAGGGGAAATAGTTGACACACCACTC  
GACTGGGATGATGTTAAGGTGACCCAGGGAATAAAGCGCTCTGTCTGGCCAATGTGAAA  
AGGACAATTTGG

>southern\_platyfish\_MRPS5

ATGGCGGCGTCCGTATGGGTGTGCAGTGCCCTCCGCATCACGCTCGGAGGCGCAGCATCA  
CTCCGCACCACGGTGGGAGCTGTTTACAGATGTCTCACTTTGTCTGTGCAACCTCAGCAGGC  
TCTCTGCAGAGACGCCAGAGTTTCTGTTGAACCCGTCAGCAACCTGGCAGCAGAGCAGA  
CATGGCAGTTTCTTCAACAAGTTGACGGCTGAGGAACTGTGGAGGGGTGTGTTGGCTGAA  
TCCGGAGCCGGAGCCAGAAAGGGCAGAGGGAAGCGAACCAACGCAAACCTGAGGAGAGAC  
CTCAATCGAGGACAGCTGATCGGAGAAGGTGAGGTTGGTTTTTGTGGCCCGGTCTGAAT  
TCTCCTGTATTAAGACGGCGCGGTACAGAGCTTACGCCGAAGAAGCGACGCCGAGCAA  
CAGGAAGTTCACGCTGAACTAATGCGGCAGAGGGACGAGTGGGAGAAGAGGAGGAGGATG  
AAGGTGAAGAGAGAGAGAGGCTGGACCGGAAGCTCCTGGGGGGGCATCAGCCTGGGGCAG  
CCTGACCCCGGACCCAATGGAGAAACCTATGAAGACTTCGATTCTCGAGTCATTGAGGTG

AAGAGCGTGTTC AACATGACGGCCAGGGAGGGCAGGAAAAGGTCCATCAGCTGTTTGGTT  
GCTGTAGGAAATGGCAACGGAGTGGCAGGGTTCGCTTTGGGTAAAGCAACAGACAGAAT  
GCAGCTCTGAGGAAGGCCAAGAACCGAGCCAAACGCCATTTGTACCACATTGAGCGATAC  
AACAAACCACACCATTTATCACGACATCAACTCCAGGTTCAAGAGGACGACTCTGCGCATG  
AAGAAGCAAAACGAGGGTTACGGTCTGCGCTGCCACAGGGCCGTCATCACGCTGTGCAAG  
CTGATCGGCATCAAGGACATGTA CTGCAAAGTGGACGGCTCGGTCAATCTCCTCAACATC  
ACGCGGGCGCTCTTACTGGGTTAGCCAATCAGGAACTCATCAGAACCTGGCCAACAAG  
AAGCAGCTCCACGTGGTGGAGTTCCAGGCCACCGGGGCCGCTGCCCGTGGTGGTGGCC  
AGCCCGAAAGACGGAGCGCTCTCCAGCCGAGACCGTGGACGAGGTCCCAACACCAAG  
CTGCACTGGGACGACGTCCGAGACGCGCAGGGAACCAAGCGCTCCATCTGGGCGGGGGTG  
AAGCGCACCGTGTGG

>spotted\_gar\_MRPS5

ATGGCGGCGGCCAGATGGGTATGGTCTGCCCTCCGGATACCTGTGAGAGGGGGTATCCTG  
GTCCCAACACAGGCTTGTACTAGTGTGTACAAACCACCTGGGCCGTCTTTCAACCACT  
GCCAGCGTCTCCGTGCAGCAGTACAGATTCAGCAGTTTCTTCAACAAATTGACGGCTACT  
GAGTTATGGAGGGGGGTGCTGGCAGAGAGCGGGCCAGGGGCACGGAAGGGAAGGGGGAAG  
AGA ACTAAGCGAAAGCTGAAGAAAGACCTCAACAGAGGGCAGAGTGTGCGAGAAGGACGA  
GGAGGCTACCTCTGGCCCGCCTGAACTCGCCTGTGCTGAGAAGTGGTACCATCCAGTCC  
ATCTCCAGAGGGACCAGGCCAGCAGGAGGAGCTGCAGGCGGACATTGTCCGCCAGAGA  
GACGAGTGGGACAGGAAGAGGAGGACGAAGGTGAAGAGGGATCGGGGATGGACCGGGAAT  
TCCTGGGGGGGGATCAGCTCGGATCGCCAGATCCTGGGCCGTACGGAGAAACATATGAA  
GATTTGATTCTCGGGTGATTGAGGTGAAAAGCGTTTTCAACATGACAGCGAACGAGGGA  
AGGAAGAGATCGATCAGTGTCTGGTCTGCTGCGAAATGGGAATGGGGCAGCAGGTTTT  
GCTTTGGGGAAGGCAGCCGACCGAGCAACTGCACTTCGAAAAGCGAAGAACAAAGCTGTC  
CATTATTTGTACTACATAGAGCGATAACAACAACCACACAATCTATCATGACATGACTTCC  
ACCTTCAAGAGAACCACCCTCCGGATGAAGAAACAAAGCAGAGGTAAGTCTGGCACTGCC  
AGGGCAGTACATGCCTCTCTCTGTTTGTGGTCC

>guppy\_MRPS5

ATGGCGGCGTCCATATGGGTGTG CAGTGCCTCCGCATCACACTCGGAGGAGCAGCATCA  
CTCCGTACCGCGGTGGGAGCTGTT CAGATCTCTACTTTGCCTGTGCAACCTCAGCAGGC  
TCACTGCAGAGACGCCAGAGTTTCTGTTGAACCCATCAGCAGCCTGCCAGCAGAGCAGA  
CATGGCAGTTTCTTCAACAAGTTGACGGCTGAGGAACTGTGGAAGGGTGTGTTGGCCGAA  
ACCGGAGCCGGAGGCAGAAAGGGCCGAGGAAAAGCGAACCAACGCAAAATGAAGAAAGAT  
CTCAATCGAGGACAGGTGATCGGAGAAGGTG CAGGTGGTTTTTTGTGGCCCGTCTGAAT  
TCTCCCGTATTTAAAGACGGCGCCGTGCAGAGCTT CAGCCGAAGAAGCGACGCCGAGCAA  
CAGGAAGTTCAAGCTGAACTAATTCGGCAGAGGGACGAGTGGGAGAAGAGGAGGAGGATG  
AAGGTGAAGAGAGAGAGAGGCTGGACCGGAAGCTCCTTGGGAGGCATCAGCCTGGGGCAG  
CCTGACCCCGGGCCCTATGGAGAAACCTATGAAGCTTTGATTCTCGAGTCATTGAGGTG  
AAGAGCGTGTTC AACATGACAGCCAAGGAGGGCAGGAAGAGATCCATCAGCTGTTTGGTT  
GCTGTAGGAAATGGCAACGGAGTGGCAGGCTTCGCTCTGGGTAAAGCAGCAGACAGAATT  
GCAGCTCTGAGGAAGGCCAAGAACCGAGCCAAACGCCATTTGTACCACATTGAGCGATAC  
AACAAACCACACCATTTATCACGACATGGACTCCAGGTTCAAGAGGACGACTCTACGCATG  
AAGAAGCAAAAGCGAGGGTTACGGTCTGCGCTGCCACAGGGCCGTCATCACGCTGTGCAAG  
CTGATCGGCATCAAGGACATGTA CTGTAAGTTGAAGGCTCGGTCAATCTCCTCAGCATC

ACTCGGGCGCTCTTCACTGGGTTGGTCAAGCAGGAACTCATCAGAAGCTGGCCAACAAG  
AAGCAGCTCCACGTCGTGGAGTTCCAGGCCAGCGGGCCCGCTGCCAATGGTGGTGGCC  
AGCCCCAAAGACGGAGCGCGTCTCCAGCCGAGTCCGTGGACGAGGTCCCCGACACAAA  
CTGCACTGGGACGACGTCCGAGACGCGCAGGGAACCAAACGCTCCATGTGGGTGGGGCTG  
AAGCGCACCGTGTGG

>American\_alligator\_MRPS5

ATGGCGGTGGTGGGGCGGCTGTGCGTCTCGGTGGCCTGGAGGGCAGCGTGGAGAGGCTAC  
ATCTCGCTACCAGTCAACGGGAGTGGCTGTGATATACGAACTTAAGGTGGGCACTGCAG  
ACACATTGTACATTTCTGCTCCATGCGGTGTGACTGTACAGCAAAGCAGGCAAAGCAGT  
TTCTTCAACAAATTGACAGCTGATGAACTATGAAAAGGAGTCTGGCAAACACTTCTTCG  
AGACAAAAGAAAGGAAGAGGAAAGCGGTCAAAGAAAAAATTAAGGAAGGATCTCAATAAA  
GGGCAGATTATTGGTGAAGGGCGTCCGGAATCTTTGGCCTGGTCTCAGTATTCCTGTG  
ATGGTGGATGGAAAAGCCCAGGTAATTTCCCAACACAAAAAAGAGCAAAGGGAGATTCAA  
GATGAAATTTTACGTCGGAGGGATGAATGGGAAAAAAGAAAAGTAAAGGTGAAGAAA  
GAGAGAGGATGGACTGGACGATCCTGGGGGGGCATCAGTCTAGGACCTCCTGACCCTGGT  
CCTAATGGAGAAACATATGAAGACTTTGACTGCCAAGTACTTGAGCTGAAAAGCGTAGCT  
TGTATGACAGGAAGAGAAGGGCAGAAAAAATCTGCGAGTGCCCTTGTGGTTGTTGAAAT  
GGAAATGGGGCTGCAGTTTTGCATTGGGGAAAGCAAAAGACAGACTGGTAGCTTTAAGA  
AAGGCAAAGAACCAGGCAATTTACTATTTACTATATAGAACGATACCAGGACCATACA  
ATTTATCATGACATTACGACAACCTTTTAAAAAACAACCATCCAGATGAGAAAAAACAC  
AAAGGGTATGGTCTACATTGTCACCGAGCTATTACTGTCTGCAAACCTCATCGGGATT  
ACAGACATGTATGCCAAAGTGTGTGGATCCCCTCATATGCTTAACCTCACCAAAGCACTC  
TTAAGGGATTGGCAAACAGAAAACCCACCAGGACTTGGCAAATGAGAAGAGCCTCCAC  
GTGGTGAATTTCTGTGAGGAGCAAGGCCATTGCCTATCCTTGTGGCTCCCCTCAGGGT  
GCAGTTAGAAAGGATCCTGAGACAATAGAGGAGTTCCAGATGTCAAGCTGGAGTGAAT  
GAAGTAAGGGTGGCACACAGAAGGGGAAGTTCTGTCTGGCCAGTGTCAAGAGAATGGCA  
TGT

>tropical\_clawed\_frog\_MRPS5

ATGGCGGCGCTGAGGTGGTGCAGTAGTGTCTCCGTACAGCATGTAGAGGAGGAATCTTC  
TTGCCAACAGTACGAAGCAGCTGCCAGAACAGTCACTTGGCCAACATACTCAAGTGCAC  
CCATGTGTTTCTGTACTTCACAGTGTACTATTCAACAAAACAGGCAAAGCAGCTTCTTT  
AACAAAGTTGACTGCAAATGAACTATGGAGAGGAGTTTTGGCAGAAAAGTGGGACAGGTGCA  
CGGAAGGGAAAGAGGCAAAGAACAAGAAAAAGCTTAAGAAAGATCTCAACCGCGGACAG  
ATCCTTGGAGAAGGGAGATCTGGATATCTATGGCCTGGGTTGAATGCACCTATTGTAAAG  
AGTGGCTCAGTACAGACCATTGCAAAGAGGGATCAGGCACAGCAGGAGGAAATGCAAGCA  
GAAATCATAAAGCAACGAGACGAATGGGACAAAAGAGGAAAATGAGAATCAAACGAGAG  
AGAGGCTGGACTGGGAACAGTTGGGGTGGTGTAGCATTGGAGTCCCAGATCCAGGGCCT  
AATGGAGAAACCTATGAAGATTTGACTGCAGAGTAATTGAGGTTAAAAATGTTTTCAAC  
ATGACTGCTAAAGAAGGGAGAAAGAAATCTGTGAGTGCCTTGGTTGTTGGGAATGGA  
AATGGAGTGGCAGGATTTGCTCTTGGTAAGGCCAGTGACAGAATGATAGCTTTAAGAAAA  
GCAAAAAACAGAGCTGTTCACTATCTGCACTATATAGAGCGATATAACGATCATACTATA  
TACCATGACGTAACCTTCTTCTTTAAGAGGACATCAATAAGAATGAAGAAACAAAACCTTA  
GACTTATGGTGTGAAGATCGAAATCCAGAAAACGCCAGATCCCAAGCATTCTACTTAACA  
GGATATGGTCTTCATTGCCATAGGGCAATAATCACTATCTGCAAATTAATTGGCATCACA

GACATGTATGCAAAGGTTTCTGGATCGATCAATCTGCTGAATCTTACAAGGGCACTTTTC  
CTTGGTTTTGCAAAGCAGGAGACACACCAGGAAGTTGCAGACAATAAGGGTCTTCACGTG  
GTTGAATTTAGAGAGGAGCGGGGCCCTTGCCTGTCATCGTAGCCTCTCCAAGGGAGCC  
CTCCGAAAAGAACCAGAGCTTGAAGGAGAGGTTCTGACACCAAAGTGGACTGGGACGAT  
GTGAAAGCAGCTCAAGGAATGAAGCGTTCTATTTGGGCAAATGTCAAGAGGACATCTTGG

>Flycatcher\_MRP5

GCCGGCCGGCGTGTGCCCGCGCGCTGCGAGCGGCCTGGCGAGGATTTTCTTCTGTG  
CCAGTGAAAGGGGGTTGCAGTTCTACTCCAGCCTGGCATGGGCTTTCAGACACAGTGC  
TCCCTCTCTGCTCCCTGGACTGGGACAGTCCAGCAGTGCAGGAAAAGCAGTTTCTCAAT  
ACCTTGACAGCTGATCAGCTGTGGAAAGGAGCTTTGGCAGAGACTGGCGTGGGAGTAAAG  
AAAGGAAGAGGAAAAGAAAAGGAAGAAAAAGCTAAGGAAGAATCTCAATAGAGGCCAGGAG  
ATTGGTGAAGGACGTTCTGGTTTCTCTGGCCTGGTCTTAATGCTCCAGTGTGCAAAC  
GGGAAAGTGCAGCAACTTGCCCAACGAAAAAAGAGGAACGAGAGAGAATTCAGACTGAA  
ATTATTCAGCAGAGAGATACATGGGAGAAGAGAAAATAAAAAATTAAGAGAGAGGGA  
GGATGGAGTGGAAAGTGCTGGGGAGGGATCATTTTGGATCCTCTGACCCTGGTCTAAT  
GGAGAAACTTATGAAGATTTTGAACAAGAGTCATCGAGGTGAGAAATGTATTTGTATG  
AAGGCAAAGGAGGGCAGAAAAAGTCAGTACGTGCCTTAGTGGCTGTTGGCAATGGTAA  
GGGGCTGCAGTTTTTGAATAGGGAAGGCAGGTGACAGGACGAATGCTTTAAGGAAAGCA  
AAGAATAAGGCAATAAGCTCCTTACACTTCATAGAGCTGTATCAGAACCACACAATTTAC  
CACGACATTTCTGTGAAATTTAAAAGGACAAAAATTCGCATGAAGAAACAAAACAGAGGG  
TATGGTCTGCATTGCCACCGAGCCATTATCACCATCTGCAGGCTAATTGGCATTAAAGGAC  
ATGTATGCCAAGGTCACTGGATCCAAAAGTGTGATTAACATCACCAGAGCTCTCTTTAGA  
GGCTTGACCCTCAGGAGACTCACCAGCAGCTGGCAAACCAGAAGAGCCTCTACGTGGTG  
GAGTTCCGGGAGGAGCAGGGCCCCCTGCCATCGTGGTGGCCCTGCCGAGGGCACTGTC  
CGAGAGGAGCCTGAGCCAGAGGACGAGGTTCCGAACACAAAGCTGGAGTGGAGGGAGGTG  
AAGGAAGCCAGGAATGCTGAAATCTCCCTGGGCAAGTGTGACAGCGGGCGGCGTGC

>Armadillo\_MRP5

ATGGCGGCGGCGGTGCGCGCTGCGGGCTGCCTCCGCGCGCTGAGCGGCGCGGGCGGGT  
CATTTCTGGTTCGAGGCAGCTTATCTAAACACCTTCTCAGCAGCTTCCATTTTAGCTCTG  
AAGACAGGCCTCAGCATTGGCCCTTTGTCGCCCCAGGACCCAGAGATCACCGACCTTTT  
GCCAGCTTGAGCCATGCGCTCCAGACACAGTGTGATTTCTTCTCCAGGAGCTTGGTG  
GGCCAACAGCATAGACCCTACAGTCTTCTACTAAGTTGACAGCAGATGAGCTCTGGAAA  
GGAGTTCTGGCTGAGACTGGCGCTGGAGCAAGAAAAGGAAGAGGCAAAGGAGCAAGAAA  
AAGAGAAAAAAGGATTTGAACAGGGGTGAGATCATTGGTGAAGGGCGTCACGGCTTCTG  
TGGCCGGGTCTGAACGCCCTCTCATGAGGAATGGGGCCGTGACAGACCATTGCCAGAGG  
AGCCGGGAGGAGCAGGAGAAGGTGGAGGCGGACATGGCGCAGCAGAGAGAAGAGTGGGAG  
CGGAAGAGGACGGCGAAGGTCAAGCACGCGGAGGATGGAGCGGGAAGTCTGTTGGGGCGG  
CTCAGCCTCGGCCCCCGACCCTGGCCCTCACGGAGAAACGTATGAGGATTTGATACG  
CGGATACTCGAGGTTAGAAATGTGTTCAACATGACCGCAAAGAGGGAAGAAAGAGATCA  
GTCCGCGTCTGGTGGCTGTGGGGAATGGAAGAGGAGCTGCAGGTTTTGCCATTGGGAAA  
GCTGCTGAACGGGTGGATGCATTGAGAAAAGCAAAGAACAGAGCAATCACTATTTGCAC  
TACATAGAACGCTATGAAGACCATAACAATCTTCATGACATTTCTTTAACATTTAAAAGG  
ACACATATCAAGATGAAGAAACAGCCAGAGGTACGGCCTCCGCTGCCACCGCGCCGTG

ACCACCATCTGCCGGCTCATCGGCATCAAGGACATGTACGCCAAGGTCTCGGGCTCCATG  
AACATGCTCAGCCTCACGCGGGGCTCTCCGCGGGCTCTCGCGCCAGCCTGATTCAAGC  
AAATTGTGTAACCAATCTTTTTTATCTGAAAAGTGAGGCCATCCGAACAATTCCT  
GGATATTTGAGGATAGTGAGTACTGGTATGGTGGTATTGTGCGACCTTTTAAAGTGCCT  
GTTTTAGAGATAGATGCCGAAATACCTACGGATGATGTGGAACGGTATCTGGGGCTTAGG  
CGCACTGTGTGGTTCGGGCTTGAAGAGGGCCGCCACG

>Chicken\_MRPS5

ATGGCGGCGCGGTGGTGGCGGCGGCCGGCGGGTGTGCGCCTTTGGTGTCTGCGAGCG  
GCCTGGCGAGGGTTTGTCTGTACCAGTGAAAGGGAGCTGCTGTTCTATTCTAGCTTG  
GCGTGGTCTCTCCAGGTGCGGTGTCCATCTCTGTCTCTCAGAACGTGATTGTACAGCAA  
TGCAGGCAAAGCAGCTTCTCAATACATCGACAGCTGAGGAGCTATGGAAAGGAGCTTTG  
GCAGAGACTGGTGTGGGGTAAGGAAAGGAAGAGGAAAGAGAAGGAAGAAAAAGCTGAAA  
AAGAATCTCAACAGAGGCCAGGAGATTGGGGAAGGACGCTCTGGTTTCTCTGGCCTGGC  
CTTAATGCTCTCTGATAAAAAGTGGGAGAGTACAGACACTTACTCAAAGGAAAAAGAA  
GAACGAGACAAAATCCAGTCTGAGATTATTCAGCAGAGAGATACGTGGGAGAAGAAAAGA  
AAAATAAAAATCAAGAGAGAGGGAGGCTGGAGTGGAAAGTGTGGGGAGGTGTCCTTTTG  
GATCCTCCTGACCCAGTCTAATGGAGAACTTACGAGGATTTTGAACAAGAGTCATT  
GAGGTGAAAAATGTGTTTTGTATGAAGGCGAAGGAAGGCAGGAAAAAATCAATACGCGCC  
TTAGTGGCTGTTGAAATGGTAAAGGGGCTGCAGGTTTTGCACTGGGGAAAGCAGGTGAC  
AGGATGAACGCTTTACGGAAGCAAAAACAAAGCAATACGCAGCTTACATTTTATAGAG  
CTATACCAGAACCACACAATTTACCATGATGTTACAGTGAATTTAAACGCACACACATC  
CGCATGAAGAAGCAAAAACAAAGGGTATGGTCTTCGTTGCCACCGAGCTATTATTACCATC  
TGCAAATAATTGGCATTAAAGACATGTATGCCAAGGTTACTGGATCCAAAACTTGATT  
AATATTACCAGAGCTCTCTTTAAAGGATTGACACAACAGGAGACTCACCAGCAGTTGGCA  
AACCAGAAAAACCTCTACGTGGTGAATTCGTGAGGAGCAAGGCCACTGCCATTGTC  
GTGGCGCTGCCGAGGGGACTGTCCGCGAGGATCCTGAGCCTGAGGATGAGGTTCCAGAC  
ACTAAACTGGAGTGGTGTGAGGTGAAAGAAGCTCAGGGAATGAAGAAATCACCTGGGCA  
AATGTTAGACGGACAGTATGG

>Chinese\_softshell\_turtle\_MRPS5

ATGAACCTGGCATGGACTGTAGAGACGCGCTGTACATTTCCGCTCCATGTAGTGTGGCA  
ATACAACAATGCAGGCAAAGCAGTTTTTTCAACAAATTGACAGCTGATGAGCTGTGGAAA  
GGAGTTTTGGCAGAGTCTGGTGTGGAGCAAGGAAGGGAAGAGGAAAGCGAACCAAGAAA  
AAGTTTAAAGGGATCTCAATAGAGGCCAGATCATTGGTGAAGGACGTTCTGGTTTCCTT  
TGGCCTGGCCTCAATGCGCCTCTGCTGAAAAGTGGAGCAGTCCAGACAATAAGTCAGCGC  
GACAAAGAGGAGCAGGAGAAGGTACAGTCTGAAATTATCCGGAAGAGGGATGAGTGGGAG  
AAGAGAAGAAAAACAAAGGTGAAGAGAGAGAGAGGCTGGACTGGAAATTCTTGGGGAGGC  
ATCAGTCTGGGACCACCTGACCCAGTCCCAATGGAGAACTTACGAAGACTTCGACTCC  
CGGGTAATTGAGGTGAAAAATGTATTTAATATGACAGCAAAGGAAGGGAGAAAAAATCT  
GTTAGTGTCTAGTGGCTGTTGAAATGGAAATGGAGCAGCAGGTTTTGCACTGGGGAAA  
GCAAGTGACAGGATGACAGCTTTAAGAAAAGCAAAGAACAGAGCAATTCATTTTACAC  
TATGTAGAGCGATACAAAATCACACAATTTATCATGATATTACAGCGACTTTTAAAAAA  
ACAACCATCCGGATGAAAAAGCAAACAAAGGCTATGGTCTTCATTGCCATCGAGCCATC  
ATTACCATCTGCAAGCTAATTGGGATTACAGACATGTATGCCAAGCTTTCTGGATCCAAC  
AATTTACTTAACCTCACCCGAGCTCTTTAAGGGACTAGCACGCCAGGAGACCCACCAG

GAGCTGGCAGAGAAGAGGAGCCTCTACGTGGTCTGAATTCCGGGAGGAATGTGGCCCCCTG  
CCCATCGTCGTTGCTGCTCCAAGTGGCGCCGTCAGGAAGGAACCGGAGCCTGTGGAAGAG  
GTTCCCGACATCAAGCTGGAGTGGAGCGAAGTGAGAGCTGCCAGGAATGAAGCGTTCT  
CCCTGGGCACATGTCCGAAGGACCGTGTGG

>Cod\_MRPS5

atgatgatgatggcgggtggcgggtggcgtgtgttccagggagggcgggcttctgtggcct  
gggctgaacccccggtgttccgggcccggagcgcgcagggcctctccagacggggggac  
gcagagcagctagagatgcaggcagaactagtgcgttccagagatgagtgaggagaagagg  
aggaggatgaaggtgaagagaggaagaggatggaccggaactcctgggggggcatcagt  
ctggggggccccggaccctgggccaatgggg

>Cow\_MRPS5

ATGGCGGCGGCGGTACGCGCTGCGGGCTTCTCCCTGCTCTGTGTGGCGCTTCGGCGGGT  
CGTTTATGGTCCAGGCAGCTTTACCTAAACACCTTTCCAACAGCTTCCATTTGGGCGTTG  
AAAGCTGTTCCAGCAATGGCCCTTCGTATCTGCAGGAGCCAGAGGCCGCTGCCGTTCT  
ACCCACTTGGGCCCCGCGCTGCAGACACAGTGTGCACTCCTGCTCCCGGGAACGTGACG  
GCCAGCAGTACAGATCCTATAGTTTCTCACTAAACTGACAGCAGATGAGCTATGGAAA  
GGTGTCTTAGCAGAAACCGGAGCTGGAGCAAGAAAAGGAAGAGGCCAAAAGAACCAAGAGA  
AAAAGAAGGAAGGATTTGAACAGGGGTGAGATCATCGGCAAGGGCGTCGTGGCTTCTTA  
TGGCCTGGTCTGAATGCCCCACTTATGAAAAGTGGAGCTATACAGACCATCACTCAAAGA  
AGCAAGGAAGAGCAAGAAAAGGTGGAGGCCGATATGGTCCAACAGAGAGAAGAGTGGGAC  
CGGAAGAGGAAGATGAAGGTTAAACGGGAGCGAGGATGGAGCGGAAACTCGTGGGGCGGC  
ATCAGTCTTGCCCCCTGACCCCGGTCCAATGGAGAAACGTATGATGATTTGATAACC  
AGGATACTTGAGGTGAGAAATGTTTTCAACATGACGGCCAAAGAGGGGAAGGAAGAGATCC  
GTCCGTGTCCTGGTCGCTGTGGGGAACGGCAGAGGAGCCGAGTTTTGCCATTGGGAAA  
GCCACTGAACGGGCAGATGCTTTCAGAAAAGCAAAGAATAGAGCCGTTCACTATTTGCAT  
TATATAGAACGATATGAAGACCATACCATATACCAGATATTTCTTAACATTTAAAAGG  
ACACATATCAAGATGAAGAAACAACCCAGAGGCTATGGCCTCCGCTGCCACCGAGCCATC  
ACCACCATCTGCCGGCTCATCGGCATCAAGACATGTATGCCAAGGTCTCTGGCTCCGTC  
AACATGCTCAGCCTACCCGGGGCCTCTTCCAGGGGCTCTCTCGCCAGGAAACCCACCAA  
CAGCTGGCTGATAAGAAGAGTCTCATGTTGTGGAATTCGGGAGGAATGTGGCCCTCTG  
CCCATCGTGGTTGCCTACCACAGGGGGCCTTGAGGAAGGATCCGGAGCCAGAAGATGAA  
GTTCCGGATATCAAATTGGACTGGGACGATGTCAAGGCTGTGCAGGGAATGAAGCGCTCT  
GTGTGGTCAGGTTTAAAGAGAGCTGCCACG

>Dog\_MRPS5

ATGGCGGCGGCGGTGCGCGCTGCGGGCCGCTCCCTGCGCTGTGCGGCGTGCCGGCGGGT  
CACATATGGTCCAGGCAGCTTTACCTAAACACCTATCCAACAGCTTCCGTTTTGGCATTG  
AAGACTGTTCTCAACAATGGCCCTTTGTCATATCCAGGAACCAGAAACAACCATCATTTT  
ATCAGCTTGACCCGTGCACTACAGACACAATGCTGTATTTCTTCTTCCAGTAATTTGATG  
GGTCAACAGTACAGATCCTATAGTTTCTCACTAAATTGACGGCAGATGAGCTTTGAAAA  
GGCGCTTTAGCAGAGACTGGAGCAGGAGCAAGAAAAGGAAGAGGCCAAAAGATCTAAGAAA  
AAGAGAAAAAAGGATTTGAATAGGGGTGAGATCATTGGTGAAGGACGTCATGGCTTCTTA  
TGGCCTGGTCTGAATGTCCCTTTATGAAAGAGGGAGCTATGCAGACCATTGCTCAAAGA  
AGCAAGGAAGAGCAGGAAAAGGTGGAGGCTGATATGATCCAGCAGAGGGAAGAGTGGGAC  
CGGAAGAGGAAGATGAAGATTAACGGGAGCGAGGATGGAGTGGAAACACATGGGGAGGC



GTCAGTCTTGGCCCCCTGACCCTGGTCCCAGTGGAGAAACATATGATGATTTTGATAACC  
AGGATACTTGAGGTAAGAAATGTATTCAATATGACAGCAAAAGAGGGAAGAAAGAAATCA  
GTCCGTGTCCTGGTTGCTGTGGGGAATGGTAGAGGAGCTGCAGGTTTTGCCGTTGGGAAA  
GCCACTGACCGGATGGATGCTTTCAGAAAAGCAAAGAACAGAGCAGTTCACTATTTGCAT  
TATATAGAACGATACGAAGACCATAACAATATTCCACGATATTTCTTTAAGATTTAAAAGG  
ACGCATATCAAGATGAAGAAACAACCCAGAGGCTACGGCCTCCGCTGCCATCGGGCCATC  
ATCACCATCTGCCGGCTCATTGGCATCAAAGACATGTATGCCAAGGTTTCTGGGTCTGTC  
AACATGCTCAACCTCACACGGGGCCTCTTCATGGGCTCTCCACCAGGAAACCCATCAA  
CAACTGGCTGATAAGAAGAGTCTACATGTCGTAGAATTCCGGGAAGAATGTGGCCCTCTG  
CCCATCGTGGTTGCCTCCCCCAGGGAGCCTTGAGAAAGGACCCAGAGCTAGAGGATGAG  
GTTCCAGACATCAAACCTGACTGGGAAGAAGTGAGGGCTGCGCAGGGAATGAAGCGCTCA  
GTGTGGTCAAATTTGAAGAGAGCTGCCACC

>Dolphin\_MRPS5

ATGGCGGCGACGGTGC GCGCTGCGGGAATTCTCCCTGTGCTGTGTGGCGCGCCGGCGGGT  
CATCTATGGTCCAGGCAGCTTTACCTAACAGCTTTCCAGCAGCTTCCATTTTGGCATTG  
AAGACTGTTCCAGCAATGGCTGTTTGTCTATCTCCAGGAACCCAGAGACAACCGTCATTTT  
ATCAGCTTGACCGTGC GCTACAGACACAGTGCTGTATTTCTTCTCCAGTAACTTGATG  
GGCCAACAGTATAGATTCTATAGTTTCTTACTAAATTGACAGCAGATGAGCTGTGAAAA  
GGTGCCTTAGCAGAGTCTGGTGCCGGAACAAGAAAAGGAAGAGGCAAAAGAACTAAGAAA  
AAGAAAAGAAAAGATTTGAACAGGGGTGAGATCATCGGTGAAGGGCGTTATGGCTTCTA  
TGGCCTGGTCTGAATGCCCTCTTATGAGAAATGGAGCTGTGCAGACCATTGCCAAAGA  
AGCAAGGAAGAGCAGGAGAAGGTAGAGGCGGATATGGTCCGGCAGAGAGAAGAGTGGGAC  
TGGAAGAGGAAGATGAAGGTTAAACGGGAGCGAGGATGGAGCGGAAACACATGGGGAGGC  
GTCAGTCTTGGCCCCCTGACCCTGGTCCCAACGGAGAAACATATGATGATTTGATAACC  
AGAATACTTGAGGTGAGGAATGTTTTCAACATGACAGCAAAAGAGGGAAGAAAGAGATCA  
GTCCGTGTCCTGGTGC GCTGTGGGGAATGGCAGAGGAGCTGCAGGTTTTGCCATTGGGAAA  
GCCAGTGAACGGGCAGATGCTTTCAGAAAAGCAAAGAACAAGGCAGTTCACTATTTGCAT  
TATATAGAACGATATGAAGACCATAACAATATACCATGATATTTCTTTAAGATTTAAAAGG  
ACGCATATCAAGATGAAGAAACAACCCAGAGGTTATGGCCTCCGCTGCCACCGGGCCATC  
ATCACCATCTGCCGGCTCATTGGCATCAAAGACATGTATGCCAAGGTCTCTGGTCCGTC  
AACATGCTTAACCTCACCCGGGGCCTCTTCACGGGCTGTCCCGCCAGGAAACCCATCAA  
CAGCTGGCTGATAAGAAGAGTCTCCATGTTGTGGAATTCCGGGAGGAATGTGGCCCTCTG  
CCCATCGTGGTTGCCTCCCCAAGGGGGCCTTGAGAAAGGATCCGGAGCCGGAAGATGAG  
GTTCCAAACATCAAACCTGGACTGGGAAGATGTGAAGGCTGCCAGGGTATGAAGCGCTCT  
GTGTGGTCAAGTTTAAAGAGAGGGCGCCACC

>Duck\_MRPS5

ATGCCTGGCTTTCAGCTTGAGAAATTGTTCTTCACATCAACGTTTTGCCAAGGGTTTGCT  
TCTGTGCCAGTGAAAGGGAGTTGCTGTTCTATTCCAGCCTGGCATGGGCTCTCCAGGTG  
CAATGTTCCATCTCTGCCCCCGGAATGTCATGGTACAGCAATGCAGACAAAGCAGTTTC  
TTCAATATGTTGACAGCTGATGAGCTCTGAAAAGGAGCTTTGGCAGAGACTGGTGTGGGA  
GTAAAGAAAGCAAGAGGGAAGAGAAGGAAGAAGAAGCTAAGAAAGAATCTCAATAGAGGC  
CAGGAGATCGGAGAAGGACGTTCTGGTTTCTCTGTCCTGCTTAATGCTCCTATAATA  
CAAAGTGGGATGGTACAGACAGTTTCCCAACGAAAAAAGAAGAACGAGAGAGAATTCAG  
TCTGAAATTTCTCAGCAGAGACACATGGGAGAAGAGAAGAAAATAAAAGTTAAGAGA

GAGGGAGGATGGAGTGGAAAGTGTGGGGAGGTGTCATTCTGGATCCTCCTGACCCAGGT  
CCTAACGGAGAACTTACGAAGATTTTGAAACAAGAGTCATTGAGGTGAAAAATGTGTTT  
TGTATGAAGGCAAAGGAAGGCAGAAAAAATCAATACGTGCCTTAGTGGCTATTGGAAT  
GGTAAAGGGGCTGCAGGTTTTGCATTGGGGAAAGCAGGTGACAGAATGAATGCTTTACGA  
AAAGCAAAGAACAAGCAATACGCAGCTTACATTATATAGAGCAGTATCAGAACCACACA  
ATTTACCATGACATTACTGTGAAATTTAAAGAACAACCATCCGCATGAAGAAGCAAAC  
AAAGGTTATGGTCTTATTGCCACCGAGCTATTATCACCATCTGCAAATAATTGGCATT  
AAAGACATGTATGCTAAGGTTACTGGATCCAAAACTTGATTAACATTACCAGAGCTCTC  
TTCAAAGGACTGACACAACAGGAACTCACCAACAGTTAGCAAACGAGAAGAACCTCTAT  
GTTGTGGAGTTCGGGAGGAGCAGGGCCACTGCCCATCGTTGTAGCACTGCCTGAGGGG  
ACCGTCCGTGAGGATCCTGAGCCGAAGATGATGTTCCAGACACTAAGTTGGAGTGGAGC  
GAGGTGAAAGAAGCTCAGGGAATGAAGAAATCACCTGGACAAATGTCAGGCAGAGAGTA  
TGG

>Elephant\_MRPS5

ATGCAGCATCGCTTGACCACGGAACTCACTTTGCAGCAGACGAAGTGTGGCAGTGAGCTC  
ACGCTTGTGGAATTAAGTCTTACCACATTCCCCATCATCCTGAAAGAGGATTTTAC  
TGCACTTCGTCCCTTCCGTGCTCGTGTACCTTGCACTTCGGTGAGAAGCGCCTGCCT  
GGCCCCGCTCCAGCCAGGCCCGCCACGCCCGCCCCAGCCAGGCCCGGCCACG  
CCCGGCCCGAGCCCCGAAGCCCCGTCTCATCCCGCCCCAGCCAGGCCCGGCCAC  
GCCCGGCCACCACGCCCGCCGCTGTGTGACCTTGCGCGCTCCTCGCCCTCTTGCCCG  
GGAAGCCTGGCTGCAGGCGAGGCCTCTGGACGGCGTCCGCGGCCGCTCGTGTGCTCCG  
GGAGGAGCGGGCGGCCGGCGGGCGGCCCTCGTCGGCTTCCCGGGCAGCGTGCCCCGCG  
GCTCCCGCCGCATGTGGGGCCGTGGGGGGTCCGGGGGCGAGCCCGCCGTCA  
GGAGCCGCGTGAGGAAGGGGTGCCGGCTCGTGTGCTCGTGTGGCCGCCCTTCCCCTC  
CCGCCCCGCTCCCGCCTTCGCGGCCGGCAGCTCGGTCTCCCCGCGGCCAGGCCTTGC  
CTCCGGAAACCGCTGACAGCAGAGGAGCTCTGAAAGGAGTTTTAGCAGAGACTGGTGCT  
GGAGCAAGAAAGGAAGAGGCAAAAGAACCAAGAAAAAGAGAAGAAAGGATTTGAACAGG  
GGTCAGATCATTGGTGAAGGGCGTTCTGGTTTCTCTGGCCTGGTCTGAACGTTCCCTT  
ATGAGAAATGGAGTTGTGCAGACCATTGCCAAAGAAGCAAGGAAGAGCAGAAGAAGGTA  
GAGCCAACATGGTCCGGCGGAGAGAAGAGCAGGAACAGAAGAAGAAAATTAAGGTTAA  
CAGGAGCGAGGATGGAGCGGAAACACGTGGGGAGGTGTCAGTCTTGGCCCTCCTGACCT  
GGTCCCAATGGAGAAACATACGAGGATTTTGATACCAGAGTACTTGAGGTAAAAACGTT  
TTCAATATGACAGCAAAAGAGGGAAGAAAGAAATCGGCCCGTGTCTGGTAGCTGTGGGG  
AATGGCAGAGGTGCTGCAGTTTTGCGGTTGCGAAAGCTGCTGAACGGACGGACGCTTTC  
AGAAAAGCCAAGAACAAGCAGTTAACGTTTTGCATTACATAGAACGCTATGAAGACCAC  
ACAATCTCCATGATGTTTCTTTAACGTTTAGAAAGACGCATATCAGGATGAAGAGACAA  
CACAGAGTTACGGCCTCCGCTGCCACCGGCCATCATTACCCTGTGCCGGCTCGTTGGC  
ATCAAAGACATGTATGCAAAGGTGTCGGGACCCGTCATATGCTCAGCCTCACCCGGGCC  
TTCTCCATGGACTGTCCCACCAGGAGACTCACCAGCAGCTGGCTGACAGGAAGAGGCTG  
CATGTGGTGAATTCGGGAGGAGTGTGGCCCTCTGCCATCGTGGTTGCCTCCCCCAG  
AGCACCTTGAGAAAGAATCCAGAGCCAGAAGAGGAGTTCTAATATCAGACTGGACTGG  
AACGATGTGAAGACCATGCAGGGAATAAAGCGCTCTGTGTGGTCAGGTTGAAGAGAGGC  
GCCACC

>Fruitfly\_MRPS5

ATGAGTCAAACATTGATCCGTCGTCTCTTCAATCAAGCTTGTAGCAGAAATATTTTTATT  
TTGAACCAAAGCTTGTTATCTTACATGAACCCATTTTACCAGGTTACATTGGTTTACGT  
AATACCAGCTCTTTAACAAATTACCTGCTGAAGACATTTGGCGCGGAGTAACTGCGGTT  
AGCAATGCTGGAAAAAAGAGGCCGTGGGAAAGGAAGTGGAAAAAAGTTGCAAAGGAT  
CTTAACAAAGGGCAATCTATCGGATTCGGAAAATGCGGTTCGCATATGGCCTGGATTGAAT  
TCACCTCTTATACGAGGAAACGAGTTAATTAATCAGCAGAACTCAATGAGAATTTAGAT  
AGAGAAAATGGTATTTTAAAATTACGCGATTCAATGGGAAGTTTTAAATTGATGAAACTA  
AATCCAATAGACCGAGGTTGGTCTGGAAGTAAAATGCCCGGCCGAAGCATTGGACCTCCT  
GATCCTGTTGGCGACGAAGAGTTTGTGTCATTTGATACTAGAGTTTTAGAAAACAAAATT  
GTTTTTATTATGAAAGGAAATATGGGAAGAAAACGAAGATATTCCGTTCTTTCAGTCCG  
GGAAATGGTAATGGTTTGGCAGGATTCGCTACCGCTAAAGCGCCAGAAGTTCGTACGGCC  
CTTCGAAAATCAAAGAACCGAGCAGGACAAAACTAATCAATATAAGCCTTTGTGAAAAT  
AGAACAATTTTTCATGACTTTCGTACAGATTTTCGGAAAAACAAAATTTTTGTTTTTTCAG  
AAACCTGATGGATACGGCTTAGTCTGTCACCGGGCAATTCAGACAATTTGTAAAGTTATA  
GGTATCAAGGATTTATATGCCAAAATTGAGGGTCTACGAATATCCAGAATATTGCAAAG  
GCATTTTTTATTGGTCTGATGACGCAAAGGTCTATCAGTATATTGCTAACGAAACAAAT  
TCAAACATTGTTCAACTGCAAAAGACAAGAAATAGATTCATTGATGTAAAAGGAATGCCT  
TTTTCTAATTCAACTCTAACGCAGAACACCCAAGAAATTGACTATATGCATTTACATTA  
GGAAATCAAATAGTTTTACAGCGAAAAGGCACAGTACCATTTTATGTTTATAGCAAAGGA  
CATGACTTGCATCAATTTAAAAGGAGCGATTTTCGGAACCAAGTTAATGTTTCGGCTACAC  
AAGCTAGTTAATGCTTATGAT

>Fugu\_MRPS5

ATGGCGGCGTCCATACGGGTGTGCTTTACCCTCCGCTTTGTACTTCGAGGTGCATCTTCA  
CTCCATACCCTTGCAGGGCCAGTTCAGTTGTCCCAGTTTGGGTGTGGAGCCTTCCAAAGA  
AACCCACACTTCCATTGTTACCAGTGGCAGCAGGCCAACAGGCTAGACATAGCAGCTTC  
TTCAACAAATTGACAGCAGAAGAATTATGGAGAGGCGTTTTGGCAGAACTGGTGCCGGA  
AGCAAAAAGGGCCGAGGAAAAAGAACAAAACGCAATTGAAAAAGGATCTGAACCGTGA  
CAGAGGATTGGAGAAGGTCTGAGGATTCTCTGGCCTGGTTTGAATGCTCCTGTTCTG  
AAGGCTGGGGTTGTTGGGAGCATTGGGCGCAGGAGCGAGTCGGAGCAGCAGGATATAAAA  
GCTGAACAAGTGCGGCAAAGGGAGGAATGGGAAAAGAGGAGGAAGACGAAGGTGAAGAGG  
GAAAGAGTTGGACCGTCACTCATGGGGGGGCATCAGCCTTGACCCCTGATCCTGGG  
CCTAATGGAGAGACTTATGAAGACTTTGATACTCGTGTTCATTGAGGTGAAGAATGTGTT  
AACATGACAGCCAAGGAAGGTTCGGAAGAGGTCCACCAGCTGTCTGGTTGCTGTTGGAAAC  
GGCAACGGAGCTGCAGGCTTTGCGCTGGCTAAAGCAGCAGACAGAAACACGGCTCTGAGA  
AAGGCTAAAAACCGAGCGATCCACTATTTATATTACATAGAGCGACACAACGACCACACC  
ATTTATCACGACATTGAGTCCAAGTTCAAGAGGACAACACTTCGCATGAAGAAGCAAAAC  
GAAGTTACGGTCTGCACTGCCACCGAGCTGTCACTCTGTGTAAGCTGATCGGCATC  
AAGGATATGTAAGTGAATAGAAAGGATCTGCAATCTCCTCAATATCACCAGGGCTCTC  
TTCCTGGGCTGGCAATCAGGAAACCCACCAGAAGTTGGCTGACAAGAAGCAGCTCCAC  
GTGGTTCGAGTTTACAGGATCACCAAGGCCCGCTGCCTCAGGTGGTGGCGAGCCCCAAAAT  
GGCGCGCAGCTGACGCGGAGCCCGAGGATGAGATCCCCAACACACGACTGCACTGGGAC  
GACGTACGAGCGTCACAGGGACTCAAACGCTCCATCTGGGCGGGCGTCAAGCGCACCATC  
TGG

>Anole\_lizard\_MRPS5

ATGGCGGCCCGCTAGCCGCTCTGGTGCAGAAAGTCTGCAGTTCGGGCGTCTTGAGGGCG  
GCGCGGAGTGGCTATACCCTGATTTTCATGGAATGGAACCAAGTGTCAATATACTACCTTG  
GCATGTGCTTACAGACACTTTTCTATATTTCTACACCTTGTAAACATCGCAATACAGCCC  
TGCAGGCAAAGCAGCTTTTTCAACAAATTGACAGCTGATGAACTCTGGAAAGGAGTTTTG  
GCAGAGAGTGGCGCAGGGGAAGGAAAGGAAGAGGGAAGAGGACCAAGAAAAAGCTAAAG  
AAGGATCTCAACAGAGGCCAGGTCATTGGGGAAGGACGTTTCAGGTTTCCTTTGGCCTGGC  
CTCAATGCTCCAGTGTGAAACAAGGAACAATGCAGGCAGTTAGCCAGCGCAATAAAGAA  
GAGCAGGAGAAGCTGCAGGCTGAGAGACTCCAGAAGCGAGACGAGTGGGAGAAGAGGAGA  
AAAACGAAGGTGAAGCGGGAGAGAGGCTGGACAGGAAGCTCATGGGGAGGAATCAGTTTG  
GGACCTCCTGATCCAGGTCCAATGGAGAAACATATGAAGATTTGACTCCAGAGTGATT  
GAGTTGAAAAGTGATTTAACATGACAGCCAAGGAAGGAAGAAAAAGATCTGTTAGTGCT  
CTGGTGGTTGTTGGGAATGGAAAAGGGGCTGCTGGTTTTGCACTTGAAAAGCCTCTGAC  
AGGATGGTGGCACTAAGAAAAGCAAAGAACAGAGCAGTTCATTATTTGCACTATATTGAA  
AGATACGAAGATCATAAATTTATCATGACATTGCAACCTCATTTAAGAAAACAATATT  
CGGATGAAGAAGCAAAACAAGGATATGGCCTTCACTGTCACCGAGCTATTATTACCATC  
TGCAAGCTGATCGGAATTAAGACATGTACGCTAAGGTTTATGGATCCGGGAATTTACTG  
AATCTCACCCGAGGACTTTCAGGGGATTAGCAACTCAGGAAACTCACAAAATCTAGCA  
AATAAGAAGGGCCTCTATGTCGTAGAATATCGCGATGAGTGTGGCCCACTGCCCATCATT  
GTGGCAAAGCCTGATGGGGAGGTGAGACAAGATCCCGAACCTCTGGATGAAGTTCCTGAT  
GTCAAATTAGAATGGGATGAAGTGAAGCAGCCCAAGGAATGAAGAAAAGTATCTGGGCC  
AATGTCAGAAGAACAGTTTGG

>Horse\_MRPS5

ATGGCGGCTGTGGTGCAGCTGCTGCGGGCTGCCTGCCTGCGGTGTGCTGCGCGCCAGCG  
GGTCATTTATGGTCTAGGCAGCTTTACCTAAACACCTTTCCAACAGCTTCCGTTTGGGCA  
TTGACATCTGTTCTCAGCAATGGCCGTTTGTCTCTCTTGGACCCAGAGACAACCGTCAT  
TTCACCAGCTTGACCCGTGCACTGCAGACACAATGCTGTATTTCTTCTTGCACTAAGTTG  
ATGGGCCAACAGTATAGATCCTATAGTTTCTTCACTAAATTGACAGCAGATGAGCTGTGG  
AAAGGTGCTTTAGCAGAGACTGGTGTGGAGCAAGGAAAGGAAGAGGCAAGAGAACAAG  
AAAAAGAGAAGGAAGGATTTGAACCGGGTCAAATCATTGGTGAAGGGCGTCAAGGCTTC  
CTATGGCCTGGTCTGAATGTCCCTTCTGAGAAATGGAGCTGTGCAGACCATTGCCCAA  
AGAAGCAAGGAAGAGCAGGAGAAGGTGGAGGCTGAGATGGTCCAGCAGAGAGAGGAGTGG  
GACCGGAAGAGGAAGATGAAGGTTAAACGGGAGCGAGGATGGAGCGGAAACACGTGGGGA  
GGTGTCACTCTCGGCGCCCCAGACCCTGGTCCCTATGGAGAAACATATGACGACTTTGAT  
ACCAGGATACTTGAGGTGAGAAATGTCTTCAATATGACGGCAAAGAGGGAAGAAAGAAA  
TCAATCCGCGTCTGGTGCCTGTGGGGAACGGCAGAGGAGCTGCAGGTTTTGCCATTGGG  
AAAGCCACTGAAAGGGCGGACGCTTTCAGAAAAGCAAAGAACAAGCAGTTCACTATCTG  
CATTATATAGAACGATACGAAGACCATAACAATATCCACGATATTTCTTTGACATTTAAA  
AGGACGCATATCAAGATGAAGAAACAACCCAGAGGCTACGGCCTCCGCTGCCACCGGGCC  
ATCATCACCATCTGCCGGCTCATTGGCATCAAAGACATGTACGCCAAGGTCTCGGGATCC  
ATGAACATGCTCAACCTCACCCGGGGCCTTCCGTGGACTCTCCCGCCAGGAAACCCAC  
CAACAGCTGGCTGATAAGAAGAGCCTCCACGTGGTGAATTCGGGAGGAATGCGGCCCT  
CTGCCATCGTGGTGCCTCCCCCAGGGGCCCTTGAGAAAGGATCCGGAGCCAGAAGAT  
GAGGTTCCAGACGTGCACTGGACTGGGAAGAAGTGAAGGCCGCACAGGGAATGAAGCGC  
TCAGCGTGGTTGGGTTTAAAGAGAGCCGCCACC

>Human\_MRPS5

ATGGCGACCGCGGTGCGCGCTGTGGGCTGCCTCCCCGTGCTGTGTAGCGGGACGGCAGGT  
CATTATTGGGGAGGCAGTGTCCCTAACACCTTACCAGCAGCTTCCATTTTGGCATGG  
AAGAGTGTCTCGGCAATGGCCATTTGTCATCACTGGGAACCAGAGACACCCATCCCTAC  
GCCAGCTTGAGCCGTGCACTGCAGACACAATGCTGTATTTCTCTCCAGTCACCTGATG  
AGCCAGCAGTATAGACCATATAGTTTCTTCACTAAATTGACTGCAGATGAGCTGTGGAAA  
GGCGCTTTAGCAGAGACTGGTGTGGAGCAAAAAAAGGAAGAGGCAAAGAAGAACTAAAAAG  
AAGAAAAGAAAGGATCTGAACAGGGGTGAGATCATTGGTGAAGGGCGTTATGGTTTTCTA  
TGGCCCGACTGAATGTCCCTTTATGAAAAATGGAGCAGTGCAGACCATTGCCAAAGA  
AGCAAGGAAGAGCAGGAGAAGGTGGAGGCAGACATGATCCAGCAGAGAGAAGAGTGGGAC  
CGAAAAGAAGATGAAGGTTAAACGGGAGCGAGGATGGAGTGGAACTCATGGGGAGGC  
ATCAGTCTTGGCCCCCTGACCCTGGTCCCTGTGGAGAAACATATGAGGATTTTGATACC  
AGGATACTTGAGGTAAGAAACGTTTTCACTATGACTGCGAAAGAGGGAAGAAAGAAATCG  
ATCCGTGTCTTGGTGGCTGTGGGAAACGGAAAAGGAGCTGCAGGTTTTTCTATTGGGAAA  
GCTACTGATCGGATGGATGCTTTCAGGAAAGCAAAGAACAGAGCAGTTCACCATTGTCAT  
TATATAGAACGATATGAAGACCATAAATTTCCATGATATTTCATTAAAGATTTAAAAGG  
ACGCATATCAAGATGAAGAAACAACCCAAAGGTTACGGCCTCCGCTGCCACAGGGCCATC  
ATCACCATCTGCCGGCTCATTGGCATCAAAGACATGTATGCCAAGGTCTCTGGGTCCATT  
AATATGCTCAGCCTCACCCAGGGCCTCTCCGTGGGCTCTCCAGACAGGAAACCCATCAA  
CAGCTGGCTGATAAGAAGGGCCTCCATGTTGTGGAAATCCGGGAGGAATGTGGCCCTCTG  
CCCATTGTGGTTGCGTCCCCCGGGGCCCTTGAGGAAGGATCCAGAGCCAGAAGATGAG  
GTTCCAGACGTCAAACCTGACTGGGAAGATGTGAAGACTGCACAGGGAATGAAGCGCTCT  
GTGTGGTCTAATTTGAAGAGAGCCGCCACG

>Macaque\_MRPS5

ATGGCGACCGCGGCGCGTGTGGGCGGCTGCCCGCGCTGTGTAGCGGGACGGCAGGT  
CATTATTGGGGAGGCAGCGTTCCTAAGCACCTTACCAGCAGCTTCCATTTTGGCGTGG  
AAGAGTGTCTGAGCAATGGCTGTTTGTATCACTGGGAACCAGAGACACCCATCCCTAC  
GCCAGCTTGAGCCACGCGTGCAGACACAATGCTGTGTTTCTCTCCAGTCACCTGATG  
GGCCAGCAGTATAGACCATATAGTTTCTTCACTAAATTGACTGCAGATGAGCTGTGGAAA  
GGCGCTTTAGCGGAGAGTGGTGC CGGATCAAGAAAAGGAAGAGGCAAAGAAGAACTAAAAAG  
AGGAAAAGAAAGGATCTGAACAGGGGTGAGATCATTGGTGAAGGGCATTACGGTTTTCTG  
TGGCCTGGTCTGAATGTCCCTTTATGAAAAATGGAGCAGTGCAGACCATCGCCAAAGA  
AGCAAGGAAGAGCAGAAGAAGATGGAGGCCGACATGATCCAGCAGAGAGAAGAGTGGTAC  
CGAAAGAGGAAGATAAAGGTTAAACACGAGCGAGGATGGACTGGAAACTCTGGGGAGGC  
GTCAGTCTTGGCCCCCTGGCCCTGGCCCAATGGAGAAACATACGAGGATTTTGATACC  
AGGGTACTTGAGGTAAGAAATGTTTTCAATATGACAGCGAAAGAGGGAAGAAAGAAATCG  
GTCCGTGTCTGGTGGCTGTGGGGAACGGAAAAGGAGCTGCAGGTTTTGCTATTGGGAAA  
GCCACTGATCGGATGGACGCTTTCAGGAAAGCAAAGAACAGAGCACTTTACTGTTTGCAT  
TATATAGAACGATATGAAGACCATAAATTTCCATGATATTTCATTAAAGATTTAAAAGG  
ACGCGTATCAGGATGAAGAAACAACCCAAAGGTTATGGCCTCCGCTGCCACAGAGCCATC  
ATCACCATCTGCCGGCTCATTGGCATCAAAGACATGTACGCCAAGGTCTCTGGGTCTGTT  
AATATGATCAACCTCACCCGGGGCCTCTTCTATGGGCTCTCCAGACAGGTAACC

>Medaka\_MRPS5

ATGGCGGCGTCCGTAAGGGTGTGCAGTGCCCTCCGTATCACAATCGGAGGTGTCGCCTCA

ATCCGCTCTCAGGCTGCGGTGGGCGCTGTTCACTTCTCCAATTTGGTGTGTAGAGCCTCA  
TCATCCTCTTTTTCCCAACGACAGTCTTCGATTCCACTCAACCCACCAACATGGCAGCAG  
ACCAGACATGGCAGCTTCTTTAAACAAGTTGACGGCAGAGGAGCTGTGGAGAGGGCGTTCTG  
GCAGAGTCCGGAGCCGGGGCCAGGAAGGGCAGAGGGAAGCGGACAAAACGGAAATTAAGG  
AGAGACCTGAATCGAGGACAGATCATTGGAGAAGGTCGTGGGGGGTTTCTGTGGCCCCGC  
CTGAATGCTCCGGTGTGAAGGACGGTTCTCTGCAGAGCATGAGCAGAAGAGGCGAGACT  
GAACAGCAGGAGTCCAAGCTGAACTGGTGCCTCAAAGGGATGAGTGGGAAAAGAAGAGG  
AAGATGAAGGTGAAGAGGGAGAGAGGGTGGACCGGAACTCTGGGGGGGCACCAAGTTTG  
GGTCCCCCTGATCCTGGACCTAATGGAGAAACCTACGAAGACTTTGATTCACGGGTATT  
GAGGTGAAGAGTGTTTTTAACATGACGGCTAAAGAAGGCAGAAAAGGTCCATCAGCTGT  
TTGGTCGCCGTTGGAAACGGCAATGGAGCTGCAGGTTTTGCGCTGGGCAAAGCAGCAGAT  
AGAAACACAGCTCTGAGGAAGGCTAAGAACCGTGCCATCCACTACCTGTACTATATAGAG  
CGATAACAACACACAATTTATCATGACATTGAGTCCAAGTTCAAGAGGACCACGCTC  
CGCATGAAGAAACAAAACGAGGGTTACGGTCTGCACTGCCACAGAGCTGCATCACCCCTC  
TGCAAGCTGATCGGCATCAAGGATTTGACTGCAAAGTAGAAGGATCGGTCAACCTCCTC  
AACATCACAGGGCTCTGTTCACTGGATTAGCCAGCAGGAACTCATCAGGTGCTGGCT  
GACAAGAAGAAGTCCATGTGGTGGAGTTTCAAGTCAAATCAAGGCCGCTGCCATTGTG  
GTGGCGAGCCCCAAAGATGAGGTTGCTCCACCCCGAGTGTGAGGATGAAATCCCCAAC  
ACCAAGCTGCACTGGGGCGATGTCCGCGTAGCGCAGGGGATTAACGCTCGGTCTGGACC  
GGCGTCAAGCGCACAGTCTGG

>Mouse\_MRP5

ATGGCGGCGCCGTACGCGCTGCAGGCTGTCTCCCTGCATTGTGTAGCTTGCAGGCAGGT  
CATTTCTGTCTAGGCAACTCTCTTTAAACGCCTTTCCAGTAGCAGCCACTTCTTTTTG  
GCAGTGAAGACAGCTCTTAGCCACGGCTCATTGTCTATCCAGGGAAACAAGGCGCAACCAC  
TGTCTGACCAGCTTGAGCCATGTGCTACAGACACAGTGTGCGTTTCTCTCCCGGAAC  
TGGACGGGCCAGCAGTGCCGGCCCTACAGCTTCTTACCAAAGTACTGCAGAAGAGCTC  
TGGAAAGGCGCATTAGCAGAGACTGGAGCTGGAGCAAGAAAAGGCAGAGGCAAAGAACA  
AAGAAAAAGAGAGGAAGGATTTGAACAGGGGCCAGATCATTGGTGAAGGGCGCTCTGGC  
TTCCTGTGGCCTGGTTTGAACGTTCTCTGATAAAAAGTGGGGTCGTCCAGAACATCGGC  
CAGAGAAGCAAAGAGGAGCAGCAGAAGGTGGAGGCCACCATGGTCGAGCAGCGAGAGGAG  
TGGGACCGGAAGAGGAAGATCAAAGTTAAAAGGGAGCGCGGCTGGAGTGGGAACACGTGG  
GGGGTGTGAGTATTGGCCCCCAGACCCGGGACCCAATGGAGAAACATATGAAGACTTT  
GATACCAGGATCTTGAGGTAAGAAATGTCTTCAATATGACAGCAAAGAGGGAAGAAAG  
AAGTCGGTCCGAGTCTGGTTGCTGTGGGAATGGAAATGGAGCTGCAGGTTTTGCTATT  
GGGAAAGCTGCTGACCGGGGAGACGCTTTCAGAAAGGCAAAGAACCAGCGATTCAATAT  
TTGCATTACATAGAACGATACGAAGGACATACAATATTCCATGACATTTCCCTAAGATTC  
AAAAGGACACAGATCCGGATGAAGAAACAACCCAGAGGTTACGGCCTCCGCTGCCACAGG  
GCCATTATCACCATCTGCCGCTCATCGGCATCAAGGACATGTATGCGAGGGTCACCGGG  
TCCATGAACATGCTCAACCTCACCCGGGGCCTTCCATGGGCTTGGCCGCCAGGAAACC  
CACCAACATCTGGCGGATAAGAAGGGTCTCCACGTGGTGGAAATCCGGGAGGAATGTGGG  
CCTCTGCCTATCGTGGTGGCCTCCCCACATGGGGCCTTGAGTAAGGAGCCGGAGCCGGAA  
CCTGAGGTTCTGATACCAAGCTGGACTGGCAGGACGTGAAGGCCATGCAGGGACTGAAG  
CGCTCTGTGTGGTTAATTTAAAGAGGCCTGCCACC

>Naked\_mole\_rat\_MRP5

ATGGCGGTTTCCGTGCGCGCTGTTGCTGCCTGCCTGCTCTGTGCGGAGTCCCGGCGGGC  
CATTCTGGTCCAGGCAGCTTTCTGTAAGTGCCTTTCCAACAATTCTGTTTTGGCATT  
AAGGCTACGACTCTCAGCAATGGCACTTTGTCACCACGGGGCTCCAGGAATGACCATCAT  
TTCACCAGCTTGAGCTGCGCGCTGCAGACACAGTGTGTGTTTCTTCCAGAACTG  
ATGGGCCAGCAGTGTAGACCCTATAGTTTCTTACTAAATTGACGGCAGATGAGCTGTGG  
AAAGGCGCTTTAGCAGAGACTGGTGCTGGAGCAAGAAAAGGAAGAGGCAAAGAATAAG  
AAAAAGAGAAGAAAAGATTGAAACAGGGGTGAGATTATTGGTGAAGGGCATTCTGGTTTC  
CTGTGGCCTGGCCTGAATGCCCTCTCATGAAAAATGGGGATGTGCAGACGATTGCCCAA  
AGGAGAAAAGGAGGAGCAGGAGAAAGGTGGAGGCTGACATGCTCCAGCAGCGGGAAGAGTGG  
GACCGGAAGAGGAAGATTAAGTGAAGCGGGAGCGTGGGTGGAGCGGCCACACATGGGGC  
GGCGTCAGCCTTGGGCCCTGACCCTGGGCCAATGGAGAACTATGAGGATTTTGAT  
ACCAGGATACTAGAGGTAAGAAATGTTTTCAATATGACAGCAAAGACGGAAGGAAGAAA  
TCGATCCGCGTCTGGTCTGTTGGGGAAATGGGAAAGGAGTCGCAGGTTTTGCCATTGGG  
AAAGCCACTGAACGGGTAGACGCTTTCAGGAAAGCAAAGAACAGAGCAGTTCATATTTG  
CATTACATAGAACGATATGAAGACCATAACAATTTCCATGACATTTCATTAAAGATTTAAA  
AGGACACATATCAAGATGAAGAAAACAACCCAGAGGTTATGGCCTCTGCTGCCACCGAGCC  
ATCATCACCATCTGCCGGCTCATTGGCATCAAGGACATGTATGCCAAGGTCTCCGGGTCC  
ATCAACATGCTCAACCTCACCAAGGCCTTCCAGGGCCTTGCCCGCCAGGAAACCCAT  
CAACACCTGGCTGATAAGAAGGGGCTGCATGTGGTGAATTCGGGAGGAATGTGGCCCT  
CTGCCATCGTGGTGCCTCCCCCAGGGGGCCTTGAGGAAGGACCCGGAGCCAGAAGAT  
GAGGTTCCAGACATCAAAGTGGACTGGCAGGAGGTGAAGGCTGCACAGGGCATGAAGCGC  
TCGGTGTGGTCAGGTCTGAAGCGAGCCGCCACC

>Opossum\_MRP5

ATGGCGGCTGCTGTGGCTTTGCGGGCCGGCACCCGTCTTCCCATATCTTGGGCTGCTGGG  
CCAGGGTATTTATGGACAAGGCAGTTTTACCCAACACTACATTACCTGTGATTTCCAGTTTT  
TCTTCGAGGGTCTCCCCTTGAATGGTAGTTTTGCATTCCAGGGAGCCAGGAGTCATCAT  
TTTATCAACTTGGCCCATGCCCTCCAGACTCAATGTTGTATTACTTCTCCTGGCACATTG  
ATAGGACAACAGAGACACTATAGTTTCTTACTAAATTGACGGCAGAAGAGCTATGGAAA  
GGGGTCTTAGCTGAGTCTGGTGTGGAGCCAGGAAAGGAAGAGGGAAAAGGAGCAAGAAA  
AAGAGGAAAAAGGACCTCAACAGGGGCCAGATTATTGGTGAAGGACGTTCTGGTTTCCTC  
TGGCCTGTTTTGAATGCCCTGTTTTAAACAGGGCATGATTCAGCCAGTTGGCCAAAGA  
GGCAAAGAAGAACAGGAAAAGATGCAGACTGAAATTCTCCAACAGAGAGATGAATGGGAG  
AAAAAGAGAAAAAGGAAGATTAACGGGAGAGAGGTTGGACTGGAAGTTCTTGGGGGGGA  
ATCAGTTTAGGACCCAGATCCTGGTCCTAATGGAGAACTTATGAAGATTTTGATACC  
AGAATAATTGAGGTAAGAAGTGTTCATATGACGGCCAAAGAAGGAAGAAAGAAATCT  
GTTTCGGGTTCTGGTGGCAGTTGGAATGGAAAAGGAGCTGCAGGTTTTGCCGTGGGAAAA  
GCCCTGACCGGATCAATGCATTTAGAAAAGCAAAGAATAAAGCGATTAATTATTTGCAT  
TACATAGAAAGATGAAGACCATACAATTTACCATGATATTTCTTAAACATTTAAGAAA  
ACACATATCAAGATGAAGAAGCAGCCAGAGGTCATGGTCTCATTGTCATCGAGCCATT  
ATTACAATTTGCAAATTAATTGGAATTAAGATATGTATGCAAAGGTTACTGGGTGATGT  
AATTTAATTAATAACAGAGGACTCTTTCATGGATTATCAAACAGGAACTCATCAG  
CAGTTGGCAGATAAGAAAAGCCTTCATGTCGTTGAGTTCCGAGATGAATGTGGTCCCCTG  
CCCATAGTGGTGCCTCTCCTCAAGGAGCAATTAGAAAAGAGCCTGAGCCCGAAGATGAG  
GTTCCAGATACCAAATTAGACTGGGATGAAGTTAGGATGAGTCAGGGAATGAAAAAATCA

GTTTGGGCAAACCTGAAGAGAGCAGCAGCC

>Orangutan\_MRPS5

ATGGCGACCCGCGGTGCGCGCTGTGGGCTGCCTCCCCGTGCTGTGTAGCGGGACGGCAGGT  
CATTATTGAGGAGGCAGCATTCCCTAACACCTTACCAGCAGCTTCCATTTTGGCATGG  
AAGAGTGTCTCAGCAATGGTCATTTGTCATCACTGGGAACCAGAGATACCCATCCCTAC  
GCCAGCTTGAGCCGTGCACTGCAGACACAATGCTGTATTTCTTCTCCAGTCACCTGATG  
AGCCAGCAGTATAGACCATATAGTTTCTTCACTAAATTGACTGCAGATGAGCTGTGGAAA  
GGCGCTTTAGCAGAGACTGGTGTGGAGCAAAAAAAGGAAGAGGCAAAGAATAAAAAAG  
AAGAAAAGAAAGGATCTGAACAGGGGTGAGATCATTGGTGAAGGGCGTTATGGTTTTCTA  
TGGCCTGGGCTGAATGTCCCTGTTATGAAAATGGAACAGTGCAGACCATTGCCCAAAGA  
AGCAAGGAAGAGCAGGAGAAGGTGGAGGCAGACGTTATCCAGCAGAGAGAAGAGTGGGAA  
CGAAAGAAGAAGATGAAGGTTAAACGGGAACGAGGATGGAGTGGAACTCATGGGGAGGC  
CTCAGTCTTGGCCCCCTGACCCTGGTCCCAGTGGAGAAACATATGAGGATTTTGATACC  
AGGATACTTGAGGTAAGAAATGTTTTCACTATGACTGCGAAAGAGGGAAGAAGGAAATCG  
ATCCGTGTCCTGGTGGCTGTGGGGAACGAAAAGGAGCTGCAGGTTTTGCTATTGGGAAA  
GCCACTGATCGGATGGATGCTTTCAGGAAAAGCAAAGAACAGAGCAGTTCACCATTTGTAT  
TATATAGAACGATATGAAGACCATACAATATCCATGATATTTCAATTAAGATTTAAAAGG  
ACGCATATCAAGATGAAGAAACAACCCAAAGGTTACGGCCTCCGCTGCCACAGGGCCATC  
ATCACCATCTGCCGGCTCATTGGCATCAAAGACATGTATGCCAAGGTCTCTGGGTCCACT  
AATATGCTCAGCCTCACCCAGGGCCTCTCCATGGGCTCTCCAGACAGGAAACCCATCAA  
CAGCTGGCTGATAAGAAGGGCCTCCATGTTGTGGAAATCCGAGAGGAATGTGGCCCTCTG  
CCCATTGTGTTGCCTCCCCCGGGGGCCTTGAGGAAGGATCCAGAGCCAGATGAGGTT  
CCAGACATCAAACCTGGACTGGGAAGACGTGAAGACTGCACAGGGAATGAAGCGCTGTGTG  
TGGTCTAATTTAAAGAGAGCCGCCAGC

>Western\_painted\_turtle\_MRPS5

ATGTGGACAGCTGATGGCATCGACCTTGAGAAAGCAACTCAGTTCTCAGGCTGTCTCTCG  
TTACCAGCGAATAGGAGTGGCTGTGCTATACGAACCTGGCATGGGCTCTACAGACTCAT  
TGTTACATTTCTGCTCCATGTAGCGTGACAATAACAATGCAGGCAAGGCAGCTTTTTTC  
AACAAATTGACAGCTGATGAGCTGTGGAAAGGGTTTTGGCAGAGACCGGTGCTGGAGCA  
AGGAAGGGAAGAGGAAAGCGAACCAAGAAAAAGATTAGGAGGGATCTCAATAGAGGCCAG  
GTCATTGGTGAAGGACGTTCTGGTTTCTTTGGCCTGGTCTCAATACTCCTATAATGAAA  
AGTGGGGTAGTCCAGACAATTGGTCAACGAGACAAAGAGGAGCAGGAGAAGGTGCAGTCT  
GAAATTATCCGGAAGAGGGATGAGTGGGAGAAGAGAAGAAAAACAAGGTGAAGAGAGAG  
AGAGGCTGGACTGGAAATTCCTGGGGAGGCATCAGTCTGGGACCCCTGAGCCAGGTCCT  
AATGGAGAACTTATGAAGACTTTGACTCCAGGGTAATTGAGGTGAAACATGTATTTAAT  
ATGACAGCAAAGGAAGGCAGAAGAAGATCAGTTAGTGCCTAGTGGTTGTTGGAAATGGA  
AATGGGGCTGCAGTTTTGCAAGTGGGGAAAGCAAGTGACAGGATGACAGCTTTAAGAAAA  
GCAAAGAACAGAGCAATTCATTTACTATGTAGAGCGATATCAGAACTACACAATT  
TACCATGATATTACAACAACCTTTAAAAGAACAACCATCCGGATGAAAAAGCAAACAAA  
GGGCATGGTCTTCATTGCCATCGAGCCATCATTACCATCTGCAAGCTGATTGGGATTACA  
GACCTGTATGCCAACTTTCTGGATCCAACAATCTACTTAACCTACCAGAGCTCTCTTT  
AAGGGTTTAGCAAAGCAGGAAACCCATCAAGAGCTAGCAGATAAGAAAAGCCTCTACGTG  
GTAGAATTCGTGAGGAGTGTGGCCCCCTGCCGACCGTAGTTGCTTACCTAATGGAGAT  
GTCAGGAAGGAACAGAGCCTATAGATGAGGTTCCAATACCAAGCTGGAATGGAGCGAA





CTGCCTGAGGGACCTATTTCGCAAGGATCCTGAGCCTGAAGATGAGGTTCCAGACACAAAG  
TTGGAGTGGAGTGAGGTGAAAGAAGCTCAGGGAATGAAGAAATCTCCCTGGGTGAATGTC  
AGACGGACAATATGG

>Pig\_MRP5

ATGGCGGCGGCGGTGCGCGCCGCGGGTTCTTCCCCGGGCTGTTTGGCGCGTCGGCAGGT  
AATTTATGGTCCAGGCAGCTTTACTTAAACACCTTTCCAGCGGCTTCCATTTTGACATCG  
AAGACTTTTCCAGCAATGGCCCTTTGTACCTCCAGGAACCAGAGACAACCATCATTTT  
ACCAGCTTGGCTTGTGCACTTCAGACACAATGCAGTATTTCTTCTCCAGTAACTGGATG  
GGCCAACAGTACAGATCCTATAGTTTCTCACTAAATTGACAGCAGATGAGCTATGGAAA  
GGTGTCTTAGCAGAGAGTGGTGTGGAGCAAGAAAAGGAAGAGGCAAAAGAACTAAGAAA  
AAGAGAAGAAAGGATTTGAACAGGGGTGAGATCATTGGTGAAGGACGTCATGGCTTCCTC  
TGGCCTGGTCTGAATATCCCTCTTATGAGAAATGGTGTGTACAGACCATTGCCAGAGG  
AGCAAGGAAGACCAGGAAAAGGTGGAGGCCGATATGGTCCAGCAGAGAGAAGAGTGGGAC  
CGGAGGAGGAAGATGAAGGTTAAACGGGAGCGAGGATGGAGTGGAAACACATGGGGAGGC  
GTCAGTCTTGGTCCCCGGATCCTGGTCCCAATGGAGAAACATATGATGATTTTGATACC  
AGGATACTTGAGGTGAGAAATGTTTTCAATATGACAGCAAAAGAGGGAAGAAAGAGATCA  
GTCCGTGTCTGGTGTGCTGTGGGGAATGGCAAAGGAGCTGCAGGTTTTGCCATTGGGAAA  
GCCACTGAACGGGCAGATGCTTTCAGAAAAGCAAAGAACAGAGCAGTTCACTATCTGCAT  
TACATAGAGCGATATGAAGACCATAACAATATACCATGATATTTCTTTAAAATTTAAAAGG  
ACGCATATCAAGATGAAGAAACAACCCAGAGGCTACGGTCTCCACTGCCACCGGGCCATC  
ATGACCATCTGCCGGCTCATTGGCATCAAAGACTTGTACGCCAAGGTGTCTGGCTCTGTC  
AACATGCTCAACCTCACCCGGGCCTCTTCTTGGGCTCTCCCGCCAGGAAACCCATCAA  
CAACTGGCTGATAAGAAGAGTCTCCATGTTGTGGAATTCGGGAGGAATGTGGCCCTCTG  
CCCATCGTGGTTGCCTCCCCCAGGGAGCCTTGAGAAAGGATCCAGAGCCAGAAGATGAG  
GTTCCAGACATCACACTGGACTGGGAAGATGTGAAGGCCGCTCAGGGAATGAAGCGCTCT  
GTGTGGTCCGGTTTTAAAGAGAGCCGCCACC

>Platypus\_MRP5

ATGACAGCGAAAGAGGGAAGAAAGAAATCCATCCGTGTCCTAGTGGTTGCCGGGAATGGA  
CAAGGAGCAGCGGGTTTTGCTGTGGGAAAGCCAGCGACCGGATGAGCGCTTTTAGAAAA  
GCCAAGAATAAAGCAATTCACTACTTGCCTACATAGAAAGATAACCAAGACCATAACAATC  
TACCAGGATATTTCACTAACTTTCAAAGGACAACAATCAAGATGAAGAAACAACCCCGC  
GGCTATGGTCTGCGTTGCCACCGGGCCATCATCACAATCTGCAGGCTCATCGGAATCCGG  
GACATGTATGCCAAGGTCACCGGGTCCGTTCAACTTACTGAACCTCACCAGAGGAGTCTTT  
AAGGGCTTATCCAGCCAGGAGACGCACCAGCAACTGGCCGACAAGAAAGGCCTCCACGTG  
GTGGAGTTCCGGGAGGAGTCTGGCCCCCTGCCCTGCTCGTCGCCTCCCCACTAGGGGTG  
CTCAGCAAGGAGCCCCGAGCCCCGAGGACCAGATTCTGACACCAAGCTGGACTGGAGCGAT  
GTCAAGGCCAGCCAAGGCTTCAAACGCTCCATCTGGTCCAATTTGAAGAGGCCGGCATCC

>Rabbit\_MRP5

ATGGCGGCGGCGGTGCTAGCCGCGCGCTGCGTCCCTGGACTGTGTGGGGTGCAGGCGGGT  
CTTCTGTGGTCCAGGCAGCTTTCCCTAAACACCTTTCCAGCAGCTTCTGTTTTGGCGTGG  
AAGACTGCTCTCAGCAATGGCCCGGTGTCGTGCGGGGAAGCAGAGACAGCCGTGGAGAC  
GCCAGCCTGAGCCACGCGCTGCAGACACAGTGTGGATTTCTTCTCCAGTGCCTGGACG  
GGCCAGCAGCACAGAGCCTACAGCTTCTCACCAAATTGACAGCAGACGAGCTATGGAAA

GGTGCTTTAGCAGAGACTGGCGCTGGAGCAAGAAAAGGAAGAGGCAAAGAACAAGAGA  
AAGAGAAGAAAGGATTGAACAGGGGTCAGATCATTGGTGAAGGACGTTCTGGTTTCCTG  
TGGCCTGGTCTGAATGTGCCCTTATGAAAAATGGAGCAGTGCAGACCATTACCCAGAGA  
AGCAAGGAAGAGCAGGCCAAGGTGGAGGCCGACATGATCCAGCAGAGAGAAGAGTGGGAC  
CGGAAGAGGAAGACGAAGGTTAAACGGGAGCGAGGATGGAGCGCAACACGTGGGGAGGC  
GTCAGTCTTGGGCCCTGACCCTGGTCCCAACGGAGAAACGTATGAAGATTTTGATAACC  
CGGGTACTGGAGGTAAGGAACGTTTTTAATATGACGGCAAAGGAAGGAAGGAGGAAGTCC  
GTCCGGGTGCTGGTGCCTGTGGGGAATGGAAAGGGGGCTGCAGGTTTTGCTGTTGGGAAA  
GCCACTGAACGAATAGATGCTTTCAGAAAAGCTAAAAACAAGCAATTCACTATTTGCAT  
TACATAGAACGATATGAAGACCATAACAATATTCCATGACATTTCTTTAAGATTTAAAAGG  
ACACATATCAGGATGAAGAAACAACCCAGAGGGTACGGCCTCCGCTGCCACAGGGCCATC  
ATCACCATCTGCCGGCTCATTGGCATTAAAGACATGTACGCCAAGGTCTCCGGGTCCGTC  
AACATGCTCAACCTCACCCGGGGCCTCTCCAGGGGCTCTCCGCCAGGAAACCCATCAA  
CAGCTGGCTGATAAGAAGGGTCTGCACGTTGTGGAGTCCGGAAGAATGTGGCCCTCTG  
CCCATTGTGGTGCCTCCCCACAGGGGGCCTTGAGAAAGGATCCAGAGCCCGAGGATGAG  
GTTCCAGACATCAAAGTGGACTGGCAAGAAGTGAAGGCCGCACAGGGACTGAAGCGCTCT  
GTGTGGGCGAATTTAAAGCGAGCTGCCACC

>Tetraodon\_MRPS5

ATGAAAGTGAAGAGAGAAAGAGGCTGGACCGTCACTCGTGGGGCGGCATCAGCCTGGGC  
CCCCCTGATCCTGGGCCAAATGGAGAGACATACGAGGACTTTGATTCACGTATCATTGAG  
GTGAAGAGTGTGTTCAACATGACAGCCAAGGAAGGTGCAAGAGGTCCATCAGCTGTCTG  
GTCGCTGTTGGGAACGGCAACGGAGCCGAGGCTTTGCTCTGGGTAAAGCAGCAGACAGA  
AACACAGCTCTGAGGAAGGCTAAAAACAGAGCCATCCATTATTTGTATTACATAGAGCGA  
TACAACGACCACACC

>Tilapia\_MRPS5

ATGGCGGCATCCATCGGGGTGTGCTGTGCCCTCCGCATCACACTTGGAGGTGCAACATCC  
CTCCGTGCTGTAGGAGGAGTTGTACAGGCATCTCTTTGGCAAGTCGAGCCTCAGCTGCG  
TCTCTGCAAAGACACTCTGCTCTTTCACCGCTCCCTCCAACAACATGGCAGCAAACAAGA  
CACGGCAGCTTCTTCAACAAGTTAACGGCTGAAGAGCTATGGAGAGGTGTGTTGGCTGAG  
TCCGGTGTGGAGCAAGGAAGGGTCGAGGGAAGCGTACCAAACGAACTAAGGAGAGAT  
CTGAACCGAGGACAGACCATTGGAGAGGGTCGTGGCGTTTTCTGTGGCCTGGACTCAAC  
AGTCCAGTGTGAAGGATGGCGCTTTCAGAGCATGAGTCGAAGAGGCGAAGCTGAGCAG  
CAGGAGGTTCAAGCTGAAGTAGTGCCTCAGAGGGACGAGTGGGAGAGAAGGAGGAAGATG  
AAGGTGAAGAGGGAGAGAGGTTGGACAGGAACTCCTGGGGGGGAATCAGCCTGGGTCTCT  
CCTGACCCTGGACCAATGGAGAAACCTACGGGGATTTGATTACGTGTCATCGAGGTG  
AAGAGTGTGTTCAACATGACAGCCAAAGAAGGCAGAAAGAGGTCCATCAGCTGTTGGTC  
GCAGTGGGAAATGGCAACGGAGCCGAGGCTTTGCTTTGGGGAAAGCAGCAGACAGGAAC  
ACGGCTCTGAGGAAGGCCAAGAACAGAGCCATCCACTACTTGTACTATATAGAACGATAC  
AATGACCACACCATTACCATGACATTGATTCCAAGTTTAAGAGGACGACACTCCGCATG  
AAAAAACAAAACAAGGTCACGGTCTGCACTGCCACAGGGCGGTTCATCACTTTTGCAAG  
CTGATCGGCATAAAAGACATGTATTGCAAAGTAGAGGGATCAGTCAATCTCCTGAACATC  
ACCCGGGCCCTCTTACCGGATTAGCCAGTCAGGAAACCCACCAGACTCTGGCTGACAAG  
AAGCAACTCCATGTCGTAGAGTTTGTAGTCGAGCGTGGCCTTCTGCCCATGGTGGTGGCG  
AGTCCTAAAGACGGCGCACGACCCAACCCAGAGTCAGAGGATGAGATTCCAACACCCGG

CTGCACTGGGATGACGTACGAGCTGCACAGGGGTTGAAACGCTCGATCTGGGCAGGTGTC  
AAACGCACCATCTGG

>Turkey\_MRPS5

ATGGAGTGGAAAAGCTTTCCTATTTTCAGCGACAGCTGAAGAGCTATGGAAAGGAGCTTTG  
GCGGAGACTGGTGTGGGAGTAAAGAAAGGAAGAGGAAAGAGAAGGAAGAAAAAGCTGAGA  
AAGAATCTCAACAGAGGCCAGGAGATTGGAGAAGGACGTTCCGGTTTCCTCTGGCCAGGT  
CTTAATGCTCCTCTGATACAAAGTGGGAAAGTACAGGCACTTAGTCAACGGAAAAAGAA  
GAACGAGACAGAATTCAGTCTGAGATTATTCAGCAGAGAGATACATGGGAGAAGAAAAAGA  
AAAATAAAAATGAAGAGAGAGGGAGGATGGAGTGGAAAGTGTGGGGAGGTGTCCTCATG  
GATCCTCCTGATCCAGGTCCTAATGGAGAACTTACGAGGATTTTGAACAAGAGTCATT  
GAGGTGAAAAATGTGTTTTGTATGAAGGCGAAGGAAGGCAGAAAAAATCAATACGTGCT  
TTAGTGGCTATTGGAAATGGTAAAGGGGCTGCAGGTTTTGCACTGGGGAAAGCAGGTGAC  
AGGATGACTGCTTTACGGAAAGCAAAGAACAAGCAATACGCAGCTTGCAATTTATAGAG  
CTGTATCAGAACCACACAATTTATCATGACATTACAGTAAAATTTAAATGCACAAACATC  
CGCATGAAGAAGCAAAAACAAGGGTATGGTCTTCATTGCCACCGAGCTATTATTACCATC  
TGCAAATAATTGGCATTAAAGACATGTATGCCAAGGTTACTGGATCTAAAACTTGATT  
AATATTACCAGAGCTCTCTTTAAAGGATTGACACAACAGGAGACTCACCAGCAGTTAGCA  
AACCAGAAAAACCTCTACGTGGTGGAGTCCGGGAGGAGCAAGGCCCACTGCCCATCGTC  
GTGGCACTGCCCCAGGGGACTGTCCGTGAGGATCCTGAGCCTGAGGATGAGGTTCCAGAC  
ACTAAACTGGAGTGGTGTGAGGTGAAAGAAGCTCAGGGAATGAAGAAATCACCTGGGCG  
AATGTTAGGCGGACAGTATGG

>Worm\_MRPS5

ATGGCATCACTTTTGCCATTTGTCCAGACCCGTAGCAATACGGTGAACCTCTTTATGAGA  
AGATCTGGTCCAGAACTGTGAAAACATTAACCTCCGTTTCAAATCTGGTCCAGAAGAAA  
GGACGTCGTAACACAAGACAACCAGTTAGACCTCTCAATCGATTTTATCGAATTGGATCC  
AGTCCAATGAAAATCGAATTTGCTGGCCTGAATGCTCCAATCAGAATGAGAGAGACAGAA  
AATCAAAATTTGATGTCAATTGCTGAACAGACGGAAGATGAAATTCGAGATTCAATGGGT  
GGAACCAAGAAAATTCTCGAAGAACGAGATACTGGAAAAAGAAGCGCAACCGTGAAAAA  
CTGCATCCGATGGAGCGTGGATTCTCTGGAACACAACCTGTCCGACAGAACTTGGTGCA  
CCACCACCACTCGATGGTGTGAATTTGATGATTTTGAACTTATTGTTTAGAGGTTAAG  
CGTACTTCTAACATGACAAATGTATTTGGAAGAGTTCACACAATGTCAGCACTAGTTGTT  
ACTGGAATGGACGAGGACTTGTGGATATGCTGTTGGAAAAGCACCAATTCATCGTACC  
ACTACAGCTATCATTAATGGAATGGGAATGGCATCCAGAAAAGCTATTCCACGTTGAACTT  
CATGAAGGACGTACGATTTATCAGGACTTTTATGCTGAATGCCGTAACACTCGAGTATTT  
GCACAACGTCGCCACGTGGATTCGGTCTTACATGCCATCCCAGACTGATCAAAATTTGT  
GAGGCTATCGGTATCAAGGATATTTACGTGAAAGTTGAAGGATCCACGAAAAACTATTTG  
GCATTGACTCATGATTTGTCACTGGACTCCTCAACCAAGAGACTCATCAACAACCTGGCC  
GAACGAAAAGGTCTTCATGTCGTTGAAATGTCCCATCTCGTCATTTCTTACCCCAAAT  
GTGGCGTCACCGATTTCCACTGAACTCAAGACCGAGGAACTTTAGAAGCACTTGATCGC  
CTGAATCTTGATGACTTCTATGGTGAAGGACGGTATCCATTAAGAAAGCCGAAATCTCTT  
CCATTTCTTTCCAACCTCGAAGGTCATTTGGATGCCAGATGGAGGAAACATCCTTTTCAGA  
AATCAGGAATCGACTATGATTGCGCTGATTGCCGATAACATGGTTCCACGTTGGACTCGT  
GATGCTCGTGTGCGTGGGCGGATCAAAGAAATGAACGAATGACAACGGGTGTCGAACCA  
ATGCCACTCGGTATCGGACTCTCGCATGTGGTTCCAAAAAGGATGAC

>Yeast\_MRP5

ATGTTCAAGAGGCAATTATCGACTAGTGTTTCGTTATCTACAGCATTATGATGAGTCGCTA  
TTATCAAGGTACTATCCTGAAAGTCTTTTAAAATCCATAAAAATTGCTCAACAAACGATA  
CCAGAAGATACTAAATTCAGAGTATCTCGTAACGTGGAATTCGCACCACCATATTTGGAT  
GATTTTACCAAATAACATCCTTTTTGGGATTACAAACCAGGCATGCCCCATCTCCACGCT  
CAAGAGGAGAATAATAACTTCAGCATCTTTAGATGGGACCAGGTACAACAACCATTACCA  
GGCGAAGGTAACATTCTGCCTCCAGGAGTCAGCTTACCAAACGATGGTGGTCGGAAATCG  
AAAAGCGCCGATGTAGCTGCAGGGCTACACAAGCAAACCGGTGTAGATCCGGATTATATC  
ACTAGAAAAGTTGACTATGAAGCCGCTGGTGATGAAAAGAGTGTCAAATCAGACTGGGAAG  
GGTAAAATTGCGTCTTTCTATGCCTTGTTGTCGTTGGTGACAAAACGGTATGGTAGGT  
TTGGGAGAAGGTAAATCTCGTGAAGAAATGTCCAAAGCGATCTTTAAAGCTCATTGGGAT  
GCGGTAAGGAACCTGAAGGAAATACCTAGGTATGAAAACAGAACTATTTATGGTGATATA  
GATTTTAGGTATCATGGTGTGAAACTACATTTAAGAAGTGCAAAAACCAGGGTTTGATTA  
CGTGTAACCATGTAATCTTTGAGATTTGTAATGTGCAGGTATCAAAGATCTGAGTGGG  
AAAGTATATAAATCCAGAAACGATATGAATATAGCTAAAGGTACCATCGAGGCTTTCACG  
AAAGCTCAAAGACATTGGATGAGGTTGCCCTGGGTAGAGGCAAAAAGCTTGTGTATGTC  
AGGAAAGTTTACTATTCAAGC

>Zebra\_finch\_MRP5

ATGGCGGGCGCTGGGGCCTGCCGGGGGCTTCCCTCAGCTGTGCCCGCCTGCCTGCCGGC  
TTTGCTTCTGTGCCAGTGAAAGGGAGCTGCAGTCCCTACTCCAGCCTGGCATGGGCTTTC  
CAGACACAGTGCTCCCTCTGCCCCCTGGACTGGGACAGTGAGCAGTGACAGGAAAAGC  
AGTTTCTCAATACCTTGACAGCTGATCAGCTATGGAAAGGAGCTTTGGCAGAGACTGGT  
GTAGGAGTAAAGAAAGGAAAGAGGAAAGAAAAGAAGAAGCTAAGGAAGAATCTCAAT  
AGAGGCCAGGAGATTGGTGAAGGACGTTCTGGTTTCTCTGGCCTGGTCTTAATGCTCT  
GTGTTGCAAACTGGGAGAGTGCAAGAAGTTGCCAGCGGAAAAAAGAAGAACGAGAGAGA  
ATTCAGTCTGAAATCATTGAGCAGAGAGATACATTTGAGAAGAAAAGAAAATAAAAATT  
AAGAGAGAGGGAGGATGG

>Zebrafish\_MRP5

ATGGCGGGCGGTCACAAGGCTGTGCTGTGCCTACGGTTGTCATTTGAAGGTGTTGGAGCA  
CTGCGAACTCTAGGGGGCGCTGTTTACTTCTCACACTTGGCAAGACCCAGTCTACTCAT  
TATGCTCCAGTCACTGTGGCCCTACAGCAGATCAGACATGGAAGCTTCTTCAACAAATTG  
ACAGCTGATGAGCTCTGGCGAGGTGTCTCAGCTGAGACTGGAGCTGGTGCCAGAAAAGGA  
AGAGGAAAGAGAGCCAAACGAAAAGTGAAGAAAGATCTCAACAAAGGCCAGAGTCTTGGA  
GAAGGTCGTGCTGGATACCTGTGGCCCGGTCTAAACTCCAATATTTAAGGATGGCTCC  
ATTCAGAAACCCATGCAGCGTGGAGAGGCAGAGCAGAAGGAGATGACAGCAGCCCTGGAA  
CGCCAGAGAGATGAATGGGAAAAGCGCAGAAAGGCCAAGATAAAGAAGGAAAGGGGATGG  
ACTGGAGGCTCCTGGGGTGGGGTCAACCTGGGCCGTTGGATCCCGGGCCCAATGGAGAA  
ACCTATGAAGATTTTGATTGCGGTGTTATTGAGCTCAAGAGTGTGTTTACTGTTACACC  
AAAGAGAGCAGGAAGAGATCCATCAGTGCTTTGGTGGCAGTGGGCAATGGAAATGGAGTC  
GCAGGGTTTGCAGTGGGGAAAGCAGCAGACCGGACCGCCGCTCTCAGAAAAGCAAAGAAC  
AGAGCCATGAATTATCTGACTACATCGAGAGATACAATGACTATACAATATATCATGAC  
ATTGAGTCCAAGTATAAAAAGACCACACTTCAATGAAGAAACAAAACAAAGGTTATGGT  
CTGCGCTGTATCGGGCTGTGATCACTCTGCAAGCTGATTGGGATAAAGGATATGTAT  
GCAAAAAGTAGATGGCTCGGTAAACCTCCTTAACATCACCAGGGCTCTTTTCAAGGCCTG

GCCAGTCAGGAGACTCATCAGACTCTAGCTGATAAAAAGCAGCTGAATGTGGTTGAGTTC  
AGGGCTGAACAGGGCCCTCTGCCATCGTGGTGGCACGACCGCACCTCGGCGCCCGTCAG  
GATCCTGAAGGGGAGGATGAAGTGCCCAACACGCGTCTGCACTGGGCTGATGTGAAGGCC  
TTGCAGGGTGTAAAGAAATCCATATGGGCAGGGGTTAAGAGGACAATCTCT

>Great\_tit\_MRPS5

ATGGCGGCGGCGGTGGTGGCGGCCGGCGGGCGTGTGCCCGGGCGGCGCTGCGAGCGGCC  
TGGAGAGGGTTTGTCTGTGCCAGTAAAAGGGAGCTGCAGTTCCTACTCCAGCCTGGCA  
TGGGCATTCCAGACACGGTGCTCCCTCTGCCCCCTGGACTGGGAGACTCGAGCAGTGC  
AGGAAGAGCAGTTTCTTCAATACAGTGAAGTGTGATCAGCTATGGAAAGGAGCTTTGGCA  
GAGACTGGCGTGGGAGTAAAGAAAGGAAGAGGAAAGAAAAGAAAGAAAAGCTAAGGAAG  
AATCTGAATAGAGGCCAGGAGATTGGTGAAGGACGTTCTGGTTTCTCTGGCCTGGTCTT  
AATGCTCCTCTGTTGCAAAGTGGGAGAGTGCAGGAAGTTGCCCAACGAAAAAAGAAGAA  
CGGGAGAGAATTCAGACTGAAATTATTCAGCAGAGAGATACTTGGGAGAAGAAAAAGAAA  
ATAAAAATTAAGAGAGAGGGAGGATGGAGTGGAAAGTGTGGGGAGGTATCATTCTGGAT  
CCTCCTGACCCTGGTCTAATGGAGAACTTATGAAGATTTTGAAGCAAGAGTCATCGAG  
GTGAGAAATGTGTTTTGTATGAAGGCAAAGGAAGGCCGGAATAATCAGTACGTGCCTTA  
GTGGCTGTTGGGAATGGTAAAGGGGCTGCAGTTTTGCAATAGGGAAGGCAGGTGACAGG  
ACGAATGCTTTAAGGAAAGCAAAGAATAAAGCAATAAGCTCCTTACACTTCGTAGAGCTG  
TATCAGAACCACACAATTTACCACGACATTTCTGTGAAATTTAAAAGGACAAAAATCCGC  
ATGAAGAAACAAAACAAAGGGTATGGGCTGCATTGCCACCGAGCCATTATCACCATCTGC  
AGGCTAATTGGCATTAAAGGACATGTATGCCAAGGTCACTGGATCCAAAACTTGATTAAC  
ATCACCAGAGCTCTCTTAGAGGCTTGACCTTACAGGAGACTCACCAGCAGCTGGCAAAC  
AAGAAGAGCCTCTACGTGGTGGAGTTCCGGGAGGAGCAGGGCCCTCTGCCATCGTGGTG  
GCCCTGCCGAGGGGACTGTCCGTGAGGAGCCTGAGCCTGAGGATGAGGTTCCAAACACA  
AAGCTGGAGTGGAGGGAGGTGAAAGAAGCCAGGGAATGTTGAAATCTCCCTGGGCAAGC  
GTCAGACGGGCGGCGTGC

>African\_ostrich\_MRPS5

ATGTTGACAGCTGATGAGCTATGGAAGGAGCTTTGGCAGAGACTGGTGTGGGAGTAAAG  
AAAGGAAGAGGAAAGAGAAGGAAGAAGAAGCTAAGGAAGAATCTCAATAGAGGCCAGGAG  
ATCGGTGAAGGACGTTCCGGTTTCTCTGGCCTGGTCTTAATACTCCTTTAGTACAAAGT  
GGGAGAGTCCAGGCAGTTACCCAACGAAAAAAGAAAGAACGAGAGCGAATTCAGTCTGAA  
ATTGTTGAGCAGAGAGATACATGGGAGAAAAAAGGAAAATAAAAGTGAAGAGAGAGGGA  
GGTTGGAGTGGAAAGTGTGGGGAGGTGTCATTCTGGACCCCTGACCCAGGTCCAAAT  
GGAGAGACTTATGAAGATTTTGAACAAGAGTCATTGAGGTGAAAAATGTGTTTTGTATG  
AAAGCGAAGGAAGGCAGAAAAAATCAATTCGTGCCGTAGTTGCTATTGAAATGGAAAA  
GGGGCTGCAGGTTTTGCAGTGGGAAAAGCAGGTGACAGGATGAATGCTTTACGGAAAGCA  
AAGAACAAGCGATACGCTGTTTACATTTTATCGAGCTGTATCAAACCACACAATTTAC  
CATGACATTAGTGTGAAATTTAAAAGGACAAAAATCCGCATGAAGAAGCAAACAAAGGC  
TATGGCCTTCGTTGCCACCGAGCTATTATCACCATCTGCAAATAATTGGCATTAAAGAC  
ATGTACGCCAAGGTTTCTGGTTCCAAAACTTGATTAACATCACCAGAGCTCTTTAAA  
GGCTTAACAGAACAGGAGACTCACCAGCAATTAGCAAACCAGAAGAGCCTCTACGTTGTA  
GAGTTTCGGGAGGAGCAGGGCCCGCTGCCATTGTTGTGGCATCGCCGAGGGAGCCATC  
CGCGAAGATCCTGAGCCTGAAGATGAGGTTCCAGACACCAAGCTGGAGTGGAGTGAAGTG  
AAAGAAGCTCAAGGAATGAAGAAATCTCCCTGGGCAAATGTCAGACGGACAGCATGG

>common\_starling\_TP53

TTTGTTCCTGGGGCGGCTCCCCGAGCCCTCCCAGTGACTCCCAGTCCCTCCCAGTACTCT  
CCAGTGCTGAACAAGCTCTATTGCCGCTGGCCAAGCCGTGCCCGGTGCAGGTGCGGGTG  
GGGGTCCCGCCGCCCCCGGGCCCTGGTCCGGGCGGTGGCCGTCTACAAAAAATCCGAG  
CACGTGGCCGAGGTGGTCCGGAGGTGTCCCCACCACGAGCGCTGCGGGGGAGGGGCAGAC  
GTGGTTTTTAGTTTTTTTTTCCACCCAGGTGGGCTCAGAGTGCACCACGGTCTGTAC  
AACTTCATGTGCAACAGCTCCTGCATGGGGGGCATGAACCGCAGGCCCATCTCACCATC  
CTCACCTGGAGGGGCTGGG

>central\_bearded\_dragon\_TP53

ATGGAGCGTGATTTGGAGTCCGACCTGGACCGCACCTGAGTCCGCTGCTGAGCCAGGAG  
ACATTCAGGACCTGTGGGGTTCCTTGGAGGCGACAGACTCAACAGTTTTCTGGACCCG  
GGCAACATGCCAAGACCGATGGGCTTACGCGACCTGGGTTTTGTCTTTGTACGTGCAG  
GCGGAGAACATCCCGGAGGTGGGCGGAGACCGTGCTGACCTCCCCAGCCAGGTACCCCG  
GCCAGCGACCTCTCCGGATCCAGCAGCCCCGCGCCGCTCCCGCCGTCCCCTGCACC  
GAGGACTACGTCGGCGAGCACGGTTTTGAGCTGGCTTTCGAGACGTCCGGCATGGCGAAA  
TCCGTACGTGCACATACTACCAGATCTGAATAAGCTGTTCTGCCAATTGCTAAGACA  
TGCCCGGTCCATATAAAGTGTCCGGCCTCGCCGCCGCGACGCCGTATCCGCACCATG  
GCCGTGTACAAGAAGTCTGAGCACATTGCCGATGTGGTGAAGCGCTGCCCGCACCACGAG  
CGATCCCCGACTTCAAGGATGGTACAGCGCTGCTGAACATCTGATCCGAGTGGAAGCC  
AATCCGCAGGCTAAGTACATCTCGGACACCCGCGAGCAAGCGCCACAGCGTCACCGTTCCT  
TACGAGCAGCCTCAGCTGGGAACGGACAGCACCACCATTTGTACAACCTCATGTGCAAC  
AGCTCCTGCATGGGAGGCATGAACCGCGCCCCATTTGACCATCGTCACTTTGGAGACC  
CCTCTGGGTATGATTCTCGGACGCCGCTCCTTTGAAGTCCGGGTTTGCCTGCCCGGA  
CGGGACCGCCGACCGAAGAGGAAAACCTGAAGAAAACAACAAATCCAGAAGGGAATCC  
AAAAAGGCTGTTGCACAGAGCAGCAGTTCTGAAAGCACCAAGCGGTCTCCGCAGAAACG  
TCTGGCAATAACAACGAGAGCGGGCCGTACACCTCCAGGTTCCGCAACTGAAGCACTAC  
AAGATTTTGGAGTACCTGCTCAAAGCCATGGAGTCATTTGACTCGAAGCAGCAGCAGCAA  
CCGCCACAGCCGAGGGAGAATCGGAACAGCAGGGGGAGCCGGAGAGCCGGTCTAGTCTT  
CTGAAGGCCCGGAAACAAGACGGTGGTCAAAGTTCGTCCAGCGAAGGGCCGTCCAGGGTG  
AAGAAGCGAAAGGTGAAAGAGGAGACGCTGGATTCCGAC

>Gecko\_TP53

ATGGAGCAATCTGCAGATTCAGATGTGGACCCACTGCTGGTCACTGATTCGTTTTCGTGCG  
CATTGGAGCCAGATTAATGAAGATAGCTTGTGAGTTCAAACCTGCTGCTGGATTTCAAC  
TTAGACTTCCAGCTCCCTGAGGAAAATCCCAGCTGCCCTTTGCCAGGAAGGGGGCAGC  
AGAGGGCCCGGGGAAATCAGAGAGGATGGCCCCGCCCTGGATATGACGGCTTGACCCGCC  
CCCTCCACCGAAGACTACACCGGAACCAAGTGTACCAGCTGGCATTGATCAACTTTCC  
GAGACGCCCTTCGTACAGGAAGGGGGCAGCAGCGGGCCGGGGGAAGGCAGAGAGTGGGGC  
CCCCCCCCGTATAACGGTTTTGCACCACCTCCTCCACCGTCCCCTCCACCGAAGACTAC  
GCCGGGGGACACTGTTTCGAGCTGGTGTGTTGAGCAGTCGGGAACGGCCAAATCCGTACC  
TGCACATATTCAAAAACAATTGAACAAGCTGTTCTGTACAGCTCGGAAAGACTTGCCCCGTT  
CTGGTGAAGCTGTCTACCTGCCACCCCCGGCTCAGTCATCCGGGCCACGGCCGTCTAC  
AAGAAGTCGGAGCATGTGGCCGAGGTGGTGAAGCGCTGCCCGCACCACGAGCGTGCGCCG  
GAGTACAGCGAAGACGGAGTCCCTGCTGAGCACCTGATCCCGCTCGAAGGGAACCAAAC  
GCCAGTACTTCTGTACAGGATACCAAGCGCCACAGCGTTGTGGTTCCTTATGAGATG

CCTCAGGTGGGATCGGAGTGCAGCACCGTCTCTACAGCTACATGTGCAACAGTTCCTGC  
ATGGGTGGCATGAACCGGCGCCCATCCTCACCATCGTTACGCTGGAATCTCAAGAAGGG  
CAGCTGCTCGGCCGCGCTGCTTCGAAGTACGGGTCTGCGCCTGCCCTGGCCGGGACCTC  
AAGTCGGAGGAAGAGAACTTCGTAAAGCTGCTCGTGGCGAACGGTCCAAAAAGGGAGGG  
GCTCCGGCGGAGAACGGACCCGAGAAGAAGCACAGTCCCGGGACCTCCAACAACAGAGAA  
GACGTTTACACCCTCAAGATCAGGGGACGGGATCGGTATCTCATGTTGAAGAAGATCAAC  
GATGCGCTGGAGGTCACAGATGTGCTGGAGGTCACAGACGCACAGGAGGTGCTCAAAGT  
AGGAATGGCCACAGAAGACCCGCAAGCGGAGTGC GGCGCCCCCGCCGGGCAGTGGGAAG  
AAGCTGCTGCTGAAGGACGAGGCGGGGGGCTCCAGT

>Chinese\_alligator\_TP53

ATGGAGTCGATCATGGACCCCGACCTGGACCCCCCTGAGCCAGCCCTTCCTCGACTTC  
TGGAATGTTCTGGACAACAATGTGAGATCCATCCCAAGGAGCAGGCAGAGCTGTGGGAT  
CCACAGGACCTGGTCCTAGGGCTGCCAGATTTGGGTGACTTGCCCTGCTGGAGGAGCTG  
GAAGGGGCCCCAGTGGCGGGGCTGGGAAGGGAGGCCCGCCCCGGGTGCCCTGCCACA  
TCCTCTATCGTGCCTTCCACTGAGGACTACCCCGCGCCCATGGCTTTGAGGTGGCCTTC  
CAGCCCTCGGGCACCGCCAAGTCCGTACCTGCACATACTGCCGGTGCTGAACAAGCTG  
TTCTGCCAGCTGGCACAGTCATGCCCGGTGCAGGTGCGGGTGGCACAGGCTCCGCCCCCT  
GGTGCCATGATCCGCGCTGGTGTGTCTACAAGAAGGCTGAGCACGTAGCTGAGGTCGTG  
CGGCGCTGCCCCACCATGAGCGCAGTGCCGAGCACAGTGACGGGGTGGCTCCAGCCCAG  
CACCTGATCCGAGTGGAGGGGAACCCACAGGCCAGTACTGCCACGATGAGACCACCAAG  
CGCCACAGCGTGA CTGTGCCCTACACCCCCCAGAGGTGGGCTCGGACTCCACGACTGTC  
CTCTACA ACTTCATGTGCAACAGCTCATGCATGGGGGGCATGAACCGGCGCCCAATCCTG  
GCTATCCTCACCTGGAGACGAAGAGTGGGCAGCTTCTTGCCGGCGCTGCTTTGAAGTC  
CGGATCTGTGCCTGCCCTGGCCGATCGCAAGACAGAAGAGGAGAATTTGCGCAACAAG  
GCGGCAACCACTGGGGGTGGGGCCAAGCGGGCTCTCAAGGTCCCTACAGATGACCTCCCA  
AACCCAAAGAAGCGAGTCCCGAATCCAGCACTGAGATTTTACCCTCCAGATCCGGGGC  
CATGAGCGCTATGAGATGTTCAAGAAGCTCAACGAGGGGCTGGAGGCCTTGACGGGCAG  
GAGGCCCGCGCGAGGACCCAGGCATCCGGTCCCCAAACCGCTGCTGAAGGCACGCCGT  
GCCAAGGGGCTGGCCCTGGTTTCATGCAAGAAGCTGCTGGTGAAGGACGAGAGCCAGGAC  
TCAGAC

>African\_clawed\_frog\_TP53

ATGGAACCTTCCTCTGAGACCGGCATGGACCCCCCTCAGCCAGGAGACATTCGAGGAT  
CTGTGGAGTCTGTTGCCCTGACCCCTGCAGACTGTCACGTGTCGGCTGGACAACCTATCA  
GAGTTTCCAGACTATCCCTGGCAGCAGACATGACGGTCTACAGGAGGGGCTTATGGGT  
AATGCTGTTCCACCGTCACTTCATGTGCTGTCCCCTCAACTGACGATTATGCTGGGAAG  
TATGGGCTCCA ACTGGACTTCCAACAGAACGGCACCGCAAAGTCTGTTACCTGCACGTAT  
TCCCCAGAGCTCAACAACTCTTCTGCCAGTTGGCCAAGACTTGCCCTTTGCTGGTGCCT  
GTGGAGAGCCCCCGCTCGCGGCTCCATTCTCCGGGTACGGCCGTCTACAAGAAATCT  
GAGCATGTGGCCGAGGTGGTGAAGAGATGCCCCACCATGAGCGCAGTGTGGAGCCAGGG  
GAGGATGCTGCGCCTCCAGTCACCTGATGCGAGTGGAGGGAAATCTCCAGGCTTATTAT  
ATGGAGGATGTAATAGCGGGCGCCATAGTGTCTGTGTTCCCTATGAGGGGCTCAGGTT  
GGAACGGAATGTACAACAGTTCTGTACAATTATATGTGTAACAGCTCCTGTATGGGAGGG  
ATGAACCGCCGGCCATTCTCACCATCATCACCTCGAGACCCACAGGGGCTACTTCTT  
GCCCGCGCTGTTTTGAGGTTGAGTGTGTGCTGCCAGGGAGGGATCGTCGCACAGAG



GAAGACAATTACACAAAAAGAGGGCCTGAAACCCAGCGGCAAGAGAGAACTTGCTCAC  
CCACCATCCAGTGAACCACCACTTCTAAGAAGCGTCTTGTGTTGTTGATGATGATGAA  
GAAATCTTCACTTTGCGGATTAAGGGGCGCAGCCGCTATGAGATGATTAAGAACTGAAT  
GACGCACTTGAATTACAAGAAAGCCTCGATCAGCAGAAAGTGACCATTAAGTGCCGCAAG  
TGCCGGGATGAAATCAAACCCAAGAAAGGAAAGAAGCTGCTGGTTAAAGATGAACAGCCC  
GACTCGGAA

>Tibetan\_frog\_TP53

GTCATGTGACTCCCTCACCCCATGTTTCTGTTCTCTCTCAGACTTTGCCCTCGAAGTC  
ACCTGATCCGCGTGGAAGGGAATTAATGGCTCAATACTCGGAGGACGGGAACGGGCGTC  
ACAGCGTGTGCGTGCCTTACGAGGAGCCGAGGTGGGGTCCCAGTGTACGGCCGTCCTCC  
TGAACTACATGTGTAACAGTTCTGTCATGGGGGTATGAACCGCAGACCCATCATGACCA  
TCATCACCTGGAGTCCAAGGAGGGCATCCTCCTGGGCCGGCGCTGCTTCGAGGTCCGCG  
TGTGCGCCTGTCCTGGTCGGGACCGCCGACTGAGGAGGAGAACTTACCAAGAAAAAGG  
AGCTGAAGGGCAGCGGAAGAGAGGTGAGACTCTGCGGAGGTGGGACCAG

>southern\_platyfish\_TP53

ATGGAGGAGGCGGATCTCACACTGCCTTTGAGTCAGGACACCTTCCATGACTTATGGAAC  
AATGTGTTTTTGTGCGACTGAGAATGAGTCTTGCSCCCCCAGAAAGATTGTTGAGTCAA  
AATATGGATTTTTGGGAGGATCCGAAAATATGCAGGAACTAAAAATGTGCCCACTGCA  
CCAACTGTCCCAGCGATTTCTAATTATGCTGGGGAGCATGGGTTCATCTCGAATTTAAT  
GACTCGGGCACAGCTAAAAGTGTACCTCCACATACTCAGTTAACTTGGGAAGCTGTT  
TGCCAGCTGGCAAAAACGACTCCAATTGGAGTTTTGGTTAAGGAGGAGCCTCCGAGGGT  
GCCGTCATTAGAGCAACTGCAGTATAACAAGAAGACTGAACATGTGGGAGAAGTCGTTAAG  
AGGTGCCACACCACAAAGTGAAGACTTGTCTGACAACAAGAGTACCTGATCAGAGTG  
GAGGGCAGCCAGCTGGCGCAATACTTTGAGGACCCAAACACCAGGAGGCACAGCGTGACC  
GTGCCCTACGAACGCCACAGCTGGGATCCGAGATGACCACAATCCTTCTGAGCTTTATG  
TGCAACAGCTCCTGTCATGGGAGGCATGAACGGGAGGCCATCCTCACCATCCTGACCCTG  
GAGACCACAGAGGGGGAGGTGTTGGGCAGGCGGTGCTTCGAGGTCCGTGTCTGTGCCTGT  
CCAGGCAGGGACCGCAAGACAGAGGAAGGAAACCTGGAAAAAAGTGGGACTAAGCAGACG  
AAGAAAAGAAAGAGCGCTCCTGCTCCAGATACCTCCACCGCAAAAAAGTCCAAGTCTGCC  
TCTAGTGGAGAGGATGAGGACAAGGAGATTTACTCTCTATCCGGGGCCGTAATCGT  
TATCTGTGTTCAAGAGCCTCAACGACGGTCTGGAAGTATGGATAAAACGGGGCCCAAG  
ATAAAACAGGAGATTCCTGCGCCCTCAGTGGGAAGAGGCTGCTGAAGGGGGGAAGCGAC  
AGCGAC

>spotted\_gar\_TP53

ATGGATCCAGACGCTGTCCCTCGACCTCGAAGTTCTCCCCGATTTGGACTCTTACAGT  
TTTCCGGAGGACTCTGGTGAAGCTCCTGAGCTCAGCTGCAGCAGCCTTGCTGCCTGGCCT  
GCCTGTGCCTTCTGAGCTGCTGCGAGTGCGAGGACAGCATGGCGGATCCCGAGCCTGAG  
GGGCTGCCCTGAGCCAGGAGTCTTCCAGGAGCTCTGGAACATGGTGGCTGTGCCTCCT  
GAAAATGCTCAGTGGCCAGACCTGCAGAGCATGCTGTATACCAATGAATTGGTTCCCAAC  
GCCATCGACAGCCTGTACGAGGAAGTGGAGCCTCACGTCTCCATGCCCCCAGCCCATG  
GTCTCGAACCCGGATGGCTTGGCGCCCTTCTCCTCACTGTGCCATCCACGTCCGACTAC  
CCCGGAGAGCTGGGGTCCAGCTGCGCTTCCAGCAGTCTGGCACTGCCAAGTCGGTCACC  
TGCACTTACTCCCCAGATCTGAACAAGCTGTACTGCCAGCTGGCTAAGACCTGCCCTGTC  
CAGATCTTTGTGCTAACCACCCACCCATGGGTGCCCTGATCCGAGCCATGGCTGTCTAC

AAGAAGTCGGAGCACGTAGCCGACGTGGTCCGCCGCTGCCCGCATCACGAGAGGGCCCC  
GAAAAACAACGAAGGTCTGCACCCCCAGGGCACCTGATCCGCGTGGAGGGTAGCCAGATG  
GCACAGTACATGGAAGACGGTAACACCCGCCGGCAGAGTGTGCTGGTGCCCTACGAGTCT  
CCTCAGCTGGGGTCAGAGTGCACCACTGTGCTCTACAACCTCATGTGCAACAGCAGCTGT  
ATGGGTGGCATGAACCGGCGCCCCATCCTCACTATCATCACCTTGGAGACCAAGGAGGGT  
CAGCTCCTGGGGCGCCGGTGTGTTTGGAGGTACGCGTGTGCGCCTGCCCGGCCGAGACCGC  
AAGACGGAGGAGGAGAAGTCCACAAGCAGCAGGAGAAAGGGAGCAGCAAGTCGACGGGG  
AGTAACAAGCGCAATATTAAGAAGTGAACCACTCCCTCCCTGCTGACAACAACAAG  
AAGACCAAGTCCAGTTCGAGCGCTGAGGAGGAGATATCACCTGCAGGTCCGGGGCCGG  
GAGCGATTGAGATGCTGAAGAAGATCAACGAGAGCCTGGAGCTGAAGGATCTGGTCCCA  
GTGGCGGACCTGGAGAAATACCGCCAGAAGCTGCACACCAGGAGCAGCAGCCGGAGGGAG  
AAGGACAAGGAAAAAGAGCCCAAGAAAGGGAAGAAGCTGTTGGTGAAGGAGGAGAAGACT  
GACTCCGAC

>guppy\_TP53

ATGGACCCCGACTTCAACCTCCCTTTGAGTCAGGACACCTCCATGATTTATGGAACACT  
GTTGTTTTGTGCGACTGAGAATGAGTCTTTGGCTACAGGTGACGGATTGCTGGATCTAAAT  
ATACATTTTTGGGAGAATGGAGAAGTCCACAGCAGGAACTAAAAATGTGCCTGCAGCC  
CCAATGGTCCCTGCAATTTCCAATTACGCGGGAGAATTAGATTTTGCCCTCCGATTTAGC  
GAGTCTGGCACCGCAAAAAGCGTGACTTCCACGTTTTTCAGAAAAATTGACCAAATATTC  
TGCCAGCTGGCTAAGACCACTCCGATTGGGATTTTGGTTAAGGAGGAGCCTCCGAGGGC  
GCCGTATCAGAGCAACGGCTGTGTATAAAAAGACTGAGCATGTGGCAGAAGTCGTAAG  
AGGTGCCACACCACCAAAGTGAAGACGCGTCCGACAACAAGAGCCATCTGATCCGAGTG  
GAGGGCAGCCAGCTGGCCAGTACTTTGAGGATCCGAACACCAAAGGCAGAGCGTGACC  
GTACCTTACGAACGCCACAGCGGGGATCTGAGATGACGACCATCCTGCTGAGTTTTATG  
TGCAACAGCTCCTGTATGGGAGGCATGAACCGGAGGCCATCCTTGCCATCCTGACCCTG  
GAGACCACAGAGGGGGAGGTTTTGGGCAGGCGGTGCTTCGAGGTCCGTGTCTGTGCTGT  
CCAGGCAGGGACCGCAAGACAGAGGAAGAAAACCTGGAGAAAAACGGCACTAAGCAGACA  
AAGAAAAGAAAGAGCGCTCCTGCTCCAGACACATCCACTGCTAAAAAGTCCAAGTCTGCC  
TCTAGTGGAGAAGATGAGGACAAGGAGTTGTACTCTGCAGATACGGGGCCGTGACAGA  
TTCAATATGTTTAAAAACCTGAATGATGGTCTTGAAGTCTGGACAAAACAGGGTCCAAG  
AAAAACAGGAGCTTCTGCGCCCTCCAGCGGGAAGAGGCTGCTGAAGGGGGCGAGCGAC  
AGCGAC

>American\_alligator\_TP53

ATGGAGTCGATCATGGACCCCGACCTGGACCCCCCTGAGCCAGCCCTCCTCGACTTC  
TGGAATGTTCTGGACAACAATGTGAGATCCATCCCAAGGAGCAGGCAGAGCTGTGGGAT  
CCACAGGACCTGGTCTAGGGCTGCCAGATTTGGGTGACTTGCCCTGCTGGAGGAGCTG  
GAAGGGGCCCCAGTGGCGGGGCTGGGAAGGGAGGCCACCCCCGGACGCCCTGCCACA  
TCCTCTATCGTCCTTCCACTGAGGACTACCCCGCGCCCATGGCTTTGAGGTGGCCTTC  
CAGCCCTCAGGCACCGCAAGTCCGTACCTGCACATACTGCCGGTGCTGAACAAGCTG  
TTCTGCCAGCTGGCACGGTCATGCCCCGTGCAAGTGCAGGTGCGGGTGACACAGGCTCCGCCCCCT  
GGTGTCTGATCCGCGCTGGTGTCTACAAGAAGGCTGAGCACGTAGCTGAGGTCTGTG  
CGGCGCTGCCCCACCATGAGCGCAGTGCCGAGCACAGTGACGGGGTGGCTCCAGCCCAG  
CACCTGATCCGAGTGGAGGGAAACCCACAGGCGCAGTACTGCCACGACGAGACCACCAAG  
CGTCACAGCGTGAAGTGTGCCCTACACCCCCCAGAGGTGGGCTCGGACTCCACAAGTGT

CTCTACAACTTCATGTGCAACAGCTCATGCATGGGGGGCATGAACCGGCGCCCAATCCTG  
GCTATCCTCACCTGGAGACGAAGAGTGGGCAGCTTCTTGCCGGTGCTGCTTTGAAGTC  
CGGATCTGTGCCTGCCCTGGCCGATCGCAGGACAGAAGAGGAGAATTTGCGCAACAAG  
GCGGCAACCGCTGGGGGCGGGGCCAAGCGGGGTGAGTGCTCTGGATGCCTGGGTTCTCTG  
GAGGTGGATAATGAGAGTAGCGGGGCTGGGAGACCAGGTGCCTGGGTTCTTTAGCTCT  
ATACCCCCCTCCCCCAGCTCTCAAGGTCCTGCAGATGACCTCCCAAACCCAAAGAAGC  
GAGTCCCGAATTCCAGCACTGAGATTTTACCCTCCAGATCCGGGGCCGTGAGCGCTATG  
AGATGTTCAAGAAGCTCAACGAGGGGCTGGAGGCCTTGATGGGCAGGAGGCCCGCGCCG  
AGGACCCAGGCATCCGGTCCCCCAAACCGCTGC

>Armadillo\_TP53

ATGGAGGAGCCCCGTCAGATCTGAGCATCGAGGCGCCTCTGAGTCAGGAGACATTTTCA  
GACTTATGGAACTACTTCCCAGAACAACGTTTTGTCCCATCGCTGTCTACCATGGAA  
GATCTGCTCCTCTCAGATGATGTTACCAGCTGGTTCGAAGGCCAAGATGAGCCTCTCAGA  
ACACCAGAGGCTCCTGCGCCACTACCCTGCACCAGCCGCCCCACGCCAGCCACCCCC  
TGGCCCCTGTCATCCTCTGTCCCTTCCCAAAGGAATACCCTGGCGACTATAATTTCCGT  
CTAGGCTTCTGCGTTCTGGAACAGCCAAGTCTGTCACCTGCACGTACTIONCACCTATCCTC  
AACAGCTGTTTTGCCAGCTGGCAAAGACCTGCCAGTGCAGCTTTGGGTCAACTCACCA  
CCCCCTCCTGGGGCCCGCTCCGGGCCATGGCTGTCTACAAGAAGTCCGAGCACATGAGC  
GAGGTCGTGAGGCGCTGCCCCACCACGAGCGCTGCTCAGAACATGGGGATGGTCTGGCC  
CCCCCTCAGCACCTCATCCGGGTGGAAGGAACTGCATGCCGAGTATTTGGACGACATC  
AACACCTTCGACATAGTGTGGTGGTGCCTACGAGATGCCCGAGGTGGCGCCGACTGC  
ACCACCATCCACTACAACACTACATGTGTAACAGCTCCTGCATGGGAGGCATGAATCGGCGG  
CCCATCCTCACCATCATCACCTGGAAGACTCCAATGGTAATCTGCTGGGACGGCGCAGC  
TTTGAGGTGCGTGTGTGTGCTGCTGGGAGGGACCGAAGAAATGAGGAAGACAATTTCC  
CGCAAGAAGGGGGAGCCTTGCCCTGAGCCACCGTTGGGACCACTAAGCGAACACTGCCC  
ACGACCACAGCTCGTCTCCTCCGCCAAGAAGAAGCCAATGGATGGGGAATATTTACC  
CTTCAGATCAGAGGGCGTGAACGCTTTGAGATGTTCCGAGAGCTAAATGAAGCTTTGGAG  
CTGAAGGATGCCAGACTGGGAAGGAGCCAGAGGGGAGCAGGGCTCACACCAGCTATCTG  
AAGTCTAAGAAGGGGCAATCTACCTCCCGCCATAAAAAATTACTGTTTAAGAGAGAGGCG  
CCTGACTCCGAC

>Chicken\_TP53

ATGGCGGAGGAGATGGAACCATTGCTGGAACCCACTGAGGTCTTCATGGACCTCTGGAGC  
ATGCTCCCCTATAGCATGCAACAGCTGCCCTCCCTGAGGATCACAGCAACTGGCAGGAG  
CTGAGCCCCCTGGAACCCAGCGACCCCCCCCCACCACCGCCACCACCACCTCTGCCATTG  
GCCGCCGCCGCCCCCCCCCATTAAACCCCCCCCCCCCCCGCTGCCCCCTCCCCG  
GTGGTCCCATCCACGGAGGATTATGGGGGGGACTTCGACTTCCGGGTGGGGTTTCGTGGAG  
GCGGGCACAGCCAAATCGGTCACCTGCACTTACTCCCCGGTGCTGAATAAGGTCTATTGC  
CGCCTGGCAAGCCGTGCCCGGTGAGGTGAGGGTGGGGGTGGCGCCCCCCCCCGGTTCC  
TCCCTCCGCGCCGTGGCCGTCTATAAGAAATCAGAGCACGTGGCCGAAGTGGTGCGGCGC  
TGCCCCACCACGAGCGCTGCGGGGGGGGACCGACGGCCTGGCCCCGCACAGCACCTC  
ATCCGGGTGGAGGGGAACCCAGGCGGTTACCACGACGACGAGACCACCAAACGGCAC  
AGCGTCGTCCCTATGAGCCCCCGAGGTGGGCTCTGACTGTACCACGGTGTCTGTAC  
AACTTCATGTGCAACAGTTCTGTCATGGGGGGGATGAACCGCCGCCCATCCTCACCATC  
CTTACTGAGGGGGCCGGGGGGCAGCTGTTGGGGCGGCGCTGCTTCGAGGTGCGCGTG

TGCGCATGTCCGGGGAGGGACCGCAAGATCGAGGAGGAGAACTTCCGCAAGAGGGGGCGGG  
GCCGGGGGCGTGGCTAAGCGAGCCATGTGCCCCCAACCGAAGCCCCGAGCCCCCAAG  
AAGCGGTGCTGAACCCCGACAATGAGATATTCTACCTGCAGGTGCGCGGGCGCCGCCGC  
TATGAGATGCTGAAGGAGATCAATGAGGCGCTGCAGCTGCCGAGGGGGGGTCCGCACCG  
CGGCCTTCAAAGGCCCGCCGTGTGAAGGTGGAGGGACCCCAACCCAGCTGCGGGAAGAAA  
CTGCTGCAAAAAGGCTCGGAC

>Chinese\_softshell\_turtle\_TP53

ATGGAGCCGATCTTGACACCGGACTGGATCTTCCCCTGAGTCAGGAGAGCTTCTCCGAT  
TTATGGAAAACACTTAGCCCCCTGGCAGAAGAGTACCTGGTGAAGCCTGCGGAACCGGTG  
AGCCAGGAGCTGTTTACCCTACCTGACATGAGCCTGGGCCTGTCTGGCTCTGCAGACTCC  
TCCCTCTACTTCCGCAGGCTGGGCACAGCTATGAAAGTTGGGATCTCCTTGCCTGGCC  
CTGGAGCCACCGCCACCTCCTCCACCGTCCCCTCACTGAAGATTACGCCGGGGAGCAC  
GACTTTCAACTGGCCTTCCAGCAGTCAGGGACTGCCAAGTCCGTACATGCACCTATTCC  
CCAGATCTGAACAAGCTCTTGTGTCAGCTGGCGAAGACCTGCCCGGTGCAGATCAAAGTG  
TCCAGCCAGCCCCGCCGGCTCTGTCATCCGGGCCACGGCTGTCTACAAAAAATCAGAG  
CATGTGGCTGAAGTGGTGAAGACGCTGCCCGCACCATGAGCGCTCCGCAGACTACAGTGAC  
GGGGTCGCCCCAGCCAGCACCTGATCCGCATAGAAGGGAACCATCAGGCCTATTACCGC  
GATGACGAGAACACCAAGCGCCAGAGCGTTACGGTGCCTATGAGACACCCCAAGTGGGG  
TCTGACTGCATCACTGTGCTTTACAACCTCATGTGTAACAGCTCTTGCATGGGGGGAATG  
AACCGCCGCCCATCTGGCCATCATCACTCTGGAGAGCAAGAACGGGCAGCTCCTGGGG  
CGCCGATGCTTTGAGGTTGAGTGTGCGCCTGCCCGGGCGGGACCGCAGGACGGAGGAG  
GAGAATCACCGCAAAAAATTGTCTTGCCGGGCCCTGAGCGGAAGCGTGGTCTCAAAGAG  
AGCAAAGCCAAGAGGACTCTCAAGCCACCATGGAGGCATCTGAGAACCCTAAGAAGCGG  
ACCGTGTCTCCGACAAAGAGGTCTTCTGCCTCGAAGTTCATGGGCGCGAAAACCTACGAG  
ATGCTGAAGAAAATCAACAATGCCCTGGAGGTGGCGGCTGCGAGGCCGCAGGGGGAGCTG  
GAGACTCAGAGGAACCCCAAGGCGTGGTTGAAGACCCGGAAGGAGCGGGGGGATGGGCCG  
CTGCCGCAAAGTGGGAAGAAACTGCTGGTGAAGGAAGAGGATTCAGAA

>Cod\_TP53

CCCCCACGCACGCGGCCCCACCGTGCCACCACCTCAGATTATGCCGGAGAGTACGGC  
TTTACATCCGCTTCCAGAACTCTGGAACGGCGAAATCTGTACCTCCACATACTCGGTG  
TCGCTGAACAAGCTGTTCTGCCAGCTGCCAAGACGTGCCCGGTGGAGTCTGGTGGAC  
GGGGCCCTCCCCGGGGGCCATCTGAGGGCCACGGCCGTCTACAAAAGACGGAGCAT  
GTGGCGGACGTGGTGCGGCGGTGCCCCACCACCTGAAGGAGGACGCGGTGGAACATCGC  
AGTCACCTGATCCGCGTGGAGGGGAGCCAGCGGGCCAGTACATGGAAGACCCCAACACC  
AAGCGGCAGAGTGTGACCCTGCCCTACGAGGCCCCCAAGCTGGGCTCTGGGCACACGACG  
CTGCTGCTGAACTTCATGTGCAACAGCTCCTGCATGGGAGGGATGAACCGGAGAGCCATC  
CTGACCATCTGACCCTGGAGTCTCTGAGGGGCATGTTCTCGGGCGGCGTTGCTTCGAG  
GTGCGCGTCTGCGCCTGTCCCGGGCGCGACCGCAAGACGAGGAGGGCAGCCCCCACT  
CCGGCCACCGCGGCCCGCCAAAAGGGTCTGTCCGCCTCCAGCGCTGAAGAGGAGGAT  
AAGGAGGTGTTTGTGCTTACG

>Cow\_TP53

ATGGAAGAATCACAGGCAGAACTCAATGTGGAGCCCCCTGAGTCAGGAGACATTTCC  
GACTTGTGGAACCTACTTCTGAAAATAACCTTCTGTCTCCGAGCTCTCCGCACCCGTG  
GATGACCTGCTCCCGTACACAGATGTTGCCACCTGGCTGGATGAATGTCCGAATGAAGCG

CCCCAATGCCAGAGCCTTCTGCCCCAGCTGCCCCGCCACCAGCCACCCCAGCACCAGCC  
ACCTCCTGGCCCCTGTCGTCCTTTGTCCCCTCCCAGAAGACCTACCCTGGCAATTACGGT  
TTCCGTCTAGGGTTCCTGCAATCCGGAACAGCCAAGTCCGTGACCTGCACGTATTCCCCT  
TCCCTTAACAAGCTGTTCTGCCAGCTGGCCAAGACCTGCCAGTGCAGCTGTGGGTCGAC  
TCGCCACCCCCGCCGGCACCCGCGTCCGCGCCATGGCCATCTACAAGAAGTTGGAGCAC  
ATGACGGAGGTTGTGAGGCGTTGTCCCCACCATGAGCGCTCCTCTGACTATAGCGATGGT  
CTGGCCCCTCCTCAGCACCTTATCCGGGTGGAAGGGAATTTACGCGCGGAGTATTTGGAC  
GACCGGAACACCTTTAGACACAGTGTGGTGGTGCCTATGAGTCCCCCGAGATCGACTCT  
GAGTGCACCACCATCCACTACAATTTTCATGTGTAACAGCTCCTGCATGGGGGGCATGAAC  
CGGCGGCCCATCCTCACCATCATCACACTGGAAGACTCTTGTGGTAACCTGCTGGGACGG  
AACAGCTTTGAGGTGCGTGTGTTGTGCCTGTCTGGGAGAGACCGCCGCACTGAGGAAGAA  
AATCTTCGCAAGAAGGGGACAGTCTTGCCCCGAGCCACCCCCTAGGAGCACTAAGCGAGCA  
CTGCCTACCAACACCAGCTCCTCTCCACAGCCAAAGAAGAAACCACTGGATGGAGAGTAC  
TTCCTCTTCAGATCCGTGGGTTTAAACGCTATGAGATGTTCCGAGAGCTGAATGATGCC  
TTGGAGCTGAAGGATGCTCTGGATGGAAGGGAACCAGGGGAAAGCAGGGCTCACTCTAGC  
CACCTGAAGTCTAAGAAGAGGCCTTCTCCCTCCTGCCATAAAAAACCAATGCTCAAGAGA  
GAGGGCCTGACTCAGAC

>Dog\_TP53

ATGGAGGAGTCGCAGTCAGAGCTCAATATCGACCCCCCTCTGAGCCAGGAGACATTTTCA  
GAATTGTGGAACCTGCTTCTGAAAACAATGTTCTGTCTTCGGAGCTGTGCCCAGCAGTG  
GATGAGCTGCTGCTCCCAGAGAGCGTCTGTAAGTGGCTAGACGAAGACTCAGATGATGT  
CCCAGGATGCCAGCCACTTCTGCCCCACAGCCCCTGGACCGGCCCCCTCGTGGCCCCTA  
TCATCTCTGTCCCTCCCCGAAGACCTACCCTGGCACCTATGGGTTCCGTTTGGGGTTC  
CTGCATTCCGGGACAGCCAAGTCTGTTACTTGGACGTACTCCCCTCTCCTCAACAAGTTG  
TTTTGCCAGCTGGCGAAGACCTGCCCGTGCAGCTGTGGGTCAGCTCCCCACCCCCACCC  
AATACCTGCGTCCGCGCTATGGCCATCTATAAGAAGTCGGAGTTCGTGACCGAGGTTGTG  
CGGCGCTGCCCCACCATGAACGCTGCTCTGACAGTAGTGACGGTCTTGCCCCTCCTCAG  
CATCTCATCCGAGTGGAAGGAAATTTGCGGGCCAAGTACCTGGACGACAGAAACTTTT  
CGACACAGTGTGGTGGTGCCTTATGAGCCACCCGAGGTTGGCTCTGACTATACCACCATC  
CACTACAACACTACATGTGTAACAGTTCCTGCATGGGAGGCATGAACCGGCGGCCATCCTC  
ACTATCATACCCTGGAAGACTCCAGTGGAACGCTGCTGGGACGCAACAGCTTTGAGGTA  
CGCGTTTGTGCCTGTCCCAGGAGAGACCGCCGACTGAGGAGGAGAATTTCCACAAGAAG  
GGGGAGCCTTGTCTGAGCCACCCCCGGGAGTACCAAGCGAGCACTGCCTCCCAGCACC  
AGCTCCTCTCCCCGAAAAGAAGAAGCCACTAGATGGAGAATATTTACCCTTCAGATC  
CGTGGGCGTGAACGCTATGAGATGTTTCAGGAATCTGAATGAAGCCTTGGAGCTGAAGGAT  
GCCCAGAGTGGAAAGGAGCCAGGGGGAAGCAGGGCTCACTCCAGCCACCTGAAGGCAAAG  
AAGGGCAATCTACCTCTGCCATAAAAACTGATGTTCAAGAGAGAAGGGCTTGACTCA  
GAC

>Dolphin\_TP53

ATGGAGGAGTTGCAGGCAGAACTCGGCGTGGAGCCCCCTCTGAGTCAGGAGACGTTTTCA  
GACTTGTGGAACCTGCTTCTGAAAACAACCTTCTGTCTCTGAGCTCTCCCAGCCGTG  
GATGACCTGCTGCTGTCCCAGAAGACGTCGCAAACTGGCTGGATGAACGTCCAGATGAA  
GCCCCCAAATGCCGGAGCCCCCTGCGCCAGCTGCCCCACCCCAGCCGCCCCAGCACCA  
GCCACCTCCTGGCCCCTGTCGTCCTTTGTCCCTCCCAGAAGACCTACCCTGGCAGCTAC

GGGTTCCGTCTAGGTTTCCTGCATTCCGGAACAGCCAAGTCTGTAACCTGCACGTATTCC  
CCTCCCCTCAACAAGCTGTTTTGCCAGCTGGCCAAGACCTGCCCGGTGCAGCTGTTGGTC  
AGCTACACCACCCCGCCCGGCACCCGGTCCGCGCCATGGCCATCTATAAGAAGTCAGAG  
TACATGACGGAGGTTGTGAGGCGCTGTCCCACCATGAGCGCTGCTCTGACTATAGCGAC  
GGTCTGGCCCTCCTCAGCATCTCATCCGGGTGGAAGGGAATTTACGTGCTGAGTATTTG  
GACGACAGACACTTTTTGACACAGCGTGGTGGTGCCCTACGAGCCACCCGAGGTTGGC  
TCTGACTGTACCACCATCCACTACAACCTTCATGTGTAACAGCTCCTGCATGGGAGGCATG  
AACCGGCGGCCATCCTCACCATCATCACACTGGAAGACTCGAATGGTAATCTGCTGGGA  
CGGAACAGCTTTGAGGTGCGTGTGTGCTGTCTGGGAGAGACCGCCGCACAGAGGAA  
GAAAATTTCCGCAAGAAGGGGCAGTCTTGCCCTGAGCTGCCACTGGGAGCGCTAAGCGA  
GCACTGCCTACCAGCACCAGCTCCTCTCCACCACAAAAGAAGAAACCACTGGATGGAGAA  
TATTTCACTCTTCAGATCCGTGGGCGTGAACGCTTTGAGATGTTCCGAGAGCTGAATGAG  
GCCTTGGAGCTGAAGGATGCTCAGGCTGGAAGGAGCCAGGGGAAAGCAGGGCTCACTCT  
AGCCACCTGAAGTCTAAGAAGGGGCCGTCTCCCTCCCGCCATAAAAACTGATGTTCAAG  
AGAGAAGGGCCTGATTCAGAC

>Elephant\_TP53

ATGGAGGAGCCCCAGTCAGATCTCAGCACCGAGCTCCCTCTGAGTCAAGAGACGTTTTCA  
TACTTATGGGAACTCCTTCTGAGAATCCGGTTCTGTCCCCACACTACCCCCGGCAGTG  
GAGGTCATGGACGATCTGCTACTCTCAGAAGACTGCAAACCTGGCTAGAAAGCCAAGTG  
GAGGCTCAGGGAATGTCCACAACCCCTGCACCAGCCACCCCTACACCGGTGGCCCCCGCA  
CCAGCCACCTCCTGGACCCTGTCATCTCCGTCCCTTCCAAAAGACCTACCCTGGCACC  
TATGGTTTCCGTCTGGGCTTCTACATTCTGGGACAGCCAAGTCCGTCACCTGCACGTAC  
TCCCCTGACCTTAACAAGCTGTTTTGCCAGCTGGCAAAAACCTGCCAGTGCAGCTGTGG  
GTCGCCTCACCACCCCGCCCGGCACCCGTGTTGCGACCATGGCCATCTACAAGAAGTCA  
GAGCATATGACGGAGGTCGTCAAGCGCTGCCCCACCATGAGCGCTGCTCTGACTCTAGC  
GATGGCCTGGCCCTCCTCAGCACCTCATCCGGGTGGAAGGAAACCTGCGTGCTGAGTAT  
CTGGAGGACAGCATCACTCTCCGACACAGTGTGGTGGTGCCCTACGAGCCGCCGAGGTC  
GGGTCTGACTGTACCACCATCACTTCAACTTCATGTGTAACAGCTCCTGCATGGGGGGC  
ATGAACCGGCGGCCATCCTCACCATCATCACACTGGAAGACTCCAGTGGAATCTGCTG  
GGACGTAACAGCTTTGAGGTGCGCATTTGTGCTGTCTGGAAGAGACAGACGTACAGAA  
GAAGAAAATTTCCACAAGAAGGGAGAGCCTTGCCAGAGCCGCCACCCCTGGGAGGAGC  
ACTAAGCGAGCACTGCCACCAACACCAGCTCCTCTACCCAGCCAAAGAAGAAGCCACTG  
GATGAAGAATATTTACCCCTCAGATCCGTGGGCGTGAACGCTTCAAGATGTTCTAGAG  
CTAAATGAGGCCTTGAGCTGAAGGATGCCAGGCTGGGAAGGAGCCAGAGGGGAGCCGG  
GCTCACTCCAGCCCTTCGAAGTCTAAGAAGGGACAGTCTACCTCCCGCCATAAAAAACCA  
ATGTTCAAGAGAGAGGGACCTGACTCAGAC

>tropical\_clawed\_frog\_TP53

ATGGAACCTTCTCTGAGACCGGCATGGAGCCGCCCTCAGCCAGGAGACCTTCGAGGAT  
TTGTGGAGCCTGTTGCCGACCCCTACAGACCGGGACAGGTCAGATGGAAAACCTTTGCG  
GAGTTTTAGAGTACCCCTGGCGCCAGACATGACGGTTCTGCAGGAAGGGCTTATGGGT  
AATACCGTGCCACCGTGACTTCGTCTGCTGTCCCCTCAACTGAGGATTACGCAGGGAGC  
TACGGGCTCAAATTGGAGTTCCAACAGAATGGAACCGCAAAGTCTGTTACCTGCACATAC  
TCCACCGACCTCAACAAGCTCTTCTGCCAATTGGCCAAGACCTGCCCTTTGCTGGTCCGT  
GTGGAGAGACCCCGCCGCTCGGCTCCATTCTCCGGCTACGGCCGTGTACAAGAAATCC

GAGCACGTGGCCGAGGTGGTCAAGAGGTGCCCCACCATGAGCGCAGCGTGGAGCCAGGG  
GATGACCCTGCCCTCCCAGTCACCTGATGCGCGTGGAGGGAAATTCAAAGGCTTATTAT  
ATGGAGGATGTTGGTACCGGGCGCCATAGTGTCTGTGTGCCCTATGAGGGCCCTCAGGTC  
GGAACCGAATGTACCACGTTCTGTACAACATATGTGTAACAGCTCGTGTATGGGTGGG  
ATGAACCGCCGGCCATTCTCACTATTATCACCTGGAGTCCCCAGAGGGGCTGCTGCTT  
GGCCGCCGCTGCTTTGAGGTTCTGTGTGTGCGCCTGCCCCGGGAGGGATCGTCGCACAGAA  
GAAGATAATTGCACAAAGAAACGGGGCCTGAAACCCAACGGGAAGAGAGAGCTTTCTCAC  
CCACCATCCAGTGACCCTCCACTTCCCAAGAAGCGCCTTGTGAGGAGGATGATGAAGAG  
ACCTTCACCTTGCTGATTAAGGGGCGGAGCCGCTATGAGATGATAAAGAAACTGAATGAC  
GCACTTGAATTACAAGAGAGCCTCGACCAGCAGAAACTGTCCATAAAGTGCCGCAAGTGC  
CGGGACGAGATCAAACCCAAGAAAGGGAAGAAGCTGCTGGTGAAGATGAGCTGCAGGAC  
TCCGAG

>Fruitfly\_TP53

ATGTATATATCACAGCCAATGTCGTGGCACAAGAAAGCACTGATTCCGAGGATGACTCC  
ACGGAGGTGCATATCAAGGAGGATATTCGAAAACGGTGGAGGTATCGGGATCGGAATTG  
ACCACGGAACCCATGGCCTTCTTGAGGGATTAAACTCCGGGAATCTGATGCAGTTCAGC  
CAGCAATCCGTGCTGCGCGAAATGATGCTGCAGGACATTAGATCCAGGCGAACACGCTG  
CCCAAGCTAGAGAATCACAACATCGGTGTTATTGCTTCAGCATGGTTCTGGATGAGCCG  
CCCAAGTCTCTTTGGATGTACTCGATTCCGCTGAACAAGCTCTACATCCGGATGAACAAG  
GCCTTCAACGTGGACGTTCAAGTCTAAAATGCCATCCAACCACTTAATTTGCGT  
GTGTTCTTTGCTTCTCCAATGATGTGAGTGCTCCCGTGGTCCGCTGTCAAATCACCTT  
AGCGTTGAGCCTTTGACGGCCAATAACGCAAAAATGCGCGAGAGCTTGCTGCGCAGCGAG  
AATCCCAACAGTGATATTGTGGAAATGCTCAGGGCAAGGGAATTCGAGCGTTTTTCC  
GTTGTAGTCCCCCTGAACATGAGCCGGTCTGTAACCCGAGTGGGCTCACGCGCCAGACC  
CTGGCCTTCAAGTTCGTCTGCCAAAACCTCGTGTATCGGGCGAAAAGAACTTCCTTAGTC  
TTCTGCCTGGAGAAAGCATGCGGGCGATATCGTGGGACAGCATGTTATACATGTTAAAATA  
TGTACGTGCCCCAAGCGGGATCGCATCCAAGACGAACGCCAGCTCAATAGCAAGAAGCGC  
AAGTCCGTGCCGGAAGCCGCCGAAGAAGATGAGCCGTCCAAGGTGCGTCGGTGCATTGCT  
ATAAAGACGGAGGACACGGAGAGCAATGATAGCCGAGACTGCGACGACTCCGCCGCAGAG  
TGGAACGTGTGCGGGACACCGGATGGCGATTACCGTCTGGCTATTACGTGCCCAATAAG  
GAATGGCTGCTGCAGAGCATCGAGGGCATGATTAAGGAGGCGGCGGCTGAAGTCTGCGC  
AATCCCAACCAAGAGAATCTACGTGCCATGCCAACAAATTGCTGAGCCTTAAGAAACGT  
GCCTACGAGCTGCCA

>Fugu\_TP53

ATGGAAGATGAAGGCTTCAGTTTGCCTCTGAGCCAGGACACCTTTCAGGATCTGTGGGAG  
AATGTGGCGGCACCCTCCATAGTTACGATCCCAACAACGAGCTTGAAAACGAGCAATGG  
CACCAAGAATTCTCATGAACTACCCAGAGTTGCCTTTCATGAAGAACTTTCATCTG  
CCCTCGGAGATGGCGAGCAAAGACAGCGGAACCTTCCACCCCAACCGTCCCGGTTACC  
ACCGATTACCCAGGAGAATATGGCTTTGAGCTGCGCTTCCAAAAGTCCGGCACTGCAAAG  
TCCGTCACCTCCACCTACTCCGAGATCCTCAATAAGTTGTAAGTCCAGCTTGCCAAGACC  
AGCCTGGTTGAGGTGCTTCTCATCAAGAAGCCTCCTGCGGGCGCCGTCTGAGGGCTACA  
GCCATTTACAAGAAGATCGAACACGTGGCAGATGTGGTCCGCCGGTGCCCCACCACCAA  
AACGAGGACTCCGCGGCACACCGGAGCCATCTCATCAGAATGGAGGGCAGCCAGCGGGCT  
CAGTACTTTGAGGATCCGCACACAAAAAGACAGAGCGTGACGGTCCGTACGAGCCCCC

CAGCTCGGCTCTGAATTCACCACCATCCTCCTCAGTTTTATGTGCAATAGTTCCTGCATG  
GGGGGCATGAACCGCCGCCATCCTCACCATCCTGACCCTGGAGACTCAGGAGGGCGTG  
GTCTTGGGCCGAGGTGCTTTGAGGTCCGTGTCTGCGCATGTCCCGGCAGGGACCGCAA  
ACGGAGGAGGCCAACAGCACCAATATGCAGAACGGAACCAAAGAACTAAGAAGCGAAAG  
AGCGTCCCACCTCCTGCCGCCGCCGCCGCCAAGAAGTCCAAGACGGCCTCCAGTGCC  
GAGGAGGACGACAAGGAGCTTTTCACTCTGCAGATCCGCGGTGCGAAACGCTACGAAATG  
CTGAAGAAGATCAACGACGGTCTGGAATTGCTTGAAAATAAACCCAAGTGCAAGGCCGCT  
GCCAAACCGGAGTGTCCTCCGAGAGGCAAGAGGCTGCTGCACCGGGGAGAGAAG  
AGCGACAGCGAC

>Anole\_lizard\_TP53

ATGGCCTCCGCGGCTTCTCCTCGCGTAACGGGCGAGACTTGAGACCGGGGATTCCCCG  
GCACATGGGTGCTGTGCTGTGCCTTGCTTGGCGCCCGGGATTTCATTTGGAAGCGATG  
CAGAGGCGAGGAGGGATGGAAGACCCTTCGCTCCTTGATTCCGATTTCCGGATGATGGAG  
ATGGACCCAAACGAAGTCTTGACCTGGTGCCCATGCCAAGCTCCCCTCTGAGCCAGGAC  
ACCTTCAAACCCTGTGGAGCTCCTTACTGGACGAAAAGAGGATCAGTCCCTTTGAAT  
CCGACCTGCCGTATCCCATGTCCTATGAGGAAGGGACCAGCCCGAAGGCAGCGGAAGGG  
GACTACAGCACCTCGAACCGTTTCATCGGTGTTCTGCTCGACACCCATCATCCCCTCC  
ACCGAGGACTATGTTGGTGACCACGGCTTCGAGCTGGCCTTTGAGCAGTCGGGCACCGCC  
AAGTCCGTACCTGCACCTATTCTCAAAGCTCAACAACTTTTTTGGCAGCTGGCCAAG  
ACCTGCCCCGTCCACATCAAAGTGCCAACATGCCCCCTTTGGGTGCCGTATCCGCACC  
ATGGCCGTCTACAAGAAGTCCGAACACGTGGCCGAAGTGGTGAAGCGCTGCCACACCAC  
GAGCGTTCTCAGGAGTTCAGCGACAGCAGTGCGCCAGCTGAGCACCTCATAAGGGTGGAG  
GCCAATCAGCAGGCCAGATACATTGCCGACCCAAACAGGCGCCACAGTGTCATCGTCCCA  
TATGAACCGCCACAGTTCGGGACCGATAATACTACTTTATTGCTCAATTTTATGTGCAAT  
AGCTCTTGCATGGGAGGCATGAACCGCGTGCCATTTTGGCCATCATCACTTTGGAGACT  
CTGCAAGGTGACCTCCTCGGACGCGCTGCTTCGAGGTCCGGGTTTGCCTTGTCCCGGG  
AGGGACCGAAGTTCGGAGGAGGAGAATGCCCTGAAAGCAGCCGTCCCTAAAGGGAATCC  
AAAAAAGTTGTTCTCCAGCTGCTCCTCGGAGCAACTCTTCTGAAAACGCTAAGAGATCA  
GCTGCGGGGTCTTCCAACCACGAGACCGAAAGCGGACCCTATATCCTCCAGGTCCGCAAT  
CGGAAACACTACCGGATGCTGAAGATGATCCTGGAAGGGCTTGAATTCGCGAGAAGCAG  
CAAGGAGAGGAGGAAGAGGAGGCGGAGCCAGAAACCCGCTGCTTGCCAAAGGCTCCAAA  
CGGAAGAGGCTCAGAGTGAAGGACGAGAACCCAGATTTCGGAC

>Horse\_TP53

ATGGAGGAGACGCAGACAGAACTCGGCATCGAGCCCCCTCTGAGTCAGGAGACGTTTTCA  
GATTTGTGGAAGCTACTTCTGAAAACAATGTTCTGTCCCCTGACCTGTCCCAGCAGTG  
AATAATCTGCTGCTGTCCCAGATGTTGTGAACTGGCTGGATGAAGGCCAGATGAAGCC  
CCCAGAATGCCAGCAGCTCCTGCACCACTAGCCCCTGCACCAGCCACCTCCTGGCCCCTG  
TCATCCTTTGTCCCTTCCAAAAGACCTACCCTGGCTGCTATGGTTTCCGTTTAGGGTTC  
CTGAATTCTGGGACAGCCAAGTCTGTTACTTGCACGTACTCCCCTACCCTCAACAACTG  
TTTTGCCAGCTGGCAAAGACCTGCCCCGTGCAGCTCCTGGTCAGCTACCACCCCCACCC  
GGCACCCGTGTCCGGGCCATGGCCATCTACAAGAAGTCAGAGTTCATGACGGAGGTCGTG  
AGGCGCTGCCCCACCATGAACGCTGCTCTGACAGTAGCGATGGTCTGGCCCCCTCCTCAG  
CATCTCATCCGGGTGGAAGGGAATCTGCGTGCTGAGTATTTGGAAGACAGAAACACTTTT  
CGACATAGCGTGGTGGTGCCTACGAGCCACCTGAGGTTGGCTCTGACTGTACCACCATC



CACTACAACCTTCATGTGTAACAGCTCCTGCATGGGCGGCATGAACCGGCGGCCCATCCTC  
ACTATCATCACCTGGAAGACTCCAGTGGTAATCTGCTGGGACGGAACAGCTTTGAGGTG  
CGTGTGGTGTGCCTGTCTGGGAGAGACCGGCGCACAGAGGAAGAAAATTCCGCAAGAAG  
GAGGAACCTTGCCCTGAGCCGCTCCTAGGAGCACTAAGCGAGTATTGTCCAGTAACACC  
AGCTCCTCTCCCCACAAAAGAAGAAGCCACTGGATGGAGAATATTTACCCTTCAGATC  
CGTGGGCGTGAACGTTTTGAGATGTTCCGAGAGCTGAATGAGGCCTTGAGCTGAAAGAT  
GCCAGACTGGAAGGAGCCAGGGGAAGCAAGGCTCACTCCAGCCACCTGAAGTCTAAG  
AAGGGGCAGTCTACCTCCTCCATAAAAAGCTGATATTCAAGAGAGAAGGGCCTGACTCA  
GAC

>Human\_TP53

ATGGAGGAGCCGAGTCAGATCCTAGCGTCGAGCCCCCTGAGTCAGGAAACATTTTCA  
GACCTATGGAACTACTTCTGAAAACAACGTTCTGTCCCCCTTGCCGTCCAAGCAATG  
GATGATTTGATGCTGTCCCCGGACGATATTGAACAATGGTTCACTGAAGACCCAGGTCCA  
GATGAAGCTCCAGAATGCCAGAGGCTGCTCCCCGCGTGGCCCTGCACCAGCAGCTCCT  
ACACCGGCGGCCCTGCACCAGCCCCCTCTGGCCCCTGTCATCTTCTGTCCCTCCCAG  
AAAACCTACCAGGGCAGCTACGGTTTCCGTCTGGGCTTCTTGCACTTCTGGGACAGCCAAG  
TCTGTGACTTGACGTAATCCCCTGCCCTCAACAAGATGTTTTGCCAACTGGCCAAGACC  
TGCCCTGTGCAGCTGTGGGTTGATTCCACACCCCCGCGGCACCCGCGTCCGCGCCATG  
GCCATCTACAAGCAGTCACAGCACATGACGGAGGTTGTGAGGCGCTGCCCCACCATGAG  
CGCTGCTCAGATAGCGATGGTCTGGCCCCCTCCTCAGCATCTTATCCGAGTGGAAGGAAAT  
TTGCGTGTGGAGTATTTGGATGACAGAAACTTTTCGACATAGTGTGGTGGTGCCTAT  
GAGCCGCTGAGGTTGGCTCTGACTGTACCACCATCCACTACAACACTACATGTGTAACAGT  
TCCTGCATGGGCGGCATGAACCGGAGGCCATCCTCACCATCATCACACTGGAAGACTCC  
AGTGGTAATCTACTGGGACGGAACAGCTTTGAGGTGCGTGTGGTGTGCTGCTGGGAGA  
GACCGGCGCACAGAGGAAGAGAATCTCCGCAAGAAAGGGGAGCCTCACCACGAGCTGCCC  
CCAGGGAGCACTAAGCGAGCACTGCCAAACAACACCAGCTCCTCTCCCCAGCCAAAGAAG  
AAACCACTGGATGGAGAATATTTACCCTTCAGATCCGTGGGCGTGAGCGTTTCGAGATG  
TTCCGAGAGCTGAATGAGGCCTTGGAACTCAAGGATGCCAGGCTGGGAAGGAGCCAGGG  
GGGAGCAGGGCTCACTCCAGCCACCTGAAGTCAAAAAGGGTCAGTCTACCTCCCGCCAT  
AAAAAACTCATGTTCAAGACAGAAGGGCCTGACTCAGAC

>Macaque\_TP53

ATGGAGGAGCCGAGTCAGATCCTAGCATCGAGCCCCCTGAGTCAGGAAACATTTTCA  
GACCTATGGAACTACTTCTGAAAACAACGTTCTGTCCCCCTTGCCGTCCAAGCAGTG  
GATGATTTGATGCTGTCTCCAGACGATCTTGACAATGGTTAACTGAAGACCCAGGTCCA  
GATGAAGCTCCGAGAATGTGAGAGGCTGCTCCCCCATGGCCCCACACCAGCAGCTCCT  
ACACCGGCGGCCCTGCACCAGCCCCCTCTGGCCCCTGTCATCCTCTGTCCCTCCCAG  
AAAACCTACCATGGCAGTACGGTTTCCGTCTGGGCTTCTGCATTCTGGAACAGCCAAG  
TCTGTGACTTGACGTAATCCCCTGACCTCAACAAGATGTTTTGCCAGCTGGCCAAGACC  
TGCCCCGTGCAGCTATGGGTTGATTCCACACCCCCACCGGCAGCCGCGTCCGCGCCATG  
GCCATCTACAAGCAGTCACAGCACATGACGGAGGTCGTGAGGCGCTGCCCCACCATGAG  
CGCTGCTCAGACAGCGATGGACTGGCCCCCTCCTCAGCACCTTATCCGAGTGGAAGGAAAT  
TTGCGTGTGGAGTATTCGGATGACAGAAACTTTTCGACATAGTGTGGTGGTGCCTAT  
GAGCCGCTGAGGTTGGCTCTGACTGTACCACCATCCACTACAACACTACATGTGTAACAGT  
TCCTGCATGGGCGGCATGAACCGGAGGCCATCCTTACCATTATCACACTGGAAGACTCC

AGTGGTAATCTACTGGGACGGAACAGCTTTGAGGTGCGAGTTTGTGCCTGTCCTGGGAGA  
GACCGGCGCACAGAGGAAGAGAATTTCCGCAAGAAAGGGGAGCCTTGCCACCAGCTGCCC  
CCTGGGAGCACTAAGCGAGCACTGCCAACACACCAGCTCCTCTCCCCAGCCAAAGAAG  
AAACCACTGGATGGAGAATATTTACCCTTCAGATCCGTGGGCGTGAGCGCTTCGAGATG  
TTCCGAGAGCTGAATGAGGCCTTGGAACAAGGATGCCAGGCTGGGAAAGAGCCAGCG  
GGGAGCAGGGCTCACTCCAGCCACCTGAAGTCCAAGAAGGGGCAATCTACCTCCCGCCAT  
AAAAAATTCATGTTCAAGACAGAGGGGCTGACTCAGAC

>Medaka\_TP53

ATGGATCCTGTACCCGACCTGCCCCGAGAGCCAAGGTTCTTTTCAAGAACTCTGGGAGACT  
GTTAGTTATCCTCCGTTGGAACTTTATCACTTCCAAGTAAATGAGCCCACCGGGTCA  
TGGGTCGCAACGGGGATATGTTTCTTGGATCAAGACCTCAGTGGGACCTTCGATGAC  
AAGATCTTYGACATACCGATTGAGCCAGTTCACCAACGAAGTAAACCCGCCACCYACC  
ACCGTCCCGGTGACCACCGACTACCCGGAAGCTACGAACTGGAATTCGTTTTCAAAAA  
TCTGGCACTGCAAAGTCTGTGACGTCCACATACTGAAACTTTAAATAAGCTGTAAGTGC  
CAGCTTGCAAAAACAGCCCCATAGAAGTCCGGGTGAGCAAGGAGCCTCCAAAGGGCGCC  
ATTCTCAGGGCCACTGCGGTCTACAAGAAGACGGAGCACGTGGCGGACGTGGTGAGGAGG  
TGTCCCCACCACAAAACGAGGACTCTGTGGAGCACCGAAGCCATCTGATTCGGGTGGAG  
GGCAGCCAGCTGGCCAGTATTTGAAGACCCTTATACAAAAGGCAGAGTGTACAGTT  
CCTTATGAGCCCCCGCAGCCGGGCTCTGAGATGACCACCATCYTGCTYAGCTACATGTGT  
AACAGCTCGTGCATGGGGGGGATGAACCGCAGACCCATCCTCACCATCCTCACTCTGGAA  
ACCGAGGGTCTGGTTCTTGCCGGAGGTGTTTYGAGGTCAGAATCTGTGCTTGCCCGGGG  
CGGGACCGCAAAACGGAGGAGGAAAGCCGGCAGAAAACGCAGCCCCAAAAAAGGAAGGTG  
ACACCAACACCTCCTCCTAAGAGGAAGAAGTCCCACTCAAGTGGAGAGGAGGAGGAC  
AACAGAGAAGTCTTTTATTTGAGGTTTATGGGAGGGAGCGCTACGAGTTCCTTAAGAAG  
ATAAACGATGGCCTTGAAGTCTGGAAAAGGAGAGCAAAAAGTAAAAACAAAGATTCTGGG  
ATGGTCCCCTCCAGTGGGAAGAAGCTGAAGAGCAAT

>Mouse\_TP53

ATGACTGCCATGGAGGAGTCACAGTCGGATATCAGCCTCGAGCTCCCTCTGAGCCAGGAG  
ACATTTTCAGGCTTATGGAACTACTTCTCCAGAAGATATCCTGCCATCACCTCACTGC  
ATGGACGATCTGTTGCTGCCCCAGGATGTTGAGGAGTTTTTTGAAGGCCAAGTGAAGCC  
CTCCGAGTGTGAGGAGCTCCTGCAGCACAGGACCCTGTCACCGAGACCCCTGGGCCAGTG  
GCCCCTGCCCCAGCCACTCCATGGCCCCTGTCATCTTTTGTCCCTTCTCAAAAACTTAC  
CAGGGCAACTATGGCTTCCACCTGGGCTTCTGCAGTCTGGGACAGCCAAGTCTGTTATG  
TGCACGTAATCTCCTCCCCTCAATAAGCTATTCTGCCAGCTGGCGAAGACGTGCCCTGTG  
CAGTTGTGGGTGAGCGCCACACCTCCAGCTGGGAGCCGTGTCCGCGCCATGGCCATCTAC  
AAGAAGTCACAGCACATGACGGAGGTCGTGAGACGCTGCCCCACCATGAGCGCTGCTCC  
GATGGTGATGGCCTGGCTCCTCCCCAGCATCTTATCCGGGTGGAAGGAAATTTGTATCCC  
GAGTATCTGGAAGACAGGCACTTTTCGCCACAGCGTGGTGGTACCTTATGAGCCACCC  
GAGGCCGGCTCTGAGTATACCACCATCCACTACAAGTACATGTGTAATAGCTCCTGCATG  
GGGGCATGAACCGCCGACCTATCCTTACCATCATCACTGGAAGACTCCAGTGGGAAC  
CTTCTGGGACGGGACAGCTTTGAGGTTCTGTTTGTGCCTGCCCTGGGAGAGACCGCGT  
ACAGAAGAAGAAAATTTCCGCAAAAAGGAAGTCTTTGCCCTGAACTGCCCCAGGGAGC  
GCAAAGAGAGCGCTGCCACCTGCACAAGCGCTCTCCCCGCAAAAAGAAAAAACCCTT  
GATGGAGAGTATTTACCCTCAAGATCCGCGGGCGTAAACGCTTCGAGATGTTCCGGGAG

CTGAATGAGGCCTTAGAGTTAAAGGATGCCCATGCTACAGAGGAGTCTGGAGACAGCAGG  
GCTCACTCCAGCTACCTGAAGACCAAGAAGGGCCAGTCTACTTCCCGCCATAAAAAACA  
ATGGTCAAGAAAGTGGGGCCTGACTCAGAC

>Naked\_mole\_rat\_TP53

ATGGAAGAGCCACAGTCGGATCTCAGCATCGAGCCTCCACTGAGTCAGGAGACATTTTCA  
GACTTATGGAACTACTTCTGAAAACAACGTTCTGTCCAGCTCACTGTCCTCTCCCATG  
GATGATCTGCTGCTGTCCCCAGAAGATGTTGTAAACTGGCTGGGAGGAAACCCAGATGAA  
GATGTCCAAGTGTGTCAGCAGCTCCTGTACCAGAGCCCCAACACCAGTGGCCCCTGCCCCG  
GCAGTCCCGCACCAGCCACTTCTGGCCTCTGTCATCCTCCGTCCCTTCCATAAGACC  
TACCAAGGCAACTATGGTTTCCATCTGGGCTTCTTTCAGTCTGGGACGGCCAAATCTGTC  
ACATGCACGTACTCCCCTGTTCTCAACAAGTTATTCTGCCAACTGGCAAAGACCTGCCCT  
GTGCAAGTGTGGGTGAATCACCACCCACCTGGCACCCGAGTCCGTGCCATGGCCATC  
TACAAGAAGTCACAGCACATGACAGAAGTTGTGAGGCGCTGCCCCACCATGAGCGCTGC  
TCCGATAGTGATGGCCTGGCCCCTCTCAGCATCTTATCCGGGTGGAAGGAAATCTGCGT  
GCAGAATATTTGGATGACAGAACCACTTTTCGCCATAGCGTGGTGGTACCCTATGATCTG  
CCTGAGGTTGGCTCTGACTGTACCACCATCCACTACAACATATGTGCAACAGTTCTTGC  
ATGGGGGGCATGAACCGTAGGCCATCCTCACCATTATCACACTGGAAGACTCCAGTGGG  
AACCTGCTGGGGCGGAACAGCTTTGAGGTGCGTGTGTTGTGCCTGTCTGGGAGAGACCGG  
CGCACAGAGGAAGAAAATTTCCACAAGAAAGGGGGTTCATGCCAGAGCCAACACCAGGA  
AGCATTAAAGCGAGCACTGCCACTGGCACCAACTCTTCTCCTCAGCCAAAGAAGAAACCA  
CTGGATGGGGAATATTTACCCTTAAGATCCGTGGGCGTGAACGCTTTGAGATGTTCCGA  
GAGCTAAATGAGGCCTTGGAACTCAAGGATGCCCAAAGTGAAGAGGAGCCAGGGGAGAGC  
AGGCCTCACTCAAGCTACCTGAAGTCTAAGAAGGGGGCAGTCTACCTCCTGTCATAAAAA  
CTAATGTTCAAGAAAGAAGGACCTGATTCAGAC

>Opossum\_TP53

ATGAGTCAGTCTTTAATCATTACCATAAGATTTATCCAAGCAAGATTCTAGGGGTCAA  
CTTCTTGACGTGAAGCTTTGAAGTTCGTATATGTGCCTGCCCTGGAAGAGACCGGCGG  
ACTGAGGAGGAAAATTTCCACAAGAAGGGAGGTCCAGCCACAGCCATCATCTGAGAGC  
AATAAGCGTGATTACCCACAACGCCTGGCAGCACTCCAAGGCTAAAAAGAAGCTAGTG  
GAAGGAGAATATTTCACTCTTCAGATCCGAGGTGACAGCGCTATGAGCTGCTCCGGGAG  
ATAAATGAAGCCTTGAGCTGAAAGAAGCTCACAGCAGGAAAGAACCTGAGGGGAGCCCG  
CCCCACCGCAGCCAATTGAAGTCCAAGAGAGGAGATTCCACCCCTGTCAAGGCAAAGA  
CTTTTGGTGAAAAATGAAGTTCCTGACTCAGAC

>Orangutan\_TP53

ATGGAGGAGCCACAGTCAGATCCTAGCGTCGAGCCCCACTGAGCCAGGAAACATTTTCA  
GACCTATGGAACTACTTCTGAAAACAACGTTCTGTCCCCCTTGCCGTCCCAAGCGGTG  
GATGATTTGCTGCTGTCCCCGGACGATATTGCACAATGGTTCATTGAAGACCCAGGTCCA  
GATGAAGCTCCAGAATGTCAGAGGCTGCTTCCCCTGTGGGCCCCGCACCAGCAGCTCCT  
ATACCGGCGGCCCTGCACCAGCCCCCTCTGGCCCCTGTCATCCTCTGTCCCTTCCCAG  
AAAACCTACCAGGGCAGCTACGGTTTCCGTCTGGGCTTCTTGCATTCTGGGACAGCCAAG  
TCTGTGACTTGACGTACTCCCCTGCCCTCAACAAGATGTTTTGCCAGCTGGCCAAGACC  
TGCCCTGTGACGCTGTGGGTTGATTCCACACCCCCACCTGGCACCCGCTCCGCGCCATG  
GCCATCTACAAGCAGTCACAGCACATGACGGAGGTGCTGAGGCGCTGTCCCACCATGAG  
CGTGCTCAGATAGTGATGGTCTGGCCCCTCTCAGCATCTTATCCGAGTGAAGGAAAT

TTGCGTGTGGAGTATTTGGATGACAGAAACACTTTTCGACATAGTGTGGTGGTGCCTAT  
GAGCCGCCTGAGGTTGGCTCTGACTGTACCACCATCCACTACAACACTACATGTGTAACAGT  
TCCTGCATGGGCGGCATGAACCGGAGGCCCATCCTCACCATCATCACACTGGAAGACTCC  
AGTGGTAATCTACTGGGACGGAACAGCTTTGAGGTGCGCGTTTGTGCTGTCTGGGAGA  
GACCGGCGCACAGAGGAAGAGAATTTCCGCAAGAAAGGGGAGCCTCACCATGAGCTGCCC  
CCTGGGAGACTAAGCGAGCACTGCCAACAAACACCAGCTCCTCTCCCCAGCCAAAGAAG  
AAACCACTGGATGGAGAATATTTACCCCTTCAGATCCGTGGGCGTGAGCGCTTCGAGATG  
TTCCGAGAGCTGAATGAGGCCTTGGAACTCAAGGATGCCAGGCTGGGAAGGAGCCAGGG  
GGGAGCAGGGCTCACTCCAGCCACCTGAAGTCCAAGAAGGGTCAGTCTACCTCCCGCCAT  
AAAAAACTCATGTTCAAGACAGAAGGGCCTGACTCAGAC

>Western\_painted\_turtle\_TP53

ATGGAGCCGATGTTGGACCCCGGGCTAGAGCCGCCCTGAGCCAGGAGAGCTTCTCTGAT  
TTCTGGAGCAATATCTGGTATCCCACGAACGCGGATTCCACCGCAACGGAGAGCCAGCGG  
CTGTCTAGCCTGCCGACCCAGACCCGGACCTGGCCCTGGGCTGGCCCTGGGCTGTCT  
GGCTCGGGGGACCCCTCCCTCCTGCTCTCACAGGCTGGGGGCAGCGACGGGGGCTGGGAG  
CTCCCCGGCCCGGCCAGAGCCGCCCCACCTTTCACCTGTCCCCTCCACCGAGGAC  
TACGCTGGGGAGCACGGATTTCGAGCTGGTCTTCAGCAGTCGGGGACCGCCAAGTCCGTC  
ACCTGCACCTACTCCTTGAGACTGAACAAGCTCTACTGCCAGCTGGCAAAGACCTGCCCT  
GTGCAGATCAAGACGGCCAGCCAGCCCCCGCCGGCTCCGTCGTCGGGCCACAGCCGTC  
TACAAGAAATCGGAGCACGTGGCCGAGGTGGTGAGACGCTGCCCCACCACGAACGCTGC  
GAGGAGTACCGCGACGGGGTCGCCCCGGCCCGCCACCTGATCCGGATCGAGGGGAACCAG  
CAGGCGCATTACTACGATGACGAAAACACCAAGCGCCAGAGTGTACGGTGCCCTATGAG  
ACGCCCCAGGTGGGGTCAGACTGCACCACCGTGTGTATAACTTCATGTGTAACAGTTCC  
TGCATGGGGGGCATGAACCGGCGCCCCATCCTGGCCATCATCACTCTGGAGGGCAGGCAC  
GGGACGCTCCTGGGCCCGCCATGCTTCGAGGTTGAGTCTGCGCCTGCCCCGGACGGGAC  
CGCAGGACAGAGGAGGATAATTTCCGCAAGAAATTGGCCGGCAGGGTCTGAGCGGGGCC  
GGGGCCCTCAAAGGGGGCAGAGCCAAGAGGGCTCTCCAGGCTACCATGGAAACAGCTGAG  
AACCCCAAGAAGCGGGTGGTGTCCGCCGAGAAAGAGGTCTTCTACTCGAGGTTTCATGGG  
CGCAAGCGATACATGATGCTGAAGGAAATCAACGACGCCCTGGAGATGGTGGCCGCAAG  
CAGCAGGGGGAGCCGGAGAGTACCCGGAACCCACGCCCTCGAGGTTGCTGAAGACCCGG  
AAGGAGTCAGGGGACGAGCTGCTGCCTCAGAGTGGAAAGAAGCTGCTGGTGAAGGAGGAG  
GATTCGGAA

>Panda\_TP53

ATGCAGGACCCACAGTCGGAGCTCACCATCGACCCCTCTGAGCCAGGAGACATTTTCC  
GAATTGTGGAACCTACTTCTGAAAACAATGTTCTGTCTTCCGAGCTGTCCCAGGAGTG  
GATGAACTGCTGCTCTCAGAAGGCGTCGTGAACTGGATGGACGAAGGTTTCAGATGACT  
CCCAGGATGCCAGTGGCTCCTGCCCTGCGGCCCTGGACCAGCCATCTCCTGGCCCTG  
TCATCCTCTGTCCCTCCCCGAAGACCTACCCTGGCACCTATGGGTTCCGTCTGGGGTTC  
CTGCATTCCGGGACAGCCAAGTCTGTTACTTGCACGTACTCCCCCTCCCTCAACAAGCTG  
TTTTGCCAGCTGGCAAAGACCTGCCCGTGCACTGTGGGTCAACTCCCCGCCCCACCC  
GACACCTGCGTCCGCGCCATGGCCATTTATAAGAAGTCGGAGTTCGTGACAGAGGTTGTG  
CGGCGCTGTCCCACCATGAGCGCTGCTCTGACAGTAGTGATGGGCTGGCCCCGCCTCAG  
CATCTCATCCGGGTGGAAGGAACTTGCGTGCCAAGTACTTGACGACAGAAACACTTTT  
CGACATAGCGTGGTGGTGCCTATGAGCCGCCCGAGGTCGGCTCTGACTGTACCACCGTC

CACTATAACTACATGTGTAACAGTTCCTGCATGGGAGGCATGAACCGGCGGCCATCCTC  
ACCATCATCACCTGGAAGATTCCAGTGGTAATGTGCTGGGACGGAGCAGCTTTGAGGTA  
CGTGTCTGTGCCTGTCTGGGAGAGACCGGCGCACAGAGGAGGAGAATTTCCGTAAGAAG  
GGGGAGCCTTCCCCGAGCTGCCCCCGGAAGCACTAAGCGAGCACTGCCTCCCAGCACC  
AGCTGCTCTCCCCACAAAAGAAGAAGCCACTGGATGGGGAATATTTACCCTTCAGATC  
CGTGGGCGTGAACGTTTTCAATATGTTCCAGGGAGCTGAATGAGGCCTTGAGCTGAAGGAT  
GCCCTGAGTGGCAAGGAGCCGGGGGGGAGCAGGGCTCACTCCAGCCACCTGAAGGCTAAG  
AAGGGGCAGTCTACCTCCCGCCATAAAAAGCTGATGTTCAAGAGAGAGGGACCCGACTCA  
GAC

>Pig\_TP53

ATGGAGGAGTCGCAGTCCGAGCTGGGCGTGGAGCCCCCTCTGAGTCAGGAGACATTTTCA  
GACTTGTGGAAACTGCTTCTGAAAACAACCTGCTGTCTCTGAGCTCTCCCTGGCAGCA  
GTGAACGATCTGCTGCTGTCCCCAGTCACGAACTGGCTGGATGAAAATCCAGATGACGCC  
TCCAGAGTGCCAGCGCCTCCTGCAGCAACAGCGCCCGCACCAGCTGCCCCGACCAGCC  
ACCTCCTGGCCCCTGTCTGCTCTTTGTCCCTTCTCAGAAGACCTACCCTGGCAGCTATGAT  
TTCCGTCTAGGGTTCCTGCATTCTGGAACAGCCAAGTCTGTAACCTGCACGTACTCCCT  
GCCCTCAATAAGCTGTTTTGCCAGCTGGCCAAGACCTGCCCGGTGCAGCTGTGGGTGAGC  
TCGCCACCCCGCCTGGCACCCGTGTCCGCGCCATGGCCATCTACAAGAAGTCAGAGTAC  
ATGACCGAGGTGGTGAGGCGCTGTCCCCACCATGAGCGCAGCTCTGACTATAGCGATGGT  
CTGGCCCCCTCCCAGCATCTCATCCGGGTGGAAGGAATTTACGGGCGGAGTACTTGGAT  
GACAGAAACTTTTTGACACAGCGTTGTGGTGCCTACGAGCCCGCCGAGGTGGCTCT  
GACTGTACCACCATCCACTACAACCTCATGTGTAACAGCTCCTGCATGGGGGGCATGAAC  
CGGCGGCCCATCCTACCATCATCACTGGAAGATGCCAGTGGCAACTTGCTGGGACGG  
AACAGCTTTGAGGTGCGTGTGTGTGCTGTCTGGGAGAGACCGCCGCACAGAGGAAGAA  
AATTTCTCAAGAAGGGCCAATCTTGCCCCGAGCCTCCCCCTGGCAGCACTAAGCGAGCA  
CTGCCACCAGCACCAGCTCCTCGCCAGTGAAAAGAAGAAGCCACTGGATGGCGAGTAT  
TTCACCCTCCAGATCCGTGGGCGTGAACGCTTCGAGATGTTCCGAGAGCTGAATGACGCC  
TTGGAGCTGAAGGATGCCAGACTGCGCGGGAGTCGGGGGAAAACAGGGCCCACTCCAGC  
CACCTGAAGTCTAAGAAGGGGCAGTCTCCCTCCCGCCATAAAAAACCGATGTTCAAGAGA  
GAAGGACCTGACTCAGAC

>Platypus\_TP53

ATGATTTTGATGGTCGCCCTCCCCTGCGTCGGCTTTTCACCCCGTATTCTGGCTCTGTC  
TCCCCCAGTACTCCCCATTGCTCAACAAGCTGTTCTGCCAGTTGGCCCGGACCTGCCCC  
GTCCAGCTGTGGGTGACTCCCCGCCCCCGCGGGGGCCCGGTCCGGGCCATGGCCGTC  
TACAAGAAGACCGACCACAGGGCCGAGGTGGTGAAGAGGTGCCCCACCACGAGCGCTCT  
TCCGACGGTGACGGAGCGGGCGCCCGCCAGCATCTGATCCGCGTGGAGGGGAACCCCCAG  
GCCACATACTTGAATGACGAGAAGACAACCCGTCAGAGCGTCGTCGTCCTACGAGCCA  
CCTCAGATCCGTGGCCGGGAGCGCTACGAAATGTTTCGACAATGAACGAAGCTTTGAG  
TTCAAAGATGCCAAAGGCGGACAGGAACCTGAGGGGACACGCACATGCCGACAGTCCCTG  
AAATCGAAGAGGGAGGCTCCAGGCCCCAGGAAGGGCAAACGGCTGCTTGTCAAAGAAAGA  
GACTCCCAGTCCAAGTACATTTCCCCTGAACTGCCATCCCCACGCGGTCCCCACC  
TCC

>Rabbit\_TP53

ATGGAGGAGTCGCAGTCCGATCTCAGCCTCGAGCCTCCCCTGAGTCAGGAGACGTTTTCA

GACCTGTGGAAACTGCTTCTGAGAACAACCTGCTGACCACCTCGCTGAACCCTCCCGTG  
GATGATCTGCTGTCTGCAGAAGACGTTGCAAACCTGGCTCAACGAAGACCCAGAAGAAGGG  
CTCCGAGTACCAGCAGCTCCTGCACCAGAGGCCCGCCCGAGCTGCCCTGCGCTGGCG  
GCCCTGCACCAGCCACCTCCTGGCCCTGTCATCCTCTGTCCCTTCCAAAAGACCTAC  
CATGGCAACTACGTTTTCCGGCTGGGCTTCTGCACTCTGGGACGGCCAAGTCTGTACC  
TGCACATACTCCCCCTGCCTCAACAAGCTGTTCTGCCAGCTAGCAAAGACCTGCCCTGTG  
CAGCTGTGGGTCGACTCGACGCCCGCCTGGCACCCGCGTCCGGGCCATGGCCATCTAC  
AAGAAGTCTCAGCACATGACGGAAGTTGTAGACGCTGCCCCACCACGAGCGCTGCTCC  
GACAGCGATGGTCTGGCCCCCTCAGCATCTCATCCGGGTGGAGGGAAATCTCCGTGCG  
GAGTATTTGGATGACAGAAACACCTTCCGACACAGCGTGGTGGTGCCTACGAGCCGCC  
GAGTTGGCTCTGACTGTACCACCATCCACTATAATTACATGTGTAACAGCTCCTGCATG  
GGGGCATGAACCGCGGCCATCCTCACCATCATCACACTGGAAGACTCCAGTGGGAAC  
CTGCTGGGACGGAACAGCTTTGAGGTGCGAGTGTGTGCCTGTCTGGGAGGGACCGCCGC  
ACGGAGGAAGAAAATTTCCGCAAGAAAGGGGAGCCCTGCCCTGAACTGCCCCCTGGGAGC  
TCTAAGCGAGCACTGCCACCACCACCGACTCCTCTCCCAGACAAAGAAGAAGCCG  
CTGGATGGAGAATATTTATCCTTAAGATCCGCGGGCGTGAACGGTTCGAGATGTTCCGA  
GAGCTGAACGAGGCCCTGGAGCTAAAGGATGCCAGGCCGAGAAGGAGCCCGGGGGGAGC  
AGGGCTCACTCCAGCTACCTGAAGGCCAAGAAGGGGCAGTCTACCTCCCGCCATAAAAA  
CCAATGTTCAAGAGAGAGGGGCCTGACTCAGAC

>Tetraodon\_TP53

ATGGAAGAGGAAACTTTAGTCTGCCCTTAAGCCAGGACACCTTCCAAGATCTTTGGGAA  
AATGTAGCGGCTCCCTCCATCTCCACCATCAAACAACAGTTTCAGGAAATGAGTGCTGG  
CAGGACGGATCGTTGACTATGGCTCTCATGGACATGCCCTACGATGAGGATCTGTTCAAT  
CTGCCTTCTGAGCTGCCAAACAAGATGGCGCTAACTTCTCCTGCCCCACCGTCCCGGT  
ACCACCGATCACCCGGAGAGTATGACTTCAAGCTGCGTTTTTCAGAAGTCTGGCACGGCA  
AAGTCCGTACCTCCACTACTCCGAGAGCCTCAACAAGCTCTACTGCCAGCTTGCGAAG  
ACCAGTCCGCTGGAAGTGCTCCTGAGCAGGGAGCCTCCGCTGGGGGCCATGCTGAGGGCC  
ACTGCCATTTACAAGAAGACGGAGCACGTGGCAGAAGTGGTGCGCCGGTGCCCCACCAC  
CAGAACGAGGACTCCACGGAGAACCGGAGCCACCTGATCAGGATGGAGGGCAGTCAGCGA  
GCGCAGTACTTCAAGATCCGCACACTAAACGGCAGAGCGTACCGTCCCCTACGAGCCC  
CCTCAGCTCGGGTCCGAATTCACCACCATCCTGCTCAGTTTTATGTGCAATAGTTCATGC  
ATGGGGGGCATGAACCGCCGGCCATCCTCGCCATCTTGACCCTGGAAACTCAAGAGGGT  
GTCGTGTTGGGACGGAGGTGCTTTGAAGTCCGCGTCTGCGCATGTCCGGGCAGAGACCGC  
AAAACCGAGGAGGCCAACAGCACCAAGATGCAGACCGAGACCAAAGATGCCAAAAGCGC  
AAAAGCGCCCCAACGTCTGACAGCACCACCGTGAAGAAGTCCAGGACGGCCTCCAGCGCG  
GAGGAGGATGACAAGGAGGTCTTCACTCTGCAGATTCGTGGTCGCAAACGCTATGAAATG  
ATAAAGAGGATTAATGACGGTCTGGATTTACTTGAAAATAAAAACCAAGTCCAAGACTACT  
TATAAACCCGAGGGTCCCGTCTGCCAAGTGGAAAGAGGCTGATGCACAGAGGAGAGAAG  
AGCGACAGCGAC

>Tilapia\_TP53

ATGGAAGAACAGGGCGTGGAACCGTGAAGCTGCCGCTGAGCCAGGAAAGCTTTCCGGAT  
CTGTGGGCGAACGTGGTGTATGCCGATTAGCACCATTCAGACCGCGGCGCTGAACGAACCG  
ACCGGCAGCTGGGTGGCGAGCCTGACCATGGCGCTGATGGATATGCCGGATCTGAACTGC  
CTGTTTGAAGTGCAGCCGAGCATTAGCACCTGGATACCGGCAGCCCGCCGACCAGCACC

GTGCCGGTGACCACCGATCATCCGGGCGAATATGATTTTAAACTGCGCTTTCAGAAAAGC  
GGCACCGCGAAAAGCGTGACCAGCACCTATAGCGAACTGCTGAACAACTGTATTGCCAG  
CTGGCGAAAACCAGCCCGGTGGAAGTGCTGGTGAGCAAAGAACCGCCGAAAAGGCGCGATT  
CTGCGCGCGACCGCGGTGTATAAAAAAAGCGAACATGTGGCGGAAGCGGTGCGCCGCTGC  
CCGCATCATCAGAACGAAGATAGCGTGGAACATCGCAGCCATCTGATTTCGCGTGGAAGGC  
AGCAGCCAGCGCGCAGTATTTTGAAGATCTGCATACCAAACGCCAGAGCGTGACCGTG  
CCGTATGAACCGCCGAGCTGGGCAGCGAATTTACCACCATTCTGCTGAGCTTTATGTGC  
AACAGCAGCTGCATGGGCGGCATGAACCGCCCGGATTCTGACCATTCTGACCCTGGAA  
ACCCCGGAAGGCTGGTGCTGGGCCGCGCTGCTTTGAAGTGCGCGTGTGCGCGTGCCCG  
GGCCGCGATCGAAAACCGAAGAACAGGCGAACAAAAAAGAAAGCGGCCCGAAACAGACC  
AAAAAACGCAAAGTGACCCGAACACCAGCAGCCTGACCACCCGCGCAAAAAAATGAAA  
AGCAGCAGCAGCGGCGAAGATGAAGATAAAGAAGTGTTTCATTTTGAAGTGATGGCCGC  
GAACGCTATGGCCGCTATGAAATGTTTAAAAAATTAACGAAGGCCTGGATCTGGTGAA  
AGCGATGCGGAAAAATATCGCCAGAAAGGCAAAAAAAGATGGCCAGACCCCGGAAGGC  
CCGAAAAAAGGCAAAAACTGCTGGTGAAAGAAGAAAAAAGCGATAGCGAT

>Zebrafish\_TP53

ATGGCGCAAAACGACAGCCAAGAGTTCGCGGAGCTCTGGGAGAAGAATTTGATAAGTATT  
CAGCCCCAGGTGGTGGCTCTTGCTGGGACATCATTATGATGAGGAGTACTTGCCGGGA  
TCGTTTGACCCCAATTTTTTTGAAAATGTGCTTGAAGAACAGCCTCAGCCATCCACTCTC  
CCACCAACATCCACTGTTCCGGAGACAAGCGACTATCCCGCGATCATGGATTTAGGCTC  
AGGTTCCCGCAGTCTGGCACAGCAAATCTGTAACTTGCACTTATTCACCGACCTGAAT  
AAACTCTTCTGTCACTGGCAAAAACTTGCCCCGTTCAAATGGTGGTGGACGTTGCCCT  
CCACAGGGCTCCGTGGTTCGAGCCACTGCCATCTATAAGAAGTCCGAGCATGTGGCTGAA  
GTGGTCCGAGATGCCCCATCATGAGCGAACCCCGATGGAGATAACTTGGCGCCTGCT  
GGTCATTTGATAAGAGTGGAGGGCAATCAGCGAGCAAATTACAGGGAAGATAACATCACT  
TTAAGGCATAGTGTTTTTGTCCCATATGAAGCACACAGCTTGGTGCTGAATGGACAACT  
GTGCTACTAACTACATGTGCAATAGCAGCTGCATGGGGGGGATGAACCGCAGGCCCATC  
CTCACAATCACTCTGGAGACTCAGGAAGGTGAGTTGCTGGGCCGAGGTCTTTTGAG  
GTGCGTGTGTGTCATGTCCAGGCAGAGACAGGAAAAGTGGAGAGCAACTTCAAGAAA  
GACCAAGAGACCAAAACCATGGCCAAAACCACTGGGACCAACGTAGTTTGGTGAAA  
GAATCTTCTTCACTACATTACGACCTGAGGGGAGCAAAAAGGCCAAGGGCTCCAGCAGC  
GATGAGGAGATCTTTACCCTGCAGGTGAGGGGAGGGGAGCGTTATGAAATTTAAAGAAA  
TTGAACGACAGTCTGGAGTTAAGTGTATGGTGCCTGCCTCAGATGCTGAAAAGTATCGT  
CAGAAATTCATGACAAAAAACAAGAGAATCGTGAATCATCTGAGCCCAAACAGGGA  
AAGAAGCTGATGGTGAAGGACGAAGGAAGAAGCGACTCTGAT

>Chinese\_softshell\_turtle\_PPARGC1A

ATGGCGTGGGACATGTGCAACCAGGACTCTGTATGGAGTGATATAGAGTGTGCTGCTCTG  
GTTGGTGAAGACCAGCCTCTTTGCCAGATCTCCAGAAGTGGACCTCTCTGAACTAGAT  
GTGAATGATTTGGATGCAGACGGTTTTCTGGGAGGACTCAAGTGGTACAGCGACCAATCA  
GAAATCATTACTAATCAGTACAGCAATGAATCATCAAATATATTTGAGAAGATAGATGAA  
GAGAATGAAGCAAAGTGTAGCAGTTCTACAGAGACTGGACAGTATCCCTGTGGAT  
GAGGATGGATTGCCTTCATTTGATACTGACAGATGGAGATGTGACCAATGAAAATGAT  
GCTAGCCCTTTGCCAATGCCGACGGCACCCCTCCGACTCAGGAGGCAGAAGAGCCGTCT  
CTACTTAAGAAGCTCTTGCTGGCTCCAGCCAACATTCAGCTAAATTACAATGAATGCAGT

GGTCTCAGCACACAAAACCATGCAAACACTAATCACAGGATCAGAACAAGCCCTGTGGTT  
GTTAAGACCGAGAATTCATGGAGCAATAAACCGAAGAGCATTGTCAACAGCAAAAAGCCA  
CAAAGACGTCCCTGCTCTGAGCTTCTCAAGTATCTGACTACAAATGATGACCCTCCTCAG  
ACCAAACCCACAGAGAACAGGAACAGCAGTAAAGACAAATGCATCTCCAAAAAGAAGCCC  
CATCTGCAGTCTCAGGCACATCATTTGCAAGCCAAACCAACAAGTTTATCACTTCCTTTG  
ACACCTGAGTCACCAAATGATCCCAAGGGTTCCTCATTTGAGAACAAGACTATTGAACAA  
ACCTTAAGTGTGGAACCTCTGGAAGTGCAGGCCTAACTCCACCTACAACCCCTCCTCAC  
AAAGCCAACCAAGATAATCCTTTCAGAACTTACCCAAACTGAAGTCATCATGCAAGACT  
GTTGTACCACCTTAAAAAGCCCCGCTACAGTGAATCTCCAGTTCTCAAGGAAATAAT  
ACAATCAAGAAGAGTCCAGAACAATCTGAGCTGTATGCACAGCTTAGCAAGACAACAGTC  
CTGTCCAGTGGCCATGAGGAGAGAAAGACAAAACGGCCAAATTTGCGGCTTTTTGGTGAC  
CATGACTACTGTCAATCTGTGAATTCGAAAACCTGAAATACATATTAATAATATCGCAGGAA  
CTTCAGGACTCTGGACAACAAGAATTTAAAGATTCTTCATCTGTGTGGCAGTGTGAGATT  
TGTTTCGCTTTTGAACAAGACCAGTATTACAAGAGAGACACTTTACAGGCAAGTAAGCAG  
GGTTCCTGTCTAACAGCCGAAAACAGCTCCAAGATCAGGAGATCCGGGCTGAACTGAAT  
AAGCACTTTGGTCACCCAGCCAAGCTGTTTTTGTGATGAAGAGGCAGATAAGGCCAGTGAA  
TTGAGGGACAGTGATTATAGCAATGAACAATTCTCCAACTACCTATGTTTATAACGTCG  
GGACTAGCTATGGATGGCCTCTTTGATGACAGTGAAGATGAAAGTGATAAACTATGCTAC  
CCTTGGGATGGGACACAAGCCTATTCATTGTTTGTGATGATCGCCTTCTTGCTCTTCTTTT  
AATTCTCCATGCAGAGATTCATTGTCTCCACCCAAATCCTTATTTTCTCAAAGATCCCAA  
AGGATGCGCTCTAGATCAAGGTCTTTCCTCAACACAGGTCTTGTTCCTGTTCTCCATAT  
TCCCGATCGAGATCAAGGTCGCCATGTAGCAGATCCTTCCAGATCTTGTACTATTAT  
GAGTCCAGCCACTGCAGACACCAAGCATAACAGAAGTTCTCCTTTATATGCAAGATCACGA  
TCCAGATCACCATATAGTTGTAGACCCAGATATGACAACCTATGAAGAATATCAGCATGAA  
AGACTGAAGAGGGAAGAATACCGCAAAGAGTATGAAAAACGGGAATCTGAAAGGGCCAAA  
CAAAGGGAGAGGCAGAGACAAAAGCAATTGAGGAACGTCGTGTGATTTTTGTGGGTAA  
ATCAGAGCTGATACCACCCGAACAGAAGTGAAGGATCGGTTTGAAGTTTTTGGTGAAATT  
GAAGAGTGCACAGTCAATCTGCGGGATGATGGAGACAGCTATGGTTTCATCACCTACCGC  
TATACTTGTGATGCGTTTGCTGCTCTCGAAAATGGATACACTTTACGCAGGTCAAATGAA  
CCTGACTTTGAGTTGTACTTTTGTGGACGCAAGCAATTTTGAAGTCTAACTATGCAGAC  
CTAGACTCAAACCTCAGATGATTTTGTCTGCTTCCACCAAGAGCAAATATGACTCCATG  
GATTTTGTAGTTTACTTAAAGAGGCACAGCGAAGCCTGCGTAGG

>Cod\_PPARGC1A

TTCTGCTTCCGTTTCGTCGTACCGACGACCGATGGACGGACTTGCAGTGTGCTGCCTTG  
GTGGGCGAGGACCAGCCCCTGTCCCCGACCTCCCGAACTCGACCTATCAGAGCTGGAC  
GTCAGCGACCTCGACGCTGACAGCTTCTGCGGGGCTCAAGTGGTACAGCGACCAATCG  
GATATCATTTGACGACGAGTACGGCAACGAAGCGTCCAATCTGTTTGAAGAAGATAGATGAG  
GAGAATGAGGCCAACCTGCTGGCGGTGCTCACAGAGACTCTGGACAGCATCCCGGTGGAC  
GAGGACGGCCTGCCGTCCTTCGAGGCCCTGGCAGATGGGGAGGTGACCAATGCCAGCGAC  
CGGAGCTGCCCCTCGTACCCGGAGGGCTCGCCGCGCAGCCCCGAGCCCGAGGAGCCGTCT  
CTGCTGAAGAAGCTTCTTCTGGCTCCAGCAAACCTCCAGCTCAGCTATAATCAATACACA  
GCTGTGAAGGCCAGGACCATGCAGCCGGCACCAACCACCGCATCCGAACACCACCTGCT  
GTCGTCAAGGTAGGAAATGACACAATTGCCATCGTACATATACTTATAAATATTTACGAG  
CAGGTCCGTATGAGATGGCGCTCTTTTTGTCTTTTCTTACTCCTAACTCTGATTCTCTA





ACCCAGAGTCACCAAATGACCCCAAGGGTCCCATTTGAGAACAAGACTATTGAACGA  
ACCTTAAGTGTGGA ACTCTCTGGA ACTGCAGGCCTAACTCCACCCACA ACTCCTCCTCAT  
AAAGCCAACCAAGATAACCCCTTCAGGGCTTCTCAAAGCTGAAGCCCTTTGCAAGACT  
GTGGTACCTCCACCATCCAAGAAGGCCGGTACAGTGAGTCTTCTGTACCCAAGGCAGT  
AATTCCACCAAGAAGGGGCCGAGCAGTCTGAGTTGTACGCACAGCTCAGCAAGACCTCT  
GTGCTCACCAGTGGACACGAGGAAAGGAAGGCCAAACGGCCAGTCTCCGGCTGTTTGGT  
GACCATGACTATTGTCAGTCAATTAATTCCAAAACGGAATACTCGTTAGTACATCACAG  
GAGCTCCATGACTCCAGACA ACTAGAAAATAAAGATGCCCCCTCTCCAACGGGCCGGGG  
CAAATACACTCTTCCACAGATTCGACCCGTGCTACCTGAGAGAGACCGCGGAGGTGAGC  
AGGCAGGTCTCTCCGGCAGCACCAGAAAACAGCTCCAAGACCAGGAAATCCGAGCTGAG  
CTGAATAAGCACTTCGGTCATCCCAGTCAAGCTGTTTTTGACGACAAAGCAGACAAGACC  
AGTGA ACTGAGGGACAGTGATTT CAGTAATGAACAATTCTCCAACTACCTATGTTTATA  
AATTCAGGACTAGCCATGGATGGCCTGTTTGATGACAGCGAAGATGAAAGTGATAA ACTG  
AACTCCCCTTGGGATGGCACGCAGTCTATT CATTGTTTCGATGTGTCGCCTTCTTGTCT  
TCTTTAACTCTCCGTGTAGAGATTCTGTGTCACCACCCAAATCTTTATTTTCTCAAAGA  
CCCCAAAGGATGCGCTCTCGTTCAAGGTCTTTTCTCGACACAGGTCGTGTTCTCGATCA  
CCATATTCAGGTCAAGATCAAGGTCCCCAGGCAGTAGATCTTCTTCAAGATCTTGCTAC  
TACTATGAGTCAGGCCACTGCAGACACCGCACACACCGAAATTCGCCCTGTGCGCGTCA  
CGTTCAAGATCGCCCCATAGCCGGCGGCCAGGTATGACAGCTACGAGGAGTACCAGCAC  
GAAAGGCTCAAGAGGGAAGAATACCGCAGAGAGTATGAGAAGCGGGAATCCGAAAGGGCC  
AAGCAGAGGGAGAGGCAGAGGCAGAAGGCAATTGAAGAGCGCCGTGTGATTTATGTTGGG  
AAAATCAGGCCTGACACAACACGGACAGA ACTGAGGGACCGTTTTGAAGTTTTTGGTGAA  
ATTGAGGAGTGACAGTAAATCTGCGGGATGATGGAGACAGCTATGGTTTCATTACCTAC  
CGTTATACCTGTGATGCTTTTGTGCTCTTGAAAATGGATACACTTTGCGCAGGTGCAAT  
GAAACTGACTTCGAGCTGTACTTTTGTGGACGCAAGCAATTTTCAAGTCTAACTATGCA  
GACCTAGATTCAAATTCAGATGACTTTGACCCTGCTTGCATCAAGAGCAAGTATGACTCT  
CTGGATTTGATAGTTTACTGAAAGAAGCCAGAGAAGCTTACGCAGGAATCTGGGTGGG  
AGAGGATGCTGCAGGCACCGAATGCTCAACTTTCCTAACATTTTGAAGTTTCTG

>Dog\_PPARGC1A

ATGGCGTGGGACATGTGCAACCAGGACTCTGTATGGAGTGACATCGAGTGTGCTGCTCTG  
GTTGGTGAAGACCAGCCTCTTTGCCAGATCTTCTGAACTTGACCTTTCTGAACTAGAC  
GTGAACGACTTGGATACAGACAGCTTTCTGGGTGGACTCAAGTGGTGCAGTGACCAATCA  
GAAATAATATCCAATCAGTACAACAATGAGCCTTCAAACATATTTGAGAAGATAGATGAA  
GAGAACGAGGCCAACTTGCTAGCCGTCTCACAGAGACACTGGACAGTCTCCCGTGGAT  
GAAGACGGATTGCCCTCATTGATGCACTGACAGATGGAGATGTGACCACTGAGAATGAG  
GCCAGTCTTCTCCGTGCTGACGGCACCCCTCCACCGCAGGAGGCCGAAGAGCCGTCT  
CTACTTAAGAAGCTTACTGGCACCAGCCAACACTCAGCTAAGTTATAATGAATGCAGT  
GGTCTCAGTACCCAGAACCATGCAAACCATAATCACAGGATCAGAACAACCCTGCAGTT  
GTTAAGACCGAGAATTCATGGAGCAATAAAGCGAAGAGCATTGTCAACAGCAAAAGCCA  
CAAAGACGTCCCTGCTCGGAGCTTCTCAAGTATCTGACCACAAATGATGACCCGCCTCAC  
ACCAAACCCACAGAGAACAGGAACAGTAGCAGAGACAAATGCACCTCCAAAAGAAGTCC  
CACACACAATCGCAGTCTCAACATTTGCAAGCCAAACCAACA ACTTTATCTTCTCCTCTG  
ACCCAGAGTCACCAAATGACCCCAAGGGTCCCATTTGAGAACAAGACTATTGAACGA  
ACCTTAAGTGTGGA ACTCTCTGGA ACTGCAGGCCTAACTCCACCCACA ACTCCTCCTCAT

AAAGCCAACCAAGATAACCCTTTCAGGACTTCTCCGAAGCTGAAGTCCTCTTGCAAGACT  
GTGGTACCTCCGCCATCGAAGAAGCCCCGGTACAGTGAGCCTTCTGGCACCCAAGGCAAT  
ACCTCCACCAAGAAAGGGCCCCGAGCAGTCTGAGTTGTACGCACAACCTAGCAAGACCTCA  
GTGCTCACCAGTGGACACGAGGAAAGGAAGCCAAGCGGCCAGCCTACGGCTGTTTGGT  
GACCATGACTACTGTCAGTCAATTAATTCAAAACGGAAATACTCATTAAATATATCACAG  
GAGCTCCAAGACTCTAGACAAC TAGAATATAAAGATGCCTCCTCCGATTGGCAGGGGCGAG  
ATTTGTTCTTCCACAGATT CAGACCAGTGCTACCTGAGAGAGACTTCGGGGGCGGGCAAG  
CAGGTCTCTCCTTGCAGCACCAGAAAACAGCTCCAAGACCAGGAAATCCGAGCCGAGCTG  
AACAAAGCACTTCGGTCATCCCAGTCAAGCTGTTTTTGACGACGAAGCAGACAAGACCAGT  
GAACTGAGGAACAGTGATTT CAGTAATGAACAATTCTCCAACTACCTATGTTTATCAAT  
TCAGGACTAGCCATGGATGGCCTGTTTGATGACAGCGAAGATGAAAGTGATAAACTGAAC  
TACCCTGGGATGGCACGCAATCCTATT CATTGTTGATGTGTCGCCTTCTTGCTCTTCC  
TTAACTCTCCATGTAGAGATTCCGTGTCACCACCCAAATCCTTATTGCTCAAAGACCC  
CAAAGGATGCGCTCGGTTCAAGATCCTTTTCTCGACACAGGTCGTGTTCCCGATCACCA  
TATTCCAGGTCAAGATCAAGGTCCCAGGCAGTAGATCGTCTTCAAGATCTTGCTACCAC  
TACGAGTCGAGCCACTGCAGACACCGCGCGCACCGAAATTCTCCCCTGTGTGCAAGATCA  
CGTTCCAGGTGCCCTACAGCCGTCGGCCCAGGTATGACAGCTACGAGGAGTATCAGCAC  
GAGAGGCTGAAGAGGGAAGAGTACCGCAGAGAGTATGAGAAGCGGGAGTCTGAGAGGGCC  
AAGCAAAGGGAGAGGCAGAGGCAGAAGGCAATTGAAGAACGCCGTGTGATTTATGTTGGT  
AAAATCAGACCTGACACAACACGGACGGAAGT GAGGGACCGTTTTGAAGTTTTTGGTGAA  
ATTGAGGAGTGACAGTAAATCTGCGGGATGATGGAGACAGCTATGGTTTCATTACCTAC  
CGTTATACCTGTGATGCTTTTGTGCTCTTGAAAATGGATACACTTTGCGCAGGTGCAAT  
GAAACTGACTTCGAGCTGTACTTTTGTGGACGCAAGCAATTTTCAAGTCTAACTATGCA  
GACCTAGATTCAAACCTCAGATGACTTTGACCCTGCTTCCACCAAGAGCAAGTATGACTCT  
CTGGATTTGATAGTTTACTGAAAGAAGCTCAGAGAAGCTTGCGCAGG

>Dolphin\_PPARGC1A

ATGGCGTGGGACATGTGCAACCAGGACTCTGTATGGAGTGACATCGAGTGTGCTGCTCTG  
GTTGGTGAAGACCAGCCTCTTTGCCAGATCTTCTGAACTTGACCTTTCTGAACTAGAC  
GTGAACGACTTGGATACAGACAGCTTTCTGGGTGGACTCAAGTGGTGCAGTGACCAGTCA  
GAAATAATATCCAATCAGTACAACAATGAGCCTTCAAACATATTTGAGAAGATAGATGAA  
GAGAATGAGGCAAACCTTGCTAGCAGTCTCACAGAGACACTGGACAGTCTCCCTGTGGAT  
GAAGACGGATTACCCTCATTTGATGCACTGACAGATGGAGATGTGACCACCGAGAATGAG  
GCTAGTCCTTCTCCATGCCTGATGGCACCCCTCCGCCTCAGGAGACAGAAGAGCCGTCT  
CTGCTTAAGAAGCTCTTACTGGCACCAGCCAACACTCAGCTAAGTTATAATGAATGCAGT  
GGCCTCAGTACCCACAACCATGCAAACCATAATCACAGGATCAGAACAACCCCTGCAGTT  
GTTAAGACCGAGAATTCATGGAGCAATAAAGCGAAGAGCATTGTCAACAGCAAAAGCCA  
CAAAGGCGTCCCTGCTCGGAGCTTCTCAAGTATCTGACCACAAATGATGACCCTCCTCAC  
ACCAAACCCACAGAGACCCGGAACAGCAGCAGAGACAAATGCACCTCCAAAAGAAGGTC  
CACACACAATCTCAGTACAACATTTACAAGCCAAACCAACAACCTTTATCTTCTCCTCTG  
ACCCAGAGTACCAAATGACCCCAAGGGTCCCCATTTGAGAACAAGACTATTGAACGA  
ACCTTAAGTGTGGAACCTCTGGAAGTGCAGGCCTAACTCCACCCACAACCTCCTCAT  
AAAGGCAACCAAGATAACCCTTTTAGGGCTTCTCAAAGCTGAAGCCCTCTTGCAAGACT  
GTGGTACCTCCGCCATCAAAGAAGCCCCGGTACAGTGAGTCTCCGGTATCCAAGACAAT  
AACTCCACCAGGAAAGGGCCCCGAGCAGTCTGAGTTGTACGCACAGCTCAGCAAGACCTCC

GTGCTACCAGTGGACACGAGGAAAGGAAGGCCAAGCGGCCAGTCTGCGGCTGTTTGGT  
GACCATGACTATTGTCAGTCAATTAATTCAAAACGGAAATACTCATTAAATATATCACAG  
GAGCTCCACGACTCCAGACAAGTATAAAGATGCCTCCTCCAAGTGGCAGGGGCGAG  
ATGCGCTCTCCACAGATTGACAGGAGTACCCGAGAGAGGCCTCGGGGGTGAGCAGG  
CAGGTCTCTCCCGCAGCACCAGAAAACAGCTCCAAGACCAGGAAATCCGAGCTGAGCTG  
AAACAGCACTTCGGTCATCCAGTCAAGCTGTTTTGACGACGAAGCAGACAAGACCAGT  
GAACTGAGGGACAGTGATTCAGTAATGAACAATTCTCCAAGTACCTATGTTTATAAAT  
TCAGGACTAGCCATGGATGGCCTGTTTATGACAGCGAGGATGAAAGTGATAAACTGAAG  
TCCCCTGGGATGGCACGCAGTCTATTGTTCCATGTGTCGCCTTCTGTTCTTCT  
TTTAACTCTCCATGTAGAGATTCCGTGTCACCACCCAAATCCTTATTTTCTCAAAGACCC  
CAAAGGATGCGCTCTCGTTCACGGTCTTTTCTCGACATAGGTCGTGTTCTCGATACCA  
TATCCAGGTCAAGATCAAGGTCCCAGGCAGTAGATCCTCTTCAAGATCTTGCTACTAC  
TATGAGTCAGGCCACTGCAGACACCGCGCGCACCGAAATTCTCCCCTGTGCGCGAGATCA  
CGTTCAAGNNNNNNNNNNNNNNNNNNNNNNNGTATGACAGCTACGAAGAGTATCAGCAC  
GAGAGGCTGAAGAGGGAAGAATACCGCAGAGAGTATGAGAAACGGGAGTCTGAAAGGGCC  
AAACAGAGAGAGAGGCAAAGGCAGAAGGCAATTGAAGAACGCCGTGTGATTTATGTTGGT  
AAAATCAGACCTGACACAACACGGACAGAAGTGGAGGACCGTTTTGAAGTTTTTGGTGAA  
ATTGAGGAGTGACAGTAAATCTGCGGGATGATGGAGACAGCTATGGTTTCATTACCTAC  
CGTTATACCTGTGATGCTTTTGTGCTCTTGAAAATGGATATACTTTGCGCAGGTCAAT  
GAAACTGACTTCGAGCTGTACTTTTGTGGACGCAAGCAGTTTTTCAAGTCTAACTATGCA  
GACCTAGATTCAAAGTCAAGTACTTTGACCCTGCTTCCACCAAGAGCAAGTATGACTCT  
CTGGATTTGATAGTTTACTGAAAGAAGCCAGAGAAGCTTGCGCAGG

>Duck\_PPARGC1A

ATGGCGTGGGACATGTGCAGCCAGGACTCTGCATGGAGTGACATCGAGTGTGCTGCTCTG  
GTTGGCGAAGACCAGCCTCTTTGCCAGATCTCCAGAACTTGACCTCTCCGAAGTAGAC  
GTGAACGACCTGGACACGGACAGCTTTCTGGGGGGCTCAAGTGGTACAGCGACCAGTCA  
GAGATCATCTCAAACAGTACAGCAATGAACCCGCCAATATATTCGAGAAAATAGATGAA  
GAGAATGAGGCGAACTTGCTAGCAGTTCTCACTGAGACACTGGACAGCATCCCCGTGGAT  
GAGGATGGATTGCCTTCAATTTGATGCACTGACAGATGGAGATGTGACCAATGAAAATGAC  
GCTAGCCCTTCCCAATGCCCGACGGCACCCCTCCAACCCAGGAGGCAGAAGAGCCGTCT  
CTACTTAAAGAAGCTCTTGCTGGCTCCAGCCAACACTCAGCTAAATTACAATGAATGCAGT  
GGTCTCAGCACACAAAACCATGCAAACACAAATCACAGGATCAGAACAAGCCCTGTGGTT  
GTTAAGACTGAGAATTCATGGAGCAATAAAGCAAAGAGCATTGTCAACAGCAAAGGCCA  
CAAAGACGTCCCTGCTCTGAACTTCTCAAATATCTGACTACAAATGATGACCCTCTCAG  
ACCAAACCAGCAGAGAACAGGAACAGCAGCAAAGAGAAATGCACCTCCAAAAGGAAGCCC  
CATCTGCAGTCTCAGACAAATCACCTGCAAGCCAAACCAACAAGTTTATCACTTCCGTTG  
ACGCCCCGAGTACCAAATGATCCCAAGGTTCCCCATTTGAGAACAAGACTATTGAACAA  
ACCTTAAGTGTGGAACCTCTGGAAGTGCAGGCCTAACTCCACCTACAACCCCTCCTCAT  
AAAGCCAACCAGGATAATCCTTTTAGGACTTACCTAAGCCGAAGTCATCATGCAAGACT  
GTTGTACCACCTTCAAAAAAGCCCCGCTATAGTGAGTCTTCTGTTTCTCAAGGAAACAAC  
CCGATCAAGAAGGGTCCAGAACAGTCTGAGCTGTATGCACAGCTTAGCAAGACTACAGTA  
CCGTCCAGTGGACATGAGGAGAGAAAGACAAAACGGCCAGTTTTCGGCTGTTTGGTGAC  
CATGACTACTGTCAATCTGTGAATTCAAAATCGAAATACACATTAATAATATCCCAGGAA  
CTTCAGGACTCCAGACAAGTAAATTAAGGATTCTTACCTGGGTGGCAGTGTGAGATT

TGTTCTTCTTTAGAACAAGACCAGTATTTCAAGAAAGAGACTTTACAGACAAGTCAGCAG  
GGATCCCTCAGTAATAACAGAAAACAGCTCCAAGACCAGGAAATTCGGGCTGAACTGAAT  
AAGCATTTTGGTCACCCAGCCAAGCTGTTTTTGTATGAAGAAGCAGATAAGACCAGTGAA  
CTAAGGGACAGTGATTACAGTAATGAACAATTTCCAAACTACCTATGTTTATAAATTCA  
GGACTAGCAATGGATGGTCTCTTTGATGACAGTGAAGATGAAAGTGATAAACTATGCTAC  
CCTTGGGATGGGACACAAGCCTATTCAATTATTTGATGTATCGCCTTCTTGCTCTCTTTT  
AACTCTCCATGCAGAGATTCAGTGTCTCCACCCAAATCCTTATTTTCTCAAAGATCCCAA  
AGGACACGCTCTAGATCAAGGTCCTTTCCTCAACGCAGGTCTTGTCCCGTTCTCCATAT  
TCCCGATCGAGATCAAGGTCGCCCTGTAGTAGATCCTCTTCAAGATCTTGCTACTGTTAT  
GAGTCCAGCCACTGCAGACACCGAGCATAAGTTCCTCCCTTACGTGCAAGATCGCGA  
TCCAGATCACCGTACAGTCGAGACCCAGATATGACAGCTATGAGGAATATCAGCATGAA  
AGGCTGAAGAGGGAAGAATACCGCAAAGAGTATGAAAAACGGGAATCTGAAAGGGCCAAA  
CAAAGAGAGAGACAGAGGCAAAAAGCAATTGAAGAACGTGCTGTGATTTATGTGAGTAA  
ATCAGACCTGACACAACCCGAACAGAAGTGAAGGACCGGTTTGAAGTTTTTGGTGAATC  
GAGGAGTGCACAGTAAATTTGCAGGATGATGGAGACAGCTATGGTTTCATCACCTACCGC  
TACACTTGTGATGCCTTTGCTGCTCTTGAGAATGGATACACTTTACGCAGGTCAAATGAA  
CCTGACTTTGAGCTGTACTTTTGTGGACGCAAGCAATTTGCAAGTCTAACTATGCAGAC  
CTAGATCAAACCTCAGATGATTTTGTCTGCTTCCACTAAAAGCAAGTATGACTCCATG  
GATTTTGTAGTTTACTTAAAGAGGCACAGCGGAGCCTGCGCAGG

>tropical\_clawed\_frog\_PPARGC1A

ATGGCGTGGGACATGTGCAACCAGGACTCTGTATGGAGTGACATAGAGTGTGCTGCTCTG  
GTCGGTGAAGACCAGCCTCTCTGCCCGATCTTCTGAACTTGATCTCTCTGAACTTGAT  
GTCAATGACTTAGATGCAGACAGCTTTTTGGGTGGATTAAGTGGTACAGTGACCAATCA  
GAAAACATTTCCAATCAGTACAGCAGCGAATCGTCCAACATATTTGAGAAGATAGACGAG  
GAGAATGAAGAGAATTTGCTAGCAGTCTTACAGAGACATTGGACAGTCTCCCTGTGGAT  
GAGGATGGATTGCCTTCAATTTGATGCACTGACAGATGGAGATGTGACCAATGAACATGAT  
CCTAGCCTTTCATCTATGCCTGACGGCACCCCTCCAACCTCAGGAGGCAGAAGAGCCGTCA  
CTACTTAAGAAGCTGTTGCTGGCCCCAGCTAACGCTCAGCTGATTTACAATGAATGCATT  
GGGTTCACTACACAGAACCATGCCAGCCCCAGTCAGAGGATCAGAATAATTCTGCGGTT  
GTTAAGACCGAGAATTCATGGAGCAATAAACCGAAGACCATTTGCACTCGCAAAAGCCA  
CCGCGGCGTCTTGTCTCAGAGCTCCTTAAGTACCTGACTTCAAATGACGACCCTCCTCAG  
ACCAAATCGACAGAGAGCAGGAACAGCAGGCTTGACAAATGCAGCAGCAAAAAGAAGCCG  
TACTTACAGCCTCAGCCACATTATCAAGCCAGGGCAACGAGTTTGTGCTTCCCTTGACG  
CCCAGTCAACCAATGATCCAAAAGAATGTCTTTTATAAGGAAATTTTCTCAAGACCTT  
CTGTTTGTGGAATTTTTTTTTGTTATAGGATTAACCTCACCTACAACACCTCCTCACAAA  
GCCAATCAAGAGAACCCCTCAGGACCTCACCTAAGCTGAAATCTTGCAAAATCTTCTGTG  
CCACCTGCTAAAAAATCTCGCTACATTGAGTCTTCCAGTATCCAAGTTCTCTATCCAGCT  
AAGAAAGGTCCAGAGCAATCAGAAGTACGCACAGCTCAGTAAAGCGACTGTGGTAATT  
GGACAAGAGGAGAAAAAGCTAAGCGACCTAGTTTACGACTTTTGGAGACCACGACTAC  
TGTCAGTTTATGAATTCAAAATCTGAAATACATATTAGCTTATCACAAGAATTACAGGCC  
TCAAGACATCTTGAATGTAAGGATCCTTTGCCTGGCAAAGAAGTAAAGTCTGTTTCATAC  
ACTGATCAAGAGCAATGCCAGAAAGACAGCTTACCAGTCACAATGCCAAGTTCTCAGAAC  
AGCCATAGGAAACAGCTCCAGGACCAGGAAATACGCGCTGAACTCAACAAGCACTTTGGG  
CACCCAACGCAGGCAGTCTACAACGATGAAACTAAAATCAGTGAAGTGGTGGACAATAAA

TATAGCGATGAACAGTTGTCAAGACTACCTATGTTTCTAACTGCTGGGTTGGAAATAGAT  
AGTTTGTGGATGACAGCGAGGACGAAAATGATAAACTGTGCTATACTTGGGATGAAACA  
CAGTCATATTCATTATTTGATGAATCGCCGCTTGTCTACTTTTAATTCTCCGAGTAGA  
TATTCAGTATCCCCACCAACATCCCTGTTTTACAAAAGGATATGCTCTAGATCAAGATCT  
AGGTCCTTTTACAGTTTAGATCGTCTTCTCTTTCCCATATTCTCGTTCAAGATCCAGA  
TCTCCATCAAGCAGATCATCATCAGGGTCTTGTGCTGCTATGAGACTGATCATTGCAGA  
GAAAAAACTTCTCCAATGTATGCACGATCACGGTCAAGGTCGCCATATGGTCGTAGGCC  
AGATATGACAGCTATGAGGAATACCAACATGAACGGCTGAAGAGGGAGGAGTACCGCAAG  
GAGTATGAAAAGCGGGAATCAGAGAGAGCAAAAACAAAGAGAGAGACAAAGGCAAAAAGCC  
ATTGAAGAACATAGAGTGATATTCGTGGGTAATAAGAGACCTAACATGAGCCGCGCAGAG  
CTGCGTGCCCGTTTTGAAGTTTTGGAGAAATTGAGGAATGCACAGTAAATCTGCGGGAC  
GATGGCAATTGTTACGGATTCATCACCTATCGCTACACCTGTGACGCTTTTGCTGCTCTT  
GAAAATGGATACACGCTGCGCAGGTCAAATGAGCCAGACTTCGAGGTTTGCTTTTGTGAA  
AGAAAGCAGGTTTGAAGTCCAATATGCAGACTTAGATTCAAATTCAGATGACTTTGAT  
CCTGCTCCACAAAAGCAAATATGACTCCATGGATTTTGACAGTTTGCTCAAGGAGGCA  
CAGAGAAGCCTGCGTAGG

>Fruitfly\_PPARGC1A

ATGGATTCACGAATGCTAAATGTGTTCCAAGGAGATACCTTTGAGGCAAATTATACAAA  
TACGAGTCTGAGCCGATATTCTGGTCATCTAATGATGAACTGCAACTGACAGATACTG  
AGCGGCATCCTACCATCGCGCCACAGACGAATCACTGCTCAACCATAACCGGGAGGAA  
GATCTGCAAAACAGAAAGAATCTGCTGATTTACAACGACTTCTGAAACAGGAGCTCAGC  
AACCATGATGCCAATGAGCTAAATGCCAGGTCTATCGGTCCATCGCCGACAGCGGGGC  
GAGATTGCCTATGAGCAGCAGCGCCAGATCAGCGCCATTGTGGAGTACGACAAAGAAGAT  
ATAAAATCGACGGCCTTACGGAGGAGGAGGACATACAAAGCCAGTCCACATTTGCGACC  
CGCACAGACAGCTCTTTCGATTGGTGACTATGAATCGCACTCTAGCGACTATGATGATGAA  
TTTGACATTGTCAACGAAGAAAAAAGTCCAAGGCTGCAGGTTGTCCATAACAATATCGGC  
AACTTGCAGAGCTCCTGTGAGCGCAAGGGACGGACGCTCAGTACTAACACTATTATCTCC  
GAAGTAGACGATTGGGGCTAAGTATTGATGTTAATAACTTTGACCTAGCTGATTTTATT  
ACCAAAGACGATTTTGCTGAGAATTTAAACGCCTGTCGCAAAAAGGAATCTCTGCAAGCA  
CAGGCGCAAATTAATCTAATACTTTAGCAGATGTTCCCATACTTCTTAATCCACCGGTT  
GCCACAATTGTGGCAAACCCGGGGTCCCATCCTCTAAACCTGGCGATTCTGATTATGAC  
TCTGACTCGATTATCGACGTTGAACTGTGATGTACTCGATATGAATATGGCCAATATC  
TGGTCAATAGATAAGCCGGCAAAAATGGGCCAAAACCTCCCGATGAATTACGCTATGTGGAC  
AATGTAAAGGCCGATCCCTTGGAGTCCGAGATCCGCAAAAAGACCACACCTACTATC  
AAAGAGAATAAGCCGGAACAACCTGGGGAACCATCAGCTCGCGGTCCCAGCATCAAACAAA  
CCGAAGCATAAGAATTTGCTGCTGCTAATAAAAAACAGTGCGATTTTCTTAAACGT  
AAGTTGGTAGTCCCTCCTGTCCAAGCTAACTAAGGCGACAACAAAAAAGCGACTGAG  
TCTATGAGCAACAAGCAGCCGTCAGTAAAAATACTCAATGCACGGGTCTCGGATTGGGT  
GGAAAAACCTTTGCTTCTGAAGCAGGAGAGGGACGCCGATTATCGGTGTGTGCTGCA  
AAACCTATAGCACCTCCAACCTTTGACACAACCCCGACTTTGACACCGCCAGCAAAG  
CGAAAGCTAAATCTAGAGGAATATAAACAGCGTCTGTTGTGGCGGTGTGGGGGCTGTGTAT  
CCTAAACCAACTCCGCCAAGCAGGCGAAAATAGAGGTTGCCGCCAAACGCATTGCTCCT  
ACCCCGGTTTCAAACCAACACCTTACCAAAAAAAGCGGAAATAGTCAATATTGTAAAC  
AGCCTTAAATGTCTCGCACAGAACAATCTTCTTTGCCATGGATCCCATACCATGGCC

AAGAACAAGGTGCTGCGTATGCTAGAGATGAAACGTGCCCAACAGCTAAAAATAATCGAT  
TCCCGCGTATCAGCCAAGGTGCCACGCGTAACCAAGCTGCCGCCACTTAAGGATATTGTA  
AAGGACACCTACTGCATGAAAAGTGGAGGATCTGGCACAGAGATAGCGCCACTCAGCAAC  
AAACTCCACCCGGACTATGAGGAGATTATAATAGTTTCAGCTAGTTGCAATACAGACATA  
ACAATACCTCCCAATCAATTAAGCAAGGCCTCCCCTCGCTCTCTCTTAAAGTCATCAGTT  
TTGCTGTACAACATCTCAAACGGCCAGGATGCCAATAAGAACATGAGCAACTCCCTAATA  
GCCAGCATCCAAAGCGAGGTGCCAGGCAAACGAGTAACACTACTCTCTCGACGATACAG  
TCCAACGCAACAAAAGTTATGTCTTCCGCTGATAAGAATTGTCAGCATGGCGAGGACATG  
GTCATCATGCACTTACCCAAGGATCGGGTGCGAAAACTCTTGTGAGCATTGCAACCCAA  
ACTGATCTGCAACCCGAATTTCCCCTATTGACGCTGCCCCAAAGCGACAGTCTCGAGAG  
CGTACGCGTCGAAATTATCGCAGGCGACGGACACAAGGCTCGGGCTCAAATATGTCCACT  
TCTTCGAGTGACTTTTCTCCGACTGCAGCAGCTTGGTGTACACAGATCTCGCTCACAA  
TACGATTGATTGATCAGCTGCGTAACTTAGATGTAGCAGCCACGTGTGGGGGCGAGTATT  
GGAAACGGCGGTTATTCTTCTCGTAGCACTCAACGCCATCGCAGCTCGGTGAGTTCTTCA  
TCTTACTCAGAGAATGGACAGTACAGGCGCAGGCAGCGCCGACGAGTTACAACAAGCGT  
AGATCTAGAAACAAAAGCGGGGCGAGTACTTCTCGTCATGCTCGGGCTCCGAAAAAGC  
GATCGCGAACGTAGCCGAGCCACACAGAAAATTGCGCCACTCGCGGTCCCGGTGCGCGC  
TCAAATCTGATACACGCTACCCTAACAACTCCTCCTCCAATAACAACAATCGGCGA  
GGATTTTTGATCGTAACGTGTCGCAACCGGCCGTTGAAGAGCGGCGAATCGTCTACGTC  
GGTCGCATTGAGCAAGAAACCAAGGAAATTCTGCGTCGTAAATTTCTGCCCTATGGA  
AGCATTAAACAAATAACAATACTACAAGGAAAATGGAATGAAGTATGGGTTGTTACG  
TACGAAAGAGCGCAGGACGCATTACGGCCATTGACACGAGTCATAGAGACTCGCAAATA  
AGCATGTATGACATAAGTTTTGGAGGAAGACGTGCCTTCTGTCGTTTACCTTACGCTGAC  
TTGGATAATGCTGGCATTAAATAACTCGTATGTGTTTCCAAGGAAGCACCAGCA  
CCGAATGTAGTCGAGGACTCTTTGCAAGCTTTGTTGCTCAGGTAAGGCAAAGTTAAAC  
GCGGGCAAGTACCGGTAGGTTTCTACGCTGGAGGCACCATCAGCTTCCGGTACTGTA  
CTTCAGGGCCACAGTCAGATG

>Fugu\_PPARGC1A

AAGAAGATAGATGAAGAAAATGAGGCCAATTGCTGGCAGTGCTTACAGAGACCCTGGAC  
AGCATCCCGGTGGATGAGGACGGATTGCCTTCGTTTGGAGCCCTGGCAGACGGGGACGTG  
ACCAATGCCAGTGACAGGAGCTGTCCCTCGTCCCCGACGGCTCGCCGCGCACCCCCGAG  
CCCGAGGAGCCGTCCCTGCTGAAGAAGCTCCTTCTGGCACCCGCAAACCTCCAGCTCAGC  
TATAATCAATACACAGGTGGCCAAGCACAGAACCATGCAGCCAGCAGCAACCACCGAATC  
AGACCACCACCTGCCGTCGTAAGATGGAGAGCACCTGGAATGGCAAAGCAAGAGGAGGT  
TCCAGCCAGCAGAACCGCCAGTGAGGCGACATTGCACCGAGTTGCTGAAATACCTGACA  
GCCACCGATGACATCCTGCTGCACGCCAAAATAACTCCTCCACCTCATCTTCTCCTCC  
TCCAGCGCCTCCAAGAAGAAGTCGGCTGCATCGTCTCAGCAGCAGCAGCAGCCGCCAAA  
CCAACCACCTTGCCACTTCTTTGACCCAGAGTCTCAAATGACCACAAGGGATCACCG  
TTTGAGAACAAAACCATTGAACGCACATTGAGTGTGGAGATAGCTGGAACCCCTGGTTTG  
ACACCACCTACCACGCCCCACACAAAGCCAGTCAAGAGAATCCTTTCAAAGCATCGCTC  
AAAACCAAGTTGTCTTATGTTCTCCTCAGCCTCTGTGTGAAAAGAGCCAGGCTGAGC  
GAGTCCGGCCCCGGCGCTCTGGCCCCGGCCCCGGGTGCCTCGGGCGGGGGCCCCATTAGG  
AAGGGTCCAGAACAGACTGAGCTCTATGCCAGCTGAGCAAAGCTTCCACCGCCCTACCT  
TATTGCATCACCTTCGCGCGGGCCGGGGCGGCCCCGAGGAGCGTCGTAGCACTGGCAAC

AATAGGCGGGCGGCGCCCCGGGCTATAGTGACCACGACTATTGCCAGGCATCGGCCAAA  
AAGGACAGCAGCGCCGACACTGTTACCATGACTACAGCCGAGCAGCAGGATCTGTCTCT  
GTGGATGGAAAAGCAGCACCTGCGCGGGGGTTCGGCTCCGCCCGGACCCCTCAGGAGAT  
GACGAGGACCAACTGCAGACTTGTGCCATCAGCCGGAAGCTCCTGCGTGACAACCAATC  
AGAGCAGAACTCAATAAGCACTTTGGCCACCTTTGCAAGCCCTCTACAGCCAGGCCAGC  
CAGGGCAGAGAGCCCCCAGCCATGCAAATCAGGCCGCGGCCGCTCCGTCCCTGGAGGGG  
GGCTTCTGCCCTTCATGAAGAGCTGGAGCTGACCCAGGGCCGCGTGAGCCGTTCTCTG  
TACCCGTGGGAGGGCACCCCGCTGGACCTCTCTTTGACTGCCCTCCATGCTCCCCCTCC  
TGCTCTCCACCCTCCAGCTGCTCCCCCTCGCGAGGCTCCGTCTCCCCACCTTCTCCCTG  
CTCCTCTCCCCCAGCAGGCCTCTCTGCTGGACCAGCGCCGGCTCCCGCTCCCGCTCTCGT  
TCCCGCTCCGGCTCCCGCAGCTCCTCCTCGCACTACCGGAGACGCTCCCTCTTCTTCTG  
CCCGACCGACGCCCTCCTTGGTCTCGTCAACAACCAAGACTCCAGCACTTTTCTGTTCC  
CGGACCCAGAAGAGCCCCCGCCCTCAGCCTCGCTCCCCCTCAGCCGCAGGCCAAGGTAT  
GACAGTTATGAGGAGTACCAGCACGAGAGGCTGAAGAGGGAGGAGTACCGCCGGGACTAC  
GAGAAGCGGGAGTCTGAGAGGGCCGAGCAGAGGGAGAAGCAGCGGCAAAAAGCAATAGAG  
GAGAGACGGGTCTGTACGTGGGGCGTCTGAGGTCCGACTGCACGCGCACGGAGCTGAAG  
CGCCGCTTTGAAGTCTTTGGCGAAATTGAAGAATGTGCGGTGAACCTGAGGGACGACGGG  
GACAATTTTGGCTTCATCACGTACCGCTACACCTGCGACGCTTCGCCGCCCTGGAGAAC  
GGACACACCTTACGCCGGTCAAACGAGCCTCAGTTCGAGCTGTGCTTCGGCGGACAAAAG  
CAGTTCTGCAAATCCATTACACAGACTTGGACTCCCACTCGGACGACTTTGATCCGGCC  
TCCACCAAGAGCAAGTACGACTCCCTGGACTTTGACAGCTTGCTGCGGGAGGCCAGCGC  
AGCCTCAGAAGG

>Horse\_PPARGC1A

ATGGCGTGGGACATGTGCAACCAGGACTCTGTATGGAGTGACATCGAGTGTGCTGCTCTG  
GTTGGTGAAGACCAGCCTCTTTGCCAGATCTTCCCGAACTTGACCTTTCCGAACTAGAC  
GTGAATGACTTGGATACAGACGGCTTTCTGGGTGGACTCAAGTGGTGCAGTGACCAATCA  
GAAATCATATCCAATCAGTACAACAATGAGCCTTCTAACATATTTGAGAAGATAGATGAA  
GAGAATGAGGCAAACTTGCTAGCAGTCTCACAGAGACTGGACAGTCTCCCTGTGGAT  
GAAGACGGATTGCCCTCATTGATGCGCTGACAGATGGAGATGTGACCACTGAGAATGAG  
GCTAGTCTTCTCCATGCCTGACGGCACCCCTCCGCCTCAGGAGGCAGAAGAGCCGTCT  
CTACTTAAGAAGCTCTTACTGGCACCGGCCAACACTCAGCTAAGTTATAATGAATGCAGT  
GGTCTCAGTACCCAGAACCATGCAAACCACAATCACAGGATCAGAACAACCCTGCAGTT  
GTTAAGACCGAGAATTCTTGGAGCAATAAAGCGAAGAGCATTGTCAACAGCAAAAAGCCA  
CAGAGACGTCCCTGCTCGGAGCTTCTCAAGTATCTGACCACAAATGATGACCCTCCTCAC  
ACCAAACCCACAGAGAACAGGAACAGCAGCAGAGACAAATGCACCTCCAAAAAGAAGTCC  
CACACACAATCGCAGTCACAACATTTACAAGCCAAACCAACAACCTTTGTCTTCTCCTCTG  
ACCCAGAGTACCAAATGACCCCAAGGGTCCCATTTGAGAACAAGACTATTGAACGA  
ACCTTAAGTGTGGAACCTCTGGAACCTGAGGCTTAACTCCACCCACAACCTCCTCCTCAC  
AAAGCCAACCAAGATAACCCTTTCAGGGCTTCTCAAAGCTGAAGTCTTGTCAAGACT  
GTGGTCCCTCCGCCATCAAAGAAGCCCCGTACAGTGAGCCTTCTGGTACCCAAGGCAAT  
AACTCCACCAAGAAAGGGCCCCGAGCAGTCTGAGTTGTACGCACAACCTCAGCAAGTCTCA  
GTGCTCACCAGTGGACACGAGGAAAGGAAGGCCAAGCGGCCAGTCTACGGCTGTTTGGT  
GACCATGACTATTGTGAGTCAATTAATTCCAAAACGGAAATACTCATTAAATATATCACAG  
GAGCTCCAAGACTCTAGACAACCTAGAATATAAAGATGCCTCCTCCAATTGGCAGGGGCAG



ATTTGTTCTTCTACAGATTAGACCAGTGCTACCTGAGAGAGACTTTGGAGGGGAGCAAA  
CAGGTTTCTCCTTGCAGCACCAGAAAACAGCTCCAAGACCAGGAAATCCGAGCTGAGCTG  
AACAAAGCACTTCGGTCATCCCAGTCGAGCTGTTTTTGACGACGAAGCAGACAAGACCAGT  
GAACTGAGGGACAGTGATTTTCAGTAATGAACAATTCTCCAACTACCTATGTTTATAAAT  
TCAGGACTAGCCATGGATGGCCTGTTTCGATGACAGCGAAGATGAAAGTGATAAACTGAAC  
TACCCTTGGGATGGCACGCAATCCTATTGTTTCGATGTGTGCGCCTTCTTGTTCGTCT  
TTAACTCTCCATGTAGAGATTCCGTGTCACCACCCAAATCCTTATTTTCTCAAAGACCC  
CAAAGGATGCGCTCTCGTTCAAGTCTTTTTCTCGACACAGGTCGTGTTCCCGATCACCA  
TATCCAGGTCAAGATCAAGGTCCCCAGGCAGTAGATCCTTCAAGATCTTGCTACTAC  
CATGAGTCAAGCCACTGCAGGCACCGCACACCCGAAATTTCTCCCCTGTGCGCGAGATCA  
CGTTCAAGATCGCCCTACAGCCGTAGACCCAGGTATGACAGCTACGAGGAATATCAACAT  
GAGAGGCTGAAGAGGGAAGAGTACCGCAAAGAGTATGAGAAGCGAGAGTCTGAAAGGGCC  
AAACAAAGGGAGAGGCAGAGGCAGAAGGCAATTGAAGAAGCTCGTGTGATTTATGTTGGT  
AAAATCAGACCTGACACGACACGGACAGAAGTGAAGGGACCGTTTTGAAGTTTTTGGTGAA  
ATTGAAGAGTGCACAGTAAATCTGCGGGATGATGGAGACAGCTATGGTTTCATTACCTAC  
CGTTACACCTGTGATGCTTTTGCTGCCCTTGAAAATGGATACACTTTGCGCAGGTGCAAT  
GAAACTGACTTCGAGCTGTACTTTTGTGGACGCAAGCAATTTTCAAGTCTAACTATGCA  
GACCTAGATTCAAACCTCAGATGACTTTGACCCTGCTTCCACCAAGAGCAAGTACTCT  
CTGGATTCGATAGTTTACTGAAAGAAGCTCAGAGAAGCTTGCAGG

>Human\_PPARGC1A

ATGGCGTGGGACATGTGCAACCAGGACTCTGAGTCTGTATGGAGTGACATCGAGTGTGCT  
GCTCTGGTTGGTGAAGACCAGCCTCTTTGCCAGATCTTCTGAACTTGATCTTTCTGAA  
CTAGATGTGAACGACTTGGATACAGACAGCTTTCTGGGTGGACTCAAGTGGTGCAGTGAC  
CAATCAGAAATAATATCCAATCAGTACAACAATGAGCCTTCAAACATATTTGAGAAGATA  
GATGAAGAGAATGAGGCAAACCTTGTAGCAGTCCTCACAGAGACTAGACAGTCTCCCT  
GTGGATGAAGACGGATTGCCCTCATTGATGCGCTGACAGATGGAGACGTGACCACTGAC  
AATGAGGCTAGTCCTTCTCCATGCCTGACGGCACCCCTCCACCCAGGAGGCAGAAGAG  
CCGTCTACTTAAGAAGCTTACTGGCACCAGCCAACACTCAGCTAAGTTATAATGAA  
TGCAGTGGTCTCAGTACCCAGAACCATGCAAATCACAATCACAGGATCAGAACAACCCCT  
GCAATTGTTAAGACTGAGAATTCATGGAGCAATAAAGCGAAGAGTATTTGTCAACAGCAA  
AAGCCACAAAGACGTCCCTGCTCGGAGCTTCTCAAATATCTGACCACAAACGATGACCT  
CCTCACACCAAACCCACAGAGAACAGAAACAGCAGCAGAGACAAATGCACCTCCAAAAAG  
AAGTCCCACACACAGTCGCAGTCACAACACTTACAAGCCAAACCAACAACCTTATCTCT  
CCTCTGACCCAGAGTACCAAATGACCCCAAGGGTTCCCATTTGAGAACAAGACTATT  
GAACGCACCTTAAGTGTGGAACCTCTCTGGAACCTGACAGCCTAACTCCACCCACCACTCT  
CCTCATAAAGCCAACCAAGATAACCCTTTTAGGGCTTCTCAAAGCTGAAGTCTCTTGC  
AAGACTGTGGTGCCACCACCATCAAAGAAGCCCAGGTACAGTGAGTCTTCTGGTACACAA  
GGCAATAACTCCACCAAGAAAGGGCCGGAGCAATCCGAGTTGTATGCACAACTCAGCAAG  
TCCTCAGTCTCACTGGTGGACACGAGGAAAGGAAGACCAAGCGGCCAGTCTGCGGCTG  
TTTGGTGACCATGACTATTGCCAGTCAATTAATTCCAAAACAGAAATACTCATTAAATATA  
TCACAGGAGCTCCAAGACTCTAGACAACAGAAAATAAAGATGTCTCCTCTGATTGGCAG  
GGGCAGATTTGTTCTCCACAGATTCAGACCAGTGCTACCTGAGAGAGACTTTGGAGGCA  
AGCAAGCAGGTCTCTCCTTGCAGCACAAGAAAACAGCTCCAAGACCAGGAAATCCGAGCC  
GAGCTGAACAAGCACTTCGGTCATCCCAGTCAAGCTGTTTTTGACGACGAAGCAGACAAG

ACCGTGAAGTACAGGGACAGTGATTTTCAGTAATGAACAATTCTCCAAACTACCTATGTTT  
ATAAATTCAGGACTAGCCATGGATGGCCTGTTTGATGACAGCGAAGATGAAAGTGATAAA  
CTGAGCTACCCTTGGGATGGCACGCAATCCTATTGTTCAATGTGTCTCCTTCTTGT  
TCTTCTTTAACTCTCCATGTAGAGATTCTGTGTACCACCCAAATCCTATTTTCTCAA  
AGACCCCAAAGGATGCGCTCTCGTTCAAGTCTTTTCTCGACACAGGTCGTGTTCCCGA  
TCACCATATTCCAGGTCAAGATCAAGTCTCCAGGCAAGTAGATCCTCTTCAAGATCCTGC  
TATTACTATGAGTCAAGCCACTACAGACACCCGACGACCCGAAATTCTCCCTGTATGTG  
AGATCACGTTCAAGATCGCCCTACAGCCGTCGGCCAGGTATGACAGCTACGAGGAATAT  
CAGCACGAGAGGCTGAAGAGGGGAAGAATATCGCAGAGAGTATGAGAAGCGAGAGTCTGAG  
AGGGCCAAGCAAAGGGAGAGGCAGAGGCAGAAAGGCAATTGAAGAGCGCCGTGTGATTTAT  
GTCGGTAAAATCAGACCTGACACAACACGGACAGAACTGAGGGACCGTTTTGAAGTTTTT  
GGTGAATTGAGGAGTGCACAGTAAATCTGCGGGATGATGGAGACAGCTATGGTTTTATT  
ACCTACCGTTATACCTGTGATGCTTTTTGCTGCTCTTGAAAATGGATACACTTTGCGCAGG  
TCAAACGAAACTGACTTTGAGCTGACTTTTTGTGGACGCAAGCAATTTTTCAAGTCTAAC  
TATGCAGACCTAGATTCAAACCTCAGATGACTTTGACCCTGCTTCCACCAAGAGCAAGTAT  
GACTCTCTGGATTTTGATAGTTTACTGAAAGAAGCTCAGAGAAGCTTGCGCAGG

>Macaque\_PPARGC1A

ATGGCGTGGGACATGTGCAACCAGGACTCTGAGTCTGTATGGAGTGACATCGAGTGTGCT  
GCTCTGGTTGGTGAAGACCAGCCTCTTTGTCCAGATCTTCTGAACTTGATCTTTCTGAA  
CTAGATGTGAACGACTTGGATACAGACAGCTTTTTGGGTGGACTCAAGTGGTGCAGTGAC  
CAATCAGAAATAATATCCAATCAGTACAACAATGAGCCTTCAAACATATTTGAGAAGATA  
GATGAAGAGAATGAGGCCAACTTGCTAGCAGTCTCACAGAGACTGGACAGTCTCCCT  
GTGGATGAAGACGGATTGCCCTCATTGATGCGCTGACAGATGGAGACGTGACCACTGAC  
AATGAGGCTAGTCTTCTCCATGCCTGACGGCACCCCTCCACCCAGGAGGCAGAAAG  
CCGTCTCTACTTAAGAAGCTCTTACTGGCACCGGCCAACACTCAGCTAAGTTATAATGAA  
TGCAGTGGTCTCAGTACCCAGAACCATGCAAATCACAATCACAGGATCAGAAACAAACCT  
GCAATTGTTAAGACTGAGAATTCATGGAGCAATAAAGCGAAGAGTATTTGTCAACAGCAA  
AAGCCACAAAGACGTCCCTGCTCGGAGCTTCTCAAATATCTGACCACAAACGATGACCT  
CCTCACACCAAACCCACAGAGAACAGAAACAGCAGCAGAGACAAATGCACCTCCAAAAAG  
AAGTCCCACACACAATCGCAGTCTCAACATTTACAAGCCAAACCAACAACCTTTATCTCTT  
CCTCTGACCCCAAGTACCAAATGACCCCAAGGGTTCCCATTTGAGAACAAGACTATT  
GAACGCACCTTAAGTGTGGAACCTCTGGAACCTGACAGCCTAACTCCACCCACCACTCT  
CCTCATAAAGCCAACCAAGATAACCTTTTAGGGCTTCTCAAAGCCGAAGTCTCTTGC  
AAGACTGTGGTGCCACCACCATCAAAGAAGCCCCGGTACAGCGAGTCTTCTGGTACACAA  
GGCAATAACTCCACCAAGAAAGGGCCGGAGCAATCCGAGTTGTATGCACAACTCAGCAAG  
TCCACAGTGTCTACTGGTGGACACGAGGAAAGGAAGACCAAGCGGCACAGTCTACGGCTG  
TTTGGTGACCATGACTATTGCCAGTCAATTAATTCCAAAACGGAAATACTCATTATATA  
TCACAGGAGCTCCAAGACTCTAGACAAC TAGAAAATAAAGATGTCTCCTCTGATTGGCAG  
GGGCAGATTTGTTCTTCCACAGATTGACACAGTGTACCTGAGAGAGACTTCGGAGGCA  
AGCAAGCAGGTCTCTCTTGCAGCACAAGAAAACAGCTCCAAGACCAGGAAATCCGAGCC  
GAGCTGAACAAGCACTTCGGTCATCCAGTCAAGCTGTTTTTGACGATGAAGCAGACAAG  
ACCAGTGAAGTACAGGGACAGTGATTTTCAGTAATGAACAATTCTCCAAACTACCTATGTTT  
ATAAATTCAGGACTAGCCATGGATGGCCTGTTTGATGACAGCGAAGATGAAAGTGATAAA  
CTGAGCTACCCTTGGGATGGCACGCAATCCTATTGTTCAATGTGTCTCCTTCTTGC

TCTTCTTTAACTCTCCATGTAGAGATTCCGTGTCAACCACCAAATCCTTATTTTCTCAA  
AGACCCCAAAGGATGCGCTCTCGTTCAAGGTCCTTTTCTCGACACAGGTCGTGTTCCCGA  
TCACCATATTCCAGGTCAAGATCAAGGTCCTCCAGGCAGTAGATCCTTCAAGATCCTGC  
TATTACTATGAGTCAAGCCACTACAGACACCGCACGCACCGAAATTCTCCCTTGATGTG  
AGATCACGTTCAAGATCGCCCTACAGCCGTCGGCCCAGGTATGACAGCTACGAGGAGTAT  
CAGCACGAGAGGCTGAAGAGGGAAGAATATCGCAGAGAGTATGAGAAGCGAGAGTCTGAG  
AGGGCCAAACAAAGGGAGAGGCAGAGGCAGAAGGCAATTGAAGAGCGCCGTGTGATTTAT  
GTTGGTAAAATCAGACCTGACACAACACGGACAGAAGTGAAGGGACCGTTTTGAAGTTTTT  
GGTGAAATTGAGGAGTGCACAGTAAATCTGCGGGATGATGGAGACAGCTATGGTTTCATT  
ACCTACCGTTATACCTGTGATGCTTTTGTGCTCTTGAAGTGGATACTTTGCGCAGG  
TCGAACGAAACTGACTTCGAGCTGTACTTTTGTGGACGCAAGCAATTTTCAAGTCTAAC  
TATGCAGACCTAGATTCAAACCTCAGATGACTTTGACCCTGCTTCCACCAAGAGCAAGTAT  
GACTCTCTGGATTTTATAGTTTACTGAAAGAAGCTCAGAGAAGCTTGCAGCAGG

>Medaka\_PPARGC1A

ATGGCGTGGGACAGGTGTAACCAAGACTCGGTGTGGACAGAATTAGAGTGTGCTGCCTTG  
GTTGGTGAAGATCAGCCCCTGCCCCGACCTCCCTGAACTTGACCTCTCAGAGCTGGAC  
GTCAGTGATTTAGATGCAGACAGCTTCTGGGCGGCCTCAAATGGTACAGTGACCAATCA  
GAGATCGTTTCCACTCAGTATGGGAATGAAGCATCGAATCTTTTGAAGAAGATAGATGAA  
GAAAATGAGGCCAACTTGCTGGCAGTGCTCACAGAGACCCTGGACAGCATCCCGGTGGAT  
GAGGACGGATTGCCTTCATTTGAGGCCCTGGCAGATGGGGACGTGACCAATGCCAGTGAT  
CGGAGCTGTCCCTCTCTCCCGACGGCTCGCCACGCACCCCGAGCCCGAGGAGCCTTCC  
TTGCTGAAGAAGCTCCTTCTGGCACCTGCAAACCTCCAGCTCAGCTATAATCAATACACA  
GGTGGCAAGGCACAGAACCATGCAGCCAGCAGCAACCATCGGATCAGACCACCACCTGCC  
GTCGTCAAGACGGAGAGCCCCTGGAATGGCAAGGCAAGAGGGGGCTCCAGCCAACAGAAC  
CGCCCCGTGAGGCGGCCTTGCACTGAGCTGCTAAAATACCTAACAGCCACTGATGACATC  
CTACTCCACACCAAAGGCAGTGAACCTAAGAGCGCCTGGGGAGGTGCTAGTAGCAAAGAC  
AAGAGCGGATTGGCTCTGCCATCTCAGCAGCCACTGCAGCAGCATCACCAGCGAGCCAAA  
CCAACCACCTTGCCACTTCTTTGACCCAGAGTCTCAAATGACTACAAGGGATCACCT  
TTTGAACAACAAACCATTGAACGCACATTAAGTGTGGAGATTGCTGGAACCCAGGTCTG  
ACACCACCAACCACGCCCCACACAAAGCCAGTCAAGAGAATCCTTTCAAAGCATCTCTC  
AAAACCAAGTTGCTCATGTTCTCTCGGCCTTGACATGCAAAAAGAAGCAGTTGAGT  
GAGTTAGGCGCCTGCGTTGTGGCCCTGGCCCCGGTGCCTCAGCTGGGGGCCCCGCCAGG  
AAGGGTCCCGAACAGACTGAGCTTACGCGCAGCTGAGCAAAGCGTCCACCGCCCTCCCT  
TACACTATTGCTCCATATGCAGTAGGGGGCGGCCTTGAGGAGCACCAGCCCTGGCAAC  
AACAAAGCGGCCTGTCCCCGCGGCCACAGTGACCATGATTATTGCCAGGCATCAGCTCGT  
TCCAAGGCGGCAGGGGGCACAGCCACTGTGACCACAGTGGAAATGACATTTACCCACGT  
GCTTCTGATGCCTCAATGCCAGTTCTGGCAAACAAACCCTCACACAAGCCAGTCCTATC  
CCCGCATTCGGGGCCGCTCCATGAGGGACCAACCACAACCTCTGTGCCACGAGCCGGAAG  
CCCCTGTGCGACCAGGAAATCAGAGCAGAGCTCAACAAGCACTTTGGCCACCACCCACAA  
GCCGTCCACAGCCAGGCCCTCAGCCTGCTGTGGCGGGAGAAAATGACTATTACTCCCAG  
AAGCTGCTTGGCTCCAGCTACCTGCACACAGGGTTTCTGCCTTTCCATGATGAGATAGAG  
CTGGGCGAGGGCCGTGACAGTCGCTTTGTCTACCCTTGGGAGGGAACCCCTCTGGACCTA  
CTCTTTGACTGCTCTCCAGCTCTCCCTCCTGTTCCCCACCATCCAGCTGCTCCCCCTCC  
CGAGGCTCCCTCTCCCGCCTTCTCCCTTCTCCTGTACCCAATAGACCTTTCTGCTGG

ACCACCAGCGGATCCCGCTCCCGCTCCCGTTCCCACTCCGGCTCCCGCAGCTCGTCATCA  
CGGTATCGCCGGCGCTCCCTGTCCAGCTCCCCTGATAGACGCCCCCCTCCTGGTCGCGT  
CACAGCACAGATTTGAATGTTTCTCGCTCCAGAACCCACAAGAGTCCCCGCCCCAGTCA  
CGCTCTCCTCTCAGCCGAGGCCAAGGTATGACAGCTATGAGGAGTACCAGCATGAGAGG  
CTGAAGAGGGAGGAGTACCGCCTGGATTACGAGAAGCGGGAGTTTGAAAGGGCTGAGCAG  
AGAGAAAAGCAACGGCAAAAAGCCATAGAGGAGAGGAGGGTGGTGTATGTGGGGCGACTG  
AGGTCCGACTGCACCCGGACCGAGTTGAAGCGCCGCTTTGAAGTCTTCGGAGAAATTGAA  
GAATGTGCAGTGAACCTTGAGGGATGATGGGGACAATTTGGCTTCATCACCTACCGCTAT  
ACTTGTGACGCCTTTGCCGCCCTTGAGAACGGACACACCTTACGCAGGCCAAACGATCCT  
CAGTTCGAGCTGTGCTTCGGTGGACAAAAGCAGTTCGCAATCACATTACACAGACTTG  
>Mouse\_PPARGC1A  
ATGGCTTGGGACATGTGCAGCCAAGACTCTGTATGGAGTGACATAGAGTGTGCTGCTCTG  
GTTGGTGAGGACCAGCCTCTTTGCCAGATCTTCTGAACCTTGACCTTTCTGAACCTGAT  
GTGAATGACTTGGATACAGACAGCTTTCTGGGTGGATTGAAGTGGTGTAGCGACCAATCG  
GAAATCATATCCAACCAGTACAACAATGAGCCTGCGAACATATTTGAGAAGATAGATGAA  
GAGAATGAGGCAAACTTGCTAGCGGTCTCACAGAGACTGGACAGTCTCCCCGTGGAT  
GAAGACGGATTGCCCTCATTGATGACTGACAGATGGAGCCGTGACCACTGACAACGAG  
GCCAGTCTTCTCCATGCCTGACGGCACCCCTCCCCCTCAGGAGGCAGAAGAGCCGTCT  
CTACTTAAGAAGCTTTACTGGCACCAGCCAACACTCAGCTCAGCTACAATGAATGCAGC  
GGTCTTAGCACTCAGAACCATGCAGCAAACCACACCCACAGGATCAGAACAAACCCTGCC  
ATTGTTAAGACCGAGAATTCATGGAGCAATAAAGCGAAGAGCATTGTCAACAGCAAAAG  
CCACAAAGACGTCCCTGCTCAGAGCTTCTCAAGTATCTGACCACAAACGATGACCCTCCT  
CACACCAAACCCACAGAAAACAGGAACAGCAGCAGAGACAAATGTGCTTCCAAAAGAAG  
TCCCATACACAACCGCAGTCGCAACATGCTCAAGCCAAACCAACAACCTTTATCTCTTCT  
CTGACCCACAGAGTCACCAAATGACCCCAAGGGTTCCCATTTGAGAACAAGACTATTGAG  
CGAACCTTAAGTGTGGAACCTCTCTGGAACCTGCAGGCCTAACTCCTCCCAACTCCTCCT  
CATAAAGCCAACCAAGATAACCCTTTCAAGGCTTCGCCAAAGCTGAAGCCCTTTGCAAG  
ACCGTGGTGCCACCGCAACCAAGAGGGCCCGGTACAGCGAGTGTTCTGGTACCCAAGGC  
AGCCACTCCACCAAGAAAGGGCCCGAGCAATCTGAGTTGTACGCACAACCTCAGCAAGTCC  
TCAGGGCTCAGCCGAGGACACGAGGAAAGGAAGACTAAACGGCCAGTCTTCGGCTGTTT  
GGTGACCATGACTATTGTCACTCAATTCAAAACGGATATACTCATTAAACATATCA  
CAGGAGCTCCAAGACTCTAGACAACCTAGACTTCAAAGATGCCTCCTGTGACTGGCAGGGG  
CACATCTGTTCTTCCACAGATTCAGGCCAGTGCTACCTGAGAGAGACTTTGGAGGCCAGC  
AAGCAGGTCTCCTTGCAGCACCCAGAAAACAGTCCAAGACCAGGAAATCCGAGCGGAG  
CTGAACAAGCACTTCGGTATCCCTGTCAAGCTGTGTTTGACGACAAATCAGACAAGACC  
AGTGAACCTAAGGGATGGCGACTTCAGTAATGAACAATTCTCCAACTACCTGTGTTTATA  
AATTCAGGACTAGCCATGGATGGCCTATTTGATGACAGTGAAGATGAAAGTGATAAAGT  
AGTACCCTTGGGATGGCACGCAGCCCTATTCATTGTTTCGATGTGTCGCCTTCTTGCTCT  
TCCTTAACTCTCCGTGTCGAGACTCAGTGTACCACCGAAATCCTTATTTCTCAAAGA  
CCCCAAAGGATGCGCTCTCGTTCAAGATCCTTTTCTCGACACAGGTGCTGTTCCCGATCA  
CCATATTCCAGGTCAAGATTAAGGTCCCCAGGCAGTAGATCCTCTTCAAGATCCTGTTAC  
TACTATGAATCAAGCCACTACAGACACCGCACACACCGCAATTCTCCCTTGATGTGAGA  
TCACGTTCAAGGTCACCCCTACAGCTGTAGGCCAGGTACGACAGCTATGAAGCCTATGAG  
CACGAAAGGCTCAAGAGGGATGAATACCGCAAAGAGCACGAGAAGCGGGAGTCTGAAAGG

GCCAAGCAGAGAGAGAGGCAGAAGCAGAAAGCAATTGAAGAGCGCCGTGTGATTTACGTT  
GGTAAAATCAGACCTGACACAACGCGGACAGAATTGAGAGACCGCTTTGAAGTTTTTGGT  
GAAATTGAGGAATGCACCGTAAATCTGCGGATGATGGAGACAGCTATGGTTTCATCACC  
TACCGTTACACCTGTGACGCTTTCGCTGCTCTTGAGAATGGATATACTTTACGCAGGTGC  
AACGAACTGACTTCGAGCTGTACTTTTGTGGACGGAAGCAATTTTTCAAGTCTAACTAT  
GCAGACCTAGATACAACTCAGACGATTTTGACCCTGCTTCCACCAAGAGCAAGTATGAC  
TCTCTGGATTTTGATAGTTTACTGAAGGAAGCTCAGAGAAGCTTGCGCAGG

>Naked\_mole\_rat\_PPARGC1A

ATGGATGAGACCTCTCCAGGCTGGAAGAAGACTGGAAAAAGAAGCTTCAGCAAGAAGCA  
GGCTGGCAGTGTGCTGCTTTGGTTGGTGAAGACCAGCCCCTTTGCCAGATCTCCTGAA  
CTTGATCTTTCTGAACTAGATGTGAACGACTTGGATACAGACAGCTTTCTGGGTGGACTG  
AAGTGGTGCAGTGACCAATCAGAAATAATATCCAACCAAGTACAACAATGAGCCTTCAAAC  
ATATTTGAGAAGATAGATGAAGAAAATGAGGCAAACCTTGTAGCTGTCTCACAGAGACA  
CTGGACAGTCTCCCTGTGGACGAAGACGGATTGCCCTCATTTGACGCACTGACAGATGGA  
GACGTGACTACTGACAACGAGGCCAGTCCCTCCTCCATGCCTGACGGCACCCCTCCACCT  
CAGGAGGCAGAAGAGCCATCTCTACTTAAGAAGCTTACTGGCACCGGCAAATACTCAG  
CTGAGTTATAATGAATGCAGTGGTCTCAGTACCCAGAACCATGCAAACCACAATCACAGG  
ATCAGAACAAACCCTGCAGTTGTTAAGACCGAGAATTCATGGAGCAATAAAACAAAGAGC  
ATTTGTCAACAGCAAAAAGCCACAAAGACGTCCCTGCTCGGAGCTTCTCAAGTATCTGACC  
ACAAATGATGACCCTCCTCACACCAAACCCACAGAGAACAGGAACAGCAGCAGAGACAAA  
TGCACCTCCAAAAGAAGTCCACACACAATCGCAGTCCCAACATGTACAAGCCAAACCA  
ACAACCTTTATCTCTTCTGACCCAGAGTCACCAAATGACCCCAAGGGTTCCCATTT  
GAGAACAAGACTATTGAACGAACCTTAAGTGTGGAAGCTCTGGAAGTGCAGGCCTAACT  
CCACCTACAACCTCCTCATAAAGCCAACCAAGATAACCCTTTCAGGGCTTCTCAAAG  
CTGAAGTCTCTTGCAAGACAGTGGTGCCACCGCCATCAAAGAAGCCCCGGCACAGTGAG  
TCTTCTGGTACCCAAGTCAATAACTCCACCAAGAAGGGGGCCCGAGCAATCTGAGTTGTAT  
GCACAACCTCAGCAAGTCTCAGTGTGCGAAGTGGACAAGAGGAGAGGAAGACTAAGCGG  
CCCAGCCTACGGCTGTTTGGTGACCATGACTATTGTGAGTCCATTAATTCCAAAACAGAA  
ATAATTATTAATATATCACAAGAGCTCCAAGACTCTAGACAACCTAGACTATAAAGATGCC  
TCCTCTGACTGGCAGGGGAGGTTTGTCTTCCACAGATTCAGACCAAGTGTACTCTGAGA  
GAGACTTTGGAGGCCAGCAAGCAGCTCTCTCCTTGCAGCACCCAGAAAACAGCTCCAGGAC  
CAGGAAATCCGAGCCGAGCTGAACAAGCATTTCGGTCATCCAGTCAAGCTGTTTTTGAC  
GACGAAGCAGACAAGACCAAGTGAAGTGAAGGACAGTGATTTAGTAATGAACAATTCTCC  
AAACTACCTATGTTTATAAATTCAGGACTAGCCATGGATGGCCTGTTTGTGACAGCGAA  
GATGAAAGTGATAAAGTGAAGTACCCTTGGGATGGCACGCAATCCTATTGTTTGTGAT  
GTGTGCCTTCTGCTCTTCTTTAACTCTCCATGTAGAGATTCCGTGTGCCACCCAAA  
TCCTTATTTTCTCAAAGACCCCAAAGGATGCGCTCTCGTTCAAGGTCCTTTTCTCGACAC  
AGGTCATGTTCCCGATCACCTTATTCCAGATCAAGATCAAGGTCCCCAGGCAGTAGATCT  
TCAAGATCCTGCTACTACTATGAATCAAGCCACTACAGACACCACACGCACCGAAACTCT  
CCCTTGTATGTGAGATCACGTTCAAGATCACCTACAGCCGTAGGCCAGGTATGACAGC  
TACGAGGCATATCAGCATGAAAGGCTGAAGAGGGAAGAATACCGGAAAGAGTACGACAAG  
CGGGAATCTGAAAGGGCCAAACAGAGGGAGAGGCAGAGGCAGAAGGCAATTGAAGAGCGC  
CGTGTGATTTACATCGATAAAATCAGACCTGACACAACACGGACAGAACTGAGGGACCGC  
TTTGAAGTTTTTGGTGAAGTGAAGGAGTGCACAGTAAATCTGCGGGATGATGGAGACAGC

TATGGTTTCATCACCTATCGTTATACCTGTGACGCTTTTGCTGCTCTTGAAAATGGATAT  
ACTTTGCGCAGGTCTGAACGAAATGGACTTCGAGCTGTACTTTTGTGGACGCAAGCAATTT  
TTCAAGTCTAACTATGCAGACTTAGATTCAAACCTCAGATGACTTTGACCCTGCTTCCACC  
AAGAGCAAGTATGACTCTCTGGATTTTGATAGTTTACTGAAAGAAGCTCAGAGAAGCTTG  
CGCAGG

>Opossum\_PPARGC1A

ATGGCGTGGGACATGTGCAACCAGGACTCTGTATGGAGTGACATAGAGTGTGCTGCTCTC  
GTTGGTGAAGACCAGCCTCTTTGCCAGATCTCCAGAACTTGACCTCTCTGAACTAGAC  
GTGAATGACTTGGATGCCGACGGCTTCTAGGTGGACTCAAGTGGTGTAGCGACCAATCA  
GAAATCATTTCTAATCAGTACAGCAATGAATCTTCAAATATATTTGAGAAGATAGATGAA  
GAGAATGAGGCAAACCTTGCTAGCAGTTCTCACAGAAACATTGGACAGTCTCCCTGTGGAT  
GAGGATGGATTGCCCTCATTTGATGCACTGACAGATGGAGATGTGACCAATGACAATGAT  
GCTAGCCCTTCGCCTATGCCCGACGGCACCCCTCCAACCTCAGGAGGCAGAAGAGCCGTCT  
CTACTTAAGAAGCTTCTACTGGCTCCAGCCAACACTCAGCTAAGTTATAATGAATGCAGT  
GGTCTCAGTACTCAGAACCATGCAAATACTAATCATAGGATCAGAACAAACCCTGCGGTT  
GTTAAGACCGAGAATTCATGGAGCAATAAAGCAAAGAGCATTGTCAACAGCAAAAGCCA  
CAAAGGCGTCCCTGCTCGGAGCTCCTCAAGTATCTGACTACAAATGATGACCCTCCTCAG  
ACCAAACCAACAGAGAGCAGGAACGGCAGCAAAGACAAATGCCCTTCCAAAAAGAAGCCC  
CATCTCCAGTCTCAGCCGACCATTTGCAAGCCAAACCAACAAGTTTATCACTTCCTTTG  
ACACCCGAGTCACCAAATGATCCCAAGGTTCCCCATTTGAGAACAAGACTATTGAAAGA  
ACCTTAAGTGTGGAACCTCTGGAACCTGAGGCTAAGTCCACCTACGACTCCTCCTCAT  
AAAGCTAATCAAGATAATCCTTTTAGGACTTCTCAAAGCCGAAGTCATCATGTAAAAGC  
AGTGTGCCACCTTCCAAGAAACCCGCTATAGCGAATCTTCTGGTACCCAAGTAAATACT  
CCCCTAAGAAAGGTCCAGAACAATCGGAGCTGTACGCCAGCTCAGCAAGACTTCAGGG  
CTATCCAGCGGACAGGAGGAGAGAAAGACAAAACGGCCTAGTTTACGGCTATTTGGAGAC  
CATGACTACTGTGATCGATTAATGCAAAAACCTGAAATCCGCATTAATTTATCACAGGAG  
CTCCAGGTCTCTAGACAACCTAGAATATAAAGATGCCTCCCCTGGATGTCAGGGGCCGACT  
CGTTCTCCACAGACCCAGACCAGTGCTACACAAGAGAGACTTTTCAGGCAAGCAAGCAG  
GGTTCCCATGCGGCCACAGAAAACAGCTCCAAGACCAGGAAATCCGGGCTGAGCTGAAC  
AAGCACTTTGGTCATCCAGTCAAGCTGTTTTTGTATGACGAAGCAGACAAGACCAGTGAA  
CTGAGGAACAGTGATTTTAGTAACGAACAATTCTCCAACTACCTATGTTTATAAATTCA  
GGACTAGCCATGGATGGTCTGTTTGTATGACAGCGAAGATGAAAGTGATAAACTGAGCTAC  
CCTGGGATGGGACACAATCCTATTGTTTCGACGTGTCACCTTCTTGCTCTTCTTTT  
AATTCTCCATGTCGAGATTGAGTGTCTCCACCAAATCCTTATTTTCTCAAAGATCCCAA  
AGGATACTCTAGATCACGGTCCTTTTCTCGACACAGGTCATGTTCCCGATCTCCATAT  
TCCAGGTCAAGATCAAGGTCACCAGGCAGCAGATCTTCTCAAGATCTTGTACTACTAT  
GAGTCCAGCCATTGCAGACATCGGGACACCACAGTTCTCCCTTATATGCAAGGTCACGC  
TCCAGATCGCCCTACAGCCGAAGGCCAGGTATGACAGCTACGAAGAATATCAGCATGAA  
AAGCTGAAGAGGGAAGAATACCGCAAAGAATATGAGAAGCGAGAGTCTGAAAGGGCCAAG  
CAAAGGGAGAGACAAAGGCAGAAGGCAATTGAAGAGCGTCTGTTGTTGTTGTTGTTGTT  
ATCAGACCTGACATCACCCGACAGAACTGAGGGACCGATTTGAAGTTTTTGGTGAAT  
GAGGAGTGCACAGTAAATCTGCGGGATGATGGAGATAGCTATGGTTTCATCACCTACCGC  
TATACTTGTGATGCTTTTGTGCTCTTGAAAATGGATACACTTTGCGCAGGTCTGAATGAA  
CCTGACTTTGAGCTGTACTTTTGTGGACGCAAGCAATATTTCAAGTCTAACTATGCAGAC

CTAGATTCACACTCAGATGATTTTGATCCTGCTTCTACCAAGAGCAAGTATGACTCTCTG  
GATTTTGATAGTTTACTGAAAGAGGCCAGAGAAGCCTACGCAGG

>Orangutan\_PPARGC1A

ATGGCGTGGGACATGTGCAACCAGGACTCTGAGTCTGTATGGAGTGACATCGAGTGTGCT  
GCTCTGGTTGGTGAAGACCAGCCTCTTTGCCAGATCTTCTGAACTTGATCTTTCTGAA  
CTAGATGTGAACGACTTGGATACAGACAGCTTTCTGGGTGGACTCAAGTGGTGCAGTGAC  
CAATCAGAAATAATATCCAATCAGTACAACAATGAGCCTTCAAACATATTTGAGAAGATA  
GATGAAGAGAATGAGGCAAACCTTGCTAGCAGTCCTCACAGAGACTGGACAGTCTCCCT  
GTGGATGAAGACGGATTGCCCTCATTGATGCGCTGACAGATGGAGACGTGACCACTGAC  
AATGAGGCTAGTCCTTCTCCATGCCTGACGGCACCCCTCCACCCAGGAGGCAGAAGAG  
CCGTCTACTTAAGAAGCTTACTGGCACCAGCCAACACTCAGCTAAGTTACAATGAA  
TGCAGTGGTCTCAGTACCCAGAACCATGCAAATCACAATCACAGGATCAGAACAAACCT  
GCAATTGTTAAGACTGAGAATTCATGGAGCAATAAAGCGAAGAGTATTTGTCAACAGCAA  
AAGCCACAAAGACGTCCCTGCTCAGAGCTTCTCAAATATCTGACCACAAACGATGACCCT  
CCTCACACCAAACCCACAGAAAACAGAAACAGCAGCAGAGACAAATGCACCTCCAAAAAG  
AAGTCCCACACACAATCGCAGTCACAACATTTACAAGCCAAACCAACAACTTTATCTCTT  
CCTCTGACCCAGAGTACCAAATGACCCCAAGGGTTCCCCATTTGAGAACAAGACTATT  
GAACGCACCTTAAGTGTGGAACCTCTGGAACCTGACGGCCTAACTCCACCCACCACTCT  
CCTCATAAAGCCAACCAAGATAACCCTTTTAGGGCTTCTCAAAGCTGAAGTCCTCTTGC  
AAGACTGTGGTGCCACCACCATCAAAGAAGCCCAGGTACAGTGAGTCTTCTGGTACACAA  
GGCAATAACTCCACCAAGAAAGGGCCGGAGCAATCCGAGTTGTATGCACAACTCAGCAAG  
TCCTCAGTGCTCACTGGTGGACACGAGGAAAGGAAGACCAAGCGGCCAGTCTACGGCTG  
TTTGGTGACCATGACTATTGCCAGTCAATTAATCCAAAACGGAAATACTCATTAAATATA  
TCACAGGAGCTCCAAGACTCTAGACAAC TAGAAAATAAAGATGTCTCCTCTGATTGGCAG  
GGGCAGATTTGTTCTTCCACAGATTGACAGCAGTGTACCTGAGAGAGACTTTGGAGGCA  
AGCAAGCAGGTCTCTCCTTGACGACACAAGAAAACAGCTCCAAGACCAGGAAATCCGAGCT  
GAGCTGAACAAGCACTTCGGTCATCCAGTCAAGCTGTTTTTGACGACGAAGCAGACAAG  
ACCAGTGAAGTGAAGGACAGTGATTTAGTAATGAACAATTCTCCAACTACCTATGTTT  
ATAAATCAGGACTAGCCATGGATGGCCTGTTTGATGACAGCGAAGATGAAAGTGATAAA  
CTGAGCTACCCTGGGATGGCAGCAATCCTATTGTTCAATGTGTCTCCTTCTTGT  
TCTTCTTTAACTCTCCATGTAGAGATTCCGTGTACCACCCAAATCCTTATTTTCTCAA  
AGACCCCAAAGGATGCGCTCTCGTTCAAGGTCTTTTCTCGACACAGGTCGTGTTCCCGA  
TCACCATATTCCAGGTCAAGATCAAGGTCCCAAGGCAGTAGATCCTCTTCAAGATCCTGC  
TATTACTATGAGTCAAGCCACTACAGACACCGCACGACCGAAATTCTCCCTGTATGTG  
AGATCACGTTCAAGATCGCCCTATAGCCGTCGGCCAGGTATGACAGCTACGAGGAATAT  
CAGCACGAGAGGCTGAAGAGGGAAGAATATCGCAGAGAGTATGAGAAGCGAGAGTCTGAG  
AGGGCCAAGCAAAGGGAGAGGCAGAGGCAGAAGGCAATTGAAGAGCGCCGTGTGATTTAT  
GTCGGTAAAATCAGACCTGACACAACACGGACAGAACTGAGGGACCGTTTTGAAGTTTTT  
GGTGAATTGAGGAGTGACAGTAAATCTGCGGGATGATGGAGACAGCTATGGTTTCATT  
ACCTACCGTTATACCTGTGATGCTTTTTGCTGCTTTGAAAATGGATACACTTTGCGCAGG  
TCGAACGAAACTGACTTCGAGCTGTACTTTTGTGGACGCAAGCAATTTTCAAGTCTAAC  
TATGCAGACCTAGATTCAAACCTCAGATGACTTTGACCCTGCTTCCACCAAGAGCAAGTAT  
GACTCTCTGGATTTTGATAGTTTACTGAAAGAAGCTCAGAGAAGCTTGCGCAGG

>Western\_painted\_turtle\_PPARGC1A





GTGAACGACTTGGATACAGACAGCTTTCTGGGCGGACTCAAGTGGTGCAGTGACCAATCA  
GAAATAATATCCAATCAGTACAACAATGAGCCTTCAAACATATTTGAGAAGATAGATGAA  
GAGAACGAGGCGAACTTGCTAGCAGTCCTCACAGAGACACTGGACAGTCTCCCTGTGGAT  
GAAGACGGATTGCCCTCATTGACGCGTTGACAGATGGAGATGTGACCACGGAGAACGAG  
GCTAGTCCTTCTCCATGCCTGACGGCACCCCTCCGCCTCAGGAGGCAGAAGAGCCGTCT  
CTACTTAAGAAGCTTACTGGCACCAGCCAACACTCAGCTAAGTTATAATGAATGCAGT  
GGTCTCAGTACCCAGAACCATGCAAACCATAATCACAGGATCAGAACAACCCTGCAGTT  
GTAAAGACTGAGAATTCATGGAGCAATAAAGCGAAGAGCATTGTCAACAGCAAAGCCA  
CAAAGACGTCCCTGCTCGGAGCTTCTCAAGTATCTGACCACAAACGATGACCCTCCTCAC  
ACCAAACCCACAGAGAACAGGAACAGTAGCAGAGACAAATGCACCTCCAAAAGAAGTCC  
CACACACAATCGCAGTCTCAACATTTACAAGCCAAACCAACAACCTTTATCTTCTCTCTG  
ACCCACAGAGTCACCAAATGACCCCAAGGGTCCCATTTGAGAACAAGACTATTGAACGA  
ACCTTAAGTGTGGAACCTCTGGAACCTGCAGGCCTAACTCCACCCACAACCTCCTCAT  
AAAGCCAACCAAGATAGCCCTTCAGGACTTCTCCGAAGCTGAAGTCCTTTGCAAGACT  
GTGGTACCTCCGCCGTCCAAGAAGCCCCGGAACAGTGAGCCTTCGGGCGCCCAAGGCAAT  
AACTCCACCAAGAAAGGGCCCCGAGCAGTCTGAGCTGTACGCGCAGCTCAGCAAGACCTCC  
GTGCTCACCAGTGGACACGAGGAAAGGAAGGCCAAGCGGCCAGTCTACGGCTGTTTGGT  
GACCATGACTATTGTGAGTCAATTAATTCCAAAACAGAAATACTCATTAACTATCACAG  
GAGCTCCAAGACTCTAGACCACTAGAATATAAAGATGTCTCCTCCGATCGGCAGGGGCAA  
ATTTGCTCTTCCACAGATTAGACCAAGTGTACCTGAGAGAGACTTCGGAGGCGGGCAAG  
CAGGTCTCTCTTGACGACCAGAAAACAGCTCCAAGACCAGGAAATCCGAGCCGAGCTG  
AACAAAGCACTTCGGTCATCCAGTCAAGCTGTTTTGACGACGAAGCAGACAAGACCAAGT  
GAACTGAGGGACAGTGATTTAGTAATGAACAATTCTCCAAACTACCTATGTTTATAAAT  
TCAGGACTAGCCATGGATGGCCTGTTGATGACAGCGAAGATGAAAATGATAAACTGAAC  
TACCCTTGGGACGGCACGCAGTCCTATTGTTTCGGTGTGTCGCCTTCTTGCTCTTCT  
TTAACTCTCCATGTAGGGATTCCGTGTCACCACCAAATCCTTATTTGCTCAAAGACCC  
CAAAGGATGCGCTCTCGTTCAAGGTCTTTTCTCGACACAGGTGCTGTTCCCGATACCA  
TATCCAGGTCAAGATCAAGGTCCCAGGCAGTAGATCCTTCAAGATCTTGCTACTAC  
TATGAGTCGAGCCACTGCAGACACCGCGCACCGAAATTCCTCTGTGCGCAAGATCA  
CGTTCCAGGTGCGCCTACAGCCGTAGGCCAGGTATGACAGCTACGAGGAATATCAGCAC  
GAAAGGCTGAAGAGGGAAGAATACCGCAAAGAGTATGAGAAGCGGGAGTCTGAGAGGGCC  
AAGCAAAGGGAGAGGCAGAGGCAGAAGGCAATTGAAGAACGCCGTGTGATTTACGTTGGT  
AAAATCAGACCTGACACGACACGGACGGAAGTGAAGGACCGTTTTGAAGTTTTTGGTGAA  
ATTGAGGAGTGCACAGTAAATCTACGGGATGATGGAGACAGCTATGGTTTCATTACCTAC  
CGTTATACCTGTGATGCTTTTGTGCTCTTGAAAATGGATATACTTTGCGCAGGTGCAAT  
GAAACTGACTTCGAGCTGTACTTTTGTGGACGCAAGCAATTTTCAAGTCTAACTATGCA  
GACCTAGATTCAAACCTCAGATGACTTTGACCCTGCTCCACCAAGAGCAAGTATGACTCT  
CTGGATTTGATAGTTTACTGAAAGAAGCTCAGAGAAGCTTGCGCAGG

>Platypus\_PPARGC1A

ATGGCGTGGGACATGTGTAACCAGGATTCTGTATGGAGTGACATAGAGTGTGCTGCTCTG  
GTTGGTGAAGACCAGCCTCTGTCCGACCTCCAGAAGTGTGACCTCTCCGAAGTAGAC  
GTGAATGACTTGGATGCCGACAGCTTCTGGGTGGACTCAAGTGGTACAGTGACCAATCG  
GAAATCATTTCCAATCAGTACAGCAATGAACCTTCAAATATATTTGAGAAGATAGATGAA  
GAGAATGAGGCAAACCTTGCTAGCAGTCCTCACAGAGACACTGGACAGTATCCCCGTGGAC

GAGGATGGATTGCCTTCATTTGATGCACTGACAGATGGAGATGTGACCAACGAAAATGAT  
TCTAGCCCTTCATCCATGCCTGACGGCACCCCTCCGACTCAGGAGGCAGAAGAGCCGTCT  
CTACTTAAGAAGCTCTTGCTGGCTCCAGCCAATACTCAGCTAAGTTATAATGAATGCTGT  
GGTCTCAGCACACAAAACCATGCAAACCCTAATCACAGGATCAGAACAATCCCTGCAGTG  
GTTAAGACTGAGAATTCGTGGAGCAATAAAGCGAAGAGCATTGTCAACAGCAAAAAGCCG  
CAAAGGGCCCCCTGCTCAGAGCTCCTCAAGTATCTGACCACGAATGACGACCCGCTCAG  
ACCAAAGCAGCAGAGAGCAGGAGCAGCAGCCAAGACAAATGCACCTCAAAAAAGAAGCCC  
CACTTGCAGCCTCAGACGCATCATTTGCAAGCCAAACCAACAAGTTTATCACTTCCTCTG  
ACCCCCGAGTCACCAAATGATGCCAAGGGTCCCCATTTGAGAACAAGAATATTGAACGA  
ACCTTAAGTGTGGAACCTCTGGAACCTGAGGCTAACTCCACCTACAACCTCCTCCTCAC  
AAAGTCAACCAAGATAGTCTTTTAGGACTTCTCCAAGCCGAAGTCTCATGCAAGACT  
GTTGTGCCACCGTCCAAAAAGCCCCGTTTCAGTGAGTCTTCCAGGACCCAAGGAAATAAT  
CCCAATAAGAAAAGCCCCGGAGCAATCGGAGCTGTACGCCAGCTCAGCAAGAACTCCGTA  
CTGTCCAGCGGACATGAGGAGAGGAAATCAAACGACCGAGTTTGGGCTGTTTGGTGAC  
CACGACTACTGTCAGTCGCTCAATGCTAAAGCCGAAATCCGCATCAACGTACCGCAGGAG  
CTCCAGGACTCTAGACAACTCGAATATAAAGATTCTCATCTGGATGGCAGTGGCAGATT  
TGACTTCTGCAGATCAAGACCAGTGCTCCACGAGAGAGACTTACAGGAGAGCAAGCAG  
GGAGCCCCACGCAACAACCGCAAGCAGCTTCAAGACCAGGAAATCCGCGCTGAGCTGAAC  
AAGCACTTTGGTCATCCCAGCCAGGCTGTTTTTGATGACGAAGCAGACAAGACCAGTGAA  
CTGAGGGACAGTGATTTTAGTAATGAACAATTCTCCAACTACCTATGTTTATAAATTCA  
GGACTAGCTATGGATGGTCTGTTTGATGACAGCGAAGATGAAAATGATAAACTGTGCTAC  
CCTTGGGATGGGACACAATTCTATTATTGTTTGATGTATCGCCTTCTGCTCTCTTTT  
AACTCTCCATGTAGAGATTAGTGTCTCCACCCAAATCCTTATTTTCTCAAAGATCCCAA  
AGGATACTCTCGAGATCAAGGTCTTTTCTCGACACAGGTCATGTTCCCGATCTCCATAT  
TCCCGGTCAAGATCAAGGTCTCCAGCAGCAGATCCTCTTCAAGATCTTGTTACTACTAC  
GAGCCAAGCCACTGCAGACCCCGAGCTCCGCGGAGATCTCCTTTACACGCAAGATCGCGC  
TCCAGGTGCGCCTTCACTCGTAGGCCAGGATGACAGCTACGAGGAATATCAGCACGAA  
AGGCTGAAGAGGGAGGAATATCGCAAAGAGTACGAAAAACGGGAGTCTGAGAGGGCCAAG  
CAAAGGGACAGACAAAGGCAGAAGGCAATTGAAGAACGTCGTGTGATTTATGTGGGTAAA  
ATCAGACCTGACACAACCCGGACAGAAGTGAAGGACCGTTTTGAAGTTTTTGGTGAATTT  
GAGGAGTGACCGTAAATCTGCGGGATGATGGAGACAGCTATGGTTTCATCACCTACCGC  
TACACCTGCGATGCTTTTGTGCTCTTGAAAACGGATACACTTTGCGCAGGTGCAATGAA  
CCTGACTTTGAGCTGACTTTTGTGGACGCAAGCAATTTTCAAGTCTAACTATGCAGAC  
CTAGATCAAACCTCAGATGATTTTGACCCGCTTCCACCAAGAGCAAGTATGACTCCATG  
GATTTTGATAGTTTACTTAGAGAAGCCCAGCGGAGCCTGCGCAGG

>Rabbit\_PPARGC1A

ATGGCGTGGGACATGTGCAGCCAGGACTCTGTATGGAGTGACATCGAGTGTGCTGCTCTG  
GTTGGTGAAGACCAGCCTCTTTGCCAGATCTTCTGAACTTGATCTTTCTGAACTAGAT  
GTGAATGACTTGGATACAGACAGCTTTCTGGGTGGACTCAAGTGGTGCAGTGACCAATCA  
GAAATAATATCCAACCAATACAACAATGAGCCTTCAAACATATTCGAGAAGATAGATGAA  
GAGAATGAGGCAAACCTTGCTAGCAGTCTCACTGAGACCCTGGACAGTCTCCCTGTGGAT  
GAAGACGGATTGCCTTCATTCGATGCGCTGACAGATGCTGACGTGACCACTGACAACGAG  
GCCAGCCCTTCTCCATGCCGCACGGCACCCCTCCCCCTCAGGAGGCAGAAGAGCCGTCT  
CTACTTAAGAAGCTTACTAGCACCGGCCAACACTCAGTTAAGTTATAATGAATGCAGC

GGTGTCA GTACCCACAACCATGCAAACATAATCACAGGATCAGAACAACCCCGCAGTT  
GTTAAGACTGAGAATTCATGGAGCAATAAAGCGAAGAGCATTGTCAACAGCAAAAGCCA  
CAAAGACGTCCCTGCTCGGAGCTTCTCAAGTATCTGACCACAAACAATGACCCTCCGCAC  
ACCAAACCCGCAGAGAACAGGAACAGCAGCAGAGACAAATGCAACTCCAAAAAGAAGTTC  
CACTCACAGTCGCAGTCGCAACATGTGCAAGCCAAACCAACAACCTTTATCTCTTCCTCTG  
ACCCAGAGTCACCAATGACCCCAAGGGTCCCCATTTGAGAACAAGACTATTGAACGA  
ACCTTAAGTGTGGAACCTCTGGAAGTGCAGGCCTAACTCCACCCACGACTCCTCCTCAT  
AAAACCAACCAAGATAACCCCTTCAGGGCTTCTCAAAGCCGAAGCCCTCTGTAAGACC  
GTGGTGCCACCACCATCAAAGAAGGCCCGGTGCAGTGAGACTTCTGTACCCAAAGCAGT  
AACTCCGCCAAGAAGGGGCCCGAGCAATCCGAGTTGTACGCACAACCTCAGCAAGTCTCG  
GTGCTCGGCAGTGGGCCCGAGGAGAAGAAGCCTAAGAGGCCAGCCTGCGGCTGTTTGGT  
GATCATGACTATTGTCAAGTCAATTAATCCAAAACAGAAATACTCGTTAATATATCACAG  
GAGCTTCAAGACTCCAGGCAACTAGACTATAAAGATGCCTCCTCTGATTGGCAGGGGCGAG  
ATCTGCTCTTCCCAGATTGAGACCAGTGCTCCCTGAGAGAGACGTTGGAGGCCAGCAAG  
CAGGTCTCTCCTTGCAGCACCAGGAAACAGCTCCAAGACCAGGAAATCCGAGCCGAGCTG  
AACAAGCACTTCGGTCATCCAGTCAAGCTGTTTTTGACGACGAAGCAGACAAGACCAGT  
GAACTGAGGGACAGTGATTTCAAGTAAACAATTCTCAAACCTACCTATGTTTATAAAT  
TCAGGACTAGCCATGGATGGCCTGTTTGATGACAGCGAAGATGAAAGTGACAAACTGAGC  
TACCCTGGGATGGCACGCAATCCTATTGTTTGTGTTGATGTGCTCCGTCTTGCTCTTCT  
TTTAACTCTCCGTGTAGAGATCCGTGTACCACCCAAATCCTTATTTTCTCAAAGACCC  
CAAAGGATGCGTTCTCGTTCAAGGTCCTTTTCTCGGCACAGGTCGTGTTCCCGATACCA  
TATCCAGGTCAAGATCAAGGTCCCAGGCAGTAGATCCTCTTCAAGATCCTGCTACTAC  
TATGAGTCAAGCCACTACAGACACCGCACACACCGAACTTCCCCCTTGATGTGAGATCA  
CGTTCAAGATCACCTACAGCCGTAGGCCAGGTATGACAGCTACGAGGAATATCAGAAC  
GAAAGGCTGAAGAGAGAAGAATACCGCAAAGAGTACGAGAAGCGGGAATCGGAAAGGGCC  
AAGCAAAGGGAGAGGCAGAGGCAGAAGGCGATTGAAGAGCGCCCGTGATTTATGTGGGT  
AAAATCAGACCTGACACAACACGGACAGAAGTGAAGGACCGTTTTGAAGTTTTTGGTGAA  
ATTGAGGAGTGACAGTAAATCTGCGGGATGATGGAGACAGCTATGGTTTCATTACCTAC  
CGATACACCTGTGATGCTTTTGTGCTCTTGAAAATGGATATACTTTGCGCAGGTGCAAC  
GAAACAGACTTCGAGCTGTACTTTTGTGGACGCAAGCAATTTTCAAGTCTAACTATGCA  
GACCTAGATTCAAACCTCAGATGACTTTGACCCTGCTTCCACCAAGAGCAAGTACGACTCT  
CTGGATTTGATAGTTTACTGAAAGAAGCTCAAAGAAGCTTGCAGCAGG

>Tetraodon\_PPARGC1A

AGGTATGACAGTTATGAGGAGTACCAGCACGAGAGGCTGAAGAGGGAGGAGTACCGCCGG  
GACTACGAGAAGCGGGAGTCCGAGAGGGCCGAGCAGAGGGAGAAGCAACGGCAAAAAGCA  
ATAGAGGAGAGACGGGTCGTGTACGTGGGCCGACTGAGGTCCGACTGCACGCGCACGGAG  
CTGAAGCGCCGCTTTGAAGTCTTTGGCGAAATTGAAGAATGTGCGGTGAACCTGAGGGAC  
GACGGGGACAACCTTTGGCTTCATCACGTACCGCTACACCTGCGACGCCTTCGCTGCCCTG  
GAGAACGGACACACCTTACGCCGCTCGGATGAGCCTCAGTTCGAGCTGTGCTTCGGCGGA  
CAAAAGCAGTTCTGCAAATCGCATTACGCAGACTTGGACTCCCACTCGGACGACTTTGAT  
CCGGCCTCCACCAAGAGCAAGTACGGCTCCCTGGACTTCGACAGCTTGCTGCGGGAGGCC  
CAGCGCAGCCTCCGGAGG

>Tilapia\_PPARGC1A

ATGGCGTGGGACAGGTGTAACCAGGACTCGGTGTGGAGAGAATTAGAGTGTGCTGCCTTG

GTTGGTGAAGACCAGCCCCTCTGCCAGATTTACCTGAACTTGACCTCTCAGAGCTGGAT  
GTCAGTGACTIONTAGATGCAGACAGTTTCTGGGCGGCCTCAAATGGTACAGTGACCAATCA  
GAGATCATTTCTGCTCAGTATGGGAACGAAGCGGCCAATCTTTTTGAGATAGATGAAGAA  
AATGAGGCCAACTTGCTGGCAGTGCTTACAGAGACCCTGGACAGCATCCCGGTGGATGAG  
GACGGATTGCCTTCGTTTGAGGCCCTGGCAGATGGGGACGTGACCAATGCCAGTGACCAG  
AGCTGTCCCTCTCTCCGACGGCTCACCGCGCACCCAGAGCCCGAGGAGCCTTCCCTG  
CTGAAGAAACTCTTCTGGCACCCGAAACTCCCAGCTCAGCTATAATCAATACACAGGT  
GGCAAAGGCACAGAACCATGCAGCCAGCAGCAACCACCGGATCAGACCACCACCTGCCGTC  
GTCAAGACGGAGAGCCCCTGGAACGGCAAAGCAAGAGGGGGCTCCAGCCAACAGAACCGC  
CCGGTGAGGGCGCCCTGCACCGAGCTGCTGAAATACCTAACCGCCACCGATGACATTCTC  
CTCCACGCCAAAGCCAGCGAAGCCAAGAGCGCCTGGGGGGGTGCCAGTAGCAGGGAGAAG  
AGTGGCATGGGTCTCGGTGCCTCTTCTCCTCTTACCGTCCTCGTCATCCACCTCC  
TCGTTCTCCTCCCTCTCCTCCACCTCTTCTCCTCTTACCACCTCCAAGAAGAAG  
CCGGCTGTGCCGTCTCATCAACAGCAGCAGCAGCAGCCGCACAGCAGCATCACCAGCGA  
GCCAAACCAACCACCTTGCCACTTCTTTGACCCAGAGTCTCAAATGACTACAAGGGA  
TCACCGTTTGAGAACAAAACCACTGAACGCACATTAAGTGTGGAGATTGCTGGAATCCA  
GGTTTGACACCACCTACCACGCCCCACACAAAGCCAGTCAAGAGAATCCTTTCAAAGCA  
TCTCTCAAACCAAGTTGTCTTTCATGTTCTCCTCGGCCTTGGCATGCAAAAGAGCCAGG  
CTGAGTGAGTTGGGCCCCGGCGCTCTGGCCCCGGCCCCAGGTGCCTCAGGCAGGGGCCCC  
ACCAGGAAGGGTCTGAACAGACTGAGCTTTACGCCAGCTGAGCAAAGCAACCACCACC  
CTCCCTTACTCCGTCACTCAACACGCAGTGGGGGGCGGCCTTGAGGAGTATCGCAGACC  
GGCAACACTAAGCGGGCAACGCCCCGTAACACAGCGACCATGACTATTGCCAGGCAACA  
GCTGGTAATAAGAAGGATGGGGGCTCAGCCACTGTTACCACAACCGCAGCTGTGAAAATG  
ACATTCACCTCAGGTGCCACTGATGCTCCAGTGCCTGCTGAAGGTAAAGTGGAGAGCAGG  
CATGTGGAATGTAAGGATTCAGCCATGCCACCGTCATCTTCATCATTTCTCCATCATCA  
GCTTACCTGGTTTTTTGGCTAAACAGCAGAATTTGGGTCTGTGGATGGAGAGGGCGGGC  
CAGGTCCGGGGTTAGGGGAGCACGCCCTCACACAAACCGCTCAGATCCCCTACAAGAG  
GCCACTATTGACAGGGACCAACACAATCTTTGCGCCACCAGCCGAAAGCTCCTGTGCGAC  
CAGGAAATCCGAGCAGAACTTAACAAGCACTTTGGCTACCCTTTGCAAGCCCTCTACACC  
CCGGGTAGCCAGGAGAAAGAATCAAGCAGCAAACGAACAATGCTACAGCTCCTCAGTCC  
CTCAGAGGGGGGAGAGAATGACTGCTACCCCAAGAGGCTGCCTGCCTCCAGCTACCTTAC  
CCGGGGTTTTCTGGCCTTCCACGACGAACTAGAGCTGGACGAGAGCCGTGAAAGTCGCTTC  
CTCTTTCCATGGGAGGGCACCCCTCTGGATCTACTCTTTGACTGCGCCGCTGCTCTCCC  
TCTTCTCCCCACCATCCAGTGTCTCCCTTACAGAGGCTCTGTCTCTCCACCTCTCTCC  
CTGCTCCTGTACCCAGCAGACCTTCTGCTGGGCGGCAGCGGGTCCCGCTCCCGTTCC  
CGTTCCAGTCTGGGTCCCGCAGCTCCTCTTACGATACCGCAGGCGCTCTCTCTCCAGC  
TCACCCGATAGACGCCCGTCTCTCTGG

>Turkey\_PPARGC1A

ATGGCGTGGGACATGTGCAACCAGGACTCTGTATGGAGTGACATCGAGTGTGCTGCTCTG  
GTTGGTGAAGACCAGCCTCTCTGCCAGACCTCCAGAATTGACCTCTCCGAACTAGAT  
GTGAACGACCTGGATGCAGACAGCTTCTGGGGGGCTCAAGTGGTACAGCGACCAGTCT  
GAGGTCATCTCAACCAGTACAGCAATGAGCCTGCCAACATCTTTGAGAAAATAGATGAA  
GAGAATGAGGCAAACCTGCTAGCAGTCTCACTGAGACACTGGACAGCATCCCTGTGGAT  
GAGGATGGATTGCCTTCAATTGATGCACTGACAGATGGAGATGTGACCAATGAACATGAC

GCCAGCCCTTCCCGATGCCCGACGGCACCCCTCCGCCCCAGGAGGCAGAAGAGCCGTCT  
CTACTCAAGAAGCTCTTGCTGGCTCCAGCCAACACTCAGCTAAATTACAATGAATGCAGT  
GGTCTCAGCACACAAAACCATGCAAATACAAATCACAGGATCAGAACAAGCCCTGTGGTT  
GTTAAGACTGAGAATTCGTGGAGCAATAAAGCGAAGAGCATTGTCAACAACAAAAGCCA  
CAAAGACGTCCCTGCTCTGAACTTCTCAAATATCTGACTACGAATGATGACCCTCCTCAG  
AACAAACCAGCAGAGAACAGGAACAGCAGCAAAGAGAAATGCACCTCCAAAAGGAAGCCC  
CATCTGCAGTCTCAGACAAATCACCTGCAAGCCAAACCAACAAGTTTATCACTTCCGTTG  
ACGCTGAGTCTCCAAATGATCCCAAGGGTTCCCATTTGAGAACAAGACTATTGAACAA  
ACCTTAAGTGTGGAATCTCTGGAAGTGCAGGCCTAACTCCACCTACGACCCCTCCTCAT  
AAAGCCAACCAGGATAATCCTTTCAGGACTTCACCTAAGCCGAAGTCATCATGCAAGACT  
GTTGCACCACCTTCAAAAAGCCCCGTTATAGTGAGTCTTCCAGTTCTCAAGGAAACAAC  
CCAGTCAAGAAGGGTCCAGAACAGACTGAGCTGTATGCACAGCTTAGCAAGACTACAGCA  
CTGTCCAGTGGACATGAGGAGAGAAAGACAAAACGGCCCAGTTTGC GGCTGTTTGGTGAC  
CATGACTACTGTCAATCTGTGAATTCAAAGTCGAAATACACATTAATAATCCAGGAA  
CTTCAGGACTCCAGACAAGTAAATTAAGGATTCTTACCTGGGTGGCAGTGTGAGATT  
TGTTCTTCTTTAGAACAAGACCAGTATTTCAAGAAAGAGACTTTACAGACAAGTAAGCAG  
GGATCCCAAGGTAATAACAGAAAACAGCTCCAAGACCAAGAAATTCGGGCTGAACTGAAT  
AAGCATTTTGGTACCCCCAGCCAAGCTGTTTTTGTGTAAGAAGCAGATAAGACCGGTGAA  
CTAAGGGACAGTGATTACAGTAATGAACAATTTCCAAACTACCTATGTTTATAAATCA  
GGACTAGCAATGGATGGTCTCTTTGATGACAGTGAAGATGAAAGTGATAAACTATGCTAC  
CCTTGGGATGGGACACAAGCCTATTATTATTGACGTATCGCCTTCTTGCTCTTCTTTT  
AACTCTCCATGCAGAGATTAGTATCTCCACCCAAATCCTTATTTTCTCAAAGATCCCAA  
AGGACACGCTCTAGATCAAGGTCTTTCCTCAACGCAGGTCTTGTTCCTGTTCTCCATAT  
TCCCGATCGAGATCAAGGTACCCCTGTAGTAGATCCTCTTCAAGATCTTGCCACTGTTAT  
GAGTCCAGCCACTGTAGACACCAAGCACACCGAAGTTCTCCCTCACGTGCAAGGTGCGGA  
TCCAGATCACCGTACAGTCGACAGCCAGATATGACAGCTATGAGGAATATCAGCATGAA  
AGGCTGAAGAGGGAAGAATACCGCAAAGAGTATGAAAAACGGGAATCTGAAAGGGCCAAA  
CAAAGGGAGAGACAGAGGCAGAAAGCAATTGAAGAGCGTCGTGTGATTACGTGGGTAAA  
ATCAGACCTGACACAACCCGAAAAGAAGTGAAGGGACCGGTTTGAAGTTTTTGGTGAAATA  
GAGGAGTGCACAGTAAATTTGCGGGATGATGGAGACAGCTATGGTTTCATCACCTACCGC  
TATACTTGATGCCTTTGCTGCTCTTGAATGGATACACTTTACGCAGGTCAAATGAG  
CCTGACTTTGAGCTGTACTTTTGTGGACGCAAGCAGTTTTGCAAGTCTAACTATGCAGAC  
CTAGATCAAACCTCAGATGATTTGATCCTGCTTCCACTAAAAGCAAGTATGACTCCATG  
GATTTTGTAGTTTACTTAAAGAGGCACAACGGAGCCTGCGCAGG

>Zebra\_finch\_PPARGC1A

ATGGCGTGGGACATGTGCAACCAGGACTCTGTATGGAGTGATCTCGAGTGTGCTGCTCTG  
GTTGGTGAAGACCAGCCTCTTTGCCAGATCTCCAGAAGTGGACCTCTCTGAACTAGAT  
GTGAACGACCTGGATGCGGACAGCTTTCTGGGGGACTCAAGTGGTACAGCGACCAGTCA  
GAGATCATCTCCAATCAGTACAGCAATGAACCCGCAATATATTCGAGAAGCTAGATGAA  
GAGAGCGAGGCAAACCTGCTAGCTGTTCTCACTGAAACATTGGACAGCATCCCTGTGGAT  
GAGGATGGATTGCCTTATTGATGCACTGACAGATGGAGATGTGACCAACGAAAATGCC  
GCTAGCCCCTCCCAGTGCCCGACGGCGCCCTCCAACCTCAGGAGGCAGAAGAGCCGTCT  
CTACTTAAGAAGCTCTTGCTGGCTCCAGCCAACACTCAGCTAAATTACAATGAATGCAGT  
GGTCTCGGCACACAAAACCATGCAAACACTAATCACAGGATCAGAACAAGCCCTGTGGTT

GTAAAGACTGAGAATTCATGGAGCAATAAAGCGAAGAGCATTGTCAACAGCAAAGCCT  
CAAAGACGTCCCTGCTCTGAACTTCTCAAATATCTGACTACAAATGATGATCCTCCTCAC  
ACTAAACCAGCAGAGAACAGGAACAGCAGCAAAGAGAAATGCACCTCCAAAAGGAAGCCC  
CATCTGCAGTCTCAGACAAATCATCTGCAGGCCAAACCAACAAGTTTATCACTTCCATTG  
ACACCCGAGTCACCAAATGATCCCAAGGGTTCCCATTTGAGAACAAGACTATTGAACAA  
ACCTTAAGTGTGGAACCTCTGGAAGTGCAGGCCTAACTCCACCGACGACCCCTCCTCAT  
AAAGCCAACCAAGATAATCCTTTTAGGACTTACCTAAACTGAAGTCATCATGCAAGACT  
GTTGTACCACCTTCAAAAAAGCCCCGCTATAGTGAGTCTTCCAGTTCTCCAGGAAATAAC  
CCAATCAAGAAGGGTCCAGACGAGTCTGAGCTGTACCCACAGCTTAGCGAGACTACAGTA  
CTGTCCAGTGGACATGAGGAGAGAAAGACAAAACGGCCCAGTTTGC GGCTGTTTGGTGAC  
CATGACTACTGTCAATCTGTGAATTCAAAATCGGAAATACACATTAATAATATCCCAGGAA  
CTTCAGGACTCCAGACAACCAGAATTTAAGGATTCTTACCTGGGTGGCAGTGTGAGATT  
TGTTCTCTTTAGAACAAGACCAGAATTTCAAGAAAGAGACTTTACAGACAAATAAGCAG  
GGATCCCATGGTAATAACAGAAAACAGCTCCAAGACCAGGAAATTCGGGCTGAACTGAAT  
AAGCATTTTGGTCACCCAGCCAAGCTGTTTTTGTGTAAGAAGCAGATAAGAGCAGAGAA  
CTAAGGGACAGTGATTACAGTAATGAACAATCTCCAAACTACCTATGTTTATAAATTCA  
GGACTAGCAATGGATGGTCTGTTTGTGACAGTGAAGATGAAAGTGATAAACTATGCTAC  
CCTTGGGATGGGACACAAGCCTATTATTGATGTATCACCTTCTTGCTCTCTTTT  
AACTCTCCATGCAGAGATTCAGTGTCTCCACCCAAATCCTTATTTTCTCAAAGATCCCAA  
AGGACACACTCTAGATCAAGGTCTTTTCTCAACGCAGGTCTTGTTCCTGTTCTCCATAT  
TCCCGATCGAGATCAAGGTGCGCCTGTAGTAGATCCTCTTCAAGATCTTGTGCTATTGT  
GAGTCCAGCCACTGTAGACACCGAGCATAACAGAAAGTTCTCCCTTAGGTGGAAGATCGCGG  
TCCAGATCACCGTACAGTCGACAGCCAGATATGACAGCTATGAGGAATATCAGCATGAA  
AGGCTGAAGAGGGAAGAATACCGCAAAGAGTATGAAAAACGGGAATCTGAAAGGGCCAA  
CAAAGGGAGAGACAGAGGCAGAAAGCAATTGAAGAACGTCGTGTGATTATCTGGGTAAA  
ATCAGACCTGACACAACCCGAACAGAATGAGGGACCGGTTTGAAGTTTTTGGTGAAATT  
GAGGAGTGCACAGTAAATTTGCAGGATGATGGAGACAGCTATGGTTTCATCACCTACCGC  
TATACTTGTGACGCTTCTGCTGCTTGAATAATGGATACACTTTACGCAGGTCAAATGAA  
CCTGATTTGAGCTGTACTTCTGTGGACGCAAGCAGTTTTGCAAGTCTAACTATGCAGAC  
CTAGATTCAAACTCAGATGATTTGATCCTGCTTCTACTAAAAGCAAGTATGACTCCATG  
GATTTTGATAGTTTACTCAAAGAGGCCAGCGGAGCCTGCGTAGG

>Zebrafish\_PPARGC1A

ATGGCGTGGGACAGGTGTAATCAGGATTCGGTGTGGAGAGAACTAGAGTGCCTGCTG  
GTTGGTGAAGACCAGCCCTTTGCCCTGACCTGCCTGAGCTTGACCTTCTGAGCTGGAT  
GTCAGCGACCTCGACGCGGATAGCTTTCTGGGAGGACTCAAGTGGTACAGCGACCAATCA  
GAAATCATTTCAGTCAAGTATGGCAATGAAGCATCCAACCTGTTTGAGAAGATAGATGAG  
GAAAATGAGGCCAACTTGTGGCAGTGCTCACAGAAACCCTGGACAGTATCCAGTGGAT  
GAAGACGGGTTGCCTTCTGTTGAAGCCCTGGCAGATGGGGACGTGACCAATGCCAGTAT  
CAGAGCTGTCTTCTACCCCTGACGGCTCGCCACGCACCCAGAGCCAGAGGAGCCTTCC  
CTGCTGAAGAAGCTCCTCCTGGCCCTGCTAACTCCCAGCTCAGCTATAATCAATACCCA  
GGTGGCAAGGCACAGAACCATGCAGCCAGCAACCAACGGATCAGACCAGCACCTGCTGTT  
GCCAAGGTAGCTGCTCACCGCACTTCTTGCATCAAAGGCCTGACAGAAAACCCCTGGAAC  
AGCAAACACGAGGGGCTGTCCAACCGGTCCATGAGACGTCCCTGCACTGAGCTGCTC  
AAGTACCTCACCTTAGCGACGAGGCCTTCCAGACCAAAGCCGGTGAAGCCAAGAGCACC

TGGACAGGTTGCGGCAAGGACAGGGGAGGTGCTTGCATCTCATCCTGCTCGTCTTCTTCC  
TCTCCATCGTCTCGTCCACCTCCTCGTTCTCCTCCCTGTCGTCCTGCTCGTCTTCCACC  
GCCTCCAAAAGAAGACGTCTCTGCCTCCCCATCATCACAGCAGCAGCAGCTGGCAGTG  
CAGGCCAGCGAGCCAAACCAACCATCTTGCCACTTCCTTTGACCCAGAGTCTCCAAAT  
GACCACAAGGGATCTCCGTTTGAGAACAAAACCATTGAACGCACACTGAGTGTGGAGATC  
TGTGGAACCCAGGTCTGACACCCTACCACGCCTCCTCACAAGCCAGTCAAGAGAAC  
CCTTTCAAAGTACTCAAAAACAAGCTGTCTTCATGCTCTCCCTCGGCCCTGACAAGC  
AAAAGGCCCAGGCTGAGTAATGGGGCTCTTGCCCTCAGCCAACCAGCGGCTCTATTGGG  
AAGGGCCAGAGCAGACTGAGCTCTATGCCAGCTGAGCAAGGCGTCTCCACTATGCC  
CAAGGGGGCTTGAGGATCGTCGGGGCAAGCGGCCATGCCCGTGTCTTTGGCGATCAT  
GACTATTGCCAATCTACAAGCACAACGAGACAGCACCACCCAGCTGCAGTGGTACCC  
GGGCCAACAGAGGGCCGGCATGTGGAATGTAAAGACTTAAACATGCCAACCTCCACTACT  
ACGACATCATCGTTGTCTTCCACCCCCCTTCGTCTTCTCACTGGCCAGGCAGCTTCAA  
GGCCTTTCCCAACACCTCAGGAGGCTGTCCGGACACATATGCTCACGTGCAGCACCAC  
GACTCAAGCTCCAAAATGACAATGGACTGCAGTTCTGGTGGCAGGAACTTCTTAGGGAC  
CAGGAGATCCGGGACGAGCTCAACAAGCACTTTGGAAAGCCTCAGCAAGCCTTCTATAGC  
GGGGTAGTGGGAGAGCCGAGGGGCAAACAGCCAATTGAGGACAGTACTCTGGGGATGAG  
TACCCGGGTCTACTCGGCGACTACATCCACCCAGGTCTGCCTGATTCGAGGACCTGGAG  
GTAGGCCGGGAGCGCCTGTTCTACTTGGGGGAAGGTTCTCCACTCGAGCTGCTCCTCGAA  
GGGTCACCCTCCAGCTCCCCTTCCAGCAGTTCTTTTCATGGTGTCTGTCTCGCCTCCT  
TCCTCTCAGCTCTCCCCACAGCACCTCCGCTGGCCAGCTCCATCTCCCGCTCCCGTTCT  
CGTTCTCATCTCACACAGGCGCAGATCCCTCTCCAGGTCTCCCTACTCCCGCTCCGGG  
TCTCCAGCAGCCGTTCTCCCTCTTGCTCCTCGCAACATGGACGAAAGCACTTTCACT  
CCCAGGATTTGTGGAACCCTCAGTCCCAGTCGATTCTTTTTGGTGGGAGACCCAGG  
TATGACAGCTATGAGGAATACCAGCACGAGCGTCTGAAGCGAGAGGAGTACCGACGCGAC  
TATGAGAAACGGGAATGTGAGAGGGCCGAGCAGAGGGAGAGACAACGGCAAAAAGCAATA  
GAGGAGAGGCGAGTGGTGTATGTGGGACGTCTTCGCGCCGACAGCACACGCACCGAGCTC  
AAACGCCGCTTTGAAGTCTTCGGCGAGATTGAGGAGAGCACAGTCAACCTGAGACATGAC  
GGGGATAACTTTGGCTTCATCACCTACCGCTACACTTGTGATGCTCTCGCTGCCCTTGAG  
AATGGACACACTTTGCGCAGGTGCAACGAACCTCACTTTGAGCTCTGCCTTGGTGGACAA  
AAGCAGTACAGCAAATCCAATTACACAGACTTGGATTCCCACTCTGACGACTTTGATCCA  
GCCTCCACTAAAAGCAAGTACGACTCCATGGATTCGACAGCTTGTTCGAGAAGCCAG  
TACAGCCTGAGAAGG

>Pig\_PPARGC1A

ATGGCGTGGGACATGTGCAACCAGGACTCTGTATGGACTGACATCGAGTGTGCTGCTCTG  
GTTGGTGAAGACCAGCCTCTTTGCCAGATCTTCTGAACTTGACCTTTCTGAACTAGAC  
GTGAACGACTTGGATACAGACAGCTTCTGGGTGGACTCAAGTGGTGCAGTGACCAATCA  
GAAATAATATCCAATCAGTACAACAATGAGCCTTCAAACATATTTGAGAAGATAGATGAA  
GAGAATGAGGCAAACCTTGTAGCAGTTCTCACAGAGACGCTGGACAGTCTCCCTGTGGAT  
GAAGACGGATTGCCCTCATTGATGCACTGACAGATGGAGATGTGACCACTGAGAATGAG  
GCTAGTCCTTCTCCATGCCTGACGGCACCCCTCCGCTCAGGAGGCAGAAGAGCCGTCT  
CTACTTAAGAAGCTCTTACTGGCACCAGCCAACACTCAGCTAAGTTATAATGAATGCAGT  
GGTCTCAGTACCCAGAACCATGCAAAACCAATCACAGGATCAGAACAACCCCTGCAGTT  
GTTAAGACCGAGAATTCATGGAGCAATAAAGCGAAGAGCATTGTCAACAGCAAAAAGCCA

CAAAGACGTCCATGCTCCGAGCTTCTCAAGTATCTGACCACAAATGATGACCCTCCTCAC  
ACCAAACCCACAGAGACCCGAAACAGTAGCAGAGACAAGTGCACCTCCAAAAAGAAGGCC  
CACACACAATCGCAGTCGCAACATTTACAAGCCAAACCAACATCTTTATCTCTTCCTCTG  
ACCCCAGAGTCACCAATGACCCCAAGGGTCCCATTTGAGAACAAGACTATTGAACGA  
ACCTTAAGTGTGAACTCTCTGGAAGTGCAGGCCTAACTCCACCCACAACCTCCTCCTCAT  
AAAGCCAACCAAGATAACCCTTTTAGGGCTTCTCAAAGCTGAAGCCCCCTTGCAAGACT  
GTGGTACCTCCGCCATCGAAGAAGACCCGGTACAGTGAGTCTTCGGGGACCCACGGCAAC  
AACTCCACCAAGAAAGGGCCCCGAGCAGTCCGAGCTGTACGCGCAGCTCAGCAAGACGTCC  
GCGCTCGGCGGCGACACGAGGAACGGAAGGCCAGGCGGCCAGTCTGCGGCTATTTGGT  
GACCATGACTATTGTCAGTCGATTAATTCAAAGCGGAAATCCTCATCAATATATCGCAG  
GAGCTCCACGACTCCAGACAAGTACTCTAAAGATGCCGCTCTGACTGGCAGAGGCAG  
ATGTGTTCTTCCACAGACTCAGACCAGTGTACCTGACCGAGACGTCGGAGGCGAGCAGG  
CAGGTCTCTCCGGGACGCGCCGAAAACAGCTCCAAGACCAGGAAATCCGAGCCGAGCTG  
AACAAAGCACTTCGGTCATCCAGTCAAGCTGTTTTTGACGACGAAGCAGACAAGACCAGT  
GAACTGAGGGACAGTGATTTAGTAACGAACAATTCTCAAACCTACCTATGTTTATAAAT  
TCAGGACTAGCCATGGATGGCTGTTTGATGACAGCGAAGATGAAAGTGATAAACTGAAC  
TCCCCTGGGATGGCAGCAGTCTATTGTTTCGATGTGTCGCCTTCTTGTCTTCT  
TTAACTCTCCGTGTAGAGATTCGGTATCACCACCCAAATCCTTATTTCTCAAAGACCC  
CAAAGGATGCGCTCTCGTTCAAGTCTTTTCTCAACACAGGTCGTGTTCTCGATCACCA  
TATCCAGGTCAAGATCAAGGTCCCAGGCAGTAGATCCTCTTCAAGATCTTGCTACTAC  
TCTGAGTCAGGCCACTGCAGACACCGCACGCACCGAAATTCTCCCCTGTGCGCCAGATCA  
CGTTCAAGATCTCCCTACAGCCGGCGGCCAGGTATGACAGCTACGAGGAATATCAGCAC  
GAGAGGCTGAAGAGGGAAGAATACCGCAGAGAGTATGAGAAGCGGGAGTCTGAAAGGGCC  
AAGCAGAGGGAGAGGCAGAGGCAGAAGGCAATTGAAGAACGTCGTGTGATTTATGTTGGT  
AAAATCAGACCTGACACAACACGGACAGAAGTGGGGACCGTTTTGAAGTTTTTGGTGAA  
ATTGAGGAGTGCACAGTAAATCTGCGGGATGATGGAGACAGCTATGGTTTCATTACCTAC  
CGTTATACCTGTGATGCTTTTGTGCTCTTGAAAATGGATACACTTTGCGCAGGTGCAAT  
GAAACTGACTTCGAGCTGTACTTTTGTGACGCAAGCAATTTTCAAGTCTAACTATGCA  
GACCTAGATTCAAATTCAGATGACTTTGATCCTGCTTCCACCAAGAGCAAGTATGACTCT  
CTGGATTTGATAGTTTACTGAAAGAAGCTCAGAGAAGCTTGCAGG

>Elephant\_PPARGC1A

ATGGATGAGACCTCTCCAGGCTGGATGAAGACTGGAAAAAGGACTTCAGCGAGAAGCA  
AGCTGGCCGTGTGCTGCTCTGGTTGGTGAAGACCAGCCTCTTTGCCAGATCTTCTGAA  
CTTGACCTTTCTGAACTAGACGTGAACGACTTGGATACAGACAGCTTTCTGGGTGGACTC  
AAGTGGTGCAGTGACCAATCAGAAATAATTTCCAACCAGTACAACAATGAGCCTTCAAAT  
ATATTTGAGAAGATAGATGAAGAGAGTGAGGCAAACCTTGCTAGCAGTCCTCACAGAGACA  
CTGGACAGTCTCCCTGTGGATGAAGACGGATTGCCCTCGTTTGATGCGCTGACAGATGGA  
GATGTGACCACTGACAATGACGCTAGTCTTCTCTATGCCCGACGGCACCCCTCCGCCT  
CAGGAGGCAGAAGAGCCATCTCTACTTAAGAAGCTTCTACTGGCACCAGCCAATACTCAG  
CTAAGTTATAGTGAATGCAGTGGTCTCAGTACCCAGAACCATGCAAACCATAATCACAGG  
ATCAGAACAACCCCTGCAGTTGTTAAGACCGAGACTTCATGGAGCAATAAAGCAAAGAGC  
ATTTGTCAACAGCAAAAGCCACAAAGACGTCCCTGCTCCGAGCTTCTCAAGTATCTGACC  
ACAAACGATGACCCTCTCACACCAAAACCCACAGAGAACAGAAAACAGCCACAGAGACAAA  
TGCACCTCGAAAAAGAAGCCCCACACACAGTCGAGGTGCCATTTACAAGCCAAACCA



ACAAC TTTATCTCTTCCTCTGACCC CAGAGTCACCAAATGACCCCAAGGGTTCCCCATTT  
GAGAACAAGACTATTGAACGAACCTTAAGTGTGGA ACTCTCTGGA ACTGCAGGCCTAACT  
CCACCCACA ACTCCTCCTCATAAAGCCAACCAAGATAACCCTTTTAGGACTTCTCCAAAA  
TTGAAGTCTCTTGCAAGACTGTGGTACC ACTACCATCAAAGAAGCCCCGGCATAGCGAG  
TCTTCTGGTACCCAAGGAAACA ACTCCACCAAGAAAGGTCCCAAGCAATCTGAGTTGTAC  
GCACA ACTCAGCAAGACCTCGGTACTCACCAGTGGACACGAGGAAAGGAAGACCAAGCGG  
CCCAGTCTGCGGTTGTTTGGTGACCATGACTATTGTCAGTCAATTAATTCCAATCGGAA  
ATACTCATTAATATATCACAGGAGCTCCAAGACTCTAGAAA ACTAGAATATAAAGATGCC  
TCCAGTGATTGGCAGGGGCAGATTTGTTCTTCCACAGACTCAGACCAGTGCTACCTGAGA  
GAGACTTTGGAGGCCAGCAAGCAAGTCTCTCCTGGCAGCACCAGAAAACAGCTCCAAGAC  
CAGGAAATCCGAGCCGAGCTGAACAAGCACTTTGGTCATCCAGTCAAGCTGTTTTTGAC  
GACGAAGCAAACAAGACCAGTGA ACTGAGGGACAGTGATTTTAGTAATGAACAATTCTCC  
AAACTACCTATGTTTATAAATTCAGGACTAGCCATGGATGGCATGTTTGAGGACAGCGAA  
GATGAAAGTGATAA ACTGAGCTACCCTTGGGATGGCACGCAATCCTATTATTGTTTCGAT  
GTGTGCGCTTCTTGCTCTTCATTTAACTCTCCGTGTAGAGATTCCGTGTCGCCACCCAAA  
TCCTTATTTTCTCAAAGACCCCAAAGGATGTGCTCTCGTTCAAGGTCCTTTTCTCGACAC  
AGGTCCTGTTCCCGGTCACCGTATTCCAGGTCAAGATCTAGGTCCCCAGGCAGTAGATCC  
TCTTCAAGATCTTGCCACTACTGTGAGTCAAGCCACTGCAGACACCGCACGCACCGAAAT  
CCTCCCTGTGCGGGAGATCACGCTCCAGATCACCTGCAGCCGTAGGCCCAGGTATGAC  
AGCTACGAGGAGTATCAGCACGAAAGGCTGAAGAGGGAAGAATACCGCAAAGAGTATGAG  
AAGCGGGAGTCTGAAAGGGCCAAACAAGGGAGAGACAGAGGCAGAAGGCAATTGAAGAA  
CGCCGTGTGATATATGTTGGTAAAATCGGATCTGACACAACACGGACAGAACTGAGGGAC  
CGTTTTGAAGTTTTTGGTGA AATTGAGGAGTGACAGTAAATCTGCGGGATGATGGAGAC  
AGCTATGGTTTCATTACCTACCGTTATACCTGCGATGCTTTTGCTGCTCTTGAAAATGGA  
TACACTTTGCGCAGGTGCAATGAAACTGACTTCGAGCTGTACTTTTGTGGACGCAAGCAA  
TTTTTCAAGTCTAACTATGCAGACCTAGATTCAAACTCTGATGACTTTGACCCTGCTTCC  
GCCAAGAGCAAGTATGACTCTCTGGATTTTCGATAGTTTACTGAAAGAGGCTCAGAGAAGC  
TTACGCAGG

>Chicken\_PPARGC1A

ATGGCGTGGGACATGTGCAACCAGGACTCTGTATGGAGTGACATCGAGTGTGCTGCTCTG  
GTTGGTGAAGACCAGCCTCTTTGCCAGATCTCCAGA ACTTGACCTCTCCGA ACTAGAC  
GTGAACGACCTGGATGCAGACAGCTTCTGGGGGGCTCAAGTGGTACAGCGACCAGTCT  
GAGGTCATCTCCAGCCAGTACAGCAATGAGCCTGCCAACATCTTTGAGAAAATAGATGAA  
GAGAATGAGGCAA ACTTGCTAGCAGTTCTCACTGAGACTGGACAGCATCCCTGTGGAT  
GAGGATGGATTGCCTTCATTTGATGCACTGACAGATGGAGATGTGACCAATGAACATGAC  
GCCAGCCCTTCCCCGATGCCCGACGGCACCCCTCCGCCCCAGGAGGCAGAAGAGCCGTCT  
CTACTCAAGAAGCTCTTGCTGGCTCCAGCCAACACTCAGCTAAATTACAATGAATGCAGT  
GGTCTCAGCACAAAAACCATGCGAACAAAAATCACAGGATCAGAACAAGCCCTGTGGTT  
GTTAAGACTGAGAATTCGTGGAGCAATAAAGCGAAGAGCATTGTCAACAACAAAAGCCA  
CAAAGACGTCCCTGCTCTGAACTTCTCAAATATCTGACTACGAACGATGACCCTCCTCAG  
ACCAAACCAGCAGAGAACAGGAACAGCAGCAAAGAGAAATGCACCTCCAAAAGGAAGCCC  
CATCTGCAGTCTCAGACAAACCACCTGCAAGCCAAACCAACAAGTTTATCACTTCCATTG  
ACACCTGAGTCTCAAATGATCCCAAGGGTTCCCCATTTGAGAACAAGACTATTGAACAA  
ACCTTAAGTGTGGA ACTCTCTGGA ACTGCAGGCCTAACTCCACCTACGACCCCTCCTCAT

AAAGCCAACCAAGATAATCCTTTCAGGACTTCACCTAAGCCGAAGTCATCATGCAAGACT  
GTTGCACCACCTTCAAAAAAGCCCCGTTATAGTGAGTCTTCCGGTTCTCAAGGAAACAAC  
CCTGTCAAGAAGGGTCCAGAACAGACTGAGCTGTATGCACAGCTTAGCAAGACTACAGCA  
CTGTCCAGTGGACATGAGGAGAGAAAGACAAAACGGCCCAGTTTGC GGCTGTTTGGTGAC  
CATGACTATTGTCAATCTGTGAATTCAAAGTCGGAAATCCACATTAATAATATCCAGGAA  
CTTCAGGACTCCAGACAAGTAAAGGATTCTTACCTGGGTGGCAGTGTCAGATT  
TGTTCTTCTCTAGAACAAGACCAGTATTTCAAGAAAGAGACTTTACAGACAAGTAAGCAG  
GGATCCCAAGGTAATAACAGAAAACAGCTCCAAGACCAGGAAATTCGGGCTGAACTGAAT  
AAGCATTTTGGTCACCCCAGCCAAGCTGTTTTTGATGAAGAAGCAGATAAGACCGGTGAA  
CTAAGGGACAGTGATTACAGTAATGAACAATTTTCCAACTACCTATGTTTATAAATCA  
GGACTAGCAATGGATGGTCTCTTTGATGACAGTGAAGATGAAAGTGATAAACTATGCTAC  
CCTTGGGATGGCACACAATCCTATTATTGACGTATCGCCTTCTTGCTCTTCTTTT  
AACTCTCCATGCAGAGATTAGTATCTCCACCCAAATCCTTATTTTCTCAAAGATCCCAA  
AGGACACGCTCTAGATCAAGGTCCTTTCCTCAACGCAGGTCTTGTCCCGTTCTCCATAT  
TCCCGATCGAGATCAAGGTCACCCTGTAGTAGATCCTCTTCAAGATCTTGTCAGTGTAT  
GAGTCCAGCCACTGTAGACACCGAGCACACCGAAGTTCTCCCTCACGTGCAAGATCGCGA  
TCCAGATCACCGTACAGTCGCAGACCCAGATATGACAGCTATGAGGAATATCAGCATGAA  
AGGCTGAAGAGGGGAAGAATACCGCAAAGAGTATGAAAAACGGGAATCTGAAAGGGCCAAA  
CAAAGGGAGAGACAGAGGCAGAAAGCAATTGAAGAGCGTCGTGTGATTACGTGGGTAAA  
ATCAGACCTGACACAACCGAAAAGATCTGAGGGACCGGTTTGAAGTTTTTGGTGAAATC  
GAGGAGTGCACAGTAAATTTGCGGGATGATGGAGACAGCTATGGTTTCATCACCTACCGC  
TATACTTGTGATGCCTTTGCTGCTCTTGAGAATGGATACACTTTACGCAGGTCAAACGAG  
CCTGACTTTGAGCTGTACTTTTGTGGACGCAAGCAGTTTTGCAAGTCTAACTATGCAGAC  
CTAGATCAAACCTAGATGATTTTATCCTGCTTCCACTAAAAGCAAGTATGACTCCATG  
GATTTTGATAGTTTACTTAAAGAGGCACAGCGGAGCCTGCGCAGG

>Rock\_pigeon\_PPARGC1A

ATGGCGTGGGACATGTGCAACCAGGACTCTGTATGGAGTGATCTGGAGTGTGCTGCTCTG  
GTTGGCGAAGACCAGCCTCTTTGCCCGGATCTCCAGAAGTACCTCTCCGAATTAGAT  
GTGAACGACCTGGATGCAGACAGCTTTCTGGGAGGACTCAAGTGGTACAGCGACCAGTCA  
GAGATCATCTCAATCAATACAGCAATGAACCTGCCAACATATTCGAGAAGATAGATGAA  
GAGAGTGAGGCAAACCTGTAGCCGTTCTCACTGAAACTGGACAGCATCCCTGTGGAT  
GAGGATGGGTTGCCTTCATTTGATGCACTGACAGATGGAGATGTGACCAACGAAAATGCC  
GCTAGCCCTTCCCAATGCCGACGGCACCCCTCAAACCTCAGGAGGCAGAAGAGCCGTCT  
CTACTTAAGAAGCTCTTGCTGGCTCCAGCCAACACTCAACTAAGTTACAATGAATGCAGT  
GGTCTCAGCACACAAAACCATGCAAACACTAATCACAGGATCAGAACAAGCCCTGTGGTT  
GTTAAGACTGAGAATTCATGGAGCAATAAGGCGAAGAGCATTGTCAACAGCAAAGCCT  
CAAAGACGTCCCTGCTCTGAACTTCTCAAATATCTGACTACAAATGATGACCCTCCTCAG  
ACCAAACCAGCAGAGAACAGGAACAGCAGCAAAGAGAAATGCACCTCCAAAAGGAAGCCT  
CATCTGCAGACTCAGACAAATCATCTGCAAGCCAAACCAACAAGTTTATCACTTCCATTG  
ACACCCGAGTACCAAATGATCCCAAGGTTCCCCATTTGAGAACAAGACTATTGAACAA  
ACCTTAAGTGTGGAACCTCTGGAAGTGCAGGCCTAACTCCACCTACGACCCCTCCTCAT  
AAAGCCAACCAGGATAATCCTTTTAGGACTTCACCTAAGCCGAAGTCATCATGCAAGACT  
GTTGTACCACCTTCAAAAAAGCCCCGCTATAGTGAGTCTTCTGGTTCTCAAGGAAATAAC  
CCAACCAAGAAGGGTCCAGAACAGTCTGAGCTGTATGTACAGCTTAGCAAGACTACAGGA

CTGTCCAGTGGACATGAGGAGAGAAAGACAAAACGGCCCAGTTTGC GGCTGTTTGGTGAC  
CATGACTACTGTCAATCTGTGAATTCAAATCGGAAATACACATTAATATCCCAGGAA  
CTTCAGGACTCCAGACAAGTAAAGGATTCTTACCTGGGTGGCAGTGTGAGATT  
TGTTCTCTTTAGAACAAGACCAGTATTTCAAGAAAGAGACTTTACAGACAAGTAAGCAG  
GGATCCCATGGTAATAACAGAAAACAGCTCCAAGACCAGGAAATTCGGGCTGAACTGAAT  
AAGCATTTTGGTCACCCAGCCAAGCTGTTTTGATGAAGAAGCAGATAAGACAAGAGAA  
CTAAGGGACAGTGATTACAGTAATGAACAATTCTCCAACTACCTATGTTTATAAATCA  
GGACTAGCAATGGATGGTCTCTTTGATGACAGCGAAGATGAAAGTGATAAACTATGCTAC  
CCTTGGGATGGGACACAAGCCTATTCATTATTTGATGTATCGCCTTCTTGCTCTCTTTT  
AACTCTCCATGCAGAGATTAGTGTCTCCACCCAAATCCTTATTTTCTCAAAGATCCCAA  
AGGACTCTCTAGATCAAGGTCCTTCTCAACGCAGGTCTTGTCCCGTTCTCCATAT  
TCCCGATCGAGATCAAGGTCACCTGTAGCAGATCCTCTTCAAGATCTTGTGCTATTAT  
GAGTCCAGCCACTGTAGACACCGAGCACACAGAAGTTCTCCCTCACATGCAAGATCGCGA  
TCCAGATCACCGTGCAGTGCAGACCCAGATATGACAGCTATGAGGAATATCAGCATGAA  
AGGCTGAAGAGGGAAGAATACCGCAAAGAGTATGAAAAACGGGAATCTGAAAGGGCCAAA  
CAAAGGGAGAGACAGAGGCAGAAAGCAATTGAGGAACGTCGTGTGATTTATCTGGGTA  
ATCAGACCTGACACAACCCGAACAGAAGTGAAGGACCGGTTCAAGTTTTTGGTGAAAT  
GAGGAGTGCACAGTAAATTTGCAGGATGATGGAGACAGCTATGGTTTCATCACCTACCGC  
TATACTTGTGACGCCTTTGCTGCTTTGAAAATGGATACTTTACGCAGGTCAAATGAA  
CCTGACTTTGAGCTGTACTTTTGTGGACGCAAGCAATTTGCAAGTCTAACTATGCAGAC  
CTAGATCAAACCTAGATGATTTTGTCTGCTTCACTAAAAGCAAGTATGACTCCATG  
GATTTTGTAGTTTACTTAAAGAGGCACAGCGGAGCCTGCGTAGG

>Flycatcher\_PPARGC1A

ATGGCTGGCTGCGGGCTGTCGGAAGACGCTTGTCTCTCTCTCTTTTACAACCTACACC  
TCCTCCTGGGAGACCTCCTACAACCAGTGTGCTGCTCTGTTGGCGAAGACCAGCCTCTT  
TGCCCAGATCTCCAGAACTTGACCTCTGAACTAGATGTGAACGACCTGGATGCAGAC  
AGCTTTCTGGGGGGGCTCAAGTGGTACAGTGACCAGTCAGAGATCATCTCAACCAGTAC  
AGCAATGAACCCGCCAATATATTCGAGAAGATAGATGAGGAGAGCGAGGCAAACCTTGCTA  
GCTGTTCTACTGAAACTGGACAGCATCCCTGTGGATGAGGATGGATTGCCTTCCTTT  
GATGCACTGACAGATGGAGATGTGACCAACGAGAATGCGGCCAGCCCCTCCCGCTGCC  
GACGGCGCCCCGCTCCGGAGGCAGAAGAGCCGTCTACTTAAGAAGCTCTTGCTG  
GCTCCAGCCAACACTCAGCTAAATTACAATGAATGCAGTGGTCTCAGCACACAAAACCAT  
GCAAACACTAATCACAGGATCAGAACAAGCCCTGTGGTTGTTAAGACTGAGAATTCATGG  
AGCAATAAAGCGAAGAGCATTGTCAACAGCAAAGCCTCAAAGACGTCCTGCTCTGAA  
CTTCTCAAATATCTGACTACGAATGATGATCCTCCTCAGACCAAACCAGCAGAGAACAGG  
AACAGCAGCAAAGAGAAATGCACCTCCAAAAGGAAGCCCCATCTGCAGTCTCAGACAAAT  
CATCTGCAGGCCAAACCAACAAGTTTATCACTTCCATTGACACCCGAGTCACCAAATGAT  
CCCAAGGGTTCCCATTTGAGAACAAGACTATTGAACAAACCTTAAGTGTGGAACCTCT  
GGAAGTGCAGGCCTAACTCCACCTACGACCCCTCCTATAAAGCCAACCAAGATAACCCT  
TTTAGGACTTCACTAACTGAAGTCATCATGCAAGACTGTTGTACCACCTTCAAAAAAG  
CCCCGCTATAGTGAGTCTTCCGTTCTCAAGGAAATAACCAACCAAGAAGGGTCCAGAA  
CAGTCTGAGCTGTACACACAGCTTAGCAACACTACAGTACTGTCCAGTGGACATGAGGAG  
AGAAAAGACAAAACGGCCAGTTTGC GGCTGTTTGGTGACCATGACTACTGTCAATCTGTG  
AATTCAAAATCGGAAATACACATTAATATCCCAGGAACTCAGGACTCCAGACAACCA

GAATTTAAGGATTCTTCACCTGGGTGGCAGTGTGAGATTTGTTCTTCTTTAGAACAAGAC  
CAGTATTTCAAGAAAGAGACTTTACAGACAAATAAGCAGGGATCCCATGGTAATAACAGA  
AAACAGCTCCAAGACCAGGAAATTCGGGCTGAACTGAATAAGCATTGTTGGTCACCCAGC  
CAAGCTGTTTTGATGAAGAAGCAGATAAGACCAGAGAACTGAGGGACAGTGATTACAGT  
AATGAACAATTCTCCAACTACCTATGTTTATAAATTCAGGACTAGCAATGGATGGTCTG  
TTTGATGACAGTGAAGATGAAAGTGATAAACTATGCTACCCTTGGGATGGGACACAAGCC  
TATTCATTATTTGATGTATCACCTTCTTCTCTTTTAACTCTCCGTGCAGAGATTCA  
GTGTCTCCACCCAAATCCTTATTTTCTCAAAGATCCCAAAGGACAGGCTCTAGATCAAGG  
TCCTTACCTCAACGCAGGTCTTGTTCCTGTTCTCCATATTCCCGATCGAGATCAAGGTCG  
CCCTGTAGTAGATCCTCTTCAAGATCTTGTGCTATTGTGAGTCCAGCCACTGTAGACAC  
CGAGCAAACAGAAGCTCTCCCCTAGGTGGAAGATCACGGTCCAGATCCCCGTGCAGTCGC  
AGACCCAGATATGACAGCTATGAGGAATATCAGCATGAAAGGCTGAAGAGGGAAGAATAC  
CGCAAAGAGTATGAAAAACGGGAATCTGAAAGGGCCAAGCAAAGGGAGAGACAGAGGCAG  
AAAGCAATTGAAGAACGTCGTGTGATTTATCTGGGTAAAATCAGACCTGACACAACCCGA  
ACAGAACTGAGGGACCGTTTTGAAGTTTTTGGTGAATGAGGAGTGCACAGTAAATTTG  
CAGGATGATGGAGACAGCTATGGTTTCATCACCTACCGCTATACTTGTGACGCCTTCGCT  
GCTCTTGAATGGATACACTTTACGCAGGTCAAGCGAGCCTGATTTTGAGCTGTACTTC  
TGTGGACGCAAGCAGTTTTGCAAGTCTAACTATGCAGACCTAGATTCAAACCTAGATGAT  
TTTGATCCTGCTTCCACTAAAAGCAAGTATGACTCCATGGATTTGATAGTTTACTTAGA  
GAGGCCAGCGGAGCCTGCGTAGG

>Anole\_lizard\_PPARGC1A

ATGGATGAAACACGCACGAGGGAGAATAAGGACTTGGAGGAAGACTGGATAAAAGGGCTG  
CGGCGGGAACCTAGCTGGCAGTGTGCTGCTCTGGTTGGTGAAGACCAGCCTCTTTGCCCA  
GATCTTCCAGAACTTGACCTGTGAGAGTTAGACGTGAACGACTTGGATGCTGACAGTTTT  
TTGGGTGGACTCAAATGGTACAGTGACCAATCAGAAATAATTTCCAATCAGTACGCCAAT  
GAATCATCAAACATCTTCGAGAAGATAGATGAAGAGAATGAAGCAAACCTTGCTAGCAGTT  
CTCACAGAGACATTGGACAGTATCCCTGTGGATGAAGATGGATTGCCTTCATTTGATGCA  
CTGACAGATGGAGATGTGACCAACGAAAATGATGCTAGCCCTCACCAATGCCTGACGGC  
ACCCCTCCAGCACAGGAGGCAGAAGAGCCGTCTCTACTTAAGAAGCTTTGTTGGCACCA  
GCTAACATCCAGCTAAATTACAATGAATGCAGTGGCCTCAGCACGCACAACCATGCAAAT  
GCCAATCATAGGATCAGAACAAGCCCTGTGGTGGTTAAGACTGAGAATTCATGGAGCAAT  
AAGACAAAGAGCATTGTCAACCACAAAAACCACAAAGACGTCAATGCTCAGAGCTTCTC  
AAGTATCTGACCACCAACGATGACCCTCCACAGACCAAACCAACAGAGAACAGGAACAGC  
AGCAGAGACAAATGCACCTCTAAAAAGAAGGTGCTCTTGCCTCTCAGATGCATCATTTG  
CAAGCCAAACCAATGAGTTTATCGCTTCTTTGACGCCCGAGTCACCAAATGATCCCAAG  
GGTTCCCATTTGAGAACAAGACTATTGAACAACTTTAAGTGTGGAACTCTCTGGAAT  
GCAGGCCTAACTCCGCCTACAACCCCTCCTCACAAGCGAACCAAGACAACCCCTTTTAGG  
ACTTACCAAAGCCAAAGTCGTCATGCAAGACTGTTATGCCACCTTCAAAAAACCCCGC  
TGCAATGAGTCTTCCAGCTCTCAAGGACATAATTTAGGTCGGAAGGGTCCAGAGCAGTCA  
GAGCTGTATGCACAGCTTAGTAAGACGACCGTGTCTGTGTTAGTCATGAGGAGAGGAAG  
ACAAAGCGGCTGGTTTTCGGCTGTTTGGTGACCATGACTACTGTCAATCTGCTAATTCA  
AAAACAGGAATACGCATCAACAGATCCCAGGAACCTCAGGATTCCAGACAAGTAGATTTA  
AATGGTGGGTTGCCTGAGCAGTGGTGTATTTGTTCTTTTGAACAATACAATCAA  
TATGACAAGAGAGAGACTTCACAGGCAAGCAAGCAGGATTTGCAATTCACAACCGCAA

CTGCTCCAAGACCAAGAAATCCGAGCTGAACTCAACAAGCACTTTGGTCACCTTAGCCAA  
GCTGTTTTTGGAGGAAGAGACCACCAAGATCAGTGAAGTGGGACAACAGTAATTTAGT  
GATGAACAATTCTCCAACTACCTATGTTTATAAATTCTGGACTAACAATGGATGGTCTT  
TTTGATGATAGCGAAGATGAAAATGACAACTATGTTGCTCGTGGGATGGAACACAGGCC  
TACTACTGTTTGACCTGTCACCATCTTGCTCATCCTTTAATTCTCCATGCGGAGATTCA  
GTGTCTCCACCTAAATCCCTTCTTTCTCAAAGATTCCAAAGGATACGCTCTCGATCACGG  
TCCTCCCTCAGCACAGGTCTTGTCCATTCTCCATATTCCCGATCAAGATCAAGGTCA  
CCATGCAGTAGATTCTCTCAAGATCTTGTTACTATTATGAGTCCAGTCATTGTAGACCG  
CAGGCATATAGAAGTTCTCCCTGTATTCAAGATCACGATCCAGATCACCATATAGCCAT  
AGACCCAGATATGACAGCTATGAGGAATATCAGCATGAAAGGCTGAAGAGGGAAGAATAC  
CGCAAAGAATATGAAAAACGGGAATCTGAAAGGGCCAAACAAGAGAGCGACAGAAGCAG  
AAAGCAATTGAAGAACAGCGTGAATTTATGTTGGCAAATGGGCCTGACACAACCCGA  
GCAGAACTAAGGGACCGTTTTGAAGTTTTTGGTGAATGAGGAGTGCTCTGTGAATCTA  
CAGGACAATGGAGATAACTATGTTTTATCACCTACCGCTACACTTGTGATGCTTTTGT  
GCTCTGGAAAATGGATACTCTGCGCAGAACCAATGAGCCTGACTTTGAGCTGTATTTT  
TGTGGACAAAAGCAATTTGCAAGTCTAACTATGCAGACCTAGATTCAAATTCAGACGAT  
TTTGATCTGCTTCTACTAAGAGCAAGTATGACTCCATGGATTCGACAGTTTACTTAA  
GAGGCACAGCGAAGCTTGCGGAGG

>Great\_tit\_PPARGC1A

ATGGCTGGCTGCGGGCTGTGCGAAGACACTTGTTTTCTCCTCTTTTACAACCTACACC  
TCCTCCTGGGAGACCTCTACAACAGTGTGCTGCTGTTGGCGAAGACCAGCCTCTT  
TGCCAGATCTCCAGAACTTGACCTCTCTGAACTAGATGTGAACGACCTGGATGCAGAC  
AGCTTTCTGGGGGGACTCAAGTGGTACAGCGACCAGTCAGAGATCATCTCCAATCAGTAC  
AGCAATGAGCCCGCAATATATTTGAGAAGATAGATGAAGAGAACGAGGCAAACCTTGCTA  
GCTGTTCTACTGAAACACTGGACAGCATCCCTGTGGATGAGGATGGATTGCCCTTCATTT  
GATGCACTGACAGATGGAGATGTGACCAACGAAAATGCCGCTAGTCCCTCCCAATGCC  
GACGGCACCCCTCCAACCTCAGGAGGCAGAAGAGCCGTCTCTACTTAAGAAGCTCTTGCT  
GCTCCAGCCAACACTCAGCTAAATTACAATGAATGCAGTGGTCTCAGCACACAAAACCAT  
GCAAACACTAATCACAGGATCAGAACAAGCCCTGTGGTTGTTAAGACTGAGAATTCATGG  
AGCAATAAAGCGAAGAGCATTGTCAACAGCAAAGCCTCAAAGACGTCCCTGCTCTGAA  
CTTCTCAAATATCTGACTACGAATGATGATCCTCCTCAGACCAAACCAGCAGAGAACAGG  
AACAGCAGCAAAGAGAAATGCACCTCCAAAAGGAAGCCCCATTTGCAGTCTCAGACAAAT  
CATCTGCAGGCCAAACCAACAAGTTTATCACTTCCATTGACACCCGAGTCACCAATGAT  
CCCAAGGGTTCCCATTTGAGAACAAGACTATTGAACAAACCTTAAGTGTGGAACCTCT  
GGAACCTGCAGGCCTAACTCCACCTACGACCCCTCCTCATAAAGCCAACCAAGATAACCCT  
TTTAGGACTTCACCTAAATTGAAGTCATCATGCAAGACTGTTGTACCACCTTCAAAAAG  
CCCCGCTATTGTGAGTCTTCCAGTTCTCAAGGAAATAACCAATCAAGAAGGGTTCAGTA  
CCGTCTGAGCTGTACACACAGCTTAACAAGACTACAGTACTGTCCAGTGGACATGAGGAG  
AGAAAGACAAAACGGCCAGTTTGGCGCTGTTTGGTGACCATGACTACTGTCAATCTGTG  
AATTCGAAATCGGAAATACATATAAATATCCAGGAACTTCAGGACTCCAGACAACCA  
GAATTTAAGGATCTTACCTGGGTGGCAGTGTGAGATTTGTTCTTTAGAACAAAGAC  
CAGTATTTCAAGAAAGAGACTTTACAGACAAATAACCAGGGATCCCATGGTAATAACAGA  
AAACAGCTCCAAGACCAGGAAATTCGGGCTGAACTGAATAAGCATTGTTGGTACCCACAGC  
CAAGCTGTTTTTGTATGAAGAAGCAGATAAGACCAGAGAACTAAGGGACAGTGATTACAGT

AATGAACAATTCTCCAAACTACCTATGTTTATAAATTCAGGACTAGCAATGGATGGTCTG  
TTTGATGACAGTGAAGATGAAAGTGATAAACTATGCTACCCTTGGGATGGGACACAAGCC  
TATTCATTATTTGATGTATCACCTTCTTGCTCTTCTTTAACTCTCCATGCAGAGATTCA  
GTGTCTCCACCCAAATCCTTATTTTCTCAAAGATCCCAAAGGACACGCTCTAGATCAAGG  
TCCTTCTCAACGCAGGTCTTGTCCCGTTCTCCATATTCCTGATCGAGATCAAGGTCG  
CCCTGTAGTAGATCCTCTTCAAGATCTTGTGCTATTGTGAGTCCAGCCACTGTAGACAC  
CGAGCATAACAGAAGTTCTCCCTTAGGTGGAAGATCGCGGTCCAGATCACCGTACAGTCGC  
AGACCCAGATATGACAGCTATGAGGAATATCAGCATGAAAGGCTGAAGAGGGAAGAATAC  
CGCAAAGAGTATGAAAAACGGGAATCTGAAAGGGCCAAGCAAAGGGAGAGACAGAGGCAG  
AAAGCAATTGAAGAACGTCGTGTGATTTATCTGGGTAAAATCAGACCTGACACAACCCGA  
ACAGAAGTGAAGGACCGGTTTGAAGTTTTGGTGAATTGAGGAGTCACTGTAAATTTG  
CGGGATGATGGAGACAGCTATGGTTTCATCACCTACCGCTATACTTGTGACGCCTTCGCT  
GCTCTTAAAATGGATACACTTTACGCAGGTCAAATGAGCCTGATTTTGAGCTGTACTTC  
TGTGGACGCAAGCAGTTTTGCAAGTCTAACTATGCAGACCTAGATTCAAACCTCAGATGAT  
TTTGATCCTGCTTCCACTAAAAGCAAGTATGACTCCATGGATTTTGATAGTTTACTTAAA  
GAGGCACAGCGGAGCCTGCGTAGG

>African\_ostrich\_PPARGC1A

ATGGCGTGGGACATGTGCAACCAGGACTCTGTCTGGAGTGACATAGAGTGTGCTGCTCTG  
GTTGGTGAAGACCAGCCTCTTTGCCAGATCTCCAGAACTTGACCTCTCTGAACTAGAC  
GTGAACGACTTGGATGCAGACAGCTTCTAGGGGACTGAAGTGGTACAGCGACCAATCA  
GAAATTATTTCCAATCAGTACAGCAATGAATCCTCCAATATTTGAGAAGATAGATGAA  
GAGAATGAGGCAAACCTTGCTAGCAGTTCTCACAGAAACTGGACAGTATCCCTGTGGAT  
GAGGATGGATTGCCTTCAATTTGATGCGCTGACAGATGGAGATGTGACCAATGAAAATGAT  
GCTAGCCCTTCCCAATGCCGACGGCACCCCTCCAACCTCAGGAGGCAGAAGAGCCGTCT  
CTACTTAAGAAGCTCTTGCTGGCTCCAGCCAACACTCAGCTAAATTACAATGAATGCAGT  
GGTCTCAGCACACAAAACCATGCAAACACTAATCACAGGATCAGAACAAGCCCTGTGGTT  
GTTAAGACTGAGAATTCATGGAGCAATAAAGCGAAGAGCATTGTCAACAGCAAAGGCCA  
CAAAGACGTCCCTGCTCTGAACTTCTCAAATATCTGACTACAAATGATGACCCTCCTCAG  
ACCAAACCAGCAGAGAACAGGAACAGCAGCAAAGAGAAATGCACCTCCAAAAGGAAGCCC  
CATCTGCAGTCTCAGACAAATCATCTGCAAGCCAAACCAACAGTTTATCACTCCCGTTG  
ACCCCGAGTACCAAATGATCCCAAGGGTTCCCATTTGAGAACAAGACTATTGAACAA  
ACCTAAGTGTGGAACCTCTCTGGAACCTGACAGCCTAACTCCACCGACGACCCTCCTCAT  
AAAGCCAACCAGGATAATCCTTTTAGGACTTACCTAAGCCGAAGTCATCATGCAAGACT  
GTTGTACCACCTTCAAAAAAGCCCCGCTATAGTGAGTCTTCCAGTTCTCAAGGAAATAAC  
CCAACCAAGAAGGGTCCAGAACAATCTGAGCTGTATGCGCAGCTTAGCAAGACTACAGTA  
CTGTCCAGTGGACATGAGGAGAGAAAGACAAAACGGCCCAGTTTGCAGGCTGTTTGGTGAC  
CATGACTACTGTCAATCTGTGAATTCAAAATCGGAAATACACATAAAAAATATCCAGGAA  
CTTCAGGACTCCAGACAAGTAAATTAAGGATTCTTCACTGGGTGGCAATGTCAGATT  
TGTTCTCTTTAGAACAAGACCAGTATTTCAAGAAAGAGACTTTACAGACAAGTAAGCAG  
GGTTCCCACTGTAATAACAGAAAACAGCTCCAAGACCAGGAAATTCGGGCTGAACTGAAT  
AAGCATTTTGGTACCCAGCCAAGCTGTTTTTGTGATGAAGAGGCAGATAAGACCAGTGAG  
CTAAGGGACAATGATTATAGTAATGAACAATCTCCAACCTACCTATGTTTATAAATTCA  
GGACTAGCAATGGATGGTCTCTTTGATGATAGCGAAGACGAAAGTGATAAACTATGCTAC  
CCTTGGGATGGGACACAAGCCTATTCATTATTTGATGTATCGCCTTCTTGCTCTCTTTT

AACTCTCCATGCAGAGATTCAGTGTCTCCACCCAAATCCTTATTTTCTCAAAGATCCCAA  
AGGATACGCTCTAGATCAAGGTCTTTCTCAACGCAGGTCTTGTCCCGTTCTCCATAT  
TCCCGATCGAGATCAAGGTGCGCCTGTAGTAGATCCTCTTCAAGATCTTGTTACTATTAT  
GAGTCCAACCACTGTAGACAGCGAGCATAACAGAAAGTTCTCCCTTATATGCAAGATCGCGA  
TCCAGATCACCGTACAGTCGAAGACCCAGATATGACAGCTATGAGGAATATCAGCATGAA  
AGGCTGAAGAGGGAAGAATACCGCAAAGAGTATGAAAAACGGGAATCTGAAAGGGCCAAA  
CAAAGGGAGAGACAGAGGCAGAAAGCAATTGAAGAACGTCGTGTGATTTATGTGGGTAAA  
ATCAGACCTGACACAACCCGAACAGAAGTGAAGGGACCGGTTTGAAGTTTTTGGTGAAATT  
GAGGAGTGCACAGTAAATTTGCGGGATGATGGAGACAGCTATGGTTTCATCACCTACCGC  
TACACATGTGATGCCTTTGCTGCTCTTGAAGTGGATACACTTTGCGCAGGTCAAATGAA  
CCTGACTTTGAACTGTACTTTTGTGGACGCAAGCAATTTTACAAGTCTAACTATGCAGAC  
CTAGATTCAAACCTCAGATGATTTTGTATCCTGCTTCCACTAAAAGCAAGTATGACTCCATG  
GATTTTGATAGTTTACTTAAAGAGGCACAGCGGAGCCTGCGTAGG

>Adelie\_penguin\_PPARGC1A

ATGGCGTGGGACATGTGCAACCACGACTCTGTATGGAGTGATCTCGAGTGTGCTGCTCTG  
GTTGGCGAAGACCAGCCTCTTTGCCAGATCTCCAGAAGTGGACCTCTCCGAAGTAGAT  
GTGAACGACCTAGACGCAGACAGCTTTCTGGGGGACTGAAGTGGTACAGCGACCAGTCT  
GAGATCATCTCCAATCAGTACAGCAATGAACCCGCCAATATATTCGAGAAGATAGATGAA  
GAGAGCGAGGCAAACCTGCTAGCTGTTCTCACTGAAACACTGGACAGCATCCCTGTGGAT  
GAGGATGGGTTGCCTTCATTTGATGCACTGACAGATGGAGATGTGACCAACGAAAATGCC  
GCTAGCCCTTCCCAATGCCGACGGCACCCCTCCAACCTCAGGAGGCAGAAGAGCCGTCT  
CTACTTAAGAAGCTCTTGCTGGCTCCAGCCAACACTCAGCTAAATTACAATGAATGCAGT  
GGTCTCAGCACACAAAACCATGCAAACACTAATCACAGGATCAGAACAAGCCCTGTGGTT  
GTTAAGACTGAGAATTCATGGAGCAATAAAGCAAAGAGCATTGTCAACAGCAAAGCCT  
CAAAGACGTCCCTGCTCTGAACTTCTCAAATATCTGACTACGAATGATGACCCTCCGCAG  
ACCAAACCAAGTAGAGAACAGGAACAGCAGCAAAGAGAAAATGCACCTCCAAAAGGAAGCCC  
CATCTGCAGTCTCAGACAAATCATCTGCAAGCCAAACCAACAAGTTTATCACTTCCATTG  
ACGCCCGAGTACCAAATGATCCCAAGGTTCCCATTTGAGAACAAGAATATTGAACAA  
ACCTAAGTGTGGAACCTCTGGAACCTGAGGCTCACTCCACCTACGACCCCTCCTCAT  
AAAGCCAACCAAGGATAATCCTTTTAGGACTTACCTAAGCCGAAGTCATCATGCAAGACT  
GTTGTACCACCTTCAAAAAGCCCCGCTATAGTGAGTCTTCCGTTTCTCAAGGAAGTAAC  
CCAATCAAGAAGGGTCCAGAACAGTCTGAGCTGTACGCACAGCTTAGCAAGACTACAGTA  
CTGTCCAGTGGACATGAGGAGAGAAAAGACAAAACGGCCCAGTTTGCAGGCTGTTTGGTGAT  
CATGACTACTGTCAATCTGTGAATTCAAAATCGGAAATACACATTAATAATATCCAGGAA  
CTTCAGGACTCCAGACAAGTAAATTAAGGATTCTTACCTGGGTGGCAGTGTGAGATT  
TGTTCTTCTTTAGAACAAGACCAGTATTTCAAGAAAGAGACTTTACAGACAAGTAAGCAG  
GGATCCCACGGTAATAACAGAAAACAGTCCAAGACCAGGAAATTCGGGCTGAACTGAAT  
AAGCATTTTGGTCAACCCAGCCAAGCTGTTTTTGTGATGAAGAAGCAGATAAGACCAGAGAA  
CTAAGGGACAGTGATTACAGTAATGAACAATTCTCAAACCTACCTATGTTTATAAATCA  
GGACTAGCAATGGATGGTCTCTTTGATGACAGTGAAGATGAAAGTGATAAACTATGCTAC  
CCTTGGGATGGGACACAAGCCTATTCATTATTTGATGTATCGCCTTCTTGCTCTTCTTTT  
AACTCTCCATGCAGAGATTCAGTGTCTCCACCCAAATCCTTATCTTCTCAAAGATCCCAA  
AGGACACGCTCTAGATCAAGGTCTTTCTCAACGCAGGTCTTGTCCCGTTCTCCATAT  
TCCCGATCGAGATCAAGGTGCGCCTGTAGTAGATCCTCTTCAAGATCTTGTTGCTATTAC

GAGTCCAGCCACTGTAGACACCGAGCATAACAGAAGTTCTCCCTTAGGTGCAAGATCGCGA  
TCCAGATCACCGTACAGTCGCAGACCCAGATATGACAGCTATGAAGAATATCAGCATGAA  
AGGCTGAAGAGGGAAGAATACCGCAAAGAGTATGAAAAACGGGAATCTGAAAGGGCCAAA  
CAAAGGGAGAGACAAAGGCAGAAAGCAATTGAAGAACGTCGTGTGATTTATCTGGGTAAA  
ATCAGACCTGACACAACCCGAACAGAAGTCTGAGGGACCGGTTTGAAGTTTTTGGTGAAATT  
GAGGAGTGCACAGTAAATTTGCGGGATGATGGAGACAGCTATGGTTTCATCACCTACCGC  
TATACTTGTGACGCCTTTGCTGCTCTTGAAAATGGATGTACTTTACGCAGGTCAAATGAA  
CCTGACTTTGAGCTGTACTTCTGTGGATGCAAGCAATTTTGCAAGTCTAACTATGCAGAC  
CTAGATTCAAACCTCAGATGATTTTGATCCTGCTTCCACTAAAAGCAAGTATGACTCCATG  
GATTTTGATAGTTTACTTAAAGAGGCACAGCGGAGCCTGCGTAGG

>common\_starling\_PPARGC1A

ATGGCGTGGGACATGTGCAACCAGGACTCTGTATGGAGTGATCTCGAGTGTGCTGCTCTG  
GTTGGTGAAGACCAGCCTCTTTGCCCGGATCTCCAGAAGTCTGACCTCTCTGAACTAGAT  
GTAAACGACCTGGATGCAGACAGCTTTCTGGGGGGACTCAAGTGGTACAGCGACCAGTCT  
GAGATCATCTCCAACCAGTACAGCAATGAACCCGCCAATATATTCGAGAAGATAGATGAA  
GAGAGCGAGGCAAACCTTGCTAGCTGTTCTCACAGAAACTGGACAGCATCCCTGTGGAT  
GAGGATGGATTGCCTTCTTTGATGCACTGACAGATGGAGATGTGACCAACGAAAATGCC  
GCTAGCCCCTCCCAATGCCCGACGGCACCCCTCCCACTCAGGAGGCAGAAGAGCCGTCT  
CTACTTAAGAAGCTTTGCTGGCTCCAGCCAACACTCAGCTAAATTACAATGAATGCAGT  
GGTGTGAGCACACAAAACCATGCAAACACTAATCACAGGATCAGAACAAGCCCTGTGGTT  
GTTAAGACTGAGAATTCATGGAGCAATAAAGCGAAGAGCATTGTCAACAGCAAAGCCT  
CAAAGACGTCCCTGCTCTGAACTTCTCAAATATCTGACTACGAATGATGATCCTCCTCAG  
ACCAAACCAGCAGAGAACAGGAACAGCAGCAAAGAGAAATGCACCTCCAAAAGGAAGCCC  
CATCTGCATTCTCAGACAAATCATCTGCAGGCCAAACCAACAAGTTTATCACTTCCATTG  
ACACCCGAGTCACCAAATGATCCCAAGGTTCCCCATTTGAGAACAAGACTATTGAACAA  
ACCTTAAGTGTGGAACCTCTGGAAGTGCAGGCCTAACTCCACCTACGACCCCTCCTCAT  
AAAGCCAACCAAGATAATCCTTTTAGGACTTACCTAAACTGAAGTCATCATGCAAGACT  
GTTGTACCACCTTCAAAAAGCCCCGCTATAGTGAGTCTTCCGTTTCTCAAGGAAATAAC  
CCAATCAAGAAGGGTCCAGATCAGTCTGAGCTGTACACACAGCTTGGCAACACTACAGTA  
CTGTCCAGTGGACATGAGGAGAGAAAGACAAAACGGCCAGTTTTCGGCTGTTTGGTGAC  
CATGACTACTGTCAATCTGTGAATTCAAAATCGGAAATACACATTAATAATATCCAGGAA  
CTTCAGGACTCCAGACAACCAGAATTTAAGGATTCTTACCTGGGTGGCAGTGTGAGATT  
TGTTCTCTTTAGAACAAGACCAGTATTTCAAGAAAGAGACTTTACAGACAAATAAGCAG  
GGATCCCATGGTAATAACAGAAAACAGCTCCAAGACCAGGAAATTCGGGCTGAACTGAAT  
AAGCATTTTGGTCACCCAGCCAAGCTGTTTTTGTGATGAAGAAGCAGATAAGACCAGAGAA  
TTAAGGGACAGTGATTTAGTAATGAACAATTTCCAAAACCTATGTTTATAAATTCA  
GGACTAGCAATGGATGGTCTGTTTGTGATGACAGTGAAGATGAAAGTGATAAACTATGCTAC  
CCTGGGATGGGACACAAGCCTATTCAATTATTTGATGTATCACCTTCTTGCTCTTCTTTT  
AACTCTCCGTGCAGAGATTGAGTGTCTCCACCCAAATCCTTATTTTCTCAAAGATCCCAA  
AGGACACGCTCTAGATCAAGGTCCTTTCCTCAACGCAGGTCTTGTTCCTGTTCTCCATAT  
TCCCGATCGAGATCAAGGTCGCCCTGTAGTAGATCCTTCAAGATCTTGTGCTATTGT  
GAGTCCAGCCACTGTAGACACCGAGCAAACAGAAGTTCTCCCTAGGTGGAAGATCGCGG  
TCCAGATCACCGTACAGTCGCAGACCCAGATATGACAGCTATGAGGAATATCAGCATGAA  
AGGCTGAAGAGGGAAGAATACCGCAAAGAGTATGAAAAACGGGAATCTGAAAGGGCCAAAG



CAAAGGGAGAGACAGAGGCAGAAAGCAATTGAAGAACGCCGTGTGATTTATCTGGGTAAA  
ATCAGACCTGACACAACCCGAACAGAAGTGAAGGGACCGGTTTGAAGTTTTTGGTGAAT  
GAGGAGTGCACAGTAAATTTGCGGGATGATGGAGACAGCTATGGTTTCATCACCTACCGC  
TATACTTGTGACGCCTTCGCTGCTCTTGAAAATGGATACACTTTACGCAGGTCAAATGAA  
CCTGATTTGAGCTGTACTTCTGTGGACGCAAGCAGTTTTGCAAGTCTAACTATGCAGAC  
CTAGATTCAACTCAGATGATTTTGATCCTGCTTCCACTAAAAGCAAGTATGACTCCATG  
GATTTTGATAGTTTACTTAAAGAGGCACAGCGGAGCCTGCGTAGG

>central\_bearded\_dragon\_PPARGC1A

ATGGCTGGTTGCGGGCTCTCCGAAGATGCCGCCTTCTCCATCGCCACCGCCGCCACCTCC  
TCGTCCTGCTCCTCCTTCTGCAACCTCGCCGCTCCTGGGAAGCCCCTTTCAGCCATCAG  
CCTTTTTCCAGCGCTGATCTTCTGCAAAGGAATGCAACATTCTTTTCAGCAACACACAG  
TGCGCTGCTCTGGTTGGTGAAGACCAGCCTCTTGGCCAGATCTCCAGAACTTGACCTT  
TCTGAATTAGATGTGAATGATTTGGATGCAGACAGCTTCTGGGTGGACTCAAGTGGTAT  
AGCGACCAATCAGAAATAATTTCCAATCAGTATGCCAATGAATCGACAAACATATTCGAG  
AAGATAGATGAAGAGAATGAAGCAAACCTGCTAGCAGTTCTCACAGAGACGTTGGACAGC  
ATCCCTGTGGATGAAGATGGATTGCCTTCATTTGATGCATTGACAGATGGCGATGTGACC  
AACGAAAATGATGCTAGCTCTTGGCAATGCCTAATGGCACCCCTCCACCTCAGGAGGCA  
GAAGAGCCATCTACTTAAGAAGCTCTTGTGGCTCCAGCTAACACCCAGCTAAATTAC  
AATGAATGCAGTGGCCTCAGCACACACAATCATGCAAATGCCAGTCACAGGATCAGAACA  
AGCCCTGTGGTGGTTAAGACTGAGAATTCATGGAGCAATAAGGCAAAAAGCATTGTCAA  
CCACAAAAGCCACAAAGACGTCCCTGTTCAAGAACTTCTCAAATATCTGACTACAAGCAAT  
GACTCTCCTCAGACCAAACCAACAGAGAACAGAAACAGTAGCAGAGACAAATGCACTACT  
AAAAAGAAAACACTTTTGCACTCTCAGACACATCATTGCAAGCCAAACCAATGAGTTTA  
TCGCTTCTTTGACGCTGAGTCACCAAATGATCCCAAGGGTCCCATTTGAGAACAAG  
ACTATTGAACAAACTTTAAGTGTGGAACCTCTGGAACCTGCAGGCCTAACTCCGCCTACA  
ACCCCTCCTCACAAAGCCAATCAAGACAACCCCTTTTAGGACATCACCAAAGCCAAAGTCA  
TCATGCAAGACTGTTATGCCACCTTCCAAAACCCCTGCTGCAGTGAGTCTTCCAGCTCT  
CAAGGACATATTTTCGTTGGAAGGGTCCAGAGCAGTCAGAAGTGTATGCACAGCTTTGC  
GAGACAACCTGTGCTGTCTGTGTCAGTCACGAGGAGAGGAAGACAAAGCGGCCTGGTTTACAG  
CTGTTTGGTGTATGACTACTGTGCTGCTAATTCAAAAACAGAAATACACATTAAT  
CTGTCCCAGGAACCTCAGGATTCCAGACAAGTAGAGCTGAAAGGCTGCTTGCCTGGGCGA  
TGGTGTCAAATTTGTTCTTTTGA AAAACATGACCAGTATGCCAAGAGAGAGACTTCA  
CAGGCAAGCAAGCAGAATTTGAGTGAACAACCGGAAACCGCTCCAAGACCAAGAAATC  
CGGGCTGAACTGAATAAGCACTTTGGTACCTTAGTCAAGCTTTTTTTGAGGAAGAGACC  
ACTAAGACCAGTGAACCTGAGGAACAGCAGTAATTATAGTGGTGAACAATTCTCCAAGCTA  
CCTATTTTATAAATCTGGACTAGCAATGGATGGTCTTTTTTATGACAGTGAAGATGAA  
AATGACAAATTGTGCTGCTCATGGCATGGGACACAAGCCTACTCATTGTTTGACCTGTG  
CCTTCTGCTCATCCCTAATTCTCCATGCAGAGATTAGTGTCTCCACCCAAATCCTTG  
CTTTCAAGATCCAAAGGATACGTTCTCGATCAAAGTCCTTTCTCAGCGCAGGTCTTGT  
CCCCGTTCTCATATCCCAATCACGGTCAAGGTACCCGTGGAGTAGATCCTCTTCCAGA  
TCATCTTACTGTTATGAGTCCAGTCAATTGTAGATCCTGGGAATATAGAAGTTCTCCCTTA  
TATTCAAGATCACGATCCAGATCACACATAGTCATAGAGCCAGATATGACAGCTACGAG  
GAATATCAGCATGAAAGACTGAAGAGGGGAAGAATACCGCAAAGAATATGAAAAACGGGAA  
TCTGAAAGGGCCAAACAAAGAGAGAGACAGAGGCAGAAGGCAATTGAAGAACAACGTGTA

ATTTATATTGGTAAAATTGGCCCTGACACAAGCCGAACAGAACTGAGGGACCGGTTTGAA  
ATATTTGGTGAAATTGAGGAGTGCACAGTAAATCTACAAGATAATGGAGATAGCTATGGT  
TTCATCACTTACCGCTACACTTGTGATGCTTTTGCTGCTCTAGAAAATGGATACACTCTA  
CGCAGGTCCAATGAGCCTGACTTTGAGCTGTATTTTTGTGGACAAAAGCAGTTTTACAAG  
TCCAACATGCAGACTTAGATTCAAATTCAGACGATTTTGATCCTACTTCTACTAAGAGC  
AAGTATGACTCCATGGATTTTGACAGTTTACTTAAAGAGGGCGAACGCAGCTTGCGGAGG  
>Gecko\_PPARGC1A  
ATGGCGTGGGACATGTGCAGCCCCGACGCCGCTGGACTGACATCGAGTGTGCTGCTCTG  
GTTGGTGAAGACCAGCCCCTTGCCCGATCTTCCCGAACTCGACCTCTCTGAACTAGAC  
GTGAATGACTTGGATGCGGACAGCTTCTGGGCGGACTCAAGTGGTACAGCGACCAACCA  
GAGATCATTTCCAATCAGTACAACAATGAGTCATCAAATATCTTTGAGAAGATCGATGAA  
GAAAACGAAGCCAACTTGCTAGCAGTCCTCACAGAGACGCTGGACAATATCCCGGTGGAC  
GAGGATGGATTACCTTCATTCGACGCCCTGGCAGATGGTGTGTGACCAATGAAAACGAT  
GCTAGTTCTTACCAATGCCCGACAGCGCTCCTCCATCTCAGGAGGCAGAAGAGCCGTCT  
CTACTTAAGAAGCTCTTGTGGCTCCAGCTAACACCCAGCTAAATTACGATGAATGCAGT  
GGCCTCAGCACACACAATCATGCCAGCACCAATCACAGGATCAGAGCAAGCCCTATGGCC  
ATTAAGACTGAGAATTCATGGAGCAATAAAGCGAAGAGCGTTTGTCAACCGCCAAAGCCA  
CAGAGACGCCCTTGCTCGGAGCTCCTCAAGTATCTGACTACAAACGATGACCCTCCACAG  
ACCAAACCAACAGAGAACAAGAACAGCAACAGAGACAAGTGCACCTCGAAAAAGAAGGCC  
CTTTTGCAGTCTCAGACACATCACTTGCAAGCCAAACAAATGAGTTTATCGCTTCTTTG  
ACGCCCGAGTACCAATGATCCCAAGGGTTCCTTCCATTTGAGAACAAGACTATTGAACAA  
ACTTTAAGTGTGAACTCTCTGAACTGCAGGCCTAACTCCACCTACAACCCCTCCTCAC  
AAAGCCAACCAAGACAACCCCTTTAGGACTTCGCCAAAGCCGAAGTCATCATGCAAGACT  
GTCGTGCCATCTTCAAAAAACCCGCTGTAGTGAGTCTTCCAGCTCTCAAGGACCTAAC  
TCGCTTCGGAAGGGTCCAGCACAGTCAGAGCTGTATGCGCAGCTTAGCAAGACAACCGTT  
CTGTCTGCCGGCCACGAGGAGAGGAAGACAAAGCGGCCTGGTTTTCGGCTGTTTGGCGAC  
CATGACTACTGTGAGTCTGTTAACTCAAAGCAGACGTGCGTATCAACCTACCCAGGAA  
CTCCAGTATTCTGGACAAGTAGAATCACAAGGCTGCTTGCCCTGGGTGGCAGTGTATATT  
TGTTCTCCCTTTGACCCACTCAGCCAGTATGGCAAGAGAGAGACTTCACAGGTGAGCAAG  
CAGGATCCGCAGCACACAACCGGAAACAGCTCCAAGACCAGGAAATCCGGGCCGAACTC  
AATAAGCACTTTGGTCAACCCGAGCCAAGCGTTTTTTGAGGAAGAGACCACTAAGAGCAGT  
GGGCTGAGGGACAGCCATTATAGCGACGAACAATTCTCCAGACTACCTATGTTTATAAAT  
TCAGGGCTGGTAATGGATGGCCTTTTGGATGACAGTGAAGACGAATGTGACAAACTGTGC  
TGCTCGTGGGATGGAACGCAAACCTACTCCTTGTGTTGATCTGTGCGCTTCTTGCTCTTCC  
CTTAACTCTCCGTGCAGAGATTTGGTATCTCCACCCAAATCCTTCTTTCTCAAAGATTC  
CAAAGGATACGATCTCGATCAAGGTCCTTCTCAGCACAGGTCTTGTCCCGTTCTCCA  
TATCCCGATCGAGATCAAGGTCACCGTGCAGTAGATCCTTCAAGATCTTCTATTAT  
CAAGAGTCTGGTCACTGTAGACCCGGGCATATAGAAGTTCTCCCTGTATTCAAGATCA  
CGTTCCAGATCACCATATAGCCGTAGACCCAGGTATGACAGCTACGAGGAATATCAGCAT  
GAAAGGCTGAAGAGGGAAGAATACCGCAAAGAGTATGAAAAACGGGAATCCGAAAGGGCC  
AAACAAAGGGAGAGGCAGAGGCAGAAGGCAATTGAAGAGCGGCGCGTAATTTATGTCGGA  
AGAATTGGACCTGACATCACCCGAGCAGAACTGAGCGACCGTTTTGAAGTTTTTCGGCGAA  
ATTGAGGAGTGCACAGTAAATCTACAGGATGATGGGGATAGCTACGGTTTCATCACTTAC  
CGCTACACCTGCGATGCTTTTGTGCTCTGGAAAATGGATACACCTTGCAGGTCAGT

GAGCCTGACTTAGAGTTGTATTTTTGCGGACACAAGCAGTTTTGCAAGTCTAACTATGCA  
GACCTAGATTCAAACCTCGGATGATTTTTGATCCTGCTTCTACCAAGAGCAAGTATGATTCG  
ATGGATTTTGACAGCTTGCTTAAAGAGGCTCAGCGAAGCTTGCGAAGG

>Taiwan\_habu\_PPARGC1A

TGTGCTGCTTTAGTTGGGGAAGACCAGCCTCTCTGCCAGACCTCCGGAACCTTGATCTC  
TCCGAATTAGATGTCAACGATCTGGATGACAGCGGTTTCCTGGGAGGGCTTAAGTGGTAC  
AACGACCAATCGGAAATCATCTCCATCCGTATCCTAACGAGACATCCAACATATTTGAG  
AAGATAGATGAAGAGAACGAAGCAAACCTTGCTAGCGGTCCTCACCGAAACGTTGGACAGT  
ATCCCAGTGGACGAAGATGGATTGCCTTCCTTCGACGCCCTGACAGATGGAGATGTGACC  
AGCCAAAATGAGGCCAGCCCTTCATCAGTGGCTGACAGCACCCCCCACCTCAGGAGGCC  
GAAGAGACGTCTACTTAAGAAGCTTTGCTGGCTCCAGCCAACATCCAGCTAAACTAC  
AATGAATGCAGTGGCCTGGGCACGCACAATCATGCAAACCTCCAATCACAGGATCAAAACA  
AGCCCTGTGGTGGTCAAGACCGAGAATCCATGGAGCAATAAAGTGAAGAGCATCTGCCAG  
GCGCAAAGCCGACAGAGACGCCCTGCTCAGAACTTCTCAAGTACCTGACCACCGGTGAT  
GACCCCGGTGAGGCCAAACAGACGGAAAACAGGAACAGCAACAGGGACAAATACACTTCT  
AAAAAGAAGGCACTGTTGACTCTCAGACGCACCACTTGAAGAGAACGAATGTTATGGG  
GCACCTGCTAAGCAGACCAAATCAATGAATTTATCGCTTCCGTTGACGCCTGAATCGCCA  
AACGATCCGAAGGGTTCCCCATTTGAGAGCAAGGCCATCGGACAAAGCTTAAGTGTGGAA  
CTCTGTGGAACCTGCAGGCCTAACTCCACCTACCACCCCTCCTCATAAGAGCAGCCAAGAC  
AATCCTTTTGGGACTTTGCCAAAGCCACGGTGTGATGCCCGACTGTTATGCCACCTTCC  
CCGACACCTCGCTGCAGTACTTCCATCTCTCAAGGACGCAATTTGTTCTGGAAGGGT  
CCGGAGCAGTCGGAGCTATATGCCAGCTGAGCAAGACCACCGTGTGCCCCGTGGGCCGT  
GAGGAGAGGAAGGCGAGGCGGGCTGGCTTGACTGTTCCGGCAGCAGGATTACTGTGAG  
TCGGCCATTTCTAAGACAGAACGATGCGTCAACCGCTCCCTGGAACCTCAGAATCCCCGT  
CAGGAATTTGAATTCTCAGGCTGCCTATCCGGCTATGAGTGGTGCCACATTTGTTCTCTCC  
TTTGAGCAGAACCGCCAGGAGGATGAGCGAGAAGCTTCGAGGCGAGGAAGCAGGACTTA  
GCGTGCAACAGCCGAAACAGCTGCAAGACCAGGAAATCCGAGCTGAACTCAACAAGCAT  
TTTGGTTACCCTAGCCAAGCGGTTCTCGAGGAAGAGATGAATAACACCGGCCATCTGAGG  
GAGTACAGTCACTACAGCGATGAACAGTTCTCTAAGCTATCCATGTTTATCAATTCGGGA  
CTAGCGATGGAGGGCTTTTGGGACGACGGCGAAGCGGAAAACGAAAAGCTGTGCTGCTCG  
TGGTACGGGACGCAAGGCTGCACCTATTTGATACGTCACCTTCTTCTCATCCCTGAAT  
TCTCCATGCAGAGACTCGGTGTCTCCACCCAACCTCATTGCTCAACGGTTCCAGAGGCTA  
TGCGCTCAGTCGAGGTCTTCCACAGTGCAGGCATTGCGCCACTCTCCGTATTCCCGT  
TCAAGATCACGGTCGCCCCGCAAACGCTGCTCGTGCAGATATGACAGCTACGAGGAATAT  
CAGCACGAGAGGCTGAAGAGGGAAGAATATCGCAAAGAATACGAGAAACGGGAATCCGAA  
AGGGCGAAGCAGAGAGAAAGAGAGAGGCGAGAAAGCAGTGAAGAACGTCGCGTCATTTAT  
ATTGGTAGAATTGGACCTGGCTTTACCCAAAGGCAACTGAGGGACCGGTTTGAAGTTTTT  
GGTGAATTGAGGAGGTACAGTGAATCTACAGGATGATGGAGATAGCTATGGATTCATC  
ACTTACCGCTATACTTGTGATGCCTTTGCTGCACTAGAAAATGGAAACTCTACGCAGA  
TCCAATGAACCTGCCTTTTCAGCTGTATTTTTGTGGACAGAGGCAACGCTGCAAGGCTAAC  
TATGCAGATCTTGATCACATTCGGACGACTTTGATCCTGCTTCTACTAAGAGCAAGTAC  
GACTCCATGGATTTGATAGTTTACTTCGAGAGGCGCAAGGCAGCTTCCGAAGG

>green\_sea\_turtle\_PPARGC1A

ATGGCGTGGGACATGTGCAACCAGGACTCTGTATGGAGTGATATAGAGTGTGCTGCTCTT

GCTGGTGAAGCCCAGCCTCTTTGCCAGATCTCCAGAACTTGACCTCTCTGAACTAGAT  
GTGAATGACTTGGATGCAGACGGTTTTCTGGGTGGACTCAAGTGGTACAGCGACCAATCA  
GAAATCATTACCAATCAGTACAGCAATGAATCATCAAATATATTCGAGAAGATAGATGAA  
GAGAATGAAGCAAACCTTGCTAGCAGTTCTCACTGAGACTGGACAGTATCCCTGTGGAT  
GAGGATGGATTGCCTTCATTTGATGCACTGACAGATGGAGATGTGACGAACGAAAATGAT  
GCTAGCCCTTACCAATGCCAGACGGCACCCCTCCGACTCAGGAGGCAGAAGAGCCGTCT  
CTACTTAAGAAGCTTTGCTGGCTCCAGCCAACATTCAGCTAAATTACAATGAATGCAGT  
GGTCTCAGCACACAAAACCATGCAAACACTAATCACAGGATCAGAACAAGCCCTGTGGTT  
GTTAAGACCGAGAATTCATGGAGCAATAAACCGAAGAGCATTTGTCAACAGCAAAGCCA  
CAAAGACGTCCCTGCTCTGAGCTTCTCAAGTATCTGACTACAAATGATGACCCTCCTCAG  
ACCAAGCCAACAGAGAACAGAAAACAGCAGCAAAGACAAATGCATCTCCAAAAGAAGCCC  
CATCTTCAGTCTCAGGCACATCATTGCAAGCCAAACCAACAAGTTTATCACTTCCTTTG  
ACACCTGAGTCACCAATGATCCCAAGGGTTCCCATTTGAGAACAAGACTATTGAACAA  
ACCTTAAGTGTGGAACCTCTGGAACCTGAGGCTAACTCCACCTACGACCCCTCCTCAC  
AAAGCCAACCAAGATAATCCTTTGAGGACTTACCCAAGCTGAAGTCATCATGCAAGACT  
ATTGTACCACCTCAAAAAGCCCCGCTACAGTGAGTCTTCCAGTTCTCAAGGACATAAC  
ACAATCAAGAAGAGTCCAGAACAGTCTGAGCTGTATGCACAGCTTAGCAAGACAACGATA  
CTGTCCAGTGGACATGAGGAGAGAAAGACAAAACGGCCTAGTTTGC GGCTGTTTGGTGAC  
CATGACTACTGTCAATCTGTGAATTCAAAACCGAAATACACATTAATAATATCCAGGAA  
CTTCAGGACTCCAGACAACAAGAATTTAAAGATTCTGTACCTGGGTGGCAGTGTGAGATT  
TGTTCTTCTTTAGAACAAGACCAGTACTACAAGAGAGAGACTTTACAGGCAAGTAAGCAG  
GGTTCCCACTCTAGCAGCCGAAAACAGCTCCAAGACCAGGATATCCGGGCTGAACTGAAT  
AAGCACTTTGGTCACCCAGCCAAGCTGTTTTGATGAAGAGGCAGATAAGGCCAGTGAA  
CTGAGGGAAAGTGATTATAGTAATGAACAATTCTCCAACTACCTATGTTTATAACTTCA  
GGACTAGCTATGGATGGCCTCTTTGATGACAGTGAAGATGAAAGTGATAAACTATGCTAC  
CCTTGGGATGCGACAGAAGCCTATTGTTGTTGATGTATCGCCTTCTTGCTCTCTTTT  
AACTCCCAAGCAGAGATTGAGTGTCTCCACCCAAATCCTATTTTCTCAAAGATCCCAA  
AGGATACGCTCTAGATCAAGGTCCTTTCTCAACACAGGTCTTGTTCGGTCTCCATAT  
TCCCGATCGAGATCAAGGTCGCCATGTAGCAGATCCTTCCAGATCGTGTACTATTAT  
GAGTCCAGCCACTGTAGACATCGAGCATAACAAGTTCTCCTTTATATGCAAGATCACGA  
TCCAGATCACCATATAGTTGTAGACCAAGATATGACAGCTATGAGGAATACCAGCATGAA  
AGACTGAAGAGGGAAGAATACCGCAAAGAGTATGAAAACGGGAATCTGAAAGGGCCAAA  
CAAAGGGAGAGGCAGAGACAGAAAGCAATTGAAGAACGTCGTGTGATGTATGTGGGTAA  
ATCAGAGCTGATACGACCCGAACAGAATTGAGGGACCGGTTTGAAGTTTTTGGTGAAATT  
GAGGAGTGTACAGTACATCTGCGGGATGATGGAGACAGCTATGGTTTCATCACCTACCGC  
TACACTTGTGATGCGTTTGTCTCTCGAAAATGGATACACTTTGCGGAGGTCAAATGAA  
CCTGACTTTGAGTTGACTTTTGTGGACGCAAGCAATTTGCAAGTCTAACTATGCAGAC  
CTAGACTCAAACCTCAGATGATTTTGTCTCTCCACTAAGAGCAAATATGACTCCATG  
GATTTTGTAGTTTACTTAAAGAGGCACAGCGAAGCCTACGTAGG

>Chinese\_alligator\_PPARGC1A

ATGGCGTGGGACATGTGCAACCAGGACTCTGTATGGAGTGATATAGAGTGTGCTGCTCTG  
GTTGGTGAAGACCAGCCTCTTTGCCAGATCTCCAGAACTTGACCTCTCCGAACCTAGAT  
GTGAATGATTTGGATGCAGACAGCTTTCTGGGTGGACTCAAGTGGTACAGCGACCAATCA  
GAAGTTATTTCCAATCAGTACAACAATGAATCATCAAATATATTTGAGAAGATAGATGAA

GAGAATGAGGCAAACCTTGCTGGCAGTTCTCACAGAGACTGGACAGTATCCCTGTGGAT  
GAGGATGGATTGCCTTCATTTGATGCACTGACAGATGGAGAAGTGACCAATGAAAATGAT  
ACTAGCCCTTACCAATGCCTGACGGCACCCCTCCAGCTCAGGAGGCAGAAGAGCCGTCT  
CTACTTAAGAAGCTCTTGCTGGCTCCAGCCAACACTCAGCTAAATTACAATGAATGCAGT  
CGCCTCAGCACACAAAACCATGCAAACACTAATCACAGGATCAGAACAAGCCCTGTGGTT  
GTTAAGACCGAGAATTCATGGAGCAATAAATCAAAGAGCATTTGTCAACAGCAGAAGCCA  
CAAAGACGTCCCTGCTCTGAGCTTCTCAAGTATCTGACTACAAATGATGACCCTCCTCAG  
ACCAAACCTGACAGAGAACAGGAACAGCAGCAAAGACAAATGCAACTCCAAAAAGAAGCCC  
CAACTGCACTCTCAGGCACATCATTGCAAGCCAAACCAACAAGTTTATCACTTCCTTTG  
ACACCTGAGTACCAAATGATCCCAAGGGTTCCCATTTGAGAACAAGACTATTGAACAA  
ACCTTAAGTGTGGAACCTCTGGAACCTGAGGCTAACTCCACCTACGACCCCTCCTCAC  
AAAGCCAACCAAGATAATCCTTTTAGGACTTACCTAAGCCGAAGTCATCATGCAAGACT  
ATTGTACCACCTCCAAAAAGCCTCGCTATAGTGAGTCTTCCAGTTCTCAAGGAAATAAC  
CCAATCAAGAAGGGTGCAGAACAGTCTGAGCTGTATGCACAGCTCAGCAAGACAACAGTA  
CTGTCCAGTGGACATGAGGAGAGAAAGACAAAACGGCCTAGTTTGC GGCTGTTTGGTGAC  
CACGACTATTGTGAGTCTGTGAATTCAAAATCAGAAATACATATTAATAATATCCAGGAA  
CTTCAGGAGTCCAGACAAC TAGAATTTAAGGATTCTTACCTGCATGGCAGTGTGAGATT  
TGTTCTCTTTAGAACAAGACCAGTATTACAAGAAAGAGACTTTACAGACAAATAAGCAG  
GGTTCCCACTGCAATAATAGAAAGCAGCTCCAAGACCAGGAAATCCGGGCTGAACTGAAT  
AAGCACTTTGGTCACCCAGCCAAGCTGTTTTTGAAGAAGAGGCAGATAAGACCAGTGAA  
CTGAGGGACAGTGATTATAGTAATGAACAGTTCTCCAACTACCTATGTTTATAAATCA  
GGACTAGCAATGGATGGTCTCTTTGATGATAGTGAAGATGAAAGTGATAAACTATGCTAC  
CCTTGGGATGGGACACAAGCCTATTCTTTGTTTGTATGATCGCCTTCTTGCTCTCTTTT  
AACTCTCCATGCAGAGATTCAGTGTCTCCATCCAAATCTTTATTTTCTCAAAGATCCCAA  
AGGATACGCTCTAGATCAAGGTCCTTTCCTCAACGCAGGTCTTGTTCCTGTTCTCCATAT  
TCCCGATCGAGATCAAGATCGCCATGTAGCAGATCCTCTTCAAGATCTTGTTACTATTAT  
GAGTCCAGCCACTGTAGACACCGAGCATACAAAAGTTCTCCCTTACATGCAAGGTCACGA  
TCCAGATCACCCGTAATCGTAGACCCAGATATGACAGCTATGAGGAATATCAGCATGAA  
AGGCTGAAGAGGGAAGAATACCGCAAAGAGTATGAAAAACGGGAATCGGAAAAGGGCCAAA  
CAAAGGGAGAGGCAGAGGCAGAAAGCTATTGAAGAACGTCGTGTGATATATGTGGGTA  
ATCAGACCTGACACAACCTGAAACAGAACTGAGGGACCGCTTTGAAGTTTTTGGTGAAATT  
GAGGAGTGCACAGTAAATCTACGGGATGATGGAGACAGCTATGGTTTCATCACCTACCGC  
TATACTTGATGCTTTTGTGCTCTTGAATGGATACACTTTACGCAGGTCAAATGAA  
CCTGACTTTGAGCTGTACTTTTGTGGACGCAAGCAATTTGCAAGTGAACCTATGCAGAC  
CTAGATTCAAACTCAGATGATTTTGTCTGCTTCCACTAAAAGCAAGTATGACTCCATG  
GATTTTGATAGTTTACTGAAGGAGGCACAGCGAAGCCTGCGTAGG

>Gharial\_PPARGC1A

ATGGCGTGGGACATGTGCAACCAGGACTCTGTATGGAGTGATATAGAGTGTGCTGCTCTG  
GTTGGTGAAGACCAGCCTCTTTGCCAGATCTCCAGAACTTGACCTCTCCGAACTAGAT  
GTGAATGATTTGGATGCAGACAGCTTTCTGGGTGGACTCAAGTGGTACAGCGACCAATCA  
GAAGTTATTTCCAATCAGTACAACAATGAATCATCAAATATATTTGAGAAGATAGATGAA  
GAGAATGAGGCAAACCTTGCTGGCAGTTCTCACAGAGACGCTGGACAGTATCCCTGTGGAT  
GAGGATGGATTGCCTTCATTTGATGCACTGACAGATGGAGAAGTGACCAATGAAAATGAT  
ACTAGCCCTTACCAATCCCTGACGGCACCCCTCCAGCTCAGGAGGCAGAAGAGCCGTCT

CTACTTAAGAAGCTCTTGCTGGCTCCAGCCAACACTCAGCTAAATTACAATGAATGCAGT  
GGTCTCAGCACACAAAACCATGCAAACACTAATCACAGGATCAGAACAAGCCCTGTGGTT  
GTTAAGACCGAGAATTCATGGAGCAATAAAGCAAAGAGCATTGTCAACAGCAGAAGCCA  
CAAAGACGTCCCTGCTCTGAGCTTCTCAAGTATCTGACTACAAATGATGACCCTCCTCAG  
ACCAAACCAACGGAGAACAGGAACAGCAGCAAAGACAAATGCAACTCCAAAAAGAGGCC  
CAACTGCACTCTCAGGCACATCATTTGCAAGCCAAACCAACAAGTTTATCACTTCCTTTG  
ACACCTGAGTCACCAAATGATCCCAAGGGTTCCTCATTTGAGAACAAGACTATTGAACAA  
ACCTTAAGTGTGGAACCTCTCTGGAACCTGAGGCTAACTCCACCTACAACCCCTCCTCAC  
AAAGCCAACCAAGATAATCCTTTTAGGACTTCACCTAAGCTGAAGTCATCATGCAAGACT  
GTTGTACCACCTCCAAAAAGCCTCGCTATAGTGAGTCTTCCAGTTCTCAAGGAAATAAC  
CCAATCAAGAAGGGTCCAGAACAGTCTGAACTGTATGCACAGCTCAGCAAGACAACAGTA  
CTGTCCAGTGGACATGAGGAGAGAAAGACAAAACGGCCTAGTTTGC GGCTGTTTGGTGAC  
CACGACTATTGTCAGTCTGTGAATTCAAAATCAGAAATACATATTAATATCCCAGGAA  
CTTCAGGAGTCCAGACAACCTAGAATTTAAGGATTCTTACCTGCATGGCAGTGTGAGATT  
TGTTCTTCTTTAGAACAAGACCAGTATTACAAGAAAGAGACTTTACAGACAAATAAGCAG  
GGTTCCCACTGCAATAATAGAAAGCAGCTCCAAGACCAGGAAATCCGGGCTGAACTGAAT  
AAGCACTTTGGTCACCCTAGCCAAGCTGTTTTTGAAGAAGAGGCAGATAAGACCAGTGAA  
CTGAGGGACAGTGATTATAGTAATGAACAGTTCTCCAACTACCTATGTTTATAAATCA  
GGACTAGCAATGGACGGTCTCTTTGATGATAGTGAAGATGAAAGTGATAAACTATGCTAC  
CCTTGGGATGGGACACAAGCCTATTCTTTGTTGATGATCGCCTTCTTGCTCTTCTTTT  
AACTCTCCATGCAGAGATTGAGTGTCTCCATCCAAATCTTTATTTTCTCAAAGATCCCAA  
AGGATACGCTCTAGATCAAGGTCTTTCTCAACGCAGGTCTTGTTCCTGTTCTCCATAT  
TCCCGATCGAGATCAAGATCGCCATGTAGCAGATCCTCTTCAAGATCTTGTTACTATTAT  
GAGTCCAGCCACTGTAGACACCGAGCATACAAAAAGTTCTCCCTTGCATGCAAGGTCACGA  
TCCAGATCACCCGGTTATCGTAGACCCAGATATGACAGCTATGAGGAATATCAGCATGAA  
AGGCTGAAGAGGGAGAATACCGCAAAGAGTATGAAAAACGGGAATCGGAAAGGGCCAAA  
CAAAGGGAGAGGCAGAGGCAGAAAGCTATTGAAGAACGTCGTGTGATTTATGTGGGTAAA  
ATCAGACCTGACACAACCTGAAACAGAACTGAGGGACCGCTTGAAGTTTTTGGTGAAATT  
GAGGAGTGCACAGTAAATCTACGGGATGATGGAGACAGCTATGGTTTCATCACCTATCGC  
TATACTTGATGCTTTTGCTGCTCTTGAATGGATACACTTTACGCAGGTCAAATGAA  
CCTGACTTTGAGCTGACTTTTGTGGACGCAAGCAATTTGCAAGTCTAACTATGCAGAC  
CTAGATTCAAACCTCAGATGATTTGATCCTGCTTCCACTAAAAGCAAGTATGACTCCATG  
GATTTTGATAGTTTACTGAAGGAGGCACAGCGAAGCCTGCGTAGG

>African\_clawed\_frog\_PPARGC1A

TATGGAGTGACATAGAGTGTGCTGCTGGTGGTGAAGACCAGCCTCTGTGCCCGATC  
TTCCTGAACTTGGTCTCTCTGAACTTGATGTTAATGACTTAGATGCCGACAGCTTCTTGG  
GTGGATTAAGTGGTACAGTGACCAATCAGAAAACATTTCCAATCAATACAGCAGCGAAT  
CATCCAACATATTTGAGAAGATAGACGAGGAGAATGAAGAGAATTTGCTAGCAGTTCTTA  
CAGAGACATTGGACAGTCTCCCTGTGGATGAGGATGGATTGCCTTCATTTGATGCACTGA  
CAGATGGAGATGTGACCAATGAACATGAGCCTAGCCTTTACCTATGCCTGACGGCACCC  
CTCCAATTCAGGAGGCAGAAGAGCCGTCACTACTTAAGAAGCTGTTACTGGCTCCAGCTA  
ACGCTCAGCTGATTTACAATGAGTGC GTTGGTTTCACTACGCAGAACCATGGCAGCTCCA  
GTCAGAGGATCAGAACCAATTCTCGGTTATTAAGACCGAGAATCCATGGAGCAGTAAAC  
CGAGGGCCATTTGCTACTCCAAAAAGCCACCACGGCGTCTTGCTCAGAGCTCCTTAAGT

ACCTGACTTCAAATGACGACCCTCCTCAGACCAAATCGACAGAGAGCAGAAACAACAGGC  
TTGACAAATGCAGCAGCAAAAAGAAGCCGTACTTACAGCCCCAGCAACATTATCAAGCCA  
GGTCAATGAATTTGTCGCTCCCCTTGACGCCGAGTCACCAAATGACCCCAAGAGTTCCC  
CATTTGAGAGCAAGACTATTGAACGAGGCTTATGTATGGAGCTCTCTGGAAGTGCAGGAT  
TAACTCCACCTACAACACCTCCTCACAAAGCCAACCAAGAGAACCCCTTCAGGACCTCTC  
CTAAGTTGAAATCTTGCAAATCTTCTGTGCCACCTGCTAAAAAATCACGCTACATTGGGT  
CTTCCAGTATCCAAGTTCTATATCCAGCTAAGAAAGGTCCAGAGCAATCAGAACTTTATG  
CACAGCTCAGTAAAGCGACTGTGGTAATTGGACAAGAGGAGAAAAAATCAAAGCGACCTA  
GTTTACGACTTTTTGGAGACCAGACTACTGTCAGTTTATGACTTCAAATCTGAAAGAC  
ATATTAGTTTATCACAACAATTACAGGCCTCAAGACATCTTGAATGTAAGGATCCTTTGC  
CTGGCAAGGAACTGCAAGTCTGTTCAAACACTGACCAAGAGCAATGCCAGAAAGACAGCT  
TACCAGTACAATGCCAAGTTCTCAGAACAGCCATAGGAAACCGCTCCAGGACCAGGAAA  
TACGAGCCGAACTCAACAAGCACTTTGGGCACCCAACGCAGGCAGTCTACAACAATGAAA  
CTAAAATAAGTGAAGTGGTGGACAGTAAATACAGTGATGAACAGTTGTCAAGACTACCTT  
TGTTTTCTAACTGCCGGTTGGGAATAGATAGTTTGTGTTGATGACAGCGAGGATGAAAATG  
ATAAAGTGTCTATACTGGGATGAAACACAGTCATATTCATTATTTGATGAATCACCGT  
CTCGCTCTACTTTTAATCTCCAAGTAGATATTCAGTATCCCCACCAGCATCCCTGTTTT  
CACAAAGGATATGCTCTAGATCAAGATCTAGGTCTTTTACAGTTCAGATCATCTTCTC  
GTTCCCATATTCTCGTTCAAGATCCAGATCTCCATCAAGCAGATCATCATCAGGGTCTT  
GCTGCTACTCTGAGACTGATCATTGCAGAGAAAAAAGTTCTCCAATGTATGCACGGTCAA  
GGTCAACCGCTGGTCTGAGGCCAGATATGACAGCTATGAGGAATACCAACATGAACGGC  
TGAAGAGGGAGGAGTACCGCAAGGAGTATAAAAAGCGTGAATCCGAGAGAGCAAAACAAA  
GAGAGAGACAAAGGCAAAAAGCCATTGAAGAACATAGAGTGATTTTCTGGGGTAAAATGA  
GATCTAGCATGAGCCGCACGGAGCTGCGAGCACGGTTTGGAGTTTTTGGAGAAATTGAGG  
AATGCACAGTAAATCTGCGGGACGATGGCAATTGTTACGGATTATCACCTATCGCTACA  
CCTGTGACGCTTTCGCTGCTCTTGAAAATGGATACACGCTGCGCAGGTCAAATGGGCCAG  
ACTTTGAGGTTTGCTTTTGTGAAAGAAAGCAGGTGTGCAAGTCCAACATATGCAGACTTAG  
ATTCAAATTCAGATGACTTTGATCCTGCTTCCACCGAAAGCAAGTACGACTCCATGGATT  
TTGACAGTTTGCTCAAGGAGGCG

>Tibetan\_frog\_PPARGC1A

ATGGCGTGGGACATGTGCAACCAGGACTCTGTATGGAGTGACATAGAGTGTGCTGCTCTG  
GTTGGTGAAGACCAGCCCCTTTGCCAGATCTTCCAGAGCTGGATCTTCTGAACTCGAT  
GTGAACGATTTGGATGCAGACAGCTTTTGGGTGGATTAAAGTGGTACAGTGACCAATCA  
GAAAACATTTCCAATCAATACAGCAACGAGTCATCAAACATATTTGAGAAAATTGAGGAG  
GAGAATGAAGAGAACCTGCTAGCAGTTCTTACAGAAACACTGGACAGTCTCCCTGTGGAC  
GAGGATGGATTGCCTTCTTCGATGCACTGACAGATGGAGATGTGACCAGTGAACATGAT  
CCCAGACTTTTATCCCTGCCTGACGGCACCCCTCCAACACAGGAGGCAGAAGAGCCGTCA  
CTACTTAAGAAGCTCTTACTGGCTCCAGCGAACACTCAGCTGATTTATAATGAATGTGTC  
GGACTCAGTGCACACAACCATGCAAGCCCTAATCAGAGGATCAGAACAAGCTCTGCACCT  
GTTAAGAGCGGAACTGTTGGAGCAATAAACCCAGAAACATTTGTCAACCGCAGAAGCCA  
CAGAGGCGCCCCTGCTCGGAGCTCCTTAAGTACCTGACTGCAAATGATGACTCTCCTCAG  
ACCAAATCAACAGAGAGCAGGACGAATAACAGACTTGACAAATGCACCAAAAAGAAGCCC  
TGCTTGATCCTCTGCCACATTTTCAAGCCAAGTCAACGAATCTGTCCCTTCTCTGACA  
CCCAGTCAACAAATGACCCCAAGGGTTCCCATTTGAGAGCAAGACTATTGAACGAACC

TTAAGTGTGGAGCTCTCTGGAAGTGCAGGACTAACTCCACCAACAACACCACCTCACAAA  
GCCAACCAAGATAACCCATTTCAGGACTTCTACCAAGCCGAAGTCTTCTTGTAGCCTGTT  
GTGCCCCCGCTAAGAAATCTCGCTACATTGAGTCTTCCACTATTCAAGTTATTAAGTCT  
AAAAAAGGTCCCGAACAAATCTGAACTGTATGCACAGCTGAGCAAAACCTCCGTGGTCATT  
GGACAAGAGGAGAAAAAAGTGAAGCGACCTAGTTTACGGCTTTTTGGTGACCATGATTAC  
TGTCAGTTTATGAATTCAAAATCAGAAATACGTATAAGCTTAACACAAGAATTACAGGCC  
TCAAGACAACCTGAATGTAAGGATCCTCTGCCTGGGAAAAAAGTACAGATCTATTCAACT  
AAAAAACAGGAGAACCTGAAAGACAGTTTTGAGTTGGCGATGCCAAGTCCTCAGAATGGC  
AATAGGAAGCCACTGCAAGACCAAGAGATCCGTGCAGAACTTAATAAGCACTTTGGTGAC  
CCAACACAAGCAGTCTATGAGGAAGAGAACAAAATGGTGATGCAAGGAGCAATGATTAC  
AGTGTGATCAATTCTCTAGACTACCTATGTTTTAACCTCTGGACTGGGTATGGATAAT  
TTGTTTGATGAAAGCGAAGATGAAAATGACAACTGTGCTATTCTGGGATGGAATACAA  
TCCTATTCATTGTTTGACGTATCACCTTCTGCTCAACTTTCAATTCTCCAAGCAGATAT  
TCTGTTTCCCAACATCCCTTTATCGCAAAGGATATGTTCTCGGTGAGATCTAGA  
TCTTATTCTCAAACAGATCATGTTCTCAGTCTCCATATTCACGTTCAAGATCAAGATCT  
CCATCCAGCAGATCTTCTCAGGGTATGCTGCTGCTATGATACTGATCATTGTAGACCC  
ACAATTCTGCAGTCTGTGCACGATCACGGTCAAGATCCCATAACAATCGTAGGCCAGA  
TACGACAGTTATGAGGAATACCAACATGAGCGGCTGAAGAGGGAGGAATACCGCAAAGAG  
TATGAGAAACGTGAATCAGAGCGAGCCAAACAAAGGGAACGGCAAAGGCAAAAAGCAGTT  
GAGGAACATAGAGTTCTCTACGTCGGTAAGATGAGAACGAACATGACCCGTAGTGAAGT  
CGAGCCCGTTTTGAAGTTTTGGTGAAATTGAAGAATCTACAGTCAATCTGCGGGATGAC  
GGAGACTGTTACGGTTTCATCACCTACCGCTACACCTGTGACGCATTTGCTGCTTTGAA  
AATGGATATACTCTGCGCAGGTCAAATGAACACGACTTTGAGCTATGCTTTTGCGAACGA  
AAGCAGTTTTGCAAGTCCAATATGCAGATTTAGATTCAAATTCAGATGACTTCGATCCT  
GCTTCCACCAAAGCAAATATGACTCCATGGATTTTGACAGTTTGCTTAAAGAGGCACAA  
AGGAGCCTGCGTAGG

>southern\_platyfish\_PPARGC1A

ATGGCGTGGGACAGGTGTAACCAGGACTCGGTGTGGACAGAATTAGAGTGTGCTGCCTTG  
GTTGGTGAAGACCAGCCCCTCTGCCAGACCTTCTGAACTTGACCTCTCAGAGCTGGAT  
GTCAGCGACTTGGATGCTGACAGCTTCTGGGTGGCCTTAAATGGTACAGCGACCAATCA  
GAGATCATTTCTCCAGTATGGGAATGAAGCGTCTAATCTTTTTGAGAAGATAGATGAA  
GAAAATGAGGCCAACTTACTGGCAGTGCTTACAGAGACCCTGGACAGCATCCCGGTGGAT  
GAGGACGGATTGCCTTCTTTGAGGCCCTGGCAGATGGGGACGTGACCAATGCCAGTGAC  
CGGAGCTGTCCCTCTCCAGACGCCTCACCTCACACCCAGAGCCCGAGGAGCCTTCT  
TTGCTGAAGAAGCTCCTTCTGGCGCCCGCAAACCTCCAGCTCAGCTATAATCAATACACA  
GGTGGCAAGGCACAGAACCATGCAGCCAGCAGCAACCACCGGATCAGACCACCACCTGCC  
GTCGTCAAGACGGAGAACCCTGGAGCGGCAAGCAAGAGGGGGCTCCGGCCAACAGAAC  
CGCCCGGTGAGGCGACCTTGCAGTGTGCTCAAATACCTAACAGCCACTGATGACATC  
CTGCTACACACCAAAGCCAGCGATGCCAAGAGCGCCTGGGGGGTCCCAGTAGCAGGGAC  
AAGAGTAGCCTGGGTCTCAGTGCCTCATCCTCGTCCATCCTCGTCATCCACC  
TCTTCGTTCTCCTCCCTGTCTTCCACTTCTTCTCCTCTTCGTCCACCACCTCCAAGAAG  
AAGTCGGCTGTGTCATCACAACAACAGCAGCAGCAGTCGCCGAGCAGCATCACCAGCGA  
GCCAAACCAACCACCTTGCCACTTCTTTGACCCAGAGTCTCAAATGACCACAAAGGA  
TCACCTTTGAGAACAAAACCATTGAACGCACATTAAGTGTGGAGATTGCTGGAACCCCA



GGTCTGACACCACCTACCACGCCCCACACAAAGCCAGTCAAGAGAATCCTTTCAAAGCA  
TCTCTGAAAACCAAGTTGCTCCTCATGTTGCTCCTCTGCCTTGACGTGCAAAAGAGCCAGG  
CTGAGTGAGTTGGGCGCCGGCGCTTTGGCCCCGGCCCCAGGTGCCTCAGCCAGGGGCCCT  
GCCAGGAAGGGTCCCGAACAGACTGAGCTCTATGCGCAGCTAAGCAAAGCATCCACCGCC  
CTCCCTTACGCCATCGCTCGACGTGCACTGGGGGGCGGCCCTTGAGGGGCACTGCAGCACT  
GGCAACAACAAGCGGGCCACTGGGCAGGATGGCCACAGCGACCATGACTATTGCCAGGCA  
CTGGCTGCTTGTAAAGATGGATGGGGGCATATCCGCTGTTTCCATGGCTACATCTTTGGAA  
ATGACATTCACCCCAGGTGCCACCTCCACTGGCAAGGTGGAGAACAGGCATGTGAATGT  
ATGGACTTAGTCATGTCAACATCGTTTCTATCATCTTCTTGTCTACATCATCATCCTCT  
CTTAGTCATTTGACTAAAGAGCAGAAATGTGTCCCGTGGATGGAGATGCTTGCCGTGTC  
AGGGGCTTAGGGGAGCGTACCCTTCCACAAACCACTCAGATACCCACACAGGGGGGCACT  
GCTGTTAGGGACCAACTGCAACTTTCTGCCACCAGCCGGAAGCCCCTGTGCGACCAGGAA  
ATCAGAGCAGAACTCAACAAGCACTTTGGCCCTCCCCTGCAAGCCCTTTATACTCAGGGT  
GAGCAGGAGAGAGACGATAGCAGTAAACCAAACAAGCCTACAACACCCCTGTCCCCTGAG  
GGGGGAGAGATACACTTTTACTCCCAGAGACTGTCTGGATCCAGCTACCTGCACCCAGGG  
TTTCTGTCCTTTATAATGAGCTGGAGCTGGATGATGGCCGTGAGAGTCGCTTCATCTTT  
CCATGGGAGGGCACCCCTCTGGACCTACTCTTTGACTGCTCTCCCATTCTCCCTCCTGT  
TCCCCACCATCCACTTGCTCCCCTTACAGAGGCTCCATCTCTCCACCGTCTCCCTTCTC  
CTGTCACCTAGTCGACCGTTCTGCTGGACCAGCAGCGGGTCCCGTTCCTGTTACGGTCC  
CACTCTGGCTCCCGCAGCTCCTCATCACGATACCGCAGGCGCTCTCTGTCCAGCTACCA  
GACAGACTCCAAAGGACTCCAAATCACTTTACTATGGTCTCATCATAGCTCAGATCTG  
AACGCTGTCCGCTCCAGACTCCATAAGAGCCCTCACCTCAGTCCCGGTCTCCGCTCAGC  
CACAGGCCAAGGTACGACAGCTACGAGGAGTACCAGCACGAGAGGCTTAAGAGGGGAGGAG  
TACCGACTGGATTATGAGAAGCGGGAGTTTAAAAGGGCCGAGCAGAGGGAGAAGCAAAGG  
CAAAAAGCCATAGAGGAGAGACGGGTGGTGTACGTGGGGCGACTGAGGTCCGACTGCAGC  
CGATCAGAGCTGAAGCGCCGCTTTGAAGTCTTTGGGGAAATTGAAGAATGTGCAGTGAAC  
CTGAGGGACGATGGGGACAATTTGCGCTTCATCATGTTCCGCTACACCTGTGACGCCTTT  
GCCGCCCTTGAGAACGGACACACCCTACGCAGGTGCAACGAGCCTCAGTTCGAGTTGTGT  
TTTGACGGACAAAAGCAGCTCTGCAAATCACGATACACAGACTTGGACTCCCATTGCGAC  
GACTTTGATCCGACTTCCACGAAGAGCAAGTATGACTCCATGGATTTTGATAGCTTGCTG  
AAAGAGGCCAGTGCAGCCTGAGAAGG

>spotted\_gar\_PPARGC1A

ATGATGGAAGGTTATGCGCTTTCTGAAGATGCATTATTTCTCCTGCCTTTACAACCTAC  
ACCTGGGAAAATCCATACGACCAGTGTGCTGCCTTGGTTGGTGAAGACCAGCCTCTCTGC  
TCCGACCTCCCAGAGCTTGACCTTTTACAGAGCTAGATGTCAGTGACCTTGATGCTGATAGT  
TTTCTGGGAGGACTCAAATGGTACAGTGACCAATCAGAAATCATTTCAGTCAGTATGGC  
AGTGAACCTTCAAATCTGTTTGAAGAAGATAGATGAAGAAAATGAGGCCAACTTGCTGGCA  
GTTCTACCGAGACCCTGGACAGCCTCCCGGTGGATGAGGACGGATTGCCTTCATTCGAT  
GCTCTGGCAGAAGGCGACGTGACCAACACCAGTGATCAGAGCTGCCATCCTCACCTGAT  
GGCTCTCCTCCCACACCAGAAGCAGAGGAGCCATCTCTACTAAAGAAGCTTTGCTGGCA  
CCAGCTAACTCCCAGCTCAGTTATAATCAATACACAGGTGGCAAGGCACAAAATGAGGCT  
CCTAGTAATCAAAGGATCAGACCAACACCTGCTGTTGTCAAGACAGAAAACCCATCCTGG  
AATAATAAGCAGAGGGTCCCCTGTGACGAGCAGCAGAAGCCCACACGACGCCCTTGTGCC  
GAGCTTCTCAAATACCTAACAGCCAGTGACGAGACCATCCAGACCAAAGCCTGCGAGCAG

AAAAGCGGTGGGGGTAGCAGCAGCAAAGTAAAAAGCGGAGGTGCCTCTTCATCCTCATCC  
TCTGTTGCCTCCTCCTCCTCATCCTCTTCTAAGAAGAAGCCAGTTCATCCCTCTCAGCAG  
CAGCTGCATCACCAGCGAGCCCTTAGGAACGGCCATGGCAATCCCCGCGTCAAAGGGAA  
CGCACGCAATCCAGTGAAGAAGGAAGGCCGCCAGGTCAGCAACCTGCCCTGGATGCTGGG  
GTCCTGGCAGCCGCTAGATTCAATTAGGTACATGCATTCTTATTCTCTCCGTCCTAGAGAG  
AAAGATCCGTCAGGCAGGTGCGAGCAGTGTATGAAGAGTACAGAAACCAAAGTACTTTA  
GGTAGCACCCATCGGAGAAGGGATGAATTTGACAGGCCCATCCAGGGCATGTAAAAGTG  
ACCATTAAGAAAAGAGAAGATCTCGGAGTTCGATTGCATGGGGAGATGCAGAACTCTAAA  
CAACAACAGTATAACTGTCGGGCCAGAAACGTAGTCCACCGTTACCGACCGAGACAGAG  
AGGGAAGAGATTAGGAGTGCTCGCCAAGTAGGTCTTCGCAGCGTCCCCATGAAGAAGAAA  
CGCCCAAGCAAGAGCGGTGAGAGAACGGAGAGGCGAGCATGCAGCCAGACAGAGCTGTC  
AGGAAATGGGCTGCTCAACCCAGTCTCCAGTCCCTGCTTCTGGAAGGGGTAGGCGTTGAT  
CGCTGGGGTAGTGAGACAGATGAAGAGATGGCGCGGGAAGCGAAAGGCAGGGCGGAGCAG  
GTCTGCTGTGGTGGGAATGGTGGCCACAATCATGTCATGGGCAGCCCCATGCAGCTCTCA  
CTGGGGCCCCCAAGCTCCCTCTTCCCGACTCTATTATTCCAATAGGAGACCTCACACCC  
TCCGTACACAAGAGCACCACCTTTACAGGCAGGCATTCTGCAAGTACCAAGATGACCAG  
GTCCTCCCTGTTAGCCAAACCAACCACCTTGCCACTTCTTTGACCCAGAGTCTCCA  
AATGACCAAAAAGGATCTCCATTTGAGAACAAAAGCATTGAACGACATTGAGTGTGGAG  
CTCTCTGGAACAGCAGGTCTGACACCACCTACCACTCCTCCACACAAGGCCACTCAAGAA  
AATCCTTTCAAACCTTCAGTCAAGCCCAAGTTGTCTTCATGCAGCTCCTCAGCTCAAGCA  
AGTAAAAGACCTACTACAGTGATTCTGCTGTTTGCCCTCTATCAAAAAGGGTCCAGAA  
CAGACTGAGTTGTATGCCAGCTTAGCAAAGTCTCTGCATTACCTGCAGGGCAGGAGGAC  
CGCAAAAAGCAAGCGCTCCACTCTGCGTCTGTTTGGTGATCACGATTATTGCCAGTTTGT  
AGCACAAAAGAGACATTTCCCTGGCCTACTCAGTGGAATCTCAGGATGGGAGGCAACTG  
GAATGTTGGGACTTGGTCTGTCTCCCTCCTCTTTGGCTGTGCAGCAGCAGAATTACTCT  
TCGCTGACCAGGACCTCTGGTGAACAGGGAAGGCAAACAGCTGCAGACATATCAAAAC  
AGGCAGCAGGTAACAGCAGGAAGCCGCTCCGAGACCAAGAGATCAGGGCGGAACTCAAC  
AAGCACTTTGGTAACCCAAAACAAGCCATTTACAATGAGGATGAAAAGGCTGGCCCCCAG  
CAGAGAGATGAAAGTACTCTGAATATTACTACAACTGACTGACTACGTGCACCCAGGC  
CTGCCATGGAAGGGGTTTTGACGACAGCGAGGATGAGAACGAGAAGTTTCTCTACCCC  
TGGGAAGGGACCCACCTGGACTTGTGTTTGGGGGTTCTCCATCCTGTTGCTTCCAGT  
TGCTCCCCTTCAAGGAGCTCTGTCTCCCCTCCCAAATCCCTCTTCTTCCAGCGCTGT  
CACTGGTCCAGGTCAGCGTCTCACTCCAGGTCCCGGTGCGGATCTTCGTCTTGCCACCGG  
CGGCGGTCTTACTCCGATCTCCTTACTCAGCTCCAGATCAAGGTCCCCCTACAGCCGG  
TCCTCCTCACGGTCTCATCACTGTGTGGATTCCAGCAACACTAGACCAAGGTCTCGCAGA  
AGCCCACCCATACATTCAAGATCACAGTCTAGATCCCCCTTCAAGTCCGAGGCCAAGGTAC  
GACAGCTACGAGGAGTACCAACATGAGCGACTTAAGAGGGAGGAGTATCGACGAGATTAT  
GAAAAACGCGAGTTTGAAAAGAGCCGAACAGAGAGAGAGGCAGAGGCAAAAAGGCAATTGAG  
GAGAGACGCGTGGTGTATGTGGGAAGACTAAGGCCTGACATTACCCGGACGGAAGTGAAG  
CGCCGCTTTGAAGTGTGGTGAATCGAAGAGTGTGCAGTCAATTTGAGAGATGACGGG  
GATAATTTGGCTTCATCACCTACCGCTACACTTGTGATGCTTTTGCTGCTCTGGAAAAT  
GGACACACCTTACGCAGATCTAATGAACCTCAGTTTGAGCTGTGCTTCGGTGGACGAAAG  
CAGTTCTGCAAATCAAATTATACAGACTTGGATTCCATTCTGATGACTTTGATCCATCA  
TCCACAAAGAGCAAGTATGACTCCATGGATTTGATAGTTTGTGAAAGAAGCACAGCGC

AGCCTGCGAAGG

>guppy\_PPARGC1A

ATGGACGGTTATGGTCGGACCGAAGATGAGCTGTTCTCCTCCTGCCTTCTGAACCTC  
ACCTGGGAGACTTGCTACGAGCAGTGTGCTGCCTTGGTTGGTGAAGACCAGCCCCTCTGC  
CCAGACCTTCCTGAACTTGACCTCTCAGAGCTGGATGTCAGCGACTTGGATGCCGACAGC  
TTTCTGGGTGGCCTTAAATGGTACAGCGACCAATCGGAGATCATTTCTCTCAGTATGGG  
AATGAAGCGTCTAATCTTTTTGAGAAGATAGATGAAGAAAATGAGGCCAACTTACTGGCA  
GTGCTTACAGAGACCCTGGACAGCATCCCCGGTGGATGAGGACGGATTGCCTTCGTTTGAG  
GCCCTGGCAGATGGGGACGTGACCAATGCCAGTGACCGGAGCTGTCCCTCCTCCCCAGAC  
GCCTCACCTCACACCCAGAGCCTGAGGAGCCTTCTTTGCTGAAGAAGCTCCTTCTGGCG  
CCTGCAAACCTCCAGCTCAGCTATAATCAATACACAGGTGGCAAGGCACAGAACCATGCA  
GCCAGCAGCAACCACCGGATCAGACCACCACCTGCCGTCGTCAAGACGGAGAGCCCCTGG  
AACGGCAAAGCAAGAGGGGGGCTCCGGCCAACAGAACCGCCCGGTGAGGCGACCTTGCACT  
GAGCTGCTCAAATACCTAACAGCCACTGATGACATCTGCTACACACCAAAGCCAGCGAT  
GCCAAGAGCGCCTGGGGGGGTCCCAGTAGCAGGGACAAGAGTAGCCTGGGTCTCAGTGCC  
TCATCCTCGTCTCGTCCATCCTCGTCATCCACCTCCTCGTTCTCCTCCCTGTCTTCC  
ACTTCTCCTCCTCTTCGTCACCGCCTCCAAGAAGAAGTCGGCTGTGCCATCACAAACAG  
CAGCAGCAACAGCAGCAGCAACAGCAGCAGCAACAGCAGCAGCATCAGCATCAGCAGTCG  
CCGCAGCAGCATCACCAGCGAGGTGAGAGCCGGGCTGCAGGCGAGTGTATTGTGGCTGGT  
CATGGGGCTGGGAAGTGGCAGCGTTGCTCTCACGATGACGGGGTTGAGGATTCCGAGGGT  
GCCTCTGTCCCTGTTGGTGCAGAACCTACACCTGCGGCCATGCTCGCCCCAAACAGGAG  
CACGGGCCACCCAATGAAGAAGGAAGGCCGCCAGGCGATGTTGGCCGCTGGCCGCCGCT  
AGGTTCAATAGTGACCACAAAGGATCACCTTTGAGAACAAAACCATTGAACGCACATTA  
AGTGTGGAGATTGCTGGAACCCAGGTCTGACACCACCTACCACGCCCCACACAAAGCC  
AGTCAAGAGAATCCTTTCAAAGCATCTCTGAAAACCAAGTTGTCCTCGTGTGCTCCTCG  
GCCTTGACGTGAAAAGAGCCAGGCTGAGTGAGTTGGGCGCCGGCGCTTTGGCCCCGGCC  
CCAGGTGCCTCAGCCGGGGGCCCTGCCAGGAAGGGTCCCGAACAGACTGAGCTCTATGCG  
CAGCTAAGCAAAGCATCCACCGCCCTTCTTACGCCATCGCTCAACGTGCACTGGGGGGC  
GGCCTTGAGGGGCACTGCAGCACTGGCAACAACAAGAGGGCCGCTGGGCAGGATGGCCAC  
AGCGACCATGACTATTGCCAGGCACTGGCTGCTTGTAAAGATGGATGGGGGCATATCCGTT  
GTTTCCATGGCTACATCTTTGAAATGACATTCACCCGGGTGCCACTTCCACTGGCAAG  
GTGGAGAACAGGCACGTCGTGAATGTATGGAAGTCACTAGTCATGTCAACATCGTTTCTGTCA  
TCTTCTGTTCTACATCATCTCACTTAGTCATTTGACTAAAGAGCAGAAATTTATC  
CCCATGGATGGAGATGCTTGCCGTGTCAGGGGCTTAGGGGAGCGTACCCTTCCACAAACC  
ACTCAGATACCCACACAGGGGGGCGAGTGTGTTAGGGACCAACTGCAACTTTCTGCCACC  
AGCCGGAAGCCCCTGTGCGACCAGGAAATCAGAGCAGAACTCAACAAGCACTTTGGCCCT  
CCCCTACAAGCCCTCTATACTCAGGGTGAGCAGGAGAGAGAAGATAGCAGTAAACCAAAC  
AAGCTACAACCCCCAGTCCCCTGAGGGGGGAGGGACTGACTTTTACTCCAGAGACTG  
TCCGGATCCAGCTACCTGCACCCAGGGTTTCTGTCCTTTCAAGACGAGCTGGAGCTGGAT  
GATGGCCGTGAGAGTCGCTTCTTTCCATGGGAGGGCACCCCTCTGGACCTACTCTTT  
GACTGCTCTCCTCGTTCTCCCTCCTGTTCCCCACCATCCACTTGCTCCCCTTACGAGGC  
TCCGTCTCCCACCGTCTCCCTTCTCCTGTACCTAGTCGACCGTTCTGCTGGACCAGC  
AGCGGGTCCCGTTCCTGTTCCAGTCCCCTCCGCTCCCGCAGCTCCTCATCACGATAC  
CGCAGGCGCTCTGTCCAGCTACCAGACAGACGTCCCTCCTTGGTCTCATCACAGC

TCCGATCTGAACGCCGTCGCTCCAGACTCCATAAGAGCCCTCACCTCAGTCTCGATCT  
CCGCTCAGCCGCAGGCCAAGGTACGACAGCTACGAGGAGTACCAGCACGAGAGGCTTAAG  
AGGGAGGAGTACCGACTGGATTATGAGAAGCGGGAGTTTCGAAAAGGCCGAGCAGAGGGAG  
AAGCAAAGGCCAAAAAGCCATAGAGGAGAGACGGGTGGTGTACGTGGGGCGACTGAGGTCC  
GACTGCAGCCGTTGAGAGCTGAAGCGCCGCTTTGAAGTCTTTGGGAAAATTGAAGAATGT  
GCAGTGAACCTGAGGGACGATGGGGACAATTTGGCTTCATCATGTTCCGATACACCTGT  
GACGCCTTTGCTGCCCTTGAGAACGGACACACCCTACGCAGGTGGAACGAGCCTCAGTTT  
GAGTTGTGTTTTGACGGACAGAAGCAGCTCTGCAAATCACGATACACAGACTTGGACTCC  
CATTCGGACGACTTTGATCCGACTTCCACGAAGAGCAAGTATGACTCCATGGATTTGAT  
AGCTTGCTGAAAGAGGCCAGTGCAGCCTGAGAAGG

>American\_alligator\_PPARGC1A

ATGGCGTGGGACATGTGCAACCAGGACTCTGTATGGAGTGATATAGAGTGTGCTGCTCTG  
GTTGGTGAAGACCAGCCTCTTTGCCAGATCTCCAGAAGTGGACTCTCCGAAGTAGAT  
GTGAATGATTTGGATGCAGACAGCTTTCTGGGTGGACTCAAGTGGTACAGCGACCAATCA  
GAAGTTATTTCCAATCAGTACAACAATGAATCATCAAATATATTTGAGAAGATAGATGAA  
GAGAATGAGGCAAATTTGCTGGCAGTTCTCACAGAGACACTGGACAGTATCCCTGTGGAT  
GAGGATGGATTGCCTTCATTTGATGCACTGACAGATGGAGAAGTGACCAATGAAAATGAT  
ACTAGCCCTTACCAATGCCTGACGGCACCCCTCCAGCTCAGGAGGCAGAAGAGCCGTCT  
CTACTTAAGAAGCTCTTGCTGGCTCCAGCCAACACTCAGCTAAATTACAATGAATGCAGT  
CGCCTCAGCACACAAAACCATGCAAACACTAATCACAGGATCAGAACAAGCCCTGTGGTT  
GTTAAGACCGAGAATTCATGGAGCAATAAAGCAAAGAGCATTGTCAACAGCAGAAGCCA  
CAAAGACGTCCCTGCTCTGAGCTTCTCAAGTATCTGACTACAAATGATGACCCTCCTCAG  
ACCAAAGTACAGAGAACAGGAACAGCAGCAAAGACAAATGCAACTCCAAAAAGAAGCCC  
CAACTGCACTCTCAGGCACATCATTGCAAGCCAAACCAACAAGTTTATCACTTCCTTTG  
ACACCTGAGTCACCAAATGATCCCAAGGGTTCCCATTTGAGAACAAGACTATTGAACAA  
ACCTTAAGTGTGGAAGTCTCTGGAAGTGCAGGCCTAACTCCACCTACGACCCCTCCTCAC  
AAAGCCAACCAAGATAATCCTTTTAGGACTTACCTAAGCCGAAGTCATCATGCAAGACT  
ATTGTACCACCTCCAAAAAGCCTCGCTATAGTGAGTCTTCCAGTTCTCAAGGAAATAAC  
CCAATCAAGAAGGGTGCAGATCAGTCTGAGCTGTATGCACAGCTCAGCAAGACAACAGTA  
CTGTCCAGTGGACATGAGGAGAGAAAGACAAAACGGCCTAGTTTGGGCTGTTTGGTGAC  
CACGACTATTGTCAGTCTGTGAATTCAAAATCAGAAATACATATTAATATATCCAGGAA  
CTTCAGGAGTCCAGACAAGTAGAATTTAAGGATTCTTACCTGCATGGCAGTGTGAGATT  
TGTTCTCTTTAGAACAAGACCAGTATTACAAGAAAGAGACTTTACAGACAAATAAGCAG  
GGTTCCCACTGCAATAATAGAAAGCAGCTCCAAGACCAGGAAATCCGGGCTGAACTGAAT  
AAGCACTTTGGTCACCCAGCCAAGCTGTTTTTGAAGAAGAGGCAGATAAGACCAGTGAA  
CTGAGGGACAGTGATTATAGTAATGAACAGTCTCCAAACTACCTATGTTTATAAATTCA  
GGACTAGCAATGGATGGTCTCTTTGATGATAGTGAAGATGAAAGTGATAAACTATGCTAC  
CCTGGGATGGGACTCAAACCTATTCTTTGTTGATGATCGCCTTCTTGCTCTCTTTT  
AACTCTCCATGCAGAGATTGAGTGTCTCCATCCAAATCTTTATTTCTCAAAGATCCCAA  
AGGATACGCTCTAGATCAAGTCTTTTCTCAACGCAGGTCTTGTTCCTGTTCTCCATAT  
TCCCGATCGAGATCAAGATCGCCATGTAGCAGATCCTCTTCAAGATCTTGTTACTATTAT  
GAGTCCAGCCACTGTAGACACCGAGCATACAAAAGTTCTCCCTTACATGCAAGGTCACGA  
TCCAGATCACCCGTAATCGTAGACCCAGATATGACAGCTATGAGGAATATCAGCATGAA  
AGGCTGAAGAGGGGAAGAATACCGCAAAGAGTATGAAAAACGGGAATCGGAAAGGGCCAAA

CAAAGGGAGAGGCAGAGGCAGAAAGCTATTGAAGAACGTCGTGTGATATATGTGGGTAAA  
ATCAGACCTGACACAACCTCGAACAGAACTGAGGGACCGCTTTGAAGTTTTTGGTGA AAT  
GAGGAGTGCACAGTAAATCTACGGGATGATGGAGACAGCTATGGTTTCATCACCTACCGC  
TATACTTGTGATGCTTTTGCTGCTCTTGAAAATGGATACACTTTACGCAGGTCAAATGAA  
CCTGACTTTGAGCTGTACTTTTGTGGACGCAAGCAATTTTGCAAGGTAACTATGCAGAC  
CTAGATCAAACCTCAGATGATTTTGATCCTGCTTCCACTAAAAGCAAGTATGACTCCATG  
GATTTTGATAGTTTACTGAAGGAGGCACAGCGAAGCCTGCGTAGG

>Armadillo\_PPARGC1A

ATGATTATGACCATCCAAAATAGCCTTGGTGATAAGCAGCCAGCTGGGGTAGAGTGTGCT  
GCTCTGGTTGGTGAAGACCAGCCTCTTTGCCAGATCTTCTGAACTTGACCTTTCTGAA  
CTAGACGTGAATGACTTGGATACAGACAGCTTTCTGGGTGGACTAAAGTGGTGCAGTGAC  
CAATCAGAAATAATTTCCAATCAGTACAACAATGAGCCATCAAATATATTTGAGAAGATA  
GATGAAGAGAACGAGGCCAATTGCTAGCAGTCTCACTGAGACACTGGACAGTCTCCCT  
GTGGATGAAGACGGATTGCCCTCATTGATGCGCTGACAGATGGAGATGTGACCACTGAC  
AATGATGCTAGTCTTCTCCATGCCTGACGGCACCCCTCCGCCTCAGGAGGCAGAAGAG  
CCATCTCTACTTAAGAAGCTCTTACTGGCACCGGCCAACACTCAGCTAAGTTATAATGAA  
TGCAGTGGTCTCAGTATCCAGAACCATGCAAATCATAATCACAGGATCAGAACAAGCCCT  
GCAGTTGTTAAGACTGAGAATTCATGGAGCAATAAAGCGAAGAGCATTGTCAACAGCAA  
AAGCCACAAAGACGTCCCTGCTCAGAGCTTCTCAAGTATCTGACCACAAACGATGACCCCT  
CCTCACACCAAACCCACAGAGAACAGGAACAGCAGCAGGGATAAATGCACCTCCAAAAAG  
AAACCCCCACACAATCTCAGTCACAGCATTGCAAGCCAAACCAACAACCTTTATCTCTT  
CCTCTGACCCAGAGTCACCAAATGACCCCAAGGGTTCCCATTTGAGAACAAGACTATT  
GAACGAACCTTAAGTGTGGAACCTCTGGAACCTGACAGGCCAATCCACCCACAACCTCT  
CCTCACAAGCCAACCAAGATAACCCTTTTAGGGCTTCTCAAAGCTGAAGTCTCTTGC  
AAGACTGTGGTACCACCACCATCAAAGAAGCCCCGGTACAGTGAGCCTTCTGGTACCCAC  
GGAAATAACTCCACCAAGAAAGGGCCAGAGCAATCTGAGTTGTATGCACAACTCAGCAAG  
ACCTCAGGACTCATCAGTGGACATGAGGAAAGGAAGACTAAGCGGCCCACTCTGCGGCTG  
TTTGGTGACCATGACTATTGTGAGTCAATTAATCCAAAACAGAGATACTCATTAAATATA  
TCACAGGAGCTCCAAGACTCTAGACAACCTAGAATATAAAGATGCCTCCTCCGATTGTCAG  
GGGCAGATTTGTTCTCCACAGATTGAGACAGTGTACCTGAGAGAGACTTCGGAGGGCA  
AGCAAGCAGGTCTCTCCTTGCAGCACCAAGAAACAGCTCCAAGACCAGGAAATTCGAGCC  
GAGCTGAACAAGCACTTTGGTCATCCAGCCAAGCTGTTTTTGACGACGAAGCAGACAAG  
ACCAGTGAACCTGAGGGACAGTGATTTAGTAAAGCAAGTCTCAAACCTACCTATGTTT  
ATAAATTCAGGACTAGCCATGGATGGCCTGTTGATGACAGCGAAGATGAAGGTGATAAA  
CTGAGTTACCCTTGGGATGGCACGCACTTATTGTTGATGTTGCGCTTCTTGC  
TCTTCTTTAACTCTCCATGTAGAGATTCCGTGTCGCCACCCAAATCCTTATTTCTCAG  
AGACCCCAAAGGATGCGCTCTCGTTCAAGGTCTTTTCTCGACACAGGTGATGTTCCCGA  
TCATCGTATTCCAGGTCAAGATCAAGGTCTCCAGGCAAGTATGATCCTCTTCAAGATCTTGC  
TACTACTATGAGGCTAGCCACTGCAGGCACCGCATGCACCGAAATTCACCCTTGTGTGCG  
AGATCAGGCTCCAGGTACCCTATAGCCGTAGACCCAGGTATGACAGCTACGAGGAATAT  
CAGCACGAAAGACTGAAGAGGGGAAGAATACCGCAAGGAGTATGAGAAGCGGGAGTCTGAG  
AGGGCCAAGCAAAGGGAGAGGCAGAGGCAGAAGGCGATTGAAGAACGCCGTGTGATTTAT  
GTTGGTAAAATCAGACCTGACACAACACGGACAGAACTGAGGGACCGTTTTGAAGTTTTT  
GGAGAAATGAGGAGTGCACAGTAAATCTGCGGGATGATGGAGACAGCTATGGTTTCATC

ACCTACCGTTATACCTGCGATGCTTTTGTGCTCTTGAAAATGGATACACTCTGCGCAGG  
TCGAATGAAACTGACTTCGAGCTGTACTTTTGTGGACGCAAGCAATTTTCAAGTCTAAC  
TATGCAGACCTAGATTCAAACTCAGATGACTTTGACCCTGCTTCCACCAAGAGCAAGTAT  
GACTCTCTGGATTCGATAGTTTACTGAAAGAAGCTCAGAGAAGCTTGCGCAGG

>American\_alligator\_SOD3

ATGTTTCTATCCCTTTGTCTGGTATCCGTGGGGCTGTTCTATCCTTACCTGGTGTGTA  
AGCGGAGAATTGGAGCCTGTTCTGAAACAGAAGGCCTGTTCAAGAATTACGGAAAAAA  
GTGAATGACTTGTGGCAGAATTGCTCTACCCACAATTTATCAGAGACAGTACTGGACG  
GCTTACGCTACTTGTGAAATGAAGCCCAGCTCCAAATTAGATGCTGACAAACCACAAGTG  
ACAGGACAAATCTTGTCAAACAGTCCTACCCAATTGAAAAGCTAGAAGCTTTCTTTGAC  
CTGGATGGGTTTCCATCAGAGAACAATCAGTTGGGTAGGGCTATTTCATATCCATAAGTTT  
GGAGACCTCAGCGACGGCTGTAACACTACTGGAGGACACTATAACCCCTTCAATGTGAAC  
CATCCTCACCATCCAGGGGATTTTGGCAACTTCTACTCTAAAGAAGGCAAAATTAGAAAA  
TACAAGTCAAACCTGTCTGCTACTCTGTTTGGCCATATACCATTATGGGCAGATCTGTC  
GTTATTCATGAGCAGGAAGATGACATGGGCAAAGGTAACAATAAGGCCAGTTTGGAGAAT  
GGAAATGCGGGCAGACGTCTGGCTTGTGTGTCATTGGGATATGCGACAAGAACATGTGG  
GAGAATAAATTCTCAAGTTTGTAGAAAGGAAGAAAAGAGGCTCACAAAATGAGCACAGA  
AGCAGGCCCAAC

>Armadillo\_SOD3

ATGCTGGCACTGCTGTGTTCTGCCTGCTCCTGGTGGCCGCGCTTCTGCGCCTCCACC  
GGCTGGGACCCGGAGGAGCCAGCTCCAGCACGGAGGAGCAGATCCGCGACATGCACGCG  
AAGGTGAGGGAGATCTGGCAGGAGCTGCTGCAGCGCAGGCCGGCGGACGGCGGGCGGAC  
TCGGCGCTCTACGCCGCTGCCAGGTGCAGCCGTCGGCCGCGCTGGACGCCGCGCAGCCC  
CGGGTCTCCGGCCTCGTCTCTTCCGGCAGCCGGCGCCGGGGGCCAGCTCGAGGCCTTC  
TTCGACCTGGAGGGCTTCCAGCCGAGGCGAACGGCTCCAGCCGCGCGGTCCACGTGCAC  
CGCTTCGGGGACCTGAGCCAGGGCTGCGAGTCCACCGGGCCGACTACAACCCGCTGGGC  
GTGCCGCACCCGACACCCGGGCGACTTCGGCAACTTCGCCGTCGCGCCGGCCGCGTC  
TGGAAGTACCGCGCTGGCCTGGCCGCTCGCTCGCGGGCCCGCACTCCATCGTGGGCCG  
GCCGTGGTGGTCCACGCGGGCGAGGACGAC

>Chinese\_softshell\_turtle\_SOD3

ATGCTTCTGTTCTTTACCTGGCCATTATCCTGGCCCTCTCTGCATCTGGTATTGTGAGA  
GGAGACGAGGAGGCTGATTCCACAGAGACAGCCCACTTCAAGACATACGGAAAAAAGTG  
AATGATCTGTGGCAGAATTTACTCTACCCACAGTTAATCAGTAAGGAGACTGAGTGGACA  
GGTTATGCCACTTGTGAAGTGAAGCCCAGCTCCAACCTAGATGCTAACAAGCCACAGGTG  
ACAGGCCAAAGTTTTATTACAGGCAGTCCTATCCAAATGGAAAAGTAGAGTTATCTTTGAC  
TTGGATGGGTTTCCATTACACAGCAACCAGTCTGGCAGAGCTATTACATCCACGAGCTT  
GGAGACCTCAGCAAAGGCTGTGACTCTGCTGCAGGGCATTATAATCCTTTCAAGGTGAAC  
CACCTCACCACCCAGGGGATTTTGGCAACTTCTGTCTAAAGGCGGCAAAATTAGAAAA  
TACAAGGGAAATCTGCTTGCCCACTGTTTGGCCATATTCTATCATTGGGAGATCGATT  
GTGATCCACGAGCAGGAAGATGATATGGGCAAGGGTGGTAATAAAGCCAGTTTGGAGAAT  
GGGAATGCTGGCAGACGTCTAGCTTGTGTGTCATTGGGATATGCAACAAGAACTCATGG  
GAGAAAAATCTTCTGACATTACAGAGAGGAGGAAGAGGAGGATAACAAATGAGCACAAA  
ACAACCAGGCCTAAC

>Cow\_SOD3

ATGCTGGCGCTGCTCTGTGCCTCTGTGGTCTGGTGGCCTATGCCTCGGCCGACCAGATC  
CAGCAGCAGATGGGCTCCAACACGGAGGAGCAGATCCGCGACATGCACGCCAAGGTGACG  
GAGATCTGGCAGGAGATGATGCAGCGGCAGGCGGCGGCCATCGACCCGGACGCGGCGCTC  
CATGCCGTCTGCCGGTGTGCTGCGTCCGACGCTGGAGGCGGAGCAGCCCCGGGTGACG  
GGCCTCGTCTCTCCGGCAGCTCCGGCCTGGCGCCTGCTGGAGGCCTTCTTCCACCTT  
GAGGGCTTCCGAACGAGCCCAACGGCACAAACCGTGCCATCCACGTGCACCAGTTTGGG  
GACCTGAGCCAGGGCTGCGACTCCACGGGGCCGCACTACAACCCGATGTCGTGCGGCAC  
CCGAGCACCAGGGGCGACTTCGGCAACTTCGCCGTGCGCGATGGCCAGGTCTGGAAGTAC  
CGTCCGGCCTGGCTGCCTCGCTACCGGCCCGCATTGATCGCGGGCCGTGCCGTGGTG  
GTCCACGCGGGCGAGGACGACATGGGCCGCGGCGCAATCAGGCCAGTCTGGAGAACGGT  
AACGCCGGCCCGGCTTGCCTGCTGCGTGGTGGGTCTGTGTGGCCCCGGGCCCTGGGCA  
CGCCAAACGCAGGAGCACGCGGAGCGCAAGAAGCGGCGGCGGAGAGCGAGTGTAAAGCC  
GTC

>Dog\_SOD3

ATGGCCTGCCTTCCCTGCAGTGACAGTGACCGTGACCCGCTCCCGGGGGTGGCTTGCCC  
GCACGCCACAAACAGCCCAGCCTAAGGAGTCAGCCCGCATTCTGGCTGCTGCTCCCTA  
CTGCTCAGAAGGAAAGCTCTCTCGGAAGAGCTGGGAAGGTGCCCGCCCCGGCCATGCTG  
GCGCCCGCTGCTCTGCGCCACCTGCTGCTGGCGGCCCGCCTCGCGCGCTGGCCC  
GGCGCCCGCCCGACGAGCCCGAGCCCGAGCCCGAGCCCGAGCCCGAGCCCGGCCCGGC  
GCGGTGGCGGCGCAGCTCAGCGACATGCACGACAAAGTGACGGCCATCTGGCAGCAGCTG  
ACGAGCGCGCGGCCGAGCCGGGGGCCCGGGTCCGCGCTGCACGCCGCTGCCGGGTG  
CAGCCGTCCGCCTCGCTGGACCCCGCGCAGCCGCGCTGAGCGGCCTCGTGTGTTCCGC  
CAGCCCGCGCCCGGCGCCCCGCTCGAGGCCTTCTTCCACCTGGACGGCTTCCCGGCCGAG  
CGAACGGCTCCCGCCGCGCCATCCACGTGCACCGCTTCGGCGACCTGAGCCCGGGTGC  
GAGGCCGCGGGGCCGCACTACAACCCGCGCGCCGCGCCGACCCGCAACCACCCGGCGAC  
TTCGGCAACTTCGCGGTGCGCGACGGCCGCTCCGGAAGCACCGCGGCGGCCTGGCCGCC  
TCCCTCGCCGGCCCGCACTCCATCGTGGGCCGCGCCGCTCGTGGTGCACGCGGGCGAGGAC  
GACCTGGGCCGCGGCGGCGACCCCGCCAGCCTGGACCAGGCAACGCGGGCCGCGCCTG  
GCCTGCTGCGTCGTGCGCTGTGCGGGCCGCTGCCCTGGGCGCGCGCGGCGGGAGCAC  
GCGGAGCGCAGGAAGCGGGCGGCGGACAGCGACTGCCAGGCGGCC

>Elephant\_SOD3

ATGCTGGCGCTGCTGTGTTCTTCTGCTCTGGCGCCCGCGCCTTACCGATATGGAT  
ACCGACACGGCGGAGCCCGTTCCAACACGGCAGAGCAAATCCGCGACATGCACGTCAAG  
GTGACGGAGATTTGGCAGGCGCTCACGCACCGGGGGGCGAGGGACGGCGGGCCGGGCGCC  
GACCTATACACCGCATGCAGCGTGCAGCCATCCGCCTCGATAGGCGCTGCGCAGCCGCGG  
GTACTGGCCTCGTCTTCCGGCAGCTGGCGCCCGGCGCCAAGCTCGAGGCCTTCTG  
GACCTGGAAGGCTTACCGCAGAGCACAACGGCTCCGCCCCGCGCCATCCACGTGCACCAG  
TTCGGGGACGTGAGCCAGGGCTGCGAGGCCACTGGGCCCACTACAACCCGCTGGGCGTG  
CCGCACCCGACGACCCGGGCGACTTCGGCAACTTCTGGGTCCGCGACGGTAGCCTCTGG  
AAGTACCGCACGGGCTCAACGCCTCGCTCGTCCGCCCCATTGATCGTGGGCGCGCA  
GTCGTGGTGCACGCGGGCCAGGATGACCTGGGCCGCGGCGGCGACCAGGCCAGCGTGGAG  
AACGGCAACGCGGGCCCCGGCTGGCCTGCTGCGTGGTGGGCGTGTGCGGGCCTGAGCCG  
TGGGCGCGCCAGGCTCAGAAACATGCTGAGCGCAAGAAGCGGTGGCGCGAGAACGAGTGC  
AAGGCTGCC

>tropical\_clawed\_frog\_SOD3

ATGAACAATCTGTTGTA CTGGCCGTGGCTCTACCGTTTGTGAACTGCTCAGCGCTGGA  
GCAGAAGTGGTGA AACCGGTGGAAGAAGAACTTCTGACAGACACAAACAAAAAAGTCAAC  
GAGCTGTGGATAAACCTTCTCAATATGAAGCCGACGGATAATGACGGGATTGCCTACGCA  
ACCTGTAGTCTAAGTCTAGTTCCAACTGGAACCATCAGAGGTAAAAGTGACAGGACTT  
GTGCTGTTTAAGCAGGTTTTCTAGCGGCACGCTCGAAGCCATTTTTGATTTAGAAGGG  
TTTCCA ACTGATGCCAATCAGTCAGCAAGAGCTATTCACATCCACACATACGGCGATCTA  
ACCAATGGATGCGACTCTGCCGGTGGCCACTATAACCCTATGTCTGTAGACCACCCACAG  
CATCCTGGTGATTTTGCAATTTCCGTGTCAGGGATGGAAGATCCAAAAATTTTTGCA  
AATCTTGATGCCACTCTCTTTGGTCCATTCTCTGTCATCGGCAGATCAGTTGTGGTCCAC  
AAACAAGCAGATGATCTTGGCAAAGGGAACAATCAGGCCAGTTTGGAGAATGGAATGCA  
GGGAAACGCCTGGCTTGTTCATTATTGGATCCAGCAGTAAAAATAACTGGGAAAAGTAT  
GCCCAAGACAGTGCAGCACCAAGGAACCTCAGGTTTTCCAGACGGGTAAAAAATGGT

>Fruitfly\_SOD3

ATGATGCAATATCTTGTGTTAGCCTGGCACTCTGTGCCACAATTTGCTCTGCTGCGCAG  
ACGCGCAATATGCCATTCAAGCCATTGCCTATCTGATTGGACCCGTGCAATCGGATAAT  
ACCCAGGTCAAGGGCAACGTGACCTTTACGCAGAACGACTGTGGCCAGAATGTCCATGTG  
CGCGTCCAGCTGGAGGGATTGAAGGAGGGCAAGCACGGCTTCCACATTCACGAGAAGGGA  
GATCTGACCAATGGATGCATCAGCATGGGTGCTCACTATAACCCCGATAAGGTTGATCAC  
GGTGGCCCCGATCACGAGGTGCGTCATGTTGGCGATCTGGGCAACCTGGAGGCCAACTCC  
ACGGGCATTATCGACGTTACATACACGGATCAGGTGATCACCTTAACTGGCAAGCTGGGG  
ATCATTGGCAGGGGAGTTGTTGTCCAGAAATTGGAGGATGATCTCGGTCTGGGCAACCAC  
ACGGATTCCAAGAAGACCGGCAATGCAGGCGGCCGATTGCCTGTGGTGTATTGGCATC  
AATGGCCCATCTGTACCTGCACCTGCACCACCAACACCACGCCATCAGCCACTGTACTAT  
GTGCCCCATGGGGAGCCACAAGATCATGTTGTCTATCCACTCCAGCACTATCCTTTGCCA  
TACCCACACCCATATCCATATCCGCACCCATACCCCTATCCGTATCCGTTGTGCGACCAA  
TTGTATCTG

>Anole\_lizard\_SOD3

ATGTTTCTGCTGCTGTTTCTCATCCCTGGCTTGATTCTTTGTGAATGCAACGTCTCCACA  
GGAGAAGATGTCCAGCCTACCGCAGTGAGCCACTTCAAGACATTAGAAAAAAGTCAAC  
GAGCTTTGGTTCGAGTTTGCTCTACCCGCACCTCTATGAGGAGGTA CTTCATCAAACGGG  
ACTGCTTATGCTGTTTGTACAGTGAAGCCCAGCACCAA ACTGGATGCAGGAATGCCGCAA  
GTGACAGGGCAAGTTCTGTTTCAGGCAAACCTACCCCTATGGAAAGCTGGAGAGTATATTC  
TATTTGGATGGGTTTTCTACAGGTGCCAACTTGCTGGGAGAGCAATTCACATCCACCAG  
TATGGAGACCTCAGCGACAGCTGCGACTCAGCCGGGGGACTACAATCCTTTTAAAGTC  
AATCACCTTCTCATCCTGGGGACTTTGGCAA CTCTACTCTAAAGAAGGCAAAATTATA  
AAATATAAGGCCAACCTCGTGGCCACTTTTTCGGTCCGTACACCATTATGGGAAGGTCT  
GTTGTGGTCCATGTACAGGAAGATGACCTGGGGAAAGGGAACAACAAGCCAGCTTGGAG  
AACGGAAATGCCGGCAAACGCTTAGCTTGCTGTATTATTGGAACATGCAACAAAAACCG  
TGGGTGAAGCGTTTTCTGAGATTATGGAGAAGAGGAAGAAAAGGCTCACGAGACGTGCA  
CAGAACAGCCCAGCC

>Human\_SOD3

ATGCTGGCGCTACTGTGTTCTGCCTGCTCCTGGCAGCCGGTGCCTCGGACGCCTGGACG



GGCGAGGACTCGGCGGAGCCAACTCTGACTCGGCGGAGTGGATCCGAGACATGTACGCC  
AAGGTCACGGAGATCTGGCAGGAGGTCATGCAGCGGCGGGACGACGACGGCGCGCTCCAC  
GCCGCTGCCAGGTGCAGCCGTGGCCACGCTGGACGCCGCGCAGCCCCGGGTGACCGGC  
GTCGTCTCTCCGGCAGCTTGCGCCCGCGCAAGCTCGACGCCTTCTCGCCCTGGAG  
GGCTTCCCGACCGAGCCGAACAGCTCCAGCCGCGCCATCCACGTGCACCAGTTCGGGGAC  
CTGAGCCAGGGCTGCGAGTCCACCGGGCCCCACTACAACCCGCTGGCCGTGCCGCACCCG  
CAGCACCCGGGCGACTTCGGCAACTTCGCGGTCCGCGACGGCAGCCTCTGGAGGTACCGC  
GCCGGCTGGCCGCTCGCTCGCGGGCCCCGACTCCATCGTGGGCCGGGCCGTGGTCTGTC  
CACGCTGGCGAGGACGACCTGGGCCGCGCGGAACCAAGGCCAGCGTGGAGAACGGGAAC  
GCGGGCCGCGGGCTGGCCTGCTGCGTGGTGGGCGTGTGCGGGCCCGGGCTCTGGGAGCGC  
CAGGCGCGGGAGCACTCAGAGCGCAAGAAGCGGCGGCGGAGAGCGAGTGCAAGGCCGCC

>Macaque\_SOD3

ATGCTGGCGCTGCTGTGTTCTGCCTGCTTCTGGCAGCCGGTGCCTCGGACGCCTGGACG  
GGCAAGGACTCAGCGGAGCCAACTCTGACTTGGCAGAGTCGATCCGAGACATGCACGCC  
AAGATCACGGAGATCTGGCAGGAGCTCACGCAGCGGCGGGACGGCGACGGCGCACTCCAC  
GCCGCTGCCAGGTGCAGCCGTGGCCACGCTGGACGCCGCGCAGCCCCGGGTGACCGGA  
GTCGTCTCTCCGGCAGCTCGCGCCCCGCGCAAGCTCGAGGCCTTCTCGCCCTGGAG  
GGCTTCCCGACTCAGCCGAACAACCTCAGCCGCGCCATCCACGTGCACCAGTTCGGGGAC  
CTGAGCCAGGGCTGCGAGTCCACCGGGCCCCACTACAACCCGCTGGCCGTGCCGCACCCG  
CGGCACCCGGGCGACTTCGGCAACTTCGCGGTGCGCGACGGCAGCCTCTGGAAGTACCGC  
GCCGGCTGGCCGCTCACTCGCGGGCCCCGACTCAATCGTGGGCCGGGCCGTGGTCTGTC  
CACGCTGGCGAGGACGACCTGGGCCGCGCGGAACCAAGGCCAGCGTGGAGAACGGGAAC  
GCGGGCCGCGGGCTGGCCTGCTGCGTGGTGGGCGTGTGCGGGCCCGGGCTCTGGGAGCGC  
CAGGCGCGGGAGCACTCAGAGCGCAAGAAGCGGCGGCGGAAAGCGAGTGCAAGGCCGTC

>Mouse\_SOD3

ATGTTGGCCTTCTTGTCTACGGCTTGCTACTGGCGGCCTGTGGCTCTGTCACCATGTCA  
AATCCAGGGGAGTCCAGCTTGCACCTAGCAGACAGGCTTGACCCGTTGAGAAGATAGAC  
AGGCTTGACCTGGTTGAGAAGATAGGCGACACGCATGCCAAAGTGCTGGAGATCTGGATG  
GAGCTAGGACGACGAAGGGAGGTGGATGCTGCCGAGATGCATGCAATCTGCAGGGTACAA  
CCATCAGCCACGCTGCCACCGATCAGCCGAGATCACCGGCTTGGTTCTTCCGGCAG  
CTGGGGCCGGGCTCCAGGCTTGAGGCTATTTAGTCTGGAGGGCTTCCAGCTGAGCAG  
AACGCCTCAACCGTGCCATCCACGTGCATGAGTTCGGGGACCTGAGCCAGGGCTGCGAT  
TCCACCGGGCCGACTACAACCCGATGGAGGTGCCGCACCCTCAGCACCCGGGCGACTTT  
GGCAACTTCGTGGTGCGAACGGCCAGCTCTGGAGGCATCGCTCGGCCTGACCGCTCG  
CTGGCCGGACCGCACGCCATCTTGGGCCGCTCTGTGGTGGTCCACGCCGGCGAGGACGAC  
CTGGGTAAAGGTGGCAACCAAGGCCAGCCTGCAGAACGGCAATGCAGGTGCGCCGGCTCGCC  
TGCTGCGTGGTAGGCACCAGCAGCTCCGCCGCTGGGAGAGCCAGACAAAGGAGCGCAAG  
AAGCGGCGGGGAGAGCGAGTGCAAGACCACT

>Naked\_mole\_rat\_SOD3

ATGCTGGCTTGTGTGGCTGCCTGCTTCTGGCAGCCCCAGCCGTGCACACCCTGAGC  
GTCACGGACCTGGCGAAGCCCAGCCCCGAGCTGATGGAGCAGATCCACGACATGCACACC  
AAGGTGACAGACATCTGGCAGGAGCTGACGCAGTGGCGGGAGGCCGCCGGCGGGCCAGAC  
GTGGGGCTCCACGAGTGTGCCACATGCAGCCATCCGCCACTCTGGACGCCGAGCAGCCC  
CGCGTGAGCGGCCTGGTCTCTCCGGCAGCCCCGGGCCGGGGCCAGGCTCGAAGCCTTC

TTCGACCTGGAGGGCTTCCCCGAGGAGGCCAACAGCTCCAAACGCGCCATCCACGTGCAC  
CGGTTTCGGCGACTGAGCCAGGGCTGCGACTCCACCGGGCCCCACTACAACCCGCTGTCC  
GTGCCGACCCGACGACCCCTGGCGACTTCGGCAACTTCGTCTGTGCGGACGGCCGCTC  
TGGAAGTACCAGGCCGGCCTCCCCGCTCGCTGGCCGGCCCTACTCCATCGTGGGCCG  
GCCGTGGTGGTCCACGCCGGCGAGGACGACCTCGGCCGCGGCGACACCCCGCCAGCGTG  
GAGAACGGCAACGCGGGGCCAGGCTCGCTGCTGCGTGGTGGGCGCGGGGGCCCCGAG  
GCCTGGGCGCGTCAGGCGCGGAGCACGCGGAGCGCAAGAAGAGGCGGCGGACAGCGGG  
CGCAAGACAGCA

>Orangutan\_SOD3

ATGCTGGCGCTACTGTGTTCTGCCTGCTCCTGGCAGCCGGTGCCTCGGACGCCTGGACG  
GGCGAGGACTCGGTGGAGCCCAACTCTGACTCGGCGGAGTGATCCAAGACATGTACGCC  
AAGGTCACGGAGATCTGGCAGGAGGTCATGCAGCGGCGGGACGACGACGGCGGCTCCAC  
GCCGCTGCCAGGTACAGCCGTGGCCACGCTGGACGCCACGCAGCCCCGGGTGACCGGC  
GTCGTCTTCCGGCAGCTCGCGCCCCGCGCAAGCTCGACGCCTTCTTCGCCCTGGAG  
GGCTTCCCGACCGAGCCGAACAGCTCCAGCCGCGCCATCCACGTGCACCAGTTCGGGGAC  
CTGAGCCAGGGCTGCGAGTCCACCGGGCCCCACTACAACCCGCTGGCCGTGCCGACCCG  
CGGCACCCGGGAGACTTCGGCAACTTCGCGGTGCGCGACGGCAGCCTCTGGAAGTACCGC  
GCCGGCTGGCCGCTCGCTCGCGGGCCCCGACTCCATCGTGGGCCGGGCCGTGGTCTGTC  
CACGCTGGCGAGGACGACCTGGGCCGCGGCGGAACCAGGCCAGCGTGGAGAACGGGAAC  
GCGGGCCGCGGGCTGGCCGTGCTGCGTGGTGGGCGTGTGCGGGCCCCGGGCTCTGGGAGCGC  
CAGGCGCGGGAGCACTCAGAGCGCAAGAAGCGGCGGCGGAGAGCGAGTGCAAGGCCGCC

>Western\_painted\_turtle\_SOD3

ATGTTTCTGTTCTTTACCTGGTCATCAACCTGGGCCTCTCTGCATCTGGTGTGAGG  
GGAGAAGGTGAGGCTGATTCCAATGGAGACAGCCCACTTCAAGACATACAGAAAAAAGTG  
AATGACCTGTGGCAGAATTTACTCTACCCACAGTTCATCAATGAGACGACTAACCGGATC  
GGTTATGCCACTTGTGAAGTGAAGCCAGCTCCAATCTAGATGCTGACAAGCCACAGGTG  
ACAGGCCAAGTCTTGTTCAGACAGTCTACCCAAATGGAAAAGTAGAGGCTCTCTTTGAC  
TTGAATGGGTTTCCATCAGGCAGCAATCAGTCTGGCAGAGCTATTACATCCATAAGCTC  
GGAGACCTCAGCAACAGCTGTGACTCTACTGGGGGGCACTATAACCCTTTCAACGTGAAC  
CACCTCGCCATCCAGGGGATTTTGGCAACTTCTACTCTAAAGAAGGCAAAATTAGAAAA  
TACAAGCCAAATCTGCTCGCCACTCTGTTTGGCCCTACTCCATCATGGGGAGATCCATT  
GTGATCCATGAGCAGGAAGATGATATGGCAAGGGTAACAATAAAGCCAGTTTGGAGAAT  
GGAAATGCTGGCAGACGCTAGCTTGTGTCATTGGGACATGCAACAAGAAGTATGG  
GAGCAAAAGTTTCTGACATTACAGAGAGGAGGAAGAAGAGGATCACAAATGAGCACAAA  
ACAACCAGGCCTAAC

>Panda\_SOD3

ATGCTGGCCCCGGCGCTGCTGTGTGTCTACGTGCTGCTGGTGGCCCCCGCTCGCGCGCCGGGCCGCC  
CCAGCCCGGAGGAGCCCGGCTCCAGCACGGAGGCGCAGATCCGCGACATGCACGCGAAAGTGACGGCCA  
T  
CTGGCAGGAGCTGACGCAGCGACAGGCGGCGGCCGACGGTNNNNNNNNNNNNNNNNNNNNNNNN  
NNNNG  
TCGGCCACGCTGGACACCGCGCAGCCCCGGGTACGCGCCTCGTGCTTCCGGCAGCTGGCGCCCCGGCG  
CCCGGCTCGAGGCTTCTTCGACCTGGAGGGCTTCCCGGCCGAGGCCAACAGCTCCAGCCGCGCCATCCA  
CGTGACCAAGTTCCGGGACCTGAGCCAGGGCTGCGAGTCCACCGGCGGCGCACTACAACCCGCTGGCCGTG

CCGCACCCGCAGCAC

>Pig\_SOD3

ATGCTGACGCTGCTCTGTGCTTACCTGCTCCTGGCGCCCGGCCTCCGACGCCTTGACC  
CACGTGGACGTGGAGCGGCCAGGCTCCACATGGAGGAGCAGATCCGGGACATGCAGGCC  
AAAGTGACGGAGATCTGGCAGGAGTTGACGCAGCAGCGGGCGGGCGGGCGGCCAGGAG  
GCCGCGCTCCACGCCACCTGCTCGATGCAGCCTTCGGTCTTGCTGGACGCGGCGCAGCCC  
CAGGTGACCGGCCCTTGTGCTCTCCGGCAGCTCCGGCCCGGCCTGCTCGAGGCCTTC  
TTCCACCTGAAGGGCTTCCCGGCCGAGCCCAACAGCACCCAGCCGCGCCATCCACGTGCAC  
CAGTTCGGGGACCTGAGCCAGGGCTGCGACTCCACAGGGCCGACTACAACCCGCTGGAT  
GTGCCACATCCGCAGCACCCGGGAGACTTCGGCAACTTCGCCGTGCGTGACGGCCAGATC  
TGGAGGTACCGCTCCAGTCCGGGCGCCTCGCTGTTCCGGCCCGCACTCGATCGCGGACCGC  
GCGGTGGTTGTCCACGTGGGCGAGGACGACATGGGCCGCGGAACCAGGCCAGCCTGGAG  
AACGGCAACGCCGGCCGCCCTGGCATGCTGCGTGGTGGCCCTGTGCGGCCCGGGCC  
TGGGCGCCCCAGGCGCAGGAGCACGCCGATCACATGAAGCGGCGGCGCGCAAGCGAGTGC  
AAGGCCAGC

>Platypus\_SOD3

ATGTCCCCACCTGGGCCCCGCCCTCATCCTGGCCACCTGTGCCTTCTGGGCCGCCGA  
GGGCAGGGCGGAACGGGGAGGACCCGAAACCAGGTGAACGCCATCTACCAGAAGGTG  
ACGGACCTGTGGAACAAGCTGTACATGGTGAAGCCGGTGACGGCCAACGGCAGCGACGAG  
GATCCGGTGTACGCGGCTTGCAGGTCAAACCGTCTCCATTCTGGAGGCCGACCAGCCG  
CGGGTCAACGGCCGGGTGCTCTTCAGGCAACAGTACCCGGACGGAAGGCTGGAGGCCATC  
TTCGACCTGAACGGCTTCCCCACCGTGGGCAACGGGACCGGCCGGCCATCCACGTCCAC  
AAGTTTGGGGATATGAGCAACGGTTGTGATGGGGCTTCTAGTCACTACAACCCCTTCTCC  
AAACCACACCCTCAGCACCCGGGGACTTCGGGAACTTCTGCCTAGGGAAGGCAAGATC  
AAGCGTTACCGGACCAACCTGCTGGCCCTCGCTCTTCGGCCATACTCCATCCTGGGCCGC  
TCCATCGTGGTGACAGCGGGATGATGACCTCGGCAAGGGTGGGAACAAGGGCAGCCAG  
GAGCACGGGAACGCCGGAAGCGGCTGGCCTGTTGCGTCATCGGGATCTGCGGCCGGGAG  
TCGTGGGATAAAAAGGCCCTCGAGATCAACGAGCGGAGGAAGAAGAGGCCGGGAGAGCGAG  
TGCAAGACGGCC

>Rabbit\_SOD3

ATGCTGGCGTTGGTGTGCTCCTGCCTGCTCCTGGCGGCCCTCCAGCGGACACCTGGAGC  
GGCCCCGCCGAGTGGAGCTCGGCTCAGACACGGTGGAGCAGATCCGTGACACGCACGCC  
AAAGTCACGGAGATCTGGCAGGCGCTCACGCAGCAGCGGGCAGCGCAAGGCGAGCCGGCC  
GGGGCGCTCCACGCCGTCTGCCGGGTGCAGCCGTGGCCACGCTTGACGCCGCGCAGCCG  
CGAGTCAGCGGCTTGGTAGTCTTCCGGCAGCTTGGGCCGGTGCCAGCTCGAAGCCTTC  
TTCGACTTGGAGGGCTTCCCGGTCGAGGCCAACCTCTCCAGCCGCGCCATCCACGTGCAC  
CAGTTCGGGGACCTGAGCCAGGGCTGCGACTCCACCGGCGCCACTACAACCCGCTGGCC  
GTGCAGCACCCGACGACCCGGGAGACTTCGGGAACTTCGCCGTGCGCGACGGCCGCTC  
TGGAAGTACCGCTCGGGCCTGGCCGCTCGCTCGCAGGGCCGCACTCGATCGTGGGCCGC  
GCCGTGGTGGTGACGCCGGCGAGGACGACCTGGGCCGCGGCGGCAACGCGGCCAGCGTG  
GAGAACGGCAACGCGGGCCCCAGGCTGGCCTGTTGCGTGGTGGGCGCCAGCGGGCCCCGG  
CCCTGGGCGCGCCAGGCGCAGGAGCACGCAGAGCGCAAGAAGCGACGGCGCGAAAGCGAG  
TGCAAGGCCGCC

>Tetraodon\_SOD3

ATGCGTCTGCACGGGTGGGTGATCGCGTCGGCAGTGCTGCTGCTTCTGCTGGCCGGTTGT  
CAAGATTGCGGCTCAGCTCACGGTGACCCTGCAGCTCCGCCGGAGGCCTCTCAGAACAAT  
GGCAGCCTGTATGCGGCCTGCAACATGAGACCCAGCGCCTTGCTGCCAGAGGACCTGCC  
AAAGTGACGGTCACGTGCTGTTCAAGCAGGACCACCCTCAGGGAGGACTCTCGGCCCTC  
CTTCAGCTTGGCGGCTTCTCAGCGACGGCGAGCCACGGCCGTCCACATCCATCAGTAC  
GGGGACCTGAGCCAGGGGTGCGGCTCCACCGGTGGGCACTACAACCCACACGGCAAAAAAC  
CACCCCAACCACCCCGAGACTTTGGTAACTTTGAGCCTCAGGAGGGGAAGGTCGACGCC  
GCGGTAGAGTCAAACGCCACGCTCTTTGGAGCGACGTCTGTGATCGGAAGGGCAGTGGTG  
GTCCACGAGAAGAGAGATGACCTGGGCCAGGGTGGAGACGCCGGGAGCCTCCTGCACGGA  
AACGCAGGACGGAGGCTTGCTGCTGCGTTATTGGAATTTCTCTCCGATCTGTGGAAC  
ACCTCCAAGGAGTTTACAGAAAGGGGG

>Tilapia\_SOD3

ATGCATCGATACGCGACAGTGGGTATACTGGAAGCTGCTTTGTTGGTTTTGCTGGCAGGC  
TGTCACAATGTGTCTTAGCATCCAGCGACACATTGGCTCCAGAGGTCTTGAGAACAAC  
GGCACCCCTGTATGCAGTCTGCAAGGTGAGACCCAGCACCTCTCTCCCGAGGACCTGCC  
AAAGTGTATGGCCATGTGCTGTTCAAGCAGGATCATCCTCAGGAGAAAAGTCAAGGTCCTC  
CTCCGGTTTAGTGGCTTCCCCAGGGATGGCAGTCCGGAGCCCAGAGCAGTGCACATCCAT  
CAATATGGAGACCTGAGCCGGGGATGTGACTCCACCGGTGGCCACTACAATCCATATGGT  
GTAAATCACCTAACCCCTGGAGACTTTGGAACTTTGAGCCTCAGCAAGGGAAGATT  
AATACAATGCTAGAATCTGATGCAACACTGTTTGGAAAGCCTGTCTGTGTTTGGGAGAGCA  
GTGGTAATTCATGAAAAGATAGACGACTTAGGGCGCGGTGGAGACGCTGGGAGCCTGCTG  
CATGGAAACGCAGGCCGAAGGCTCGCATGCTGCATTATTGGGGTTTCGTCCCCAATCTC  
TGGAATATGAACTTAAAGCAGTACTCCAGGCAGCTGAGGAGG

>Worm\_SOD3

ATGCTGCAATCTACTGCTCGCACTGCTTCAAAGCTTGTTCAACCGGTTGCGGGAGTTCTC  
GCCGTCCGCTCCAAGCACACTCTCCAGATCTCCATTGACTATGCAGATTTGGAACCT  
GTAATCAGCCATGAAATCATGCAGCTTATCATCAAAGCATCATGCCACCTACGTGAAC  
AATCTCAATCAGATCGAGGAGAAACTTACGAGGCTGTTTCGAAAGGGAATCTAAAAGAA  
GCAATTGCTCTCAACCAGCGCTGAAATCAATGGTGGTGGACACATCAATCATTCTATC  
TTCTGGACCAACTTGCTAAGGATGGTGGAGAACCTTCAAAGGAGCTGATGGACACTATT  
AAGCGGACTTCGGTTCCTGGATAACTTGCAAAAACGTCTTCTGACATCACTATTGCG  
GTTCAAGGCTCTGGCTGGGGATGGTTGGGATATTGCAAGAAAGACAAAATCTTGAAGATC  
GCCACCTGTGCAAACCAGGATCCTTTGGAAGGAATGGTCCCACTTTTGGAAATTGACGTT  
TGGGAGCACGCTACTACTTGCAGTACAAAATGTCCGCCAGACTATGTCCATGCTATT  
TGGAAGATTGCCAACTGGAAGAATATCAGCGAGAGATTTGCCAATGCTCGACAA

>Zebrafish\_SOD3

ATGATACGCTTCAACATTTTACCCCTTCTGGCATTCTGCTCAGTTGCCATGTGCTCTTC  
TGTGGATCAGGCTCAGGTCTGGCATATGCTTCAAACAGTGATTCCCTCAGGCCGTATGC  
AGAATGCAGCCTAACACTCGACTAGAGCCTGGCATGCCTCGTGTGTATGGTCACATTTTA  
TTCAGACAGTCTGGCCCAAAGGAAAAGCTGAGCGTGACTTTCAGGCTCTATGGTCTCCCT  
GCGGACAGTCAGCAGCCAGAGCCATGCACATTCATGAGTATGGAGACTTAAGCAGGGGC  
TGCGACTCTACAGGTGGGCATTACAATCCCCTCAACGTCAACCATCCACAACATCCAGGG  
GACTTTGGCAACTTTGTGCCGTTAACAAGAAGATTCGGCAGTCACTGGAATCCCCTGCA  
ACTCTCTTTGGAAACTTTCAATAGTCGGCCGGTCTGTTGTCATTCATGAGGGAAAGGAT

GATTTGGGCAGAGGTGGGAATGTGGGAAGCTTGCTGAATGGCAACGCTGGAGGGCGACTG  
GCATGCTGTGTTATTGGACTGAGAAACCCCCAAAATTA

>Horse\_SOD3

ATGACCTTCCTCGTCACAGTGACCACTCCTCTGGGCTGGCTTCTGCAGGCCACAAAC  
AGCCCAGTCTCAGGAGCCAGCCTGCGTTCCTGCCTCCAGCTTGGGCGCTGCTCGCACTTC  
CCAGGAAGGAAAGCTCTTTGAAAGGGCTGGAAAGGTGCCTGACTCCCGCCATGTTGGCG  
CTGCTGTGTGCCTTCTGCTCCTGGCGGCCGGCGCCTCGGACCCTCGGGCGGAGCCAGC  
TCTAATACGACGGAGCAGATCCGCGACATGCACGCCAAAGTGACGGAGATCTGGCAGGAG  
CTGCTGCAGCGGCGGCAGGGGGCAGCGGCCGGGATGCTGCGCTCCACGCTGCCTGCCAC  
GTGCAGCCGTCGGCCACGCTGGACGCCGCGCAGCCCCGAGTGACCGGCCTCGTGTCTTCC  
GGCAGCTCGTGCCCGGCCAAGCTGGAGGCCTTCTTTGACCTGGAGGGCTTCCCGGCCG  
AGCCAACGCTCCAGCCGCGCCATCCACGTGCAC

>Dolphin\_SOD3

ATGCTGGCGCTGCTCTGTGCCTACCTGCTCCTGACATCCCGCACCTCGGAAGTCTCCGCC  
GACCCGGACATGGAGCAGCCCGGCTCCCGCATTAGGAGCAGATCCGCGACATACACGCC  
AAAGTGACGGAGATCTGGCGGCAGCTGACGCAGTGGTGGGCGGCGGGCGGAAGCCAGGAC  
GCCGCGCTCCACGCCACCTGCCCGTGCTGCCGTCGGCCACGCTGGACGCGGCGCAGCCA  
CGGGTGAGCGGCGTCTGTCTTCCGGCAGCTGCGGCCCGGCGCCTTGCTCGAGGCCTTC  
TTCCACCTGGAGGGGTTCCCGGCCGAGCCCAACGGCACCAGCCGCGCCATCCACGTGCAC  
CAGTTCGGGGACCTGAGCCAGGGCTGCGACTCCACCGGCACGCACTACAACCCGCTGGGC  
GTGCCGATCCGACAGCCCGGGCGACTTCGGCAACTTCGTGGTGCAGGACGGCCAAATC  
TGGAAGTACCGCTCCGGCCTGGCCGCTCGCTTTCGGCCCGCACTCGATCGCGGGCCGC  
GCCGTAGTGATCCAGAGGGCGAGGATGACCTGGGCCGCGGTGGTAACCAGGCCAGCCTG  
GAGAACGGCAACGCGGGCCCGGCTCGCCTGCTGCGTGGTGGCCTGTGCGGGCCGGGG  
CCCTGGGCGCGCCAGGCACAGGAGCACGCGGAGCGCAAGAAGCGGCGGCGAGAGAGCGAG  
TGCAAGGCCAGC

>Opossum\_SOD3

ATGCTTCCAGTCTGAGTGCCACCATCATCTGTCTGCCTTTGTGCTCTGTGCCACAGTG  
GAACTAAATGGGGAGCAGATGAATGACATCCAGAAAAAGTCAGTGACCTCTGGCATAGG  
CTCATCTACCTGAAGCCAGTCACTTCAGGCAGTGATGATCATATTGTCTATGCCACCTGC  
CAGGTACAGCCTTCGTCTACTTTGGAGGCCAATAAACCCAGGTGACAGGGCAAGTTCTA  
TTTAAACAGCTCTACCCAGATGGGAAGATGGAAGTCTTCTTTGATCTGCAAGGGTTTCCA  
GCAGATACCAGGAATGCCACTGGCCGAGCTATCCACATTCACAACTTTGGAGATCTCAGC  
AATGGCTGTGATAGCACCTCCAGCCACTATAACCCTCATGGGGTAGCCACCCCTCCAC  
CCAGGGGACTTCGGGAACTTCCTTGTGAAGGATGGAAAGATCAGGAAGTCTCGATCCAAC  
GTTTCTGCTTCCCTATTTGGGCCCACTCTGTTCTTGAAGGGCCATTGTAGTTCATGAG  
CAAGAAGATGACCTTGGCAAAGGTGGAAACAAAGGCAGCTTGAACATGGCAATGCTGGG  
AAGCGCTGGCCTGCTGTGTCATTGGCATCTGTGGACCAGAGCTCTGGAATAAGGCAGCA  
ATGGACAATGCATCGAGGAAAAAGAAGAGGAGAGAAAGTGAATGCAAGACTGCC

>Chicken\_SOD3

ATGCTTCTGCTTCTTTCTCTGGTCACTGGGCTGGCCCTGTCTGCCTCTGATGTCGTGACA  
GAAACAGGAGCCGATCCAAGCAGCGGTTACTTCATGACATACAGAGAAAAGTGAATGAC  
CTCTGGCAGAGCTTGCTCTATCCAGTGATGGCTGATAATGAGACTGATGGGCTGACCTAC  
GCCACCTGTGAAGTGAAGCCAGCTCCAAAATAGATGCTGACAAGCCACAAGTGACTGGA

CAAGTCTTATTCAGACAGCATTACTCACAAAGGAAAATTAGAAGCCATTTTTCACTTGGAT  
GGGTTTCTCTGGATAACAACCAGTCTGGCAGGGCCATACACATCCATGAGCTCGGAGAT  
CTCAGCGACGGCTGCAACTCCGCGGGAGGACACTACAACCCCTTTGGAGTGAACCACCCC  
CGCCACCCAGGGGACTTCGGCAACTTTTCTCTAAAGATGGCAAGATCAGAAAATACAAA  
CCCAACCTCTTCGCCACAATGTTTGGTCCGTACTIONCCTGGGCAGATCCGTTGTGATC  
CATGAGCAGGAAGATGACATGGGCAAGGGCAATAACAAGGCCAGTCTGGAAAATGGAAAT  
GCTGGCAAACGTCTGGCGTGCTGCGTGATTGGGATCTGCAACAAGAACTTGTGGGAGGAG  
AAACAGTCTGAGGCTATGGACAGGAAGAAAAGATGGCGCCGAACCAGGCTCAGC

>Turkey\_SOD3

ATGCTTCTGCTTCTTTCTCTGGTCACTGGACTGGCCCTGTCTGCCGCTGGTGTGCTGACA  
GAAACAGGAGCCGATCCAAGCTGTGCATCACTTCATGATGTACAGAGAAAAGTGAATGAC  
CTCTGGCAGAGCTTGCTCTATCCAGTGATGGCTGATAATGAGACTGATGGGCTGACCTAC  
GCCACCTGTGAAATGAAGCCCAGCTCCAAAATAGGTGCTGACAAGCCACAAGTGACTGGA  
CAAGTCTTATTCAGACAGCATTACTCACAAAGGAAGATTAGAAGCCATTTTTCACTTGGAT  
GGGTTTCCACTGGATAACAACCAGTCTGGCAGAGCTATACACATCCACGAGCTCGGAGAT  
CTCAGCAACGGCTGTGACTCCACGGGAGGACACTACAACCCCTTCAGAGTGAACCACCCC  
CGCCACCCGGGGGACTTTGGCAACTTTTCTCTAAAGATGGCAAAAATCAGAAAATACAAA  
TCCAATCTCTTCGCCACAATGTTTGGTCCGTACTIONCCTGGGCAGAGCCATTGTGATC  
CACGAGCAGGAAGATGACATGGGCAAGGGCAATAACAAGGCCAGTCTGGAAAATGGAAAT  
GCTGGCAAACGTCTGGCGTGCTGCGTGATTGGGATCTGCAACAAGAACTTGTGGGAGGAG  
AAACAGTTTGTAGGCTACGGACAAGAAGAAGAGATGGCTCCGAACCAGGCTCAGC

>Duck\_SOD3

ATGAAAACCTTTCCCTGTCCCTGCTGCCTCCAGCCCTCCCCTGTGCTGCGTTTCCAAGCT  
CTTACACAAGCACACCCAGCCTCCAGCAGCTCGGCGCTGAGGGCTGGCCGCACTCTGCT  
TGTTGGGAGCAGAGGCGAGGAGCTGCCACCGAGGCATCCTGCGGTGATTGGGAGAGGCTC  
AGCGTGGCCAGGATGCTTCTGCTGCTTTCTCTGCTCGCGGGACTCGCCCTGCCCGCCCT  
GGCATCGCGCGGAAGAAGAAACCGAGCCAAGCAGAGAGACCCTTCAAGACATACAGAAA  
AAAGTGAACGACCTCTGGCAGAATTTGCTCTACCCGCTAACGGCCGGTAACGAGACCGGC  
GGGATGACTTACGCCGCTTGTGAGATGCAGCCCAGCCCCAACTAGACGCTGAGAAGCCG  
CAGGTGACCGGCCAGGTCTGTTCCGGCAGCATTACCCGAGGGAAGGCTGGAAGCCATT  
TTTCACTTGGAGGGCTTTCCGCTGAACGACGACCAGCCCGCAGAGCGATCCACATCCAC  
GAGCTGGGGGACCTCAGCAGCGGCTGCGATTCCACCGGAGGCCACTACAACCCCTTCCGC  
GTCAACCACCCCGCCACCCGGGGGATTTCGGGAACCTCTCTCCAAAGATGGCAAAATC  
AGGAAATTCAAACCGAATCTCTTCGCCACTTTGTTCCGCCGTACTIONCCTGGGCAGA  
TCCGTCGTGATCCACGAGCAGGAAGACGACATGGGCAAGGGCAACAACAAGGCCAGCCTG  
GAGAACGGCAACGCGGGCAAGCGCCTGGCTTGTGCTGCGTGATCGGGGTGTGCAGCGGGAGC  
TTGTGGGAAGAGAAACTGCCTGAGGTGGCGGACAAGAAGAAGAGATTGCTCAGAACAAAG  
CTT

>Zebra\_finch\_SOD3

ATGTTTCTGATTCTTTCTCTGGTCATTGGGCTTACCCTGTCTGCCTCTGGTGTGATGACA  
GACAAGGAAACTGACCCATGCCAGGAGTCACTGAATGAAATACAGAAAACAAGTGAACGAC  
CTCTGGCAGAATTTGCTCTACCCAGTAACAAATGGTAACGACACTGATGGAATGATTAC  
GCCACTTGTGAAATGAAGCCCAGCTCCAAAATAGATGCTGACAAGCCACAAGTGACTGGA  
CAAGTCTTATTCAGGCAGAGTACTCATATGGAAGACTGGAAGCCTATTTTACTTGGAT

GGGTTTCCACTGGATAACAATCAGTCCAGCAGAGCTATTCACATCCATGAGCTTGGAGAC  
CTCAGCAATGGCTGTGATTCTACAGGGGGACACTATAACCCTTTCAGAGTGAATCATCCT  
CGTCACCCAGGAGATTTTGGCAACTTTCTTCTAAAGAAGGCAAATCAGAAAATACAAA  
ACAAACCTCTTTGCCACAATCTTTGGTCCATATTCCATCATGGGCAGATCTGTTGTAATC  
CACGAGCAGGAAGATGACATGGGCAAGGGCAATAATAAGGCCAGTTTGGAAAATGGAAAT  
GCTGGGAAACGTCTGGCTTGTGTGTGATTGGGATAAGCAACAAGAACCTGTGGGAAGAG  
AAACTGCCTGAGGTTACGGACAAGAAGAAGAGAGGGCTCAACAGAAGAACATACAGCCAG  
GCT

>Rock\_pigeon\_SOD3

ATGCTTCTGCTTCTTTCTCTGGTCTGGCTGGGCTTGCCTGTCTGCCTCTGGTGGCGTGACA  
GACAAAGAAAGTGATTCAAGCCAAGAGCCATTTCAAGACATAGAGACAAAAGTGAACGAC  
CTCTGGCAGAGTTTGTCTATCCGGTAGCGCCTGGTAATGAGAGCGACAGGATGATTTAC  
GCCACTTGTGAAATGAAGCCCAGCTCCAAAATAGATGCTGACAAGCCACAAGTACTGGA  
CAAGTCTTATTCAGGCAGTATTACTCATATGGAAGACTAGAAGCCATTTTCTACTTGGAT  
GGGTTTCCGCTGGATAATAATCAGTCTGGTAGAGCTATCCACATCCACGAGCTTGGGGAC  
CTCAGCAACGGCTGCGATGCTACGGGAGGACACTATAACCCTTTCAGAGTGAACCACCCC  
CGGCACCCAGGGGATTTTGGCAACTTTTCTAAAGAAGGCAAATCAGAAAATACAAA  
ACTAATCTCTTTGCCACTATGTTTGGTCCATATTCCATCATGGGCAGATCTGTTGTGATC  
CACGAACAGGAAGACGACATGGGCAAGGGCAACAATAAGGCCAGTTTGGAAAATGGAAAC  
GCTGGGAAACGTCTGGCTTGTGCGTGATTGGGATCTGCAACAAGAACTTGTGGGAAGAG  
AAACTGTCTGAAGTTACAGACAAGAAGAAGAGAGGGCTCAACAAACGAACACAGAACCAG  
GTT

>Flycatcher\_SOD3

ATGTTTCTGATTCTTTCTCTGGTCACTGGGCTCGTCCTGTCTGCCTCTGGTGTACCACA  
GACAAGGAAACTGACCCACTCCAGGAATCATTGCATGAAATACAGAAACAAGTGAATGAC  
CTCTGGCAGAATTTGTCTACCCAGTAGCACGTGGTAACGAGACTGATGGGATGATTTAT  
GCCACTTGTGAAATGAAGCCCAGCTCCAAAATAGATGCTGACAAGCCACAAGTACTGGA  
CAAGTCTTATTCAGGCAGCTTTACTCATATGGAAAAAGTGAAGCCATTTTTTACTTGGAT  
GGGTTTCCATTGGATAGCAATCAATCTAGCAGAGCTATACACATCCACGAGCTTGGAGAC  
CTCAGCAATGGCTGTGATTCTACAGGGGGACACTACAACCCTTTCAGAGTGAATCACCCCT  
CGTCACCCAGGAGATTTTGGCAACTTTCTTCCAAAGAAGGCAAATCAGAAAATACAAA  
ACAAACCTCTTTGCTACAGTCTTTGGCCATATTCCATCATGGGCAGATCTGTTGTGATC  
CACGAGCAGGAAGATGACATGGGCAAGGGCAATAATAAGGCCAGTTTGGAAAATGGAAAT  
GCTGGGAAACGTCTGGCTTGTGTGTGATTGGGATAAGCAACAAGAACTTGTGGGAAGAG  
AAACTGCCTGAGGTTATGGACAAGAAGAAGAGAGGGCTCAACAAAAGAATGTACAGCCAG  
GCT

>Medaka\_SOD3

ATGAGTTTGCACAGGTGAGTAAGAGTCTTGAAAACGGCTTTCCTGGTCTGGCTGGCATGC  
AGTCAACAATGCTTCTCAACGCACACCGATCATTGCTCCCACCAGAGTTCTCACAGTAC  
AATGGCACTCTGTATGCCGGCTGCAAAGTGAGCCCCAGCACTTCCCTTCCAGATGACCTG  
CCTAAAGTGTACGGCCAAGCATTGTTAAGCAAGATCACGGACAGGGAAAAGTCCAAGTC  
CTTCTGCAGCTCGCTGGCTTTCCTGAAGATGAGTCGCCACAGTCCAGAGCCATTACATC  
CACCAGTATGGGGATCTGAGCCAAGGATGCATTTCCACTGGTGGACATTACAACCCATAT  
GGGGTGGATCACCTAATCATCCGGGAGACTTTGGTAACTTTGTGGCCACGAGGGGAGA

ATCAGTGAGCAGATAGAATCTGAAGCAACGCTGTTTGGTGGGCTGTCTGTGCTTGAAGA  
GCTGTGGTGGTTACGAAACGATCGACGATTTAGGCCAAGGTGGAGATGTAGGGAGTCTG  
CTGCATGGGAATGCAGGAAGAAGGCTTGCCTGCTGTGTTATTGGAATGTCTTCTCCGAT  
TTATGGGAAGAGCAGCAGAAACTGCAAAGCAGC

>Fugu\_SOD3

ATGCGTCCACACGGGTCCGCGAGTGCATTGGCAGCGCTGATGCTTCTGCTGGCTGATTGT  
CAGCGCTGTGTCTTAGCTGAAGGGAACGGCTCAGCTCTTCCAGAGGCCTCCAGAACAAT  
GGCAGCCTGTACGCGTCTGCAACATGAGACGCGCAGCGCGCTGCCAGAGGATGTGCCT  
CAACTCTACGGTACGTGCTGTTCAAGCAGGACCGGCTCAGGGAATTCTCAGGGTCTC  
TTTCACGTTGGTGGCTTTCTGACTGATGCCGAGCCAAAGCCATCCACATCCATCAGTAC  
GGAGACCTGAGCCAGGGGTGCGGCTCCACCCGGGGCCACTACAACCCATATGGCGAAAAC  
CACCTAACCACCCGGGAGACTTCGGGAACTTCGTGCCTCAGGAGGGAATTATCTCAGCT  
GTGTTGAGTGAAGGCGACGCTGTTCCGAGGATGTCTGCCATTGAGAGCAGTNGTGT  
CACGAAAAGAACGACGACNCTGGCCAGGGCGGCGACGCCGGGAGCCTCCTGCATGAAAAC  
GCGGGGCGGAGGCTGGCCTGCTGCGTTATTGGGATTTCCNTTCCCGATCTGTGGAACCTC  
AACTATCCGAAGTTTGCAGAAAGGATGAAAAAGAAT

>Great\_tit\_SOD3

ATGTTTCTGATTCTTTCCCTGGTCACTGGGCTCGCCCTGTCTGCCACTGCTGTCACAACA  
GACAAGGAAACTGACCCACGCCAGGAGTCACTGCATGAAATACAGAAACAAGTGAACGAC  
CTCTGGCAGAATTTGCTCTACCCTGTAAACGCTGGTAACGAGACTGATGGGATGATTTAC  
ACCACTTGTAAGTGAAGCCAGCTCCAAAATAGATGCTGACAAGCCACAAGTACTGGA  
CAAGTCTTATTCAGGCAGTATTACCCATATGGAAGACTGGAAGCCCTTTTTTACTTGGAT  
GGGTTTCCACTGGATAACAATCAATCTAGCAGAGCTATACACATCCACGAGCTTGGAGAC  
CTCAGCAACGGCTGTGATTCTACAGGGGGACACTATAACCCTTTCAGAGTGAATCACCT  
CGTCAACCAGGAGATTTTGCAACTTTCTTCTAAAGAAGGCAAATCAGAAGATACAAA  
ACAAACATCTTTGCCACAGTCTTTGGTCCGTATTCCATAATGGGCAGATCTGTTGTGATC  
CACGAGCAGGAAGATGACATGGGCAAGGGCAATAATAAGGCCAGTTTAGAAAATGGAAAT  
GCTGGGAAACGTCTGGCTTGTGTGATTGGGATAAGCAACAAGAACTTGTGGGAAGAG  
AAACTGCCTGAGGTTATGGACAAGAAGAAGAGAGGTCTCAAAGAACA

>African\_ostrich\_SOD3

ATGCTTCTGCTTCTTTCTCTGGTCACTGGACTTGCCCTTTCGCCTCTGGTGCCGTGACA  
GAAACCGATCCAAATTCAGAGCCATTTTCATGATATACAGAAAAAGTGAATGACCTCTGG  
CAGAATTTGCTCTATCCAGTAATGGTTAATAATGAGACTGATGGGATACTTTATGCCACC  
TGTGAAATGCTGCCAACTCCAAAATACATGCTAACAAGCCAAAAGTACTGGACGAGTT  
TTGTTCAAACAGTGTACTCATATGGAAGATTAGAAGCAATTTTACTTGGATGGGTTT  
CCATTGCATAACAATCAGTCTGGGAGAGCTATACACATCCACAAGCTCGGAGATCTCAGC  
GACGGCTGTGATTCTACAGCAGGACACTATAACCCTTTCGGCGTGAATCACCTCATCAC  
CCAGGGGATTTTGCAACTTTTCCCTAAAGAAGGCAAATCAGAAAATACAAACCAAAC  
CTCTCTGCCACTATGTTTGGTCCATATTCCATCCTGGGCAGATCCGTTGTGATTCATGAG  
CAGGAAGATGACATGGGCAAGGCAACAACAAGGCCAGTTTGGAAAATGGAAATGCTGGC  
AAACGTCTAGCTTGTGTGATTGGGATATGCAACAAGAACTTGTGGGAAGAGAACTG  
TCTGAGGTTGCAGACAAGAAGAAGAGATGGCTCAACAAGCGAACACACAGCCAGGCT

>Adelie\_penguin\_SOD3

ATGCTTCTGCTTCTTTCTCTGGTCTGGCTTGGCCTGTCTGCCTCTGGCATCATGACA



GACAAAGAACTGATCCAAGCCAAGAGTCATTCATGACATACAGAAAAAGTGAACGAC  
CTCTGGCAGAAATTGCTCTATCCGGTAATGCCTGGTAATGAGACTGATGGGATGATTTAC  
GCCACTTGTGAAATGAGGCCGAGCTCCAGAATAGATACTGACAAGCCACAAGTGAAGTGA  
CAAGTCTTATTAGACAGTATTACTCATATGGAAGATTAGAAGCCATTTTTTACTTGGAT  
GGGTTTCCGTTGGATAATAATCAATCTGGTAGAGCTGTACACATCCATGAGCTTGGGGAT  
CTCAGCAACGGCTGTGATTCTACGGGAGGACACTATAACCCTTTCAGCGTGAATCACCCC  
CGTCACCCAGGGGATTTTGGCAACTTTTTCTAAAGAAGGCCAAAATCAGAAAATACAAA  
CCAAATCTCTCTGCCACTATGTTTGGTCCATATTCCATCATGGGCAGATCTGTTGTGATC  
CATGAGCAGGAAGACGACATGGGCAAGGGCAACAATAAAGCCAGTTTGGAAAATGGAAAT  
GCTGGGAAACGTCTGGCTTGTGCGTGATTGGGATATGCAACAAGAACTTGTGGGAAGAG  
AAACTGCCCCAGGCTACAGACAAGAAGAAGAGAGGGCTCAACAAAACGAACA

>common\_starling\_SOD3

ATGTTTCTGATTCTTTCTCTGGTCACTGGGCTCGCCCTGTCTGCCTCTGGTGTGATGACA  
GACAAGGAACTGACCCACTCCAGGAGTCATTGCATGAAATACAGAAACAAGTGAACGAC  
CTGTGGCAGAATTTGCTCTACCCAGTAGCACGTGGTAACGAGACTGATGGGATGATGTAC  
GCCACTTGTGAAATGAAGCCCAGCTCCAAAATAGATGCTGACAAGCCACAAGTGAAGTGA  
CAAGTCTTATTAGGCAGCTTTACTCATATGGAAGACTGGAAGCCATTTTTTACTTGGAT  
GGGTTTCCACTGGATAACAATCAATCTAGCAGAGCTATACACATCCACGAGCTTGGAGAC  
CTCAGCAATGGCTGTGATTCTACAGGGGGACACTATAACCCTTTCAGAGTGAATCACCCCT  
CGTCACCCAGGAGATTTTGGCAACTTTCTTCTAAAGAAGGCCAAAATCAGAAAATACAAA  
ACAAACCTCTCTGCCACAGTCTTTGGTCCATATTCCATCATGGGCAGATCTGTTGTGATC  
CACGAACAGGAAGATGATATGGGCAAGGGCAATAATAAGGCCAGTTTGGAAAATGGAAAT  
GCTGGGAAACGTCTGGCTTGTGCGTGATTGGGATAAGCAACAAGAACTTGTGGGAAGAG  
AAACTGCCTGAGGTGATGGACAAGAAGAAGAGAGGGCTCAACAAAAGAACATACAGCCAG  
GCT

>central\_bearded\_dragon\_SOD3

ATGTTCTGCTTCTGTTTCTTGACACCAGGCTTGATTCTTTGTGATTCTGATGGCATACCA  
GCAGATGTCCAGCCTTTGACCAAAGCCCACTTGAAGACATTCAGAAAAAGTTAATGAC  
TTATGGCTGAGTTTGTCTTACCCCCAGTTCTATGAGGAGCTGCTGGCAACCAACCAGACT  
GCTTATGCTGTGTGTAGTGAACCCAACACCAAATTGGATGCAGACAAGCCACAGGTG  
ACTGGGCATGTTCTTTTCAAGCAAGCCTATCCATATGGAAAATTGGAGGCTGTTTTCTAT  
TTGGATGGGTTTCTGCAGGCACCAACTTGTCTGGCAGAGCTATTCATGTTACCAGCAT  
GGAGACCTCAGTGACAGCTGTGACTCTGCTGGGGGACACTACAATCCTTTCAAAGTAAAT  
CACCTAAACATCCTGGGGACTTTGGGAACCTTACTCTAAAGGAGGCCAAAATTATAAAA  
TACAAATCCAATCTCACGGCAACTTTTTTGGTCCACACACCATTATAGGAAGATCCATT  
GTGATCCATGAACAGGAAGATGACCTAGGGAAAGGGAGCAACAAAGCCAGCCTGGAGAAT  
GGAAATGCTGGTAAACGTCTGGCTTGTGTGTCATTGGAACATCCAACAAAAACCAGTGG  
GCAATCAGTTTGTGAGATTCCAGCAAAGAGGAGGAAAAGGATCACAAAA

>Gecko\_SOD3

ATGTCCCTGCTGCGGTTTCTAGTCACGGGCTTGATCCTTTGTGTATCTGATGAAACAAAA  
CAAGAAGAAAGCTCCAAGCTTGCCATTGAGGAGACTCAGGGAAAGCTGAATTTACTGTGG  
CTGGCTATCCTCTACCCAAATATCTACGGGCACTTGTACGAAGGCAACTGGACCTATGCC  
GCTTGTGAATTGAAGCCCAGTACCAACCTAGAAGCTGGCAAACACAGGTGACAGGGGAGA  
GTTCTGTTCAAGCAAATTCACCCACATGGAAAAGTGAAGGCCATATTCTACCTGGATGGG

TTTCCCGAGGACGCCAACCAAACCTGGTAGAGCTATCCACATCCATGAACTGGGAGACCTC  
AGCAACGGCTGTGATTCTGTACGGCCACTACAATCCTTTCAAAGTCCGTCACCCCAAC  
CATCCGGGGGACTTTGGAACTTCTATCCTAAAGATGGCAAGATCAGAACATTGATGGTC  
AACCTCCAACCGTCTCTTTTTGGCCCCAAGCTGTTCTAGGAAGATCTGTCGTGATCCAC  
GAGAATGCAGACGATATGGGGAAAGGAAAAACACAGGCAGTTTAGAACATGGAAATGCT  
GGCAAACGCTTGGCTTGCTGCGTCATTGGATACTGCACAAAAGAATTGTGGCTGAAGGCC  
TACGAGGAGCTTCTTAAGCTCAGAGAC

>Taiwan\_habu\_SOD3

ATGAAGGGTCTGACTTGGTCCAACATGCTGCTTCTGCTGCTGCTCACTCCCAGCTTGGTC  
CTTTGTGACACTAACACCACCGTGGTATGGGAAGACGCGCCGTCTACCGTCAGCCCCCTT  
GTAGACATGCAGAAGAAAATTAACGATCTGTGGCTGAGTTTGCTGTACCCCCAGCTATAC  
GAGGACATCATCAAAGCCAACCGGACCGCCTACGCTTGTGCGCAGTCAAGCCCAGTAGC  
AAATTAGAGGCGGAGAAACCTCAGGTGAAGGGTTTCGGTTTTGTTCAAGCAGGGCTACCCC  
CATGGAAAGCTGGAGGTCATCATCTACCTGGCCGGCTTTCCCATGAACACATCGGCCAGG  
GCCATTCACGTCCACCAGTACGGTGACCTCAGCGACGGCTGCGATTTCGGTCGGAGGTCAC  
TACAACCCTTGGAAAGTCAACCACCCTCACCATCCTGGGGATTTTGGGAACTTTGAGCCT  
CAAGAGGGCAAGGTTCAAAGATTCAAATCGAACCTCAAAGCCACCCTCTTTGGACCCAG  
ACCATTCTAGGAAGATCGGTTGTGATCCACGAGCAGAAAGATGACCTGGGAAAGGGCGGC  
AACAAAGGCAGCCTGGAGCACGGGAACGCTGGCCTGCGTCTAGCGTGTTGCGTCATCGGC  
ACCTGTAAGGAGAACCTGTGGGAGCAGCATTTGCCTAAAGTCCCCACCAAAGGAAGAGA  
AGGGTTATAAAATTGGGGGTCCCT

>green\_sea\_turtle\_SOD3

ATGTTTCTGTTCTTTACCTGGTCATCAGCCTGGGCCTCTCTGCATCTGGTGTTGTGAGG  
GGAGAAGGTGAGGTTGATTCCAATGGAGACAGCCCACTTCAAGACATACAGAAAAAAGTG  
AATGACCTGTGGCAGAATTTACTCTACCCACAGTTCATCAATGAGGAGACTGACCGGGCA  
GGTTATGCCACCTGTGAAGTGAAGCCAGCTCCAACCTAGATGCTGACAAGCCACAGGTG  
ACAGGCCAAGTCTTGTTCAGACAGTCTACCCAAATGGAAAAGTGGAGGCTCTCTTTGAC  
TTGAATGGGTTTCCGTCAGGCAGCAATCTGTCTGGCAGAGCTATTACATCCATAAGCTC  
GGAGACCTCAGCAACAGCTGTGACTCTACTGGGGGGCACTATAACCCTTTCAATGTGAAC  
CACCTCGCCATCCAGGGGATTTTGGCAACTTCTACTCTAAAGAAGGCAAAATTAGAAAA  
TACAAGCCAAATCTGCTCGCCACTCTGTTTGGCCCTACTCCGTCATGGGGAGATCCATT  
GTGATCCATGAACAGGAAGATGACATGGGCAAGGGTAACAATAAAGCCAGTTTGGAGAAT  
GGGAATGCTGGCAGACGCTAGCTTGTGTCATTGGGATATGCAACAAGAACTTATGG  
GAGAAAAAGCTTCTGACATTACAGACAGGAGGAAGAAGAGGATCACAAATGAGCACAAA  
ACAACCAGGCCTAAC

>Chinese\_alligator\_SOD3

ATGTTTCTATCCCTTTGCTGGTATCCGTGGGGCTGTTCTATCCTTACCTGGTGTTGTA  
AGCGGAGAATTGGAGCCTGTTCTGAAACGGAAGGCCTGTTTCAAGAATTACGGAAAAAA  
GTGAATGACTTGTGGCAGAATTTGCTCTACCCACAATTTATCAGAGACAGTACTGGACG  
GCTTACGCTACTTGTGAAATGAAGCCAGCTCCAATTAGATGCTGACAAACCACAAGTG  
ACAGGACAAATCTTGTCAAACAGTCTACCCAATTGGAAAGCTAGAAGCTTTCTTTGAC  
CTGGATGGGTTTCCATCAGAGAACAATCAGTTGGGTAGGGCTATTTCATATCCATAAGTTT  
GGAGACCTCAGCGACGGCTGTAACACTACTGGAGGACACTATAACCCTTCAATGTGAAC  
CATCTCACCATCCAGGGGATTTTGGCAACTTCTACTCTAAAGAAGGCAAAATTAGAAAA

TACAAGTCAAACCTGTCTGCTACTCTGTTTGGCCATATACCATTATGGGCAGATCTGTT  
GTTATTCATGAGCAGGAAGATGACATGGGCAAAGGTAACAATAAGGCCAGTTTGGAGAAT  
GGAAATGCGGGCAGACGCTGGCTTGTGTGTCATTGGGATATGCGACAAGAACATGTGG  
GAGAATAAATTCTCCAAGTTTGTAGAAAGGAGGAAAAGAGGCTCACAAAATGAGCACAGA  
AGCAGGCCCAGC

>Gharial\_SOD3

ATGTTTCTGGCCTTTTGTCTGGTATCCGTGGGGCTGCTCCTCTCCTTACCTGGTGTGCA  
AGGGGAGAATTGGAGCCTGTTCTGAAATGGAAGGCCTGTTTCAAGAATTACAGAAAAAA  
GTGAATGACTTGTGGCAGAATTTGCTCTACCCACAATTTCTCAGACAGAGTGAGTGGACG  
GCTTACGCTACTTGTGAAATGAAGCCTAGCTCCAAATTAGATGCTGACAAACCACAAGTG  
ACAGGACAAATCTTGTCAAACAGTCTACCCAATTGGAAAGCTAGAAGCTTTCTTTGAC  
CTGGATGGGCTTCCATCAGAGAACAATCAGTTGGGTAGGGCTATTACATCCACAAGTTT  
GGAGACCTCAGTGATGGCTGTAACACTACTGGAGGACACTATAACCCCTTCAATGTGAAC  
CATCTCACCATCCAGGGGATTTTGGCAACTTCTACTCTAAAGATGGCAAATTAGAAAA  
TACAAGTCAAACCTGTCTGCTACTCTGTTTGGCCATATACCATTATGGGCAGATCTGTT  
GTTATTCATGAGCAGGAAGATGACATGGGCAAAGGTAACAATAAGGCCAGTTTGGAGAAT  
GGAAATGCGGGCAGACGCTGGCTTGTGTGTCATTGGGATATGTGACAAGAACACGTGG  
GAGAATAAATTCTCCAAGTTTGCAGAAAGAAGGAAAAGAGGCTCACAAAATGAGCACAGG  
AGCAGGCCCAAC

>southern\_platyfish\_SOD3

ATGCGCATTACAGGTCATCGAGTGGACTCCAACTGCTCTGCTGGTACTGCTGGCCAGT  
TGTC AATGCATCTCAGCAAACACCGATACTCTCCTTCTCCAGAGGTCTCTCAGTACAAT  
GGCACTCTGTATGCAGCCTGCAAAGTGAGACCCAGCACTTCACTTCTGAGGGGCTTCCC  
AAGGTATACGGGCAGGTGCTGTTTAAACAAGAGCAGTCTGAGGGAAAGCTTCAAGTCTC  
CTTCGGCTCAATGGCTTCCCAACAGAGGATGCTCCAGAACCCAGAGCCGTGCACATCCAT  
CAGTACGGAGACCTGAGCCGGGATGCGACTCAACCGGTGGTCACTACAACCCGTTTGAT  
GTGAACCATCTAAACACCCAGGAGACTTTGGTAACTTCATCTCACAGGAAGGACAAATC  
AAAGTGCTGATTGAATCAGAGGCCACCCTGTTTGGAAACCTGTCTGTGCTCGGAAGAGCG  
GTGGTGATCCATGAGAAGAGAGACGACTTGGGGCTCGGCGGAGACATCGGGAGCCTGCTC  
CATGGGAACGCAGGCCGAGGCTTGCTGCTGCGTTATTGGGATGTCCTCCTCCAGCCCC  
TGGAATATGCAACATGAGCGTTTTCGCAAGGCAGGTCAGGAGGAAC

>spotted\_gar\_SOD3

ATGGCGAAAATATTTTCTGGCTAAAATGTCTGCTCATGCTGGTCTTCTTGGGAATCCAC  
GTGTTTTGCTGTGAAGATGGCACAGTCAGCGAAGAGCAGGTGCAGAAATACATCGAGGAG  
AGGATGAAAAGCCGTTTGGCCTCTTCTGCTACCCAGAAAGCGGGTAACGACGACCAAAC  
GTCTACGCAGCATGTGTATGAAGCCAGCAGTAACTGGAAGAAGGCAAGCCACAAGTC  
ACAGGAGAAGTGCTTTTCAAGCAGCTCTACCCGATGGAAAACCTTGACGTGATATTTAGA  
CTGGCGGGCTTCAACACCACCGATAACACATCAAAGCCATCCACGTTACACGTACGGA  
GACCTCAGCAACGGGTGCGATTCTACCGCGGCCATTTCAACCCCAAAATGTTGACCAC  
CCCATGCACCCAGGCGACTTTGGCAACTTTACGCCAAAGAAGGGGAAGATACATAAAATG  
AAGAGCAACAGCAAAGCCACCATGTTTGGGCCAGAGTCGGTACTCAGCCGGGCAGTGGTG  
GTTACGAGAAGGAAGACGACATGGGAAAAGGAGGCAATGCTGGAAGCCTGCTGCACGGA  
AACGCAGGCAAGCGGCTGGCCTGCTGTGTCATTGGGATCACCAAGCAGAAGCTCTGGAGC  
GACACAATCGAAAGCACCCCTTCAAGGACTGGCATCCTGACCAGGGGGTTCCCTGCCTT

GTGCCATTGCTTGCCAGGAAAATCTCAAATCCCCCTCAACTCTGAATTGGAAGAAACG  
GTTGGAAGAATGGAAGAG

>guppy\_SOD3

ATGCGCATTAAACAGGTCATCGAGTGGACTCCAACTGCTCTGCTGGTACTGCTGGCCAGT  
TGCAATGCATCTCAGCAAACACCGATACTCTCCTTCCTCCAGAGGTCTCTCAGTACAAT  
GGCACTCTGTATGCAGCCTGCAAAGTGAGACCCAGCACTTCACTTCCTGAGGGGCTTCCC  
AAGGTATACGGGCAGGTGCTGTTCAAACAGGAGCAGTCTGAGGGAAAGCTTCAAGTCCTC  
CTTCGGCTCAATGGCTTCCCAGCAGAGGACGCTCCAGAACCCAGAGCCGTGCACATCCAT  
CAGTACGGAGACCTGAGCCGGGGATGCGATTCAACCGGTGGCCACTACAACCCGTTTAGT  
GTGAACCATCTAAACACCCGGGAGACTTTGGCAACTTCGTCTCACAGGAAGGACAAATC  
ATTGAGCTGATTGAATCAGAGGCCACCCTGTTTGGAGGCCTGTCTGCGCTCGGAAGAGCG  
GTGGTGATCCATGAGAAGAGAGACGACCTGGGGCTCGGCGGAGACATCGGGAGCCTGCTC  
CATGGGAACGCAGGCCCGCAGGCTTGCTGCTGCGTTATCGGGATGTCCTCCTCCAGCGTC  
TGAATACGCAGCATGAGCGTTTCGCAAGGCAGCTTAGGAGGAAT
