# Supplementary material for: Molecular evolutionary patterns of NAD+/Sirtuin aging signaling pathway across taxa
Source: PubMed Central journal article supplement (PMC5540417; doi:10.1371/journal.pone.0182306), 2017-08-02
Supplement: pone.0182306.s002.pdf [file pone.0182306.s002.pdf]

| Taxon                | Species                           | PAR1                             | PAR2                            | SIRT1                           | SIRT2                           | SIRT6                           | MIR55                           | FOXO3a                          | TP53                            | PPARGC1A                                       | SOD3                            |
|----------------------|-----------------------------------|----------------------------------|---------------------------------|---------------------------------|---------------------------------|---------------------------------|---------------------------------|---------------------------------|---------------------------------|------------------------------------------------|---------------------------------|
| Fruitlet             | <i>Drosophila melanogaster</i>    | NCBI protein id: NP_001104452.1  | x                               | NCBI protein id: NP_47735.1     | NCBI protein id: NP_65880.2     | NCBI protein id: NP_46990.2     | NCBI protein id: NP_0016653.1   | NCBI protein id: NP_996205.1    | NCBI protein id: NP_996268.1    | NCBI protein id: NP_649469.2                   | NCBI protein id: NP_725046.2    |
| Worm                 | <i>Caenorhabditis elegans</i>     | NCBI protein id: NP_491072.1     | NCBI protein id: NP_001020571.1 | x                               | NCBI protein id: NP_0155584.1   | x                               | NCBI protein id: NP_001020701.1 | NCBI protein id: NP_001021595.1 | x                               | x                                              | NCBI protein id: NP_0150764.1   |
| Yeast                | <i>Saccharomyces cerevisiae</i>   | x                                | x                               | x                               | NCBI protein id: NP_010242.1    | x                               | NCBI protein id: NP_00810.3     | x                               | x                               | x                                              | x                               |
| Mouse                | <i>Mus musculus</i>               | NCBI protein id: NP_031441.2     | NCBI protein id: NP_033762.1    | NCBI protein id: NP_062786.1    | NCBI protein id: NP_001116271.1 | NCBI protein id: NP_063671.1    | NCBI protein id: NP_084239.1    | NCBI protein id: NP_062714.1    | NCBI protein id: BAAB2343.1     | NCBI protein id: NP_032930.1                   | NCBI protein id: NP_035655.1    |
| Model species        | <i>Homo sapiens</i>               | NCBI protein id: NP_001191199.1  | NCBI protein id: NP_001191199.1 | NCBI protein id: NP_001334404.4 | NCBI protein id: NP_058599.1    | NCBI protein id: NP_001020701.1 | NCBI protein id: NP_001020701.1 | NCBI protein id: NP_001020701.1 | NCBI protein id: AAH95597.1     | NCBI protein id: NP_017212627.1                | NCBI protein id: NP_001332758.1 |
| Human                | <i>Homo sapiens</i>               | NCBI protein id: NP_001069.2     | NCBI protein id: NP_005475.2    | NCBI protein id: NP_002718508.1 | AAK51133.1                      | NCBI protein id: NP_07623.2     | NCBI protein id: NP_114108.1    | NCBI protein id: NP_963853.1    | NCBI protein id: BAC16799.1     | NCBI protein id: NP_013137860.1                | NCBI protein id: CAG46551.1     |
| Macaque              | <i>Macaca mulatta</i>             | NCBI protein id: XP_005541069.1  | NCBI protein id: NP_001244367.1 | NCBI protein id: NP_015003002.1 | NCBI protein id: XP_014979357.1 | NCBI protein id: NP_001101773.1 | NCBI protein id: NP_014983320.1 | NCBI protein id: NP_014993103.1 | NCBI protein id: AA891534.1     | NCBI protein id: NP_014993594.1                | NCBI protein id: NP_001181261.1 |
| Orangutan            | <i>Pongo abelii</i>               | NCBI protein id: XP_00289428.2   | NCBI protein id: NP_002824550.1 | NCBI protein id: NP_002820941.1 | NCBI protein id: NP_001125519.1 | NCBI protein id: XP_003779077.1 | NCBI protein id: NP_001124839.1 | NCBI protein id: NP_005240402.1 | NCBI protein id: XP_002827020.1 | NCBI protein id: NP_001125407.1                | NCBI protein id: NP_005238123.1 |
| Naked mole rat       | <i>Heterocephalus glaber</i>      | NCBI protein id: NP_001291751.1  | NCBI protein id: NP_012921120.1 | NCBI protein id: XP_012928418.1 | NCBI protein id: XP_012909315.1 | NCBI protein id: NP_001297193.1 | NCBI protein id: NP_00484395.1  | NCBI protein id: NP_00485478.1  | NCBI protein id: NP_001297199.1 | NCBI protein id: NP_021115878.1                | NCBI protein id: NP_004847262.1 |
| Rabbit               | <i>Oryctolagus cuniculus</i>      | NCBI protein id: XP_002805741.1  | NCBI protein id: XP_002805741.1 | NCBI protein id: XP_002718508.1 | NCBI protein id: XP_002853379.1 | x                               | NCBI protein id: NP_002196271.1 | NCBI protein id: NP_002196271.1 | NCBI protein id: CA82216.1      | NCBI protein id: NP_00270423.1                 | NCBI protein id: NP_001076101.1 |
| Panda                | <i>Ailuropus melanoleucus</i>     | NCBI protein id: XP_011232467.2  | NCBI protein id: XP_002929561.1 | NCBI protein id: XP_019863508.1 | NCBI protein id: XP_002927438.2 | NCBI protein id: XP_002928505.1 | NCBI protein id: XP_002927098.1 | NCBI protein id: XP_019653183.1 | NCBI protein id: XP_002924483.1 | NCBI protein id: NP_019656088.1                | NCBI protein id: XP_011235612.1 |
| Doq                  | <i>Canis lupus familiaris</i>     | NCBI protein id: XP_547506.3     | NCBI protein id: XP_532618.3    | NCBI protein id: XP_548130.2    | NCBI protein id: NP_01397805.1  | NCBI protein id: XP_542183.2    | NCBI protein id: NP_532953.3    | NCBI protein id: NP_003638448.1 | NCBI protein id: BAA78379.1     | NCBI protein id: NP_005618712.1                | NCBI protein id: NP_545973.3    |
| Horse                | <i>Equus caballus</i>             | NCBI protein id: XP_001978088.1  | NCBI protein id: NP_001978088.1 | NCBI protein id: NP_001978088.1 | NCBI protein id: NP_001978088.1 | NCBI protein id: NP_001978088.1 | NCBI protein id: NP_001978088.1 | NCBI protein id: NP_001978088.1 | NCBI protein id: NP_001189334.1 | NCBI protein id: NP_014594249.1                | NCBI protein id: NP_005615141.2 |
| Cow                  | <i>Bos taurus</i>                 | NCBI protein id: NP_777176.1     | NCBI protein id: NP_010808738.1 | NCBI protein id: NP_001179909.1 | NCBI protein id: NP_00170003.1  | NCBI protein id: NP_001091553.1 | NCBI protein id: NP_001093588.1 | NCBI protein id: NP_001193012.1 | NCBI protein id: CAAS7348.1     | NCBI protein id: NP_808814.1                   | NCBI protein id: NP_777040.1    |
| Pig                  | <i>Sus scrofa</i>                 | NCBI protein id: XP_003597689.2  | NCBI protein id: XP_003597689.2 | NCBI protein id: NP_001193222.1 | NCBI protein id: NP_001107743.1 | NCBI protein id: NP_001107743.1 | NCBI protein id: NP_001107743.1 | NCBI protein id: NP_001129431.1 | NCBI protein id: NP_989899.3    | NCBI protein id: NP_999128.2                   | NCBI protein id: NP_02056182.1  |
| Dolphin              | <i>Tursiops truncatus</i>         | NCBI protein id: XP_004320153.2  | NCBI protein id: XP_004320153.2 | NCBI protein id: XP_004320153.2 | NCBI protein id: XP_004320153.2 | NCBI protein id: XP_004320153.2 | NCBI protein id: NP_004320153.2 | NCBI protein id: NP_004320153.2 | NCBI protein id: NP_01979792.1  | NCBI protein id: NP_019793967.1                | NCBI protein id: NP_019793865.1 |
| Elephant             | <i>Loxodonta africana</i>         | NCBI protein id: XP_010594251.1  | NCBI protein id: XP_010599303.1 | NCBI protein id: XP_010597464.1 | NCBI protein id: XP_003420816.1 | NCBI protein id: XP_003421843.1 | NCBI protein id: NP_010599670.1 | NCBI protein id: XP_003404353.1 | NCBI protein id: NP_01058488.1  | NCBI protein id: NP_010589671.1                | NCBI protein id: NP_003411340.2 |
| Armadillo            | <i>Dasypus novemcinctus</i>       | NCBI protein id: XP_004447247.1  | NCBI protein id: XP_004447247.1 | NCBI protein id: XP_004470564.1 | NCBI protein id: XP_004481514.2 | NCBI protein id: XP_01382537.1  | NCBI protein id: NP_012314946.1 | NCBI protein id: NP_004484669.1 | NCBI protein id: NP_012384548.1 | NCBI protein id: NP_004461876.1                | NCBI protein id: NP_012381927.1 |
| Opussum              | <i>Monodelphis domestica</i>      | NCBI protein id: XP_007481563.1  | NCBI protein id: XP_007479798.1 | NCBI protein id: XP_001369605.3 | NCBI protein id: XP_007491852.1 | NCBI protein id: XP_001374380.1 | NCBI protein id: NP_00138207.1  | NCBI protein id: NP_001384953.1 | NCBI protein id: NP_007484310.1 | NCBI protein id: NP_007496771.1                | NCBI protein id: NP_016278786.1 |
| Mammal               | <i>Ornithorynchus anatinus</i>    | NCBI protein id: XP_01608391.1   | NCBI protein id: XP_007854968.1 | NCBI protein id: NP_001508324.2 | x                               | NCBI protein id: NP_016080887.1 | NCBI protein id: NP_001506236.1 | NCBI protein id: NP_001511165.2 | NCBI protein id: NP_001521340.4 | NCBI protein id: NP_007871417.1                | NCBI protein id: NP_003428806.2 |
| Chicken              | <i>Gallus gallus</i>              | NCBI protein id: NP_001004761.1  | x                               | NCBI protein id: NP_001004761.1 | NCBI protein id: NP_001004761.1 | NCBI protein id: NP_001004761.1 | NCBI protein id: NP_001004761.1 | NCBI protein id: NP_001004761.1 | NCBI protein id: NP_990595.1    | NCBI protein id: NP_001004657.1                | NCBI protein id: NP_015114186.1 |
| Turkey               | <i>Meleagris gallopavo</i>        | NCBI protein id: XP_010704958.1  | x                               | NCBI protein id: XP_010712566.1 | NCBI protein id: XP_003213275.1 | NCBI protein id: NP_010704918   | NCBI protein id: NP_010705770.1 | NCBI protein id: NP_010705770.1 | x                               | NCBI protein id: NP_003059431.1                | NCBI protein id: NP_019407472.1 |
| Duck                 | <i>Anas platyrhynchos</i>         | NCBI protein id: XP_005014803.3  | x                               | NCBI protein id: XP_005009174.1 | x                               | NCBI protein id: NP_021127484.1 | NCBI protein id: NP_005022109   | NCBI protein id: NP_021295208.1 | x                               | NCBI protein id: NP_005031720.1                | NCBI protein id: NP_005019322.1 |
| Flycatcher           | <i>Ficedula albicollis</i>        | NCBI protein id: XP_00505307.2   | x                               | NCBI protein id: XP_00505307.2  | x                               | NCBI protein id: NP_00505307.2  | NCBI protein id: NP_00505307.2  | NCBI protein id: NP_00505307.2  | x                               | NCBI protein id: NP_005054466.1                | NCBI protein id: NP_005054465.1 |
| Common seahorse      | <i>Stenus vulgaris</i>            | NCBI protein id: XP_014742639.1  | x                               | NCBI protein id: XP_014738778.1 | NCBI protein id: XP_014749139.1 | NCBI protein id: XP_014742716.1 | NCBI protein id: NP_014748112   | NCBI protein id: NP_014743370.1 | NCBI protein id: NP_014748888.1 | NCBI protein id: NP_014740037.1                | NCBI protein id: NP_01474886.1  |
| Great tit            | <i>Parus major</i>                | NCBI protein id: XP_015478265.1  | x                               | NCBI protein id: XP_015488114.1 | NCBI protein id: XP_015472185.1 | NCBI protein id: XP_015507146.1 | NCBI protein id: NP_015478265.1 | NCBI protein id: NP_015478009.1 | x                               | NCBI protein id: NP_015480810.1                | NCBI protein id: NP_015480484.1 |
| Zebra finch          | <i>Taeniopygia guttata</i>        | NCBI protein id: XP_012429832.1  | x                               | NCBI protein id: XP_012429832.1 | x                               | NCBI protein id: XP_002195684.1 | NCBI protein id: NP_012427623   | NCBI protein id: NP_002195684.1 | x                               | NCBI protein id: NP_002192650.2                | NCBI protein id: NP_002192051.1 |
| Rock pigeon          | <i>Columba livia</i>              | NCBI protein id: XP_005057407.2  | x                               | NCBI protein id: XP_005512829.1 | x                               | NCBI protein id: XP_005511570.1 | NCBI protein id: NP_005511570.1 | NCBI protein id: NP_005511570.1 | x                               | NCBI protein id: NP_005511343.1                | NCBI protein id: NP_005511343.1 |
| Adelie penguin       | <i>Pygoscelis adeliae</i>         | NCBI protein id: XP_00931916.1   | x                               | NCBI protein id: XP_009324269.1 | x                               | NCBI protein id: NP_009321769.1 | NCBI protein id: NP_009324493   | NCBI protein id: NP_009324496.1 | x                               | NCBI protein id: NP_005501343.1                | NCBI protein id: NP_009318163.1 |
| African ostrich      | <i>Struthio camelus</i>           | NCBI protein id: XP_009684683.1  | x                               | NCBI protein id: XP_009674395.1 | x                               | NCBI protein id: NP_009678007.1 | NCBI protein id: NP_009681336   | NCBI protein id: NP_009675233.1 | x                               | NCBI protein id: NP_009671609.1                | NCBI protein id: NP_009671612.1 |
| Aves                 | <i>Anolis carolinensis</i>        | NCBI protein id: XP_003216114.1  | NCBI protein id: NP_008115375.1 | NCBI protein id: XP_003223739.1 | NCBI protein id: XP_003229912.2 | NCBI protein id: NP_008123970.2 | NCBI protein id: NP_003216145   | NCBI protein id: NP_003215683.1 | NCBI protein id: NP_008123458.1 | NCBI protein id: NP_008109489.1                | NCBI protein id: NP_008109486.1 |
| bearded dragon       | <i>Pogona vitticeps</i>           | NCBI protein id: XP_020642204.1  | NCBI protein id: XP_020668376.1 | NCBI protein id: XP_020668072.1 | NCBI protein id: XP_020642903.1 | NCBI protein id: NP_020636227.1 | NCBI protein id: NP_020650441   | NCBI protein id: NP_020656989.1 | NCBI protein id: NP_020665272.1 | NCBI protein id: NP_020636089.1                | NCBI protein id: NP_020636087.1 |
| Taiwan habu          | <i>Protonotrops mucronatus</i>    | NCBI protein id: XP_015675666.1  | NCBI protein id: NP_015680516.1 | NCBI protein id: NP_015672141.1 | NCBI protein id: NP_015662155.1 | NCBI protein id: NP_015680119.1 | NCBI protein id: NP_015673444.1 | NCBI protein id: NP_015676797.1 | x                               | NCBI protein id: NP_015680312                  | NCBI protein id: NP_015684088.1 |
| Gecko                | <i>Gekko japonicus</i>            | NCBI protein id: XP_008118141.1  | NCBI protein id: XP_015278033.1 | NCBI protein id: NP_008118141.1 | NCBI protein id: NP_015278033.1 | NCBI protein id: NP_008118141.1 | NCBI protein id: NP_008118141.1 | NCBI protein id: NP_008118141.1 | NCBI protein id: NP_015279412.1 | NCBI protein id: NP_015272246.1                | NCBI protein id: NP_015272245.1 |
| Painted turtle       | <i>Chrysemys picta bellii</i>     | NCBI protein id: XP_005289622.1  | NCBI protein id: NP_008117291.1 | NCBI protein id: XP_005297342.1 | NCBI protein id: NP_005293248.2 | NCBI protein id: NP_005281259.1 | NCBI protein id: NP_008165301.1 | NCBI protein id: NP_005287710.1 | NCBI protein id: NP_005279396.1 | NCBI protein id: NP_005303505.1                | NCBI protein id: NP_005303507.1 |
| Softshell turtle     | <i>Apalone spinifer</i>           | NCBI protein id: XP_008118141.1  | x                               | NCBI protein id: XP_008118141.1 | NCBI protein id: NP_008118141.1 | NCBI protein id: NP_008118141.1 | NCBI protein id: NP_008118141.1 | NCBI protein id: NP_008118141.1 | NCBI protein id: NP_006112349.1 | NCBI protein id: NP_006138221.1                | NCBI protein id: NP_006138225.1 |
| American alligator   | <i>Alligator mississippiensis</i> | NCBI protein id: XP_003935553.1  | NCBI protein id: XP_006268632.2 | NCBI protein id: NP_019339451.1 | NCBI protein id: NP_019331891.1 | NCBI protein id: NP_014464318.1 | NCBI protein id: XP_014453699.1 | NCBI protein id: KY024684.1     | NCBI protein id: KY028679.1     | NCBI protein id: NP_019335753.1                | NCBI protein id: KY05825.1      |
| Chinese alligator    | <i>Alligator sinensis</i>         | NCBI protein id: XP_014303881.1  | NCBI protein id: XP_008024871.1 | NCBI protein id: NP_014303881.1 | NCBI protein id: NP_014303881.1 | NCBI protein id: NP_014303881.1 | NCBI protein id: NP_014303881.1 | NCBI protein id: NP_014303881.1 | NCBI protein id: NP_006038716.1 | NCBI protein id: NP_006024875.1                | NCBI protein id: NP_006024876.1 |
| Gharial              | <i>Gavialis gangeticus</i>        | NCBI protein id: XP_019372092.1  | NCBI protein id: XP_019367861.1 | NCBI protein id: XP_019363424.1 | x                               | NCBI protein id: NP_019368938.1 | NCBI protein id: NP_019371719   | NCBI protein id: NP_019375775.1 | x                               | NCBI protein id: NP_019381909.1                | NCBI protein id: NP_019381807.1 |
| Green sea turtle     | <i>Chelonia mydas</i>             | NCBI protein id: XP_007071621.1  | NCBI protein id: XP_007072052.1 | NCBI protein id: XP_007054699.1 | NCBI protein id: XP_007068433.1 | NCBI protein id: NP_007072169.1 | NCBI protein id: NP_007059407.1 | NCBI protein id: NP_007057509.1 | x                               | NCBI protein id: NP_007058167.1                | NCBI protein id: NP_007058166.1 |
| tropical clawed frog | <i>Xenopus tropicalis</i>         | NCBI protein id: XP_002941174.2  | NCBI protein id: NP_002934323.2 | NCBI protein id: NP_001136381.1 | NCBI protein id: XP_002935827.3 | NCBI protein id: NP_989533.1    | NCBI protein id: NP_017949732   | NCBI protein id: NP_01096419.1  | NCBI protein id: NP_001001903.1 | NCBI protein id: NP_004911281.1                | NCBI protein id: NP_012827249.1 |
| African clawed frog  | <i>Xenopus laevis</i>             | NCBI protein id: NP_001081571.1  | NCBI protein id: NP_001088535.1 | NCBI protein id: NP_001091195.1 | NCBI protein id: NP_001088536.1 | NCBI protein id: NP_001085592.1 | x                               | NCBI protein id: NP_01086418.1  | NCBI protein id: CAAS4672.1     | NCBI protein id: ACY24354.1                    | x                               |
| Tibetan frog         | <i>Nanorana parkeri</i>           | NCBI protein id: XP_01842352.1   | NCBI protein id: NP_01842531.1  | NCBI protein id: NP_018429020.1 | NCBI protein id: NP_018412784.1 | NCBI protein id: NP_018423983.1 | NCBI protein id: NP_018414321.1 | NCBI protein id: NP_018419253.1 | NCBI protein id: NP_018431451.1 | NCBI protein id: NP_018418337.1                | x                               |
| Cod                  | <i>Gadus morhua</i>               | Ensembl: ENSGMOG00000014929.1    | Ensembl: ENSGMOG00000010852.1   | BLASTN in Ensembl               | Ensembl: ENSGMOG00000014240.1   | Ensembl: ENSGMOG00000012243.1   | Ensembl: ENSGMOG00000008049     | Ensembl: ENSGMOG00000012748     | BLASTN in Ensembl               | NCBI protein id: Ensembl: ENSGMOG00000014713.1 | x                               |
| Tilapia              | <i>Oreochromis niloticus</i>      | NCBI protein id: XP_003449904.1  | NCBI protein id: XP_005478770.1 | NCBI protein id: XP_005478903.1 | NCBI protein id: XP_003449312.1 | NCBI protein id: NP_003449826.1 | NCBI protein id: NP_003439882.2 | NCBI protein id: NP_005454675.1 | NCBI protein id: NP_005463885.1 | NCBI protein id: NP_019208071.1                | NCBI protein id: NP_003454237.1 |
| spotted gar          | <i>Lepisosteus oculatus</i>       | NCBI protein id: XP_0152071493.1 | NCBI protein id: NP_015195173.1 | NCBI protein id: XP_006530852.1 | NCBI protein id: NP_015196298.1 | x                               | NCBI protein id: NP_015217885.1 | NCBI protein id: NP_006280293.1 | NCBI protein id: NP_015196219.1 | NCBI protein id: NP_015200728.1                | NCBI protein id: NP_006280293.1 |
| Medaka               | <i>Oryzias latipes</i>            | NCBI protein id: XP_004083528.1  | NCBI protein id: NP_011484327.1 | NCBI protein id: NP_004077552.1 | NCBI protein id: NP_011481038.1 | NCBI protein id: NP_004079352.1 | NCBI protein id: NP_004077078.1 | NCBI protein id: NP_001153937.1 | NCBI protein id: NP_001098212.1 | NCBI protein id: NP_020667248.1                | NCBI protein id: NP_011480815.1 |
| southern platyfish   | <i>Xiphophorus maculatus</i>      | NCBI protein id: XP_008098201.1  | NCBI protein id: NP_005798607.1 | NCBI protein id: NP_005795318.1 | NCBI protein id: NP_005804579.1 | NCBI protein id: NP_005797215.1 | NCBI protein id: NP_005814190.1 | NCBI protein id: NP_001273216.1 | NCBI protein id: NP_001273218.1 | NCBI protein id: NP_014325970.1                | NCBI protein id: NP_005807205.1 |
| guppy                | <i>Poecilia reticulata</i>        | NCBI protein id: XP_008396253.1  | NCBI protein id: XP_008432237.1 | NCBI protein id: XP_008429238.1 | NCBI protein id: XP_008424361.1 | x                               | NCBI protein id: NP_008396253.1 | NCBI protein id: NP_008396677.1 | NCBI protein id: NP_008433635.1 | NCBI protein id: NP_008434034.1                | NCBI protein id: NP_008429654.1 |
| Fugu                 | <i>Takifugu rubripes</i>          | NCBI protein id: XP_003971725.1  | NCBI protein id: XP_003972920.2 | NCBI protein id: XP_003963777.1 | NCBI protein id: XP_003968      |                                 |                                 |                                 |                                 |                                                |                                 |
