# Supplementary material for: Molecular evolutionary patterns of NAD+/Sirtuin aging signaling pathway across taxa
Source: PubMed Central journal article supplement (PMC5540417; doi:10.1371/journal.pone.0182306), 2017-08-02
Supplement: pone.0182306.s003.pdf [file pone.0182306.s003.pdf]

S3 Table. Lineages test for positive selection by branch-site model using PAML

| Gene         | Models                                  | P   | LnL           | Parameters   |         |         |           |           |
|--------------|-----------------------------------------|-----|---------------|--------------|---------|---------|-----------|-----------|
| <i>MRPS5</i> | Branch-site #1<br>(Mammals)             | 102 | -30920.221289 | site class   | 0       | 1       | 2a        | 2b        |
|              |                                         |     |               | proportion   | 0.62268 | 0.34477 | 0.02095   | 0.01160   |
|              |                                         |     |               | background w | 0.11432 | 1.00000 | 0.11432   | 1.00000   |
|              |                                         |     |               | foreground w | 0.11432 | 1.00000 | 998.98326 | 998.98326 |
|              | Branch-site null #1<br>(Mammals)        | 101 | -30927.633289 | site class   | 0       | 1       | 2a        | 2b        |
|              |                                         |     |               | proportion   | 0.62279 | 0.34476 | 0.02089   | 0.01156   |
|              |                                         |     |               | background w | 0.11431 | 1.00000 | 0.11431   | 1.00000   |
|              |                                         |     |               | foreground w | 0.11431 | 1.00000 | 1.00000   | 1.00000   |
|              | Branch-site #2<br>(Birds)               | 102 | -30923.441079 | site class   | 0       | 1       | 2a        | 2b        |
|              |                                         |     |               | proportion   | 0.57814 | 0.32814 | 0.05978   | 0.03393   |
|              |                                         |     |               | background w | 0.11287 | 1.00000 | 0.11287   | 1.00000   |
|              |                                         |     |               | foreground w | 0.11287 | 1.00000 | 2.57000   | 2.57000   |
|              | Branch-site null #2<br>(Birds)          | 101 | -30927.932329 | site class   | 0       | 1       | 2a        | 2b        |
|              |                                         |     |               | proportion   | 0.57806 | 0.32812 | 0.05986   | 0.03395   |
|              |                                         |     |               | background w | 0.11307 | 1.00000 | 0.11307   | 1.00000   |
|              |                                         |     |               | foreground w | 0.11307 | 1.00000 | 1.00000   | 1.00000   |
|              | Branch-site #3<br>(Birds/Reptiles)      | 102 | -30925.394879 | site class   | 0       | 1       | 2a        | 2b        |
|              |                                         |     |               | proportion   | 0.63803 | 0.36197 | 0.00000   | 0.00000   |
|              |                                         |     |               | background w | 0.11418 | 1.00000 | 0.11418   | 1.00000   |
|              |                                         |     |               | foreground w | 0.11418 | 1.00000 | 3.54000   | 3.54000   |
|              | Branch-site null #3<br>(Birds/Reptiles) | 101 | -30927.365679 | site class   | 0       | 1       | 2a        | 2b        |
|              |                                         |     |               | proportion   | 0.63605 | 0.36395 | 0.00000   | 0.00000   |
|              |                                         |     |               | background w | 0.11422 | 1.00000 | 0.11422   | 1.00000   |
|              |                                         |     |               | foreground w | 0.11422 | 1.00000 | 1.00000   | 1.00000   |

|               |                                    |     |               |              |         |         |         |         |
|---------------|------------------------------------|-----|---------------|--------------|---------|---------|---------|---------|
|               | Branch-site #4<br>(Amphibian)      | 102 | -30925.394879 | site class   | 0       | 1       | 2a      | 2b      |
|               |                                    |     |               | proportion   | 0.63803 | 0.36197 | 0.00000 | 0.00000 |
|               |                                    |     |               | background w | 0.11418 | 1.00000 | 0.11418 | 1.00000 |
|               |                                    |     |               | foreground w | 0.11418 | 1.00000 | 1.00000 | 1.00000 |
|               | Branch-site null #4<br>(Amphibian) | 101 | -30931.762979 | site class   | 0       | 1       | 2a      | 2b      |
|               |                                    |     |               | proportion   | 0.63816 | 0.36184 | 0.00000 | 0.00000 |
|               |                                    |     |               | background w | 0.11412 | 1.00000 | 0.11412 | 1.00000 |
|               |                                    |     |               | foreground w | 0.11412 | 1.00000 | 1.00000 | 1.00000 |
|               | Branch-site #5<br>(Fish)           | 102 | -30925.394879 | site class   | 0       | 1       | 2a      | 2b      |
|               |                                    |     |               | proportion   | 0.63803 | 0.36197 | 0.00000 | 0.00000 |
|               |                                    |     |               | background w | 0.11418 | 1.00000 | 0.11418 | 1.00000 |
|               |                                    |     |               | foreground w | 0.11418 | 1.00000 | 1.00000 | 1.00000 |
|               | Branch-site null #5<br>(Fish)      | 101 | -30930.444079 | site class   | 0       | 1       | 2a      | 2b      |
|               |                                    |     |               | proportion   | 0.63812 | 0.36188 | 0.00000 | 0.00000 |
|               |                                    |     |               | background w | 0.11420 | 1.00000 | 0.11420 | 1.00000 |
|               |                                    |     |               | foreground w | 0.11420 | 1.00000 | 1.00000 | 1.00000 |
| <b>FOX03a</b> | Branch-site #1<br>(Mammals)        | 102 | -38935.573507 | site class   | 0       | 1       | 2a      | 2b      |
|               |                                    |     |               | proportion   | 0.81509 | 0.18491 | 0.00000 | 0.00000 |
|               |                                    |     |               | background w | 0.09022 | 1.00000 | 0.09022 | 1.00000 |
|               |                                    |     |               | foreground w | 0.09022 | 1.00000 | 2.69405 | 2.69405 |
|               | Branch-site null #1<br>(Mammals)   | 101 | -38939.122607 | site class   | 0       | 1       | 2a      | 2b      |
|               |                                    |     |               | proportion   | 0.81501 | 0.18499 | 0.00000 | 0.00000 |
|               |                                    |     |               | background w | 0.09023 | 1.00000 | 0.09023 | 1.00000 |
|               |                                    |     |               | foreground w | 0.09023 | 1.00000 | 1.00000 | 1.00000 |

|                                         |     |               |              |         |         |           |           |
|-----------------------------------------|-----|---------------|--------------|---------|---------|-----------|-----------|
| Branch-site #2<br>(Birds)               | 102 | -38935.573518 | site class   | 0       | 1       | 2a        | 2b        |
|                                         |     |               | proportion   | 0.81510 | 0.18490 | 0.00000   | 0.00000   |
|                                         |     |               | background w | 0.09022 | 1.00000 | 0.09022   | 1.00000   |
|                                         |     |               | foreground w | 0.09022 | 1.00000 | 1.00000   | 1.00000   |
| Branch-site null #2<br>(Birds)          | 101 | -38938.600618 | site class   | 0       | 1       | 2a        | 2b        |
|                                         |     |               | proportion   | 0.81502 | 0.18498 | 0.00000   | 0.00000   |
|                                         |     |               | background w | 0.09029 | 1.00000 | 0.09029   | 1.00000   |
|                                         |     |               | foreground w | 0.09029 | 1.00000 | 1.00000   | 1.00000   |
| Branch-site #3<br>(Birds/Reptiles)      | 102 | -38933.906557 | site class   | 0       | 1       | 2a        | 2b        |
|                                         |     |               | proportion   | 0.81266 | 0.18401 | 0.00272   | 0.00062   |
|                                         |     |               | background w | 0.09004 | 1.00000 | 0.09004   | 1.00000   |
|                                         |     |               | foreground w | 0.09004 | 1.00000 | 27.74363  | 27.74363  |
| Branch-site null #3<br>(Birds/Reptiles) | 101 | -38937.013557 | site class   | 0       | 1       | 2a        | 2b        |
|                                         |     |               | proportion   | 0.81252 | 0.18382 | 0.00285   | 0.00082   |
|                                         |     |               | background w | 0.09003 | 1.00000 | 0.09003   | 1.00000   |
|                                         |     |               | foreground w | 0.09003 | 1.00000 | 1.00000   | 1.00000   |
| Branch-site #4<br>(Amphibian)           | 102 | -38922.535789 | site class   | 0       | 1       | 2a        | 2b        |
|                                         |     |               | proportion   | 0.78923 | 0.17906 | 0.02584   | 0.00586   |
|                                         |     |               | background w | 0.08918 | 1.00000 | 0.08918   | 1.00000   |
|                                         |     |               | foreground w | 0.08918 | 1.00000 | 998.94735 | 998.94735 |
| Branch-site null #4<br>(Amphibian)      | 101 | -38933.498589 | site class   | 0       | 1       | 2a        | 2b        |
|                                         |     |               | proportion   | 0.78925 | 0.17912 | 0.02579   | 0.00583   |
|                                         |     |               | background w | 0.08924 | 1.00000 | 0.08924   | 1.00000   |
|                                         |     |               | foreground w | 0.08924 | 1.00000 | 1.00000   | 1.00000   |

|              |                                  |     |               |              |         |         |           |           |
|--------------|----------------------------------|-----|---------------|--------------|---------|---------|-----------|-----------|
|              | Branch-site #5<br>(Fish)         | 102 | -38927.422004 | site class   | 0       | 1       | 2a        | 2b        |
|              |                                  |     |               | proportion   | 0.78869 | 0.17774 | 0.02740   | 0.00617   |
|              |                                  |     |               | background w | 0.08951 | 1.00000 | 0.08951   | 1.00000   |
|              |                                  |     |               | foreground w | 0.08951 | 1.00000 | 20.50811  | 20.50811  |
|              | Branch-site null #5<br>(Fish)    | 101 | -38935.042454 | site class   | 0       | 1       | 2a        | 2b        |
|              |                                  |     |               | proportion   | 0.77654 | 0.17634 | 0.03062   | 0.01650   |
|              |                                  |     |               | background w | 0.08952 | 1.00000 | 0.08952   | 1.00000   |
|              |                                  |     |               | foreground w | 0.08952 | 1.00000 | 1.00000   | 1.00000   |
| <i>PARPI</i> | Branch-site #1<br>(Mammals)      | 102 | -61077.131990 | site class   | 0       | 1       | 2a        | 2b        |
|              |                                  |     |               | proportion   | 0.81034 | 0.18460 | 0.00412   | 0.00094   |
|              |                                  |     |               | background w | 0.07227 | 1.00000 | 0.07227   | 1.00000   |
|              |                                  |     |               | foreground w | 0.07227 | 1.00000 | 251.03911 | 251.03911 |
|              | Branch-site null #1<br>(Mammals) | 101 | -61080.756293 | site class   | 0       | 1       | 2a        | 2b        |
|              |                                  |     |               | proportion   | 0.80447 | 0.18345 | 0.00984   | 0.00224   |
|              |                                  |     |               | background w | 0.07228 | 1.00000 | 0.07228   | 1.00000   |
|              |                                  |     |               | foreground w | 0.07228 | 1.00000 | 1.00000   | 1.00000   |
|              | Branch-site #2<br>(Birds)        | 102 | -61076.797603 | site class   | 0       | 1       | 2a        | 2b        |
|              |                                  |     |               | proportion   | 0.80779 | 0.18392 | 0.00675   | 0.00154   |
|              |                                  |     |               | background w | 0.07210 | 1.00000 | 0.07210   | 1.00000   |
|              |                                  |     |               | foreground w | 0.07210 | 1.00000 | 6.47247   | 6.47247   |
|              | Branch-site null #2<br>(Birds)   | 101 | -61079.205043 | site class   | 0       | 1       | 2a        | 2b        |
|              |                                  |     |               | proportion   | 0.79750 | 0.18187 | 0.01680   | 0.00383   |
|              |                                  |     |               | background w | 0.07209 | 1.00000 | 0.07209   | 1.00000   |
|              |                                  |     |               | foreground w | 0.07209 | 1.00000 | 1.00000   | 1.00000   |

|                                         |     |               |              |         |         |          |          |
|-----------------------------------------|-----|---------------|--------------|---------|---------|----------|----------|
| Branch-site #3<br>(Birds/Reptiles)      | 102 | -61079.954352 | site class   | 0       | 1       | 2a       | 2b       |
|                                         |     |               | proportion   | 0.81157 | 0.18514 | 0.00268  | 0.00061  |
|                                         |     |               | background w | 0.07229 | 1.00000 | 0.07229  | 1.00000  |
|                                         |     |               | foreground w | 0.07229 | 1.00000 | 12.82835 | 12.82835 |
| Branch-site null #3<br>(Birds/Reptiles) | 101 | -61082.867902 | site class   | 0       | 1       | 2a       | 2b       |
|                                         |     |               | proportion   | 0.82763 | 0.19009 | 0.00159  | 0.01931  |
|                                         |     |               | background w | 0.07216 | 1.00000 | 0.07216  | 1.00000  |
|                                         |     |               | foreground w | 0.07216 | 1.00000 | 1.00000  | 1.00000  |
| Branch-site #4<br>(Amphibian)           | 102 | -61059.880116 | site class   | 0       | 1       | 2a       | 2b       |
|                                         |     |               | proportion   | 0.79593 | 0.17831 | 0.02105  | 0.00471  |
|                                         |     |               | background w | 0.07199 | 1.00000 | 0.07199  | 1.00000  |
|                                         |     |               | foreground w | 0.07199 | 1.00000 | 25.21602 | 25.21602 |
| Branch-site null #4<br>(Amphibian)      | 101 | -61070.660566 | site class   | 0       | 1       | 2a       | 2b       |
|                                         |     |               | proportion   | 0.75145 | 0.17070 | 0.06344  | 0.01441  |
|                                         |     |               | background w | 0.07148 | 1.00000 | 0.07148  | 1.00000  |
|                                         |     |               | foreground w | 0.07148 | 1.00000 | 1.00000  | 1.00000  |
| Branch-site #5<br>(Fish)                | 102 | -61054.508022 | site class   | 0       | 1       | 2a       | 2b       |
|                                         |     |               | proportion   | 0.78332 | 0.17601 | 0.03321  | 0.00746  |
|                                         |     |               | background w | 0.07175 | 1.00000 | 0.07175  | 1.00000  |
|                                         |     |               | foreground w | 0.07175 | 1.00000 | 16.89611 | 16.89611 |
| Branch-site null #5<br>(Fish)           | 101 | -61066.746233 | site class   | 0       | 1       | 2a       | 2b       |
|                                         |     |               | proportion   | 0.73822 | 0.16845 | 0.07599  | 0.01734  |
|                                         |     |               | background w | 0.07115 | 1.00000 | 0.07115  | 1.00000  |
|                                         |     |               | foreground w | 0.07115 | 1.00000 | 1.00000  | 1.00000  |

|              |                     |    |               |              |         |         |           |           |
|--------------|---------------------|----|---------------|--------------|---------|---------|-----------|-----------|
| <b>PARP2</b> | Branch-site #1      | 78 | -38883.371059 | site class   | 0       | 1       | 2a        | 2b        |
|              | (Mammals)           |    |               | proportion   | 0.64832 | 0.33328 | 0.01215   | 0.00625   |
|              |                     |    |               | background w | 0.10409 | 1.00000 | 0.10409   | 1.00000   |
|              |                     |    |               | foreground w | 0.10409 | 1.00000 | 251.57836 | 251.57836 |
|              | Branch-site null #1 | 77 | -38889.059433 | site class   | 0       | 1       | 2a        | 2b        |
|              | (Mammals)           |    |               | proportion   | 0.65075 | 0.34041 | 0.00580   | 0.00303   |
|              |                     |    |               | background w | 0.10375 | 1.00000 | 0.10375   | 1.00000   |
|              |                     |    |               | foreground w | 0.10375 | 1.00000 | 1.00000   | 1.00000   |
|              | Branch-site         | 78 | -38884.369940 | site class   | 0       | 1       | 2a        | 2b        |
|              | (Reptiles)          |    |               | proportion   | 0.64401 | 0.33559 | 0.01341   | 0.00699   |
|              |                     |    |               | background w | 0.10347 | 1.00000 | 0.10347   | 1.00000   |
|              |                     |    |               | foreground w | 0.10347 | 1.00000 | 171.74271 | 171.74271 |
|              | Branch-site null    | 77 | -38888.771709 | site class   | 0       | 1       | 2a        | 2b        |
|              | (Reptiles)          |    |               | proportion   | 0.64378 | 0.33662 | 0.01287   | 0.00673   |
|              |                     |    |               | background w | 0.10353 | 1.00000 | 0.10353   | 1.00000   |
|              |                     |    |               | foreground w | 0.10353 | 1.00000 | 1.00000   | 1.00000   |
|              | Branch-site #4      | 78 | -38873.897205 | site class   | 0       | 1       | 2a        | 2b        |
|              | (Amphibian)         |    |               | proportion   | 0.62476 | 0.30747 | 0.04542   | 0.02235   |
|              |                     |    |               | background w | 0.10445 | 1.00000 | 0.10445   | 1.00000   |
|              |                     |    |               | foreground w | 0.10445 | 1.00000 | 42.33460  | 42.33460  |
|              | Branch-site null #4 | 77 | -38884.883940 | site class   | 0       | 1       | 2a        | 2b        |
|              | (Amphibian)         |    |               | proportion   | 0.61315 | 0.31396 | 0.04821   | 0.02468   |
|              |                     |    |               | background w | 0.10301 | 1.00000 | 0.10301   | 1.00000   |
|              |                     |    |               | foreground w | 0.10301 | 1.00000 | 1.00000   | 1.00000   |

|                 |                                  |     |               |              |         |         |           |           |
|-----------------|----------------------------------|-----|---------------|--------------|---------|---------|-----------|-----------|
|                 | Branch-site #5<br>(Fish)         | 78  | -38861.798644 | site class   | 0       | 1       | 2a        | 2b        |
|                 |                                  |     |               | proportion   | 0.60523 | 0.31870 | 0.04983   | 0.02624   |
|                 |                                  |     |               | background w | 0.10163 | 1.00000 | 0.10163   | 1.00000   |
|                 |                                  |     |               | foreground w | 0.10163 | 1.00000 | 188.08457 | 188.08457 |
|                 | Branch-site null #5<br>(Fish)    | 77  | -38880.530188 | site class   | 0       | 1       | 2a        | 2b        |
|                 |                                  |     |               | proportion   | 0.56678 | 0.29712 | 0.08929   | 0.04681   |
|                 |                                  |     |               | background w | 0.10113 | 1.00000 | 0.10113   | 1.00000   |
|                 |                                  |     |               | foreground w | 0.10113 | 1.00000 | 1.00000   | 1.00000   |
| <i>PPARGCIA</i> | Branch-site #1<br>(Mammals)      | 100 | -43108.340734 | site class   | 0       | 1       | 2a        | 2b        |
|                 |                                  |     |               | proportion   | 0.66562 | 0.33438 | 0.00000   | 0.00000   |
|                 |                                  |     |               | background w | 0.10326 | 1.00000 | 0.10326   | 1.00000   |
|                 |                                  |     |               | foreground w | 0.10326 | 1.00000 | 1.00000   | 1.00000   |
|                 | Branch-site null #1<br>(Mammals) | 99  | -43111.422284 | site class   | 0       | 1       | 2a        | 2b        |
|                 |                                  |     |               | proportion   | 0.66551 | 0.33449 | 0.00000   | 0.00000   |
|                 |                                  |     |               | background w | 0.10327 | 1.00000 | 0.10327   | 1.00000   |
|                 |                                  |     |               | foreground w | 0.10327 | 1.00000 | 1.00000   | 1.00000   |
|                 | Branch-site #2<br>(Birds)        | 100 | -43108.340734 | site class   | 0       | 1       | 2a        | 2b        |
|                 |                                  |     |               | proportion   | 0.66562 | 0.33438 | 0.00000   | 0.00000   |
|                 |                                  |     |               | background w | 0.10326 | 1.00000 | 0.10326   | 1.00000   |
|                 |                                  |     |               | foreground w | 0.10326 | 1.00000 | 1.00000   | 1.00000   |
|                 | Branch-site null #2<br>(Birds)   | 99  | -43110.045834 | site class   | 0       | 1       | 2a        | 2b        |
|                 |                                  |     |               | proportion   | 0.66430 | 0.33570 | 0.00000   | 0.00000   |
|                 |                                  |     |               | background w | 0.10128 | 1.00000 | 0.10128   | 1.00000   |
|                 |                                  |     |               | foreground w | 0.10128 | 1.00000 | 1.00000   | 1.00000   |

|                                         |     |               |              |         |         |         |         |
|-----------------------------------------|-----|---------------|--------------|---------|---------|---------|---------|
| Branch-site #3<br>(Birds/Reptiles)      | 100 | -43108.340736 | site class   | 0       | 1       | 2a      | 2b      |
|                                         |     |               | proportion   | 0.66562 | 0.33438 | 0.00000 | 0.00000 |
|                                         |     |               | background w | 0.10326 | 1.00000 | 0.10326 | 1.00000 |
|                                         |     |               | foreground w | 0.10326 | 1.00000 | 1.00000 | 1.00000 |
| Branch-site null #3<br>(Birds/Reptiles) | 99  | -43111.731236 | site class   | 0       | 1       | 2a      | 2b      |
|                                         |     |               | proportion   | 0.65541 | 0.34459 | 0.00000 | 0.00000 |
|                                         |     |               | background w | 0.10208 | 1.00000 | 0.10208 | 1.00000 |
|                                         |     |               | foreground w | 0.10208 | 1.00000 | 1.00000 | 1.00000 |
| Branch-site #4<br>(Amphibian)           | 100 | -43108.340734 | site class   | 0       | 1       | 2a      | 2b      |
|                                         |     |               | proportion   | 0.66562 | 0.33438 | 0.00000 | 0.00000 |
|                                         |     |               | background w | 0.10326 | 1.00000 | 0.10326 | 1.00000 |
|                                         |     |               | foreground w | 0.10326 | 1.00000 | 1.00000 | 1.00000 |
| Branch-site null #4<br>(Amphibian)      | 99  | -43111.662184 | site class   | 0       | 1       | 2a      | 2b      |
|                                         |     |               | proportion   | 0.64202 | 0.35798 | 0.00000 | 0.00000 |
|                                         |     |               | background w | 0.10329 | 1.00000 | 0.10329 | 1.00000 |
|                                         |     |               | foreground w | 0.10329 | 1.00000 | 1.00000 | 1.00000 |
| Branch-site #5<br>(Fish)                | 100 | -43107.047250 | site class   | 0       | 1       | 2a      | 2b      |
|                                         |     |               | proportion   | 0.65594 | 0.32580 | 0.01220 | 0.00606 |
|                                         |     |               | background w | 0.10269 | 1.00000 | 0.10269 | 1.00000 |
|                                         |     |               | foreground w | 0.10269 | 1.00000 | 4.18203 | 4.18203 |
| Branch-site null #5<br>(Fish)           | 99  | -43109.5773   | site class   | 0       | 1       | 2a      | 2b      |
|                                         |     |               | proportion   | 0.65472 | 0.32572 | 0.01295 | 0.00661 |
|                                         |     |               | background w | 0.10254 | 1.00000 | 0.10254 | 1.00000 |
|                                         |     |               | foreground w | 0.10254 | 1.00000 | 1.00000 | 1.00000 |



|              |                     |     |               |              |         |         |         |         |
|--------------|---------------------|-----|---------------|--------------|---------|---------|---------|---------|
| <i>SIRTI</i> | Branch-site #1      | 100 | -43627.353497 | site class   | 0       | 1       | 2a      | 2b      |
|              | (Mammals)           |     |               | proportion   | 0.54289 | 0.45711 | 0.00000 | 0.00000 |
|              |                     |     |               | background w | 0.05190 | 1.00000 | 0.05190 | 1.00000 |
|              |                     |     |               | foreground w | 0.05190 | 1.00000 | 1.00000 | 1.00000 |
|              | Branch-site null #1 | 99  | -43629.399897 | site class   | 0       | 1       | 2a      | 2b      |
|              | (Mammals)           |     |               | proportion   | 0.54291 | 0.45709 | 0.00000 | 0.00000 |
|              |                     |     |               | background w | 0.05187 | 1.00000 | 0.05187 | 1.00000 |
|              |                     |     |               | foreground w | 0.05187 | 1.00000 | 1.00000 | 1.00000 |
|              | Branch-site #2      | 100 | -43627.353505 | site class   | 0       | 1       | 2a      | 2b      |
|              | (Birds)             |     |               | proportion   | 0.54289 | 0.45711 | 0.00000 | 0.00000 |
|              |                     |     |               | background w | 0.05190 | 1.00000 | 0.05190 | 1.00000 |
|              |                     |     |               | foreground w | 0.05190 | 1.00000 | 1.00000 | 1.00000 |
|              | Branch-site null #2 | 99  | -43629.745105 | site class   | 0       | 1       | 2a      | 2b      |
|              | (Birds)             |     |               | proportion   | 0.54186 | 0.45814 | 0.00000 | 0.00000 |
|              |                     |     |               | background w | 0.05078 | 1.00000 | 0.05078 | 1.00000 |
|              |                     |     |               | foreground w | 0.05078 | 1.00000 | 1.00000 | 1.00000 |
|              | Branch-site #3      | 100 | -43627.353499 | site class   | 0       | 1       | 2a      | 2b      |
|              | (Birds/Reptiles)    |     |               | proportion   | 0.54289 | 0.45711 | 0.00000 | 0.00000 |
|              |                     |     |               | background w | 0.05190 | 1.00000 | 0.05190 | 1.00000 |
|              |                     |     |               | foreground w | 0.05190 | 1.00000 | 1.00000 | 1.00000 |
|              | Branch-site null #3 | 99  | -43629.854099 | site class   | 0       | 1       | 2a      | 2b      |
|              | (Birds/Reptiles)    |     |               | proportion   | 0.53158 | 0.46842 | 0.00000 | 0.00000 |
|              |                     |     |               | background w | 0.05191 | 1.00000 | 0.05191 | 1.00000 |
|              |                     |     |               | foreground w | 0.05191 | 1.00000 | 1.00000 | 1.00000 |

|              |                                    |     |               |              |         |         |           |           |
|--------------|------------------------------------|-----|---------------|--------------|---------|---------|-----------|-----------|
|              | Branch-site #4<br>(Amphibian)      | 100 | -43625.175152 | site class   | 0       | 1       | 2a        | 2b        |
|              |                                    |     |               | proportion   | 0.52422 | 0.44249 | 0.01805   | 0.01524   |
|              |                                    |     |               | background w | 0.05098 | 1.00000 | 0.05098   | 1.00000   |
|              |                                    |     |               | foreground w | 0.05098 | 1.00000 | 1.00000   | 1.00000   |
|              | Branch-site null #4<br>(Amphibian) | 99  | -43629.721902 | site class   | 0       | 1       | 2a        | 2b        |
|              |                                    |     |               | proportion   | 0.52834 | 0.44250 | 0.01702   | 0.01214   |
|              |                                    |     |               | background w | 0.05099 | 1.00000 | 0.05099   | 1.00000   |
|              |                                    |     |               | foreground w | 0.05099 | 1.00000 | 1.00000   | 1.00000   |
|              | Branch-site #5<br>(Fish)           | 100 | -43621.181594 | site class   | 0       | 1       | 2a        | 2b        |
|              |                                    |     |               | proportion   | 0.52954 | 0.44190 | 0.01557   | 0.01299   |
|              |                                    |     |               | background w | 0.05148 | 1.00000 | 0.05148   | 1.00000   |
|              |                                    |     |               | foreground w | 0.05148 | 1.00000 | 998.99613 | 998.99613 |
|              | Branch-site null #5<br>(Fish)      | 99  | -43623.749044 | site class   | 0       | 1       | 2a        | 2b        |
|              |                                    |     |               | proportion   | 0.52962 | 0.44198 | 0.01543   | 0.01297   |
|              |                                    |     |               | background w | 0.05140 | 1.00000 | 0.05140   | 1.00000   |
|              |                                    |     |               | foreground w | 0.05140 | 1.00000 | 1.00000   | 1.00000   |
| <b>SIRT2</b> | Branch-site #1<br>(Mammals)        | 86  | -26945.165813 | site class   | 0       | 1       | 2a        | 2b        |
|              |                                    |     |               | proportion   | 0.68166 | 0.28773 | 0.02152   | 0.00908   |
|              |                                    |     |               | background w | 0.08111 | 1.00000 | 0.08111   | 1.00000   |
|              |                                    |     |               | foreground w | 0.08111 | 1.00000 | 28.52968  | 28.52968  |
|              | Branch-site null #1<br>(Mammals)   | 85  | -26948.711963 | ite class    | 0       | 1       | 2a        | 2b        |
|              |                                    |     |               | proportion   | 0.68178 | 0.28775 | 0.02140   | 0.00906   |
|              |                                    |     |               | background w | 0.08129 | 1.00000 | 0.08129   | 1.00000   |
|              |                                    |     |               | foreground w | 0.08129 | 1.00000 | 1.00000   | 1.00000   |

|                                         |    |               |              |         |         |           |           |
|-----------------------------------------|----|---------------|--------------|---------|---------|-----------|-----------|
| Branch-site #2<br>(Birds)               | 86 | -26950.612331 | site class   | 0       | 1       | 2a        | 2b        |
|                                         |    |               | proportion   | 0.69067 | 0.29731 | 0.00840   | 0.00362   |
|                                         |    |               | background w | 0.08122 | 1.00000 | 0.08122   | 1.00000   |
|                                         |    |               | foreground w | 0.08122 | 1.00000 | 157.14276 | 157.14276 |
| Branch-site null #2<br>(Birds)          | 85 | -26954.110481 | site class   | 0       | 1       | 2a        | 2b        |
|                                         |    |               | proportion   | 0.69265 | 0.29850 | 0.00638   | 0.00247   |
|                                         |    |               | background w | 0.08069 | 1.00000 | 0.08069   | 1.00000   |
|                                         |    |               | foreground w | 0.08069 | 1.00000 | 1.00000   | 1.00000   |
| Branch-site #3<br>(Birds/Reptiles)      | 86 | -26942.816770 | site class   | 0       | 1       | 2a        | 2b        |
|                                         |    |               | proportion   | 0.68439 | 0.29303 | 0.01581   | 0.00677   |
|                                         |    |               | background w | 0.08074 | 1.00000 | 0.08074   | 1.00000   |
|                                         |    |               | foreground w | 0.08074 | 1.00000 | 172.82907 | 172.82907 |
| Branch-site null #3<br>(Birds/Reptiles) | 85 | -26950.41352  | site class   | 0       | 1       | 2a        | 2b        |
|                                         |    |               | proportion   | 0.68226 | 0.29210 | 0.01789   | 0.00685   |
|                                         |    |               | background w | 0.08075 | 1.00000 | 0.08075   | 1.00000   |
|                                         |    |               | foreground w | 0.08075 | 1.00000 | 1.00000   | 1.00000   |
| Branch-site #4<br>(Amphibian)           | 86 | -26951.693147 | site class   | 0       | 1       | 2a        | 2b        |
|                                         |    |               | proportion   | 0.69126 | 0.29805 | 0.00747   | 0.00322   |
|                                         |    |               | background w | 0.08114 | 1.00000 | 0.08114   | 1.00000   |
|                                         |    |               | foreground w | 0.08114 | 1.00000 | 4.88201   | 4.88201   |
| Branch-site null #4<br>(Amphibian)      | 85 | -26953.701797 | site class   | 0       | 1       | 2a        | 2b        |
|                                         |    |               | proportion   | 0.69114 | 0.29710 | 0.00762   | 0.00332   |
|                                         |    |               | background w | 0.08109 | 1.00000 | 0.08109   | 1.00000   |
|                                         |    |               | foreground w | 0.08109 | 1.00000 | 1.00000   | 1.00000   |

|             |                                  |    |               |              |         |         |           |           |
|-------------|----------------------------------|----|---------------|--------------|---------|---------|-----------|-----------|
|             | Branch-site #5<br>(Fish)         | 86 | -26934.971329 | site class   | 0       | 1       | 2a        | 2b        |
|             |                                  |    |               | proportion   | 0.65809 | 0.27556 | 0.04677   | 0.01958   |
|             |                                  |    |               | background w | 0.08100 | 1.00000 | 0.08100   | 1.00000   |
|             |                                  |    |               | foreground w | 0.08100 | 1.00000 | 999.00000 | 999.00000 |
|             | Branch-site null #5<br>(Fish)    | 85 | -26949.019929 | site class   | 0       | 1       | 2a        | 2b        |
|             |                                  |    |               | proportion   | 0.65817 | 0.27565 | 0.04668   | 0.01950   |
|             |                                  |    |               | background w | 0.08114 | 1.00000 | 0.08114   | 1.00000   |
|             |                                  |    |               | foreground w | 0.08114 | 1.00000 | 1.00000   | 1.00000   |
| <i>SOD3</i> | Branch-site #1<br>(Mammals)      | 96 | -19858.187943 | site class   | 0       | 1       | 2a        | 2b        |
|             |                                  |    |               | proportion   | 0.43924 | 0.49242 | 0.03222   | 0.03612   |
|             |                                  |    |               | background w | 0.12728 | 1.00000 | 0.12728   | 1.00000   |
|             |                                  |    |               | foreground w | 0.12728 | 1.00000 | 362.12813 | 362.12813 |
|             | Branch-site null #1<br>(Mammals) | 95 | -19861.204193 | site class   | 0       | 1       | 2a        | 2b        |
|             |                                  |    |               | proportion   | 0.43812 | 0.49234 | 0.03229   | 0.03625   |
|             |                                  |    |               | background w | 0.12908 | 1.00000 | 0.12908   | 1.00000   |
|             |                                  |    |               | foreground w | 0.12908 | 1.00000 | 1.00000   | 1.00000   |
|             | Branch-site #2<br>(Birds)        | 96 | -19867.546063 | site class   | 0       | 1       | 2a        | 2b        |
|             |                                  |    |               | proportion   | 0.46905 | 0.53095 | 0.00000   | 0.00000   |
|             |                                  |    |               | background w | 0.12957 | 1.00000 | 0.12957   | 1.00000   |
|             |                                  |    |               | foreground w | 0.12957 | 1.00000 | 1.00000   | 1.00000   |
|             | Branch-site null #2<br>(Birds)   | 95 | -19870.780313 | site class   | 0       | 1       | 2a        | 2b        |
|             |                                  |    |               | proportion   | 0.46903 | 0.53097 | 0.00000   | 0.00000   |
|             |                                  |    |               | background w | 0.12893 | 1.00000 | 0.12893   | 1.00000   |
|             |                                  |    |               | foreground w | 0.12893 | 1.00000 | 1.00000   | 1.00000   |

|                                         |    |               |              |         |         |           |           |
|-----------------------------------------|----|---------------|--------------|---------|---------|-----------|-----------|
| Branch-site #3<br>(Birds/Reptiles)      | 96 | -19866.642871 | site class   | 0       | 1       | 2a        | 2b        |
|                                         |    |               | proportion   | 0.46640 | 0.51719 | 0.00778   | 0.00863   |
|                                         |    |               | background w | 0.12998 | 1.00000 | 0.12998   | 1.00000   |
|                                         |    |               | foreground w | 0.12998 | 1.00000 | 9.06156   | 9.06156   |
| Branch-site null #3<br>(Birds/Reptiles) | 95 | -19870.692621 | site class   | 0       | 1       | 2a        | 2b        |
|                                         |    |               | proportion   | 0.46622 | 0.51717 | 0.00789   | 0.00872   |
|                                         |    |               | background w | 0.12876 | 1.00000 | 0.12876   | 1.00000   |
|                                         |    |               | foreground w | 0.12876 | 1.00000 | 1.00000   | 1.00000   |
| Branch-site #4<br>(Amphibian)           | 96 | -19866.748346 | site class   | 0       | 1       | 2a        | 2b        |
|                                         |    |               | proportion   | 0.45924 | 0.51347 | 0.01289   | 0.01441   |
|                                         |    |               | background w | 0.13002 | 1.00000 | 0.13002   | 1.00000   |
|                                         |    |               | foreground w | 0.13002 | 1.00000 | 10.35377  | 10.35377  |
| Branch-site null #4<br>(Amphibian)      | 95 | -19871.298796 | site class   | 0       | 1       | 2a        | 2b        |
|                                         |    |               | proportion   | 0.45012 | 0.51107 | 0.01391   | 0.02491   |
|                                         |    |               | background w | 0.13312 | 1.00000 | 0.13312   | 1.00000   |
|                                         |    |               | foreground w | 0.13312 | 1.00000 | 1.00000   | 1.00000   |
| Branch-site #5<br>(Fish)                | 96 | -19862.561954 | site class   | 0       | 1       | 2a        | 2b        |
|                                         |    |               | proportion   | 0.44467 | 0.46020 | 0.04675   | 0.04838   |
|                                         |    |               | background w | 0.13422 | 1.00000 | 0.13422   | 1.00000   |
|                                         |    |               | foreground w | 0.13422 | 1.00000 | 999.00000 | 999.00000 |
| Branch-site null #5<br>(Fish)           | 95 | -19868.661404 | site class   | 0       | 1       | 2a        | 2b        |
|                                         |    |               | proportion   | 0.44677 | 0.46119 | 0.04375   | 0.04829   |
|                                         |    |               | background w | 0.13421 | 1.00000 | 0.13421   | 1.00000   |
|                                         |    |               | foreground w | 0.13421 | 1.00000 | 1.00000   | 1.00000   |

|             |                     |    |               |              |         |         |           |           |
|-------------|---------------------|----|---------------|--------------|---------|---------|-----------|-----------|
| <i>TP53</i> | Branch-site #1      | 78 | -27706.106253 | site class   | 0       | 1       | 2a        | 2b        |
|             | (Mammals)           |    |               | proportion   | 0.50565 | 0.45732 | 0.01944   | 0.01758   |
|             |                     |    |               | background w | 0.09401 | 1.00000 | 0.09401   | 1.00000   |
|             |                     |    |               | foreground w | 0.09401 | 1.00000 | 834.09156 | 834.09156 |
|             | Branch-site null #1 | 77 | -27710.564903 | site class   | 0       | 1       | 2a        | 2b        |
|             | (Mammals)           |    |               | proportion   | 0.50697 | 0.45835 | 0.01909   | 0.01558   |
|             |                     |    |               | background w | 0.09381 | 1.00000 | 0.09381   | 1.00000   |
|             |                     |    |               | foreground w | 0.09381 | 1.00000 | 1.00000   | 1.00000   |
|             | Branch-site #2      | 78 | -27701.790550 | site class   | 0       | 1       | 2a        | 2b        |
|             | (Birds)             |    |               | proportion   | 0.49185 | 0.45047 | 0.03011   | 0.02757   |
|             |                     |    |               | background w | 0.09304 | 1.00000 | 0.09304   | 1.00000   |
|             |                     |    |               | foreground w | 0.09304 | 1.00000 | 92.55009  | 92.55009  |
|             | Branch-site null #2 | 77 | -27703.735200 | site class   | 0       | 1       | 2a        | 2b        |
|             | (Birds)             |    |               | proportion   | 0.50287 | 0.45050 | 0.02006   | 0.02657   |
|             |                     |    |               | background w | 0.09321 | 1.00000 | 0.09321   | 1.00000   |
|             |                     |    |               | foreground w | 0.09321 | 1.00000 | 1.00000   | 1.00000   |
|             | Branch-site #3      | 78 | -27708.436755 | site class   | 0       | 1       | 2a        | 2b        |
|             | (Birds/Reptiles)    |    |               | proportion   | 0.52037 | 0.47963 | 0.00000   | 0.00000   |
|             |                     |    |               | background w | 0.09401 | 1.00000 | 0.09401   | 1.00000   |
|             |                     |    |               | foreground w | 0.09401 | 1.00000 | 1.00000   | 1.00000   |
|             | Branch-site null #3 | 77 | -27710.982555 | site class   | 0       | 1       | 2a        | 2b        |
|             | (Birds/Reptiles)    |    |               | proportion   | 0.52139 | 0.47861 | 0.00000   | 0.00000   |
|             |                     |    |               | background w | 0.09403 | 1.00000 | 0.09403   | 1.00000   |
|             |                     |    |               | foreground w | 0.09403 | 1.00000 | 1.00000   | 1.00000   |

|              |                                    |    |               |              |         |         |          |          |
|--------------|------------------------------------|----|---------------|--------------|---------|---------|----------|----------|
|              | Branch-site #4<br>(Amphibian)      | 78 | -27708.436768 | site class   | 0       | 1       | 2a       | 2b       |
|              |                                    |    |               | proportion   | 0.49375 | 0.45509 | 0.02663  | 0.02454  |
|              |                                    |    |               | background w | 0.09401 | 1.00000 | 0.09401  | 1.00000  |
|              |                                    |    |               | foreground w | 0.09401 | 1.00000 | 1.17904  | 1.17904  |
|              | Branch-site null #4<br>(Amphibian) | 77 | -27713.482968 | site class   | 0       | 1       | 2a       | 2b       |
|              |                                    |    |               | proportion   | 0.49380 | 0.45604 | 0.02588  | 0.02429  |
|              |                                    |    |               | background w | 0.09398 | 1.00000 | 0.09398  | 1.00000  |
|              |                                    |    |               | foreground w | 0.09398 | 1.00000 | 1.00000  | 1.00000  |
|              | Branch-site #5<br>(Fish)           | 78 | -27700.442422 | site class   | 0       | 1       | 2a       | 2b       |
|              |                                    |    |               | proportion   | 0.48957 | 0.45474 | 0.02887  | 0.02681  |
|              |                                    |    |               | background w | 0.09196 | 1.00000 | 0.09196  | 1.00000  |
|              |                                    |    |               | foreground w | 0.09196 | 1.00000 | 35.63319 | 35.63319 |
|              | Branch-site null #5<br>(Fish)      | 77 | -27710.534172 | site class   | 0       | 1       | 2a       | 2b       |
|              |                                    |    |               | proportion   | 0.48962 | 0.45489 | 0.02879  | 0.02669  |
|              |                                    |    |               | background w | 0.09290 | 1.00000 | 0.09290  | 1.00000  |
|              |                                    |    |               | foreground w | 0.09290 | 1.00000 | 1.00000  | 1.00000  |
| <b>SIRT6</b> | Branch-site #1<br>(Mammals)        | 94 | -26980.481368 | site class   | 0       | 1       | 2a       | 2b       |
|              |                                    |    |               | proportion   | 0.65686 | 0.31285 | 0.02052  | 0.00977  |
|              |                                    |    |               | background w | 0.09346 | 1.00000 | 0.09346  | 1.00000  |
|              |                                    |    |               | foreground w | 0.09346 | 1.00000 | 8.79210  | 8.79210  |
|              | Branch-site null #1<br>(Mammals)   | 93 | -26985.218468 | site class   | 0       | 1       | 2a       | 2b       |
|              |                                    |    |               | proportion   | 0.65083 | 0.31282 | 0.02560  | 0.01075  |
|              |                                    |    |               | background w | 0.09347 | 1.00000 | 0.09347  | 1.00000  |
|              |                                    |    |               | foreground w | 0.09347 | 1.00000 | 1.00000  | 1.00000  |

|                                         |    |               |              |         |         |           |           |
|-----------------------------------------|----|---------------|--------------|---------|---------|-----------|-----------|
| Branch-site #2<br>(Birds)               | 94 | -26984.548942 | site class   | 0       | 1       | 2a        | 2b        |
|                                         |    |               | proportion   | 0.67547 | 0.32453 | 0.00000   | 0.00000   |
|                                         |    |               | background w | 0.09370 | 1.00000 | 0.09370   | 1.00000   |
|                                         |    |               | foreground w | 0.09370 | 1.00000 | 1.00000   | 1.00000   |
| Branch-site null #2<br>(Birds)          | 93 | -26989.034142 | site class   | 0       | 1       | 2a        | 2b        |
|                                         |    |               | proportion   | 0.66520 | 0.33480 | 0.00000   | 0.00000   |
|                                         |    |               | background w | 0.09378 | 1.00000 | 0.09378   | 1.00000   |
|                                         |    |               | foreground w | 0.09378 | 1.00000 | 1.00000   | 1.00000   |
| Branch-site #3<br>(Birds/Reptiles)      | 94 | -26984.548942 | site class   | 0       | 1       | 2a        | 2b        |
|                                         |    |               | proportion   | 0.67547 | 0.32453 | 0.00000   | 0.00000   |
|                                         |    |               | background w | 0.09370 | 1.00000 | 0.09370   | 1.00000   |
|                                         |    |               | foreground w | 0.09370 | 1.00000 | 1.00000   | 1.00000   |
| Branch-site null #3<br>(Birds/Reptiles) | 93 | -26988.060742 | site class   | 0       | 1       | 2a        | 2b        |
|                                         |    |               | proportion   | 0.67425 | 0.32575 | 0.00000   | 0.00000   |
|                                         |    |               | background w | 0.09371 | 1.00000 | 0.09371   | 1.00000   |
|                                         |    |               | foreground w | 0.09371 | 1.00000 | 1.00000   | 1.00000   |
| Branch-site #4<br>(Amphibian)           | 94 | -26976.180244 | site class   | 0       | 1       | 2a        | 2b        |
|                                         |    |               | proportion   | 0.65047 | 0.30576 | 0.02978   | 0.01400   |
|                                         |    |               | background w | 0.09333 | 1.00000 | 0.09333   | 1.00000   |
|                                         |    |               | foreground w | 0.09333 | 1.00000 | 500.19230 | 500.19230 |
| Branch-site null #4<br>(Amphibian)      | 93 | -26980.499194 | site class   | 0       | 1       | 2a        | 2b        |
|                                         |    |               | proportion   | 0.53027 | 0.28948 | 0.03775   | 0.01593   |
|                                         |    |               | background w | 0.09332 | 1.00000 | 0.09332   | 1.00000   |
|                                         |    |               | foreground w | 0.09332 | 1.00000 | 1.00000   | 1.00000   |



|                               |    |               |              |         |         |           |           |
|-------------------------------|----|---------------|--------------|---------|---------|-----------|-----------|
| Branch-site #5<br>(Fish)      | 94 | -26957.679678 | site class   | 0       | 1       | 2a        | 2b        |
|                               |    |               | proportion   | 0.60519 | 0.29354 | 0.06820   | 0.03308   |
|                               |    |               | background w | 0.09230 | 1.00000 | 0.09230   | 1.00000   |
|                               |    |               | foreground w | 0.09230 | 1.00000 | 999.00000 | 999.00000 |
| Branch-site null #5<br>(Fish) | 93 | -26967.210578 | site class   | 0       | 1       | 2a        | 2b        |
|                               |    |               | proportion   | 0.61550 | 0.30323 | 0.06016   | 0.02112   |
|                               |    |               | background w | 0.09121 | 1.00000 | 0.09121   | 1.00000   |
|                               |    |               | foreground w | 0.09121 | 1.00000 | 1.00000   | 1.00000   |
