# Supplementary material for: Molecular evolutionary patterns of NAD+/Sirtuin aging signaling pathway across taxa
Source: PubMed Central journal article supplement (PMC5540417; doi:10.1371/journal.pone.0182306), 2017-08-02
Supplement: pone.0182306.s004.pdf [file pone.0182306.s004.pdf]

S4 Table. Likelihood ratio tests for positive selection using branch-site models

| Gene            | Models Compared                 | 2ΔlnL   | df | p value      |
|-----------------|---------------------------------|---------|----|--------------|
| <i>MRPS5</i>    | Branch-site #1 (Mammals)        | 14.8240 | 1  | $p < 0.001$  |
|                 | Branch-site #2 (Birds)          | 8.9825  | 1  | $p = 0.0027$ |
|                 | Branch-site #3 (Birds/Reptiles) | 3.9416  | 1  | $p = 0.047$  |
|                 | Branch-site #4 (Amphibian)      | 12.7362 | 1  | $p < 0.001$  |
|                 | Branch-site #5 (Fish)           | 10.0984 | 1  | $p = 0.0015$ |
| <i>FOXO3a</i>   | Branch-site #1 (Mammals)        | 7.0982  | 1  | $p = 0.008$  |
|                 | Branch-site #2 (Birds)          | 6.0542  | 1  | $p = 0.014$  |
|                 | Branch-site #3 (Birds/Reptiles) | 6.2140  | 1  | $p = 0.013$  |
|                 | Branch-site #4 (Amphibian)      | 21.9256 | 1  | $p < 0.001$  |
|                 | Branch-site #5 (Fish)           | 15.2409 | 1  | $p < 0.001$  |
| <i>PARP1</i>    | Branch-site #1 (Mammals)        | 7.2486  | 1  | $p = 0.007$  |
|                 | Branch-site #2 (Birds)          | 4.8149  | 1  | $p = 0.03$   |
|                 | Branch-site #3 (Birds/Reptiles) | 5.8271  | 1  | $p = 0.016$  |
|                 | Branch-site #4 (Amphibian)      | 21.5609 | 1  | $p < 0.001$  |
|                 | Branch-site #5 (Fish)           | 24.4764 | 1  | $p < 0.001$  |
| <i>PARP2</i>    | Branch-site #1 (Mammals)        | 11.3767 | 1  | $p < 0.001$  |
|                 | Branch-site (Reptiles)          | 8.8035  | 1  | $p = 0.003$  |
|                 | Branch-site #4 (Amphibian)      | 21.9734 | 1  | $p < 0.001$  |
|                 | Branch-site #5 (Fish)           | 37.4631 | 1  | $p < 0.001$  |
| <i>PPARGC1A</i> | Branch-site #1 (Mammals)        | 6.1631  | 1  | $p = 0.013$  |
|                 | Branch-site #2 (Birds)          | 3.4102  | 1  | $p = 0.06$   |
|                 | Branch-site #3 (Birds/Reptiles) | 6.7810  | 1  | $p = 0.009$  |
|                 | Branch-site #4 (Amphibian)      | 6.6429  | 1  | $p = 0.01$   |
|                 | Branch-site #5 (Fish)           | 5.0601  | 1  | $p = 0.024$  |
| <i>SIRT1</i>    | Branch-site #1 (Mammals)        | 4.0928  | 1  | $p = 0.04$   |
|                 | Branch-site #2 (Birds)          | 4.7832  | 1  | $p = 0.03$   |
|                 | Branch-site #3 (Birds/Reptiles) | 5.0012  | 1  | $p = 0.025$  |
|                 | Branch-site #4 (Amphibian)      | 9.0935  | 1  | $p = 0.003$  |
|                 | Branch-site #5 (Fish)           | 5.1349  | 1  | $p = 0.023$  |
| <i>SIRT2</i>    | Branch-site #1 (Mammals)        | 7.0923  | 1  | $p = 0.008$  |
|                 | Branch-site #2 (Birds)          | 6.9963  | 1  | $p = 0.008$  |
|                 | Branch-site #3 (Birds/Reptiles) | 15.1935 | 1  | $p < 0.001$  |
|                 | Branch-site #4 (Amphibian)      | 4.0173  | 1  | $p = 0.045$  |
|                 | Branch-site #5 (Fish)           | 28.0972 | 1  | $p < 0.001$  |
| <i>SOD3</i>     | Branch-site #1 (Mammals)        | 6.0325  | 1  | $p = 0.014$  |
|                 | Branch-site #2 (Birds)          | 6.4685  | 1  | $p = 0.011$  |
|                 | Branch-site #3 (Birds/Reptiles) | 8.0995  | 1  | $p = 0.004$  |
|                 | Branch-site #4 (Amphibian)      | 9.1009  | 1  | $p = 0.002$  |
|                 | Branch-site #5 (Fish)           | 12.1989 | 1  | $p < 0.001$  |
| <i>TP53</i>     | Branch-site #1 (Mammals)        | 8.9173  | 1  | $p = 0.003$  |
|                 | Branch-site #2 (Birds)          | 3.8893  | 1  | $p = 0.048$  |
|                 | Branch-site #3 (Birds/Reptiles) | 5.0916  | 1  | $p = 0.024$  |

|              |                                 |         |   |           |
|--------------|---------------------------------|---------|---|-----------|
|              | Branch-site #4 (Amphibian)      | 10.0924 | 1 | $p=0.001$ |
|              | Branch-site #5 (Fish)           | 20.1835 | 1 | $p<0.001$ |
| <i>SIRT6</i> | Branch-site #1 (Mammals)        | 9.4742  | 1 | $p=0.002$ |
|              | Branch-site #2 (Birds)          | 8.9704  | 1 | $p=0.003$ |
|              | Branch-site #3 (Birds/Reptiles) | 7.0236  | 1 | $p=0.008$ |
|              | Branch-site #4 (Amphibian)      | 8.6379  | 1 | $p=0.003$ |
|              | Branch-site #5 (Fish)           | 19.0618 | 1 | $p<0.001$ |

Note: The p value adjusted by Bonferroni correction for multiple testing is 0.001.
